# Supplementary material for: Terrestrial biosphere changes over the last 120 kyr
Source: Copernicus journal article supplement (doi:10.5194/cp-12-51-2016), 2016-01-18
Supplement: Supplementary file 1 [file cp-12-51-2016-supplement.zip]

Archive with 29 entries (23 files):
- supplement/
- supplement/SI_1_biome_scores.pdf
- supplement/North_America/
- supplement/North_America/NorthAmerica_scores_Williamsetal2000.xls
- supplement/North_America/BiomizationThompsonandAnderson2000.xls
- supplement/North_America/NorthAmerica_scores_ThompsonandAnderson2000.xls
- supplement/North_America/BiomizationWilliamsetal2000.xls
- supplement/Africa/
- supplement/Africa/BiomizationAfricaJollyetal1998.xls
- supplement/Africa/Africa_scores.xls
- supplement/Australasia/
- supplement/Australasia/BiomizationPickettetal2004.xls
- supplement/Australasia/JapanTakaharaetal1999.xls
- supplement/Australasia/Baikal_scores_Tarasovetal.xls
- supplement/Australasia/Japan_scores_Takahashietal1999.xls
- supplement/Australasia/BiomizationTarasovaetal.xls
- supplement/Australasia/Asia_Australiascores_Pickettetal2004.xls
- supplement/South_America/
- supplement/South_America/BiomizationMarchantetal2009.xls
- supplement/South_America/LatinAmerica_scores.xls
- supplement/SI_2_CO2_sensitivity.pdf
- supplement/Europe/
- supplement/Europe/BiomizationAlpsPrenticeetal.xls
- supplement/Europe/BiomizationSouthernEuropeElengaetal.xls
- supplement/Europe/SouthernEuropescores.xls
- supplement/Europe/Alps_scores.xls
- supplement/Europe/BiomizationNorthernEuropeTarasovaetal.xls
- supplement/Europe/NorthEuropeandEurasia_scores.xls
- cp-12-51-2016-supplement-title-page.pdf
