# Supplementary material for: Terrestrial biosphere changes over the last 120 kyr
Source: Copernicus journal article supplement (doi:10.5194/cp-12-51-2016), 2016-01-18
Supplement: Supplementary file 1 [file cp-12-51-2016-supplement.zip › cp-12-51-2016-supplement-title-page.pdf]

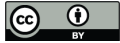

## *Supplement of*

# Terrestrial biosphere changes over the last 120 kyr

**B. A. A. Hoogakker et al.**

*Correspondence to:* B. A. A. Hoogakker (babetteh@earth.ox.ac.uk)

- cp-12-51-2016-supplement-title-page.pdf
- supplement
  - Africa
    - \* Africa\_scores.xls
    - \* BiomizationAfricaJollyetal1998.xls
  - Australasia
    - \* Asia\_Australiascores\_Pickettetal2004.xls
    - \* Baikal\_scores\_Tarasovetal.xls
    - \* BiomizationPickettetal2004.xls
    - \* BiomizationTarasovaetal.xls
    - \* JapanTakaharaetal1999.xls
    - \* Japan\_scores\_Takahashietal1999.xls
  - Europe
    - \* Alps\_scores.xls
    - \* BiomizationAlpsPrenticeetal.xls
    - \* BiomizationNorthernEuropeTarasovaetal.xls
    - \* BiomizationSouthernEuropeElengaetal.xls
    - \* NorthEuropeandEurasia\_scores.xls
    - \* SouthernEuropescores.xls
  - North\_America
    - \* BiomizationThompsonandAnderson2000.xls
    - \* BiomizationWilliamsetal2000.xls
    - \* NorthAmerica\_scores\_ThompsonandAnderson2000.xls
    - \* NorthAmerica\_scores\_Williamsetal2000.xls
  - SI\_1\_biome\_scores.pdf
  - SI\_2\_CO2\_sensitivity.pdf
  - South\_America

- \* BiomizationMarchantetal2009.xls
- \* LatinAmerica\_scores.xls

The copyright of individual parts of the supplement might differ from the CC-BY 3.0 licence.
