# Supplementary material for: Terrestrial biosphere changes over the last 120 kyr
Source: Copernicus journal article supplement (doi:10.5194/cp-12-51-2016), 2016-01-18
Supplement: Supplementary file 1 [file cp-12-51-2016-supplement.zip › supplement/Africa/Africa_scores.xls]

## Sheet: Albert-F
Sample	Sample age	Sample age	Sample age (min?) ka, assumed BP	Sample age (max?) ka, assumed BP	tropical forest	warm-temperate forest	savanna and dry woodland	grassland and dry shrubland	desert
5	455.405	494.392	0.455405	0.494392	16.1979	14.1833	9.45151	10.4999	1.20186
20	1821.62	1977.57	1.82162	1.97757	13.6932	11.718	8.47153	9.40187	0.617018
35	3187.84	3460.74	3.18784	3.46074	20.1472	16.1993	9.46568	10.7925	1.56068
60	5748.3	6366.38	5.7483	6.36638	25.1499	19.3727	8.19749	8.99131	1.0875
75	7299.36	8132.39	7.29936	8.13239	22.918	18.8889	6.59472	7.73345	0.367856
120	8536.88	9571.48	8.53688	9.57148	22.0797	19.0482	7.08567	6.92747	0.881546
180	9005	10130.5	9.005	10.1305	24.5528	21.5739	7.69724	7.26906	0.753778
220	9292.27	10544.6	9.29227	10.5446	23.184	19.722	7.67412	7.02488	0.362024
275	9687.27	11114	9.68727	11.114	26.8423	21.9984	8.08635	8.33908	0.739727
290	9795	11269.3	9.795	11.2693	22.3341	19.2187	7.33232	9.01229	0.51198
309	9931.45	11466	9.93145	11.466	11.7756	10.507	11.0595	14.3696	2.08321
324	10039.2	11621.3	10.0392	11.6213	13.9502	13.0681	10.6482	15.1423	1.30189
339	10146.9	11776.6	10.1469	11.7766	13.3375	11.0065	10.8956	14.2842	1.95426
354	10254.6	11931.9	10.2546	11.9319	15.2257	13.5306	12.0793	14.3326	1.3738
359	10290.5	11983.6	10.2905	11.9836	13.9801	12.92	11.1569	14.8026	1.42908
379	10434.2	12190.7	10.4342	12.1907	13.9039	12.9369	10.5326	13.9222	1.18077
389	10506	12294.2	10.506	12.2942	14.3212	14.0282	10.5247	13.6745	1.32842
399	10577.8	12397.7	10.5778	12.3977	16.2066	15.5121	10.1449	13.3457	1.46949
409	10649.6	12501.3	10.6496	12.5013	16.3882	14.9769	11.2292	13.4326	1.31685
429	10793.3	12708.3	10.7933	12.7083	15.1078	12.9999	11.2976	12.9256	1.51411
439	10865.1	12811.9	10.8651	12.8119	14.114	12.8831	12.4589	13.3593	1.05118
454	10972.8	12967.1	10.9728	12.9671	15.1812	12.8933	12.3654	13.419	1.83448
469	11087.7	13090.6	11.0877	13.0906	16.467	13.8364	12.0749	12.8891	0.929144
494	11280.2	13292.7	11.2802	13.2927	18.6148	15.051	11.8395	11.6716	1.45012
509	11395.6	13413.9	11.3956	13.4139	18.7782	16.1939	11.3546	11.7883	1.11959
539	11626.5	13656.3	11.6265	13.6563	22.9213	19.158	8.00384	10.5407	1.02869
559	11780.4	13817.9	11.7804	13.8179	21.4221	19.5575	7.05858	9.68766	0
599	12088.3	14141.2	12.0883	14.1412	20.7518	18.5761	6.50328	7.74476	0.519524
844	19240.1	22992.9	19.2401	22.9929	9.10177	8.61765	9.35131	10.8562	1.73792
854	19592.1	23432.5	19.5921	23.4325
864	19944	23872.2	19.944	23.8722	8.56667	6.18992	11.3535	12.1415	2.52881
874	21207.5	25235.8	21.2075	25.2357	6.24758	6.43158	7.51401	10.0508	1.66367
879	22295	26379.5	22.295	26.3795	9.54803	8.8802	9.41615	12.3565	2.31712
889	24892.3	29248.6	24.8923	29.2486	9.37108	9.20759	9.70472	12.2062	2.56942
904	29738.5	34861	29.7385	34.861	9.41319	7.14765	9.90205	11.9103	2.79273

## Sheet: Mubwindi MB3
Sample	Sample age	Sample age	Sample age (min?) ka, assumed BP	Sample age (max?) ka, assumed BP	tropical forest	warm-temperate forest	savanna and dry woodland	grassland and dry shrubland	desert
43	0	0	0	0	12.0975	9.23357	8.30761	16.0841	3.47102
78	0	0	0	0	15.1052	12.3623	8.50678	11.3337	2.95705
98	0	0	0	0	12.0376	7.32756	7.2722	9.53362	3.48707
143	0	0	0	0	10.1496	7.45166	6.72181	12.881	1.57083
179	746.846	905.317	0.746846	0.905317	6.80467	8.38755	4.94764	9.63859	3.24658
198	1669.08	1992.15	1.66908	1.99215	8.91911	4.75165	4.92047	9.58223	1.91343
233	3367.92	3994.22	3.36792	3.99422	12.7015	10.1883	6.45899	12.0182	5.72974
243	3853.31	4566.24	3.85331	4.56624	15.1365	12.906	8.55094	18.3175	3.58157
279	5600.69	6625.51	5.60069	6.62551	21.5575	16.3823	9.09	18.976	5.56524
298	6522.92	7712.35	6.52292	7.71235	17.9742	16.1215	9.25633	18.6317	4.06638
328	7979.08	9428.4	7.97908	9.4284	18.7981	14.3771	7.32726	15.4596	5.71001
353	9192.54	10858.5	9.19254	10.8585	17.658	13.4631	6.70692	14.9352	2.28369
379	10454.5	12345.7	10.4545	12.3457	16.735	12.887	7.03453	13.0875	4.66937
408	11862.2	14004.6	11.8622	14.0046	19.3786	15.9377	6.98949	15.1704	3.91367
423	12590.2	14862.6	12.5902	14.8626	17.3282	13.2341	9.00176	18.6317	3.54398
444	14526	17105.6	14.526	17.1056	12.1879	10.3058	7.10465	16.0779	2.97095
462	16578	19474.6	16.578	19.4746	12.1009	10.9803	10.5538	22.8455	6.17958
478	18402	21580.4	18.402	21.5804	8.98509	9.0247	8.95652	24.0837	3.32868
508	21822	25528.8	21.822	25.5288	9.75592	11.1665	6.48481	22.4649	3.45523
533	24672	28819.2	24.672	28.8192	6.6733	7.15299	4.25367	13.6964	3.46808
563	28092	32767.6	28.092	32.7676	12.6636	15.7219	5.96418	20.8509	5.01343
593	31512	36716	31.512	36.716	11.6542	14.2809	7.40925	19.497	6.01936
634	36186	42112.1	36.186	42.1121	9.68341	10.197	3.14784	8.6974	4.7835
675	40860	47508.3	40.86	47.5083	13.0819	12.3918	9.38757	18.2392	5.06347

## Sheet: Kamiranzovy 1
Sample	Sample age	Sample age	Sample age (min?) ka, assumed BP	Sample age (max?) ka, assumed BP	tropical forest	warm-temperate forest	savanna and dry woodland	grassland and dry shrubland	desert
0	12775	15080.4	12.775	15.0804	11.2434	13.0626	7.17007	10.0175	1.91758
25	13025	15350.9	13.025	15.3509	9.48197	12.3434	7.18698	11.9914	1.73483
50	13275	15621.4	13.275	15.6214	12.0196	15.5237	7.72234	9.91501	1.43109
75	13525	15891.9	13.525	15.8919	5.96339	9.20481	8.69303	12.4101	0.951303
100	13775	16162.4	13.775	16.1624	6.24865	9.21418	6.35838	11.794	0.907218
125	14025	16432.9	14.025	16.4329	6.7686	10.7417	7.7024	13.0314	2.37315
150	14275	16703.4	14.275	16.7034	10.1567	14.1707	6.97479	13.1599	1.75618
200	14775	17244.4	14.775	17.2444	9.3989	13.2599	8.02419	13.6044	1.40807
250	15275	17785.4	15.275	17.7854	8.71366	10.5384	9.02783	14.2554	1.65393
300	16229.5	18903.7	16.2295	18.9037	5.71489	9.76701	8.41175	18.8377	3.22758
350	17865.8	20887.9	17.8657	20.8879	9.02746	12.8595	8.35763	14.8217	1.06374
400	19502	22872.2	19.502	22.8722	12.0315	17.1279	7.77936	16.5624	1.43509
450	21138.2	24856.4	21.1382	24.8564	9.37015	13.1902	6.54899	16.3738	1.92996
500	22693.5	26700.2	22.6935	26.7002	8.48716	11.5934	6.96524	15.9	2.16856
550	24127.2	28333.2	24.1273	28.3332	8.34271	10.2022	8.65245	16.3877	2.20719
600	25561	29966.2	25.561	29.9662	8.07748	10.525	8.53931	17.1142	2.18691
650	26994.8	31599.2	26.9947	31.5992	8.87953	10.7278	9.34526	16.1563	1.55263
705	27982.5	32721.6	27.9825	32.7216	6.84338	11.6236	6.98225	19.5012	1.71763
750	28212	32978.4	28.212	32.9784	6.28772	11.1255	5.83359	18.0911	1.17077
800	28467	33263.6	28.467	33.2636	10.8737	14.4934	5.789	15.6601	0.438951
850	28722	33548.9	28.722	33.5489	7.39086	10.192	5.90252	16.9611	1.09875
900	29414.5	34313.1	29.4145	34.3131	6.11006	10.118	4.77136	14.1045	0.438108
950	30763.2	35795.9	30.7632	35.7959	5.30181	9.16144	3.11345	14.7468	0.6689
1000	32112	37278.6	32.112	37.2786	5.13501	7.73655	6.94653	16.6775	2.10728
1050	33460.8	38761.4	33.4607	38.7614	8.92163	9.62979	10.4293	13.7957	2.19368
1100	35016.7		35.0167		4.81043	5.9036	6.92526	12.4476	1.85238
1150	36883.3		36.8833		4.93082	7.27565	5.89444	9.42648	0.884748
1200	37963.1		37.9631		7.54709	12.4224	3.4018	8.39469	0.880451
1250	38518.3		38.5183		11.2461	15.155	6.06095	10.3729	1.98002
1280	38851.4		38.8514		6.18417	10.4053	5.40968	14.1363	1.3784
1300	39073.4		39.0734		6.11952	9.65997	6.04729	15.3494	1.54737
1320	39255.6		39.2556		4.32705	7.77736	5.77201	15.5532	0.435194
1350	39349		39.349		5.35712	7.60641	7.3991	11.2123	1.50369
1400	39504.7		39.5047		10.7262	15.3093	4.3326	8.30987	1.31437
1425	39582.6		39.5826		8.14757	14.156	4.33529	5.96521	0.934539
1450	39660.5		39.6605		8.87516	14.5038	5.03683	6.75758	0.449467
1475	39738.3		39.7383		7.20745	12.1383	5.01091	8.27881	0.646171
1500	39816.2		39.8162		8.25381	13.579	4.68514	10.948	0.804518
1525	39894.1		39.8941		5.75146	10.2842	4.28717	9.99719	1.44433
1550	39971.9		39.9719		8.55844	12.1643	5.44378	9.36527	1.19464

## Sheet: Rusaka
Sample	Sample age (Bonnefille 1995-A)	Sample age (Bonnefille 1995-A), ka, assumed BP	tropical forest	warm-temperate forest	savanna and dry woodland	grassland and dry shrubland	desert
55	796	0.796	15.0983	8.6269	10.5861	9.36332	1.97736
65	857	0.857	11.2609	5.43158	10.8305	8.53804	2.30192
75	918	0.918	12.7514	9.50898	11.153	12.3294	3.49985
85	979	0.979	15.3415	10.5083	10.1954	9.88308	3.33598
95	1040	1.04	25.8735	18.386	12.6871	13.6114	2.3761
105	1101	1.101	21.9419	20.8037	9.75015	10.3374	2.27218
115	1162	1.162	20.8711	16.8857	11.2714	10.8816	2.79554
125	1223	1.223	30.4605	25.5257	15.8538	13.6436	3.80097
134	1278	1.278	27.1781	25.3836	13.251	11.6692	2.66744
145	1345	1.345	23.8805	23.5126	12.8902	11.2409	4.09553
155	1406	1.406	20.342	19.5416	7.93093	8.41094	2.0091
165	1467	1.467	19.3802	20.4999	7.75404	9.50211	2.58881
175	1528	1.528	19.181	19.2983	9.65004	10.5632	2.60466
185	1589	1.589
195	1650	1.65	28.0315	22.6466	10.7925	9.37239	1.76471
205	1726	1.726
215	1802	1.802	20.8744	20.0064	10.0337	8.48397	2.16169
225	1878	1.878
235	1954	1.954	21.1368	18.4958	9.34122	9.62237	2.67886
245	2030	2.03
255	2106	2.106	22.6228	17.9138	9.45316	9.60389	2.08541
265	2182	2.182
275	2258	2.258	18.6733	17.7422	9.58949	9.14569	2.14286
285	2334	2.334
295	2410	2.41	21.4966	18.7993	7.94238	7.69733	2.04691
305	2560	2.56
315	2710	2.71	18.8056	18.4829	8.23532	8.96586	1.71625
325	2860	2.86
335	3010	3.01	24.6451	21.9549	9.42566	10.2488	2.35041
345	3160	3.16
355	3310	3.31
365	3460	3.46	26.1358	23.9582	9.7996	9.47037	2.13704
375	3610	3.61
385	3760	3.76	28.699	23.4036	9.38971	10.3973	1.78885
395	3910	3.91
405	4053	4.053
415	4196	4.196	20.897	22.3343	7.41089	9.36656	2.74432
425	4339	4.339
435	4482	4.482	24.4246	18.8749	7.68123	11.3475	2.64267
445	4625	4.625
455	4768	4.768
465	4911	4.911	24.7916	19.8471	9.43631	11.6816	3.74319
475	5054	5.054
485	5197	5.197	21.4359	18.2692	8.84527	10.4321	1.62507
495	5340	5.34
500	5464	5.464
505	5588	5.588	18.5812	17.3929	7.76685	8.35843	2.32004
510	5712	5.712
515	5836	5.836	27.5254	25.1648	9.86446	10.1512	2.14468
520	5960	5.96
525	6084	6.084
530	6208	6.208	20.1293	16.55	6.63978	6.80959	1.42014
535	6332	6.332
540	6456	6.456	19.8952	18.582	5.99081	7.12593	1.60904
545	6580	6.58
555	6666	6.666
565	6752	6.752	18.2667	20.0734	6.78244	7.42947	2.22207
575	6838	6.838
585	6924	6.924	16.1759	15.2001	5.73512	8.28397	2.17128
595	7010	7.01	18.1964	20.1491	5.89865	7.77729	2.08976
605	7088	7.088	16.6001	18.0326	7.95979	8.91917	2.81886
615	7166	7.166	14.9898	16.2802	6.19011	6.96052	1.63372
625	7244	7.244	13.8856	11.0899	6.11848	6.50802	2.43179
635	7322	7.322	13.5047	15.0389	6.38418	9.0072	2.38699
645	7400	7.4	13.9447	14.0277	6.39854	7.37763	1.62221
655	7478	7.478	15.2056	15.7492	5.31158	7.31064	1.51099
665	7556	7.556	13.1892	14.0037	5.28366	6.8773	1.54303
675	7634	7.634	15.8853	16.6095	5.48183	7.18025	1.67077
685	7712	7.712	27.407	27.0693	6.43529	7.8073	1.79029
695	7790	7.79	27.7543	28.5007	7.94833	8.55382	1.752
700	7856	7.856	24.5548	23.4867	7.19816	7.98339	1.16473
705	7921	7.921	24.7454	23.5208	8.40422	8.51032	1.74078
710	7986	7.986	21.7779	21.8756	8.07295	9.02123	3.65629
715	8052	8.052	22.1163	21.3215	6.86478	7.28833	1.64058
720	8118	8.118	21.155	19.651	5.87068	6.73643	1.56556
725	8183	8.183	16.96	16.8585	5.14392	6.86365	2.30397
730	8248	8.248	19.4332	20.2857	7.71804	7.28811	1.60866
735	8314	8.314	17.3241	17.5093	6.04881	8.34289	1.39347
740	8380	8.38	13.8391	13.4369	4.52389	5.95612	2.06082
745	8445	8.445	19.6467	19.2722	7.61267	9.50304	1.8147
750	8510	8.51	20.1316	17.0147	9.43925	10.2786	2.53799
755	8576	8.576	17.4723	17.9341	6.65382	8.23085	2.50264
760	8642	8.642	13.9425	15.1308	7.00794	7.16954	2.17797
765	8707	8.707	13.2675	15.2645	5.88782	8.13813	1.95553
770	8772	8.772	15.0577	15.504	8.30015	8.75866	1.87617
775	8838	8.838	18.2142	17.2653	7.35957	8.46004	1.90281
780	8904	8.904	16.8636	15.5813	7.34744	7.50214	1.79104
785	8969	8.969	11.2863	14.6796	5.88492	7.16149	2.10623
790	9034	9.034	14.1666	15.4332	7.08507	6.15194	1.70802
795	9100	9.1	11.9922	14.048	5.23144	7.59258	1.41421
800	9198	9.198	11.1607	13.6473	4.28913	5.96356	1.62726
805	9296	9.296	13.5572	14.2672	6.29642	9.48989	2.37729
810	9393	9.393	13.8683	14.7035	7.67929	9.8145	2.8319
814	9472	9.472	8.61126	10.5148	5.77481	7.12552	1.80172
820	9589	9.589	8.92138	8.79751	7.13238	8.40678	1.41589
825	9687	9.687	10.5908	13.3262	6.26014	7.9311	1.6037
830	9785	9.785	18.0749	19.8676	6.76164	11.2295	1.96116
835	9882	9.882	10.2078	12.2512	6.8097	9.03925	1.81997
840	9980	9.98	10.1797	11.0426	7.03633	9.35134	1.47342
845	10058	10.058	8.66452	10.3854	6.56059	10.0036	2.16757
850	10134	10.134	9.38787	9.54086	6.2963	7.42962	1.85185
855	10210	10.21	10.385	8.68317	7.87543	8.33802	2.02469
860	10285	10.285	7.27461	8.90821	6.90154	8.4733	2.08077
865	10361	10.361	7.78326	10.1	7.54489	9.58687	2.47648
870	10437	10.437	10.1483	10.4127	7.08117	9.06799	2.04236
875	10513	10.513	8.76987	9.92151	7.98532	10.8533	1.76526
880	10588	10.588	8.05597	8.45673	7.42073	8.47678	1.92807
885	10664	10.664	8.33023	9.64981	7.79301	9.27943	2.19385
890	10740	10.74	10.5099	12.6979	9.42437	12.3579	2.5736
895	10816	10.816	10.1129	12.3471	7.68307	10.7811	2.05376
900	10891	10.891	8.6318	11.8722	7.33726	11.2423	2.13285
902	10922	10.922	8.20488	11.2507	5.90031	8.46984	1.6989
905	10967	10.967	10.6777	13.7259	8.58477	11.0835	1.6957
907	10997	10.997	11.2963	10.941	6.37003	9.38376	1.38675
910	11043	11.043	9.10587	11.8448	9.30566	11.8172	2.04927
915	11119	11.119	8.91185	12.6605	5.75187	8.39636	1.76939
920	11194	11.194	9.52064	8.8589	8.08976	12.7778	2.64218
925	11270	11.27	7.62425	11.5533	8.75099	13.2832	3.65623
930	11346	11.346	9.24038	11.3549	8.81102	11.5386	2.86435
935	11422	11.422	6.26308	7.98718	9.1189	15.6746	3.9728
940	11497	11.497	12.2885	11.132	11.6895	15.7476	3.73415
945	11680	11.68	12.0423	11.0299	14.4476	17.1712	4.28882
950	11909	11.909	9.87016	8.53175	11.5694	13.6606	2.95052
955	12562	12.562	6.19518	7.09863	10.9132	15.0483	4.0356
960	13500	13.5	7.08947	6.68054	10.3664	14.4657	3.35777
965	14438	14.438	7.83702	7.06511	10.6542	14.9832	3.56224
970	15375	15.375	5.05399	3.01095	11.2488	14.5903	3.9163
975	16312	16.312	4.81582	3.48948	11.4842	13.8034	2.21128
980	17250	17.25	3.56504	2.38746	11.1526	14.5119	2.70103
985	18188	18.188
990	19125	19.125	5.39906	5.72872	12.636	14.7366	3.64396
995	20062	20.062
1005	22442	22.442	4.6211	3.71896	11.0651	13.0084	2.55229
1015	25326	25.326
1025	28210	28.21	1.48215	2.37203	11.3277	14.8137	3.65749
1035	31094	31.094
1045	33977	33.977	3.63199	4.05274	11.4737	12.625	2.44032
1065	39745	39.745
1075	42629	42.629	3.97444	2.68028	12.8759	16.7067	6.29963
1085	45513	45.513
1089	46666	46.666	6.1437	7.4161	12.441	16.473	5.33075

## Sheet: Kashiru 1
Sample	Sample age	Sample age	Sample age (min?) ka, assumed BP	Sample age (max?) ka, assumed BP	tropical forest	warm-temperate forest	savanna and dry woodland	grassland and dry shrubland	desert
3	0	0	0	0	6.38299	5.3249	8.1032	9.83566	1.8009
15	0	0	0	0	11.4316	10.0184	9.65693	12.2021	2.61137
25	0	0	0	0	12.7799	10.762	7.98101	12.2637	2.32776
33	171.937	199.368	0.171937	0.199368	12.7505	10.5148	9.27136	11.7002	2.30227
45	584.585	677.85	0.584585	0.67785	13.8044	13.0235	9.20138	12.7635	2.73576
52	825.296	956.964	0.825296	0.956964	10.3201	9.33255	7.93247	13.4376	2.62226
59	1066.01	1236.08	1.06601	1.23608	13.9583	13.1521	9.6355	16.8437	5.26439
65	1272.33	1475.32	1.27233	1.47532	12.263	11.9002	7.76872	9.76782	2.11741
70	1444.27	1674.69	1.44427	1.67469	12.2784	10.9339	6.8185	9.77367	2.6823
75	1616.21	1874.06	1.61621	1.87406	9.20666	9.31405	6.57945	9.63525	2.78499
80	1788.14	2073.42	1.78814	2.07342	13.0563	13.1039	8.07644	9.96799	2.85584
85	1960.08	2272.79	1.96008	2.27279	13.4407	15.5287	7.43726	11.2908	3.0303
90	2132.02	2472.16	2.13202	2.47216	11.0121	12.4016	6.74303	10.5546	2.27648
95	2303.95	2671.53	2.30395	2.67153	9.15105	10.2316	6.44997	10.9417	3.0697
102	2544.66	2950.64	2.54466	2.95064	9.56855	10.2914	8.5241	11.856	2.61237
109	2785.38	3229.75	2.78538	3.22975	9.66739	9.65262	6.79218	10.455	1.92318
115	2991.7	3469	2.9917	3.469	8.51427	9.88762	5.43459	11.1073	2.79348
121	3198.02	3708.24	3.19802	3.70824	9.59984	11.3455	7.55512	12.2423	3.15707
125	3335.57	3867.73	3.33557	3.86773	8.64971	9.48111	5.07649	9.13804	2.76866
131	3541.9	4106.97	3.5419	4.10697	11.3495	11.8763	7.0757	11.1791	3.02961
135	3679.45	4266.47	3.67945	4.26647	11.7567	13.8004	6.87041	13.217	2.61534
141	3885.77	4505.71	3.88577	4.50571	12.0209	15.6099	6.94473	12.2954	3.06214
145	4023.32	4665.2	4.02332	4.6652	15.4394	16.2438	9.58226	15.4477	3.85456
152	4264.03	4944.32	4.26403	4.94432	13.3333	12.0224	6.23301	11.7432	2.0454
160	4401.67	5100.17	4.40167	5.10017	12.8453	12.7703	5.95544	11.4376	1.86373
162	4420.46	5120.6	4.42046	5.1206	14.2915	13.4737	7.53221	12.8988	3.33183
165	4448.65	5151.24	4.44865	5.15124	12.9872	11.1139	5.91405	11.2217	2.63109
170	4495.62	5202.31	4.49562	5.20231	17.0642	16.5463	5.1348	10.4699	1.75682
175	4542.59	5253.37	4.54259	5.25337	10.3179	10.0306	3.90308	7.85463	1.47643
181	4598.96	5314.65	4.59896	5.31465	12.8603	14.5284	7.47803	11.5722	1.78174
185	4636.54	5355.5	4.63654	5.3555	13.2574	13.077	9.91524	13.8185	3.07962
195	4730.49	5457.64	4.73049	5.45764	13.6935	13.3043	6.17937	10.0791	1.50548
202	4796.25	5529.13	4.79625	5.52913	12.8862	12.4373	6.41134	11.4566	1.78065
215	4918.39	5661.9	4.91839	5.6619	15.609	16.2327	7.01025	12.0026	1.27573
225	5012.33	5764.03	5.01233	5.76403	11.7894	11.9838	5.98837	10.4121	0.969003
235	5106.28	5866.17	5.10628	5.86617	12.595	12.7133	5.88049	11.6203	2.15766
245	5200.23	5968.3	5.20023	5.9683	17.264	17.3245	8.30587	13.9695	2.14176
252	5265.99	6039.79	5.26599	6.03979	11.6818	11.8112	5.39078	8.24654	1.10163
265	5388.13	6172.56	5.38813	6.17256	18.472	16.8618	10.0869	14.497	2.43432
275	5482.07	6274.7	5.48207	6.2747	15.1359	16.698	6.51237	13.5889	1.96212
287	5594.81	6397.26	5.59481	6.39726	10.455	13.6274	5.14572	10.5207	1.56696
295	5669.97	6478.96	5.66997	6.47896	14.6262	15.7759	7.47551	13.3778	2.51426
302	5735.73	6550.46	5.73573	6.55046	11.008	11.0292	6.25714	10.9805	2.17391
315	5857.87	6683.23	5.85787	6.68323	18.9532	18.5642	7.89647	13.0697	2.34747
325	5951.82	6785.36	5.95182	6.78536	10.2654	10.4457	5.77134	9.58843	2.80487
334	6107.06	6949.5	6.10706	6.9495	13.1481	10.1884	5.08198	7.58154	1.3904
338	6191.76	7038.5	6.19176	7.0385	11.1477	10.4722	5.40884	9.92975	2.58356
340	6234.12	7083	6.23412	7.083	11.8643	10.6293	4.66838	9.39373	1.75231
343	6297.65	7149.75	6.29765	7.14975	11.4537	9.55295	5.95587	10.5658	2.42728
345	6340	7194.25	6.34	7.19425	15.7122	15.5758	7.71184	11.4508	2.17332
348	6403.53	7261	6.40353	7.261	10.3835	9.90378	5.58555	9.49839	2.14546
350	6445.88	7305.5	6.44588	7.3055	10.7266	9.82161	5.80306	9.9078	2.65333
353	6509.41	7372.25	6.50941	7.37225	11.6353	10.9381	6.46461	11.9409	3.27531
355	6551.76	7416.75	6.55176	7.41675	7.91286	9.11413	5.29537	10.5942	2.67883
359	6636.47	7505.75	6.63647	7.50575	10.2704	8.71114	5.28822	8.79777	2.41352
361	6678.82	7550.25	6.67882	7.55025	13.6369	10.3556	5.79215	10.5892	2.64447
363	6831	7734.84	6.831	7.73484	11.3735	10.3101	4.7005	8.75953	1.67705
365	7093	8059.52	7.093	8.05952	8.97777	10.3385	5.79194	13.1576	2.53976
369	7617	8708.88	7.617	8.70888	15.9626	14.4919	8.01136	13.9324	2.00731
371	7879	9033.56	7.879	9.03356	13.5297	14.479	5.86031	12.3231	1.67384
373	8141	9358.24	8.141	9.35824	15.9673	15.1499	6.43724	10.7853	1.11903
375	8403	9682.92	8.403	9.68292	15.7178	13.5203	8.1362	16.8887	6.51778
379	8927	10332.3	8.927	10.3323	14.0181	11.6652	7.78221	16.3236	7.26586
381	9189	10657	9.189	10.657	12.7017	9.78324	5.04179	9.04958	1.51446
383	9451	10981.6	9.451	10.9816	14.651	14.2668	5.89817	10.5141	1.87317
385	9713	11306.3	9.713	11.3063	18.5691	15.1382	7.66774	12.8646	2.13713
389	10237	11955.7	10.237	11.9557	19.6236	19.3188	7.05283	12.182	1.66667
391	10499	12280.4	10.499	12.2804	10.1454	12.4971	7.35845	13.4076	3.26781
393	10761	12605	10.761	12.605	10.4887	8.88232	7.02462	11.1446	2.25956
395	11023	12929.7	11.023	12.9297	7.23092	8.02828	7.59774	13.2726	2.56162
398	11416	13416.7	11.416	13.4167	4.61161	5.12048	7.83893	13.0077	3.64521
401	11809	13903.8	11.809	13.9038	7.44055	7.84078	7.51401	11.2656	1.14534
403	12071	14228.4	12.071	14.2284	8.56362	8.36256	8.03404	16.345	3.77304
405	12333	14553.1	12.333	14.5531
408	12726	15040.1	12.726	15.0401	7.30303	8.6345	8.18892	12.3022	1.72936
410	12988	15364.8	12.988	15.3648
411	13119	15527.2	13.119	15.5272	4.33966	4.98842	7.49351	11.7376	1.64796
415	13380	15873.1	13.38	15.8731
420	13596.7	16179	13.5967	16.179	3.05556	3.18853	6.50974	12.9176	1.81592
425	13813.3	16485	13.8133	16.485
431	14073.3	16852.1	14.0733	16.8521	4.14984	4.55823	6.93793	10.3699	1.33819
435	14246.7	17096.8	14.2467	17.0968
441	14506.7	17464	14.5067	17.464	3.98746	4.22025	8.40345	11.6248	2.68847
445	14680	17708.7	14.68	17.7087
455	15113.3	18320.6	15.1133	18.3206	7.057	5.98279	10.318	16.0523	4.31252
465	15619.9	18904.8	15.6199	18.9048
475	16144.7	19482.1	16.1447	19.4821	7.0359	7.09136	10.8641	16.439	2.80297
485	16669.5	20059.5	16.6695	20.0595
495	17194.3	20636.8	17.1943	20.6368	6.89418	7.09463	10.8778	17.8237	4.16243
505	17719.1	21214.1	17.7191	21.2141
515	18244	21791.4	18.244	21.7914	7.12638	6.83335	11.5613	18.968	3.95261
525	18768.8	22368.7	18.7688	22.3687
535	19225	22865	19.225	22.865	5.85	5.65651	8.31599	16.5473	3.01437
545	19658.3	23334.3	19.6583	23.3343
555	20091.7	23803.7	20.0917	23.8037	10.1376	8.64968	8.57531	15.5797	2.87341
565	20525	24273	20.525	24.273
575	20958.3	24742.3	20.9583	24.7423	2.51833	3.29878	7.98968	13.7339	1.75588
581	21218.3	25023.9	21.2183	25.0239	9.34737	7.14737	8.71459	13.9473	3.02423
585	21391.7	25211.7	21.3917	25.2117	11.1659	13.8566	6.74506	10.1714	1.56941
591	21658.2	25510.6	21.6582	25.5106	9.57295	6.27805	9.31124	13.3496	3.81838
595	21839	25718.2	21.839	25.7182	12.4053	8.00514	8.57273	14.3921	3.87384
605	22291	26237	22.291	26.237	11.7285	8.83552	7.04437	15.2318	4.64119
615	22742.9	26755.9	22.7429	26.7559	14.8757	12.4972	6.68125	12.3466	1.223
625	23194.9	27274.8	23.1949	27.2748	12.4892	6.23936	9.35543	15.2802	1.15728
635	23646.9	27793.6	23.6469	27.7936	4.50604	3.99047	8.61942	14.4732	1.97066
645	24098.9	28312.5	24.0989	28.3125	4.65231	5.84568	8.48319	13.1218	2.02204
655	24550.8	28831.4	24.5508	28.8314	7.64083	7.22279	9.54086	16.5804	3.12648
665	25002.8	29350.2	25.0028	29.3502	5.71685	5.10172	8.5174	14.4866	3.11664
685	26055.2	30535.8	26.0552	30.5358	4.61801	4.86394	8.58774	13.6538	2.66621
695	26672.1	31218.9	26.6721	31.2189	6.29844	5.92916	8.35719	13.8876	2.70067
705	27289	31902	27.289	31.902	6.98845	6.5872	8.88817	14.5488	3.44647
715	27905.8	32585.2	27.9058	32.5852	6.65255	7.61563	10.717	18.7154	4.03785
725	28522.7	33268.3	28.5227	33.2683	9.05658	8.11603	11.1006	17.8066	3.61937
735	29139.6	33951.4	29.1396	33.9514	5.80246	5.05733	10.604	14.7669	1.86143
745	29756.5	34634.5	29.7565	34.6345	5.77251	6.8831	11.7648	17.6236	3.68511
755	30373.4	35317.6	30.3734	35.3176	5.54037	5.35027	9.53807	16.5884	2.57103
765	30990.3	36000.7	30.9903	36.0007	8.95925	8.80678	9.09307	16.3201	2.08544
775	31607.1	36683.9	31.6071	36.6839	11.2807	13.1558	11.0089	18.9287	3.05439
785	32224	37367	32.224	37.367	10.4176	13.1796	7.70754	11.8934	1.91507
795	32840.9	38050.1	32.8409	38.0501	3.37624	5.83496	9.04616	15.8093	1.65462
805	33457.8	38733.2	33.4578	38.7332	8.27763	7.66096	10.3833	18.7686	2.31636
815	34074.7	39416.3	34.0747	39.4163	6.28363	8.0422	8.40093	15.9481	2.59435
825	34691.6	40099.4	34.6916	40.0994	7.59079	10.4187	6.73819	17.3773	2.20198

## Sheet: kashiru 3
Sample	Sample age	Sample age	Sample age (min?) ka, assumed BP	Sample age (max?) ka, assumed BP	tropical forest	warm-temperate forest	savanna and dry woodland	grassland and dry shrubland	desert
75	616.972	1191.58	0.616972	1.19158	16.7329	17.7402	6.74728	13.6065	1.97952
95	1769.27	2374.7	1.76927	2.3747	14.4846	14.3054	4.80142	8.85685	1.33087
115	2921.56	3557.82	2.92156	3.55782	21.1014	18.1604	7.05828	14.0066	1.57803
135	4073.85	4740.94	4.07385	4.74094	20.0868	19.3429	7.22178	14.4475	1.43195
155	5226.15	5924.06	5.22615	5.92406	15.435	14.423	5.0405	11.267	1.38542
175	6378.44	7107.18	6.37844	7.10718	18.2989	14.4934	5.59852	11.6414	1.77868
195	7530.73	8290.3	7.53073	8.2903	18.3853	17.5468	6.29925	12.5231	1.56941
215	7916.04	8741.31	7.91604	8.74131	14.5681	17.3221	7.28922	12.3177	2.05264
225	7997.36	8860.54	7.99736	8.86054	15.3825	13.1331	7.06434	13.6084	1.46516
235	8078.68	8979.77	8.07868	8.97977	11.7431	13.7621	6.51538	13.4183	2.43408
240	8119.34	9039.38	8.11934	9.03938	15.3647	16.6189	5.83348	12.0335	1.52362
245	8160	9099	8.16	9.099	11.6455	13.1369	5.94811	12.8501	2.0595
250	8269.36	9241.16	8.26936	9.24116	13.8924	14.1125	5.41099	12.315	1.7776
255	8378.71	9383.33	8.37871	9.38333	14.1934	13.8263	5.81689	13.1051	2.57366
260	8488.07	9525.49	8.48807	9.52549	15.7095	16.3178	7.25559	12.879	1.76054
265	8597.43	9667.66	8.59743	9.66766	13.7941	14.3479	6.49996	13.523	1.83319
270	8706.78	9809.82	8.70678	9.80982	13.2368	14.7819	5.72068	12.3563	2.08927
275	8816.14	9951.98	8.81614	9.95198	12.3886	12.9766	9.35045	14.8566	2.41001
280	8925.5	10094.1	8.9255	10.0941	10.8526	12.7857	7.19401	16.0146	3.0119
285	9034.85	10236.3	9.03485	10.2363	12.5545	14.8378	7.79876	17.1219	3.05612
289	9122.34	10350	9.12234	10.35	10.8891	12.0941	6.38368	14.2423	3.21958
295	9253.57	10520.6	9.25357	10.5206	10.8269	10.9779	6.95045	13.8766	2.36528
300	9362.92	10662.8	9.36292	10.6628	10.5106	9.9458	7.28911	14.7231	2.55471
305	9472.28	10805	9.47228	10.805	8.41935	10.2597	7.95941	17.7888	2.111
309	9559.77	10918.7	9.55977	10.9187	7.40232	8.87976	8.02779	18.8727	2.67787
315	9690.99	11089.3	9.69099	11.0893	6.19256	9.37163	8.39755	18.0099	2.39143
320	9800.35	11231.5	9.80035	11.2315	7.5903	8.63495	10.5485	19.2725	3.40993
325	9909.71	11373.6	9.90971	11.3736	8.06613	9.97357	8.21397	19.1607	3.88593
330	10019.1	11515.8	10.0191	11.5158	5.88337	8.47817	8.06711	18.1537	2.91033
335	10662.8	12308.8	10.6628	12.3088	3.55057	4.82479	10.438	16.3188	3.48295
355	13475.2	15770.2	13.4752	15.7702	4.68105	5.10272	9.17428	14.216	2.20694
375	16287.6	19231.6	16.2876	19.2316	2.42372	3.61301	8.35044	15.8482	3.13068
395	19100	22693	19.1	22.693	2.58493	5.71563	8.50117	17.8833	2.32358
415	20260	23979	20.26	23.979	3.1903	5.68186	8.05635	21.5432	3.01532
435	21420	25265	21.42	25.265	4.9414	7.34001	10.0908	22.1468	2.731
455	22740	26747.7	22.74	26.7477	4.12392	5.88458	10.5978	22.7156	3.39489
475	24220	28427.1	24.22	28.4271	7.5594	9.95511	10.2474	21.2616	2.57485
495	25700	30106.5	25.7	30.1065	3.52973	5.80184	10.4383	22.0624	3.71103
515	27180	31785.9	27.18	31.7859	5.26567	5.21523	11.8806	21.0005	3.08249
555	30140	35144.7	30.14	35.1447	9.05437	7.92277	7.31656	15.667	1.82336
575	31620	36824.1	31.62	36.8241	8.29099	9.95407	4.01079	13.8786	2.66306
595	33100	38503.5	33.1	38.5035	15.2295	16.9091	6.05875	11.2477	1.57949
615	34580	40182.9	34.58	40.1829	13.6976	13.951	5.86821	11.8387	2.13416
635	36060	41862.3	36.06	41.8623	12.3111	13.3738	4.55541	7.29053	1.32033
655	37540	43541.7	37.54	43.5417	9.66696	10.802	3.86247	7.586	1.01731
675	39020	45221.1	39.02	45.2211	10.4985	11.1798	5.0898	9.31643	1.52351
695	40500	46900.5	40.5	46.9005	7.91699	8.24967	4.92358	5.06138	0.750939

## Sheet: Uluguru DevaDeva
Sample Depth	Age	Age, ka, assumed BP	tropical forest	warm-temperate forest	savanna and dry woodland	grassland and dry shrubland	desert
5	-805.05	-0.80505	3.20711	2.65027	7.01764	9.78167	0
10	-531.3	-0.5313	3.29547	2.09681	8.47407	9.25974	0
15	-257.55	-0.25755	4.70504	3.87521	7.87072	12.2134	0.551737
20	16.2	0.0162	4.79435	2.96623	10.2392	12.731	0.959564
25	289.95	0.28995	3.71226	3.3341	8.20318	12.0447	0.401286
30	563.7	0.5637	2.69282	3.62264	8.13563	12.2726	0.8
35	837.45	0.83745	4.65086	4.82013	8.10379	11.1193	0
40	1128.9	1.1289	2.90541	3.77903	8.71505	12.4694	0.890871
45	1490.8	1.4908	3.67279	4.89826	8.55116	13.3254	1.4429
50	1852.7	1.8527	3.62308	3.5302	8.72848	13.0898	1.4707
55	2214.6	2.2146	4.99388	5.04381	8.17832	12.486	1.28339
60	2576.5	2.5765	2.58531	3.84465	7.85877	10.8991	0.776736
65	2938.4	2.9384	3.74451	4.14107	7.33799	11.0549	0.57213
70	3300.3	3.3003	3.65456	4.79694	8.30404	12.2771	1.53753
75	3662.2	3.6622
80	3979.86	3.97986	2.68822	2.74705	6.61406	10.5475	1.34067
85	4194.35	4.19435
90	4408.83	4.40883	1.75471	1.86993	7.41101	8.92079	2.3916
95	4623.31	4.62331
100	4837.8	4.8378	2.33436	2.75506	7.28736	10.0586	1.16335
105	5052.28	5.05228
110	5266.77	5.26677	3.10149	3.77376	7.73066	9.67304	0
115	5481.26	5.48125
120	5695.74	5.69574	2.2092	2.65147	7.80462	10.3932	0.403567
125	5910.23	5.91023
130	6124.71	6.12471	1.78421	3.58795	8.61989	14.0909	1.05745
135	6339.19	6.3392
140	6553.68	6.55368	0.978289	3.07101	8.79815	12.3347	0.573068
145	7866.05	7.86605
150	9649.5	9.6495	2.72019	4.42659	8.17799	12.0328	0.614202
155	11432.9	11.4329
160	13216.4	13.2164	1.05915	4.63691	8.19373	10.7996	0.40032
165	14999.8	14.9998
170	16783.3	16.7833	1.65718	3.6974	8.1381	10.9072	0
175	18566.8	18.5667
180	20350.2	20.3502	1.97642	2.73382	9.58042	10.93	0.395285
185	22133.6	22.1336
190	23917.1	23.9171	2.72743	4.56283	7.95914	13.7787	1.77013
195	25700.6	25.7006
200	27484	27.484	0.936192	3.99872	7.77605	13.8139	1.45095
205	29267.4	29.2674
210	31050.9	31.0509	1.53137	4.10795	6.78823	13.1434	0.8
215	32834.4	32.8344
220	34617.8	34.6178	2.59068	4.37458	8.24431	13.8001	0.807792
225	36401.2	36.4012
230	38184.7	38.1847	0.4	2.95407	7.53658	12.5672	0.565685
235	39968.1	39.9681
240	41751.6	41.7516	1.61427	3.92754	7.45235	13.1466	1.06774
245	43535.1	43.5351
250	45318.5	45.3185	1.54081	3.47754	8.4844	13.4665	0.451294
255	47101.9	47.1019
260	48885.4	48.8854	1.98263	3.43267	8.26417	14.2996	0.686803
265	50668.9	50.6689
270	52452.3	52.4523	0.96261	3.69614	7.16533	10.4953	0
275	54235.8	54.2358
280	56019.2	56.0192	1.70538	3.17757	7.199	11.141	0
285	57802.6	57.8026
290	59586.1	59.5861	1.92405	4.41293	9.0391	14.9713	0.955048
295	61369.6	61.3696
300	63153	63.153	2.86776	3.58186	8.16013	14.9741	0.940389
305	64936.4	64.9364
310	66719.9	66.7199	1.20972	3.50431	8.03448	12.1461	0.570266
315	68503.4	68.5034
320	70286.8	70.2868	2.05032	5.3217	6.96932	9.94261	0.563436
325	72070.2	72.0703
330	73853.7	73.8537	2.39617	5.48961	7.35303	10.7806	0.399362
335	75637.1	75.6371	2.53475	4.31588	8.36742	13.3211	0.958807

## Sheet: Tritrivakely
Sample	Sample age	Sample age	Sample age (min?) ka, assumed BP	Sample age (max?) ka, assumed BP	tropical forest	warm-temperate forest	savanna and dry woodland	grassland and dry shrubland	desert
0	0	0	0	0	7.53566	9.22934	8.00753	14.1162	1.30744
7	0	0	0	0	7.64424	8.99237	8.72228	12.5336	1.2143
18.6	81.792	85.3488	0.081792	0.0853488	6.65177	7.09304	8.33261	10.1769	1.13908
30.2	345.344	360.362	0.345344	0.360362	9.21678	9.13756	5.42417	8.40901	0.923514
41.9	611.168	637.745	0.611168	0.637745	12.7288	11.2313	8.66643	10.4724	1.42975
53.5	874.72	912.758	0.87472	0.912758	14.2504	10.4203	8.15623	12.3523	1.48366
65.1	1138.27	1187.77	1.13827	1.18777	12.7962	10.872	7.9346	13.0931	1.8334
76.7	1401.82	1462.78	1.40182	1.46278	17.8686	15.7465	10.24	13.7409	1.08589
88.4	1667.65	1740.17	1.66765	1.74017	13.5784	13.1255	8.5246	13.8576	1.34578
100	1931.2	2015.18	1.9312	2.01518	17.437	13.4874	10.0833	13.2137	1.8009
110.3	2165.22	2259.37	2.16522	2.25937	10.7712	10.8587	6.04364	10.1786	0.933859
120.5	2396.96	2501.19	2.39696	2.50119	15.4884	11.8505	8.37959	12.3021	1.24836
130.8	2630.98	2745.39	2.63098	2.74539	13.8576	12.103	8.4795	13.103	0.501886
141	2849.09	2975.96	2.84909	2.97596	13.6646	11.3552	7.15274	11.2704	0.816497
151.3	2942.73	3104.3	2.94273	3.1043	12.5907	11.8596	10.6824	15.0359	0.499376
161.5	3035.45	3231.4	3.03545	3.2314	9.84207	9.68735	8.83346	12.1225	0.688428
171.8	3129.09	3359.75	3.12909	3.35975
182.1	3222.73	3488.09	3.22273	3.48809	9.09752	8.47581	7.99827	12.0278	1.00331
192.3	3315.45	3615.19	3.31545	3.61519
199.5	3380.91	3704.91	3.38091	3.70491	10.0832	9.14422	9.85635	12.2428	1.16686
200	3385.45	3711.14	3.38545	3.71114
210.9	3484.55	3846.96	3.48455	3.84696	10.3479	10.1309	9.99961	14.4755	1.67566
221.7	3582.73	3981.53	3.58273	3.98153
232.6	3681.82	4117.35	3.68182	4.11735	7.36032	8.40861	7.73883	10.2426	1.04828
243.5	3780.91	4253.17	3.78091	4.25317
254.3	3879.09	4387.75	3.87909	4.38775	6.72059	6.87485	6.92497	10.9028	1.43892
265.2	3978.18	4523.57	3.97818	4.52357
276.1	4077.27	4659.39	4.07727	4.65939	6.58025	5.96245	6.67215	8.77466	1.30853
287	4176.36	4795.21	4.17636	4.79521
297.8	4274.55	4929.78	4.27455	4.92978	7.91131	6.75111	6.74283	8.93281	1.17218
300	4294.55	4957.2	4.29455	4.9572
311.4	4696.57	5413.1	4.69657	5.4131	6.13424	6.20764	5.88145	10.2241	2.00187
322.7	5326.14	6108.05	5.32614	6.10805	6.37598	5.90193	6.27139	10.38	2.07528
334.1	5961.29	6809.15	5.96129	6.80915	7.75016	6.97271	5.79078	12.0212	2.32325
345.5	7483.5	8408.12	7.4835	8.40813	6.27298	6.40045	6.91937	10.85	2.32953
346.5	7700.5	8632.88	7.7005	8.63288	6.3267	6.34089	7.57432	13.2961	2.88543
346.9	7787.3	8722.77	7.7873	8.72277	5.80766	5.78423	6.8757	11.2682	2.599
348.9	8221.3	9172.27	8.2213	9.17227	6.65139	6.3777	7.30495	11.8702	2.5055
350.9	8593.14	9592.98	8.59314	9.59298	7.12902	5.02437	6.69228	11.6399	2.24685
352.9	8889	9978.5	8.889	9.9785	5.85027	5.79883	5.98847	12.7771	2.35585
354.9	9184.86	10364	9.18486	10.364	4.76772	5.61388	5.98411	11.4463	2.36807
356.8	9465.93	10730.3	9.46593	10.7303	7.44615	5.86587	5.9554	12.7353	2.76414
358.3	9687.83	11019.4	9.68783	11.0194	4.70658	4.75535	5.74296	11.6757	2.36381
360.3	9983.69	11404.9	9.98369	11.4049	6.46079	5.01133	6.67647	11.9162	3.06305
362.3	10279.5	11790.4	10.2795	11.7904	6.06479	5.36593	7.65395	12.917	3.20156
363.3	10427.5	11983.2	10.4275	11.9832	5.97832	6.04221	7.8286	13.228	2.33858
364.2	10560.6	12156.7	10.5606	12.1567	5.71798	6.33831	6.07527	11.4998	2.85103
365.1	10693.8	12330.2	10.6938	12.3302	6.49943	6.59476	7.56989	12.6449	2.41366
367	10974.8	12696.4	10.9748	12.6964	7.49026	6.71214	7.04124	13.0803	3.17177
368.1	11137.6	12908.4	11.1376	12.9084
369.6	11359.4	13197.6	11.3594	13.1976	7.47292	6.75165	8.23521	13.6165	2.61177
370.6	11507.4	13390.3	11.5074	13.3903
371.6	11655.3	13583.1	11.6553	13.5831	6.96791	6.54012	7.19528	13.6614	2.33105
372.6	11803.2	13775.8	11.8032	13.7758
373.6	11951.2	13968.6	11.9512	13.9686	4.59417	4.47563	4.74633	10.8456	2.15917
374.6	12099.1	14161.4	12.0991	14.1614
375.6	12247	14354.1	12.247	14.3541	7.77545	7.97396	8.05736	14.7091	1.97283
376.6	12395	14546.9	12.395	14.5469
377.6	12542.9	14739.6	12.5429	14.7396	8.28835	7.96677	8.57448	15.8111	2.15773
380	12820.3	15111.1	12.8203	15.1111
380.3	12841.4	15141.6	12.8414	15.1416	6.10893	7.42389	5.55386	13.675	1.20038
381.3	12911.7	15243.2	12.9117	15.2432
382.3	12982	15344.8	12.982	15.3448	6.84833	7.90874	6.84255	15.0103	1.4861
383.48	13065	15464.7	13.065	15.4647
384.62	13145.1	15580.5	13.1451	15.5805	4.47957	6.10331	5.50003	14.0885	1.22743
385.75	13224.5	15695.3	13.2245	15.6953
386.89	13304.7	15811.2	13.3047	15.8112	7.28823	7.75825	5.95257	15.1203	1.4631
388.02	13384.1	15926	13.3841	15.926
389	13453	16025.6	13.453	16.0256	7.76056	8.23956	7.04351	15.5905	0.883883
390.3	13544.4	16157.6	13.5444	16.1576
390.9	13586.6	16218.6	13.5866	16.2186	6.89003	7.78565	5.21065	14.8052	1.29236
391.5	13628.8	16279.6	13.6288	16.2796
392	13663.9	16330.4	13.6639	16.3304	6.95667	6.24634	6.06551	13.2945	2.2932
395.5	13910	16686	13.91	16.686
396.5	13980.3	16787.6	13.9803	16.7876	7.02184	6.28179	6.02396	13.3739	1.90697
397.5	14050.6	16889.2	14.0506	16.8892
398.5	14120.9	16990.8	14.1209	16.9908	8.37327	7.4463	8.27422	13.7724	2.28892
399.5	14191.2	17092.4	14.1912	17.0924
400.5	14261.5	17194	14.2615	17.194	6.86637	7.85922	6.44674	14.6406	1.52422
402	14367	17346.4	14.367	17.3464
412	15070	18362.5	15.07	18.3625	4.28144	4.49364	4.43848	14.0433	0.863868
422	15881.8	19231.1	15.8818	19.2311	3.94074	5.04123	4.28532	15.3169	0.720438
432	16693.5	20099.8	16.6935	20.0998	3.72774	5.32381	3.79717	13.7129	0.705931
442	17505.3	20968.4	17.5053	20.9684	2.49839	3.61909	3.15037	13.4181	0.731762
452	18317.1	21837	18.3171	21.837	3.22777	5.26196	5.04773	13.89	0.479463
462	19128.8	22705.6	19.1288	22.7056	2.72514	4.75304	4.21777	13.5595	0.849719
472	19706.6	23354.2	19.7066	23.3542	2.3492	3.28889	3.09276	13.7226	2.63372
482	20258.3	23978.3	20.2583	23.9783	3.16731	4.39822	3.97838	11.5771	1.23091
491	20754.8	24539.9	20.7548	24.5399	2.84565	3.37124	5.42647	14.9799	2.65946
492	20810	24602.3	20.81	24.6023	7.58174	7.58174	7.08171	15.2749	1.92759
502.8	21405.9	25276.3	21.4059	25.2763	3.84527	4.23511	3.85745	10.0084	1.40559
513.6	22001.7	25950.3	22.0017	25.9503	2.13871	2.96989	2.9091	9.68364	1.49842
524.4	22597.6	26624.4	22.5976	26.6244	3.07403	3.62346	2.52327	11.1834	1.79732
535.2	23193.4	27298.4	23.1934	27.2984	3.36423	4.12525	3.25762	10.7813	1.16248
546.1	23794.8	27978.6	23.7948	27.9786	3.41175	4.11836	1.89599	10.9663	1.6169
567.7	24426.2	28693.2	24.4262	28.6932	2.95829	2.82547	2.47841	9.75647	1.402
578.5	24680.2	28980.7	24.6802	28.9807	2.11003	2.83408	3.29407	10.0759	1.56272
589.3	24934.2	29268.2	24.9342	29.2682	4.6408	4.26213	3.69527	10.4317	1.17179
592	24997.7	29340.1	24.9977	29.3401	4.13475	2.7142	3.79926	10.677	1.70728
603	25256.4	29632.9	25.2564	29.6329	2.60591	3.40891	3.54459	12.7442	2.48069
613	25491.5	29899.1	25.4915	29.8991	2.76638	2.56776	3.41386	15.5367	3.63137
623	25726.7	30165.3	25.7267	30.1653	5.68159	6.46606	5.66351	12.5636	1.35873
633	25961.9	30431.5	25.9619	30.4315	4.25307	5.05889	3.41882	13.1212	1.88982
643	26197	30697.7	26.197	30.6977	3.67156	5.59916	5.60108	16.1981	2.18218
663	26667.4	31230.2	26.6674	31.2302	2.91224	4.23872	3.33822	14.8009	2.23279
673	26902.5	31496.4	26.9025	31.4964	3.65058	4.27316	4.5978	15.9493	2.71373
683	27137.7	31762.6	27.1377	31.7626	5.28588	5.71368	3.81368	15.2067	1.78885
691	27325.8	31975.5	27.3258	31.9755	3.33373	4.50254	4.1378	15.4813	2.02444
692	27349.3	32002.2	27.3493	32.0022	3.75519	5.22009	3.93073	13.6082	1.96537
702.5	27596.3	32281.7	27.5963	32.2817	5.3634	5.96102	6.61623	16.7285	2.60494
713.1	27845.5	32563.9	27.8455	32.5639	5.39949	6.07446	5.952	17.8697	2.81543
723.6	28092.5	32843.4	28.0925	32.8434	4.83353	6.41138	3.47685	14.4973	2.36678
734.1	28367.4	33152.1	28.3674	33.1521	3.94037	4.51886	3.55136	13.0686	1.7575
744.6	28754.4	33577.9	28.7544	33.5779	3.19594	3.69872	4.65983	13.1476	1.63299
755.2	29145.2	34007.7	29.1452	34.0077	2.35337	3.46448	2.29061	11.057	1.46986
765.7	29532.2	34433.4	29.5322	34.4334	2.91258	3.69825	3.20728	12.8164	1.36083
776.2	29919.2	34859.2	29.9192	34.8592	2.10235	3.15353	2.99082	11.912	1.17525
786.7	30306.3	35284.9	30.3063	35.2849	2.73505	3.54869	3.60651	12.3566	0.889988
792	30501.6	35499.8	30.5016	35.4998	2.80302	2.45604	2.86011	14.7016	1.87317
803.8	30936.6	35978.2	30.9366	35.9782	1.16841	1.89053	2.69059	13.2441	1.43101
815.6	31371.5	36456.7	31.3715	36.4567	3.06551	4.54315	4.21691	14.4671	1.04485
827.4	31806.5	36935.1	31.8065	36.9351	5.12365	7.47444	4.40096	14.5768	0.889695
839.2	32241.4	37413.6	32.2414	37.4136	1.51717	3.03433	3.13353	13.1184	0.715199
851	32676.4	37892	32.6764	37.892	1.81533	3.77093	3.94288	13.1811	0.664455
862.8	33111.3	38370.5	33.1113	38.3705	5.15633	6.23284	6.17463	16.1428	1.23939
874.6	33546.3	38848.9	33.5463	38.8489	4.2956	5.20746	4.42627	12.9785	0.890496
883.1	33859.6	39193.6	33.8596	39.1936	2.62516	4.92979	4.52517	13.6662	1.47565
884	33892.8	39230.1	33.8928	39.2301	3.4313	4.58946	3.10679	13.5756	1.02102
894	34261.4	39635.5	34.2614	39.6355	4.44299	4.62349	4.11522	14.0449	0.786889
904	34630	40041	34.63	40.041	3.42419	4.50775	4.39089	15.2813	1.2
914	34633.4	40044.7	34.6334	40.0447	2.19626	2.55269	3.15269	14.9176	1.11716
924	34636.9	40048.4	34.6369	40.0484	5.31282	5.00754	4.93766	15.4319	0.666667
933	34640	40051.8	34.64	40.0518	4.51361	5.58655	5.48375	15.5401	0.390434
934	34640.3	40052.1	34.6403	40.0521	3.764	4.09183	4.06138	15.5566	1.13519
945.2	34644.2	40056.3	34.6442	40.0563	2.4973	4.45023	3.21222	13.6021	1.47905
956.4	34648.1	40060.5	34.6481	40.0605	3.66332	6.45953	4.51513	13.3302	1.50188
967.6	34651.9	40064.6	34.6519	40.0646	3.79307	5.20275	4.14296	14.5621	0.553001
978.7	34655.8	40068.8	34.6558	40.0688	2.92463	5.57286	4.08155	14.8143	0.644826
989.9	34659.6	40072.9	34.6596	40.0729	4.37913	6.19402	5.45752	16.1646	0.628695
1001.1	34663.5	40077.1	34.6635	40.0771	3.30913	4.66982	2.77168	12.6481	0.446322
1019	34669.7	40083.7	34.6697	40.0837	3.73546	5.20888	3.6718	13.9048	0.667161
1029.7	34673.3	40087.7	34.6733	40.0877	2.5976	3.54737	3.37951	13.7282	1.07694
1040.4	34677	40091.7	34.677	40.0917	3.99339	5.62008	4.32695	13.6131	0.425628
1051.1	34680.7	40095.7	34.6807	40.0957	3.99812	4.90127	4.16666	15.2246	1.1161
1061.8	34684.4	40099.6	34.6844	40.0996	5.69281	6.80242	4.96743	15.4444	0.827606
1067.2	34686.3	40101.7	34.6863	40.1017	4.91212	4.48533	5.03271	14.251	1.04542
1072	34687.9	40103.4	34.6879	40.1034	3.20665	4.09235	4.45922	14.3594	0.409616
1082.1	34691.4	40107.2	34.6914	40.1072	3.3733	4.84772	4.2062	14.6234	1.18217
1092.2	34694.9	40110.9	34.6949	40.1109	6.99721	7.06803	5.88546	15.0563	1.1547
1102.4	34698.4	40114.7	34.6984	40.1147	4.43151	5.19183	4.80642	14.6893	0.678064
1112.5	34701.9	40118.5	34.7019	40.1185	7.75612	7.7957	6.01391	16.5684	1.22513
1122.6	34705.4	40122.2	34.7054	40.1222	8.84837	6.97358	6.22352	14.216	1.29505
1132.7	34708.9	40126	34.7089	40.126	6.28082	7.01079	5.47166	14.134	1.03234
1142.9	34712.4	40129.8	34.7124	40.1298	5.48248	5.76539	5.3434	14.4171	0.758825
1153	34715.9	40133.5	34.7159	40.1335	7.22994	7.63543	7.65805	16.4706	1.2006
1155	34716.6	40134.3	34.7166	40.1343	7.02312	7.69058	5.12924	15.9101	1.97825
1165	34720	40138	34.72	40.138	5.14881	5.26949	4.67893	14.3525	1.10319
1175	34829.6	40256	34.8296	40.256	4.78267	6.1204	5.13869	13.95	0.858019
1185	34939.3	40374	34.9393	40.374	4.45024	5.93672	4.05209	13.5101	1.45535
1195	35048.9	40492	35.0489	40.492	5.64448	5.3252	3.82358	12.7407	0.970523
1205	35158.5	40610	35.1585	40.61	4.47582	5.60086	4.72509	14.1508	0.635001
1215	35268.1	40728	35.2681	40.728	3.95887	4.079	4.27599	13.5657	1.06904
1221	35333.9	40798.8	35.3339	40.7988	3.9469	5.97097	3.02072	14.4464	0.747435
1232.7	35462.2	40936.9	35.4622	40.9369	4.27284	5.20553	4.72974	15.4043	0.863868
1242.3	35567.4	41050.1	35.5674	41.0501	5.67456	5.89409	4.17486	12.7738	0.529999
1253	35684.7	41176.4	35.6847	41.1764	5.03549	6.95458	4.90777	14.2739	1.10721
1263.7	35802	41302.7	35.802	41.3027	5.88765	7.27239	5.01329	14.4904	0.955325
1273.4	35908.4	41417.1	35.9084	41.4171	4.10687	6.74686	5.02707	14.7751	0.891756
1284.5	36030.1	41548.1	36.0301	41.5481	6.448	6.84359	7.54794	16.2268	2.28558

## Sheet: Saltpan
Sample	Sample age	Sample age	Sample age (min?) ka, assumed BP	Sample age (max?) ka, assumed BP	tropical forest	warm-temperate forest	savanna and dry woodland	grassland and dry shrubland	desert
237	2271.94	2275.56	2.27194	2.27556	5.02252	4.27013	13.7085	17.921	1.78017
267	2707.36	2826.39	2.70736	2.82639	5.68622	3.31574	13.764	17.97	3.20307
275	2823.47	2973.28	2.82347	2.97328	6.69573	4.32144	16.0596	17.9574	1.49723
322	3505.62	3836.25	3.50563	3.83625	7.75898	4.97275	14.4071	17.4547	1.78529
352	3941.04	4387.08	3.94104	4.38708	5.95622	3.27709	14.2624	17.4372	2.30864
372	4231.32	4754.31	4.23132	4.75431	7.42	4.31868	14.8083	18.0631	3.25478
390	4428.11	5002.91	4.42811	5.00291
422	4480	5066.33	4.48	5.06633	6.91942	3.90165	13.9905	16.4706	1.96642
462	4544.86	5145.61	4.54486	5.14561
502	4731.09	5357.81	4.73109	5.35781	8.0174	3.94819	15.3316	17.7529	3.51676
542	5605.04	6323.19	5.60504	6.32319
572	6260.5	7047.22	6.2605	7.04722	5.992	4.03368	14.7544	16.4823	2.36036
592	6697.48	7529.91	6.69748	7.52991
612	7134.45	8012.6	7.13445	8.0126	9.7328	4.31868	18.9908	22.3024	2.79179
640	8155.82	9209.18	8.15582	9.20918
1177	28686.9	33356.5	28.6869	33.3565	0.985329	3.36412	2.95599	13.5429	0.985329
1210	29948.6	34840.4	29.9486	34.8404
1220	30330.9	35290.1	30.3309	35.2901	0.617802	2.1311	9.06612	15.1184	1.99925
1286	31198	36294.5	31.198	36.2945
1306	31279.6	36384.2	31.2796	36.3842	2.53173	1.38465	10.7141	14.6591	5.27366
1390	31622.4	36760.9	31.6224	36.7609
1413	31716.3	36864	31.7163	36.864	1.5178	2.1465	10.046	19.706	4.21741
1433	31798	36953.7	31.798	36.9537
1474	31965.3	37137.6	31.9653	37.1376	5.09523	2.19847	13.2081	15.5167	1.80907
1510	32112.2	37299	32.1122	37.299
1552	32283.7	37487.3	32.2837	37.4873	3.93617	2.15503	12.33	17.9948	3.94032
1625	32905.5		32.9055
1635	33108.2		33.1082		1.26491	2.36036	9.63699	17.344	5.65242
1646	33331.2		33.3312
1660	33615.1		33.6151		1.7279	2.36036	10.5188	18.8795	4.77674
1690	34223.3		34.2233
1766	35764.1		35.7641		1.67199	2.84593	10.489	19.9985	6.09688
1804	36534.5		36.5345
1852	37507.7		37.5077		5.52263	5.05964	15.1719	22.6612	6.40997
1870	37872.6		37.8726
1920	38886.3		38.8863		3.65551	1.07417	14.8007	19.7682	5.40962
1966	39818.9		39.8189
1986	40338.6		40.3386		6.12115	5.72668	16.9327	23.8625	7.34154
2006	40886.8		40.8868
2036	41709.1		41.7091		3.20863	1.90028	10.1588	13.9546	3.90518
2112	43792.3		43.7923
2260	47849.1		47.8491		1.89737	3.79473	10.0929	12.4015	0.894427
2463	53308.1		53.3081
2610	57200.5		57.2005		5.69415	5.49173	15.0206	20.3514	3.81175
2685	59186.4		59.1864
2800	62231.4		62.2314		5.42402	3.39055	13.1818	20.3583	2.81212
2915	65276.5		65.2765
3027	68242.1		68.2421
3089	69883.8		69.8838		4.84029	5.03673	15.291	19.9693	3.03728
3180	72220.9		72.2209
3296	75012.1		75.0121		8.98481	5.87933	20.2218	23.0135	3.25478
3356	76455.9		76.4559
3392	77322.1		77.3221		5.35825	4.35531	9.96853	17.3178	2.82335
3452	78765.9		78.7659
4720	102762		102.762		0	4.47214	8.07867	15.5208	4.23481
6950	154575		154.575
6975	155032		155.032		5.3312	7.2249	10.5083	15.1445	1.23325
7040	156222		156.222
7134	157942		157.942		3.5989	6.18089	10.7634	15.9056	1.05409
7216	159443		159.443
7289	160779		160.779		6.18604	4.06864	13.9262	17.3149	1.95123
7329	161511		161.511
7775	169672		169.673		6.19588	3.07608	13.9684	19.1773	5.46805
7779	169746		169.746
7862	171887		171.887		6.13571	2.93823	16.7863	18.5751	5.25103
7942	174155		174.155
8083	178152		178.152		5.28868	4.32263	17.6454	20.2665	6.16832
8134	179597		179.597
8307	184501		184.501		7.02911	6.7267	16.6518	20.8455	4.35642
8447	188470		188.47
8520	190539		190.539		4.24923	5.94741	14.8892	18.3066	3.82788
8606	192976		192.976
8728	196435		196.435		9.84427	3.61804	19.1114	21.7386	3.61804
8831	199354		199.354

## Sheet: Mfabeni
DEPTH (m)	Age (linear interpol. radio dates)	Age (linear interpol. radio dates), ka, assumed BP	tropical forest	warm-temperate forest	savanna and dry woodland	grassland and dry shrubland	desert
0.1	-991.59	-0.99159	5.70172	0.996271	10.125	13.9136	2.98881
0.2	-506.08	-0.50608	1.62221	0.540738	7.88559	10.7605	2.33416
0.3	-20.57	-0.02057	2.26147	0.724524	9.94785	11.9273	1.8701
0.35	222.185	0.222185	5.87513	2.96565	10.1384	10.1384	0.812444
0.4	464.94	0.46494	1.88842	0.69758	7.70426	11.1859	2.83215
0.45	707.695	0.707695	2.00302	0.609145	10.128	10.128	0.609145
0.5	950.45	0.95045	4.09909	0.537215	9.74397	10.5037	0.379869
0.6	1435.96	1.43596	6.21733	1.48888	9.24322	11.1432	0.496292
0.7	1921.47	1.92147	7.18976	1.90397	10.2152	10.9937	0.449467
0.75	2164.23	2.16423	0.444554	0	9.33271	9.33271	0.769991
0.8	2406.98	2.40698	1.50349	0	3.86338	4.20398	0.481683
0.85	2649.74	2.64974	4.69715	2.57237	5.27251	5.27251	0
0.9	2892.49	2.89249	9.36373	3.06511	10.0376	11.2729	1.44715
1	3378	3.378	6.03356	2.78165	10.187	10.187	0
1.1	3863.51	3.86351	5.73219	1.98778	7.2614	7.2614	0.753244
1.15	4106.26	4.10626	2.77177	0.624391	7.5564	7.5564	0
1.2	4349.02	4.34902	10.0109	3.67634	10.2819	10.7328	2.5453
1.3	4834.53	4.83453	10.2769	3.9075	12.2338	13.5261	3.36049
1.4	5320.04	5.32004	10.4352	3.63628	13.0577	16.3583	4.98133
1.5	5805.55	5.80555	6.61135	2.75318	11.4129	14.9225	5.26923
1.6	6291.06	6.29106	4.52603	1.74731	12.8979	14.4251	2.90619
1.7	6776.57	6.77657	5.26106	1.60156	13.0416	14.0569	3.73873
1.8	7262.08	7.26208	3.92232	0.980581	12.0186	13.1509	2.96434
1.9	7747.59	7.74759	4.60061	0.635001	14.3562	16.1523	5.40204
1.95	7990.34	7.99034	3.11752	1.04925	9.58644	11.7282	2.14176
2	8233.1	8.2331	2.76745	0.62197	9.95211	10.9355	2.30282
2.05	8475.85	8.47585	2.84887	1.81568	8.61032	8.61032	0.605228
2.1	8718.61	8.71861	4.94888	1.59723	10.7924	13.5632	3.20895
2.2	9204.12	9.20412	3.82294	1.3408	11.501	12.7552	2.07528
2.3	9689.63	9.68963	3.12837	1.01797	11.9138	13.4408	2.03595
2.4	10175.1	10.1751	4.86815	1.62716	11.4336	12.6666	1.35388
2.5	10660.6	10.6607	4.49046	1.98479	11.4056	14.1644	3.40906
2.6	11146.2	11.1462	5.17725	1.41696	11.4924	13.343	3.31925
2.7	11631.7	11.6317	3.14972	0.922531	10.4873	11.1396	1.30466
2.8	12117.2	12.1172	7.52793	2.39387	10.7314	12.8623	2.59824
2.9	12602.7	12.6027	3.59442	0.469841	9.52087	10.8045	1.94808
3	13088.2	13.0882	4.87783	0.977231	11.0277	11.8536	1.98801
3.1	13573.7	13.5737	3.18602	1.26681	9.86378	10.9451	2.0314
3.2	14059.2	14.0592	3.94027	0.796061	9.66253	10.522	1.62927
3.3	14544.7	14.5447	3.7605	1.69635	9.26177	9.80094	1.74477
3.4	15030.2	15.0302	3.43744	1.18673	9.73503	10.3493	1.22859
3.5	15515.8	15.5158	3.14347	0.628695	9.83608	10.4648	1.80185
3.6	16001.3	16.0013	4.17164	1.53393	10.6186	12.1403	2.25557
3.7	16486.8	16.4868	2.76702	1.42888	9.98611	10.9461	2.65185
3.8	16972.3	16.9723	3.1063	0.675224	9.64551	10.872	1.90177
3.9	17457.8	17.4578	3.45845	1.5628	10.0751	11.5368	2.78207
4	17943.3	17.9433	2.39043	0.834058	11.0074	11.5972	2.70181
4.1	18428.8	18.4288	3.26519	1.81138	10.1696	11.8267	3.7806
4.2	18914.3	18.9143	2.75324	0.917746	10.6953	12.8091	3.7219
4.3	19399.8	19.3998	3.03461	0.92992	9.25621	10.5713	2.17466
4.4	19885.3	19.8853	1.70406	0.852029	10.2226	11.9522	2.90852
4.5	20370.9	20.3709	2.00636	2.00636	10.6373	12.1061	2.76665
4.6	20856.4	20.8564	0.794301	0.794301	10.2636	11.5488	2.83184
4.7	21341.9	21.3419	2.34736	1.30066	9.98367	11.3477	2.66474
4.8	21827.4	21.8274	1.52721	1.14541	10.5368	12.343	3.44263
4.9	22312.9	22.3129	1.19202	0.823666	9.91166	11.7086	3.5939
5	22798.4	22.7984	0	0	9.22687	9.22687	1.06399
5.1	23283.9	23.2839	0	0	8.98961	8.98961	0.615457
5.2	23769.4	23.7694	1.43131	1.07348	9.09891	9.09891	1.648
5.3	24254.9	24.2549	0	0	9.26184	9.72116	1.83726
5.4	24740.4	24.7404	1.62951	1.32889	8.77069	8.77069	1.08648
5.5	25226	25.226	2.0884	1.25641	8.5801	9.66438	1.57716
5.6	25711.5	25.7115	1.72196	0.715382	9.00059	9.45304	1.38101
5.7	26197	26.197	1.22842	0.752497	8.64166	9.11758	1.46689
5.8	26682.5	26.6825	2.09857	0.91863	9.54072	10.3793	2.80473
5.9	27168	27.168	2.2744	0.971286	9.24573	10.1145	2.17186
6	27653.5	27.6535	1.35824	0.964486	8.63966	9.1965	1.24515
6.1	28139	28.139	2.61641	1.39269	9.89648	9.89648	1.47074
6.2	28624.5	28.6245	2.21255	0.744667	8.63866	9.06859	1.35957
6.3	29110	29.11	2.18527	1.43992	9.91248	9.91248	1.74801
6.4	29595.5	29.5955	1.39865	1.02388	10.6785	11.8028	3.0866
6.5	30081.1	30.0811	1.39865	1.02388	10.6785	11.8028	3.0866
6.6	30566.6	30.5666
6.7	31052.1	31.0521	2.01608	1.58212	10.172	11.5374	2.5928
6.8	31537.6	31.5376
6.9	32023.1	32.0231	2.94005	1.21781	10.7503	11.4637	3.17593
7	32508.6	32.5086	0.977064	0.977064	11.3065	13.4153	4.60474
7.05	32751.4	32.7514	0.521996	0.521996	8.62479	9.14678	0.521996
7.1	32994.1	32.9941	2.33673	0.948309	10.3958	11.3141	2.50132
7.2	33479.6	33.4796	1.16688	0.642382	10.5334	11.4288	1.57107
7.25	33722.4	33.7224	0.727393	0.727393	10.2275	12.0581	3.79831
7.3	33965.1	33.9651	2.5063	1.05215	9.94299	11.0779	3.31084
7.4	34450.6	34.4506	1.05168	1.05168	10.3346	11.3373	2.2716
7.5	34936.2	34.9362	1.9319	1.39195	12.1827	14.0397	3.87209
7.55	35178.9	35.1789	2.59309	2.36745	11.1854	13.3933	2.2079
7.6	35421.7	35.4217
7.65	35664.4	35.6644	1.82905	1.82905	11.6814	12.904	2.38247
7.7	35907.2	35.9072
7.8	36392.7	36.3927	3.75194	3.26025	12.0563	12.6188	2.3766
7.9	36878.2	36.8782
8	37363.7	37.3637	2.58994	1.58409	9.29582	9.29582	0.751646
8.1	37849.2	37.8492
8.15	38092	38.092	2.99446	2.73758	8.34124	8.34124	1.24035
8.2	38334.7	38.3347
8.25	38577.5	38.5775	2.23976	1.13564	8.12128	8.12128	0.607831
8.3	38820.2	38.8202
8.35	39063	39.063	1.81663	1.03457	11.7976	13.4566	2.21201
8.4	39305.7	39.3057
8.45	39548.5	39.5485	1.07109	1.07109	7.58339	7.58339	0.874539
8.5	39791.3	39.7913
8.6	40276.8	40.2768	3.72404	1.82398	12.9216	14.2136	2.3731
8.7	40762.3	40.7623
8.8	41247.8	41.2478	0.908153	0.908153	9.56384	10.0179	0.454077
8.9	41733.3	41.7333
9	42218.8	42.2188	1.32014	1.32014	10.6045	11.1979	2.64896
9.1	42704.3	42.7043
9.2	43189.8	43.1898	1.60237	1.13305	10.2622	11.2008	2.90114
9.3	43675.3	43.6753
9.35	43918.1	43.9181	2.0937	1.57027	10.0965	12.055	3.00532
9.4	44160.8	44.1608
9.5	44646.4	44.6464	0.426014	0	8.97986	8.97986	0.852029
9.6	45131.9	45.1319
9.7	45617.4	45.6174	0.507673	0	10.6233	10.6233	0.879316
9.8	46102.9	46.1029	0.886484	0.886484	10.9753	10.9753	1.25368
