# Supplementary material for: Terrestrial biosphere changes over the last 120 kyr
Source: Copernicus journal article supplement (doi:10.5194/cp-12-51-2016), 2016-01-18
Supplement: Supplementary file 1 [file cp-12-51-2016-supplement.zip › supplement/Africa/BiomizationAfricaJollyetal1998.xls]

## Sheet: Albert F
		pft																		MEGABIOMES							MEGABIOMES
	Taxa	bs	ts	ts1	ts2	wte	wte2	ec	Te1	Te2	Tr1	Tr2	Tr3	Tss	tss	sf	df			tropical forest	warm-temperate forest	savanna and dry woodland	grassland and dry shrubland	desert		sqrt	tropical forest	warm-temperate forest	savanna and dry woodland	grassland and dry shrubland	desert
Acalypha	Acalypha										1	1	1							1	0	1	0	0		0	0	0	0	0	0
Acanthaceae	Acanthaceae											1	1	1	1	1				1	0	1	1	0		0	0	0	0	0	0
Alchornea	Alchornea					1			1	1										1	1	0	0	0		0	0	0	0	0	0
Amaranthus-type	Amaranthaceae											1	1	1		1	1			1	0	1	1	1		0	0	0	0	0	0
Aningeria spp.	Sapotaceae					1			1	1	1	1	1							1	1	1	0	0		0	0	0	0	0	0
Anthocleista	Anthocleista					1					1									1	1	0	0	0		0	0	0	0	0	0
Antidesma	Antidesma*											1								1	0	0	0	0		0	0	0	0	0	0
Artemisia	Artemisia															1	1			0	0	0	1	1		0	0	0	0	0	0
Balanites																				0	0	0	0	0		0	0	0	0	0	0
Boraginaceae																				0	0	0	0	0		0	0	0	0	0	0
Bridelia	Bridelia					1			1	1	1	1								1	1	0	0	0		0	0	0	0	0	0
Celtis	Celtis					1					1	1								1	1	0	0	0		0	0	0	0	0	0
Chaetacme	Chaetacme										1									1	0	0	0	0		0	0	0	0	0	0
Chrysophyllum	Sapotaceae					1			1	1	1	1	1							1	1	1	0	0		0	0	0	0	0	0
Combretaceae	Combretaceae/Melastomataceae					1			1	1	1	1	1	1						1	1	1	1	0		0	0	0	0	0	0
Compositae	Compositae												1	1		1	1			0	0	1	1	1		0	0	0	0	0	0
Cyperaceae																				0	0	0	0	0		0	0	0	0	0	0
Dobera																				0	0	0	0	0		0	0	0	0	0	0
Dombeya	Dombeya					1						1	1		1					1	1	1	1	0		0	0	0	0	0	0
Ericaceae	Ericaceae														1					0	0	0	1	0		0	0	0	0	0	0
Eriosema-type	Leguminosae								1	1	1									1	0	0	0	0		0	0	0	0	0	0
Euphorbiaceae																				0	0	0	0	0		0	0	0	0	0	0
Excoecari-type																				0	0	0	0	0		0	0	0	0	0	0
Fagara spp.	Rutaceae					1			1	1										1	1	0	0	0		0	0	0	0	0	0
Faurea spp.																				0	0	0	0	0		0	0	0	0	0	0
Gramineae	Gramineae												1	1	1	1				0	0	1	1	0		0	0	0	0	0	0
Hagenia																				0	0	0	0	0		0	0	0	0	0	0
Holoptelea																				0	0	0	0	0		0	0	0	0	0	0
Hymenocardia	Hymenocardia										1	1								1	0	0	0	0		0	0	0	0	0	0
Inapeturate																				0	0	0	0	0		0	0	0	0	0	0
Indeterminables																				0	0	0	0	0		0	0	0	0	0	0
Indetermines																				0	0	0	0	0		0	0	0	0	0	0
Juniperus-type																				0	0	0	0	0		0	0	0	0	0	0
Lannea spp.	Anacardiaceae																			0	0	0	0	0		0	0	0	0	0	0
Liliaceae	Liliaceae												1	1	1	1	1			0	0	1	1	1		0	0	0	0	0	0
Macaranga	Macaranga					1			1	1										1	1	0	0	0		0	0	0	0	0	0
Maesopsis-type	Rhamnaceae					1			1	1	1	1	1	1		1	1			1	1	1	1	1		0	0	0	0	0	0
Mallotus																				0	0	0	0	0		0	0	0	0	0	0
Monoletes																				0	0	0	0	0		0	0	0	0	0	0
Moraceae-type	Moraceae					1			1	1	1	1								1	1	0	0	0		0	0	0	0	0	0
Myrica spp.	Myrica					1									1					0	1	0	1	0		0	0	0	0	0	0
Myriophyllum																				0	0	0	0	0		0	0	0	0	0	0
Myrtaceae	Myrtaceae								1	1	1	1								1	0	0	0	0		0	0	0	0	0	0
Olea hochstetteri	Olea					1	1					1			1					1	1	0	1	0		0	0	0	0	0	0
Olea welwitschii	Olea					1	1					1			1					1	1	0	1	0		0	0	0	0	0	0
Phoenix reclinata	Phoenix reclinata									1	1									1	0	0	0	0		0	0	0	0	0	0
Phyllanthus spp.	Phyllanthus					1			1	1	1	1								1	1	0	0	0		0	0	0	0	0	0
Piperaceae																				0	0	0	0	0		0	0	0	0	0	0
Podocarpus	Podocarpus					1														0	1	0	0	0		0	0	0	0	0	0
Polygonum spp.																				0	0	0	0	0		0	0	0	0	0	0
Protea spp.	Protea													1						0	0	0	1	0		0	0	0	0	0	0
Pseudospondias																				0	0	0	0	0		0	0	0	0	0	0
Randia spp.	Rubiaceae											1								1	0	0	0	0		0	0	0	0	0	0
Rapanea	Myrsinaceae					1						1	1							1	1	1	0	0		0	0	0	0	0	0
Rubiaceae	Rubiaceae											1								1	0	0	0	0		0	0	0	0	0	0
Rutaceae	Rutaceae					1			1	1										1	1	0	0	0		0	0	0	0	0	0
Salvadora																				0	0	0	0	0		0	0	0	0	0	0
Sapindaceae	Sapindaceae										1	1								1	0	0	0	0		0	0	0	0	0	0
Sapotaceae	Sapotaceae					1			1	1	1	1	1							1	1	1	0	0		0	0	0	0	0	0
Trema spp.	Trema*					1					1	1	1							1	1	1	0	0		0	0	0	0	0	0
Triletes																				0	0	0	0	0		0	0	0	0	0	0
Typha																				0	0	0	0	0		0	0	0	0	0	0
																											0	0	0	0	0

## Sheet: Mubwindiswamp3
		pft																		MEGABIOMES							MEGABIOMES
	Taxa	bs	ts	ts1	ts2	wte	wte2	ec	Te1	Te2	Tr1	Tr2	Tr3	Tss	tss	sf	df			tropical forest	warm-temperate forest	savanna and dry woodland	grassland and dry shrubland	desert		sqrt	tropical forest	warm-temperate forest	savanna and dry woodland	grassland and dry shrubland	desert
Acalypha	Acalypha										1	1	1							1	0	1	0	0		0	0	0	0	0	0
Afrocrania	Afrocrania					1														0	1	0	0	0		0	0	0	0	0	0
Alchemilla	Alchemilla														1	1				0	0	0	1	0		0	0	0	0	0	0
Alchornea	Alchornea					1			1	1										1	1	0	0	0		0	0	0	0	0	0
Antheroceras																				0	0	0	0	0		0	0	0	0	0	0
Anthocleista	Anthocleista					1					1									1	1	0	0	0		0	0	0	0	0	0
Anthospermum	Anthospermum											1	1		1					1	0	1	1	0		0	0	0	0	0	0
Artemisia	Artemisia															1	1			0	0	0	1	1		0	0	0	0	0	0
Bidens																				0	0	0	0	0		0	0	0	0	0	0
Callitriche																				0	0	0	0	0		0	0	0	0	0	0
Carduus	Compositae												1	1		1	1			0	0	1	1	1		0	0	0	0	0	0
Cassipourea																				0	0	0	0	0		0	0	0	0	0	0
Celastraceae	Celastraceae/Hippocrateaceae					1			1	1	1	1								1	1	0	0	0		0	0	0	0	0	0
Celtis	Celtis					1					1	1								1	1	0	0	0		0	0	0	0	0	0
Chenopodium	Chenopodiaceae															1	1			0	0	0	1	1		0	0	0	0	0	0
Clematis	Clematis*											1	1							1	0	1	0	0		0	0	0	0	0	0
Cliffortia	Cliffortia														1					0	0	0	1	0		0	0	0	0	0	0
Commiphora	Commiphora												1	1	1	1				0	0	1	1	0		0	0	0	0	0	0
Compositae	Compositae												1	1		1	1			0	0	1	1	1		0	0	0	0	0	0
Cruciferae	Cruciferae																1			0	0	0	0	1		0	0	0	0	0	0
Cussonia/Schefflera	Cussonia					1						1	1	1						1	1	1	1	0		0	0	0	0	0	0
Cyperaceae																				0	0	0	0	0		0	0	0	0	0	0
Dendrosenecio	Dendrosenecio															1				0	0	0	1	0		0	0	0	0	0	0
Dodonaea																				0	0	0	0	0		0	0	0	0	0	0
Dombeya	Dombeya					1						1	1		1					1	1	1	1	0		0	0	0	0	0	0
Epilobium																				0	0	0	0	0		0	0	0	0	0	0
Ericaceae	Ericaceae														1					0	0	0	1	0		0	0	0	0	0	0
Faurea																				0	0	0	0	0		0	0	0	0	0	0
Ficus	Ficus								1	1	1	1								1	0	0	0	0		0	0	0	0	0	0
Galium	Rubiaceae											1								1	0	0	0	0		0	0	0	0	0	0
Gramatis																				0	0	0	0	0		0	0	0	0	0	0
Gramineae	Gramineae												1	1	1	1				0	0	1	1	0		0	0	0	0	0	0
Gunnera	Gunnera														1	1				0	0	0	1	0		0	0	0	0	0	0
Hagenia																				0	0	0	0	0		0	0	0	0	0	0
Helichrysum	Helichrysum														1					0	0	0	1	0		0	0	0	0	0	0
Hydrocotyle																				0	0	0	0	0		0	0	0	0	0	0
Hypericum	Hypericum											1								1	0	0	0	0		0	0	0	0	0	0
Ilex																				0	0	0	0	0		0	0	0	0	0	0
Impatiens	Impatiens					1														0	1	0	0	0		0	0	0	0	0	0
Indetermines																				0	0	0	0	0		0	0	0	0	0	0
Isoglossa	Isoglossa										1		1							1	0	1	0	0		0	0	0	0	0	0
Jasminum	Oleaceae					1						1			1					1	1	0	1	0		0	0	0	0	0	0
Juniperus																				0	0	0	0	0		0	0	0	0	0	0
Laportea	Urticaceae					1			1	1	1	1								1	1	0	0	0		0	0	0	0	0	0
Lobelia	Lobelia															1				0	0	0	1	0		0	0	0	0	0	0
Lythrum																				0	0	0	0	0		0	0	0	0	0	0
Macaranga	Macaranga					1			1	1										1	1	0	0	0		0	0	0	0	0	0
Mimulopsis	Acanthaceae											1	1	1	1	1				1	0	1	1	0		0	0	0	0	0	0
Monoletes																				0	0	0	0	0		0	0	0	0	0	0
Morus	Moraceae					1			1	1	1	1								1	1	0	0	0		0	0	0	0	0	0
Myrica	Myrica					1									1					0	1	0	1	0		0	0	0	0	0	0
Myrtaceae	Myrtaceae								1	1	1	1								1	0	0	0	0		0	0	0	0	0	0
Neoboutonia																				0	0	0	0	0		0	0	0	0	0	0
Newtonia	Leguminosae								1	1	1									1	0	0	0	0		0	0	0	0	0	0
Nuxia	Nuxia											1			1	1				1	0	0	1	0		0	0	0	0	0	0
Olea	Olea					1	1					1			1					1	1	0	1	0		0	0	0	0	0	0
Pilea	Urticaceae					1			1	1	1	1								1	1	0	0	0		0	0	0	0	0	0
Plantago	Plantago															1	1			0	0	0	1	1		0	0	0	0	0	0
Plectranthus																				0	0	0	0	0		0	0	0	0	0	0
Podocarpus	Podocarpus					1														0	1	0	0	0		0	0	0	0	0	0
Polypodium																				0	0	0	0	0		0	0	0	0	0	0
Polyscias																				0	0	0	0	0		0	0	0	0	0	0
Potamogeton																				0	0	0	0	0		0	0	0	0	0	0
Prunus	Prunus africana					1				1	1									1	1	0	0	0		0	0	0	0	0	0
Pteris																				0	0	0	0	0		0	0	0	0	0	0
Rapanea	Myrsinaceae					1						1	1							1	1	1	0	0		0	0	0	0	0	0
Rhamnus	Rhamnaceae					1			1	1	1	1	1	1		1	1			1	1	1	1	1		0	0	0	0	0	0
Rhus	Anacardiaceae																			0	0	0	0	0		0	0	0	0	0	0
Rumex	Rumex					1						1	1		1					1	1	1	1	0		0	0	0	0	0	0
Selaginella																				0	0	0	0	0		0	0	0	0	0	0
Sphagnum																				0	0	0	0	0		0	0	0	0	0	0
Stoebe	Stoebe														1					0	0	0	1	0		0	0	0	0	0	0
Teclea	Teclea*										1	1	1		1					1	0	1	1	0		0	0	0	0	0	0
Triletes																				0	0	0	0	0		0	0	0	0	0	0
Typha																				0	0	0	0	0		0	0	0	0	0	0
Umbelliferae	Umbellifera												1	1	1	1				0	0	1	1	0		0	0	0	0	0	0
Urticaceae	Urticaceae					1			1	1	1	1								1	1	0	0	0		0	0	0	0	0	0
Vernonia	Compositae Vernonieae												1			1				0	0	1	1	0		0	0	0	0	0	0
Zanthoxylum	Zanthoxylum					1					1	1	1							1	1	1	0	0		0	0	0	0	0	0
																											0	0	0	0	0

## Sheet: Kamiranzovy 1
		pft																		MEGABIOMES							MEGABIOMES
	Taxa	bs	ts	ts1	ts2	wte	wte2	ec	Te1	Te2	Tr1	Tr2	Tr3	Tss	tss	sf	df			tropical forest	warm-temperate forest	savanna and dry woodland	grassland and dry shrubland	desert		SQRT	tropical forest	warm-temperate forest	savanna and dry woodland	grassland and dry shrubland	desert
Acacia	Acacia											1	1	1	1	1				1	0	1	1	0		0	0	0	0	0	0
Acalypha	Acalypha										1	1	1							1	0	1	0	0		0	0	0	0	0	0
Achyranthes-type aspera	Achyranthes* aspera											1	1	1		1				1	0	1	1	0		0	0	0	0	0	0
Afrocrania	Afrocrania					1														0	1	0	0	0		0	0	0	0	0	0
Alchemilla	Alchemilla														1	1				0	0	0	1	0		0	0	0	0	0	0
Alchornea	Alchornea					1			1	1										1	1	0	0	0		0	0	0	0	0	0
Amaranthaceae/Chenopodiaceae	Amaranthaceae/Chenopodiaceae													1		1	1			0	0	0	1	1		0	0	0	0	0	0
Anthocerotaceae																				0	0	0	0	0		0	0	0	0	0	0
Anthocleista	Anthocleista					1					1									1	1	0	0	0		0	0	0	0	0	0
Anthospermum	Anthospermum											1	1		1					1	0	1	1	0		0	0	0	0	0	0
Araliaceae																				0	0	0	0	0		0	0	0	0	0	0
Artemisia	Artemisia															1	1			0	0	0	1	1		0	0	0	0	0	0
Begonia																				0	0	0	0	0		0	0	0	0	0	0
Burnatia																				0	0	0	0	0		0	0	0	0	0	0
Carduus-type	Compositae												1	1		1	1			0	0	1	1	1		0	0	0	0	0	0
Caryophyllaceae	Caryophyllaceae											1								1	0	0	0	0		0	0	0	0	0	0
Celastraceae	Celastraceae/Hippocrateaceae					1			1	1	1	1								1	1	0	0	0		0	0	0	0	0	0
Celtis	Celtis					1					1	1								1	1	0	0	0		0	0	0	0	0	0
Chenopodium-type	Chenopodiaceae															1	1			0	0	0	1	1		0	0	0	0	0	0
Clematis	Clematis*											1	1							1	0	1	0	0		0	0	0	0	0	0
Cliffortia	Cliffortia														1					0	0	0	1	0		0	0	0	0	0	0
Combretaceae/Melastomataceae	Combretaceae/Melastomataceae					1			1	1	1	1	1	1						1	1	1	1	0		0	0	0	0	0	0
Commiphora	Commiphora												1	1	1	1				0	0	1	1	0		0	0	0	0	0	0
Convolvulaceae	Convolvulaceae										1	1	1							1	0	1	0	0		0	0	0	0	0	0
Croton-type	Croton					1					1	1	1		1					1	1	1	1	0		0	0	0	0	0	0
Cyathea																				0	0	0	0	0		0	0	0	0	0	0
Cyperaceae																				0	0	0	0	0		0	0	0	0	0	0
Diospyros-type	Diospyros					1						1	1							1	1	1	0	0		0	0	0	0	0	0
Dodonaea																				0	0	0	0	0		0	0	0	0	0	0
Dombeya-type	Dombeya					1						1	1		1					1	1	1	1	0		0	0	0	0	0	0
Droseraceae																				0	0	0	0	0		0	0	0	0	0	0
Ericaceae	Ericaceae														1					0	0	0	1	0		0	0	0	0	0	0
Faurea/Allophylus	Allophylus					1					1	1	1							1	1	1	0	0		0	0	0	0	0	0
Ficalhoa	Ficalhoa					1						1								1	1	0	0	0		0	0	0	0	0	0
Geranium																				0	0	0	0	0		0	0	0	0	0	0
Gramineae	Gramineae												1	1	1	1				0	0	1	1	0		0	0	0	0	0	0
Gunnera	Gunnera														1	1				0	0	0	1	0		0	0	0	0	0	0
Hagenia abyssinica	Hagenia abyssinica					1														0	1	0	0	0		0	0	0	0	0	0
Holoptelea grandis	Holoptelea grandis											1								1	0	0	0	0		0	0	0	0	0	0
Hydrocotyle																				0	0	0	0	0		0	0	0	0	0	0
Ilex mitis	Ilex mitis					1														0	1	0	0	0		0	0	0	0	0	0
Impatiens	Impatiens					1														0	1	0	0	0		0	0	0	0	0	0
Indetermines																				0	0	0	0	0		0	0	0	0	0	0
Isoglossa	Isoglossa										1		1							1	0	1	0	0		0	0	0	0	0	0
Juniperus																				0	0	0	0	0		0	0	0	0	0	0
Labiatae	Labiatae											1	1							1	0	1	0	0		0	0	0	0	0	0
Laurembergia																				0	0	0	0	0		0	0	0	0	0	0
Liguliflorae	Compositae Liguliflorae															1	1			0	0	0	1	1		0	0	0	0	0	0
Liliaceae	Liliaceae												1	1	1	1	1			0	0	1	1	1		0	0	0	0	0	0
Lobelia	Lobelia															1				0	0	0	1	0		0	0	0	0	0	0
Macaranga	Macaranga					1			1	1										1	1	0	0	0		0	0	0	0	0	0
Malvaceae	Malvaceae											1								1	0	0	0	0		0	0	0	0	0	0
Mimulopsis-type																				0	0	0	0	0		0	0	0	0	0	0
Mitragyna																				0	0	0	0	0		0	0	0	0	0	0
Monoletes																				0	0	0	0	0		0	0	0	0	0	0
Moraceae	Moraceae					1			1	1	1	1								1	1	0	0	0		0	0	0	0	0	0
Myrica	Myrica					1									1					0	1	0	1	0		0	0	0	0	0	0
Myrsinaceae	Myrsinaceae					1						1	1							1	1	1	0	0		0	0	0	0	0	0
Myrsine																				0	0	0	0	0		0	0	0	0	0	0
Nuxia-type congesta	Nuxia											1			1	1				1	0	0	1	0		0	0	0	0	0	0
Olea	Olea					1	1					1			1					1	1	0	1	0		0	0	0	0	0	0
Plantago	Plantago															1	1			0	0	0	1	1		0	0	0	0	0	0
Podocarpus	Podocarpus					1														0	1	0	0	0		0	0	0	0	0	0
Polyscias-type	Polyscias fulva*					1														0	1	0	0	0		0	0	0	0	0	0
Prunus africana	Prunus africana					1				1	1									1	1	0	0	0		0	0	0	0	0	0
Rapanea																				0	0	0	0	0		0	0	0	0	0	0
Restionaceae	Restionaceae													1						0	0	0	1	0		0	0	0	0	0	0
Rhamnaceae	Rhamnaceae					1			1	1	1	1	1	1		1	1			1	1	1	1	1		0	0	0	0	0	0
Rubiaceae	Rubiaceae											1								1	0	0	0	0		0	0	0	0	0	0
Rubia-type	Rubia*										1	1	1							1	0	1	0	0		0	0	0	0	0	0
Rumex	Rumex					1						1	1		1					1	1	1	1	0		0	0	0	0	0	0
Schrebera																				0	0	0	0	0		0	0	0	0	0	0
Senecio-type mannii																				0	0	0	0	0		0	0	0	0	0	0
Sphagnum																				0	0	0	0	0		0	0	0	0	0	0
Stoebe kilimandscharica-type	Stoebe														1					0	0	0	1	0		0	0	0	0	0	0
Subularia-type monticola																				0	0	0	0	0		0	0	0	0	0	0
Syzygium-type	Syzygium*					1			1	1	1									1	1	0	0	0		0	0	0	0	0	0
Thalictrum																				0	0	0	0	0		0	0	0	0	0	0
Trema	Trema*					1					1	1	1							1	1	1	0	0		0	0	0	0	0	0
Triletes																				0	0	0	0	0		0	0	0	0	0	0
Tubuliflorae	Compositae Tubuliforae													1		1	1			0	0	0	1	1		0	0	0	0	0	0
Typha																				0	0	0	0	0		0	0	0	0	0	0
Umbelliferae	Umbellifera												1	1	1	1				0	0	1	1	0		0	0	0	0	0	0
Urticaceae	Urticaceae					1			1	1	1	1								1	1	0	0	0		0	0	0	0	0	0
Vernonieae	Compositae Vernonieae												1			1				0	0	1	1	0		0	0	0	0	0	0
Xyris																				0	0	0	0	0		0	0	0	0	0	0
Zanthoxylum usambarense-type	Zanthoxylum					1					1	1	1							1	1	1	0	0		0	0	0	0	0	0
																											0	0	0	0	0

## Sheet: Rusaka
	Taxa	pft																		MEGABIOMES							MEGABIOMES
		bs	ts	ts1	ts2	wte	wte2	ec	Te1	Te2	Tr1	Tr2	Tr3	Tss	tss	sf	df			tropical forest	warm-temperate forest	savanna and dry woodland	grassland and dry shrubland	desert		sqrt	tropical forest	warm-temperate forest	savanna and dry woodland	grassland and dry shrubland	desert
Acacia (type I)	Acacia											1	1	1	1	1				1	0	1	1	0		0	0	0	0	0	0
Acacia (type III)	Acacia											1	1	1	1	1				1	0	1	1	0		0	0	0	0	0	0
Acalypha	Acalypha										1	1	1							1	0	1	0	0		0	0	0	0	0	0
Acanthaceae undiff.	Acanthaceae											1	1	1	1	1				1	0	1	1	0		0	0	0	0	0	0
Acanthus-type	Acanthaceae											1	1	1	1	1				1	0	1	1	0		0	0	0	0	0	0
Achyranthes aspera-type	Achyranthes* aspera											1	1	1		1				1	0	1	1	0		0	0	0	0	0	0
Aeschynomene baumii-type	Aeschynomene* baumi								1	1										1	0	0	0	0		0	0	0	0	0	0
Afrocrania volkensii	Afrocrania					1														0	1	0	0	0		0	0	0	0	0	0
Aidia micrantha-type	Rubiaceae											1								1	0	0	0	0		0	0	0	0	0	0
Alchemilla	Alchemilla														1	1				0	0	0	1	0		0	0	0	0	0	0
Alchornea	Alchornea					1			1	1										1	1	0	0	0		0	0	0	0	0	0
Allophylus	Allophylus					1					1	1	1							1	1	1	0	0		0	0	0	0	0	0
Anacardiaceae undiff.	Anacardiaceae																			0	0	0	0	0		0	0	0	0	0	0
Anagallis-type	Primulaceae																			0	0	0	0	0		0	0	0	0	0	0
Anthocerotaceae																				0	0	0	0	0		0	0	0	0	0	0
Anthocleista	Anthocleista					1					1									1	1	0	0	0		0	0	0	0	0	0
Anthospermum	Anthospermum											1	1		1					1	0	1	1	0		0	0	0	0	0	0
Apiaceae undiff.																				0	0	0	0	0		0	0	0	0	0	0
Apodytes dimidiata	Apodytes dimidiata					1														0	1	0	0	0		0	0	0	0	0	0
Artemisia	Artemisia															1	1			0	0	0	1	1		0	0	0	0	0	0
Ascolepis	Cyperaceae																			0	0	0	0	0		0	0	0	0	0	0
Asteraceae subf. Asteroideae undiff.	Compositae												1	1		1	1			0	0	1	1	1		0	0	0	0	0	0
Asteraceae tribe Lactuceae	Compositae												1	1		1	1			0	0	1	1	1		0	0	0	0	0	0
Asteraceae tribe Vernonieae	Compositae Vernonieae												1			1				0	0	1	1	0		0	0	0	0	0	0
Baphiopsis parviflora	Leguminosae								1	1	1									1	0	0	0	0		0	0	0	0	0	0
Begonia																				0	0	0	0	0		0	0	0	0	0	0
Bersama abyssinica-type	Melianthaceae																			0	0	0	0	0		0	0	0	0	0	0
Blighia unijugata-type	Blighia					1					1									1	1	0	0	0		0	0	0	0	0	0
Brachystegia	Brachystegia											1	1							1	0	1	0	0		0	0	0	0	0	0
Brassicaceae																				0	0	0	0	0		0	0	0	0	0	0
Bridelia	Bridelia					1			1	1	1	1								1	1	0	0	0		0	0	0	0	0	0
Carduus	Compositae												1	1		1	1			0	0	1	1	1		0	0	0	0	0	0
Caryophyllaceae undiff.	Caryophyllaceae											1								1	0	0	0	0		0	0	0	0	0	0
Cassia mimosoides-type	Cassia*												1	1		1				0	0	1	1	0		0	0	0	0	0	0
Celastraceae/Hippocrateaceae	Celastraceae/Hippocrateaceae					1			1	1	1	1								1	1	0	0	0		0	0	0	0	0	0
Celosia trigyna-type	Celosia* trigyna											1								1	0	0	0	0		0	0	0	0	0	0
Celtis	Celtis					1					1	1								1	1	0	0	0		0	0	0	0	0	0
Cerastium afromontanum-type	Caryophyllaceae											1								1	0	0	0	0		0	0	0	0	0	0
Cerastium octandrum-type	Caryophyllaceae											1								1	0	0	0	0		0	0	0	0	0	0
Chenopodiaceae	Chenopodiaceae															1	1			0	0	0	1	1		0	0	0	0	0	0
Chenopodiaceae/Amaranthaceae undiff.	Amaranthaceae/Chenopodiaceae													1		1	1			0	0	0	1	1		0	0	0	0	0	0
Chrysophyllum bangweolense-type	Sapotaceae					1			1	1	1	1	1							1	1	1	0	0		0	0	0	0	0	0
Clausena anisata	Rutaceae					1			1	1										1	1	0	0	0		0	0	0	0	0	0
Clematis	Clematis*											1	1							1	0	1	0	0		0	0	0	0	0	0
Cliffortia nitidula-type	Cliffortia														1					0	0	0	1	0		0	0	0	0	0	0
Clutia	Clutia															1				0	0	0	1	0		0	0	0	0	0	0
Combretaceae	Combretaceae/Melastomataceae					1			1	1	1	1	1	1						1	1	1	1	0		0	0	0	0	0	0
Commelina benghalensis-type	Commelina* benghalensis															1				0	0	0	1	0		0	0	0	0	0	0
Commiphora edulis-type	Commiphora												1	1	1	1				0	0	1	1	0		0	0	0	0	0	0
Crassocephalum montuosum-type	Compositae												1	1		1	1			0	0	1	1	1		0	0	0	0	0	0
Croton	Croton					1					1	1	1		1					1	1	1	1	0		0	0	0	0	0	0
Cucurbitaceae	Cucurbitaceae												1	1		1				0	0	1	1	0		0	0	0	0	0	0
Cyperaceae undiff.																				0	0	0	0	0		0	0	0	0	0	0
Diospyros	Diospyros					1						1	1							1	1	1	0	0		0	0	0	0	0	0
Dipsacaceae																				0	0	0	0	0		0	0	0	0	0	0
Dodonaea viscosa-type	Dodonaea viscosa					1					1	1			1					1	1	0	1	0		0	0	0	0	0	0
Dombeya-type	Dombeya					1						1	1		1					1	1	1	1	0		0	0	0	0	0	0
Dracaena steudneri	Dracaena steudneri*										1	1								1	0	0	0	0		0	0	0	0	0	0
Drosera																				0	0	0	0	0		0	0	0	0	0	0
Ekebergia-type	Ekebergia*					1			1	1	1	1								1	1	0	0	0		0	0	0	0	0	0
Entada-type	Entada*					1			1	1	1	1								1	1	0	0	0		0	0	0	0	0	0
Ericaceae	Ericaceae														1					0	0	0	1	0		0	0	0	0	0	0
Eriocaulaceae	Eriocaulaceae										1									1	0	0	0	0		0	0	0	0	0	0
Euclea	Euclea					1						1	1	1	1					1	1	1	1	0		0	0	0	0	0	0
Euphorbia	Euphorbia					1						1	1	1		1				1	1	1	1	0		0	0	0	0	0	0
Fabaceae undiff.	Leguminosae								1	1	1									1	0	0	0	0		0	0	0	0	0	0
Ficus	Ficus								1	1	1	1								1	0	0	0	0		0	0	0	0	0	0
Flabellaria paniculata-type	Malpighiaceae																			0	0	0	0	0		0	0	0	0	0	0
Galiniera saxifraga-type	Rubiaceae											1								1	0	0	0	0		0	0	0	0	0	0
Garcinia volkensii-type	Clusiaceae																			0	0	0	0	0		0	0	0	0	0	0
Geranium	Geraniaceae															1	1			0	0	0	1	1		0	0	0	0	0	0
Hagenia abyssinica	Hagenia abyssinica					1														0	1	0	0	0		0	0	0	0	0	0
Hallea rubrostipulata-type	Hallea* rubrosipulata												1							0	0	1	0	0		0	0	0	0	0	0
Harungana	Hypericaceae																			0	0	0	0	0		0	0	0	0	0	0
Hydrocotyle	Apiaceae																			0	0	0	0	0		0	0	0	0	0	0
Hymenocardia	Hymenocardia										1	1								1	0	0	0	0		0	0	0	0	0	0
Hymenodictyon floribundum-type	Hymenodictyon* floribundum					1						1	1							1	1	1	0	0		0	0	0	0	0	0
Hypericum	Hypericum											1								1	0	0	0	0		0	0	0	0	0	0
Hypoestes-type	Hypoestes*											1								1	0	0	0	0		0	0	0	0	0	0
Ilex mitis	Ilex mitis					1														0	1	0	0	0		0	0	0	0	0	0
Impatiens	Impatiens					1														0	1	0	0	0		0	0	0	0	0	0
Indeterminable																				0	0	0	0	0		0	0	0	0	0	0
Ipomoea-type	Ipomoea*												1	1		1				0	0	1	1	0		0	0	0	0	0	0
Isoglossa	Isoglossa										1		1							1	0	1	0	0		0	0	0	0	0	0
Jasminum	Oleaceae					1						1			1					1	1	0	1	0		0	0	0	0	0	0
Justicia striata-type	Justicia striata*											1								1	0	0	0	0		0	0	0	0	0	0
Keetia gueinzii-type	Rubiaceae											1								1	0	0	0	0		0	0	0	0	0	0
Kotschya-type	Leguminosae								1	1	1									1	0	0	0	0		0	0	0	0	0	0
Lamiaceae undiff.																				0	0	0	0	0		0	0	0	0	0	0
Lannea-type	Anarardiaceae																			0	0	0	0	0		0	0	0	0	0	0
Laportea aestuans-type	Urticaceae					1			1	1	1	1								1	1	0	0	0		0	0	0	0	0	0
Laurembergia tetrandra	Laurembergia tetrandra								1		1									1	0	0	0	0		0	0	0	0	0	0
Leucas-type	Lamiaceae																			0	0	0	0	0		0	0	0	0	0	0
Liliopsida undiff.																				0	0	0	0	0		0	0	0	0	0	0
Lobelia	Lobelia															1				0	0	0	1	0		0	0	0	0	0	0
Loranthaceae	Lorantaceae								1	1										1	0	0	0	0		0	0	0	0	0	0
Lythrum	Lythraceae																			0	0	0	0	0		0	0	0	0	0	0
Macaranga-type	Macaranga					1			1	1										1	1	0	0	0		0	0	0	0	0	0
Maerua-type	Maerua*												1	1		1	1			0	0	1	1	1		0	0	0	0	0	0
Maesa lanceolata-type	Maesa lanceolata										1	1								1	0	0	0	0		0	0	0	0	0	0
Margaritaria discoidea-type	Margaritaria* discoidea								1	1										1	0	0	0	0		0	0	0	0	0	0
Melastomataceae																				0	0	0	0	0		0	0	0	0	0	0
Mimulopsis-type	Acanthaceae											1	1	1	1	1				1	0	1	1	0		0	0	0	0	0	0
Moraceae undiff.	Moraceae					1			1	1	1	1								1	1	0	0	0		0	0	0	0	0	0
Myrianthus holstii-type	Urticaceae					1			1	1	1	1								1	1	0	0	0		0	0	0	0	0	0
Myrica	Myrica					1									1					0	1	0	1	0		0	0	0	0	0	0
Nuxia/Ficalhoa	Nuxia											1			1	1				1	0	0	1	0		0	0	0	0	0	0
Oldenlandia-type	Rubiaceae											1								1	0	0	0	0		0	0	0	0	0	0
Olea capensis-type	Olea capensis					1					1									1	1	0	0	0		0	0	0	0	0	0
Olea europaea-type	Olea europaea					1	1					1								1	1	0	0	0		0	0	0	0	0	0
Osmunda regalis	Osmondaceae																			0	0	0	0	0		0	0	0	0	0	0
Parinari-type	Parinari*										1	1								1	0	0	0	0		0	0	0	0	0	0
Phoenix reclinata-type	Phoenix reclinata									1	1									1	0	0	0	0		0	0	0	0	0	0
Phyllanthus niruri-type	Phyllanthus					1			1	1	1	1								1	1	0	0	0		0	0	0	0	0	0
Phyllanthus rivae-type	Phyllanthus					1			1	1	1	1								1	1	0	0	0		0	0	0	0	0	0
Pilea bambuseti-type	Urticaceae					1			1	1	1	1								1	1	0	0	0		0	0	0	0	0	0
Plantago africana-type	Plantago															1	1			0	0	0	1	1		0	0	0	0	0	0
Poaceae	Gramineae												1	1	1	1				0	0	1	1	0		0	0	0	0	0	0
Podocarpus	Podocarpus					1														0	1	0	0	0		0	0	0	0	0	0
Polygala																				0	0	0	0	0		0	0	0	0	0	0
Polygonum nepalense-type																				0	0	0	0	0		0	0	0	0	0	0
Polygonum senegalense-type																				0	0	0	0	0		0	0	0	0	0	0
Polyscias fulva-type	Polyscias fulva*					1														0	1	0	0	0		0	0	0	0	0	0
Potamogeton thunbergii-type																				0	0	0	0	0		0	0	0	0	0	0
Protea-type	Protea													1						0	0	0	1	0		0	0	0	0	0	0
Prunus africana-type	Prunus africana					1				1	1									1	1	0	0	0		0	0	0	0	0	0
Psydrax schimperiana-type	Rubiaceae											1								1	0	0	0	0		0	0	0	0	0	0
Ranunculus	Ranunculus															1				0	0	0	1	0		0	0	0	0	0	0
Rapanea melanophloeos-type	Rapanea melanophloeos					1														0	1	0	0	0		0	0	0	0	0	0
Resedaceae	Resedaceae																1			0	0	0	0	1		0	0	0	0	0	0
Rhamnaceae	Rhamnaceae					1			1	1	1	1	1	1		1	1			1	1	1	1	1		0	0	0	0	0	0
Rhus	Anacardiaceae																			0	0	0	0	0		0	0	0	0	0	0
Ricinus communis	Ricinus communis					1					1									1	1	0	0	0		0	0	0	0	0	0
Rubiaceae undiff.	Rubiaceae											1								1	0	0	0	0		0	0	0	0	0	0
Rubia-type	Rubia*										1	1	1							1	0	1	0	0		0	0	0	0	0	0
Rubus pinnatus-type	Rosaceae																			0	0	0	0	0		0	0	0	0	0	0
Rumex	Rumex					1						1	1		1					1	1	1	1	0		0	0	0	0	0	0
Sapotaceae undiff.	Sapotaceae					1			1	1	1	1	1							1	1	1	0	0		0	0	0	0	0	0
Schefflera abyssinica-type	Araliaceae																			0	0	0	0	0		0	0	0	0	0	0
Schefflera myriantha-type	Schefflera myriantha*					1									1	1				0	1	0	1	0		0	0	0	0	0	0
Sebaea brachyphylla-type	Gentianaceae																			0	0	0	0	0		0	0	0	0	0	0
Securinega virosa-type	Securinega* virosa											1	1							1	0	1	0	0		0	0	0	0	0	0
Senecio mannii-type	Compositae												1	1		1	1			0	0	1	1	1		0	0	0	0	0	0
Sericostachys scandens-type	Seriostachys scandens					1														0	1	0	0	0		0	0	0	0	0	0
Shirakia elliptica-type	Euphorbiaceae																			0	0	0	0	0		0	0	0	0	0	0
Silene burchellii-type	Caryophyllaceae											1								1	0	0	0	0		0	0	0	0	0	0
Smithia elliotii-type	Leguminosae								1	1	1									1	0	0	0	0		0	0	0	0	0	0
Solanum	Solanum											1	1	1						1	0	1	1	0		0	0	0	0	0	0
Spermacoce-type	Spermacoce*												1	1		1				0	0	1	1	0		0	0	0	0	0	0
Sphagnum																				0	0	0	0	0		0	0	0	0	0	0
Spore (monolete)																				0	0	0	0	0		0	0	0	0	0	0
Spore (trilete)																				0	0	0	0	0		0	0	0	0	0	0
Stellaria mannii-type	Caryophyllaceae											1								1	0	0	0	0		0	0	0	0	0	0
Stephania abyssinica-type	Stephania* abyssinica											1								1	0	0	0	0		0	0	0	0	0	0
Sterculia-type	Sterculia*					1					1	1	1							1	1	1	0	0		0	0	0	0	0	0
Swertia usambarensis-type	Gentianaceae																			0	0	0	0	0		0	0	0	0	0	0
Symphonia globulifera	Symphonia globulifera										1									1	0	0	0	0		0	0	0	0	0	0
Syzygium-type	Syzygium*					1			1	1	1									1	1	0	0	0		0	0	0	0	0	0
Teclea-type	Teclea*										1	1	1		1					1	0	1	1	0		0	0	0	0	0	0
Tetrorchidium	Tetrorchidium					1					1	1								1	1	0	0	0		0	0	0	0	0	0
Thalictrum	Ranunculaceae																			0	0	0	0	0		0	0	0	0	0	0
Thymelaeaceae	Thymeleaceae					1							1	1	1					0	1	1	1	0		0	0	0	0	0	0
Tiliaceae	Tiliaceae											1	1	1		1				1	0	1	1	0		0	0	0	0	0	0
Tiliacora funifera-type	Menispermaceae								1	1										1	0	0	0	0		0	0	0	0	0	0
Toddalia asiatica-type	Rutaceae					1			1	1										1	1	0	0	0		0	0	0	0	0	0
Trema orientalis-type	Trema*					1					1	1	1							1	1	1	0	0		0	0	0	0	0	0
Trilepisium madagascariense-type	Trilepisium* madagascariensis									1	1									1	0	0	0	0		0	0	0	0	0	0
Typha																				0	0	0	0	0		0	0	0	0	0	0
Uapaca kirkiana-type	Uapaca					1			1	1	1	1	1							1	1	1	0	0		0	0	0	0	0	0
Uapaca undiff.	Uapaca					1			1	1	1	1	1							1	1	1	0	0		0	0	0	0	0	0
Uebelinia abyssinica-type	Caryophyllaceae											1								1	0	0	0	0		0	0	0	0	0	0
Urticaceae undiff.	Urticaceae					1			1	1	1	1								1	1	0	0	0		0	0	0	0	0	0
Vangueria madagascariensis-type	Rubiaceae											1								1	0	0	0	0		0	0	0	0	0	0
Vigna luteola-type	Vigna* luteola											1								1	0	0	0	0		0	0	0	0	0	0
Virectaria	Rubiaceae											1								1	0	0	0	0		0	0	0	0	0	0
Xyris	Xyridaceae																			0	0	0	0	0		0	0	0	0	0	0
Zanha golungensis-type	Sapindaceae										1	1								1	0	0	0	0		0	0	0	0	0	0
Zanthoxylum chalybeum-type	Zanthoxylum					1					1	1	1							1	1	1	0	0		0	0	0	0	0	0
Zanthoxylum usambarense-type	Zanthoxylum					1					1	1	1							1	1	1	0	0		0	0	0	0	0	0
																											0	0	0	0	0

## Sheet: Kashiru 1
		pft																		MEGABIOMES							MEGABIOMES
		bs	ts	ts1	ts2	wte	wte2	ec	Te1	Te2	Tr1	Tr2	Tr3	Tss	tss	sf	df			tropical forest	warm-temperate forest	savanna and dry woodland	grassland and dry shrubland	desert		SQRT	tropical forest	warm-temperate forest	savanna and dry woodland	grassland and dry shrubland	desert
Acacia group III	Acacia											1	1	1	1	1				1	0	1	1	0		0	0	0	0	0	0
Acalypha	Acalypha										1	1	1							1	0	1	0	0		0	0	0	0	0	0
Acanthaceae	Acanthaceae											1	1	1	1	1				1	0	1	1	0		0	0	0	0	0	0
Achyranthes-type apera	Achyranthes* aspera											1	1	1		1				1	0	1	1	0		0	0	0	0	0	0
Aeschynomene-type baumii	Aeschynomene* baumi								1	1										1	0	0	0	0		0	0	0	0	0	0
Afrocrania volkensii	Afrocrania					1														0	1	0	0	0		0	0	0	0	0	0
Alchemilla	Alchemilla														1	1				0	0	0	1	0		0	0	0	0	0	0
Alchornea	Alchornea					1			1	1										1	1	0	0	0		0	0	0	0	0	0
Allophylus	Allophylus					1					1	1	1							1	1	1	0	0		0	0	0	0	0	0
Aloe-type	Aloe												1	1	1	1	1			0	0	1	1	1		0	0	0	0	0	0
Amannia-type prieureana																				0	0	0	0	0		0	0	0	0	0	0
Amaranthaceae/Chenopodiaceae	Amaranthaceae/Chenopodiaceae													1		1	1			0	0	0	1	1		0	0	0	0	0	0
Anthocerotaceae																				0	0	0	0	0		0	0	0	0	0	0
Anthocleista	Anthocleista					1					1									1	1	0	0	0		0	0	0	0	0	0
Anthospermum	Anthospermum											1	1		1					1	0	1	1	0		0	0	0	0	0	0
Apodytes dimidiata	Apodytes dimidiata					1														0	1	0	0	0		0	0	0	0	0	0
Araliaceae																				0	0	0	0	0		0	0	0	0	0	0
Artemisia	Artemisia															1	1			0	0	0	1	1		0	0	0	0	0	0
Ascolepis	Cyperaceae																			0	0	0	0	0		0	0	0	0	0	0
Basella alba-type																				0	0	0	0	0		0	0	0	0	0	0
Basilicum-type																				0	0	0	0	0		0	0	0	0	0	0
Begonia																				0	0	0	0	0		0	0	0	0	0	0
Brachystegia	Brachystegia											1	1							1	0	1	0	0		0	0	0	0	0	0
Brucea antidysenterica	Brucea					1					1									1	1	0	0	0		0	0	0	0	0	0
Caesalpinioideae	Caesalpinioideae								1	1	1	1								1	0	0	0	0		0	0	0	0	0	0
Canthium gueinzii-type	Canthium					1			1	1	1	1								1	1	0	0	0		0	0	0	0	0	0
Canthium schimperianum	Canthium					1			1	1	1	1								1	1	0	0	0		0	0	0	0	0	0
Capitanya-type otostegioides																				0	0	0	0	0		0	0	0	0	0	0
Carduus-type	Compositae												1	1		1	1			0	0	1	1	1		0	0	0	0	0	0
Caryophyllaceae	Caryophyllaceae											1								1	0	0	0	0		0	0	0	0	0	0
Cassia-type mimosoides	Cassia*												1	1		1				0	0	1	1	0		0	0	0	0	0	0
Celosia-type trigyna	Amaranthaceae/Chenopodiaceae													1		1	1			0	0	0	1	1		0	0	0	0	0	0
Celtis	Celtis					1					1	1								1	1	0	0	0		0	0	0	0	0	0
Cerastium afromontanum-type	Caryophyllaceae											1								1	0	0	0	0		0	0	0	0	0	0
Cerastium-type octandrum	Caryophyllaceae											1								1	0	0	0	0		0	0	0	0	0	0
Chenopodiaceae	Amaranthaceae/Chenopodiaceae													1		1	1			0	0	0	1	1		0	0	0	0	0	0
Clematis-type	Clematis*											1	1							1	0	1	0	0		0	0	0	0	0	0
Cliffortia nitidula	Rosaceae																			0	0	0	0	0		0	0	0	0	0	0
Clutia	Clutia															1				0	0	0	1	0		0	0	0	0	0	0
Combretaceae	Combretaceae/Melastomataceae					1			1	1	1	1	1	1						1	1	1	1	0		0	0	0	0	0	0
Commelina-type benghalensis	Commelinaceae					1						1	1	1	1	1				1	1	1	1	0		0	0	0	0	0	0
Commiphora	Commiphora												1	1	1	1				0	0	1	1	0		0	0	0	0	0	0
Commiphora boiviniana-type	Commiphora												1	1	1	1				0	0	1	1	0		0	0	0	0	0	0
Crassocephalum-type montuosum	Compositae												1	1		1	1			0	0	1	1	1		0	0	0	0	0	0
Croton-type	Croton					1					1	1	1		1					1	1	1	1	0		0	0	0	0	0	0
Cruciferae	Cruciferae																1			0	0	0	0	1		0	0	0	0	0	0
Cucurbitaceae	Cucurbitaceae												1	1		1				0	0	1	1	0		0	0	0	0	0	0
Cyathula-type orthacantha	Cyanthula* orthacantha											1	1							1	0	1	0	0		0	0	0	0	0	0
Cyperaceae	Cyperaceae																			0	0	0	0	0		0	0	0	0	0	0
Dichondra-type micrantha	Convolvulaceae										1	1	1							1	0	1	0	0		0	0	0	0	0	0
Diospyros	Diospyros					1						1	1							1	1	1	0	0		0	0	0	0	0	0
Dipsacaceae																				0	0	0	0	0		0	0	0	0	0	0
Dodonaea viscosa	Dodonaea viscosa					1					1	1			1					1	1	0	1	0		0	0	0	0	0	0
Dombeya-type	Dombeya					1						1	1		1					1	1	1	1	0		0	0	0	0	0	0
Ekebergia-type	Ekebergia*					1			1	1	1	1								1	1	0	0	0		0	0	0	0	0	0
Embelia	Myrsinaceae					1						1	1							1	1	1	0	0		0	0	0	0	0	0
Entada-type	Entada*					1			1	1	1	1								1	1	0	0	0		0	0	0	0	0	0
Ericaceae	Ericaceae														1					0	0	0	1	0		0	0	0	0	0	0
Eriocaulaceae	Eriocaulaceae										1									1	0	0	0	0		0	0	0	0	0	0
Erythrococca-type	Erythrococca*											1								1	0	0	0	0		0	0	0	0	0	0
Euclea	Euclea					1						1	1	1	1					1	1	1	1	0		0	0	0	0	0	0
Euphorbia hirta-type	Euphorbia hirta*											1			1					1	0	0	1	0		0	0	0	0	0	0
Euphorbia	Euphorbia					1						1	1	1		1				1	1	1	1	0		0	0	0	0	0	0
Ficus	Ficus								1	1	1	1								1	0	0	0	0		0	0	0	0	0	0
Flabellaria-type paniculata	Malpighiaceae																			0	0	0	0	0		0	0	0	0	0	0
Galiniera coffeoides	Rubiaceae											1								1	0	0	0	0		0	0	0	0	0	0
Garcinia volkensii-type	Clusiaceae																			0	0	0	0	0		0	0	0	0	0	0
Gentianaceae	Gentianaceae																			0	0	0	0	0		0	0	0	0	0	0
Geranium	Geraniaceae															1	1			0	0	0	1	1		0	0	0	0	0	0
Gramineae	Gramineae												1	1	1	1				0	0	1	1	0		0	0	0	0	0	0
Hagenia abyssinica	Hagenia abyssinica					1														0	1	0	0	0		0	0	0	0	0	0
Hallea-type rubrostipulata	Hallea* rubrosipulata												1							0	0	1	0	0		0	0	0	0	0	0
Harungana	Clusiaceae																			0	0	0	0	0		0	0	0	0	0	0
Heliotropium steudneri-type	Boraginaceae																			0	0	0	0	0		0	0	0	0	0	0
Hydrocotyle																				0	0	0	0	0		0	0	0	0	0	0
Hymenodictyon-type floribundum	Hymenodictyon* floribundum					1						1	1							1	1	1	0	0		0	0	0	0	0	0
Hypericum	Hypericum											1								1	0	0	0	0		0	0	0	0	0	0
Hypoestes-type	Hypoestes*											1								1	0	0	0	0		0	0	0	0	0	0
Ilex mitis	Ilex mitis					1														0	1	0	0	0		0	0	0	0	0	0
Impatiens	Impatiens					1														0	1	0	0	0		0	0	0	0	0	0
Indetermines																				0	0	0	0	0		0	0	0	0	0	0
Ipomaea-type	Ipomoea*												1	1		1				0	0	1	1	0		0	0	0	0	0	0
Isoglossa	Isoglossa										1		1							1	0	1	0	0		0	0	0	0	0	0
Jasminum	Oleaceae					1						1			1					1	1	0	1	0		0	0	0	0	0	0
Juniperus procera	Juniperus procera					1									1					0	1	0	1	0		0	0	0	0	0	0
Kotschya-type	Fabaceae																			0	0	0	0	0		0	0	0	0	0	0
Labiatae	Labiatae											1	1							1	0	1	0	0		0	0	0	0	0	0
Lactuceae	Compositae												1	1		1	1			0	0	1	1	1		0	0	0	0	0	0
Lannea-type	Anacardiaceae																			0	0	0	0	0		0	0	0	0	0	0
Laurembergia tetrandra	Laurembergia tetrandra								1		1									1	0	0	0	0		0	0	0	0	0	0
Leucas-type																				0	0	0	0	0		0	0	0	0	0	0
Liguliflorae	Compositae Liguliflorae															1	1			0	0	0	1	1		0	0	0	0	0	0
Lobelia	Lobelia															1				0	0	0	1	0		0	0	0	0	0	0
Loranthaceae	Lorantaceae								1	1										1	0	0	0	0		0	0	0	0	0	0
Lythrum	Lythraceae																			0	0	0	0	0		0	0	0	0	0	0
Macaranga	Macaranga					1			1	1										1	1	0	0	0		0	0	0	0	0	0
Maerua-type	Maerua*												1	1		1	1			0	0	1	1	1		0	0	0	0	0	0
Maesa lanceolata-type	Maesa lanceolata										1	1								1	0	0	0	0		0	0	0	0	0	0
Margaritaria-type discoidea	Margaritaria* discoidea								1	1										1	0	0	0	0		0	0	0	0	0	0
Melastomataceae																				0	0	0	0	0		0	0	0	0	0	0
Mimulopsis-type	Acanthaceae											1	1	1	1	1				1	0	1	1	0		0	0	0	0	0	0
Monocotyledoneae																				0	0	0	0	0		0	0	0	0	0	0
Monoletes																				0	0	0	0	0		0	0	0	0	0	0
Moraceae	Moraceae					1			1	1	1	1								1	1	0	0	0		0	0	0	0	0	0
Myrica	Myrica					1									1					0	1	0	1	0		0	0	0	0	0	0
Myrsine africana	Myrsinaceae					1						1	1							1	1	1	0	0		0	0	0	0	0	0
Nuxia/Ficalhoa	Nuxia											1			1	1				1	0	0	1	0		0	0	0	0	0	0
Nymphaea lotus-type	Nymphaeaceae																			0	0	0	0	0		0	0	0	0	0	0
Oldenlandia-type	Rubiaceae											1								1	0	0	0	0		0	0	0	0	0	0
Olea capensis	Olea capensis					1					1									1	1	0	0	0		0	0	0	0	0	0
Olea europaea	Olea europaea					1	1					1								1	1	0	0	0		0	0	0	0	0	0
Onagraceae	Onagraceae															1	1			0	0	0	1	1		0	0	0	0	0	0
Ormocarpum-type trichocarpum	Ormocarpum* trichocarpum											1	1							1	0	1	0	0		0	0	0	0	0	0
Papilionoideae	Papilionoideae					1			1	1	1	1								1	1	0	0	0		0	0	0	0	0	0
Parinari-type	Parinari*										1	1								1	0	0	0	0		0	0	0	0	0	0
Phoenix reclinata	Phoenix reclinata									1	1									1	0	0	0	0		0	0	0	0	0	0
Phyllanthus-type muellerianus	Phyllanthus					1			1	1	1	1								1	1	0	0	0		0	0	0	0	0	0
Phyllanthus-type niruri	Phyllanthus					1			1	1	1	1								1	1	0	0	0		0	0	0	0	0	0
Phyllanthus-type reticularus	Phyllanthus					1			1	1	1	1								1	1	0	0	0		0	0	0	0	0	0
Phyllanthus-type rivae	Phyllanthus					1			1	1	1	1								1	1	0	0	0		0	0	0	0	0	0
Phyllanthus-type nummulariifolius	Phyllanthus					1			1	1	1	1								1	1	0	0	0		0	0	0	0	0	0
Pilea-type bambuseti	Urticaceae					1			1	1	1	1								1	1	0	0	0		0	0	0	0	0	0
Plantago africana-type	Plantago															1	1			0	0	0	1	1		0	0	0	0	0	0
Podocarpus	Podocarpus					1														0	1	0	0	0		0	0	0	0	0	0
Polygala-type																				0	0	0	0	0		0	0	0	0	0	0
Polygonum nepalense-type																				0	0	0	0	0		0	0	0	0	0	0
Polygonum senegalense-type																				0	0	0	0	0		0	0	0	0	0	0
Polyscias fulva-type	Araliaceae																			0	0	0	0	0		0	0	0	0	0	0
Potamogeton thunbergii-type																				0	0	0	0	0		0	0	0	0	0	0
Primulaceae																				0	0	0	0	0		0	0	0	0	0	0
Protea-type	Protea													1						0	0	0	1	0		0	0	0	0	0	0
Prunus africana	Prunus africana					1				1	1									1	1	0	0	0		0	0	0	0	0	0
Ranunculus	Ranunculus															1				0	0	0	1	0		0	0	0	0	0	0
Rapanea melanophloeos	Myrsinaceae					1						1	1							1	1	1	0	0		0	0	0	0	0	0
Resedaceae																				0	0	0	0	0		0	0	0	0	0	0
Restio	Restio													1						0	0	0	1	0		0	0	0	0	0	0
Rhamnaceae	Rhamnaceae					1			1	1	1	1	1	1		1	1			1	1	1	1	1		0	0	0	0	0	0
Ricinus communis	Ricinus communis					1					1									1	1	0	0	0		0	0	0	0	0	0
Rubiaceae	Rubiaceae											1								1	0	0	0	0		0	0	0	0	0	0
Rubia-type	Rubia*										1	1	1							1	0	1	0	0		0	0	0	0	0	0
Rubus pinnatus-type	Rosaceae																			0	0	0	0	0		0	0	0	0	0	0
Rumex	Rumex					1						1	1		1					1	1	1	1	0		0	0	0	0	0	0
Salix subserrata	Salix	1	1																	0	1	0	0	0		0	0	0	0	0	0
Sapotaceae	Sapotaceae					1			1	1	1	1	1							1	1	1	0	0		0	0	0	0	0	0
Schefflera abyssinica-type	Araliaceae																			0	0	0	0	0		0	0	0	0	0	0
Schefflera myriantha-type	Schefflera myriantha*					1									1	1				0	1	0	1	0		0	0	0	0	0	0
Senecio-type mannii	Compositae												1	1		1	1			0	0	1	1	1		0	0	0	0	0	0
Sericostachys-type scandens	Seriostachys scandens					1														0	1	0	0	0		0	0	0	0	0	0
Silene-type burchellii	Caryophyllaceae											1								1	0	0	0	0		0	0	0	0	0	0
Solanum	Solanum											1	1	1						1	0	1	1	0		0	0	0	0	0	0
Sphagnum																				0	0	0	0	0		0	0	0	0	0	0
Stellaria mannii-type	Caryophyllaceae											1								1	0	0	0	0		0	0	0	0	0	0
Stephania-type abyssinica	Stephania* abyssinica											1								1	0	0	0	0		0	0	0	0	0	0
Sterculia-type	Sterculia*					1					1	1	1							1	1	1	0	0		0	0	0	0	0	0
Stoebe kilimandscharica-type	Stoebe														1					0	0	0	1	0		0	0	0	0	0	0
Swertia usambarensis-type	Gentiaceae																			0	0	0	0	0		0	0	0	0	0	0
Swertia-type kilimandscharica	Gentiaceae																			0	0	0	0	0		0	0	0	0	0	0
Syzygium-type	Syzygium*					1			1	1	1									1	1	0	0	0		0	0	0	0	0	0
Tarenna-type graveolens	Rubiaceae											1								1	0	0	0	0		0	0	0	0	0	0
Teclea-type	Teclea*										1	1	1		1					1	0	1	1	0		0	0	0	0	0	0
Tetrorchidium	Tetrorchidium					1					1	1								1	1	0	0	0		0	0	0	0	0	0
Thymeleaceae	Thymeleaceae					1							1	1	1					0	1	1	1	0		0	0	0	0	0	0
Tiliaceae	Tiliaceae											1	1	1		1				1	0	1	1	0		0	0	0	0	0	0
Trema-type orientalis	Trema*					1					1	1	1							1	1	1	0	0		0	0	0	0	0	0
Triletes																				0	0	0	0	0		0	0	0	0	0	0
Tubuliflorae	Compositae Tubuliforae													1		1	1			0	0	0	1	1		0	0	0	0	0	0
Typha																				0	0	0	0	0		0	0	0	0	0	0
Uapaca	Uapaca					1			1	1	1	1	1							1	1	1	0	0		0	0	0	0	0	0
Uebelinia-type abyssinica	Caryophyllaceae											1								1	0	0	0	0		0	0	0	0	0	0
Umbelliferae	Umbellifera												1	1	1	1				0	0	1	1	0		0	0	0	0	0	0
Urticaceae	Urticaceae					1			1	1	1	1								1	1	0	0	0		0	0	0	0	0	0
Vangueria-type acutiloba	Vangueria* acutiloba											1								1	0	0	0	0		0	0	0	0	0	0
Vernonia perrottetii-type	Vernonia																			0	0	0	0	0		0	0	0	0	0	0
Vernonieae	Compositae Vernonieae												1			1				0	0	1	1	0		0	0	0	0	0	0
Virectaria	Rubiaceae											1								1	0	0	0	0		0	0	0	0	0	0
Xyris	Zyridaceae																			0	0	0	0	0		0	0	0	0	0	0
Zanthoxylum chalybeum-type	Zanthoxylum					1					1	1	1							1	1	1	0	0		0	0	0	0	0	0
Zanthoxylum usambarense-type	Zanthoxylum					1					1	1	1							1	1	1	0	0		0	0	0	0	0	0
																											0	0	0	0	0

## Sheet: Kashiru 3
		pft																		MEGABIOMES							MEGABIOMES
		bs	ts	ts1	ts2	wte	wte2	ec	Te1	Te2	Tr1	Tr2	Tr3	Tss	tss	sf	df			tropical forest	warm-temperate forest	savanna and dry woodland	grassland and dry shrubland	desert		SQRT	tropical forest	warm-temperate forest	savanna and dry woodland	grassland and dry shrubland	desert
Acalypha	Acacia											1	1	1	1	1				1	0	1	1	0		0	0	0	0	0	0
Aerva-type lanata	Aerva* lanata															1	1			0	0	0	1	1		0	0	0	0	0	0
Aeschynomene-type baumii	Aeschynomene* baumi								1	1										1	0	0	0	0		0	0	0	0	0	0
Afrocrania volkensii	Afrocrania					1														0	1	0	0	0		0	0	0	0	0	0
Alchemilla	Alchemilla														1	1				0	0	0	1	0		0	0	0	0	0	0
Alchornea	Alchornea					1			1	1										1	1	0	0	0		0	0	0	0	0	0
Allophylus	Allophylus					1					1	1	1							1	1	1	0	0		0	0	0	0	0	0
Aloe-type	Aloe												1	1	1	1	1			0	0	1	1	1		0	0	0	0	0	0
Amaranthaceae/Chenopodiaceae	Amaranthaceae/Chenopodiaceae													1		1	1			0	0	0	1	1		0	0	0	0	0	0
Anagallis-type	Primulaceae																			0	0	0	0	0		0	0	0	0	0	0
Anthocerotaceae																				0	0	0	0	0		0	0	0	0	0	0
Anthocleista	Anthocleista					1					1									1	1	0	0	0		0	0	0	0	0	0
Anthospermum	Anthospermum											1	1		1					1	0	1	1	0		0	0	0	0	0	0
Apodytes dimidiata	Apodytes dimidiata					1														0	1	0	0	0		0	0	0	0	0	0
Artemisia	Artemisia															1	1			0	0	0	1	1		0	0	0	0	0	0
Ascolepis	Cyperaceae																			0	0	0	0	0		0	0	0	0	0	0
Begonia	Begoniaceae																			0	0	0	0	0		0	0	0	0	0	0
Bersama abyssinica	Melianthaceae																			0	0	0	0	0		0	0	0	0	0	0
Brachystegia	Brachystegia											1	1							1	0	1	0	0		0	0	0	0	0	0
Bridelia	Bridelia					1			1	1	1	1								1	1	0	0	0		0	0	0	0	0	0
Canthium gueinzii-type	Canthium					1			1	1	1	1								1	1	0	0	0		0	0	0	0	0	0
Canthium schimperianum	Canthium					1			1	1	1	1								1	1	0	0	0		0	0	0	0	0	0
Carduus-type	Compositae												1	1		1	1			0	0	1	1	1		0	0	0	0	0	0
Cassia-type mimosoides	Cassia*												1	1		1				0	0	1	1	0		0	0	0	0	0	0
Celtis	Celtis					1					1	1								1	1	0	0	0		0	0	0	0	0	0
Cerastium-type octandrum	Caryophyllaceae											1								1	0	0	0	0		0	0	0	0	0	0
Chenopodiaceae	Chenopodiaceae															1	1			0	0	0	1	1		0	0	0	0	0	0
Cleistanthus-type	Bridelia					1			1	1	1	1								1	1	0	0	0		0	0	0	0	0	0
Clematis	Clematis*											1	1							1	0	1	0	0		0	0	0	0	0	0
Cliffortia nitidula	Cliffortia														1					0	0	0	1	0		0	0	0	0	0	0
Clutia	Clutia															1				0	0	0	1	0		0	0	0	0	0	0
Combretaceae	Combretaceae/Melastomataceae					1			1	1	1	1	1	1						1	1	1	1	0		0	0	0	0	0	0
Crassocephalum-type montuosum	Compositae												1	1		1	1			0	0	1	1	1		0	0	0	0	0	0
Croton-type	Croton					1					1	1	1		1					1	1	1	1	0		0	0	0	0	0	0
Cucurbitaceae	Cucurbitaceae												1	1		1				0	0	1	1	0		0	0	0	0	0	0
Cyperaceae	Cyperaceae																			0	0	0	0	0		0	0	0	0	0	0
Dipsacaceae	Dipsacaceae																			0	0	0	0	0		0	0	0	0	0	0
Dodonaea viscosa	Dodonaea viscosa					1					1	1			1					1	1	0	1	0		0	0	0	0	0	0
Dombeya-type	Dombeya					1						1	1		1					1	1	1	1	0		0	0	0	0	0	0
Dracaena steudneri-type	Dracaena steudneri*										1	1								1	0	0	0	0		0	0	0	0	0	0
Ekebergia-type	Ekebergia*					1			1	1	1	1								1	1	0	0	0		0	0	0	0	0	0
Entada-type	Entada*					1			1	1	1	1								1	1	0	0	0		0	0	0	0	0	0
Ericaceae	Ericaceae														1					0	0	0	1	0		0	0	0	0	0	0
Eriocaulaceae	Eriocaulaceae										1									1	0	0	0	0		0	0	0	0	0	0
Euclea	Euclea					1						1	1	1	1					1	1	1	1	0		0	0	0	0	0	0
Euphorbia-type	Euphorbia					1						1	1	1		1				1	1	1	1	0		0	0	0	0	0	0
Ficus	Ficus								1	1	1	1								1	0	0	0	0		0	0	0	0	0	0
Galiniera coffeoides	Rubiaceae											1								1	0	0	0	0		0	0	0	0	0	0
Geranium	Geraniaceae															1	1			0	0	0	1	1		0	0	0	0	0	0
Gramineae	Gramineae												1	1	1	1				0	0	1	1	0		0	0	0	0	0	0
Hagenia abyssinica	Hagenia abyssinica					1														0	1	0	0	0		0	0	0	0	0	0
Hallea-type rubrostipulata	Hallea* rubrosipulata												1							0	0	1	0	0		0	0	0	0	0	0
Harungana																				0	0	0	0	0		0	0	0	0	0	0
Hydrocotyle																				0	0	0	0	0		0	0	0	0	0	0
Hymenocardia	Hymenocardia										1	1								1	0	0	0	0		0	0	0	0	0	0
Hypericum	Hypericum											1								1	0	0	0	0		0	0	0	0	0	0
Ilex mitis	Ilex mitis					1														0	1	0	0	0		0	0	0	0	0	0
Impatiens	Impatiens					1														0	1	0	0	0		0	0	0	0	0	0
Indetermines																				0	0	0	0	0		0	0	0	0	0	0
Isoglossa	Isoglossa										1		1							1	0	1	0	0		0	0	0	0	0	0
Justicia striata-type	Justicia striata*											1								1	0	0	0	0		0	0	0	0	0	0
Kotschya-type																				0	0	0	0	0		0	0	0	0	0	0
Labiatae	Labiatae											1	1							1	0	1	0	0		0	0	0	0	0	0
Lactuceae	Compositae												1	1		1	1			0	0	1	1	1		0	0	0	0	0	0
Laurembergia tetrandra	Laurembergia tetrandra								1		1									1	0	0	0	0		0	0	0	0	0	0
Lobelia	Lobelia															1				0	0	0	1	0		0	0	0	0	0	0
Loranthaceae	Lorantaceae								1	1										1	0	0	0	0		0	0	0	0	0	0
Macaranga	Macaranga					1			1	1										1	1	0	0	0		0	0	0	0	0	0
Maesa lanceolata	Maesa lanceolata										1	1								1	0	0	0	0		0	0	0	0	0	0
Margaritaria-type discoidea	Margaritaria* discoidea								1	1										1	0	0	0	0		0	0	0	0	0	0
Melastomataceae																				0	0	0	0	0		0	0	0	0	0	0
Mimulopsis-type	Mimusops											1	1							1	0	1	0	0		0	0	0	0	0	0
Monocotyledoneae																				0	0	0	0	0		0	0	0	0	0	0
Monoletes																				0	0	0	0	0		0	0	0	0	0	0
Moraceae	Moraceae					1			1	1	1	1								1	1	0	0	0		0	0	0	0	0	0
Myrica	Myrica					1									1					0	1	0	1	0		0	0	0	0	0	0
Nuxia/Ficalhoa	Nuxia											1			1	1				1	0	0	1	0		0	0	0	0	0	0
Oldenlandia-type	Rubiaceae											1								1	0	0	0	0		0	0	0	0	0	0
Olea capensis	Olea capensis					1					1									1	1	0	0	0		0	0	0	0	0	0
Olea europaea ssp africana	Olea europaea					1	1					1								1	1	0	0	0		0	0	0	0	0	0
Osmunda																				0	0	0	0	0		0	0	0	0	0	0
Papilionoideae	Papilionoideae					1			1	1	1	1								1	1	0	0	0		0	0	0	0	0	0
Parinari-type	Parinari*										1	1								1	0	0	0	0		0	0	0	0	0	0
Phoenix reclinata	Phoenix reclinata									1	1									1	0	0	0	0		0	0	0	0	0	0
Phyllanthus-type niruri	Phyllanthus					1			1	1	1	1								1	1	0	0	0		0	0	0	0	0	0
Phyllanthus-type rivae	Phyllanthus					1			1	1	1	1								1	1	0	0	0		0	0	0	0	0	0
Pilea-type bambuseti	Urticaceae					1			1	1	1	1								1	1	0	0	0		0	0	0	0	0	0
Podocarpus	Podocarpus					1														0	1	0	0	0		0	0	0	0	0	0
Polyscias fulva-type	Polyscias fulva*					1														0	1	0	0	0		0	0	0	0	0	0
Potamogeton thunbergii-type																				0	0	0	0	0		0	0	0	0	0	0
Protea-type	Protea													1						0	0	0	1	0		0	0	0	0	0	0
Prunus africana	Prunus africana					1				1	1									1	1	0	0	0		0	0	0	0	0	0
Ranunculus	Ranunculus															1				0	0	0	1	0		0	0	0	0	0	0
Rapanea melanophloeos	Rapanea melanophloeos					1														0	1	0	0	0		0	0	0	0	0	0
Restionaceae	Restionaceae													1						0	0	0	1	0		0	0	0	0	0	0
Rubiaceae	Rubiaceae											1								1	0	0	0	0		0	0	0	0	0	0
Rubia-type	Rubia*										1	1	1							1	0	1	0	0		0	0	0	0	0	0
Rubus pinnatus-type																				0	0	0	0	0		0	0	0	0	0	0
Rumex	Rumex					1						1	1		1					1	1	1	1	0		0	0	0	0	0	0
Sapotaceae	Sapotaceae					1			1	1	1	1	1							1	1	1	0	0		0	0	0	0	0	0
Schefflera abyssinica-type																				0	0	0	0	0		0	0	0	0	0	0
Schefflera myriantha-type	Schefflera myriantha*					1									1	1				0	1	0	1	0		0	0	0	0	0	0
Senecio-type mannii	Compositae												1	1		1	1			0	0	1	1	1		0	0	0	0	0	0
Sericostachys-type scandens	Seriostachys scandens					1														0	1	0	0	0		0	0	0	0	0	0
Silene-type burchellii	Caryophyllaceae											1								1	0	0	0	0		0	0	0	0	0	0
Solanum	Solanum											1	1	1						1	0	1	1	0		0	0	0	0	0	0
Sphagnum																				0	0	0	0	0		0	0	0	0	0	0
Stephania-type abyssinica	Stephania* abyssinica											1								1	0	0	0	0		0	0	0	0	0	0
Stoebe kilimandscharica-type	Stoebe														1					0	0	0	1	0		0	0	0	0	0	0
Swertia usambarensis-type																				0	0	0	0	0		0	0	0	0	0	0
Swertia-type kilimandscharica																				0	0	0	0	0		0	0	0	0	0	0
Syzygium	Syzygium*					1			1	1	1									1	1	0	0	0		0	0	0	0	0	0
Teclea-type	Teclea*										1	1	1		1					1	0	1	1	0		0	0	0	0	0	0
Tetrorchidium	Tetrorchidium					1					1	1								1	1	0	0	0		0	0	0	0	0	0
Thalictrum																				0	0	0	0	0		0	0	0	0	0	0
Thymeleaceae	Thymeleaceae					1							1	1	1					0	1	1	1	0		0	0	0	0	0	0
Tiliaceae	Tiliaceae											1	1	1		1				1	0	1	1	0		0	0	0	0	0	0
Toddalia-type asiatica																				0	0	0	0	0		0	0	0	0	0	0
Trema-type orientalis	Trema*					1					1	1	1							1	1	1	0	0		0	0	0	0	0	0
Triletes																				0	0	0	0	0		0	0	0	0	0	0
Tubuliflorae	Compositae Tubuliforae													1		1	1			0	0	0	1	1		0	0	0	0	0	0
Typha																				0	0	0	0	0		0	0	0	0	0	0
Uapaca	Uapaca					1			1	1	1	1	1							1	1	1	0	0		0	0	0	0	0	0
Umbelliferae	Umbellifera												1	1	1	1				0	0	1	1	0		0	0	0	0	0	0
Urticaceae	Urticaceae					1			1	1	1	1								1	1	0	0	0		0	0	0	0	0	0
Vernonieae	Compositae Vernonieae												1			1				0	0	1	1	0		0	0	0	0	0	0
Xyris																				0	0	0	0	0		0	0	0	0	0	0
Zanthoxylum-type usambarense	Zanthoxylum					1					1	1	1							1	1	1	0	0		0	0	0	0	0	0
																											0	0	0	0	0

## Sheet: Uluguru DevaDeva
	Taxa	pft																		MEGABIOMES							MEGABIOMES
		bs	ts	ts1	ts2	wte	wte2	ec	Te1	Te2	Tr1	Tr2	Tr3	Tss	tss	sf	df			tropical forest	warm-temperate forest	savanna and dry woodland	grassland and dry shrubland	desert		SQRT	tropical forest	warm-temperate forest	savanna and dry woodland	grassland and dry shrubland	desert
Acacia Type II	Acacia											1	1	1	1	1				1	0	1	1	0		0	0	0	0	0	0
Acacia Type III	Acacia											1	1	1	1	1				1	0	1	1	0		0	0	0	0	0	0
Acalypha	Acalypha										1	1	1							1	0	1	0	0		0	0	0	0	0	0
Acanthaceae undiff.	Acanthaceae											1	1	1	1	1				1	0	1	1	0		0	0	0	0	0	0
Acanthus arboreus-type	Acanthaceae											1	1	1	1	1				1	0	1	1	0		0	0	0	0	0	0
Aerva javanica-type	Aerva javanica*															1	1			0	0	0	1	1		0	0	0	0	0	0
Alchornea-type	Alchornea					1			1	1										1	1	0	0	0		0	0	0	0	0	0
Allophyllus-type	Allophylus					1					1	1	1							1	1	1	0	0		0	0	0	0	0	0
Aniseia sim.	Convolvulaceae										1	1	1							1	0	1	0	0		0	0	0	0	0	0
Anthocleista-type	Anthocleista					1					1									1	1	0	0	0		0	0	0	0	0	0
Apodytes dimidiata	Apodytes dimidiata					1														0	1	0	0	0		0	0	0	0	0	0
Artemisia	Artemisia															1	1			0	0	0	1	1		0	0	0	0	0	0
Asystasia	Acanthaceae											1	1	1	1	1				1	0	1	1	0		0	0	0	0	0	0
Berlinia	Leguminosae								1	1	1									1	0	0	0	0		0	0	0	0	0	0
Brachystegia	Brachystegia											1	1							1	0	1	0	0		0	0	0	0	0	0
Campanulaceae undiff.	Campanulaceae											1	1	1	1					1	0	1	1	0		0	0	0	0	0	0
Carduus	Compositae												1	1		1	1			0	0	1	1	1		0	0	0	0	0	0
Cassine	Celastraceae/Hippocrateaceae					1			1	1	1	1								1	1	0	0	0		0	0	0	0	0	0
Celosia schweinfurthiana-type	Amaranthaceae											1	1	1		1	1			1	0	1	1	1		0	0	0	0	0	0
Celtis	Celtis					1					1	1								1	1	0	0	0		0	0	0	0	0	0
Cliffortia nitidula	Cliffortia														1					0	0	0	1	0		0	0	0	0	0	0
Combretum	Combretaceae/Melastomataceae					1			1	1	1	1	1	1						1	1	1	1	0		0	0	0	0	0	0
Cordia africana	Boraginaceae																			0	0	0	0	0		0	0	0	0	0	0
Cornus volkensii	Cornaceae																			0	0	0	0	0		0	0	0	0	0	0
Crassocephalum	Compositae												1	1		1	1			0	0	1	1	1		0	0	0	0	0	0
Croton-type	Croton					1					1	1	1		1					1	1	1	1	0		0	0	0	0	0	0
Cussonia-type	Cussonia					1						1	1	1						1	1	1	1	0		0	0	0	0	0	0
Cyperaceae undiff.																				0	0	0	0	0		0	0	0	0	0	0
Dialium-type	Leguminosae								1	1	1									1	0	0	0	0		0	0	0	0	0	0
Diospyros	Diospyros					1						1	1							1	1	1	0	0		0	0	0	0	0	0
Dolichos serpens	Leguminosae								1	1	1									1	0	0	0	0		0	0	0	0	0	0
Encephalartos-type	Zamiaceae																			0	0	0	0	0		0	0	0	0	0	0
Englerina woodfordioides	Lorantaceae								1	1										1	0	0	0	0		0	0	0	0	0	0
Ericaceae undiff.	Ericaceae														1					0	0	0	1	0		0	0	0	0	0	0
Eriocaulon schimperi	Eriocaulaceae										1									1	0	0	0	0		0	0	0	0	0	0
Euphorbia	Euphorbia					1						1	1	1		1				1	1	1	1	0		0	0	0	0	0	0
Ficus-type	Ficus								1	1	1	1								1	0	0	0	0		0	0	0	0	0	0
Geraniaceae undiff.	Geraniaceae															1	1			0	0	0	1	1		0	0	0	0	0	0
Hagenia abyssinica	Hagenia abyssinica					1														0	1	0	0	0		0	0	0	0	0	0
Heliotropum																				0	0	0	0	0		0	0	0	0	0	0
Hymenocardia acida	Hymenocardia										1	1								1	0	0	0	0		0	0	0	0	0	0
Ilex mitis	Ilex mitis					1														0	1	0	0	0		0	0	0	0	0	0
Laurembergia	Haloragaceae																			0	0	0	0	0		0	0	0	0	0	0
Leucas-type	Lamiaceae																			0	0	0	0	0		0	0	0	0	0	0
Loranthaceae undiff.	Lorantaceae								1	1										1	0	0	0	0		0	0	0	0	0	0
Lycopodium foveolate																				0	0	0	0	0		0	0	0	0	0	0
Lycopodium jussiaei																				0	0	0	0	0		0	0	0	0	0	0
Macaranga	Macaranga					1			1	1										1	1	0	0	0		0	0	0	0	0	0
Malvaceae undiff.	Malvaceae											1								1	0	0	0	0		0	0	0	0	0	0
Monoletes undiff.																				0	0	0	0	0		0	0	0	0	0	0
Morella salicifolia	Myricacaea																			0	0	0	0	0		0	0	0	0	0	0
Neoboutonia-type	Euphorbiaceae																			0	0	0	0	0		0	0	0	0	0	0
Nuxia/Ficalhoa-type	Nuxia											1			1	1				1	0	0	1	0		0	0	0	0	0	0
Nymphaea-type																				0	0	0	0	0		0	0	0	0	0	0
Ocotea usambarense																				0	0	0	0	0		0	0	0	0	0	0
Olea	Olea					1	1					1			1					1	1	0	1	0		0	0	0	0	0	0
Oligocodon	Rubiaceae											1								1	0	0	0	0		0	0	0	0	0	0
Ozoroa reticulata-type	Anacardiaceae																			0	0	0	0	0		0	0	0	0	0	0
Poaceae	Gramineae												1	1	1	1				0	0	1	1	0		0	0	0	0	0	0
Podocarpus	Podocarpus					1														0	1	0	0	0		0	0	0	0	0	0
Polygala																				0	0	0	0	0		0	0	0	0	0	0
Polygonaceae																				0	0	0	0	0		0	0	0	0	0	0
Polyscias fulva	Polyscias fulva*					1														0	1	0	0	0		0	0	0	0	0	0
Protea-type	Protea													1						0	0	0	1	0		0	0	0	0	0	0
Psychotria	Rubiaceae											1								1	0	0	0	0		0	0	0	0	0	0
Psydrax schimperiana-type	Rubiaceae											1								1	0	0	0	0		0	0	0	0	0	0
Rhamnaceae undiff.	Rhamnaceae					1			1	1	1	1	1	1		1	1			1	1	1	1	1		0	0	0	0	0	0
Rhus natalensis-type	Anacardiaceae																			0	0	0	0	0		0	0	0	0	0	0
Rhus tripartita-type	Anacardiaceae																			0	0	0	0	0		0	0	0	0	0	0
Rosa	Rosaceae																			0	0	0	0	0		0	0	0	0	0	0
Satureja-type	Lamiaceae																			0	0	0	0	0		0	0	0	0	0	0
Sclerochiton obtusisepalum	Acanthaceae											1	1	1	1	1				1	0	1	1	0		0	0	0	0	0	0
Shirakia	Euphorbiaceae																			0	0	0	0	0		0	0	0	0	0	0
Silene/Uebelina-type	Caryophyllaceae											1								1	0	0	0	0		0	0	0	0	0	0
Stellaria mannii-type	Caryophyllaceae											1								1	0	0	0	0		0	0	0	0	0	0
Syzygium	Syzygium*					1			1	1	1									1	1	0	0	0		0	0	0	0	0	0
Tiliaceae	Tiliaceae											1	1	1		1				1	0	1	1	0		0	0	0	0	0	0
Triletes undiff.																				0	0	0	0	0		0	0	0	0	0	0
Tubuliflorae undiff.	Compositae Tubuliforae													1		1	1			0	0	0	1	1		0	0	0	0	0	0
Undetermined																				0	0	0	0	0		0	0	0	0	0	0
Vernonieae undiff.	Compositae Vernonieae												1			1				0	0	1	1	0		0	0	0	0	0	0
																											0	0	0	0	0

## Sheet: Tritrivakely
		pft																		MEGABIOMES							MEGABIOMES
Sample	Taxa	bs	ts	ts1	ts2	wte	wte2	ec	Te1	Te2	Tr1	Tr2	Tr3	Tss	tss	sf	df			tropical forest	warm-temperate forest	savanna and dry woodland	grassland and dry shrubland	desert		SQRT	tropical forest	warm-temperate forest	savanna and dry woodland	grassland and dry shrubland	desert
Acalypha-type	Acalypha										1	1	1							1	0	1	0	0		1	1	0	1	0	0
Acanthaceae	Acanthaceae											1	1	1	1	1				1	0	1	1	0		0	0	0	0	0	0
Ajuga																				0	0	0	0	0		0	0	0	0	0	0
Alismataceae																				0	0	0	0	0		0	0	0	0	0	0
Allophyllus	Allophylus					1					1	1	1							1	1	1	0	0		0	0	0	0	0	0
Amaranthaceae	Amaranthaceae											1	1	1		1	1			1	0	1	1	1		0	0	0	0	0	0
Anisotes	Acanthaceae											1	1	1	1	1				1	0	1	1	0		0	0	0	0	0	0
Anthospermum	Anthospermum											1	1		1					1	0	1	1	0		0	0	0	0	0	0
Antidesma-type	Antidesma*											1								1	0	0	0	0		0	0	0	0	0	0
Aponogeton																				0	0	0	0	0		0	0	0	0	0	0
Ascarinopsis																				0	0	0	0	0		0	0	0	0	0	0
Bosqueia	Boscia*															1				0	0	0	1	0		0	0	0	0	0	0
Brachylaena	Brachylaena					1														0	1	0	0	0		0	0	0	0	0	0
Cannabis-type																				0	0	0	0	0		0	0	0	0	0	0
Capparidaceae	Capparidaceae															1				0	0	0	1	0		0	0	0	0	0	0
Caryophyllaceae	Caryophyllaceae											1								1	0	0	0	0		0	0	0	0	0	0
Cassia-type	Cassia*												1	1		1				0	0	1	1	0		0	0	0	0	0	0
Celtis	Celtis					1					1	1								1	1	0	0	0		0	0	0	0	0	0
Chenopodiaceae	Chenopodiaceae															1	1			0	0	0	1	1		0	0	0	0	0	0
Combretaceae	Combretaceae/Melastomataceae					1			1	1	1	1	1	1						1	1	1	1	0		0	0	0	0	0	0
Commelinaceae	Commelinaceae					1						1	1	1	1	1				1	1	1	1	0		0	0	0	0	0	0
Comp.lig.	Compositae Liguliflorae															1	1			0	0	0	1	1		0	0	0	0	0	0
Comp.tub.	Compositae Tubuliforae													1		1	1			0	0	0	1	1		0	0	0	0	0	0
Cruciferae	Cruciferae																1			0	0	0	0	1		0	0	0	0	0	0
Cyperaceae																				0	0	0	0	0		0	0	0	0	0	0
Dodonaea																				0	0	0	0	0		0	0	0	0	0	0
Dombeya	Dombeya					1						1	1		1					1	1	1	1	0		0	0	0	0	0	0
Drypetes	Drypetes					1			1	1	1	1								1	1	0	0	0		0	0	0	0	0	0
Elaeocarpaceae																				0	0	0	0	0		0	0	0	0	0	0
Equisetum																				0	0	0	0	0		0	0	0	0	0	0
Ericaceae	Ericaceae														1					0	0	0	1	0		0	0	0	0	0	0
Eriocaulon	Eriocaulaceae										1									1	0	0	0	0		0	0	0	0	0	0
Euclea	Euclea					1						1	1	1	1					1	1	1	1	0		0	0	0	0	0	0
Eugenia-type	Myrtaceae								1	1	1	1								1	0	0	0	0		0	0	0	0	0	0
Euphorbiaceae																				0	0	0	0	0		0	0	0	0	0	0
Euphorbia-type	Euphorbia					1						1	1	1		1				1	1	1	1	0		0	0	0	0	0	0
Gramineae	Gramineae												1	1	1	1				0	0	1	1	0		0	0	0	0	0	0
Gymnosporia																				0	0	0	0	0		0	0	0	0	0	0
Hydrocotyle																				0	0	0	0	0		0	0	0	0	0	0
Hydrolea																				0	0	0	0	0		0	0	0	0	0	0
Ilex																				0	0	0	0	0		0	0	0	0	0	0
Ind‚termin‚s+Abim‚s																				0	0	0	0	0		0	0	0	0	0	0
Isoglossa	Isoglossa										1		1							1	0	1	0	0		0	0	0	0	0	0
Juncus																				0	0	0	0	0		0	0	0	0	0	0
Lemna	Lemna												1							0	0	1	0	0		0	0	0	0	0	0
Lythraceae																				0	0	0	0	0		0	0	0	0	0	0
Macaranga-type	Macaranga					1			1	1										1	1	0	0	0		0	0	0	0	0	0
Malvaceae	Malvaceae											1								1	0	0	0	0		0	0	0	0	0	0
Meliaceae	Meliaceae								1	1										1	0	0	0	0		0	0	0	0	0	0
Monimia-type																				0	0	0	0	0		0	0	0	0	0	0
Monocotyledones																				0	0	0	0	0		0	0	0	0	0	0
Mousses																				0	0	0	0	0		0	0	0	0	0	0
Myrica	Myrica					1									1					0	1	0	1	0		0	0	0	0	0	0
Myriophyllum																				0	0	0	0	0		0	0	0	0	0	0
Nymphaea																				0	0	0	0	0		0	0	0	0	0	0
Nymphoides indica-type																				0	0	0	0	0		0	0	0	0	0	0
Oleaceae	Oleaceae					1						1			1					1	1	0	1	0		0	0	0	0	0	0
Olea-type	Olea					1	1					1			1					1	1	0	1	0		0	0	0	0	0	0
Palmeae																				0	0	0	0	0		0	0	0	0	0	0
Papilionaceae	Papilionoideae					1			1	1	1	1								1	1	0	0	0		0	0	0	0	0	0
Paullinia																				0	0	0	0	0		0	0	0	0	0	0
Persicaria																				0	0	0	0	0		0	0	0	0	0	0
Phyllantus	Phyllanthus					1			1	1	1	1								1	1	0	0	0		0	0	0	0	0	0
Pinus	Pinus							1												0	1	0	1	0		0	0	0	0	0	0
Podocarpus	Podocarpus					1														0	1	0	0	0		0	0	0	0	0	0
Polygonum																				0	0	0	0	0		0	0	0	0	0	0
Potamogeton																				0	0	0	0	0		0	0	0	0	0	0
Pygeum-type																				0	0	0	0	0		0	0	0	0	0	0
Ravanea-type																				0	0	0	0	0		0	0	0	0	0	0
Restio	Restio													1						0	0	0	1	0		0	0	0	0	0	0
Rosaceae																				0	0	0	0	0		0	0	0	0	0	0
Rubiaceae	Rubiaceae											1								1	0	0	0	0		0	0	0	0	0	0
Rubus-type																				0	0	0	0	0		0	0	0	0	0	0
Sapindaceae	Sapindaceae										1	1								1	0	0	0	0		0	0	0	0	0	0
Sapotaceae	Sapotaceae					1			1	1	1	1	1							1	1	1	0	0		0	0	0	0	0	0
Schefflera																				0	0	0	0	0		0	0	0	0	0	0
Scrophulariaceae	Scrophulariaceae					1							1	1	1	1				0	1	1	1	0		0	0	0	0	0	0
Solanum	Solanum											1	1	1						1	0	1	1	0		0	0	0	0	0	0
Sp.mono																				0	0	0	0	0		0	0	0	0	0	0
Sp.tri.lisse																				0	0	0	0	0		0	0	0	0	0	0
Sp.tri.non lisse																				0	0	0	0	0		0	0	0	0	0	0
SpAnemia																				0	0	0	0	0		0	0	0	0	0	0
SpAnthoceros																				0	0	0	0	0		0	0	0	0	0	0
SpCeratopteris																				0	0	0	0	0		0	0	0	0	0	0
SpEquisetum																				0	0	0	0	0		0	0	0	0	0	0
SpIsoetes																				0	0	0	0	0		0	0	0	0	0	0
SpLycopodium																				0	0	0	0	0		0	0	0	0	0	0
SpMohria																				0	0	0	0	0		0	0	0	0	0	0
SpOsmunda																				0	0	0	0	0		0	0	0	0	0	0
Sterculiaceae																				0	0	0	0	0		0	0	0	0	0	0
Stoebe	Stoebe														1					0	0	0	1	0		0	0	0	0	0	0
Telephium																				0	0	0	0	0		0	0	0	0	0	0
Thalictrum																				0	0	0	0	0		0	0	0	0	0	0
Trema	Trema*					1					1	1	1							1	1	1	0	0		0	0	0	0	0	0
Uapaca	Uapaca					1			1	1	1	1	1							1	1	1	0	0		0	0	0	0	0	0
Umbelliferae	Umbellifera												1	1	1	1				0	0	1	1	0		0	0	0	0	0	0
Undiff.																				0	0	0	0	0		0	0	0	0	0	0
Urticaceae-Moraceae	Urticacea/Moraceae					1			1	1	1	1								1	1	0	0	0		0	0	0	0	0	0
Utricularia																				0	0	0	0	0		0	0	0	0	0	0
Varia																				0	0	0	0	0		0	0	0	0	0	0
Vitex																				0	0	0	0	0		0	0	0	0	0	0
Ziziphus																				0	0	0	0	0		0	0	0	0	0	0
																											1	0	1	0	0

## Sheet: Saltpan
		pft																		MEGABIOMES							MEGABIOMES
	Taxa	bs	ts	ts1	ts2	wte	wte2	ec	Te1	Te2	Tr1	Tr2	Tr3	Tss	tss	sf	df			tropical forest	warm-temperate forest	savanna and dry woodland	grassland and dry shrubland	desert		SQRT	tropical forest	warm-temperate forest	savanna and dry woodland	grassland and dry shrubland	desert
Acacia	Acacia											1	1	1	1	1				1	0	1	1	0		0	0	0	0	0	0
Acalypha	Acalypha										1	1	1							1	0	1	0	0		0	0	0	0	0	0
Acanthaceae	Acanthaceae											1	1	1	1	1				1	0	1	1	0		0	0	0	0	0	0
Aizoaceae-type																				0	0	0	0	0		0	0	0	0	0	0
Alchornea	Alchornea					1			1	1										1	1	0	0	0		0	0	0	0	0	0
Allophylus	Allophylus					1					1	1	1							1	1	1	0	0		0	0	0	0	0	0
Aloe-type	Aloe												1	1	1	1	1			0	0	1	1	1		0	0	0	0	0	0
Anthoceros																				0	0	0	0	0		0	0	0	0	0	0
Anthospermum	Anthospermum											1	1		1					1	0	1	1	0		0	0	0	0	0	0
Artemisia	Artemisia															1	1			0	0	0	1	1		0	0	0	0	0	0
Asparagus-type	Asparagus												1	1	1					0	0	1	1	0		0	0	0	0	0	0
Bequaertiodendron	Bequaertiodendron										1	1				1	1			1	0	0	1	1		0	0	0	0	0	0
Brachystegia	Brachystegia											1	1							1	0	1	0	0		0	0	0	0	0	0
Burkea	Burkea											1	1	1	1					1	0	1	1	0		0	0	0	0	0	0
Campanulaceae	Campanulaceae											1	1	1	1					1	0	1	1	0		0	0	0	0	0	0
Capparaceae	Capparidaceae															1				0	0	0	1	0		0	0	0	0	0	0
Caryophyllaceae	Caryophyllaceae											1								1	0	0	0	0		0	0	0	0	0	0
Celastraceae	Celastraceae/Hippocrateaceae					1			1	1	1	1								1	1	0	0	0		0	0	0	0	0	0
Celtis	Celtis					1					1	1								1	1	0	0	0		0	0	0	0	0	0
Cephalaria																				0	0	0	0	0		0	0	0	0	0	0
Chenopodiaceae/Amaranthaceae	Amaranthaceae/Chenopodiaceae													1		1	1			0	0	0	1	1		0	0	0	0	0	0
Cliffortia	Cliffortia														1					0	0	0	1	0		0	0	0	0	0	0
Combretaceae	Combretaceae/Melastomataceae					1			1	1	1	1	1	1						1	1	1	1	0		0	0	0	0	0	0
Commelinaceae	Commelinaceae					1						1	1	1	1	1				1	1	1	1	0		0	0	0	0	0	0
Commiphora	Commiphora												1	1	1	1				0	0	1	1	0		0	0	0	0	0	0
Compositae	Compositae												1	1		1	1			0	0	1	1	1		0	0	0	0	0	0
Convolvulaceae	Convolvulaceae										1	1	1							1	0	1	0	0		0	0	0	0	0	0
Crassulaceae	Crassulaceae													1	1	1	1			0	0	0	1	1		0	0	0	0	0	0
Croton	Croton					1					1	1	1		1					1	1	1	1	0		0	0	0	0	0	0
Cyperaceae																				0	0	0	0	0		0	0	0	0	0	0
Dichrostachys																				0	0	0	0	0		0	0	0	0	0	0
Diospyros	Diospyros					1						1	1							1	1	1	0	0		0	0	0	0	0	0
Dodonaea																				0	0	0	0	0		0	0	0	0	0	0
Dombeya	Dombeya					1						1	1		1					1	1	1	1	0		0	0	0	0	0	0
Encephalartos																				0	0	0	0	0		0	0	0	0	0	0
Ericaceae	Ericaceae														1					0	0	0	1	0		0	0	0	0	0	0
Euclea	Euclea					1						1	1	1	1					1	1	1	1	0		0	0	0	0	0	0
Euphorbia	Euphorbia					1						1	1	1		1				1	1	1	1	0		0	0	0	0	0	0
Gentianaceae																				0	0	0	0	0		0	0	0	0	0	0
Gramineae	Gramineae												1	1	1	1				0	0	1	1	0		0	0	0	0	0	0
Grewia	Grewia											1	1	1	1					1	0	1	1	0		0	0	0	0	0	0
Gunnera	Gunnera														1	1				0	0	0	1	0		0	0	0	0	0	0
Heteromorpha																				0	0	0	0	0		0	0	0	0	0	0
Indetermines																				0	0	0	0	0		0	0	0	0	0	0
Isoglossa	Isoglossa										1		1							1	0	1	0	0		0	0	0	0	0	0
Kiggelaria africana	Kiggelaria					1									1					0	1	0	1	0		0	0	0	0	0	0
Kirkia																				0	0	0	0	0		0	0	0	0	0	0
Labiatae	Labiatae											1	1							1	0	1	0	0		0	0	0	0	0	0
Lactucoideae																				0	0	0	0	0		0	0	0	0	0	0
Liliaceae	Liliaceae												1	1	1	1	1			0	0	1	1	1		0	0	0	0	0	0
Linaceae																				0	0	0	0	0		0	0	0	0	0	0
Lycopodium																				0	0	0	0	0		0	0	0	0	0	0
Malvaceae	Malvaceae											1								1	0	0	0	0		0	0	0	0	0	0
Mimosoideae	Mimisoideae								1	1	1	1	1							1	0	1	0	0		0	0	0	0	0	0
Mohria	Mohria															1				0	0	0	1	0		0	0	0	0	0	0
Monoletes																				0	0	0	0	0		0	0	0	0	0	0
Myrica	Myrica					1									1					0	1	0	1	0		0	0	0	0	0	0
Myrothamnus																				0	0	0	0	0		0	0	0	0	0	0
Myrsine	Myrsinaceae					1						1	1							1	1	1	0	0		0	0	0	0	0	0
Nyctaginaceae	Nyctaginaceae					1						1	1	1		1				1	1	1	1	0		0	0	0	0	0	0
Nymphaea																				0	0	0	0	0		0	0	0	0	0	0
Oleaceae	Oleaceae					1						1			1					1	1	0	1	0		0	0	0	0	0	0
Ophioglossum																				0	0	0	0	0		0	0	0	0	0	0
Oxygonum																				0	0	0	0	0		0	0	0	0	0	0
Palmae																				0	0	0	0	0		0	0	0	0	0	0
Passerina	Passerina					1										1				0	1	0	1	0		0	0	0	0	0	0
Pellaea-type	Pellaea													1	1					0	0	0	1	0		0	0	0	0	0	0
Peltophorum	Peltophorum											1	1							1	0	1	0	0		0	0	0	0	0	0
Podocarpus	Podocarpus					1														0	1	0	0	0		0	0	0	0	0	0
Polygalaceae																				0	0	0	0	0		0	0	0	0	0	0
Polygonum																				0	0	0	0	0		0	0	0	0	0	0
Polypodiaceae																				0	0	0	0	0		0	0	0	0	0	0
Potamogetonaceae																				0	0	0	0	0		0	0	0	0	0	0
Proteaceae																				0	0	0	0	0		0	0	0	0	0	0
Pteris																				0	0	0	0	0		0	0	0	0	0	0
Ranunculaceae																				0	0	0	0	0		0	0	0	0	0	0
Restionaceae	Restionaceae													1						0	0	0	1	0		0	0	0	0	0	0
Rhamnaceae	Rhamnaceae					1			1	1	1	1	1	1		1	1			1	1	1	1	1		0	0	0	0	0	0
Rhus																				0	0	0	0	0		0	0	0	0	0	0
Riccia																				0	0	0	0	0		0	0	0	0	0	0
Rosaceae																				0	0	0	0	0		0	0	0	0	0	0
Rumex	Rumex					1						1	1		1					1	1	1	1	0		0	0	0	0	0	0
Scabiosa	Scabiosa																			0	0	0	0	0		0	0	0	0	0	0
Sclerocarya	Sclerocarya												1	1	1					0	0	1	1	0		0	0	0	0	0	0
Scrophulariaceae	Scrophulariaceae					1							1	1	1	1				0	1	1	1	0		0	0	0	0	0	0
Spirostachys	Spirostachys												1		1					0	0	1	1	0		0	0	0	0	0	0
Stoebe-type	Stoebe														1					0	0	0	1	0		0	0	0	0	0	0
Tarchonanthus	Tarchonanthus											1	1	1	1					1	0	1	1	0		0	0	0	0	0	0
Tribulus	Tribulus															1	1			0	0	0	1	1		0	0	0	0	0	0
Triletes																				0	0	0	0	0		0	0	0	0	0	0
Tulbaghia-type																				0	0	0	0	0		0	0	0	0	0	0
Typha																				0	0	0	0	0		0	0	0	0	0	0
Umbelliferae	Umbellifera												1	1	1	1				0	0	1	1	0		0	0	0	0	0	0
Vangueria																				0	0	0	0	0		0	0	0	0	0	0
																											0	0	0	0	0

## Sheet: Mfabeni
		pft																		MEGABIOMES							MEGABIOMES
	Taxa	bs	ts	ts1	ts2	wte	wte2	ec	Te1	Te2	Tr1	Tr2	Tr3	Tss	tss	sf	df			tropical forest	warm-temperate forest	savanna and dry woodland	grassland and dry shrubland	desert			tropical forest	warm-temperate forest	savanna and dry woodland	grassland and dry shrubland	desert
ACANTHACEAE	Acanthaceae											1	1	1	1	1				1	0	1	1	0		0	0	0	0	0	0
ANACARDIACEAE																				0	0	0	0	0		0	0	0	0	0	0
APOCYNACEAE	Apocynaceae								1	1	1	1								1	0	0	0	0		0	0	0	0	0	0
ASTERACEAE	Compositae												1	1		1	1			0	0	1	1	1		0	0	0	0	0	0
CARYOPHYLLACEAE	Caryophyllaceae											1								1	0	0	0	0		0	0	0	0	0	0
CELASTRACEAE	Celastraceae/Hippocrateaceae					1			1	1	1	1								1	1	0	0	0		0	0	0	0	0	0
CHENOPODIACEAE	Chenopodiaceae															1	1			0	0	0	1	1		0	0	0	0	0	0
COLCHICACEAE																				0	0	0	0	0		0	0	0	0	0	0
COMBRETACEAE	Combretaceae/Melastomataceae					1			1	1	1	1	1	1						1	1	1	1	0		0	0	0	0	0	0
CYANTHACEAE																				0	0	0	0	0		0	0	0	0	0	0
CYPERACEAE																				0	0	0	0	0		0	0	0	0	0	0
DIPSACACIAE																				0	0	0	0	0		0	0	0	0	0	0
ERICACEAE	Ericaceae														1					0	0	0	1	0		0	0	0	0	0	0
ERYTHROXYLACEAE																				0	0	0	0	0		0	0	0	0	0	0
EUPHORBIACEAE																				0	0	0	0	0		0	0	0	0	0	0
FABACEAE	Leguminosae								1	1	1									1	0	0	0	0		0	0	0	0	0	0
FABACEAE (Acacia)	Acacia											1	1	1	1	1				1	0	1	1	0		0	0	0	0	0	0
FAGACEAE-LIKE	Leguminosae								1	1	1									1	0	0	0	0		0	0	0	0	0	0
FLACOURTIACEAE	Flacourtiaceae										1	1								1	0	0	0	0		0	0	0	0	0	0
GERANIACEAE	Geraniaceae															1	1			0	0	0	1	1		0	0	0	0	0	0
IRIDACEAE																				0	0	0	0	0		0	0	0	0	0	0
LECYTHIDACEAE																				0	0	0	0	0		0	0	0	0	0	0
LILIACEAE	Liliaceae												1	1	1	1	1			0	0	1	1	1		0	0	0	0	0	0
LYCOPODIACEAE																				0	0	0	0	0		0	0	0	0	0	0
MALVACEAE	Malvaceae											1								1	0	0	0	0		0	0	0	0	0	0
MORACEAE	Moraceae					1			1	1	1	1								1	1	0	0	0		0	0	0	0	0	0
MYRICACEAE																				0	0	0	0	0		0	0	0	0	0	0
MYRTACEAE	Myrtaceae								1	1	1	1								1	0	0	0	0		0	0	0	0	0	0
POACEAE	Gramineae												1	1	1	1				0	0	1	1	0		0	0	0	0	0	0
PODOCARPACEAE	Podocarpus					1														0	1	0	0	0		0	0	0	0	0	0
POLYGALACEAE																				0	0	0	0	0		0	0	0	0	0	0
PROTEACEAE																				0	0	0	0	0		0	0	0	0	0	0
PTERIDOPHYTA (M)																				0	0	0	0	0		0	0	0	0	0	0
PTERIDOPHYTA (T)																				0	0	0	0	0		0	0	0	0	0	0
RHAMNACEAE	Rhamnaceae					1			1	1	1	1	1	1		1	1			1	1	1	1	1		0	0	0	0	0	0
RHIZOPHORACEAE																				0	0	0	0	0		0	0	0	0	0	0
ROSACEAE																				0	0	0	0	0		0	0	0	0	0	0
RUBIACEAE	Rubiaceae											1								1	0	0	0	0		0	0	0	0	0	0
SCROPHULARIACEAE	Scrophulariaceae					1							1	1	1	1				0	1	1	1	0		0	0	0	0	0	0
SMILACACEAE																				0	0	0	0	0		0	0	0	0	0	0
THYMELIACEAE	Thymeleaceae					1							1	1	1					0	1	1	1	0		0	0	0	0	0	0
Undertermined																				0	0	0	0	0		0	0	0	0	0	0
																											0	0	0	0	0
