# Supplementary material for: Terrestrial biosphere changes over the last 120 kyr
Source: Copernicus journal article supplement (doi:10.5194/cp-12-51-2016), 2016-01-18
Supplement: Supplementary file 1 [file cp-12-51-2016-supplement.zip › supplement/Australasia/Asia_Australiascores_Pickettetal2004.xls]

## Sheet: Caledonian Fen
Sample	Age (approx) ka, assumed BP	tropical forest	warm-temperate forest	temperate forest	savanna and dry woodland	grassland and dry shrubland	tundra
0	4.2676	16.5079	18.2968	14.0859	21.8083	15.3263	9.26947
4	4.5408	18.2801	20.6906	16.6379	24.5172	17.044	9.50217
8	4.814	16.1774	18.2848	14.5339	23.2954	17.0501	10.3238
10	4.9506
14	5.2238	13.5376	13.1704	10.4389	17.9443	14.1709	13.4539
18	5.497
22	5.7702	13.7538	14.182	10.9765	17.7331	13.2141	8.1126
26	6.0434
30	6.3166	14.8238	14.409	13.5593	20.5151	14.2019	9.60805
36	6.7264
44	7.2728	14.9786	15.0408	12.0226	18.5043	12.4618	6.23894
52	7.8192
60	8.3656	12.5593	10.0765	7.379	14.1435	10.0749	7.68556
68	8.912	11.565	11.1922	9.21882	13.7018	8.93404	8.96952
76	9.4584	13.8851	14.7238	12.3334	17.1001	11.0571	10.7919
84	10.0048
89	10.3463	12.7315	12.758	10.6637	16.3881	10.4758	9.65839
93	10.6195
97	10.8927	12.172	12.6415	10.7326	18.7885	15.3665	11.1313
101	11.1659
105	11.4391	12.9259	11.8142	8.95454	17.1552	14.0214	10.613
109	11.7123
113	11.9855	9.23288	6.88219	5.21091	12.962	12.7713	10.0864
117	12.2587	11.9434	8.87715	7.02404	17.4465	17.5512	13.8459
121	12.5319	13.8329	13.1517	10.6347	21.3013	22.7048	22.1915
125	12.8051	14.3112	9.41669	6.50063	21.3168	21.9	19.5672
129	13.0783	12.6696	7.02978	4.53949	19.862	18.8374	15.1019
135	13.4881	11.6736	10.9225	8.67939	23.1338	25.2909	19.6368
143	14.0345	11.7209	10.6321	8.3462	24.3189	24.5913	19.4969
151	14.5809	10.8682	7.87524	5.22876	22.526	22.5762	17.8609
159	15.1273	11.5919	10.2024	8.09307	23.548	25.4745	20.8209
167	15.6737	12.8188	12.4254	12.4254	25.3118	26.464	23.6343
173	16.0835	14.5393	13.4476	10.6562	26.2855	27.0843	22.9235
181	16.6299	14.5845	11.9556	9.0811	23.6683	25.8869	18.5227
187	17.0397	14.5116	13.0943	9.92707	25.4276	26.8363	20.4967
191	17.3129	14.0152	11.6867	9.8906	24.6806	27.6203	20.4417
195	17.5861	15.8584	13.8921	10.616	26.1265	28.9283	22.8648
199	17.8593	14.7085	13.5741	10.1428	25.3262	26.7241	17.9425
203	18.1325	12.0806	8.90029	7.00998	21.3172	24.0766	17.977
207	18.4057	12.1547	8.82771	7.2055	21.2845	23.1409	17.1976
211	18.6789
215	18.9521	13.772	11.0812	8.68048	23.1109	25.1181	18.5877
219	19.2253
223	19.4985	10.1169	7.63148	6.22891	21.5311	23.7388	18.9833
227	19.7717
231	20.0449	12.2431	10.1506	8.02438	23.4713	25.4134	21.7493
235	20.3181
239	20.5913	13.6384	10.6453	8.6734	23.8261	26.7669	18.3314
243	20.8645
250	21.3426	13.4528	13.3973	11.5791	23.7236	24.665	19.322
260	22.0256
264	22.2988	14.812	12.2316	9.25982	24.8534	26.0501	20.1148
268	22.572
272	22.8452	15.749	13.6241	10.4506	25.0665	26.336	18.7878
276	23.1184
280	23.3916	12.3289	10.5348	8.64872	24.005	25.9016	21.1985
284	23.6648
288	23.938	14.5298	10.7835	8.10436	23.2911	23.7995	19.0294
292	24.2112
296	24.4844	15.9545	13.6442	10.0941	25.6547	26.4208	19.9238
300	24.7576
304	25.0308	14.2991	12.1211	10.3035	23.2087	23.461	18.2125
308	25.304
312	25.5772	15.3033	12.383	9.15343	23.9585	25.5885	18.4625
316	25.8504
320	26.1236	15.2125	11.4839	9.00852	24.7747	25.8999	20.1562
324	26.3968
328	26.67	19.0942	14.3785	11.5724	26.3795	27.2097	19.8571
332	26.9432
336	27.2164	17.3767	13.5104	12.162	27.0464	27.6005	23.9067
340	27.4896
344	27.7628	16.4515	14.0236	10.6953	26.9191	27.7465	19.0766
346	27.8994
350	28.1726	18.4466	15.3469	14.1864	28.867	29.0883	23.1147
353	28.3775
357	28.6507	15.72	14.4348	10.9915	27.2534	29.0592	21.3929
361	28.9239
365	29.1971	11.6656	11.0542	9.21343	24.1026	24.2661	19.9478
369	29.4703
373	29.7435	16.3487	12.7569	10.1707	26.4613	27.5051	22.4244
377	30.0167
381	30.2899	17.605	20.1541	15.8283	32.2786	33.754	23.5365
385	30.5631
389	30.8363	18.3902	18.2767	14.6378	30.9559	32.3833	23.0128
393	31.1095	16.5075	16.1951	12.583	28.7218	30.1706	22.1756
396	31.3144	15.6479	14.2852	11.633	26.6455	26.4704	19.8611
398	31.451	14.6704	12.1017	9.13073	25.1005	27.419	20.195
402	31.7242	13.9655	11.1291	9.26865	24.5248	24.7664	18.8097
406	31.9974	15.8571	14.9168	11.5918	27.0747	29.1526	21.6404
410	32.2706	16.2747	16.4046	13.0736	28.2637	28.9555	22.1617
414	32.5438	9.98354	9.44084	8.5688	17.5617	15.6362	15.4322
418	32.817	13.1371	11.3262	8.60027	24.1107	26.3203	21.135
422	33.0902	12.1579	10.8909	9.01768	23.4451	25.3143	21.1083
426	33.3634	14.8758	13.112	10.3386	25.731	27.6272	19.9288
430	33.6366	15.5396	13.6375	10.7651	26.3388	26.827	21.413
434	33.9098	15.5001	10.3614	8.02465	21.7232	23.4624	17.3113
438	34.183	14.9835	13.1091	11.5422	27.1814	27.6378	24.0292
442	34.4562	14.6435	13.3787	11.2491	27.1743	28.022	22.5776
446	34.7294	15.9412	13.1857	10.7202	26.4581	26.8566	20.2639
450	35.0026	11.9134	10.1837	7.95569	23.5637	25.9476	19.7693
454	35.2758	13.7308	10.8333	7.03742	24.0811	24.8686	18.8139
458	35.549	12.4062	9.95883	7.97057	23.9905	25.3304	20.1945
462	35.8222	13.193	10.6536	8.27587	24.3781	25.2587	20.4359
466	36.0954	13.4427	11.2699	8.85872	24.7262	25.9389	18.591
470	36.3686	13.73	11.8674	9.60356	25.0876	26.3788	19.8294
474	36.6418	12.5584	9.6682	7.69135	23.9105	24.8985	18.6223
478	36.915	14.4386	12.5392	9.27757	25.5223	27.4274	20.2208
482	37.1882	13.3618	12.1665	9.18546	25.4591	26.9471	18.3021
486	37.4614	13.5548	11.5824	8.94463	25.4063	26.0484	20.0323
490	37.7346	17.2396	15.7929	12.3958	28.8275	28.4451	21.8158
494	38.0078	15.2418	13.3858	11.3671	26.332	27.1432	20.3531
498	38.281	15.649	15.086	13.1057	28.5295	29.4402	22.8431
502	38.5542	13.478	12.2524	9.47331	25.4623	26.0535	20.5621
506	38.8274	14.4653	13.7957	12.1866	27.1608	27.5232	23.0494
510	39.1006	15.215	12.7427	10.1942	26.7472	27.2512	21.6501
514	39.3738	12.3637	12.0172	9.71595	25.4712	27.494	19.3492
518	39.647	11.5112	10.7939	8.72875	24.3796	25.5972	20.5625
522	39.9202	11.339	10.187	7.86226	23.0974	24.6813	17.9655
526	40.1934	13.271	10.0829	7.2763	22.8028	24.0925	18.1584
530	40.4666	12.415	11.4755	9.06776	25.0595	25.8369	20.4354
534	40.7398	15.2204	13.3021	9.91857	26.6195	27.8	19.2053
538	41.013	13.1969	12.2958	9.43909	25.4398	25.7642	20.7009
542	41.2862	12.6907	12.3799	10.1384	25.8493	27.3537	20.9816
546	41.5594	15.4101	14.4576	11.0202	27.517	27.2834	20.2043
550	41.8326	14.3702	15.4105	13.3884	26.811	28.3247	23.1779
554	42.1058	14.0541	13.7756	12.2112	26.5347	26.482	20.1977
558	42.379	14.6204	12.8901	11.0826	25.7415	26.2367	21.4497
562	42.6522	14.7181	12.6476	10.3637	25.2757	25.8334	20.9799
566	42.9254	17.6791	15.5401	13.8836	26.8611	27.802	20.4389
570	43.1986	14.5226	13.5791	10.4687	26.5868	27.4945	21.4634
574	43.4718	12.1919	10.0838	9.0719	23.6878	24.6593	19.0328
578	43.745	15.063	15.9193	13.9849	27.7197	27.5456	23.6105
582	44.0182	20.0529	20.7944	18.6789	30.925	30.3915	24.6107
586	44.2914	16.0488	13.6117	11.7773	26.4554	26.4871	22.4736
590	44.5646	16.0033	13.4028	11.8384	26.5886	26.016	21.2677
594	44.8378	15.6057	12.9267	11.9398	25.4079	26.6453	21.1466
598	45.111	15.1815	11.7713	10.4951	23.1363	23.4391	20.6637
602	45.3842	17.9742	14.3282	12.3181	25.8416	25.5446	22.0013
606	45.6574	11.9466	6.65625	5.33864	19.2007	21.2741	17.3447
610	45.9306	11.5319	7.624	5.35225	19.6378	21.1077	15.2265
614	46.2038	15.8064	9.34952	6.74855	22.354	23.2574	15.9804
618	46.477	11.8125	9.2361	7.99384	22.6485	24.1732	20.2774
622	46.7502	12.0733	10.4077	8.4058	23.8364	25.0447	19.9257
626	47.0234	11.6959	10.2027	8.10898	23.3654	25.0242	20.629
630	47.2966	12.399	10.4206	8.6563	22.6132	24.6821	16.9087
634	47.5698	12.2233	11.9396	10.3184	24.027	23.5975	18.8455
638	47.843	16.1638	14.4305	13.2946	26.5325	26.3455	19.4705
642	48.1162	14.3061	11.7313	9.56334	23.6421	24.7826	17.589
646	48.3894	13.3988	11.0464	8.37441	22.7488	24.4522	17.7946
650	48.6626	12.7768	8.2398	7.46012	20.089	21.0185	15.2377
654	48.9358	12.5778	8.39021	6.74272	20.492	22.9692	16.1614
658	49.209	14.4769	12.4356	9.92158	22.174	22.5732	17.3845
662	49.4822	14.932	13.8999	10.398	25.0177	24.6771	16.1734
666	49.7554	16.3946	14.8471	11.3269	24.2139	23.3416	17.06
670	50.0286	16.4287	16.504	14.0472	25.289	22.6746	16.0308
674	50.3018	17.8724	17.3712	14.5406	28.372	27.1011	21.6957
678	50.575	19.3686	18.2645	15.3345	29.0457	27.5095	23.1229
682	50.8482	14.4323	12.1786	10.187	25.0347	24.3676	20.6243
686	51.1214	15.4725	13.9484	12.3757	26.6006	26.6924	21.713
690	51.3946	15.1007	13.7687	11.082	26.3526	23.9084	18.5035
694	51.6678	14.8487	11.423	8.73363	24.4421	24.0573	16.2081
698	51.941	20.3915	18.0037	15.1733	29.4413	27.7758	20.9085
702	52.2142	20.9599	20.0755	16.9566	31.3388	28.6787	20.2949
706	52.4874	15.9972	12.3841	10.5579	25.5007	26.3216	19.6362
710	52.7606	17.1242	15.3438	11.7915	27.8894	28.7408	21.5848
714	53.0338	14.6084	12.3513	9.96248	25.6127	26.0992	22.2893
718	53.307	16.5507	16.3638	14.9481	29.1562	29.3864	23.4613
722	53.5802	21.6605	20.9379	18.0032	31.3449	28.8842	20.9118
726	53.8534	21.6584	18.9965	16.7479	29.5058	27.0888	20.9882
730	54.1266	21.4077	19.8719	17.1562	29.5224	28.8423	21.225
734	54.3998	21.4032	21.2581	17.1398	31.994	30.4535	23.1335
738	54.673	13.6744	15.0869	13.0544	18.8071	16.8514	13.9022
742	54.9462	16.8195	17.911	15.5683	22.4636	19.4121	18.0946
748	55.356	11.0729	13.9728	12.5818	13.8933	12.0854	11.0195
754	55.7658	13.5311	12.4449	11.3163	19.0299	17.8332	17.4921
758	56.039	15.1498	13.778	11.4144	20.5834	18.1136	15.8376
762	56.3122	8.41892	8.11801	6.36724	11.8102	11.3145	8.5368
766	56.5854	7.4673	9.30198	7.67974	11.9484	10.7932	8.58076
770	56.8586	8.12114	8.39523	6.87646	10.2856	9.09798	7.0379
774	57.1318	13.8328	18.2437	14.9499	19.0454	15.1336	10.0974
778	57.405	12.1369	13.7522	11.2977	16.7694	12.9876	7.68055
782	57.6782	11.5977	12.1754	10.2179	15.8852	12.1866	8.35555
786	57.9514	12.1344	11.7534	8.91907	25.0141	27.112	20.8289
790	58.2246	9.46317	9.44844	6.74377	22.5316	25.5553	19.2493
794	58.4978	10.6626	9.37377	5.89608	23.2732	25.134	18.1381
798	58.771	11.3887	12.0459	8.34413	25.5703	27.2618	19.8882
802	59.0442	12.4763	11.6137	8.53289	25.7255	27.231	21.8007
806	59.3174	17.1863	18.3403	16.1283	31.1749	31.6055	24.2823
810	59.5906	13.3241	12.813	12.1179	26.4625	27.4257	22.1507
814	59.8638	13.4935	13.0922	10.1611	25.5263	26.6786	19.8829
818	60.137	12.4686	10.8162	8.33649	24.0639	24.5976	17.8478
822	60.4102	11.5775	8.85751	6.35409	21.4585	22.6042	19.4504
826	60.6834	14.9862	11.8855	9.38065	25.0006	27.0924	18.4142
830	60.9566	10.7059	8.92733	5.90342	21.9654	25.6006	20.4678
834	61.2298	11.6672	8.94331	7.35934	22.9018	23.2052	19.5946
838	61.503	12.524	12.6648	10.0153	25.4945	26.0357	20.0905
842	61.7762	12	10.7785	7.79851	23.6366	25.0964	19.9781
846	62.0494	11.5655	9.97028	8.92771	22.1581	23.4118	20.0538
850	62.3226	14.6814	12.7941	10.7753	23.6003	24.3151	17.23
854	62.5958	21.0084	21.661	17.8054	29.9576	28.8407	19.0269
858	62.869	11.8972	14.2548	11.646	17.7693	14.7967	11.4711
862	63.1422	12.7955	12.6539	10.8469	25.8627	27.3116	21.1463
866	63.4154	11.052	8.54102	5.79605	22.1768	24.6286	18.8377
870	63.6886	11.3921	11.8052	9.59293	24.7267	26.3775	21.2778
874	63.9618	10.8777	11.2782	8.92934	24.6691	27.2982	21.3683
878	64.235	9.97199	9.67971	7.51779	23.6452	25.8735	19.6087
882	64.5082	12.9178	13.3527	9.4793	27.0696	28.4211	20.0569
888	64.918	12.0199	13.6086	9.54286	26.8265	29.947	20.9542
892	65.1912	11.3926	10.7546	8.02135	24.1272	26.7868	20.8143
898	65.601	12.0391	9.92229	7.24885	23.1676	24.8877	18.9896
902	65.8742	13.6963	12.4847	9.093	24.4671	26.214	19.6201
906	66.1474	19.7318	14.6905	11.2493	27.6147	28.0612	20.5682
910	66.4206	13.6017	10.6614	8.77157	22.2302	23.8155	19.6487
914	66.6938	18.767	15.9278	12.651	28.1145	27.9453	19.9756
918	66.967	18.456	14.9159	10.6451	27.1209	27.0072	18.5409
922	67.2402	18.7151	17.2876	14.3484	28.6639	27.711	21.532
926	67.5134	15.0007	12.1778	9.62926	25.7388	26.7932	20.6108
930	67.7866	11.0872	8.86564	5.95877	22.0392	24.1944	18.518
934	68.0598	11.1002	9.09962	6.27523	22.3511	24.7086	18.6022
938	68.333	9.30242	8.52545	6.45146	21.5224	23.5488	19.2182
942	68.6062	8.50609	8.07293	5.81346	21.5278	22.9802	18.5032
946	68.8794	10.6496	9.97881	7.53041	22.5889	23.8788	18.7478
950	69.1526	11.4671	9.49995	7.95462	22.0352	23.4287	18.498
954	69.4258	10.7004	8.78807	6.83307	20.8527	24.3123	17.6549
958	69.699	15.2756	13.8089	11.1311	26.612	27.1959	21.2585
962	69.9722	11.7962	8.69048	7.42456	21.6833	23.7667	18.8198
966	70.2454	11.8175	11.1118	8.48157	22.8452	24.2089	19.3652
970	70.5186	11.1948	9.64484	8.01546	22.5535	24.0491	21.3791
974	70.7918	11.7531	10.8985	9.51614	23.7526	25.3832	21.6163
978	71.065	9.13501	8.00575	6.26792	21.0631	22.9855	19.8217
982	71.3382	14.9898	12.3508	10.0313	24.7147	26.1982	19.8405
986	71.6114	10.4358	8.92137	7.52535	22.0625	24.2664	19.9439
990	71.8846	9.5651	9.29217	8.15746	22.2452	24.6198	23.3581
994	72.1578	13.1646	12.5266	10.9045	26.2123	28.5179	22.9848
998	72.431	12.949	14.3054	12.461	27.4183	29.8722	20.8897
1002	72.7042	12.6267	10.7853	9.35119	23.9367	26.2047	23.0764
1006	72.9774	18.4613	17.551	14.2599	28.5743	26.2065	18.3722
1010	73.2506	14.1552	13.9018	11.3698	24.9992	26.9751	19.6806
1014	73.5238	13.2247	11.402	9.31118	24.1036	25.8381	20.6738
1018	73.797	14.6496	15.2516	12.9218	29.1625	30.104	22.5835
1022	74.0702	12.6086	11.7308	7.9932	25.1479	27.1105	22.3041
1026	74.3434	13.7638	15.0991	12.7857	28.5109	29.5341	25.314
1030	74.6166	13.4506	15.4329	12.7793	27.8636	28.2468	26.5875
1034	74.8898	12.4337	12.3921	10.8991	26.5173	27.4973	23.6527
1038	75.163	11.4229	9.49871	7.04703	23.1839	23.7098	17.8648
1042	75.4362	11.6488	14.7878	13.1233	27.7137	27.9417	23.8168
1046	75.7094	8.67511	8.92306	7.34192	23.2372	22.8112	20.9614
1050	75.9826	13.4521	12.7113	9.75527	26.6689	25.8348	20.7355
1054	76.2558	9.37208	10.3379	9.2991	24.6157	24.0602	21.0805
1058	76.529	12.0345	9.28406	6.96951	24.0059	25.1845	20.6531
1062	76.8022	9.64073	10.6723	9.57627	23.513	23.6714	21.3745
1064	76.9388	5.64752	4.59309	4.59309	18.4053	18.9449	17.0125
1068	77.212	10.0743	9.75953	8.21649	24.0305	25.0955	21.4092
1072	77.4852	6.66238	5.50598	3.9791	18.7145	17.0412	13.841
1076	77.7584	12.4117	11.5515	9.77284	24.4912	24.7009	20.6559
1080	78.0316	13.3046	10.9927	7.65122	23.0171	23.0934	15.7453
1084	78.3048	16.9955	15.1002	11.3253	27.9178	28.0628	20.1686
1088	78.578	11.6996	10.5791	8.11611	19.9016	20.1033	15.0528
1092	78.8512	14.2148	11.7412	9.45001	23.5119	22.6329	16.862
1096	79.1244	12.267	11.0882	10.853	23.1262	23.1262	19.6844
1098	79.261	13.38	12.5605	11.0495	23.7967	23.5927	19.6363
1102	79.5342	12.6963	11.104	10.6408	23.3734	24.0813	22.093
1106	79.8074	5.05158	5.47007	4.87824	14.7356	13.0931	11.7764
1110	80.0806	5.30528	5.93944	5.44557	12.7957	11.2006	11.3116
1114	80.3538	10.2913	8.8938	6.89994	23.5339	23.2645	19.8026
1118	80.627	14.0729	10.6814	8.48651	25.1969	23.825	18.1628
1122	80.9002	9.12	7.40459	5.85268	22.3184	20.4167	17.1085
1126	81.1734	14.3961	12.5563	10.7492	26.8378	25.475	21.0899
1130	81.4466	13.6354	11.6629	8.52047	24.6582	26.1951	18.9913
1134	81.7198	13.1862	11.3857	8.41298	24.9205	26.2668	19.5801
1138	81.993	12.9496	10.5596	7.95579	24.1886	25.5775	19.7327
1142	82.2662	16.014	12.9876	10.0914	25.6753	26.3335	20.5371
1146	82.5394	15.7673	12.1829	8.61654	26.477	27.3696	19.7358
1150	82.8126	13.6648	11.8172	9.69754	25.2553	25.6583	18.3201
1154	83.0858	12.8411	11.4923	7.87378	23.9437	24.7295	18.0753
1158	83.359	13.8082	13.3497	8.74072	25.8965	27.5817	18.65
1162	83.6322	11.9408	9.24845	6.82218	22.1055	24.1917	16.7375
1166	83.9054	14.3224	12.027	8.33727	25.0427	26.6431	16.0256
1170	84.1786	14.7365	11.0235	6.92193	24.6309	25.3324	19.6702
1174	84.4518	13.2652	10.1515	7.80985	24.844	26.0459	21.4466
1178	84.725	16.4293	12.2668	9.78354	24.9141	24.6204	18.633
1182	84.9982	15.1836	13.1812	10.9688	26.1002	25.9734	19.1765
1186	85.2714	17.2177	15.1717	11.0388	28.8718	29.0619	19.171
1188	85.408	12.8057	11.4146	8.56708	25.4993	27.55	19.6503
1190	85.5446	18.0672	15.3747	12.1707	28.9296	28.9296	20.71
1194	85.8178	15.1627	11.9994	8.57939	25.8066	27.3185	19.9403
1196	85.9544	12.2159	9.24566	7.26983	23.8116	24.832	19.384
1198	86.091	15.8235	11.7564	9.57234	25.7335	26.6903	20.595
1202	86.3642	13.6102	10.3412	7.86528	23.9877	25.0598	21.5714
1206	86.6374	11.9001	10.4993	7.75551	21.4998	22.5173	15.1422
1210	86.9106	12.8338	10.4115	7.48642	23.2207	24.8368	17.8553
1214	87.1838	17.0349	17.1769	14.8625	28.2768	28.249	19.3568
1218	87.457	16.7183	14.4176	12.1499	26.8609	27.6005	19.9748
1222	87.7302	13.7881	12.4745	10.2824	26.1072	27.7547	23.4444
1226	88.0034	14.8124	12.0515	9.30428	24.9646	27.2963	21.4384
1230	88.2766	16.9082	14.0663	11.6101	26.586	27.0786	20.8381
1234	88.5498	17.0829	15.9605	12.5379	29.223	30.1894	22.9364
1238	88.823	17.5342	14.7601	10.7956	28.0559	29.3385	23.1096
1242	89.0962	17.1174	14.3803	11.6117	27.9081	28.8185	22.412
1246	89.3694	14.8262	12.1465	9.94726	25.754	27.1061	20.1292
1250	89.6426	16.1559	14.363	11.7072	27.4903	27.6573	23.0157
1254	89.9158	15.4604	12.5294	10.3955	26.3337	27.571	20.3221
1258	90.189	18.8216	16.5254	13.1239	29.1228	29.6655	23.7663
1262	90.4622	18.7327	16.2425	14.3487	29.5198	29.3595	23.7818
1266	90.7354	15.3513	13.0946	11.9749	25.9067	27.0031	22.4457
1270	91.0086	17.5129	15.6297	13.9175	27.9479	28.5645	21.1044
1274	91.2818	15.2783	14.2175	11.3357	27.4026	29.2048	21.7373
1278	91.555	12.8988	10.3939	8.44798	24.9131	25.7017	21.9457
1282	91.8282	17.7682	16.1896	13.2137	27.8784	29.4945	21.4685
1286	92.1014	15.1134	12.6797	11.1326	25.567	25.8254	24.2725
1290	92.3746	17.9106	16.3548	13.9711	29.0701	29.288	24.1812
1294	92.6478	16.5792	12.8909	10.9099	26.3094	27.2481	22.068
1296	92.7844	13.3635	10.857	9.69258	24.5193	26.0079	21.8455
1298	92.921	13.0918	15.4058	14.609	22.3648	17.0777	13.0512
1302	93.1942	16.5401	12.7238	9.98306	25.7791	26.9722	22.5908
1306	93.4674	16.6181	13.1403	10.889	26.1041	27.4248	22.3496
1310	93.7406	16.5775	14.113	11.127	27.5684	28.1906	22.1169
1314	94.0138	17.1613	13.8929	11.2439	27.0455	27.9007	23.6945
1318	94.287	19.5991	17.4808	14.9744	30.3161	30.5057	24.9238
1322	94.5602	15.5765	12.7241	9.79133	26.0234	27.2997	22.9913
1326	94.8334	17.3837	12.9088	10.67	25.5712	26.4609	22.0258
1330	95.1066	14.01	12.0046	10.6083	24.1441	25.2864	21.6921
1334	95.3798	15.2313	13.7976	10.7476	25.478	27.0717	18.2758
1338	95.653	16.413	13.4069	9.31236	25.9897	27.14	16.6861
1342	95.9262	16.4078	14.4447	11.5543	27.179	27.4341	20.1466
1346	96.1994	14.5816	12.6948	9.7285	25.0103	24.9129	17.925
1350	96.4726	15.5373	13.1703	9.77654	25.6643	25.6132	17.654
1354	96.7458	12.7701	10.2446	8.36317	23.8101	25.1679	18.5208
1358	97.019	16.0516	12.0692	10.2394	24.8582	24.9443	22.4307
1362	97.2922	14.2308	9.96674	8.32275	22.8161	23.4083	21.3587
1366	97.5654	14.4477	10.5014	8.90825	24.7974	25.1105	18.9032
1370	97.8386	17.9721	14.3465	11.0469	28.2042	27.2255	20.1193
1374	98.1118	8.61502	6.60649	4.76099	13.3085	13.7297	10.0776
1378	98.385	9.12077	6.40199	4.22289	14.3306	14.2303	10.6459
1382	98.6582	16.0662	12.9465	10.397	26.7265	26.2799	20.2582
1386	98.9314	16.2376	12.4096	10.115	26.5201	26.1797	20.5842
1390	99.2046	17.7148	16.5217	11.8428	30.1753	30.1476	20.7573
1394	99.4778	14.0593	11.7687	8.61365	25.4754	27.2945	19.7311
1396	99.6144	17.8338	16.059	11.9118	30.3404	31.9879	20.0912
1398	99.751	14.4444	12.0052	9.51004	24.291	24.0551	20.0225
1402	100.024	19.5214	16.0316	12.183	28.3321	28.9305	20.2038
1406	100.297	19.6101	18.829	14.2223	31.5841	31.8875	22.3234
1410	100.571	20.6184	19.3944	14.4165	31.0058	30.4488	20.3778
1414	100.844	18.9916	16.522	12.9537	28.9001	29.2364	19.4702
1418	101.117	16.4551	15.2442	10.9714	28.0816	29.5231	20.4842
1422	101.39	20.48	20.2612	15.131	32.1044	31.8528	21.9202
1426	101.663	19.8668	19.1327	15.036	31.2128	30.527	21.2686
1430	101.937	16.2074	15.4653	12.2744	24.5868	23.7135	16.4182
1434	102.21	19.2047	19.7361	15.0507	30.9006	30.295	22.168
1438	102.483	19.2414	17.3891	13.8534	29.6077	29.8417	19.9722
1442	102.756	15.3776	13.5826	10.3171	22.9302	23.7128	16.2
1446	103.029	13.8728	12.1083	8.90604	20.3725	20.2934	13.7753
1450	103.303	14.8756	13.9181	10.9796	23.0175	23.0285	14.8226
1454	103.576	17.7353	17.8949	14.1848	25.0143	23.3057	15.6108
1458	103.849	23.7224	24.8436	22.4181	35.3533	32.495	24.6709
1462	104.122	14.473	15.1593	12.0432	20.945	19.7515	14.8364
1466	104.395	24.6219	24.7389	21.7562	32.8099	28.1984	21.3506
1470	104.669	24.8512	26.3925	22.3345	36.2979	34.1654	22.878
1474	104.942	16.4145	16.3192	13.458	24.2459	22.3515	17.3202
1478	105.215	18.2514	17.7379	15.0776	25.9099	24.861	17.2835
1482	105.488	15.4117	15.4325	12.7225	22.9509	21.4024	16.2071
1486	105.761	21.672	20.5605	17.9495	30.5032	27.8051	19.6569
1490	106.035	23.1296	28.2177	26.3031	35.627	33.2146	28.2971
1494	106.308	21.8271	21.738	19.1472	31.4482	28.8002	21.1301
1496	106.444	15.0788	13.3668	10.3883	20.9899	19.273	14.0623
1498	106.581	17.7327	18.2302	15.622	26.8678	24.8423	19.346
1502	106.854	20.2335	18.4402	14.9474	29.7726	28.4962	20.768
1506	107.127	19.6712	19.7055	16.288	27.976	26.8259	18.4485
1510	107.401	16.8421	15.7867	13.7961	23.6833	22.2587	17.0987
1514	107.674	15.6286	15.3066	13.0097	22.9162	22.881	17.1588
1518	107.947	17.0266	17.4622	14.7454	24.3595	23.8498	16.9454
1522	108.22	19.3603	20.1508	16.97	28.0951	26.2982	18.7185
1526	108.493	22.5429	21.8558	18.3594	31.607	29.2863	22.2842
1530	108.767	21.7789	21.2277	17.0942	32.245	30.0671	22.414
1534	109.04	22.0758	22.6018	18.8619	31.2481	29.6645	22.2115
1538	109.313	22.2494	22.7206	20.8528	31.959	29.1672	25.0873
1542	109.586	23.7322	25.1964	21.9876	34.7852	32.4298	25.448
1546	109.859	21.233	21.65	19.0114	31.0883	28.9139	25.2696
1550	110.133	22.0535	23.6085	20.3372	32.3824	31.9086	25.2741
1554	110.406	23.4646	23.8336	21.4693	33.6732	31.9988	27.9546
1558	110.679	21.9646	22.6327	20.3939	31.096	27.8807	23.172
1562	110.952	19.1202	20.432	18.2575	29.8315	27.1136	24.4471
1566	111.225	21.2778	17.6591	14.5001	29.4062	27.4812	23.195
1570	111.499	22.1466	23.8043	21.9948	32.4765	30.6824	24.5184
1574	111.772	22.5716	23.7434	22.3474	31.2175	29.4201	26.0145
1578	112.045	17.2898	15.8388	13.7865	26.4377	24.6268	22.6641
1582	112.318	20.8223	20.6124	17.923	29.0664	27.0927	21.7989
1586	112.591	19.9423	17.9822	15.785	29.1138	28.5119	22.2528
1590	112.865	22.077	20.2233	16.0614	30.6678	29.1646	23.4317
1594	113.138	16.5133	16.6289	14.2384	25.6749	25.1908	20.6207
1596	113.274	18.3663	18.9839	16.5971	30.2209	28.3666	22.4339
1598	113.411	14.762	12.4365	10.1385	23.1341	23.1789	18.9712
1604	113.821	20.4246	24.6594	20.5425	31.2925	28.2973	16.2363
1606	113.957	16.2713	13.3693	11.151	21.6328	21.8771	14.7345
1610	114.231	19.4036	17.5238	15.1101	28.0855	25.6779	20.4977
1614	114.504	24.731	24.4256	19.1651	34.3775	31.5428	20.9021
1618	114.777	19.2811	20.332	17.2167	30.388	28.4049	19.4941
1622	115.05	20.433	21.9198	19.6431	31.5096	28.7603	20.6815
1626	115.323	18.3527	16.4945	14.1575	26.242	24.3872	18.5932
1630	115.597	20.3644	20.4303	17.9938	27.4312	24.7188	24.3065
1634	115.87	19.3614	20.2127	18.2762	28.3285	24.9011	24.7435
1638	116.143	21.3677	21.0457	18.2474	29.315	25.6517	22.3001
1642	116.416	20.4533	21.011	18.4507	28.2457	25.8218	22.3595
1646	116.689	22.2427	22.3493	18.8164	30.7332	29.0424	24.038
1650	116.963	18.8026	19.9377	16.9028	28.8607	27.2371	24.5658
1654	117.236	20.384	20.5786	17.5003	29.332	26.4174	19.1447
1658	117.509	20.112	19.7852	17.4498	28.4513	26.0919	22.3705
1662	117.782	21.3655	20.4967	17.2799	29.0698	25.6495	23.0864
1666	118.055	20.9083	21.8441	18.003	29.6384	26.7755	22.577
1670	118.329	17.4864	18.8143	16.4888	26.3999	22.0503	21.6959
1674	118.602	23.0926	25.66	20.6375	31.5196	26.8867	22.5432
1678	118.875	21.6841	21.4947	17.7956	29.8593	24.5519	20.7605
1682	119.148	18.4536	19.8017	15.6273	25.1419	21.0667	16.2895
1686	119.421	20.6769	25.4722	21.0746	31.2737	25.158	16.7257
1690	119.695	16.9704	22.0009	19.6216	25.904	20.0998	14.9462
1694	119.968	22.403	23.0494	18.8744	31.6381	27.2612	19.8164
1698	120.241	13.4754	12.3094	10.9771	19.9253	17.9619	15.1924
1700	120.378	13.7501	12.6391	10.7491	19.6226	18.5552	14.4114
1702	120.514	17.1914	14.8437	12.103	25.3828	25.7405	21.5061
1706	120.787	15.9228	12.8479	10.4548	24.7417	24.7595	20.6201
1710	121.061	9.88008	9.45333	7.91759	15.7153	14.2431	10.6968
1714	121.334	7.46266	6.98615	6.02786	10.3132	9.09128	6.08044
1718	121.607	12.9967	12.3577	10.3293	19.2546	17.8074	14.1494
1722	121.88	15.9651	15.8469	13.5374	23.473	21.2357	16.033
1726	122.153	9.11669	9.33957	8.4493	13.3286	11.6743	8.88132
1730	122.427	13.1179	11.7103	10.132	18.7609	17.2613	12.1652
1734	122.7	19.611	16.822	14.3587	24.8288	22.8266	16.2549
1738	122.973	12.0472	10.9587	8.17126	14.0119	11.6632	8.27951
1742	123.246	18.2739	17.7664	13.8419	24.3539	20.209	13.1059
1746	123.519	22.3644	20.0122	17.6329	27.9948	22.5367	15.8857
1750	123.793	15.5708	15.2961	12.622	18.495	13.362	9.3786
1754	124.066	26.9873	27.5877	23.0587	32.7714	27.7719	18.9952
1758	124.339	22.1935	21.3426	18.3766	25.231	19.9365	11.6259
1762	124.612	14.4982	14.887	13.3083	18.2858	14.1827	9.18896
1766	124.885	23.919	22.5994	18.2912	30.7426	26.8114	16.2066
1770	125.159	23.5709	22.4947	17.636	28.4981	23.2825	14.7151
1774	125.432	22.2007	22.869	18.8326	29.3574	23.049	12.0894
1778	125.705	23.3043	23.938	20.4801	30.8873	25.1381	16.0224
1782	125.978	23.5776	24.0017	19.5974	26.8765	20.6522	10.8303
1786	126.251	20.1936	21.1476	19.6532	24.7225	17.4478	10.0582
1790	126.525	15.8506	16.7316	15.3903	20.9854	13.942	8.45407
1794	126.798	12.2875	11.6468	9.52093	14.4739	11.8878	7.20465
1798	127.071	12.8878	12.4955	9.94945	16.4177	12.1873	7.24246
1802	127.344	23.8488	20.7027	15.8352	26.0684	19.6246	11.5498
1806	127.617	24.0256	22.2839	18.7913	28.0555	20.7183	15.7365
1810	127.891	24.5807	22.6148	20.0668	26.7829	19.1322	13.9434
1814	128.164	17.2213	16.8847	15.4978	17.8798	10.8824	7.06187
1818	128.437	13.2177	13.8318	11.6718	14.9049	9.62627	4.21797
1822	128.71	21.9125	23.4268	20.2316	26.9589	21.3236	13.823
1826	128.983	20.0287	19.683	16.4909	23.1486	16.0526	10.5758
1830	129.257	20.433	22.6513	19.1952	25.3328	18.9858	10.8361
1834	129.53	16.8019	18.1036	15.5681	19.6291	11.8685	6.90405
1838	129.803	15.5873	17.3693	14.0389	20.6256	16.3487	7.96598
1842	130.076	21.3055	22.674	19.0431	26.9476	21.6184	12.3931
1846	130.349	14.0951	16.2144	13.4175	17.2523	11.735	6.29467
1850	130.623	20.4085	23.6724	19.8162	26.6949	18.61	11.1514
1854	130.896	16.3557	14.3794	11.7405	18.3035	14.4732	8.79864
1858	131.169	14.5167	13.4983	11.9909	18.8191	14.5969	9.55736
1862	131.442	14.8919	15.2727	12.2496	19.3169	14.9222	10.7119
1866	131.715	19.5335	18.8654	15.2978	23.9161	17.9702	10.5229
1870	131.989	20.8202	19.4047	16.5955	26.7716	23.1195	16.0329
1874	132.262	19.1184	19.8167	16.2528	27.0017	22.5064	15.9463
1878	132.535	14.3914	14.1647	12.5769	22.7206	22.6785	18.0787
1882	132.808	14.315	13.9138	11.4896	25.2544	24.3748	16.7855
1886	133.081	15.8421	14.2844	10.9171	26.1111	25.4113	19.0675
1890	133.355	15.5997	15.5074	12.7753	27.2864	27.0109	19.66
1894	133.628	16.4996	17.2025	16.088	28.831	26.3608	21.7187
1898	133.901	17.6303	19.563	15.99	31.6312	29.5981	23.3094
1902	134.174	19.9232	20.5383	17.2572	32.3122	29.4366	22.7267
1906	134.447	20.3896	22.2831	19.6948	32.2462	30.1244	24.5464

## Sheet: Xero Wapo
Sample	Age (approx), ka, BP assumed	tropical forest	warm-temperate forest	temperate forest	savanna and dry woodland	grassland and dry shrubland	tundra
0	0	28.0929	29.1713	19.7762	17.3639	17.3639	2.74921
20	2.08	17.8001	18.156	17.1923	11.391	11.391	2.9173
40	4.16	24.7132	25.3698	16.6443	14.6833	14.6833	4.34131
60	6.24	33.9258	33.9258	17.9292	21.4062	21.4062	5.957
80	8.32	26.9912	28.6152	15.3821	17.7672	17.7672	4.24671
110	11.44	16.4519	17.3407	16.529	11.4159	11.4159	3.46501
130	13.52	17.2175	18.3844	14.9985	13.3519	13.3519	3.50059
150	15.6	20.615	19.9446	19.6689	15.255	15.255	3.15565
170	17.68	21.1989	21.8957	17.7665	14.6374	14.6374	2.51211
180	18.72	33.2939	33.4979	23.357	19.087	19.087	3.98824
188	19.552	28.969	28.7748	23.1887	21.5401	21.5401	3.20122
195	20.28	19.46	20.3568	17.9385	15.5568	15.8499	2.20646
220	22.88	24.299	23.8377	20.3677	18.4318	18.4318	4.74186
240	24.96	21.4168	23.0751	20.4477	16.1651	16.5983	4.39569
260	27.04	21.0205	22.311	18.4829	16.2251	16.2251	3.54975
280	29.12	17.0895	17.0895	14.1356	16.2914	16.2914	1.38233
300	31.2	24.1791	24.6586	19.8107	16.3501	16.3501	3.35624
320	33.28	16.8716	16.6199	14.3353	14.9149	14.9149	3.19757
340	35.36	25.6013	26.3559	19.8135	14.1944	15.6668	3.36508
360	37.44	27.5508	28.4393	20.7143	16.3653	17.0908	4.99181
380	39.52	16.0679	17.703	15.4074	10.5391	10.5391	3.95927
392	40.768	14.0145	14.5089	12.6721	8.66015	8.66015	3.17162
420	43.68	26.8529	27.4853	18.6077	13.3541	13.3541	3.8441
440	45.76	27.356	28.3674	20.189	15.3407	16.3522	3.13759
460	47.84	28.4138	28.9408	21.3693	15.8323	15.087	2.10819
480	49.92	22.0336	23.9013	16.9518	12.7536	12.7536	1.61188
500	52	31.5093	33.6097	22.6239	17.163	17.163	3.98469
520	54.08	27.9834	29.7212	19.8493	14.7439	14.7439	1.99824
540	56.16	26.229	27.2479	19.3385	13.2848	14.1167	3.20558
560	58.24	26.1756	27.0331	19.2199	13.7235	14.3299	2.26289
580	60.32	29.5744	28.9658	19.8969	13.608	13.608	2.6864
600	62.4	29.7104	30.2685	20.9799	17.7717	17.7717	2.64117
620	64.48	26.624	26.5126	21.2209	19.303	19.303	2.32949
640	66.56	31.9192	31.2874	23.4389	18.9118	18.9118	1.26365
660	68.64	32.2553	32.2553	24.6368	24.4163	24.4163	3.34816
680	70.72	25.3289	25.3289	19.6433	18.1133	18.1133	1.38675
700	72.8	29.5383	30.3805	22.891	16.2099	16.8054	2.2224
720	74.88	31.9808	33.8728	26.7266	16.3718	16.9695	2.21542
740	76.96	31.449	32.6237	23.4411	17.319	19.0592	3.65026
760	79.04	31.0945	31.4915	18.1372	18.4923	19.0346	4.00117
780	81.12	36.1106	36.6511	24.5788	21.3067	21.7439	3.24201
798	82.992	32.6253	30.544	22.4818	18.4721	18.4721	3.63611
820	85.28	29.7263	31.3561	25.6512	18.042	18.5144	3.1162
840	87.36	33.2026	33.8613	24.8495	19.3436	19.8094	2.73944
860	89.44	28.0748	27.3912	20.5682	19.9559	19.9559	3.10043
880	91.52	31.684	32.7209	24.3063	18.5199	19.0384	2.28866
889	92.456	35.166	34.692	26.0794	20.4037	20.8778	4.0931
910	94.64	26.2171	27.3305	22.0481	15.9655	15.3227	2.5713
934	97.136	36.2262	35.6555	24.4107	21.7736	21.7736	2.75573
950	98.8	36.6747	37.8613	24.9365	23.1967	23.6882	4.09289
966	100.464	28.7048	27.9877	20.3564	22.9711	22.9711	2.10224
988	102.752	32.5486	33.2045	24.9845	20.2272	20.2272	3.12135
1030	107.12	31.1848	31.316	22.3945	21.5902	21.5902	3.42269
1048	108.992	31.5926	31.8165	21.5253	16.9805	16.9805	2.61091
1068	111.072	31.1271	31.3895	22.9345	19.49	19.49	4.15146
1092	113.568	32.1222	33.6471	23.9232	16.5411	17.0234	3.31871
1114	115.856	28.7748	28.0376	23.5057	18.1085	19.0114	2.91699
1138	118.352	29.0527	29.5919	21.2349	17.2102	17.2102	1.84082
1146	119.184	29.8369	31.6868	24.4145	19.3189	19.3189	2.52344
1162	120.848	30.6859	31.2108	20.3185	18.2176	18.7425	1.792
1180	122.72	33.0162	32.8862	26.9935	22.5241	22.5241	4.10569
1188	123.552	29.7022	30.2511	25.5364	23.6791	23.6791	2.95394
1196	124.384	30.8829	30.4465	23.2628	20.3463	20.3463	2.36296
1208	125.632	26.4712	26.2582	21.5955	19.576	20.0903	2.1788
1219	126.776	28.4562	29.8565	22.6544	18.8246	18.8246	1.89503
1228	127.712	33.0462	33.259	24.7887	20.396	20.396	3.68963

## Sheet: Lynchs Crater
Sample	Depths	Sample Age	Age (ka), BP assumed	tropical forest	warm-temperate forest	temperate forest	savanna and dry woodland	grassland and dry shrubland	tundra
10	10	2733.33	2.73333	69.0499	55.9139	37.482	48.1008	45.261	28.0283
20	20	3395.24	3.39524	53.3426	47.641	32.0035	23.6409	20.8985	9.22155
30	30	4057.14	4.05714	47.2398	41.4369	22.4872	17.1236	14.6236	7.06435
40	40	4719.05	4.71905	40.7277	37.926	21.9524	9.11224	7.72992	3.38075
50	50	5380.95	5.38095	41.3856	39.6125	24.879	11.3121	7.66064	2.44949
60	60	6042.86	6.04286	39.9041	43.9842	30.4517	16.2178	11.8794	3.07562
70	70	6704.76	6.70476	57.2256	46.0727	30.8045	63.4274	60.8065	25.9834
80	80	7366.67	7.36667	30.5224	25.8368	13.1343	24.6294	19.363	7.11101
100	100	8690.48	8.69048	45.887	20.8726	12.2439	42.5766	37.0746	26.6696
125	125	10345.2	10.3452	19.6529	14.5539	6.108	20.8076	16.3326	5.91552
150	150	12000	12	27.5533	21.2921	12.4617	26.7228	20.9545	10.7574
175	175	12666.7	12.6667	27.1876	20.6117	10.0942	26.0251	21.6849	9.86394
200	200	13333.3	13.3333	28.6913	20.1519	11.5429	29.8658	24.2575	16.7015
225	225	14000	14	26.1824	17.9715	9.60515	26.456	22.2237	10.9188
250	250	14666.7	14.6667	23.7766	17.3424	9.19468	24.0039	19.4015	15.9001
275	275	15333.3	15.3333	27.0842	19.311	10.1327	26.5927	21.0035	16.8
300	300	16000	16	20.4387	15.6618	8.23769	19.6195	13.8395	4.7769
325	325	16666.7	16.6667	23.6584	19.7898	10.0984	21.996	17.3865	12.8615
350	350	17333.3	17.3333	19.5317	15.5896	7.18914	19.8722	14.327	5.10463
375	375	18000	18	21.253	18.6945	7.60256	19.1347	14.5895	4.53635
425	425	19333.3	19.3333	29.3068	22.1114	9.6125	27.048	23.6794	14.2601
450	450	20000	20	25.6389	17.309	8.53028	25.6389	21.5742	12.2319
475	475	20666.7	20.6667	19.329	15.4993	5.47519	18.1743	13.8538	4.98441
500	500	21333.3	21.3333	19.1123	14.8923	6.53391	20.7675	16.5744	11.1094
525	525	22000	22	21.9471	19.0703	10.6421	22.555	18.942	7.63699
550	550	22666.7	22.6667	23.2902	19.0261	8.40976	22.4539	19.2134	11.7902
575	575	23333.3	23.3333	27.3332	21.6189	8.08548	23.9929	20.3429	18.8222
600	600	24000	24	47.6984	29.2871	16.6031	50.4311	43.9587	27.72
625	625	25500	25.5	29.8928	27.4424	13.7191	28.2433	22.7091	7.44857
650	650	27000	27	33.4395	29.3774	18.0859	34.7222	29.6616	19.3819
675	675	28500	28.5	36.3906	30.7809	17.2618	31.2091	26.6273	24.3679
700	700	30000	30	43.7179	30.7756	17.7886	44.3325	39.3252	21.2213
725	725	31500	31.5	45.0682	28.3269	14.3112	38.9794	33.8614	19.5573
750	750	33000	33	36.2022	27.0117	13.7287	34.7114	31.6208	14.8532
775	775	34500	34.5	57.4735	40.0432	21.8309	59.3662	53.9546	34.0491
800	800	36000	36	52.2924	38.9293	22.897	52.2569	47.2968	29.904
825	825	37500	37.5	51.1463	33.3278	20.2206	54.941	49.9937	28.1189
850	850	39000	39	46.3786	36.7353	21.4703	45.1194	41.9736	18.6551
875	875	40500	40.5	51.4517	41.982	20.1974	42.4792	40.1428	26.4924
900	900	42000	42	44.2943	43.3245	25.419	45.8441	43.8394	20.5497
925	925	43500	43.5	45.3386	45.8769	29.4955	50.7581	46.5914	16.398
950	950	45000	45	39.1378	36.4124	19.6014	35.9593	33.657	14.7436
975	975	45388.9	45.3889	43.0425	49.3964	33.1322	46.557	43.4601	14.9953
1000	1000	45777.8	45.7778	42.03	46.7602	27.8098	44.3727	41.4887	13.2124
1025	1025	46166.7	46.1667	36.7919	40.1237	26.5058	47.0926	44.1958	9.89422
1050	1050	46555.6	46.5556	36.9167	40.1986	28.0745	47.6981	45.4065	14.6528
1075	1075	46944.4	46.9444	37.4681	49.2997	33.4938	50.4017	46.6619	12.8016
1100	1100	47333.3	47.3333	38.3484	39.3872	24.7386	39.6438	36.0582	11.0512
1125	1125	47722.2	47.7222	40.0616	45.313	25.7773	40.8085	37.0513	11.1726
1150	1150	48111.1	48.1111	36.965	38.0528	21.8169	41.0597	37.3712	12.3877
1175	1175	48500	48.5	34.4729	40.7488	24.0376	46.4342	43.184	12.443
1200	1200	48888.9	48.8889	34.3339	37.7131	21.0735	37.8067	37.2616	13.3438
1225	1225	49277.8	49.2778	31.571	38.4086	23.6334	35.9324	33.9833	7.63501
1250	1250	49666.7	49.6667	40.66	40.1608	19.7022	33.265	29.2546	13.1874
1275	1275	50055.6	50.0556	34.2642	34.1501	17.7745	34.3771	33.0004	14.3344
1300	1300	50444.4	50.4444	30.2861	27.0106	12.3244	29.1282	26.9146	7.55464
1325	1325	50833.3	50.8333	41.6088	35.952	20.057	39.023	37.023	17.4876
1350	1350	51222.2	51.2222	39.3082	39.5627	22.6692	40.4543	38.4219	14.4824
1375	1375	51611.1	51.6111	40.3698	38.6432	20.886	46.7625	44.236	15.4767
1425	1425	52388.9	52.3889	42.2254	53.4026	32.0289	38.7799	35.4912	12.1713
1450	1450	52777.8	52.7778	43.0055	44.6245	23.125	32.122	30.9103	11.8034
1475	1475	53166.7	53.1667	44.5782	43.693	21.0486	33.2228	31.1044	6.57514
1500	1500	53555.6	53.5556	45.3474	42.4301	16.108	34.8771	32.9061	8.58671
1525	1525	53944.4	53.9444	51.6154	48.1374	17.5151	30.6931	28.9097	6.03182
1550	1550	54333.3	54.3333	46.2365	44.3931	14.8151	32.8567	31.2127	5.4719
1575	1575	54722.2	54.7222	43.9717	40.7455	13.5591	29.019	27.751	7.437
1600	1600	55111.1	55.1111	49.5666	48.515	16.251	32.1555	30.4448	5.19183
1625	1625	55500	55.5	53.7793	50.9563	19.8884	33.5806	31.9254	6.65948
1650	1650	55888.9	55.8889	49.2158	47.378	17.8486	35.8036	33.4656	7.70178
1675	1675	56277.8	56.2778	49.3236	47.7171	15.4122	31.9713	30.98	5.66421
1700	1700	56666.7	56.6667	49.5874	47.6502	18.3668	32.2713	30.0445	5.97499
1725	1725	57055.6	57.0556	46.4446	44.3948	17.3307	34.7639	31.9149	9.80658
1750	1750	57444.4	57.4444	43.6551	42.5498	17.7245	33.6215	30.8132	8.70086
1775	1775	57833.3	57.8333	45.3315	44.6683	19.558	34.5338	30.0967	8.99653
1800	1800	58222.2	58.2222	45.7016	45.3715	20.1604	31.9948	30.284	7.48731
1825	1825	58611.1	58.6111	41.4811	42.0245	20.2193	37.8665	35.5829	10.8989
1850	1850	59000	59	40.4375	39.5997	16.813	35.0972	29.1619	7.54823
1875	1875	59750	59.75	44.4866	39.9273	16.8568	31.9119	28.3723	9.14553
1900	1900	60500	60.5	33.3226	33.3226	18.4221	32.8327	27.2217	8.26738
1925	1925	61250	61.25	42.5559	40.9554	19.0417	37.6543	35.1629	13.8388
1950	1950	62000	62	39.176	40.7104	20.7767	41.0039	37.2467	11.3603
1975	1975	62750	62.75	43.2437	40.4903	17.9588	36.5475	29.6901	9.64369
2000	2000	63500	63.5	41.7127	38.5604	16.7432	40.0388	37.0099	12.2504
2025	2025	64250	64.25	44.7441	40.7089	17.0139	35.4081	33.1582	9.5586
2050	2050	65000	65	36.2964	32.4695	15.2986	33.5836	29.8753	11.0302
2075	2075	65750	65.75	37.0983	35.2969	15.359	33.8928	31.2475	9.32111
2100	2100	66500	66.5	47.6053	43.9267	17.6257	38.1373	35.6871	13.7861
2125	2125	67250	67.25	48.3797	45.6472	16.9691	38.3971	34.2862	13.1426
2150	2150	68000	68	46.3934	43.7402	14.032	38.2535	36.3846	11.1031
2175	2175	68750	68.75	46.5627	45.787	19.0509	38.301	35.7654	12.8648
2200	2200	69500	69.5	44.7257	44.6749	20.074	38.1211	35.5749	11.1086
2225	2225	70250	70.25	44.9381	41.2084	14.5429	37.458	35.7499	12.9748
2250	2250	71000	71	43.8738	40.9502	14.626	33.3391	33.1451	7.71456
2275	2275	71750	71.75	41.9567	42.9942	16.0149	39.5507	37.6135	8.34735
2300	2300	72500	72.5	38.9614	40.9663	17.1916	34.6429	34.4204	5.22123
2325	2325	73250	73.25	49.4861	49.4861	18.5674	35.6497	34.5781	7.80687
2350	2350	74000	74	48.9787	46.8458	17.4836	32.3408	31.9582	4.88762
2375	2375	74794.1	74.7941	38.6561	39.423	18.6919	21.3322	19.6172	2.57248
2400	2400	75588.2	75.5882	37.8953	38.6083	16.2716	18.2309	16.6629	1.72133
2425	2425	76382.4	76.3824	41.2981	43.6389	21.4416	16.61	14.9548	2.48282
2450	2450	77176.5	77.1765	39.0209	43.5153	23.9135	20.2897	19.4446	0
2475	2475	77970.6	77.9706	33.4032	35.8771	19.1304	12.4606	11.5967	0.863868
2500	2500	78764.7	78.7647	41.5599	42.7559	24.9274	20.3248	18.6524	1.67248
2525	2525	79558.8	79.5588	42.447	45.2401	26.9419	17.5604	17.5604	2.52646
2550	2550	80352.9	80.3529	35.3622	38.8694	22.3971	11.69	12.1851	0.845154
2575	2575	81147.1	81.1471	40.5757	42.269	26.6006	12.9191	10.9347	1.98447
2600	2600	81941.2	81.9412	37.8546	41.9655	26.2497	15.6415	13.6212	1.16642
2625	2625	82735.3	82.7353	35.9995	39.1424	22.0955	11.7769	10.5859	1.19098
2650	2650	83529.4	83.5294	40.4701	41.0678	22.9142	13.5742	12.7577	0.816497
2675	2675	84323.5	84.3235	39.1321	39.4847	18.3622	18.3735	16.1212	0.851257
2700	2700	85117.6	85.1176	49.8549	50.1697	20.9927	23.4815	20.7847	1.66667
2725	2725	85911.8	85.9118	48.2157	47.9932	21.1878	18.7559	17.1761	1.43839
2750	2750	86705.9	86.7059	48.4854	49.668	22.3568	27.4492	25.5793	1.67248
2775	2775	87500	87.5	43.5432	43.9191	19.2909	23.4441	22.2319	1.18262
2800	2800	88294.1	88.2941	40.05	40.5416	18.7344	19.4324	18.5932	2.02596
2825	2825	89088.2	89.0882	46.9104	45.5182	19.986	18.9113	17.4779	2.82562
2850	2850	89882.4	89.8824	44.1778	45.7121	19.1298	19.0745	17.0189	0
2875	2875	90676.5	90.6765	33.1021	35.2769	15.9563	13.3035	13.3035	0.821995
2900	2900	91470.6	91.4706	43.1971	43.4781	20.4993	23.3034	22.6847	3.15416
2925	2925	92264.7	92.2647	42.2096	42.4699	18.5314	18.7099	17.0715	0.819232
2950	2950	93058.8	93.0588	40.8712	39.9693	16.9434	20.7094	19.0542	3.50579
2975	2975	93852.9	93.8529	44.3403	45.0213	18.8915	20.303	19.2907	1.42374
3000	3000	94647.1	94.6471	44.4954	42.2556	18.0699	19.731	17.9445	2.06284
3025	3025	95441.2	95.4412	36.9596	37.8477	18.2011	16.5023	15.7174	1.07211
3050	3050	96235.3	96.2353	42.4944	43.9086	18.3936	19.6193	16.6425	1.63299
3075	3075	97029.4	97.0294	44.808	46.0114	14.6833	20.263	17.938	1.98447
3100	3100	97823.5	97.8235	41.643	44.0664	18.4319	23.1082	22.0817	3.44329
3175	3175	98617.6	98.6176	39.1285	41.7409	16.4356	17.0109	15.5079	2.66003
3200	3200	101000	101	39.0767	37.918	15.8853	21.2418	19.5978	3.81878
3225	3225	101794	101.794	43.944	43.4538	16.1609	21.4357	20.2653	3.51123
3250	3250	102588	102.588	41.8845	41.9423	19.1797	20.2062	18.1995	2.31714
3300	3300	103382	103.382	41.707	44.7747	18.1665	21.6337	19.0343	1.42374
3325	3325	104971	104.971	42.0503	43.0108	15.1816	22.7617	20.4128	3.17934
3350	3350	105765	105.765	42.1198	45.7769	17.0956	20.0409	16.631	3.13637
3375	3375	106559	106.559	39.6159	41.4796	22.4598	17.3084	16.1537	2
3400	3400	107353	107.353	47.9767	47.9767	26.4698	19.77	17.5467	1.62758
3450	3450	108147	108.147	43.0773	45.6855	21.3801	24.563	21.0027	2.816
3475	3475	109735	109.735	39.4914	43.9311	18.1214	24.2559	21.6909	2.21599
3500	3500	110529	110.529	44.3952	46.1305	18.8305	20.6718	18.6874	3.17594
3575	3575	111324	111.324	39.9348	39.458	15.1937	15.5415	14.1319	1.15087
3600	3600	113706	113.706	41.9182	43.4859	20.3879	25.8352	24.4869	3.65713
3625	3625	114500	114.5	46.3378	46.8145	21.487	20.0468	18.2271	2.77845
3650	3650	115294	115.294	52.1337	52.2811	20.9433	19.3213	16.8385	1.85058
3725	3725	116088	116.088	53.7548	57.4123	24.7863	22.8811	20.7063	4.2302
3755	3755	118471	118.471	51.1245	50.0678	15.6372	18.5976	16.9309	1.17851
3775	3775	119424	119.424	45.883	49.4937	18.2448	15.3353	13.491	1.42857
3800	3800	120059	120.059	45.8829	45.9322	20.139	10.3246	9.50265	1.64399
3825	3825	120853	120.853	37.7199	39.2899	17.3598	5.48506	4.66027	0
3875	3875	121647	121.647	43.9568	44.9136	21.0472	6.50805	5.68044	1.17041
3900	3900	123235	123.235	42.4429	41.4672	17.9525	7.0166	6.16535	2.05512
3925	3925	124029	124.029	38.4737	41.5414	18.2403	8.34018	8.34018	1.64399
3950	3950	124824	124.824	42.8915	43.4353	14.9612	8.75052	8.75052	0.836242
3975	3975	125618	125.618	41.9868	43.8972	14.4474	9.82952	8.34973	1.20824
4000	4000	126412	126.412	42.6872	45.0211	15.6278	10.1149	9.14812	0
4025	4025	127206	127.206	43.1913	42.2449	14.7645	12.2852	11.1026	2.04837
4050	4050	128000	128	43.715	44.5689	17.2427	10.7381	10.7381	1.16642
4075	4075	129224	129.224	42.2581	43.0973	15.7352	9.90496	8.22659	0
4100	4100	130449	130.449	54.4521	50.6847	17.5121	28.343	26.0896	6.43649
4125	4125	131673	131.673	52.3	48.3196	21.4492	28.8871	25.4176	8.84938
4150	4150	132898	132.898	45.302	41.122	16.281	34.2749	31.2824	6.80211
4175	4175	134122	134.122	41.1998	39.4662	15.8695	35.2744	30.8187	6.11825
4200	4200	135347	135.347	56.2493	54.2694	20.9312	28.9575	26.4038	4.65819
4225	4225	136571	136.571	53.7591	50.7648	16.943	24.0161	22.1592	5.8296
4250	4250	137796	137.796	49.1694	45.9031	15.4806	28.6018	26.4452	4.82243
4275	4275	139020	139.02	43.3463	41.4916	12.9139	31.559	28.8235	6.63561
4300	4300	140245	140.245	51.8297	44.3635	11.5925	30.4581	28.9291	5.18148
4325	4325	141469	141.469	50.1105	44.6552	13.5801	32.3635	31.1127	7.8717
4350	4350	142694	142.694	51.7258	46.3025	16.3475	32.796	29.8034	5.72834
4375	4375	143918	143.918	46.9532	44.82	14.9259	34.2683	33.5302	6.39143
4400	4400	145143	145.143	49.2798	45.4377	14.6758	33.8012	30.4005	7.52404
4425	4425	146367	146.367	51.3071	46.3348	14.7501	33.5629	30.2353	7.46792
4450	4450	147592	147.592	47.1368	43.1183	14.3104	34.6544	31.9095	10.5266
4475	4475	148816	148.816	43.0766	37.4233	12.2721	24.477	22.8217	5.65334
4500	4500	150041	150.041	40.6698	37.2636	11.7899	29.5167	27.5572	6.71527

## Sheet: Okarito
Sample depth	Sample age 14C yr BP	Sample age Cal yr BP	Sample age 14C ka BP, min	Sample age Cal ka BP, max	tropical forest	warm-temperate forest	temperate forest	savanna and dry woodland	grassland and dry shrubland	tundra
10	349.929	401.696	0.349929	0.401696	9.82504	12.3819	13.7628	9.7547	10.1415	3.65211
20	699.859	803.392	0.699859	0.803392	9.1911	12.1821	13.2729	9.18226	9.69727	2.569
30	1049.79	1205.09	1.04979	1.20509	10.4561	13.9924	15.0747	10.1624	10.1624	3.66148
40	1399.72	1606.78	1.39972	1.60678	8.97719	11.8882	12.8829	9.61367	9.61367	3.5329
50	1749.65	2008.48	1.74965	2.00848	9.27096	12.3219	13.1104	10.3375	10.3375	3.7729
60	2099.58	2410.18	2.09958	2.41018	10.2739	12.4317	13.0361	9.70799	9.97832	3.01831
70	2449.51	2811.87	2.44951	2.81187	9.15911	12.0299	12.6655	10.3933	10.7655	4.25729
80	2799.43	3213.57	2.79943	3.21357	8.95163	11.2747	12.1989	8.79249	9.03389	2.90184
90	3149.36	3615.27	3.14936	3.61527	9.86271	13.2273	13.799	10.1898	10.1898	4.71698
100	3499.29	4016.96	3.49929	4.01696	9.14701	12.8783	13.111	10.4217	10.4217	4.75308
110	3849.22	4418.66	3.84922	4.41866	9.17709	13.066	13.5407	10.45	10.45	2.85289
120	4199.15	4820.35	4.19915	4.82035	8.8612	12.967	13.4062	9.79427	9.48369	1.98761
130	4549.08	5222.05	4.54908	5.22205	9.39977	13.7613	14.3179	11.0475	10.8169	3.28312
140	4899.01	5623.75	4.89901	5.62375	9.88219	13.7036	13.7036	10.7914	10.7914	2.8
150	5248.94	6025.44	5.24894	6.02544	8.24072	12.3034	12.7106	9.49077	9.25565	2.21135
160	5598.87	6427.14	5.59887	6.42714	9.059	12.7725	13.4805	10.3179	10.3179	3.12648
170	5948.8	6828.83	5.9488	6.82883	7.63363	11.4663	12.0967	9.68115	9.68115	2.85884
180	6298.73	7230.53	6.29873	7.23053	7.30303	11.0163	11.3219	9.56243	9.77853	2.95215
190	6648.66	7632.23	6.64866	7.63223	6.89589	11.4276	11.6517	9.96316	10.1872	3.11064
200	6998.59	8033.92	6.99859	8.03392	8.81024	12.6057	13.3013	10.2725	10.6326	3.162
210	7348.52	8435.62	7.34852	8.43562
220	7698.45	8837.31	7.69845	8.83731	8.62277	11.5074	11.5074	9.39473	9.39473	3.80003
230	8048.37	9239.01	8.04837	9.23901	7.81161	9.6329	10.1104	8.56194	8.56194	2.99425
240	8398.3	9640.71	8.3983	9.64071	9.05558	12.1874	12.7222	10.6514	11.0296	3.67274
251	8783.23	10082.6	8.78323	10.0826
260	9098.16	10444.1	9.09816	10.4441	9.55005	13.8665	14.8553	11.3976	10.9333	3.65633
270	9448.09	10845.8	9.44809	10.8458
280	9798.02	11247.5	9.79802	11.2475	11.2344	14.7909	14.7909	11.4594	11.4594	2.65681
281	9833.01	11287.7	9.83301	11.2877
282	9868.01	11327.8	9.86801	11.3278	11.2047	13.657	14.1741	12.2318	12.2318	3.45048
284	10013.9	11540.5	10.0139	11.5405
286	10235.8	11885.5	10.2358	11.8855	8.1558	10.0868	10.0868	8.65537	8.65537	2.15413
288	10457.7	12230.5	10.4577	12.2305
290	10679.6	12575.5	10.6796	12.5755	9.27397	11.8738	11.8738	9.77854	9.77854	3.8894
292	10901.5	12920.5	10.9015	12.9205
294	11123.4	13265.5	11.1234	13.2655	7.19957	9.3564	10.1474	8.02924	7.81728	2.62367
296	11345.3	13610.5	11.3453	13.6105
298	11567.2	13955.5	11.5672	13.9555	7.49907	10.2701	11.2666	8.17615	8.17615	3.86671
300	11789.1	14300.5	11.7891	14.3005
302	11966.7	14547.9	11.9667	14.5479	5.85645	6.8105	7.69167	5.06939	5.369	1.85551
304	12100	14697.6	12.1	14.6976
306	12233.3	14847.4	12.2333	14.8474	6.11664	7.05378	7.59535	5.63475	5.63475	2.13396
308	12366.7	14997.1	12.3667	14.9971
310	12500	15146.8	12.5	15.1468	5.32957	6.45901	6.80652	5.19613	5.19613	2.47384
312	12633.3	15296.6	12.6333	15.2966
314	12766.7	15446.3	12.7667	15.4463	2.86234	3.0073	3.20251	2.51649	2.51649	1.27592
316	12900	15596.1	12.9	15.5961
318	13033.3	15745.8	13.0333	15.7458	2.63095	2.71907	3.30869	2.60189	2.60189	1.49837
320	13166.7	15895.6	13.1667	15.8956	3.14194	2.72548	3.35877	3.53333	3.53333	2.85791
322	13300	16045.3	13.3	16.0453	1.99667	1.87668	2.0511	2.30057	2.30057	1.9791
324	13433.3	16195.1	13.4333	16.1951	2.58925	2.31555	2.43668	2.98203	2.98203	2.58185
326	13566.7	16344.8	13.5667	16.3448	3.19793	2.80883	2.93577	3.68653	3.68653	3.03886
328	13700	16494.5	13.7	16.4945	3.18829	2.85284	3.13472	3.58047	3.37824	2.63905
330	13833.3	16644.3	13.8333	16.6443	3.60573	3.074	3.32679	4.402	4.62092	3.60294
332	13966.7	16794	13.9667	16.794	2.71334	2.31622	2.45743	3.233	3.13314	2.54461
334	14100	16943.8	14.1	16.9438	3.72291	2.99561	3.25308	4.35357	4.05627	3.5072
336	14233.3	17093.5	14.2333	17.0935	2.78617	2.3362	2.45084	3.53451	3.64915	2.97555
338	14366.7	17243.3	14.3667	17.2433	3.15	2.63919	3.02072	3.78855	3.63213	3.02731
340	14500	17393	14.5	17.393	3.26696	2.86708	3.32242	4.05945	4.05945	3.35047
342	14700	17623	14.7	17.623	3.97093	3.46945	3.62718	4.26181	4.15028	3.05984
344	14900	17853	14.9	17.853	3.76333	3.38368	3.745	4.71468	4.54435	3.69719
346	15100	18083	15.1	18.083	5.05877	3.78596	4.19003	5.78832	5.719	4.35148
348	15300	18313	15.3	18.313	5.04837	4.08394	4.30849	5.85889	5.74266	4.39615
350	15500	18543	15.5	18.543	3.89977	3.26908	3.76425	4.93956	4.80687	3.53474
352	15986.7	19106.7	15.9867	19.1067	4.43914	3.72109	4.04147	5.61315	5.66812	4.14815
354	16473.3	19670.5	16.4733	19.6705	5.49759	4.7572	4.69374	6.51653	6.51653	4.97629
355	16716.7	19952.3	16.7167	19.9523	5.18565	5.52052	5.94979	6.40091	6.40091	5.20227
358	17446.7	20797.9	17.4467	20.7979	5.18473	4.37299	5.04188	6.2435	6.2435	4.8317
360	17933.3	21361.7	17.9333	21.3617	6.47588	7.00909	7.72898	7.30093	7.58153	4.75996
363	18663.3	22207.3	18.6633	22.2073	6.72188	7.51974	7.98917	8.33019	8.33019	4.73541
365	19150	22771	19.15	22.771	8.60862	9.4605	10.3337	10.8753	10.8753	8.09357
368	19393.8	23025.2	19.3938	23.0252	8.42972	9.54966	10.0366	10.8793	11.1604	6.57413
370	19556.2	23194.8	19.5562	23.1947	11.4486	11.9337	11.6423	11.64	11.64	7.50144
373	19800	23449	19.8	23.449	9.64235	10.6011	11.3933	10.3507	10.8358	6.46119
375	20880	24709.4	20.88	24.7094	9.22588	9.8895	10.4328	11.0926	11.0926	6.35013
378	22500	26600	22.5	26.6	9.63281	11.7901	12.748	10.8672	10.8672	6.06027
380	22591.4	26692.7	22.5914	26.6927	8.072	9.52687	9.77695	10.193	10.193	5.38118
383	22728.6	26831.9	22.7286	26.8319	4.54218	4.51265	4.72098	5.71285	5.85404	3.71528
385	22820	26924.6	22.82	26.9246	8.07409	8.14722	8.28776	8.85696	8.86101	5.93555
388	22957.1	27063.7	22.9571	27.0637	9.14385	8.89414	9.73843	11.1537	11.1537	7.20427
390	23048.6	27156.5	23.0486	27.1565	8.74158	8.05967	8.64736	10.5772	10.6476	7.70103
393	23185.7	27295.6	23.1857	27.2956	7.18791	4.88764	6.06174	8.03431	8.47618	7.30576
396	23322.9	27434.7	23.3229	27.4347	7.75618	6.81	7.4019	9.39291	9.39291	7.77424
398	23414.3	27527.4	23.4143	27.5274	7.06452	5.58274	6.34671	8.1441	8.69178	7.14905
400	23505.7	27620.2	23.5057	27.6202	7.16737	7.05019	7.3523	7.8808	8.36817	5.99017
405	23734.3	27852	23.7343	27.852	9.16659	9.73654	11.0088	10.4295	10.4295	6.34579
410	23962.9	28083.9	23.9629	28.0839	6.28383	7.0337	7.65548	7.25635	7.25635	3.79626
415	25100	28874.6	25.1	28.8746	8.40703	9.58483	10.2251	9.31666	8.86394	5.25808
420	27600	30512.8	27.6	30.5128	7.88259	10.9864	12.0663	8.30391	7.8873	5.31055
425	30100	32151	30.1	32.151	5.96462	8.8729	10.1147	6.48414	6.48414	6.16345
430	32600	33789.2	32.6	33.7892	5.39665	7.67515	8.54164	6.99025	6.99025	4.73315
435	35100	35427.3	35.1	35.4273	12.1637	12.1783	13.8541	13.9774	13.9774	8.61365
440	37600	37065.5	37.6	37.0655	6.3815	11.4237	12.9994	8.23313	8.76238	6.05135
445	40100	38703.7	40.1	38.7037	2.41255	7.86686	8.43623	4.07156	4.07156	3.95104
450	42600	40341.9	42.6	40.3419	4.27951	9.83534	10.5417	4.19972	4.19972	2.41454
455	45100	41980.1	45.1	41.9801	5.54351	11.0894	12.092	7.74105	7.26845	6.24323
460	47600	43618.2	47.6	43.6182	8.35568	12.2827	13.6511	8.92548	8.92548	4.69847
465	50100	45256.4	50.1	45.2564	7.20847	12.4637	13.1217	9.11369	9.11369	5.72503
470	52600	46894.6	52.6	46.8946	8.20719	12.0892	12.4433	9.82948	10.5262	6.12925
475	55100	48532.8	55.1	48.5328	8.37397	12.6351	12.7459	9.04442	9.04442	3.44539
480	57600	50170.9	57.6	50.1709	7.50178	11.4425	12.3651	8.11722	8.11722	4.04718
485	60100	51809.1	60.1	51.8091	7.87664	11.4457	12.2098	8.27217	8.27217	3.82184
490	62600	53447.3	62.6	53.4473	8.801	11.3127	11.3127	9.05094	8.62085	4.2736
495	65100	55085.5	65.1	55.0855	9.04917	11.1628	11.1628	9.4286	9.54463	4.57895
500	67600	56723.6	67.6	56.7236	6.94017	10.7827	11.3167	8.18174	8.18174	4.52949
505	70100	58361.8	70.1	58.3618	6.77155	9.62367	10.5924	6.95012	6.51901	3.30093
510	72600	60000	72.6	60	7.25415	8.23478	8.88358	7.91244	7.91244	3.76873
515	75100	62142.9	75.1	62.1429	6.46867	8.78834	9.2608	7.46984	6.91401	4.61273
520	77600	64285.7	77.6	64.2857	6.81204	10.2164	10.5462	7.90456	7.64705	4.95254
525	80100	66428.6	80.1	66.4286	8.18378	12.1414	12.5496	9.24581	9.23529	5.82019
530	82600	68571.4	82.6	68.5714	6.69918	12.3255	13.1015	9.17805	9.17805	6.98184
535	85100	70714.3	85.1	70.7143	6.8524	11.7595	13.4222	6.77137	6.26106	4.70594
540	87600	72857.1	87.6	72.8571	9.55716	14.0365	17.3124	9.80815	9.1757	4.67064
545	90100	75000	90.1	75	9.31941	12.7131	13.9181	8.84058	8.84058	3.63679
551	93100	75214.3	93.1	75.2143	12.2	14.6582	16.3586	10.7584	11.2206	5.20579
561	98100	75571.4	98.1	75.5714	8.1841	10.591	11.4799	7.58458	7.2518	3.32041
561.1	98150	75575	98.15	75.575
600.9	118050	76996.4	118.05	76.9964
601	118100	77000	118.1	77	4.34144	5.06517	5.45831	3.84698	4.00243	1.49732
605	120100	77797	120.1	77.797	9.08247	11.1616	11.5367	8.62239	8.80996	3.55812
615	125100	79789.5	125.1	79.7895	9.92677	12.1202	13.0482	8.75094	8.75094	3.34166
625	130100	81782	130.1	81.782	9.35218	11.362	12.0594	8.17491	8.45067	2.40219
635	135100	83774.4	135.1	83.7744	11.8649	15.3962	15.882	10.6417	10.6417	2.79553
645	140100	85766.9	140.1	85.7669	6.79342	8.0393	8.71886	5.87251	5.93711	1.42659
655	145100	87759.4	145.1	87.7594	7.2285	8.56571	8.99378	5.75053	5.75053	2.28246
665	150100	89751.9	150.1	89.7519	6.88425	8.39202	8.90663	5.8995	5.73676	2.35342
675	155100	91744.4	155.1	91.7444	7.4051	8.93964	9.13507	6.57457	6.57457	2.1837
682.5	158850	93238.7	158.85	93.2387	6.08651	8.00274	8.26292	5.75657	5.75657	2.44789
701	168100	96924.8	168.1	96.9248	8.0656	10.0899	10.3773	7.24703	7.24703	2.9381
705	170100	97721.8	170.1	97.7218	5.22817	6.94425	7.38786	4.98622	5.1233	2.06367
715	175100	99714.3	175.1	99.7143	5.30974	6.7364	7.12214	4.88114	4.93192	1.62242
725	180100	101707	180.1	101.707	6.61657	8.05035	8.48909	5.47379	5.68062	2.0202
735	185100	103699	185.1	103.699	8.62451	11.417	12.1708	7.5421	7.5421	2.35784
745	190100	105692	190.1	105.692	10.623	14.5532	15.3606	9.72588	9.72588	3.23683
755	195100	107684	195.1	107.684	11.4657	14.8983	15.5239	9.81628	9.57983	2.56267
765	200100	109677	200.1	109.677	10.296	13.1525	13.9267	8.58825	8.87161	2.4496
775	205100	111669	205.1	111.669	9.28172	11.6485	12.436	7.20201	7.20201	2.54492
782	208600	113064	208.6	113.064	9.70051	12.0822	12.0822	8.46925	8.6577	3.01408
801	218100	116850	218.1	116.85	7.1986	9.05225	9.49384	6.4522	6.4522	2.50912
805	220100	117647	220.1	117.647	9.70051	12.0822	12.0822	8.46925	8.6577	3.01408
815	225100	119639	225.1	119.639	12.8358	17.2194	16.9035	10.6404	10.6404	2.96909
825	230100	121632	230.1	121.632	11.6681	14.658	14.9077	9.32551	9.32551	3.13038
835	235100	123624	235.1	123.624	10.8488	13.9407	14.6975	8.4988	8.4988	1.91473
845	240100	125617	240.1	125.617	10.2461	13.7555	14.4659	8.17446	8.17446	1.96104
850	242600	126613	242.6	126.613	8.41332	11.2488	11.5317	6.66273	6.66273	1.90331
855	245100	127609	245.1	127.609	11.4629	15.9719	17.1885	9.56292	9.68399	2.16728
860	247600	128605	247.6	128.605	9.89698	13.3351	13.3353	6.88063	6.60564	2.50945
865	250100	129602	250.1	129.601	6.01188	8.38073	8.54424	4.65721	4.82071	1.76871
875	255100	131594	255.1	131.594	5.3567	5.33483	5.59722	5.63398	5.63398	4.42041
885	260100	133586	260.1	133.586	2.20103	2.11086	2.46927	2.74754	2.74754	1.99628
901	268100	136774	268.1	136.774	2.41872	2.43807	3.0186	2.68436	2.75528	1.83852
905	270100	137571	270.1	137.571	1.74841	1.70066	2.44318	2.17727	2.31168	1.38484
915	275100	139564	275.1	139.564	4.51546	5.36256	7.28113	5.10557	5.21864	2.96153
925	280100	141556	280.1	141.556	6.04984	6.49153	8.53762	6.01902	6.01902	2.93251
935	285100	143549	285.1	143.549	5.78362	6.40666	9.47157	6.67777	6.91565	3.86802
939	287100	144346	287.1	144.346	1.70357	1.63189	2.84029	2.05179	2.09045	1.66901
940	287600	144545	287.6	144.545	1.7323	1.97622	2.809	2.53796	2.59278	2.03069
941	288100	144744	288.1	144.744	2.18786	2.35688	3.40052	3.03584	3.2044	2.44564
941.5	288350	144844	288.35	144.844	2.40266	2.57491	3.3625	2.89577	3.04728	2.10426
943	289100	145143	289.1	145.143	5.50474	7.20964	10.5751	7.80276	7.80276	5.70885
945	290100	145541	290.1	145.541	6.22559	8.21174	11.8253	8.84375	9.16319	7.38371
955	295100	147534	295.1	147.534	4.9632	5.96132	9.93989	6.48293	6.17956	5.30545
962.5	298850	149028	298.85	149.028	8.78296	10.7893	14.8561	8.29787	8.29787	5.03406
965	300100	149526	300.1	149.526	6.58303	9.42077	12.4264	9.38331	9.10985	6.41453
968	301600	150124	301.6	150.124	6.77867	8.44687	11.8168	8.67452	8.97123	6.55928

## Sheet: NPK99
Sample	Age (ka)	tropical forest	warm-temperate forest	temperate forest	savanna and dry woodland	grassland and dry shrubland	tundra
0	0	21.958	14.3867	3.85503	12.3154	12.3154	8.92426
5	0.8325	22.2905	15.1488	3.57144	13.4897	13.9192	9.31082
10	1.665	22.6193	14.7845	6.15136	13.9518	13.6669	9.58805
15	2.4975	20.0253	14.077	5.24177	12.5348	11.886	8.54662
20	3.33	22.9606	15.4684	6.09969	13.3992	12.3474	8.24021
25	4.1625	26.1794	17.7553	5.32426	12.7216	12.9202	8.35625
30	4.995	18.7472	10.0749	1.7985	12.5911	12.5911	10.6347
35	5.8275	26.4395	18.9373	5.25443	11.8353	11.8353	8.20982
40	6.66	23.4371	15.8092	4.24121	11.5722	11.5722	8.06168
45	7.4925	20.9809	13.8215	4.29863	14.5911	14.5911	9.24858
46	7.659	20.8424	13.3231	4.00452	14.3136	14.0063	9.71601
47	7.8255	22.0199	15.2309	4.19689	17.1423	16.823	11.8107
48	7.992	17.1874	11.2306	2.48732	14.64	14.4101	11.1404
49	8.1585	16.0617	9.28011	2.48104	14.0713	13.9589	10.1109
50	8.325	14.1102	9.57968	1.26185	12.4727	12.4727	10.4145
51	8.4915	14.157	10.5048	1.76986	13.0034	13.2572	9.96826
52	8.658	16.2007	10.6788	1.91581	12.3934	12.3934	7.39444
53	8.8245	16.9749	10.7549	3.50672	10.8249	10.5083	6.85306
54	8.991	14.7543	8.70114	1.53705	12.6973	12.6973	7.41584
55	9.1575	16.2784	8.36668	1.63866	12.2345	12.2345	8.56923
56	9.324	14.6614	7.5089	1.9976	11.7783	11.6957	8.12309
57	9.4905	13.765	8.74133	2.26184	11.4938	11.4938	7.15173
58	9.657	12.4598	6.30947	1.57718	10.2569	10.2569	8.25377
59	9.8235	13.6814	7.65612	1.86388	11.2039	11.2039	7.88913
60	9.99	14.161	7.56568	1.31853	12.1131	12.1131	7.97704
61	10.1565	16.2844	9.15345	1.53651	12.5283	12.5283	8.00522
62	10.323	17.83	11.4533	2.3214	13.1285	13.1285	6.77196
63	10.4895	15.2903	8.3663	1.72224	13.3248	13.3248	7.54182
64	10.656	18.8912	12.4875	2.45254	15.1457	15.1457	7.8676
65	10.8225	18.7219	11.4801	2.70653	14.5774	14.1439	8.28849
70	11.655	16.1801	8.07127	1.35147	13.3233	13.3233	9.05072
75	12.4875	15.67	7.64058	2.51515	12.5646	12.1331	8.63971
80	13.32	18.0441	9.83534	2.94585	12.5389	12.5389	8.37218
85	14.1525	18.2388	10.1476	3.78112	14.2455	13.8662	9.28465
90	14.985	17.6124	9.43139	3.13673	12.9012	12.9012	8.34215
95	15.8175	15.24	7.73937	1.37786	12.0665	11.6629	7.66778
100	16.65	20.331	12.9531	3.31799	13.0602	12.5639	7.37791
105	17.4825	18.6155	10.6941	3.3089	14.1638	14.1638	8.20134
110	18.315	19.5748	11.5184	4.8113	14.8531	14.4404	9.22386
115	19.1475	15.9643	7.54126	2.60047	13.5547	13.1637	9.97472
120	19.98	16.7974	8.81076	1.90602	13.7998	13.7998	9.03425
125	20.8125	16.179	8.49698	2.79869	13.5285	13.1369	8.75199
130	21.645	16.2589	8.06073	1.99211	13.4446	12.9933	8.19816
135	22.4775	19.6207	12.5516	3.02952	14.2112	14.2112	6.57616
140	23.31	18.1993	12.2249	3.48372	14.4799	13.9367	7.60376
145	24.1425	18.6093	12.3305	3.27893	14.8737	14.4149	8.57298
150	24.975	18.8851	10.6899	1.40522	12.3948	12.3948	7.6808
155	25.8075	19.8043	12.0124	2.85354	14.6435	14.1164	8.31892
160	26.64	17.615	9.99843	1.09109	13.1622	13.1622	7.07107
165	27.4725	19.2596	11.5495	2.0514	13.685	13.685	7.10926
170	28.305	16.0999	9.32975	1.61823	14.2383	13.8338	8.62535
175	29.1375	14.3783	7.4097	0.488532	12.2046	12.2046	7.45712
180	29.97	11.5376	5.58728	0.981077	10.1818	10.1818	6.62826
185	30.8025	15.0932	8.93683	2.05358	13.483	13.483	7.97624
190	31.635	15.3317	10.9195	3.31889	13.9292	13.9292	8.85445
195	32.4675	17.2752	9.9516	2.02328	15.3686	14.941	8.66887
200	33.3	16.6433	9.67386	1.79244	13.328	13.328	7.86566
205	34.1325	16.279	10.648	2.88579	14.602	14.602	7.22999
210	34.965	15.1717	8.20894	0.66519	13.3074	13.3074	7.62796
215	35.7975	14.6014	7.89759	1.50888	12.7313	12.7313	7.77072
220	36.63	15.9288	9.38472	0.97474	13.0817	13.0817	8.00615
225	37.4625	16.4918	9.34666	1.75145	12.7354	13.2484	8.17109
230	38.295	15.835	7.17843	1.16335	12.0341	12.0341	8.88369
