# Supplementary material for: Terrestrial biosphere changes over the last 120 kyr
Source: Copernicus journal article supplement (doi:10.5194/cp-12-51-2016), 2016-01-18
Supplement: Supplementary file 1 [file cp-12-51-2016-supplement.zip › supplement/Australasia/Baikal_scores_Tarasovetal.xls]

## Sheet: MEGA SCORES
Sample	Depth in mm	Depth1 = Depth (orig. sample depth)	Chron1 (ka BP)	tundra	boreal forest	temperate forest	warm temperate forest	desert	grassland and dry shurbland
15	6080	6080	114.845	11.992	9.2848	9.2848	6.33875	8.79324	17.6815
16	6105	6105	115.472	10.6435	9.96918	10.7064	6.67077	9.27419	17.6359
17	6130	6130	116.1	8.0473	10.5321	10.5321	3.94275	9.01072	16.2474
18	6155	6155	116.727	10.2209	12.7442	12.7442	6.35743	7.79592	18.2048
19	6180	6180	117.308	10.3729	13.8726	13.8726	5.05338	10.4117	17.2061
20	6205	6205	117.541	10.4286	17.1119	17.1119	7.34416	7.62998	13.712
21	6230	6230	117.773	7.36285	19.4877	19.4877	7.26446	4.66084	9.10695
22	6255	6255	118.006	8.33507	18.4675	18.851	7.14421	6.81704	10.9293
23	6280	6280	118.238	7.00036	19.9414	19.9414	6.91822	5.59008	9.97462
24	6305	6305	118.471	8.2166	19.8715	19.8715	7.12325	6.73833	9.38561
25	6330	6330	118.703
26	6355	6355	118.936	6.39183	19.9275	19.9275	7.81135	4.60758	6.9836
27	6380	6380	119.168
28	6405	6405	119.401	7.56997	19.5909	19.5909	7.39488	5.09079	8.94432
29	6430	6430	119.633
30	6455	6455	119.866	6.65342	20.8716	20.8716	7.27873	4.68613	6.22982
31	6480	6480	120.098
32	6505	6505	120.331	6.26164	20.5257	20.8502	9.4283	3.79054	6.02477
33	6530	6530	120.653
34	6555	6555	120.98	7.49623	21.4297	21.4297	7.95801	4.48336	6.06661
35	6580	6580	121.308
36	6605	6605	121.635	6.28621	21.5383	21.5383	8.67229	4.96527	5.91657
37	6630	6630	121.963
38	6655	6655	122.291	6.25721	20.3046	20.3046	7.69024	4.08668	6.11269
39	6670	6670	122.487
40	6680	6680	122.618	6.48632	21.8619	21.8619	9.16971	4.1457	6.41112
41	6690	6690	122.749
42	6705	6705	122.946	7.01598	22.2238	22.2238	9.98328	3.04716	5.7232
43	6710	6710	123.011
44	6720	6720	123.142	5.59814	21.6291	21.6291	8.23808	4.46967	6.39119
45	6730	6730	123.274
46	6740	6740	123.405	5.78545	21.5374	21.5374	7.81784	2.63713	5.53705
47	6755	6755	123.601
48	6760	6760	123.667	5.6599	23.747	23.747	8.6284	3.99312	5.80231
49	6770	6770	123.798
50	6780	6780	123.893	7.40608	23.0095	23.0095	7.0294	5.07813	8.64574
51	6790	6790	123.985
52	6805	6805	124.122	10.0146	20.4397	20.4397	6.51318	5.00689	8.27294
53	6810	6810	124.167
54	6820	6820	124.259	5.8848	23.6186	23.6186	6.5888	3.31585	5.74847
55	6830	6830	124.35
56	6840	6840	124.441	5.13486	24.0424	24.0424	5.8375	4.64619	5.9787
57	6855	6855	124.578
58	6860	6860	124.624	6.70499	23.2881	23.2881	5.99343	5.11184	8.0012
59	6870	6870	124.715
60	6880	6880	124.806
61	6890	6890	124.898	6.67229	24.1851	24.1851	5.92185	3.91843	6.7236
62	6905	6905	125.034
63	6910	6910	125.08
64	6920	6920	125.171	7.99072	22.4233	22.4233	4.81917	5.0531	7.89981
65	6930	6930	125.263
66	6940	6940	125.354
67	6955	6955	125.491	7.87217	21.1971	21.1971	5.09684	5.25157	8.51483
68	6960	6960	125.537
69	6970	6970	125.628
70	6980	6980	125.719	9.97416	20.3181	20.3181	5.04656	4.52045	8.00463
71	6990	6990	125.81
72	7005	7005	125.947
73	7010	7010	125.993	6.92521	20.1829	20.1829	4.25264	6.24433	8.38925
74	7020	7020	126.084
75	7030	7030	126.176
76	7040	7040	126.267	7.60925	19.5984	19.5984	3.45484	5.83585	8.92257
77	7055	7055	126.404
78	7060	7060	126.449	8.5416	18.8107	18.8107	3.1361	5.55673	8.07903
79	7070	7070	126.541	8.41213	16.9651	17.5136	3.03901	6.4794	8.6883
80	7080	7080	126.632	9.82589	17.097	17.097	3.30098	5.5493	8.50364
81	7090	7090	126.723	9.47008	17.3501	17.6754	3.81932	5.0315	7.76864
82	7105	7105	126.863	9.01524	16.8256	16.8256	3.96843	5.81424	8.15633
83	7110	7110	126.97	8.89535	16.0823	16.0823	2.96339	4.7333	6.3296
84	7125	7125	127.291	7.90149	15.7414	15.7414	2.84636	5.00509	8.57348
85	7130	7130	127.398	9.01998	16.5497	16.5497	2.73916	3.91193	6.55509
86	7140	7140	127.611	9.32208	16.0757	16.0757	3.11635	3.44747	6.91377
87	7150	7150	127.825
88	7155	7155	127.932	8.76762	14.1024	14.1024	2.02997	3.91856	7.8483
89	7160	7160	128.039
90	7170	7170	128.253	8.47158	9.79235	9.79235	1.62155	3.50487	6.22177
91	7180	7180	128.466	8.17361	11.2804	11.2804	2.02678	3.20322	5.92066
92	7190	7190	128.68	9.17795	8.85983	8.85983	1.94053	4.19773	6.93528
93	7200	7200	128.894	7.70662	11.0847	11.0847	2.43307	2.74318	4.85719
94	7205	7205	129.001	7.32253	7.1594	7.1594	2.22724	3.53857	5.95839
95	7210	7210	129.108	8.09706	7.50749	7.50749	2.153	4.15251	8.18494
96	7225	7225	129.428	8.38877	7.31524	7.31524	2.13912	3.63999	6.77844
97	7230	7230	129.535	7.42551	7.76283	7.76283	2.27174	3.06297	6.73278
98	7240	7240	129.749	7.2345	5.46743	5.46743	0.967868	3.65298	7.11712
99	7255	7255	130.069	8.60868	6.32647	6.32647	1.64597	5.98036	11.5622
