# Supplementary material for: Terrestrial biosphere changes over the last 120 kyr
Source: Copernicus journal article supplement (doi:10.5194/cp-12-51-2016), 2016-01-18
Supplement: Supplementary file 1 [file cp-12-51-2016-supplement.zip › supplement/Australasia/BiomizationPickettetal2004.xls]

## Sheet: CALFEN
																												Biome												MEGABIOMES
	Taxa	Tropical drought-deciduous malacophyll broad-leaved tree	Tropical evergreen malacophyll broad-leaved tree	Cool-temperate evergreen broad-leaved tree	Warm-temperate evergreen broad-leaved rain forest tree	Ubiquitous warm-temperate evergreen broad-leaved tree	Drought-tolerant warm-temperate evergreen broad-leaved tree	Evergreen sclerophyll broad-leaved tree	Temperate cold-deciduous broad-leaved tree	Cool-temperate evergreen needle-leaved tree	Intermediate-temperate evergreen needle-leaved tree	Tropical evergreen broad-leaved low or high shrub	Temperate malacophyll broad-leaved low of high shrub	Cool-temperate sclerophyll broad-leaved low or high shrub	Warm-temperate sclerophyll broad-leaved low or high shrub	Arctic dwarf shrub	Heath	Tropical drought-intolerant forb	Temperate drought-intolerant forb	Eurythermic drought-tolerant forb	Arctic forb	Sedge graminoid	Grass graminoid	Tree fern	Eurythermic fern or fern ally			Tropical evergreen broadleaf forest	Tropical semi-evergreen broadleaf forest	Tropical deciduous broadleaf forest and woodland	Warm-temperate rain forest	Cool evergreen needleleaf forest	Cool-temperate rain forest	Wet sclerophyll forest	Temperate or tropical grassland and xerophytic shrubland	Xerophytic woods/scrub	Temperate sclerophyll woodland and shrubland	Tundra			tropical forest	warm-temperate forest	temperate forest	boreal forest	savanna and dry woodland	grassland and dry shrubland	desert	dry tundra	tundra
Acacia\i	Acacia		1	1		1		1						1	1		1			1								1	1	1	1	1	1	1	1	1	1	0			1	1	1		1	1			0
Acaena\i	Acaena																		1		1							0	0	0	1	1	1	0	0	1	1	1			0	1	1		1	1			1
Aciphylla\i	Aciphylla																				1							0	0	0	0	0	0	0	0	0	0	1			0	0	0		0	0			1
Algal/Fungal																																									0	0	0		0	0			0
Amperea\i	Euphorbiaceae		1			1											1			1								1	1	1	1	0	0	1	1	1	1	0			1	1	0		1	1			0
Amyema\i	Loranthaceae							1							1													0	1	1	1	0	0	1	0	1	1	0			1	1	0		1	1			0
Anthoceros\i																																									0	0	0		0	0			0
APIACEAE	Apiaceae																1	1	1		1							1	1	1	1	1	1	1	0	1	1	1			1	1	1		1	1			1
Aristolochia\i type	Aristolochiaceae																																								0	0	0		0	0			0
Asperula\i	Asperula																		1									0	0	0	1	1	1	0	0	1	1	0			0	1	1		1	1			0
Astelia\i	Astelia																				1							0	0	0	0	0	0	0	0	0	0	1			0	0	0		0	0			1
ASTERACEAE-liguliflorae	Asteraceae-Liguliflorae																		1	1	1							0	0	0	1	1	1	0	1	1	1	1			0	1	1		1	1			1
ASTERACEAE-spineless	Asteraceae															1	1			1	1							0	0	0	0	0	0	0	1	1	1	1			0	0	0		1	1			1
ASTERACEAE-tubuliflorae	Asteraceae-Tubuliflorae															1	1			1	1							0	0	0	0	0	0	0	1	1	1	1			0	0	0		1	1			1
Atherosperma\i	Atherosperma			1																								0	0	0	0	1	1	0	0	0	0	0			0	0	1		0	0			0
Azolla\i																																									0	0	0		0	0			0
Baltispaeridium\i?																																									0	0	0		0	0			0
Banksia\i	Banksia							1						1	1													0	1	1	1	1	1	1	0	1	1	0			1	1	1		1	1			0
Billardiera\i	Pittosporaceae		1	1		1																						1	1	1	1	1	1	1	0	0	0	0			1	1	1		0	0			0
BORAGINACEAE	Boraginaceae																		1		1							0	0	0	1	1	1	0	0	1	1	1			0	1	1		1	1			1
Botryococcus\i																																									0	0	0		0	0			0
BRASSICACEAE	Brassicaceae																				1							0	0	0	0	0	0	0	0	0	0	1			0	0	0		0	0			1
Bursaria\i	Bursaria							1																				0	0	1	1	0	0	1	0	0	1	0			1	1	0		1	0			0
C3 60 micron																																									0	0	0		0	0			0
Callitris\i	Callitris										1																	1	1	0	1	0	0	1	0	1	1	0			1	1	0		1	1			0
CAMPANULACEAE	Campanulaceae																	1	1	1								1	1	1	1	1	1	1	1	1	1	0			1	1	1		1	1			0
Cardamine\i	Brassicaceae																				1							0	0	0	0	0	0	0	0	0	0	1			0	0	0		0	0			1
CARYOPHYLLACEAE	Caryophyllaceae																		1		1							0	0	0	1	1	1	0	0	1	1	1			0	1	1		1	1			1
Casuarina\i	Casuarina						1	1									1											0	0	1	1	0	0	1	0	1	1	0			1	1	0		1	1			0
Centaurium\i	Gentianaceae																				1							0	0	0	0	0	0	0	0	0	0	1			0	0	0		0	0			1
CHENOPODIACEAE	Chenopodiaceae																			1								0	0	0	0	0	0	0	1	1	0	0			0	0	0		0	1			0
Circulisporites\i																																									0	0	0		0	0			0
Closterium\i																																									0	0	0		0	0			0
CONVOLVULACEAE	Convolvulaceae																	1	1									1	1	1	1	1	1	1	0	1	1	0			1	1	1		1	1			0
Coprosma\i	Coprosma													1	1						1							0	1	1	1	1	1	1	0	1	1	1			1	1	1		1	1			1
Correa\i	Correa													1			1											0	0	0	0	1	1	1	0	1	1	0			0	1	1		1	1			0
CP3 60 micon																																									0	0	0		0	0			0
CP3 reticu																																									0	0	0		0	0			0
Culcita/Pteris\i	Culcita																								1			0	0	0	0	0	0	0	0	0	0	0			0	0	0		0	0			0
CUNONIACEAE	Cunoniaceae		1									1																1	1	1	1	0	1	0	0	0	0	0			1	1	1		0	0			0
Cyathea\i	Cyathea																							1				0	0	0	1	0	1	1	0	0	0	0			0	1	1		0	0			0
CYPERACEAE																																									0	0	0		0	0			0
Dacrycarpus\i	Dacrycarpus									1	1																	1	1	0	1	1	1	1	0	1	1	0			1	1	1		1	1			0
Dacrydium\i	Dacrydium									1	1																	1	1	0	1	1	1	1	0	1	1	0			1	1	1		1	1			0
Daviesia\i	Daviesia			1				1						1	1													0	1	1	1	1	1	1	0	1	1	0			1	1	1		1	1			0
Dicksonia\i	Dicksonia																							1				0	0	0	1	0	1	1	0	0	0	0			0	1	1		0	0			0
Dodonaea\i	Dodonaea			1				1				1			1					1								1	1	1	1	1	1	1	1	1	1	0			1	1	1		1	1			0
Drosera\	Drosera																		1									0	0	0	1	1	1	0	0	1	1	0			0	1	1		1	1			0
Echium\i	Boraginaceae																		1		1							0	0	0	1	1	1	0	0	1	1	1			0	1	1		1	1			1
Elodea\i																																									0	0	0		0	0			0
EPACRIDACEAE	Epacridaceae					1								1		1	1											0	0	1	1	1	1	1	0	1	1	1			1	1	1		1	1			1
Epilobium\i	Epilobium																		1		1							0	0	0	1	1	1	0	0	1	1	1			0	1	1		1	1			1
Eremophila\i	Eremophila																			1								0	0	0	0	0	0	0	1	1	0	0			0	0	0		0	1			0
Eriostemon\i	Eriostemon													1	1	1	1											0	1	1	1	1	1	1	0	1	1	1			1	1	1		1	1			1
Eucalyptus spathulata\i	Eucalyptus			1		1		1																				0	0	1	1	1	1	1	0	0	1	0			1	1	1		1	0			0
Eucalyptus\i	Eucalyptus			1		1		1																				0	0	1	1	1	1	1	0	0	1	0			1	1	1		1	0			0
EUPHORBIACEAE	Euphorbiaceae		1			1											1			1								1	1	1	1	0	0	1	1	1	1	0			1	1	0		1	1			0
EUPHORBIACEAE \iSauropus\i type	Euphorbiaceae		1			1											1			1								1	1	1	1	0	0	1	1	1	1	0			1	1	0		1	1			0
Euphrasia\i	Euphrasia																		1		1							0	0	0	1	1	1	0	0	1	1	1			0	1	1		1	1			1
FABACEAE																																									0	0	0		0	0			0
Galium\i	Galium																		1		1							0	0	0	1	1	1	0	0	1	1	1			0	1	1		1	1			1
Gentian\i	Gentiana																		1		1							0	0	0	1	1	1	0	0	1	1	1			0	1	1		1	1			1
GERANIACEAE	Geraniaceae																		1									0	0	0	1	1	1	0	0	1	1	0			0	1	1		1	1			0
Gleichenia\i	Gleichenia																								1			0	0	0	0	0	0	0	0	0	0	0			0	0	0		0	0			0
Gonocarpus\i	Haloragis/Gonocarpus																1		1									0	0	0	1	1	1	0	0	1	1	0			0	1	1		1	1			0
GOODENIACEAE	Goodeniaceae											1		1	1	1		1	1	1	1							1	1	1	1	1	1	1	1	1	1	1			1	1	1		1	1			1
Grammitis\i	Grammitis																								1			0	0	0	0	0	0	0	0	0	0	0			0	0	0		0	0			0
Grevillea\i	Grevillea						1	1						1	1		1			1								0	1	1	1	1	1	1	1	1	1	0			1	1	1		1	1			0
Gymnosperm \i'Araucauria'\i type	Gymnospermae									1	1																	1	1	0	1	1	1	1	0	1	1	0			1	1	1		1	1			0
Gymnosperm undetermined	Gymnospermae									1	1																	1	1	0	1	1	1	1	0	1	1	0			1	1	1		1	1			0
GYROSTEMONACEAE	Gyrostemonaceae						1	1							1					1								0	1	1	1	0	0	1	1	1	1	0			1	1	0		1	1			0
Haloragodendron\ Glischrocaryon\i	Haloragodendron														1													0	1	1	1	0	0	1	0	1	1	0			1	1	0		1	1			0
HEPATICAE																																									0	0	0		0	0			0
Hibbertia\i	Hibbertia		1										1	1	1		1											1	1	1	1	1	1	1	0	1	1	0			1	1	1		1	1			0
Histiopteris\i	Histiopteris																								1			0	0	0	0	0	0	0	0	0	0	0			0	0	0		0	0			0
Hydrocotyle\i	Apiaceae																1	1	1		1							1	1	1	1	1	1	1	0	1	1	1			1	1	1		1	1			1
Isoetes\i																																									0	0	0		0	0			0
LAMIACEAE	Lamiaceae											1		1		1			1	1								1	1	1	1	1	1	1	1	1	1	1			1	1	1		1	1			1
LAMIACEAE \iProstanthera\i sim	Prostanthera													1		1												0	0	0	0	1	1	1	0	0	1	1			0	1	1		1	0			1
Lemna\i																																									0	0	0		0	0			0
Leptospermum lanigerum\i	Leptospermum													1			1											0	0	0	0	1	1	1	0	1	1	0			0	1	1		1	1			0
Leucopogon\i	Leucopogon						1							1		1	1											0	0	0	0	1	1	1	0	1	1	1			0	1	1		1	1			1
LILIACEAE	Liliaceae																	1	1									1	1	1	1	1	1	1	0	1	1	0			1	1	1		1	1			0
LILIACEAE-ragged colpus	Liliaceae																	1	1									1	1	1	1	1	1	1	0	1	1	0			1	1	1		1	1			0
Lomandra\i	Lomandra																1		1									0	0	0	1	1	1	0	0	1	1	0			0	1	1		1	1			0
Lomatia\i	Lomatia													1		1	1											0	0	0	0	1	1	1	0	1	1	1			0	1	1		1	1			1
Lycopodium australianum\i	Lycopodium																								1			0	0	0	0	0	0	0	0	0	0	0			0	0	0		0	0			0
Lycopodium deuterodensum\i	Lycopodium																								1			0	0	0	0	0	0	0	0	0	0	0			0	0	0		0	0			0
Lycopodium fastigiatum\i	Lycopodium																								1			0	0	0	0	0	0	0	0	0	0	0			0	0	0		0	0			0
Lycopodium scariosum\i	Lycopodium																								1			0	0	0	0	0	0	0	0	0	0	0			0	0	0		0	0			0
MALVACEAE	Malvaceae						1					1								1								1	1	1	1	0	1	0	1	1	1	0			1	1	1		1	1			0
Micrantheum\i	Euphorbiaceae		1			1											1			1								1	1	1	1	0	0	1	1	1	1	0			1	1	0		1	1			0
Microsorum\i	Polypodiaceae																								1			0	0	0	0	0	0	0	0	0	0	0			0	0	0		0	0			0
Microstrobos\i	Microstrobos									1																		0	0	0	0	1	1	1	0	0	0	0			0	1	1		0	0			0
Microthyrium\i																																									0	0	0		0	0			0
Monocolpate? scabrate/reticulate																																									0	0	0		0	0			0
Monolete pattern																																									0	0	0		0	0			0
Monolete psilate																																									0	0	0		0	0			0
Monotoca\i	Monotoca													1			1											0	0	0	0	1	1	1	0	1	1	0			0	1	1		1	1			0
Montia\i																																									0	0	0		0	0			0
Muehlenbeckia\i	Muehlenbeckia												1															1	1	0	1	1	1	1	0	0	1	0			1	1	1		1	0			0
MYOPORACEAE	Myoporaceae				1															1								0	0	1	1	0	0	0	1	1	0	0			1	1	0		0	1			0
Myriophyllum\i																																									0	0	0		0	0			0
Myrtaceous shrub																																									0	0	0		0	0			0
Nertera\i	Rubiaceae				1										1	1												0	1	1	1	0	0	1	0	1	1	1			1	1	0		1	1			1
Nothofagus cunninghamii\i	Nothofagus			1																								0	0	0	0	1	1	0	0	0	0	0			0	0	1		0	0			0
Nothofagus\i brassii type	Nothofagus brassii				1																							0	0	1	1	0	0	0	0	0	0	0			1	1	0		0	0			0
Nothofagus\i eroded																																									0	0	0		0	0			0
Notolaea\i	Oleaceae	1	1																									1	1	1	1	0	0	0	0	0	0	0			1	1	0		0	0			0
Ophioglossum\i	Ophioglossum																	1										1	1	1	1	0	0	1	0	0	0	0			1	1	0		0	0			0
Oreomyrrhis\i	Apiaceae																1	1	1		1							1	1	1	1	1	1	1	0	1	1	1			1	1	1		1	1			1
Orites\i	Orites													1		1	1											0	0	0	0	1	1	1	0	1	1	1			0	1	1		1	1			1
OXALIDACEAE																																									0	0	0		0	0			0
Pediastrum\i																																									0	0	0		0	0			0
Phebalium\i	Phebalium															1												0	0	0	0	0	0	0	0	0	0	1			0	0	0		0	0			1
Phyllocladus\i	Phyllocladus									1																		0	0	0	0	1	1	1	0	0	0	0			0	1	1		0	0			0
Phyllocladus\i aberrant	Phyllocladus									1																		0	0	0	0	1	1	1	0	0	0	0			0	1	1		0	0			0
Pimelea\i	Pimelea													1	1		1			1								0	1	1	1	1	1	1	1	1	1	0			1	1	1		1	1			0
Pinus\i	Pinus										1																	1	1	0	1	0	0	1	0	1	1	0			1	1	0		1	1			0
PITTOSPORACEAE	Pittosporaceae		1	1		1																						1	1	1	1	1	1	1	0	0	0	0			1	1	1		0	0			0
Plantago\i introduced																																									0	0	0		0	0			0
Plantago\i native	Plantago																		1		1							0	0	0	1	1	1	0	0	1	1	1			0	1	1		1	1			1
POACEAE	Poaceae																						1					0	0	1	0	0	0	0	1	1	1	1			1	0	0		1	1			1
PODOCARPACEAE	Podocarpaceae									1	1																	1	1	0	1	1	1	1	0	1	1	0			1	1	1		1	1			0
Podocarpus\i	Podocarpus									1	1																	1	1	0	1	1	1	1	0	1	1	0			1	1	1		1	1			0
Polygonum\i	Polygonaceae																		1									0	0	0	1	1	1	0	0	1	1	0			0	1	1		1	1			0
Polyscias\i	Polyscias		1	1	1							1																1	1	1	1	1	1	0	0	0	0	0			1	1	1		0	0			0
Polystichum\i	Polystichum																								1			0	0	0	0	0	0	0	0	0	0	0			0	0	0		0	0			0
Pomaderris\i	Pomaderris			1		1							1															1	1	1	1	1	1	1	0	0	1	0			1	1	1		1	0			0
Poranthera\i	Poranthera													1														0	0	0	0	1	1	1	0	0	1	0			0	1	1		1	0			0
PORTULACACEAE	Portulaceae				1							1			1													1	1	1	1	0	1	1	0	1	1	0			1	1	1		1	1			0
Pratia\i	Campanulaceae																	1	1	1								1	1	1	1	1	1	1	1	1	1	0			1	1	1		1	1			0
Prostanthera\i	Prostanthera													1		1												0	0	0	0	1	1	1	0	0	1	1			0	1	1		1	0			1
PROTEACEAE	Proteaceae		1				1	1					1		1	1	1			1								1	1	1	1	1	1	1	1	1	1	1			1	1	1		1	1			1
Pteridium\i	Pteridium																								1			0	0	0	0	0	0	0	0	0	0	0			0	0	0		0	0			0
RANUNCULACEAE	Ranunculaceae																				1							0	0	0	0	0	0	0	0	0	0	1			0	0	0		0	0			1
RESTIONACEAE	Restionaceae																				1							0	0	0	0	0	0	0	0	0	0	1			0	0	0		0	0			1
RHAMNACEAE	Rhamnaceae		1			1								1	1		1											1	1	1	1	1	1	1	0	1	1	0			1	1	1		1	1			0
Riccia\i																																									0	0	0		0	0			0
ROSACEAE	Rosaceae														1													0	1	1	1	0	0	1	0	1	1	0			1	1	0		1	1			0
Rumex\i	Rumex																		1									0	0	0	1	1	1	0	0	1	1	0			0	1	1		1	1			0
RUTACEAE	Rutaceae												1	1	1	1	1											1	1	1	1	1	1	1	0	1	1	1			1	1	1		1	1			1
Sambucus\i	Sambucus	1																										0	1	1	1	0	0	0	0	0	0	0			1	1	0		0	0			0
SCROPHULARIACEAE	Scrophulariaceae																				1							0	0	0	0	0	0	0	0	0	0	1			0	0	0		0	0			1
Selaginella\i	Selaginella																								1			0	0	0	0	0	0	0	0	0	0	0			0	0	0		0	0			0
Sphagnum\i																																									0	0	0		0	0			0
Spirogyra\i																																									0	0	0		0	0			0
SPORES undetermined																																									0	0	0		0	0			0
Spyridium\i	Rhamnaceae		1			1								1	1		1											1	1	1	1	1	1	1	0	1	1	0			1	1	1		1	1			0
Stylidium\i	Stylidium																		1									0	0	0	1	1	1	0	0	1	1	0			0	1	1		1	1			0
Tasmannia\i	Tasmannia			1		1								1														0	0	1	1	1	1	1	0	0	1	0			1	1	1		1	0			0
Todea\i	Todea																								1			0	0	0	0	0	0	0	0	0	0	0			0	0	0		0	0			0
Trachymene\i	Apiaceae																1	1	1		1							1	1	1	1	1	1	1	0	1	1	1			1	1	1		1	1			1
Triglochin\i type																																									0	0	0		0	0			0
Typha\i																																									0	0	0		0	0			0
Unknown																																									0	0	0		0	0			0
Unknown Aquatic																																									0	0	0		0	0			0
Utricularia\i																																									0	0	0		0	0			0
Viola\i	Violaceae																		1									0	0	0	1	1	1	0	0	1	1	0			0	1	1		1	1			0
Wahlenbergia\i	Wahlenbergia																		1	1	1							0	0	0	1	1	1	0	1	1	1	1			0	1	1		1	1			1
Xylomelum\i type	Proteaceae		1				1	1					1		1	1	1			1								1	1	1	1	1	1	1	1	1	1	1			1	1	1		1	1			1
Zygnema\i

## Sheet: Lynch Crater
good old, scores are from new		Pft																										Biome												MEGABIOMES
	Taxa	Tropical drought-deciduous malacophyll broad-leaved tree	Tropical evergreen malacophyll broad-leaved tree	Cool-temperate evergreen broad-leaved tree	Warm-temperate evergreen broad-leaved rain forest tree	Ubiquitous warm-temperate evergreen broad-leaved tree	Drought-tolerant warm-temperate evergreen broad-leaved tree	Evergreen sclerophyll broad-leaved tree	Temperate cold-deciduous broad-leaved tree	Cool-temperate evergreen needle-leaved tree	Intermediate-temperate evergreen needle-leaved tree	Tropical evergreen broad-leaved low or high shrub	Temperate malacophyll broad-leaved low of high shrub	Cool-temperate sclerophyll broad-leaved low or high shrub	Warm-temperate sclerophyll broad-leaved low or high shrub	Arctic dwarf shrub	Heath	Tropical drought-intolerant forb	Temperate drought-intolerant forb	Eurythermic drought-tolerant forb	Arctic forb	Sedge graminoid	Grass graminoid	Tree fern	Eurythermic fern or fern ally			Tropical evergreen broadleaf forest	Tropical semi-evergreen broadleaf forest	Tropical deciduous broadleaf forest and woodland	Warm-temperate rain forest	Cool evergreen needleleaf forest	Cool-temperate rain forest	Wet sclerophyll forest	Temperate or tropical grassland and xerophytic shrubland	Xerophytic woods/scrub	Temperate sclerophyll woodland and shrubland	Tundra			tropical forest	warm-temperate forest	temperate forest	boreal forest	savanna and dry woodland	grassland and dry shrubland	desert	dry tundra	tundra
Acacia	Acacia		1	1		1		1						1	1		1			1								1	1	1	1	1	1	1	1	1	1	0			1	1	1		1	1			0
Acalypha	Acalypha	1	1			1									1													1	1	1	1	0	0	1	0	1	1	0			1	1	0		1	1			0
Agathis	Agathis										1																	1	1	0	1	0	0	1	0	1	1	0			1	1	0		1	1			0
Anthoceros																																									0	0	0		0	0			0
Aphananthe	Ulmaceae																																								0	0	0		0	0			0
Apodytes	Apodytes		1																									1	1	1	0	0	0	0	0	0	0	0			1	0	0		0	0			0
Araucaria	Araucaria										1																	1	1	0	1	0	0	1	0	1	1	0			1	1	0		1	1			0
Archontophoenix comp.	Archontophoenix	1	1																									1	1	1	1	0	0	0	0	0	0	0			1	1	0		0	0			0
Argophyllum comp.																																									0	0	0		0	0			0
Argyrodendron	Argyrodendron	1																										0	1	1	1	0	0	0	0	0	0	0			1	1	0		0	0			0
Argyrodendron trifoliatum	Argyrodendron trifoliatum	1																										0	1	1	1	0	0	0	0	0	0	0			1	1	0		0	0			0
Asperula	Asperula																		1									0	0	0	1	1	1	0	0	1	1	0			0	1	1		1	1			0
Aspidium	Aspidium																								1			0	0	0	0	0	0	0	0	0	0	0			0	0	0		0	0			0
Asplenium	Asplenium																								1			0	0	0	0	0	0	0	0	0	0	0			0	0	0		0	0			0
Asteraceae (Tubuliflorae)	Asteraceae-Tubuliflorae															1	1			1	1							0	0	0	0	0	0	0	1	1	1	1			0	0	0		1	1			1
Balanops	Balanops		1																									1	1	1	0	0	0	0	0	0	0	0			1	0	0		0	0			0
Baumea comp.	Cyperaceae																																								0	0	0		0	0			0
Bischoffia	Bischofia		1																									1	1	1	0	0	0	0	0	0	0	0			1	0	0		0	0			0
Calamus	Calamus		1																									1	1	1	0	0	0	0	0	0	0	0			1	0	0		0	0			0
Callitris	Callitris										1																	1	1	0	1	0	0	1	0	1	1	0			1	1	0		1	1			0
Cardwellia	Cardwellia		1																									1	1	1	0	0	0	0	0	0	0	0			1	0	0		0	0			0
Casuarinaceae	Casuarinaceae						1	1									1											0	0	1	1	0	0	1	0	1	1	0			1	1	0		1	1			0
Celtis	Celtis	1	1																									1	1	1	1	0	0	0	0	0	0	0			1	1	0		0	0			0
Chenopodiaceae	Chenopodiaceae																			1								0	0	0	0	0	0	0	1	1	0	0			0	0	0		0	1			0
Choriceras comp.	Euphorbiaceae		1			1											1			1								1	1	1	1	0	0	1	1	1	1	0			1	1	0		1	1			0
Cissus	Cissus	1	1		1																							1	1	1	1	0	0	0	0	0	0	0			1	1	0		0	0			0
Cladium comp.	Cyperaceae																																								0	0	0		0	0			0
Cunoniaceae (dicolpate)	Cunoniaceae		1									1																1	1	1	1	0	1	0	0	0	0	0			1	1	1		0	0			0
Cunoniaceae (tricolpate)	Cunoniaceae		1									1																1	1	1	1	0	1	0	0	0	0	0			1	1	1		0	0			0
Cyathea (psilate)	Cyathea																							1				0	0	0	1	0	1	1	0	0	0	0			0	1	1		0	0			0
Cyathea divertens comp.	Cyathea																							1				0	0	0	1	0	1	1	0	0	0	0			0	1	1		0	0			0
Cyclosorus gongylodes	Cyclosorus																								1			0	0	0	0	0	0	0	0	0	0	0			0	0	0		0	0			0
Cyperaceae (other)	Cyperaceae																																								0	0	0		0	0			0
Dacrydium	Dacrydium									1	1																	1	1	0	1	1	1	1	0	1	1	0			1	1	1		1	1			0
Davalliaceae/Polypodiaceae	Davalliaceae																								1			0	0	0	0	0	0	0	0	0	0	0			0	0	0		0	0			0
Dicksonia	Dicksonia																							1				0	0	0	1	0	1	1	0	0	0	0			0	1	1		0	0			0
Dodonaea	Dodonaea			1				1				1			1					1								1	1	1	1	1	1	1	1	1	1	0			1	1	1		1	1			0
Drynaria	Drynaria																		1						1			0	0	0	1	1	1	0	0	1	1	0			0	1	1		1	1			0
Ebenaceae	Ebenaceae		1																									1	1	1	0	0	0	0	0	0	0	0			1	0	0		0	0			0
Elaeocarpus	Elaeocarpus		1	1		1																						1	1	1	1	1	1	1	0	0	0	0			1	1	1		0	0			0
Eleocharis	Eleocharis																					1						0	0	0	0	0	0	0	0	0	0	1			0	0	0		0	0			1
Eriocaulon																																									0	0	0		0	0			0
Eucalyptus type	Eucalyptus			1		1		1																				0	0	1	1	1	1	1	0	0	1	0			1	1	1		1	0			0
Euodia comp.	Euodia		1		1																							1	1	1	1	0	0	0	0	0	0	0			1	1	0		0	0			0
Ficus	Ficus		1															1										1	1	1	1	0	0	1	0	0	0	0			1	1	0		0	0			0
Flindersia	Flindersia		1			1		1																				1	1	1	1	0	0	1	0	0	1	0			1	1	0		1	0			0
Flindersia pimenteliana	Flindersia pimenteliana		1																									1	1	1	0	0	0	0	0	0	0	0			1	0	0		0	0			0
Freycinetia	Freycinetia		1		1																							1	1	1	1	0	0	0	0	0	0	0			1	1	0		0	0			0
Ganophyllum	Ganophyllum		1		1																							1	1	1	1	0	0	0	0	0	0	0			1	1	0		0	0			0
Gleichenia	Gleichenia																								1			0	0	0	0	0	0	0	0	0	0	0			0	0	0		0	0			0
Glochidion	Glochidion		1		1																							1	1	1	1	0	0	0	0	0	0	0			1	1	0		0	0			0
Glochidion sim.	Glochidion		1		1																							1	1	1	1	0	0	0	0	0	0	0			1	1	0		0	0			0
Haloragis	Haloragis																1											0	0	0	0	0	0	0	0	1	1	0			0	0	0		1	1			0
Hamamelidaceae	Hamamelidaceae																																								0	0	0		0	0			0
Helicia	Helicia				1										1	1												0	1	1	1	0	0	1	0	1	1	1			1	1	0		1	1			1
Histiopteris	Histiopteris																								1			0	0	0	0	0	0	0	0	0	0	0			0	0	0		0	0			0
Hodgkinsonia	Hodgekinsonia																	1										1	1	1	1	0	0	1	0	0	0	0			1	1	0		0	0			0
Hydrocotyle	Apiaceae																1	1	1		1							1	1	1	1	1	1	1	0	1	1	1			1	1	1		1	1			1
Hypolepis	Hypolepis																								1			0	0	0	0	0	0	0	0	0	0	0			0	0	0		0	0			0
Ilex	Ilex	1	1		1																							1	1	1	1	0	0	0	0	0	0	0			1	1	0		0	0			0
Leguminosae																																									0	0	0		0	0			0
Lemna																																									0	0	0		0	0			0
Leptospermum	Leptospermum													1			1											0	0	0	0	1	1	1	0	1	1	0			0	1	1		1	1			0
Longetia																																									0	0	0		0	0			0
Loranthaceae	Loranthaceae							1							1													0	1	1	1	0	0	1	0	1	1	0			1	1	0		1	1			0
Lygodium	Lygodium																								1			0	0	0	0	0	0	0	0	0	0	0			0	0	0		0	0			0
Macaranga	Macaranga	1	1		1	1																						1	1	1	1	0	0	1	0	0	0	0			1	1	0		0	0			0
Mallotus	Mallotus	1	1		1	1																						1	1	1	1	0	0	1	0	0	0	0			1	1	0		0	0			0
Melastoma comp.	Melastoma	1	1									1																1	1	1	1	0	1	0	0	0	0	0			1	1	1		0	0			0
Melastomataceae	Melastomataceae	1										1																1	1	1	1	0	1	0	0	0	0	0			1	1	1		0	0			0
Melicope	Melicope		1		1																							1	1	1	1	0	0	0	0	0	0	0			1	1	0		0	0			0
Melicope broadbentiana\i comp.	Melicope broadbentiana		1		1																							1	1	1	1	0	0	0	0	0	0	0			1	1	0		0	0			0
Micrantheum																																									0	0	0		0	0			0
Monolete (other)																																									0	0	0		0	0			0
Monolete (psilate)																																									0	0	0		0	0			0
Musgravea	Musgravea		1																									1	1	1	0	0	0	0	0	0	0	0			1	0	0		0	0			0
Myriophyllum																																									0	0	0		0	0			0
Myristica	Myristica		1																									1	1	1	0	0	0	0	0	0	0	0			1	0	0		0	0			0
Myrtaceae (verrucate)	Myrtaceae		1	1		1		1						1	1		1											1	1	1	1	1	1	1	0	1	1	0			1	1	1		1	1			0
Nephrolepis	Nephrolepis																	1							1			1	1	1	1	0	0	1	0	0	0	0			1	1	0		0	0			0
Nymphoides																																									0	0	0		0	0			0
Oenanthe																																									0	0	0		0	0			0
Olea	Oleaceae	1	1																									1	1	1	1	0	0	0	0	0	0	0			1	1	0		0	0			0
Omalanthus																																									0	0	0		0	0			0
Oraniopsis																																									0	0	0		0	0			0
Others																																									0	0	0		0	0			0
Philydrum																																									0	0	0		0	0			0
Platycerium																																									0	0	0		0	0			0
Poaceae	Poaceae																						1					0	0	1	0	0	0	0	1	1	1	1			1	0	0		1	1			1
Podocarpus	Podocarpus									1	1																	1	1	0	1	1	1	1	0	1	1	0			1	1	1		1	1			0
Polygonum																																									0	0	0		0	0			0
Potamogeton																																									0	0	0		0	0			0
Proteaceae (other)																																									0	0	0		0	0			0
Pteridium	Pteridium																								1			0	0	0	0	0	0	0	0	0	0	0			0	0	0		0	0			0
Pteris	Pteris																								1			0	0	0	0	0	0	0	0	0	0	0			0	0	0		0	0			0
Quintinia	Quintinia			1	1																							0	0	1	1	1	1	0	0	0	0	0			1	1	1		0	0			0
Rapanea comp.	Rapanea		1	1	1																							1	1	1	1	1	1	0	0	0	0	0			1	1	1		0	0			0
Rutaceae (other)	Rutaceae												1	1	1	1	1											1	1	1	1	1	1	1	0	1	1	1			1	1	1		1	1			1
Sapindaceae (syncolpate)	Sapindaceae		1	1		1									1													1	1	1	1	1	1	1	0	1	1	0			1	1	1		1	1			0
Sapotaceae	Sapotaceae		1		1																							1	1	1	1	0	0	0	0	0	0	0			1	1	0		0	0			0
Schiziaceae																																									0	0	0		0	0			0
Sloanea	Sloanea	1	1	1																								1	1	1	1	1	1	0	0	0	0	0			1	1	1		0	0			0
Solanaceae	Solanaceae																			1								0	0	0	0	0	0	0	1	1	0	0			0	0	0		0	1			0
Sphenostemon	Sphenostemon		1		1							1																1	1	1	1	0	1	0	0	0	0	0			1	1	1		0	0			0
Stenocarpus	Stenocarpus		1																									1	1	1	0	0	0	0	0	0	0	0			1	0	0		0	0			0
Stenochlaena																																									0	0	0		0	0			0
Stylidium	Stylidium																		1									0	0	0	1	1	1	0	0	1	1	0			0	1	1		1	1			0
Symplocos	Symplocos		1		1							1																1	1	1	1	0	1	0	0	0	0	0			1	1	1		0	0			0
Synoum comp.	Synoum		1		1																							1	1	1	1	0	0	0	0	0	0	0			1	1	0		0	0			0
Syzygium\i complex	Syzgium																	1										1	1	1	1	0	0	1	0	0	0	0			1	1	0		0	0			0
Tasmannia	Tasmannia			1		1								1														0	0	1	1	1	1	1	0	0	1	0			1	1	1		1	0			0
Thick CP3																																									0	0	0		0	0			0
Trema	Trema	1	1			1																						1	1	1	1	0	0	1	0	0	0	0			1	1	0		0	0			0
Trilete (other)																																									0	0	0		0	0			0
Typha/Sparganium																																									0	0	0		0	0			0
Unknown																																									0	0	0		0	0			0
Unknowns																																									0	0	0		0	0			0
Urticaceae/Moraceae	Urticaceae/Moraceae		1			1												1										1	1	1	1	0	0	1	0	0	0	0			1	1	0		0	0			0
Utricularia																																									0	0	0		0	0			0
Villarsia																																									0	0	0		0	0			0

## Sheet: NPK99
		Pft																										Biome												MEGABIOMES
	Taxa	Tropical drought-deciduous malacophyll broad-leaved tree	Tropical evergreen malacophyll broad-leaved tree	Cool-temperate evergreen broad-leaved tree	Warm-temperate evergreen broad-leaved rain forest tree	Ubiquitous warm-temperate evergreen broad-leaved tree	Drought-tolerant warm-temperate evergreen broad-leaved tree	Evergreen sclerophyll broad-leaved tree	Temperate cold-deciduous broad-leaved tree	Cool-temperate evergreen needle-leaved tree	Intermediate-temperate evergreen needle-leaved tree	Tropical evergreen broad-leaved low or high shrub	Temperate malacophyll broad-leaved low of high shrub	Cool-temperate sclerophyll broad-leaved low or high shrub	Warm-temperate sclerophyll broad-leaved low or high shrub	Arctic dwarf shrub	Heath	Tropical drought-intolerant forb	Temperate drought-intolerant forb	Eurythermic drought-tolerant forb	Arctic forb	Sedge graminoid	Grass graminoid	Tree fern	Eurythermic fern or fern ally			Tropical evergreen broadleaf forest	Tropical semi-evergreen broadleaf forest	Tropical deciduous broadleaf forest and woodland	Warm-temperate rain forest	Cool evergreen needleleaf forest	Cool-temperate rain forest	Wet sclerophyll forest	Temperate or tropical grassland and xerophytic shrubland	Xerophytic woods/scrub	Temperate sclerophyll woodland and shrubland	Tundra			tropical forest	warm-temperate forest	temperate forest	boreal forest	savanna and dry woodland	grassland and dry shrubland	desert	dry tundra	tundra
Acacia/Albizzia (Mimosaceae)	Acacia/Albizzia		1	1																								1	1	1	0	1	1	0	0	0	0	0			1	0	1		0	0			0
Acanthaceae	Acanthaceae		1			1																						1	1	1	1	0	0	1	0	0	0	0			1	1	0		0	0			0
Acanthaceae	Acanthaceae		1			1																						1	1	1	1	0	0	1	0	0	0	0			1	1	0		0	0			0
Adenanthera (Mimosaceae)	Mimosaceae	1	1																									1	1	1	1	0	0	0	0	0	0	0			1	1	0		0	0			0
Alnus (Betulaceae)	Alnus								1																			0	0	0	0	0	1	0	0	0	0	1			0	0	1		0	0			1
Alternanthera t. (Amaranthaceae)	Amaranthaceae																		1									0	0	0	1	1	1	0	0	1	1	0			0	1	1		1	1			0
Altingia/Liquidamber (Hammamelidaceae)	Altingia	1																										0	1	1	1	0	0	0	0	0	0	0			1	1	0		0	0			0
Anarcardiaceae	Anacardiaceae		1																									1	1	1	0	0	0	0	0	0	0	0			1	0	0		0	0			0
Antidesma type (Euphorbiaceae)	Antidesma		1																									1	1	1	0	0	0	0	0	0	0	0			1	0	0		0	0			0
Apiaceae	Apiaceae																1	1	1		1							1	1	1	1	1	1	1	0	1	1	1			1	1	1		1	1			1
Arecaeae	Arecaceae		1		1	1																						1	1	1	1	0	0	1	0	0	0	0			1	1	0		0	0			0
Artemisia (Asteraceae)	Asteraceae															1	1			1	1							0	0	0	0	0	0	0	1	1	1	1			0	0	0		1	1			1
Asteraceae	Asteraceae															1	1			1	1							0	0	0	0	0	0	0	1	1	1	1			0	0	0		1	1			1
Azolla (Azollaceae)																																									0	0	0		0	0			0
Betula t. (Betulaceae)																																									0	0	0		0	0			0
Bombax (Bombacaceae)	Bombax	1																										0	1	1	1	0	0	0	0	0	0	0			1	1	0		0	0			0
Breynia (Euphorbiaceae)	Euphorbiaceae		1			1											1			1								1	1	1	1	0	0	1	1	1	1	0			1	1	0		1	1			0
Calamus (Arecaceae)	Calamus		1																									1	1	1	0	0	0	0	0	0	0	0			1	0	0		0	0			0
Carallia brachiata (Rhizophoraceae)																																									0	0	0		0	0			0
Carpinus (Juglandaceae)	Juglandaceae		1		1																							1	1	1	1	0	0	0	0	0	0	0			1	1	0		0	0			0
Caryophyllaceae	Caryophyllaceae																		1		1							0	0	0	1	1	1	0	0	1	1	1			0	1	1		1	1			1
Cassia t. (Caesalipiniaceae)	Cassia											1																1	1	1	1	0	1	0	0	0	0	0			1	1	1		0	0			0
Casuarina t (Casuarinaceae)	Casuarina						1	1									1											0	0	1	1	0	0	1	0	1	1	0			1	1	0		1	1			0
Celastrus t. (Celastraceae)																																									0	0	0		0	0			0
Celtis (Ulmaceae)	Celtis	1	1																									1	1	1	1	0	0	0	0	0	0	0			1	1	0		0	0			0
Cephalanthus t. (Rubiaceae)	Rubiaceae				1										1	1												0	1	1	1	0	0	1	0	1	1	1			1	1	0		1	1			1
Chenopodiaceae/Amaranthaceae	Chenopodiaceae/Amaranthaceae																			1								0	0	0	0	0	0	0	1	1	0	0			0	0	0		0	1			0
Circaea t. (Onagraceae)																																									0	0	0		0	0			0
Combretaceae/Melastomataceae	Combretaceae/Melastomataceae		1																									1	1	1	0	0	0	0	0	0	0	0			1	0	0		0	0			0
Convolvulaceae	Convolvulaceae																	1	1									1	1	1	1	1	1	1	0	1	1	0			1	1	1		1	1			0
Croton (Euphorbiaceae)	Euphorbiaceae		1			1											1			1								1	1	1	1	0	0	1	1	1	1	0			1	1	0		1	1			0
Cyperaceae																																									0	0	0		0	0			0
Dacrycarpus (Podocarpaceae)	Dacrycarpus									1	1																	1	1	0	1	1	1	1	0	1	1	0			1	1	1		1	1			0
Dacrydium (Podocarpaceae)	Dacrydium									1	1																	1	1	0	1	1	1	1	0	1	1	0			1	1	1		1	1			0
Dillenia t. (Dilleniaceae)	Dillenia		1		1																							1	1	1	1	0	0	0	0	0	0	0			1	1	0		0	0			0
Diospyros (Ebanaceae)	Diospyros	1			1																							0	1	1	1	0	0	0	0	0	0	0			1	1	0		0	0			0
Dipterocarpaceae undif.	Dipterocarpaceae		1		1																							1	1	1	1	0	0	0	0	0	0	0			1	1	0		0	0			0
Dipterocarpus obtusif.(Dipterocarpaceae)	Dipterocarpus		1		1																							1	1	1	1	0	0	0	0	0	0	0			1	1	0		0	0			0
Drymaria t. (Caryophyllaceae)	Caryophyllaceae																		1		1							0	0	0	1	1	1	0	0	1	1	1			0	1	1		1	1			1
Elaeocarpus (Elaeocarpaceae)	Elaeocarpus		1	1		1																						1	1	1	1	1	1	1	0	0	0	0			1	1	1		0	0			0
Engelhardtia (Juglandaceae)	Engelhardtia		1			1																						1	1	1	1	0	0	1	0	0	0	0			1	1	0		0	0			0
Eriocaulon (Eriocaulonaceae)																																									0	0	0		0	0			0
Eugenia (Myrtaceae)	Eugenia		1		1																							1	1	1	1	0	0	0	0	0	0	0			1	1	0		0	0			0
Euphorbiaceae undif.	Euphorbiaceae		1			1											1			1								1	1	1	1	0	0	1	1	1	1	0			1	1	0		1	1			0
Euphorbiaceae undif.	Euphorbiaceae		1			1											1			1								1	1	1	1	0	0	1	1	1	1	0			1	1	0		1	1			0
Gironniera (Ulmaceae)																																									0	0	0		0	0			0
Grewia t. (Tiliaceae)	Malvaceae						1					1								1								1	1	1	1	0	1	0	1	1	1	0			1	1	1		1	1			0
Haloragis (Haloragidaceae)	Haloragis																1											0	0	0	0	0	0	0	0	1	1	0			0	0	0		1	1			0
Hernandia t. (Hernandiaceae)																																									0	0	0		0	0			0
Hydrocera trifolia (Balsaminaceae)	Hydrocera trifolia																	1										1	1	1	1	0	0	1	0	0	0	0			1	1	0		0	0			0
Hydrocharitaceae (echinate)																																									0	0	0		0	0			0
Hygrophila t. (Acanthaceae)	Acanthaceae		1			1																						1	1	1	1	0	0	1	0	0	0	0			1	1	0		0	0			0
Ilex (Aquifoliaceae)	Ilex	1	1		1																							1	1	1	1	0	0	0	0	0	0	0			1	1	0		0	0			0
Labiateae																																									0	0	0		0	0			0
Lagerstroemia (Lecythidaceae)	Lagerstroemia	1	1																									1	1	1	1	0	0	0	0	0	0	0			1	1	0		0	0			0
Liliaceae	Liliaceae																	1	1									1	1	1	1	1	1	1	0	1	1	0			1	1	1		1	1			0
Lithocarpus/Castanopsis t. (Fagaceae)	Lithocarpus/Castanopsis				1	1																						0	0	1	1	0	0	1	0	0	0	0			1	1	0		0	0			0
Loranthaceae	Loranthaceae							1							1													0	1	1	1	0	0	1	0	1	1	0			1	1	0		1	1			0
Ludwigia (Onagraceae)																																									0	0	0		0	0			0
Lygodium (Schizaeceae)	Lygodium																								1			0	0	0	0	0	0	0	0	0	0	0			0	0	0		0	0			0
Macaranga (Euphorbiaceae)	Macaranga	1	1		1	1																						1	1	1	1	0	0	1	0	0	0	0			1	1	0		0	0			0
Mallotus (Euphorbiaceae)	Mallotus	1	1		1	1																						1	1	1	1	0	0	1	0	0	0	0			1	1	0		0	0			0
Malphigiaceae																																									0	0	0		0	0			0
Melaleuca t. (Myrtaceae)	Melaleuca						1	1							1		1											0	1	1	1	0	0	1	0	1	1	0			1	1	0		1	1			0
Meliaceae	Meliaceae	1	1																									1	1	1	1	0	0	0	0	0	0	0			1	1	0		0	0			0
monolete psilate spores																																									0	0	0		0	0			0
Mussaenda t. (Rubiaceae)	Mussaenda												1					1										1	1	1	1	1	1	1	0	0	1	0			1	1	1		1	0			0
Myrica (Myricaceae)	Myrica											1																1	1	1	1	0	1	0	0	0	0	0			1	1	1		0	0			0
Myriophyllum (Haloragidaceae)																																									0	0	0		0	0			0
Myrtaceae undif.	Myrtaceae		1	1		1		1						1	1		1											1	1	1	1	1	1	1	0	1	1	0			1	1	1		1	1			0
Nymphoides (Menyanthaceae)																																									0	0	0		0	0			0
Oleaceae t.	Oleaceae	1	1																									1	1	1	1	0	0	0	0	0	0	0			1	1	0		0	0			0
Pandanus type (Pandanaceae)	Pandanus		1	1	1																							1	1	1	1	1	1	0	0	0	0	0			1	1	1		0	0			0
Phyllanthoideae-Glochidiinae t. (Euph.)	Euphorbiaceae		1			1											1			1								1	1	1	1	0	0	1	1	1	1	0			1	1	0		1	1			0
Phyllanthus t. (Euphorbiaceae)	Euphorbiaceae		1			1											1			1								1	1	1	1	0	0	1	1	1	1	0			1	1	0		1	1			0
Pinus (Pinaceae)	Pinus										1																	1	1	0	1	0	0	1	0	1	1	0			1	1	0		1	1			0
Poaceae	Poaceae																						1					0	0	1	0	0	0	0	1	1	1	1			1	0	0		1	1			1
Podocarpus (Podocarpaceae)	Podocarpus									1	1																	1	1	0	1	1	1	1	0	1	1	0			1	1	1		1	1			0
Polygalaceae	Polygalaceae															1												0	0	0	0	0	0	0	0	0	0	1			0	0	0		0	0			1
Polygonum (Polygonaceae)	Polygonaceae																		1									0	0	0	1	1	1	0	0	1	1	0			0	1	1		1	1			0
Polypodiaceae	Polypodiaceae																								1			0	0	0	0	0	0	0	0	0	0	0			0	0	0		0	0			0
Pometia (Sapindaceae)	Pometia	1	1		1																							1	1	1	1	0	0	0	0	0	0	0			1	1	0		0	0			0
Pteris (Pteridaceae)	Pteris																								1			0	0	0	0	0	0	0	0	0	0	0			0	0	0		0	0			0
Pterospermum t. (Sterculiaceae)	Sterculiaceae		1			1																						1	1	1	1	0	0	1	0	0	0	0			1	1	0		0	0			0
Quercus (Fagaceae)																																									0	0	0		0	0			0
Randia (Rubiaceae)	Randia		1																									1	1	1	0	0	0	0	0	0	0	0			1	0	0		0	0			0
Rhododendron t. (Ericaceae)	Rhododendron												1															1	1	0	1	1	1	1	0	0	1	0			1	1	1		1	0			0
Rotala t. (Lythraceae)																																									0	0	0		0	0			0
Sapindaceae	Sapindaceae		1	1		1									1													1	1	1	1	1	1	1	0	1	1	0			1	1	1		1	1			0
Sapotaceae	Sapotaceae		1		1																							1	1	1	1	0	0	0	0	0	0	0			1	1	0		0	0			0
Schoutenia t. (Tiliaceae)																																									0	0	0		0	0			0
Shorea t. (Dipterocarpaceae)	Dipterocarpaceae		1		1																							1	1	1	1	0	0	0	0	0	0	0			1	1	0		0	0			0
Solanaceae	Solanaceae																			1								0	0	0	0	0	0	0	1	1	0	0			0	0	0		0	1			0
Stenoclaena pallustris (Polypodiaceae)	Polypodiaceae																								1			0	0	0	0	0	0	0	0	0	0	0			0	0	0		0	0			0
Sticherus t.	Gleicheniaceae																								1			0	0	0	0	0	0	0	0	0	0	0			0	0	0		0	0			0
Tilia t. (Tiliaceae)																																									0	0	0		0	0			0
Trema (Ulmaceae)	Trema	1	1			1																						1	1	1	1	0	0	1	0	0	0	0			1	1	0		0	0			0
trilete psilate spores																																									0	0	0		0	0			0
Triumfetta t. (Tiliaceae)	Triumfetta														1													0	1	1	1	0	0	1	0	1	1	0			1	1	0		1	1			0
Typha (Typhaceae)																																									0	0	0		0	0			0
Ulmus (Ulmaceae)																																									0	0	0		0	0			0
Uncaria/Wendlandia t. (Rubiaceae)	Wendlandia											1																1	1	1	1	0	1	0	0	0	0	0			1	1	1		0	0			0
Urticaceae/Moraceae t. P3	Urticaceae/Moraceae		1			1												1										1	1	1	1	0	0	1	0	0	0	0			1	1	0		0	0			0
Urtricularia aurea (Lentibulariaceae)																																									0	0	0		0	0			0

## Sheet: Okarito
		1	2	3	4	5	6	7	8	9	10	11	12	13	14	15	16	17	18	19	20	21	22	23	24			1	2	3	4	5	6	7	8	9	10	11		MEGABIOMES
	Taxa	Tropical drought-deciduous malacophyll broad-leaved tree	Tropical evergreen malacophyll broad-leaved tree	Cool-temperate evergreen broad-leaved tree	Warm-temperate evergreen broad-leaved rain forest tree	Ubiquitous warm-temperate evergreen broad-leaved tree	Drought-tolerant warm-temperate evergreen broad-leaved tree	Evergreen sclerophyll broad-leaved tree	Temperate cold-deciduous broad-leaved tree	Cool-temperate evergreen needle-leaved tree	Intermediate-temperate evergreen needle-leaved tree	Tropical evergreen broad-leaved low or high shrub	Temperate malacophyll broad-leaved low of high shrub	Cool-temperate sclerophyll broad-leaved low or high shrub	Warm-temperate sclerophyll broad-leaved low or high shrub	Arctic dwarf shrub	Heath	Tropical drought-intolerant forb	Temperate drought-intolerant forb	Eurythermic drought-tolerant forb	Arctic forb	Sedge graminoid	Grass graminoid	Tree fern	Eurythermic fern or fern ally			Tropical evergreen broadleaf forest	Tropical semi-evergreen broadleaf forest	Tropical deciduous broadleaf forest and woodland	Warm-temperate rain forest	Cool evergreen needleleaf forest	Cool-temperate rain forest	Wet sclerophyll forest	Temperate or tropical grassland and xerophytic shrubland	Xerophytic woods/scrub	Temperate sclerophyll woodland and shrubland	Tundra			tropical forest	warm-temperate forest	temperate forest	boreal forest	savanna and dry woodland	grassland and dry shrubland	desert	dry tundra	tundra
Acaena	Acaena																		1		1							0	0	0	1	1	1	0	0	1	1	1			0	1	1		1	1			1
Adiantum																																									0	0	0		0	0			0
Alepis																																									0	0	0		0	0			0
Apiaceae	Apiaceae																1	1	1		1							1	1	1	1	1	1	1	0	1	1	1			1	1	1		1	1			1
Aristotelia	Aristotelia			1																								0	0	0	0	1	1	0	0	0	0	0			0	0	1		0	0			0
Ascarina	Ascarina			1		1																						0	0	1	1	1	1	1	0	0	0	0			1	1	1		0	0			0
Asplenium	Asplenium																								1			0	0	0	0	0	0	0	0	0	0	0			0	0	0		0	0			0
Astelia	Astelia																				1							0	0	0	0	0	0	0	0	0	0	1			0	0	0		0	0			1
Asteraceae	Asteraceae															1	1			1	1							0	0	0	0	0	0	0	1	1	1	1			0	0	0		1	1			1
Baumea type	Cyperaceae																																								0	0	0		0	0			0
Blechnum	Blechnum																								1			0	0	0	0	0	0	0	0	0	0	0			0	0	0		0	0			0
Bulbinella	Liliaceae																	1	1									1	1	1	1	1	1	1	0	1	1	0			1	1	1		1	1			0
Calltriche	Callitris										1																	1	1	0	1	0	0	1	0	1	1	0			1	1	0		1	1			0
Caryophyllaceae	Caryophyllaceae																		1		1							0	0	0	1	1	1	0	0	1	1	1			0	1	1		1	1			1
Casurina	Casuarina						1	1									1											0	0	1	1	0	0	1	0	1	1	0			1	1	0		1	1			0
Centrolepidaceae																																									0	0	0		0	0			0
Chenopodiaceae	Chenopodiaceae																			1								0	0	0	0	0	0	0	1	1	0	0			0	0	0		0	1			0
Coprosma	Coprosma													1	1						1							0	1	1	1	1	1	1	0	1	1	1			1	1	1		1	1			1
Coriaria																																									0	0	0		0	0			0
Cyathea dealbata	Cyathea																							1				0	0	0	1	0	1	1	0	0	0	0			0	1	1		0	0			0
Cyathea medularis	Cyathea																							1				0	0	0	1	0	1	1	0	0	0	0			0	1	1		0	0			0
Cyathea smithii	Cyathea																							1				0	0	0	1	0	1	1	0	0	0	0			0	1	1		0	0			0
Cyperaceae																																									0	0	0		0	0			0
Dacrycarpus	Dacrycarpus									1	1																	1	1	0	1	1	1	1	0	1	1	0			1	1	1		1	1			0
Dacrydium cupressinum	Dacrydium									1	1																	1	1	0	1	1	1	1	0	1	1	0			1	1	1		1	1			0
Dicksonia fibrosa	Dicksonia																							1				0	0	0	1	0	1	1	0	0	0	0			0	1	1		0	0			0
Dicksonia lanata	Dicksonia																							1				0	0	0	1	0	1	1	0	0	0	0			0	1	1		0	0			0
Dicksonia squarrosa	Dicksonia																							1				0	0	0	1	0	1	1	0	0	0	0			0	1	1		0	0			0
Discaria	Rhamnaceae		1			1								1	1		1											1	1	1	1	1	1	1	0	1	1	0			1	1	1		1	1			0
Dracophyllum	Epacridaceae					1								1		1	1											0	0	1	1	1	1	1	0	1	1	1			1	1	1		1	1			1
Drosera	Drosera																		1									0	0	0	1	1	1	0	0	1	1	0			0	1	1		1	1			0
Elaeocarpus	Elaeocarpus		1	1		1																						1	1	1	1	1	1	1	0	0	0	0			1	1	1		0	0			0
Empodisma	Restionaceae																				1							0	0	0	0	0	0	0	0	0	0	1			0	0	0		0	0			1
Euphrasia	Euphrasia																		1		1							0	0	0	1	1	1	0	0	1	1	1			0	1	1		1	1			1
Forstera	Stylidiaceae																		1									0	0	0	1	1	1	0	0	1	1	0			0	1	1		1	1			0
Fuchsia																																									0	0	0		0	0			0
Gaultheria	Ericaceae													1	1						1							0	1	1	1	1	1	1	0	1	1	1			1	1	1		1	1			1
Gentiana	Gentiana																		1		1							0	0	0	1	1	1	0	0	1	1	1			0	1	1		1	1			1
Gleichenia	Gleichenia																								1			0	0	0	0	0	0	0	0	0	0	0			0	0	0		0	0			0
Gonocarpus	Haloragis/Gonocarpus																1		1									0	0	0	1	1	1	0	0	1	1	0			0	1	1		1	1			0
Grammitis	Grammitis																								1			0	0	0	0	0	0	0	0	0	0	0			0	0	0		0	0			0
Griselinia																																									0	0	0		0	0			0
Gunnera	Gunnera																		1		1							0	0	0	1	1	1	0	0	1	1	1			0	1	1		1	1			1
Halocarpus	Podocarpaceae									1	1																	1	1	0	1	1	1	1	0	1	1	0			1	1	1		1	1			0
Hebe																																									0	0	0		0	0			0
Histiopteris	Histiopteris																								1			0	0	0	0	0	0	0	0	0	0	0			0	0	0		0	0			0
Hoheria	Malvaceae						1					1								1								1	1	1	1	0	1	0	1	1	1	0			1	1	1		1	1			0
Hymenophyllum	Hymenophyllum																								1			0	0	0	0	0	0	0	0	0	0	0			0	0	0		0	0			0
Hypolepis	Hypolepis																								1			0	0	0	0	0	0	0	0	0	0	0			0	0	0		0	0			0
Isoetes																																									0	0	0		0	0			0
Lagarostrobos	Lagarostrobus									1																		0	0	0	0	1	1	1	0	0	0	0			0	1	1		0	0			0
Lepidothamnus	Podocarpaceae									1	1																	1	1	0	1	1	1	1	0	1	1	0			1	1	1		1	1			0
Leptospermum type	Leptospermum													1			1											0	0	0	0	1	1	1	0	1	1	0			0	1	1		1	1			0
Leucopogon fasiculatus	Leucopogon						1							1		1	1											0	0	0	0	1	1	1	0	1	1	1			0	1	1		1	1			1
Libocedrus	Callitris/Cupressaceae										1																	1	1	0	1	0	0	1	0	1	1	0			1	1	0		1	1			0
Lycopodium fastigiatum	Lycopodium																								1			0	0	0	0	0	0	0	0	0	0	0			0	0	0		0	0			0
Lycopodium scariosum	Lycopodium																								1			0	0	0	0	0	0	0	0	0	0	0			0	0	0		0	0			0
Lycopodium varium	Lycopodium																								1			0	0	0	0	0	0	0	0	0	0	0			0	0	0		0	0			0
Lycopodium\i type	Lycopodium																								1			0	0	0	0	0	0	0	0	0	0	0			0	0	0		0	0			0
Melicytus	Violaceae																		1									0	0	0	1	1	1	0	0	1	1	0			0	1	1		1	1			0
Metrosideros	Metrosideros	1		1		1																						0	1	1	1	1	1	1	0	0	0	0			1	1	1		0	0			0
monolete fern spores																																									0	0	0		0	0			0
Muehlenbeckia	Muehlenbeckia												1															1	1	0	1	1	1	1	0	0	1	0			1	1	1		1	0			0
Myriophyllum																																									0	0	0		0	0			0
Myrsine																																									0	0	0		0	0			0
Neomyrtus	Myrtaceae		1	1		1		1						1	1		1											1	1	1	1	1	1	1	0	1	1	0			1	1	1		1	1			0
Nestegis	Nestigis											1																1	1	1	1	0	1	0	0	0	0	0			1	1	1		0	0			0
Nothofagus \isubg. Fuscospora	Nothofagus			1																								0	0	0	0	1	1	0	0	0	0	0			0	0	1		0	0			0
Nothofagus menziesii	Nothofagus			1																								0	0	0	0	1	1	0	0	0	0	0			0	0	1		0	0			0
Ophioglossum	Ophioglossum																	1										1	1	1	1	0	0	1	0	0	0	0			1	1	0		0	0			0
Peraxilla	Loranthaceae							1							1													0	1	1	1	0	0	1	0	1	1	0			1	1	0		1	1			0
Phyllocladus	Phyllocladus									1																		0	0	0	0	1	1	1	0	0	0	0			0	1	1		0	0			0
Phymatosorus	Polypodiaceae																								1			0	0	0	0	0	0	0	0	0	0	0			0	0	0		0	0			0
Pinus	Pinus										1																	1	1	0	1	0	0	1	0	1	1	0			1	1	0		1	1			0
Plagianthus	Malvaceae						1					1								1								1	1	1	1	0	1	0	1	1	1	0			1	1	1		1	1			0
Plantaginaceae																																									0	0	0		0	0			0
Poaceae	Poaceae																						1					0	0	1	0	0	0	0	1	1	1	1			1	0	0		1	1			1
Podocarpoid																																									0	0	0		0	0			0
Podocarpus	Podocarpus									1	1																	1	1	0	1	1	1	1	0	1	1	0			1	1	1		1	1			0
Prumnopitys ferruginea	Podocarpaceae									1	1																	1	1	0	1	1	1	1	0	1	1	0			1	1	1		1	1			0
Prumnopitys taxifolia	Podocarpaceae									1	1																	1	1	0	1	1	1	1	0	1	1	0			1	1	1		1	1			0
Pseudopanax	Araliaceae		1	1		1						1																1	1	1	1	1	1	1	0	0	0	0			1	1	1		0	0			0
Pseudowintera																																									0	0	0		0	0			0
Pteris	Pteris																								1			0	0	0	0	0	0	0	0	0	0	0			0	0	0		0	0			0
Pteris tremula	Pteris																								1			0	0	0	0	0	0	0	0	0	0	0			0	0	0		0	0			0
Quintinia	Quintinia			1	1																							0	0	1	1	1	1	0	0	0	0	0			1	1	1		0	0			0
Ranunculus	Ranunculus																				1							0	0	0	0	0	0	0	0	0	0	1			0	0	0		0	0			1
Rubus	Rubus														1													0	1	1	1	0	0	1	0	1	1	0			1	1	0		1	1			0
Sphagnum																																									0	0	0		0	0			0
trilete fern spores																																									0	0	0		0	0			0
Typha																																									0	0	0		0	0			0
Weinmannia	Cunoniaceae		1									1																1	1	1	1	0	1	0	0	0	0	0			1	1	1		0	0			0

## Sheet: Xero Wappo
		1	2	3	4	5	6	7	8	9	10	11	12	13	14	15	16	17	18	19	20	21	22	23	24			1	2	3	4	5	6	7	8	9	10	11			MEGABIOMES
	Taxa	Tropical drought-deciduous malacophyll broad-leaved tree	Tropical evergreen malacophyll broad-leaved tree	Cool-temperate evergreen broad-leaved tree	Warm-temperate evergreen broad-leaved rain forest tree	Ubiquitous warm-temperate evergreen broad-leaved tree	Drought-tolerant warm-temperate evergreen broad-leaved tree	Evergreen sclerophyll broad-leaved tree	Temperate cold-deciduous broad-leaved tree	Cool-temperate evergreen needle-leaved tree	Intermediate-temperate evergreen needle-leaved tree	Tropical evergreen broad-leaved low or high shrub	Temperate malacophyll broad-leaved low of high shrub	Cool-temperate sclerophyll broad-leaved low or high shrub	Warm-temperate sclerophyll broad-leaved low or high shrub	Arctic dwarf shrub	Heath	Tropical drought-intolerant forb	Temperate drought-intolerant forb	Eurythermic drought-tolerant forb	Arctic forb	Sedge graminoid	Grass graminoid	Tree fern	Eurythermic fern or fern ally			Tropical evergreen broadleaf forest	Tropical semi-evergreen broadleaf forest	Tropical deciduous broadleaf forest and woodland	Warm-temperate rain forest	Cool evergreen needleleaf forest	Cool-temperate rain forest	Wet sclerophyll forest	Temperate or tropical grassland and xerophytic shrubland	Xerophytic woods/scrub	Temperate sclerophyll woodland and shrubland	Tundra			tropical forest	warm-temperate forest	temperate forest	boreal forest	savanna and dry woodland	grassland and dry shrubland	desert	dry tundra	tundra
4-colpate																																									0	0	0		0	0			0
Acalypha	Acalypha	1	1			1									1													1	1	1	1	0	0	1	0	1	1	0			1	1	0		1	1			0
Agathis	Agathis										1																	1	1	0	1	0	0	1	0	1	1	0			1	1	0		1	1			0
Alphitonia comp.	Alphitonia		1		1																							1	1	1	1	0	0	0	0	0	0	0			1	1	0		0	0			0
Alyxia	Alyxia											1																1	1	1	1	0	1	0	0	0	0	0			1	1	1		0	0			0
Amaranthaceae	Amaranthaceae																		1									0	0	0	1	1	1	0	0	1	1	0			0	1	1		1	1			0
Apodytes clussifolia	Apodytes		1																									1	1	1	0	0	0	0	0	0	0	0			1	0	0		0	0			0
Araliaceae	Araliaceae		1	1		1						1																1	1	1	1	1	1	1	0	0	0	0			1	1	1		0	0			0
Araucaria	Araucaria										1																	1	1	0	1	0	0	1	0	1	1	0			1	1	0		1	1			0
Argophyllum comp.																																									0	0	0		0	0			0
Arillastrum sim. (<10 um)	Myrtaceae		1	1		1		1						1	1		1											1	1	1	1	1	1	1	0	1	1	0			1	1	1		1	1			0
Ascarina	Ascarina			1		1																						0	0	1	1	1	1	1	0	0	0	0			1	1	1		0	0			0
ASTERACEAE	Asteraceae															1	1			1	1							0	0	0	0	0	0	0	1	1	1	1			0	0	0		1	1			1
ASTERACEAE - Ligulif.	Asteraceae-Liguliflorae																		1	1	1							0	0	0	1	1	1	0	1	1	1	1			0	1	1		1	1			1
Austrobuxus spin	Austrobuxus/Dissiliaria														1		1											0	1	1	1	0	0	1	0	1	1	0			1	1	0		1	1			0
Austromyrtus sim.	Myrtaceae		1	1		1		1						1	1		1											1	1	1	1	1	1	1	0	1	1	0			1	1	1		1	1			0
Bignoniaceae comp.																																									0	0	0		0	0			0
BRASSICACEAE sim. Type 1	Brassicaceae																				1							0	0	0	0	0	0	0	0	0	0	1			0	0	0		0	0			1
Brassicaceae Type 2	Brassicaceae																				1							0	0	0	0	0	0	0	0	0	0	1			0	0	0		0	0			1
Capparis comp.																																									0	0	0		0	0			0
Carpolepis sim.	Myrtaceae		1	1		1		1						1	1		1											1	1	1	1	1	1	1	0	1	1	0			1	1	1		1	1			0
CARYOPHYLLACEAE	Caryophyllaceae																		1		1							0	0	0	1	1	1	0	0	1	1	1			0	1	1		1	1			1
Casuarinaceae	Casuarinaceae						1	1									1											0	0	1	1	0	0	1	0	1	1	0			1	1	0		1	1			0
Ceberopsis	Ceberiopsis				1	1																						0	0	1	1	0	0	1	0	0	0	0			1	1	0		0	0			0
Celtis	Celtis	1	1																									1	1	1	1	0	0	0	0	0	0	0			1	1	0		0	0			0
CHENOPODIACEAE	Chenopodiaceae																			1								0	0	0	0	0	0	0	1	1	0	0			0	0	0		0	1			0
Claoxylon	Claoxylon		1		1																							1	1	1	1	0	0	0	0	0	0	0			1	1	0		0	0			0
Coprosma	Coprosma													1	1						1							0	1	1	1	1	1	1	0	1	1	1			1	1	1		1	1			1
Cordyline comp.	Cordyline		1									1																1	1	1	1	0	1	0	0	0	0	0			1	1	1		0	0			0
Coronanthera sim.	Gesneriaceae																	1										1	1	1	1	0	0	1	0	0	0	0			1	1	0		0	0			0
Crossostylis																																									0	0	0		0	0			0
Croton	Euphorbiaceae		1			1											1			1								1	1	1	1	0	0	1	1	1	1	0			1	1	0		1	1			0
CUNONIACEAE/ELAEOCARPACEAE	Cunoniaceae/Elaeocarpaceae		1									1																1	1	1	1	0	1	0	0	0	0	0			1	1	1		0	0			0
Cyathea	Cyathea																							1				0	0	0	1	0	1	1	0	0	0	0			0	1	1		0	0			0
Cyperaceae																																									0	0	0		0	0			0
Cystopteris																																									0	0	0		0	0			0
Dacrycarpus	Dacrycarpus									1	1																	1	1	0	1	1	1	1	0	1	1	0			1	1	1		1	1			0
Dacrydium	Dacrydium									1	1																	1	1	0	1	1	1	1	0	1	1	0			1	1	1		1	1			0
Damaged/Crumpled																																									0	0	0		0	0			0
Decaspermum	Decaspermum			1																								0	0	0	0	1	1	0	0	0	0	0			0	0	1		0	0			0
Dilleniaceae	Dillenia		1		1																							1	1	1	1	0	0	0	0	0	0	0			1	1	0		0	0			0
Diospyros sim.	Diospyros	1			1																							0	1	1	1	0	0	0	0	0	0	0			1	1	0		0	0			0
Dodonaea	Dodonaea			1				1				1			1					1								1	1	1	1	1	1	1	1	1	1	0			1	1	1		1	1			0
Drimys	Drimys			1	1	1								1														0	0	1	1	1	1	1	0	0	1	0			1	1	1		1	0			0
Drosera	Drosera																		1									0	0	0	1	1	1	0	0	1	1	0			0	1	1		1	1			0
Dysoxylum	Dysoxylum		1		1																							1	1	1	1	0	0	0	0	0	0	0			1	1	0		0	0			0
EPACRIDACEAE	Epacridaceae					1								1		1	1											0	0	1	1	1	1	1	0	1	1	1			1	1	1		1	1			1
ERICACEAE	Ericaceae													1	1						1							0	1	1	1	1	1	1	0	1	1	1			1	1	1		1	1			1
Eriocaulon																																									0	0	0		0	0			0
Ervatamia (Apocynaceae)	Apocynaceae		1		1																							1	1	1	1	0	0	0	0	0	0	0			1	1	0		0	0			0
Euphorbiaceae ?	Euphorbiaceae		1			1											1			1								1	1	1	1	0	0	1	1	1	1	0			1	1	0		1	1			0
Exocarpos	Exocarpos							1								1	1											0	0	1	1	0	0	1	0	1	1	1			1	1	0		1	1			1
Ficus	Ficus		1															1										1	1	1	1	0	0	1	0	0	0	0			1	1	0		0	0			0
Flagellaria	Flagellaria																	1										1	1	1	1	0	0	1	0	0	0	0			1	1	0		0	0			0
Freycinetia	Freycinetia		1		1																							1	1	1	1	0	0	0	0	0	0	0			1	1	0		0	0			0
Gardenia	Gardenia											1																1	1	1	1	0	1	0	0	0	0	0			1	1	1		0	0			0
Geniostoma																																									0	0	0		0	0			0
Gesneriaceae	Gesneriaceae																	1										1	1	1	1	0	0	1	0	0	0	0			1	1	0		0	0			0
Gleichenia	Gleichenia																								1			0	0	0	0	0	0	0	0	0	0	0			0	0	0		0	0			0
Glochidion	Glochidion		1		1																							1	1	1	1	0	0	0	0	0	0	0			1	1	0		0	0			0
Goodeniaceae	Goodeniaceae											1		1	1	1		1	1	1	1							1	1	1	1	1	1	1	1	1	1	1			1	1	1		1	1			1
Haloragaceae P4																																									0	0	0		0	0			0
Haloragaceae P5																																									0	0	0		0	0			0
Hibbertia	Hibbertia		1										1	1	1		1											1	1	1	1	1	1	1	0	1	1	0			1	1	1		1	1			0
Homalanthus	Homalanthus		1	1		1																						1	1	1	1	1	1	1	0	0	0	0			1	1	1		0	0			0
Homalium	Homalium		1																									1	1	1	0	0	0	0	0	0	0	0			1	0	0		0	0			0
Ilex	Ilex	1	1		1																							1	1	1	1	0	0	0	0	0	0	0			1	1	0		0	0			0
Indeterminate																																									0	0	0		0	0			0
Joinvillea																																									0	0	0		0	0			0
LAURACEAE	Lauraceae		1		1																							1	1	1	1	0	0	0	0	0	0	0			1	1	0		0	0			0
Legume Unknown																																									0	0	0		0	0			0
Liliaceae	Liliaceae																	1	1									1	1	1	1	1	1	1	0	1	1	0			1	1	1		1	1			0
Lindenia sim.	Rubiaceae				1										1	1												0	1	1	1	0	0	1	0	1	1	1			1	1	0		1	1			1
Loganiaceae																																									0	0	0		0	0			0
Longetia buxoides	Longetia																																								0	0	0		0	0			0
Loranthaceae	Loranthaceae							1							1													0	1	1	1	0	0	1	0	1	1	0			1	1	0		1	1			0
Loudonia sim.																																									0	0	0		0	0			0
Lycopodium	Lycopodium																								1			0	0	0	0	0	0	0	0	0	0	0			0	0	0		0	0			0
Macaranga (coprosma Type)	Coprosma													1	1						1							0	1	1	1	1	1	1	0	1	1	1			1	1	1		1	1			1
Macaranga alchorneoides	Macaranga	1	1		1	1																						1	1	1	1	0	0	1	0	0	0	0			1	1	0		0	0			0
Macaranga other	Macaranga	1	1		1	1																						1	1	1	1	0	0	1	0	0	0	0			1	1	0		0	0			0
Machaerina	Machaerina																					1						0	0	0	0	0	0	0	0	0	0	1			0	0	0		0	0			1
Melaleuca	Melaleuca						1	1							1		1											0	1	1	1	0	0	1	0	1	1	0			1	1	0		1	1			0
Melastoma	Melastoma	1	1									1																1	1	1	1	0	1	0	0	0	0	0			1	1	1		0	0			0
Meliaceae	Meliaceae	1	1																									1	1	1	1	0	0	0	0	0	0	0			1	1	0		0	0			0
Monolete Echinate																																									0	0	0		0	0			0
Monolete Fern psilate																																									0	0	0		0	0			0
Monolete Polypodiceae																																									0	0	0		0	0			0
Monolete Rugulate																																									0	0	0		0	0			0
Monolete Scabrate																																									0	0	0		0	0			0
Monolete Verrucate																																									0	0	0		0	0			0
Montrouziera																																									0	0	0		0	0			0
Muehlenbeckia comp.	Muehlenbeckia												1															1	1	0	1	1	1	1	0	0	1	0			1	1	1		1	0			0
Myriophyllum																																									0	0	0		0	0			0
Myrsinaceae																																									0	0	0		0	0			0
Neocallitropsis ?	Neocallitropsis										1																	1	1	0	1	0	0	1	0	1	1	0			1	1	0		1	1			0
Neonauclea sim.	Neonauclea	1				1																						0	1	1	1	0	0	1	0	0	0	0			1	1	0		0	0			0
Neoscortechnia comp.																																									0	0	0		0	0			0
Nepenthes	Nepenthes											1																1	1	1	1	0	1	0	0	0	0	0			1	1	1		0	0			0
Nertera sim.	Rubiaceae				1										1	1												0	1	1	1	0	0	1	0	1	1	1			1	1	0		1	1			1
Nothofagus	Nothofagus			1																								0	0	0	0	1	1	0	0	0	0	0			0	0	1		0	0			0
Nymphoides																																									0	0	0		0	0			0
Olea sim	Oleaceae	1	1																									1	1	1	1	0	0	0	0	0	0	0			1	1	0		0	0			0
Other Monoletes																																									0	0	0		0	0			0
Other Myrtaceae	Myrtaceae		1	1		1		1						1	1		1											1	1	1	1	1	1	1	0	1	1	0			1	1	1		1	1			0
Other Trilete Fern Spores																																									0	0	0		0	0			0
Other Unknowns																																									0	0	0		0	0			0
Palms ?	Palmae	1	1		1																							1	1	1	1	0	0	0	0	0	0	0			1	1	0		0	0			0
Pandanus krauelianis Type	Pandanus		1	1	1																							1	1	1	1	1	1	0	0	0	0	0			1	1	1		0	0			0
Pandanus tectorius Type	Pandanus tectorius		1																									1	1	1	0	0	0	0	0	0	0	0			1	0	0		0	0			0
Parsonsia	Parsonsia											1																1	1	1	1	0	1	0	0	0	0	0			1	1	1		0	0			0
Phyllanthus	Euphorbiaceae		1			1											1			1								1	1	1	1	0	0	1	1	1	1	0			1	1	0		1	1			0
Piperaceae																																									0	0	0		0	0			0
Pittosporum	Pittosporum		1	1		1																						1	1	1	1	1	1	1	0	0	0	0			1	1	1		0	0			0
POACEAE	Poaceae																						1					0	0	1	0	0	0	0	1	1	1	1			1	0	0		1	1			1
Podocarpus	Podocarpus									1	1																	1	1	0	1	1	1	1	0	1	1	0			1	1	1		1	1			0
Polyscias	Polyscias		1	1	1							1																1	1	1	1	1	1	0	0	0	0	0			1	1	1		0	0			0
PROTEACEAE	Proteaceae		1				1	1					1		1	1	1			1								1	1	1	1	1	1	1	1	1	1	1			1	1	1		1	1			1
Psychotria	Psychotria		1			1																						1	1	1	1	0	0	1	0	0	0	0			1	1	0		0	0			0
Pteridium	Pteridium																								1			0	0	0	0	0	0	0	0	0	0	0			0	0	0		0	0			0
Pteris	Pteris																								1			0	0	0	0	0	0	0	0	0	0	0			0	0	0		0	0			0
Quintinia	Quintinia			1	1																							0	0	1	1	1	1	0	0	0	0	0			1	1	1		0	0			0
Randia sim.	Randia		1																									1	1	1	0	0	0	0	0	0	0	0			1	0	0		0	0			0
Ranunculus	Ranunculus																				1							0	0	0	0	0	0	0	0	0	0	1			0	0	0		0	0			1
Rapanea (counted as but not Rapanea)																																									0	0	0		0	0			0
Rauvolfia	Apocynaceae		1		1																							1	1	1	1	0	0	0	0	0	0	0			1	1	0		0	0			0
Reticulate Type A	Rauwolfia											1																1	1	1	1	0	1	0	0	0	0	0			1	1	1		0	0			0
Reticulate Type B																																									0	0	0		0	0			0
RHAMNACEAE comp.	Rhamnaceae		1			1								1	1		1											1	1	1	1	1	1	1	0	1	1	0			1	1	1		1	1			0
RHIZOPHORACEAE																																									0	0	0		0	0			0
Rubiaceae comp.	Rubiaceae				1										1	1												0	1	1	1	0	0	1	0	1	1	1			1	1	0		1	1			1
RUTACEAE	Rutaceae												1	1	1	1	1											1	1	1	1	1	1	1	0	1	1	1			1	1	1		1	1			1
SAPINDACEAE	Sapindaceae		1	1		1									1													1	1	1	1	1	1	1	0	1	1	0			1	1	1		1	1			0
SAPOTACEAE	Sapotaceae		1		1																							1	1	1	1	0	0	0	0	0	0	0			1	1	0		0	0			0
Schefflera	Schefflera		1	1	1							1																1	1	1	1	1	1	0	0	0	0	0			1	1	1		0	0			0
Schoenus																																									0	0	0		0	0			0
Solanaceae	Solanaceae																			1								0	0	0	0	0	0	0	1	1	0	0			0	0	0		0	1			0
Soulamea sim.																																									0	0	0		0	0			0
Sterculiaceae comp.	Sterculiaceae		1			1																						1	1	1	1	0	0	1	0	0	0	0			1	1	0		0	0			0
Syzigium si. (>10 um)	Myrtaceae		1	1		1		1						1	1		1											1	1	1	1	1	1	1	0	1	1	0			1	1	1		1	1			0
Syzigium sim. (<10 um)	Myrtaceae		1	1		1		1						1	1		1											1	1	1	1	1	1	1	0	1	1	0			1	1	1		1	1			0
Syzygium	Myrtaceae		1	1		1		1						1	1		1											1	1	1	1	1	1	1	0	1	1	0			1	1	1		1	1			0
Tapeinosperma sim.																																									0	0	0		0	0			0
Terminalia	Terminalia	1	1		1																							1	1	1	1	0	0	0	0	0	0	0			1	1	0		0	0			0
THYMELEACEAE																																									0	0	0		0	0			0
Trema	Trema	1	1			1																						1	1	1	1	0	0	1	0	0	0	0			1	1	0		0	0			0
Trilete psilate																																									0	0	0		0	0			0
Triporate																																									0	0	0		0	0			0
Tristaniopsis sim.	Myrtaceae		1	1		1		1						1	1		1											1	1	1	1	1	1	1	0	1	1	0			1	1	1		1	1			0
Type 157																																									0	0	0		0	0			0
Type 164																																									0	0	0		0	0			0
Type 190																																									0	0	0		0	0			0
Type 191																																									0	0	0		0	0			0
Type 192																																									0	0	0		0	0			0
Type 193																																									0	0	0		0	0			0
Type 194																																									0	0	0		0	0			0
Type 195																																									0	0	0		0	0			0
Type 196																																									0	0	0		0	0			0
Type 198																																									0	0	0		0	0			0
Type 199																																									0	0	0		0	0			0
Type 200																																									0	0	0		0	0			0
Type 201																																									0	0	0		0	0			0
Type 202																																									0	0	0		0	0			0
Type 203																																									0	0	0		0	0			0
Type 204																																									0	0	0		0	0			0
Type 205																																									0	0	0		0	0			0
Type 206																																									0	0	0		0	0			0
Type 207																																									0	0	0		0	0			0
Type 208																																									0	0	0		0	0			0
Type 209																																									0	0	0		0	0			0
Type 210																																									0	0	0		0	0			0
Type 211																																									0	0	0		0	0			0
Type 212																																									0	0	0		0	0			0
Type 213																																									0	0	0		0	0			0
Type 214																																									0	0	0		0	0			0
Type 215																																									0	0	0		0	0			0
Type 24																																									0	0	0		0	0			0
Type 63																																									0	0	0		0	0			0
Type 89																																									0	0	0		0	0			0
Type 95																																									0	0	0		0	0			0
ULMACEAE																																									0	0	0		0	0			0
Unknown Types																																									0	0	0		0	0			0
Uromyrtus	Myrtaceae		1	1		1		1						1	1		1											1	1	1	1	1	1	1	0	1	1	0			1	1	1		1	1			0
Urticaceae sim.	Urticaceae		1			1												1	1		1							1	1	1	1	1	1	1	0	1	1	1			1	1	1		1	1			1
VERBENACEAE	Verbenaceae											1																1	1	1	1	0	1	0	0	0	0	0			1	1	1		0	0			0
Wikstromia sim.																																									0	0	0		0	0			0
Xanthomyrtus	Xanthomyrtus			1	1																							0	0	1	1	1	1	0	0	0	0	0			1	1	1		0	0			0
