# Supplementary material for: Terrestrial biosphere changes over the last 120 kyr
Source: Copernicus journal article supplement (doi:10.5194/cp-12-51-2016), 2016-01-18
Supplement: Supplementary file 1 [file cp-12-51-2016-supplement.zip › supplement/Australasia/BiomizationTarasovaetal.xls]

## Sheet: Lake Baikal
		arctic /alpine dwarf shrub	arctic /boreal dwarf shrub	boreal evergreen conifer	boreal summergreen	boreal-temperate summergreen shrub	cool-boreal conifer shrub	cool-temperate conifer	desert forb	eurythermic conifer	grass	heath	sedge	steppe forb	temperate summergreen	cool-temperate summergreen	warm-temperate summergreen	southern warm-temperate summergreen	warm-temperate broadleaved evergreen	warm-temperate sclerophyll shrub			MEGABIOMES								MEGABIOMES
		aa	ab	bec	bs	bts	cbc	ctc	df	ec	g	h	s	sf	ts	ts1	ts2	ts3	wte	wte2			tundra	boreal forest	temperate forest	warm temperate forest	desert	grassland and dry shurbland		sqrt	tundra	boreal forest	temperate forest	warm temperate forest	desert	grassland and dry shurbland
Abies sibirica	Abies			1				1															0	1	1	0	0	0		0	0	0	0	0	0	0
Aconitum																							0	0	0	0	0	0		0	0	0	0	0	0	0
Allium	Allium													1									0	0	0	0	0	1		0	0	0	0	0	0	0
Alnus hirsuta-type	Alnus fruticosa-type	1																					1	0	0	0	0	0		0	0	0	0	0	0	0
Anemone	Alnus undiff.	1			1										1								1	1	1	1	0	0		0	0	0	0	0	0	0
Anthemis-type																							0	0	0	0	0	0		0	0	0	0	0	0	0
Apiaceae undiff.	Apiaceae													1									0	0	0	0	0	1		0	0	0	0	0	0	0
Arenaria-type																							0	0	0	0	0	0		0	0	0	0	0	0	0
Armeria																							0	0	0	0	0	0		0	0	0	0	0	0	0
Artemisia	Artemisia								1					1									0	0	0	0	1	1		0	0	0	0	0	0	0
Asteraceae Asteroideae undiff.	Asteraceae (Asteroideae)													1									0	0	0	0	0	1		0	0	0	0	0	0	0
Asteraceae Cichorioideae undiff.	Asteraceae (Cichorioideae)													1									0	0	0	0	0	1		0	0	0	0	0	0	0
Aster-type	Asteraceae undiff.													1									0	0	0	0	0	1		0	0	0	0	0	0	0
Athyrium filix-femina																							0	0	0	0	0	0		0	0	0	0	0	0	0
Betula sect. Albae	Betula (Albae)				1																		0	1	1	0	0	0		0	0	0	0	0	0	0
Betula sect. Nanae/Fruticosae	Betula nana-type	1																					1	0	0	0	0	0		0	0	0	0	0	0	0
Boraginaceae undiff.	Boraginaceae								1					1									0	0	0	0	1	1		0	0	0	0	0	0	0
Botrychium lunaria-type																							0	0	0	0	0	0		0	0	0	0	0	0	0
Botryococcus																							0	0	0	0	0	0		0	0	0	0	0	0	0
Brassicaceae	Brassicaceae													1									0	0	0	0	0	1		0	0	0	0	0	0	0
Carpinus	Carpinus															1							0	1	1	1	0	0		0	0	0	0	0	0	0
Caryophyllaceae undiff.	Caryophyllaceae													1									0	0	0	0	0	1		0	0	0	0	0	0	0
Cerastium-type																							0	0	0	0	0	0		0	0	0	0	0	0	0
Ceratophyllum, spine hairs																							0	0	0	0	0	0		0	0	0	0	0	0	0
cf. Cannabis																							0	0	0	0	0	0		0	0	0	0	0	0	0
cf. Lobelia																							0	0	0	0	0	0		0	0	0	0	0	0	0
Chamaenerion/Epilobium																							0	0	0	0	0	0		0	0	0	0	0	0	0
Chenopodiaceae/Amaranthaceae	Chenopodiaceae								1					1									0	0	0	0	1	1		0	0	0	0	0	0	0
Chrysoplenium																							0	0	0	0	0	0		0	0	0	0	0	0	0
Circaea																							0	0	0	0	0	0		0	0	0	0	0	0	0
Cirsium-type																							0	0	0	0	0	0		0	0	0	0	0	0	0
Corylus	Corylus															1							0	1	1	1	0	0		0	0	0	0	0	0	0
Cotoneaster																							0	0	0	0	0	0		0	0	0	0	0	0	0
Cyperaceae undiff.	Cyperaceae												1										1	0	0	0	0	0		0	0	0	0	0	0	0
Dianthus-type																							0	0	0	0	0	0		0	0	0	0	0	0	0
Diphasiastrum alpinum																							0	0	0	0	0	0		0	0	0	0	0	0	0
Diphasiastrum complanatum-type																							0	0	0	0	0	0		0	0	0	0	0	0	0
Dryopteris-type																							0	0	0	0	0	0		0	0	0	0	0	0	0
Duschekia fruticosa																							0	0	0	0	0	0		0	0	0	0	0	0	0
Ephedra distachya-type	Ephedra								1														0	0	0	0	1	0		0	0	0	0	0	0	0
Ephedra fragilis-type	Ephedra								1														0	0	0	0	1	0		0	0	0	0	0	0	0
Equisetum																							0	0	0	0	0	0		0	0	0	0	0	0	0
Ericaceae undiff.	Ericales											1											1	1	1	1	0	0		0	0	0	0	0	0	0
Fabaceae undiff.	Fabaceae													1									0	0	0	0	0	1		0	0	0	0	0	0	0
Filicales Monoletae undiff.																							0	0	0	0	0	0		0	0	0	0	0	0	0
Filipendula																							0	0	0	0	0	0		0	0	0	0	0	0	0
Fraxinus																							0	0	0	0	0	0		0	0	0	0	0	0	0
Galium-type																							0	0	0	0	0	0		0	0	0	0	0	0	0
Genista-type																							0	0	0	0	0	0		0	0	0	0	0	0	0
Gentianaceae undiff.																							0	0	0	0	0	0		0	0	0	0	0	0	0
Geum-type																							0	0	0	0	0	0		0	0	0	0	0	0	0
Gypsophila																							0	0	0	0	0	0		0	0	0	0	0	0	0
Helianthemum																							0	0	0	0	0	0		0	0	0	0	0	0	0
Humulus/Cannabis	Cannabis													1									0	0	0	0	0	1		0	0	0	0	0	0	0
Huperzia																							0	0	0	0	0	0		0	0	0	0	0	0	0
Hypericum																							0	0	0	0	0	0		0	0	0	0	0	0	0
Indet. pollen, concealed/crumpled																							0	0	0	0	0	0		0	0	0	0	0	0	0
Indet. pollen, corroded/broken/degraded																							0	0	0	0	0	0		0	0	0	0	0	0	0
Indet. pollen, unknown																							0	0	0	0	0	0		0	0	0	0	0	0	0
Indeterminatae																							0	0	0	0	0	0		0	0	0	0	0	0	0
Juniperus	Juniperus									1													0	1	1	1	0	0		0	0	0	0	0	0	0
Lamiaceae undiff.	Lamiaceae													1									0	0	0	0	0	1		0	0	0	0	0	0	0
Larix	Larix				1																		0	1	1	0	0	0		0	0	0	0	0	0	0
Leguminosae undiff.																							0	0	0	0	0	0		0	0	0	0	0	0	0
Liliaceae undiff.																							0	0	0	0	0	0		0	0	0	0	0	0	0
Lotus																							0	0	0	0	0	0		0	0	0	0	0	0	0
Lycopodiella inundata																							0	0	0	0	0	0		0	0	0	0	0	0	0
Lycopodium annotinum-type																							0	0	0	0	0	0		0	0	0	0	0	0	0
Lycopodium/Diphasiastrum (incl. L. clavatum)																							0	0	0	0	0	0		0	0	0	0	0	0	0
Lysimachia undiff.																							0	0	0	0	0	0		0	0	0	0	0	0	0
Mentha-type																							0	0	0	0	0	0		0	0	0	0	0	0	0
Menyanthes trifoliata																							0	0	0	0	0	0		0	0	0	0	0	0	0
Myriophyllum verticillatum																							0	0	0	0	0	0		0	0	0	0	0	0	0
Naumburgia thyrsiflora																							0	0	0	0	0	0		0	0	0	0	0	0	0
Nymphaeaceae, basal hair cells																							0	0	0	0	0	0		0	0	0	0	0	0	0
Nymphaeaceae, idioblasts																							0	0	0	0	0	0		0	0	0	0	0	0	0
Onagraceae undiff.																							0	0	0	0	0	0		0	0	0	0	0	0	0
Onobrychis/Hedysarum																							0	0	0	0	0	0		0	0	0	0	0	0	0
Osmunda undiff.																							0	0	0	0	0	0		0	0	0	0	0	0	0
Pediastrum angulosum var. angulosum																							0	0	0	0	0	0		0	0	0	0	0	0	0
Pediastrum boryanum var. boryanum																							0	0	0	0	0	0		0	0	0	0	0	0	0
Pediastrum boryanum var. cornutum																							0	0	0	0	0	0		0	0	0	0	0	0	0
Pediastrum boryanum var. longicorne																							0	0	0	0	0	0		0	0	0	0	0	0	0
Pediastrum boryanum var. pseudoglabrum																							0	0	0	0	0	0		0	0	0	0	0	0	0
Pediastrum duplex																							0	0	0	0	0	0		0	0	0	0	0	0	0
Pediastrum duplex var. asperum																							0	0	0	0	0	0		0	0	0	0	0	0	0
Pediastrum duplex var. duplex																							0	0	0	0	0	0		0	0	0	0	0	0	0
Pediastrum duplex var. gracillinum																							0	0	0	0	0	0		0	0	0	0	0	0	0
Pediastrum duplex var. rugulosum																							0	0	0	0	0	0		0	0	0	0	0	0	0
Pediastrum kawrayskii																							0	0	0	0	0	0		0	0	0	0	0	0	0
Pediastrum simplex var. clathratum																							0	0	0	0	0	0		0	0	0	0	0	0	0
Pediastrum simplex var. echinulentum																							0	0	0	0	0	0		0	0	0	0	0	0	0
Pediastrum simplex var. pseudoglabratum																							0	0	0	0	0	0		0	0	0	0	0	0	0
Pediastrum simplex var. simplex																							0	0	0	0	0	0		0	0	0	0	0	0	0
Pediastrum simplex var. sturmii																							0	0	0	0	0	0		0	0	0	0	0	0	0
Pediastrum subgranulatum																							0	0	0	0	0	0		0	0	0	0	0	0	0
Pediastrum undiff.																							0	0	0	0	0	0		0	0	0	0	0	0	0
Picea obovata	Picea			1																			0	1	1	0	0	0		0	0	0	0	0	0	0
Pinus sibirica-type	Pinus (Haploxylon)			1			1																0	1	1	0	0	0		0	0	0	0	0	0	0
Pinus sylvestris-type	Pinus (Diploxylon)									1													0	1	1	1	0	0		0	0	0	0	0	0	0
Plantago lanceolata	Plantago													1									0	0	0	0	0	1		0	0	0	0	0	0	0
Plantago major	Plantago													1									0	0	0	0	0	1		0	0	0	0	0	0	0
Plantago undiff.	Plantago													1									0	0	0	0	0	1		0	0	0	0	0	0	0
Poaceae undiff.	Poaceae										1												1	0	0	0	0	1		0	0	0	0	0	0	0
Podocarpus																							0	0	0	0	0	0		0	0	0	0	0	0	0
Polemonium																							0	0	0	0	0	0		0	0	0	0	0	0	0
Polygonum aviculare-type	Polygonaceae	1							1					1									1	0	0	0	1	1		0	0	0	0	0	0	0
Polygonum bistorta-type	Polygonaceae	1							1					1									1	0	0	0	1	1		0	0	0	0	0	0	0
Polygonum persicaria-type	Polygonaceae	1							1					1									1	0	0	0	1	1		0	0	0	0	0	0	0
Polypodium																							0	0	0	0	0	0		0	0	0	0	0	0	0
Populus	Populus				1																		0	1	1	0	0	0		0	0	0	0	0	0	0
Potamogeton																							0	0	0	0	0	0		0	0	0	0	0	0	0
Potentilla-type																							0	0	0	0	0	0		0	0	0	0	0	0	0
Prunus																							0	0	0	0	0	0		0	0	0	0	0	0	0
Pteridium aquilinum																							0	0	0	0	0	0		0	0	0	0	0	0	0
Pterocarya	Pterocarya																1						0	0	1	1	0	0		0	0	0	0	0	0	0
Pulsatilla																							0	0	0	0	0	0		0	0	0	0	0	0	0
Quercus	Quercus undiff.														1				1				0	0	1	1	0	0		0	0	0	0	0	0	0
Ranunculaceae undiff.	Ranunculaceae													1									0	0	0	0	0	1		0	0	0	0	0	0	0
Ranunculus acris-type	Ranunculaceae													1									0	0	0	0	0	1		0	0	0	0	0	0	0
Ranunculus aquatilis-type	Ranunculaceae													1									0	0	0	0	0	1		0	0	0	0	0	0	0
Ranunculus flammula-type	Ranunculaceae													1									0	0	0	0	0	1		0	0	0	0	0	0	0
Rhinanthus-type																							0	0	0	0	0	0		0	0	0	0	0	0	0
Rosaceae undiff.	Rosaceae													1									0	0	0	0	0	1		0	0	0	0	0	0	0
Rubus-type																							0	0	0	0	0	0		0	0	0	0	0	0	0
Rumex acetosa-type																							0	0	0	0	0	0		0	0	0	0	0	0	0
Rumex acetosella-type																							0	0	0	0	0	0		0	0	0	0	0	0	0
Sagina																							0	0	0	0	0	0		0	0	0	0	0	0	0
Salix	Salix	1			1										1								1	1	1	1	0	0		0	0	0	0	0	0	0
Salvinia																							0	0	0	0	0	0		0	0	0	0	0	0	0
Sambucus																							0	0	0	0	0	0		0	0	0	0	0	0	0
Sanguisorba officinalis																							0	0	0	0	0	0		0	0	0	0	0	0	0
Saussurea-type																							0	0	0	0	0	0		0	0	0	0	0	0	0
Saxifraga granulata-type	Saxifragaceae	1																					1	0	0	0	0	0		0	0	0	0	0	0	0
Saxifraga oppositifolia-type	Saxifragaceae	1																					1	0	0	0	0	0		0	0	0	0	0	0	0
Saxifraga stellaris-type	Saxifragaceae	1																					1	0	0	0	0	0		0	0	0	0	0	0	0
Sedum-type																							0	0	0	0	0	0		0	0	0	0	0	0	0
Selaginella helvetica																							0	0	0	0	0	0		0	0	0	0	0	0	0
Selaginella rupestris																							0	0	0	0	0	0		0	0	0	0	0	0	0
Selaginella sanguinolenta																							0	0	0	0	0	0		0	0	0	0	0	0	0
Selaginella selaginoides																							0	0	0	0	0	0		0	0	0	0	0	0	0
Selaginella undiff.																							0	0	0	0	0	0		0	0	0	0	0	0	0
Serratula-type																							0	0	0	0	0	0		0	0	0	0	0	0	0
Silene-type																							0	0	0	0	0	0		0	0	0	0	0	0	0
Solanum dulcamara-type																							0	0	0	0	0	0		0	0	0	0	0	0	0
Sorbus																							0	0	0	0	0	0		0	0	0	0	0	0	0
Sparganium/Typha																							0	0	0	0	0	0		0	0	0	0	0	0	0
Spergula-type																							0	0	0	0	0	0		0	0	0	0	0	0	0
Sphagnum																							0	0	0	0	0	0		0	0	0	0	0	0	0
Spirogyra																							0	0	0	0	0	0		0	0	0	0	0	0	0
Tetraedron																							0	0	0	0	0	0		0	0	0	0	0	0	0
Thalictrum																							0	0	0	0	0	0		0	0	0	0	0	0	0
Tilia cordata-type	Tilia															1							0	1	1	1	0	0		0	0	0	0	0	0	0
Trollius																							0	0	0	0	0	0		0	0	0	0	0	0	0
Typha latifolia-type																							0	0	0	0	0	0		0	0	0	0	0	0	0
Ulmus	Ulmus															1							0	1	1	1	0	0		0	0	0	0	0	0	0
Urticaceae																							0	0	0	0	0	0		0	0	0	0	0	0	0
Vaccinium-type																							0	0	0	0	0	0		0	0	0	0	0	0	0
Valeriana/Patrinia																							0	0	0	0	0	0		0	0	0	0	0	0	0
Veronica-type																							0	0	0	0	0	0		0	0	0	0	0	0	0
																															0	0	0	0	0	0
