# Supplementary material for: Terrestrial biosphere changes over the last 120 kyr
Source: Copernicus journal article supplement (doi:10.5194/cp-12-51-2016), 2016-01-18
Supplement: Supplementary file 1 [file cp-12-51-2016-supplement.zip › supplement/Australasia/Japan_scores_Takahashietal1999.xls]

## Sheet: scores
Age	broadleaved evergreen/warm mixed forest	cold deciduous forest	cold desert	cold evergreen needleleaf forest	cold mixed forest	cool conifer forest	cool evergreen needleleaf forest	cool-temperate evergreen needleleaf and mixed forest	cool-temperate evergreen needleleaf forest	cool-temperate rain forest	cushion forb tundra	desert	erect dwarf shrub tundra	graminoid and forb tundra	low and high shrub tundra	open conifer woodland	prostrate dwarf shrub tundra	savanna	steppe	taiga	temperate conifer forest	temperate deciduous broadleaf forest	temperate deciduous forest	temperate grassland and xerophytic shrubland/	temperate or tropical grassland and xerophytic shrubland	temperate sclerophyll woodland and shrubland	temperate xerophytic shrubland	temperate xerophytic woods/scrub	tropical deciduous broadleaf forest and woodland	tropical dry forest	tropical dry forest/savanna	tropical evergreen broadleaf forest	tropical rain forest	tropical seasonal forest	tropical semi-evergreen broadleaf forest	tropical xerophytic woods/scrub	tundra	warm mixed forest	warm-temperate evergreen broadleaf and mixed forest	warm-temperate rain forest	wet sclerophyll forest	xerophytic woods/scrub
454	27.3644	11.5154	0	8.67689	16.9235	14.8401	8.67689	12.0017	0	0	0	3.21547	0	0	0	4.37349	0	2.81354	6.51528	10.9469	20.482	17.099	29.7368	0	0	0	11.83	4.37349	2.81354	2.81354	4.01934	8.02493	0.56842	8.02493	9.23073	0	8.85793	17.4974	23.8888	0	0	15.212
1134	26.3197	7.99843	0	6.00238	12.663	11.5793	6.00238	9.58325	0	0	0	1.22885	0	0	0	2.64181	0	0.819232	5.20373	7.99843	17.7322	15.9412	30.0225	0	0	0.409616	12.6526	2.64181	0.819232	0.819232	2.65109	10.0108	0	10.0108	11.8426	0	6.32283	18.7748	24.247	0	0	13.8814
1864	26.8808	10.243	0	7.6633	19.3017	16.3885	7.6633	13.8088	0	0	0	2.28129	0	0	0	4.12691	0	1.10122	5.4725	10.243	22.2857	18.2675	34.6161	0	0	0	9.95255	4.12691	1.10122	1.10122	2.98398	5.82564	0	5.82564	7.70839	0	6.94721	19.0236	23.3567	0	0	11.0538
2495	24.9773	10.4425	0	8.19056	17.1387	15.9691	8.19056	13.7172	0	0	0	2.95123	0	0	0	3.26004	0	2.13643	6.23299	9.68037	19.8645	17.5953	31.088	0	0	0	9.95432	3.26004	2.13643	2.13643	4.74506	7.45645	0.762176	7.45645	10.0651	0	7.3853	19.2419	23.8077	0	0	12.8529
3203	24.6551	20.4502	0	20.0311	27.7197	27.1414	20.0311	22.674	0	0	0	1.08193	0	0	0	7.0117	0	1.08193	3.94852	19.2805	24.5288	24.8887	32.0538	0	0	0.578315	8.30485	7.0117	1.08193	1.08193	3.51841	4.487	3.19385	4.487	6.92348	0	7.21025	17.5135	20.1189	0	0	13.1589
3544	20.2033	22.2728	0	17.3865	28.4697	28.4697	17.3865	21.6536	0	0	0	2.297	0	0	0	3.70381	0	2.297	7.91753	20.6128	24.2316	22.9952	33.8835	0	0	0	4.53013	3.70381	2.297	2.297	6.18877	3.45123	2.62491	3.45123	7.343	0	13.0911	17.7705	17.6205	0	0	9.45204
13749	22.2737	22.2669	0	20.3077	26.8632	26.0813	20.3077	21.1733	0	0	0	5.24513	0	0	0	5.06473	0	2.81929	10.9747	19.4903	23.7701	23.0163	31.4149	0	0	0.582816	6.41907	5.06473	2.81929	2.81929	5.29196	5.6053	4.25096	5.6053	8.07798	0	12.5934	14.1106	17.3257	0	0	14.0721
17114	21.5455	22.9825	0	23.0364	25.3623	25.3623	23.0364	20.6566	0	0	0	2.51005	0	0	0	5.33869	0	1.92856	5.76524	20.0568	21.7657	21.8195	27.194	0	0	0.872226	7.15368	5.33869	1.92856	1.92856	4.30839	7.12054	5.30554	7.12054	9.50036	0	9.01729	11.9133	17.165	0	0	15.26
20058	22.0636	22.3999	0	21.3838	28.2433	28.2433	21.3838	22.8362	0	0	0	2.88394	0	0	0	4.90928	0	2.33073	7.66699	21.1517	23.9397	24.1718	30.3659	0	0	0.782361	6.0157	4.90928	2.33073	2.33073	5.21858	4.55015	3.44372	4.55015	7.438	0	11.8931	15.9952	18.3423	0	0	12.5725
22792	20.3731	22.1645	0	21.7009	27.3122	27.3122	21.7009	22.55	0	0	0	1.25	0	0	0	4.47669	0	1.25	4.72736	22.5653	22.986	24.1517	29.9824	0	0	0	5.2139	4.47669	1.25	1.25	6.06308	2.48566	1.74845	2.48566	7.29874	0	8.50589	16.804	15.6383	0	0	8.21235
27292	24.7763	22.1613	0	18.5126	30.367	29.9023	18.5126	22.5942	0	0	0	4.5143	0	0	0	3.7077	0	3.58483	10.2546	20.4899	26.9746	25.3531	36.4737	0	0	0	5.75916	3.7077	3.58483	3.58483	8.18551	5.55246	3.501	5.55246	10.1531	0	13.6583	18.7749	20.124	0	0	12.845
31699	27.0759	21.1386	0	17.2966	28.9682	27.96	17.2966	21.8079	0	0	0	4.16648	0	0	0	5.22959	0	3.15826	9.12714	20.0251	27.0773	25.1717	37.1037	0	0	0	7.42363	5.22959	3.15826	3.15826	7.11963	4.46255	2.26851	4.46255	8.42393	0	12.1875	19.3556	22.3984	0	0	12.8504
38398	26.3217	23.8879	0	19.629	31.4303	30.0133	19.629	22.245	0	0	0	1.81102	0	0	0	4.12249	0	1.29358	7.80884	21.0073	29.7379	25.1587	37.6362	0	0	0	6.3045	4.12249	1.29358	1.29358	5.44113	6.81731	4.63529	6.81731	10.9649	0	11.1446	16.7415	20.9216	0	0	12.2334
42982	25.2108	22.2466	0	19.4227	31.1327	28.1884	19.4227	22.1696	0	0	0	2.98133	0	0	0	5.97313	0	1.85176	7.56867	19.317	27.7038	23.2992	36.1122	0	0	0	6.53791	5.97313	1.85176	1.85176	4.60417	5.09186	4.52708	5.09186	7.84427	0	9.96484	15.2321	18.4926	0	0	12.9167
45802	26.6657	21.7751	0	19.1946	30.3934	26.1586	19.1946	19.8078	0	0	0	1.4374	0	0	0	4.79669	0	0.57496	6.61519	18.79	29.208	21.6574	35.095	0	0	0.57496	6.18476	4.79669	0.57496	0.57496	3.31734	6.25829	4.87022	6.25829	9.00067	0	8.34007	12.5754	19.2556	0	0	12.2049
53207	25.3239	17.6227	0	15.2063	27.5294	24.1931	15.2063	19.717	0	0	0	2.26564	0	0	0	4.6768	0	1.76611	8.04917	16.377	26.3055	21.4533	34.75	0	0	0	5.88277	4.6768	1.76611	1.76611	5.74673	3.48145	2.27548	3.48145	7.46207	0	8.94971	16.3045	19.1142	0	0	9.92436
55322	26.3729	20.8436	0	16.4526	30.8528	28.9763	16.4526	22.5419	0	0	0	3.87681	0	0	0	4.89926	0	2.43924	10.1225	19.9134	27.9167	24.9186	37.6961	0	0	0	6.26999	4.89926	2.43924	2.43924	7.30165	3.32266	1.95193	3.32266	8.18507	0	12.5341	20.0088	20.665	0	0	10.6612
61669	25.9495	24.1693	0	21.5855	30.7279	29.7351	21.5855	22.4786	0	0	0	1.95468	0	0	0	6.58313	0	1.40399	8.25157	23.0999	28.3334	24.9567	34.608	0	0	0.992771	7.68451	6.58313	1.40399	1.40399	4.23884	4.50721	3.40583	4.50721	7.34207	0	10.7878	14.7416	18.9734	0	0	13.4871
67134	27.0365	24.4272	0	21.7402	30.5676	28.4518	21.7402	22.3225	0	0	0	3.06465	0	0	0	7.01107	0	1.72118	9.07717	22.8625	29.1497	24.43	32.8123	0	0	1.08857	8.15853	7.01107	1.72118	1.72118	5.66283	4.43327	3.28581	4.43327	8.37491	0	11.3962	15.6342	20.8855	0	0	14.2541
69426	25.3118	22.5429	0	21.3564	28.0084	26.036	21.3564	20.4554	0	0	0	2.19706	0	0	0	6.12827	0	2.19706	6.94172	21.0207	27.1534	22.5566	29.6396	0	0	0.536828	7.47034	6.12827	2.19706	2.19706	6.15105	5.06132	3.71925	5.06132	9.01531	0	8.77456	13.4795	19.2775	0	0	13.9235
74362	25.5266	19.1571	0	18.2114	23.6557	21.2433	18.2114	17.1908	0	0	0	1.5534	0	0	0	5.68224	0	1.5534	6.11609	18.0068	22.7176	19.0557	25.2992	0	0	0	6.74787	5.68224	1.5534	1.5534	5.97928	3.76935	2.70373	3.76935	8.19523	0	7.36565	12.9561	20.5176	0	0	11.005
76653	23.5483	13.0589	0	11.7305	19.4227	16.2514	11.7305	12.708	0	0	0	1.52028	0	0	0	5.17295	0	0.948382	5.72488	13.4099	18.3152	13.2799	19.8355	0	0	0	5.17295	5.17295	0.948382	0.948382	3.97457	0.756547	0.756547	0.756547	3.78273	0	5.72488	10.2841	18.1377	0	0	6.87788
84358	26.2914	15.781	0	15.0998	25.324	20.5485	15.0998	16.9464	0	0	0	1.82129	0	0	0	3.65391	0	1.24846	5.3114	15.0981	22.7538	18.4069	29.2502	0	0	0.572833	3.65391	3.65391	1.24846	1.24846	4.53914	2.14335	2.14335	2.14335	5.43402	0	7.64428	12.0117	18.4872	0	0	7.61855
86970	29.2411	13.7886	0	11.0621	24.726	19.6777	11.0621	16.9512	0	0	0	2.38002	0	0	0	2.47436	0	1.55523	5.4274	11.9443	26.3107	20.5901	34.0174	0	0	0	4.87769	2.47436	1.55523	1.55523	5.52983	4.24761	1.84428	4.24761	8.22221	0	6.86695	15.5662	21.844	0	0	8.2772
89269	26.9599	17.7102	0	15.3081	24.6037	22.9629	15.3081	19.548	0	0	0	1.56074	0	0	0	5.08451	0	1.56074	6.00352	16.0682	24.7156	22.5947	33.3607	0	0	0	6.36676	5.08451	1.56074	1.56074	6.52858	3.4306	2.14834	3.4306	8.39844	0	7.93386	17.2951	22.7181	0	0	10.0758
92821	30.4263	18.8305	0	16.3473	27.7068	21.6253	16.3473	19.1421	0	0	0	1.92065	0	0	0	6.60213	0	0.795557	4.0743	16.299	28.715	22.3826	33.5632	0	0	0.562544	9.14727	6.60213	0.795557	0.795557	4.88127	5.07659	2.53145	5.07659	9.1623	0	5.6112	17.0021	22.0583	0	0	13.0368
95955	22.112	12.4309	0	11.6927	16.6643	13.4749	11.6927	12.7367	0	0	0	0.521996	0	0	0	6.69098	0	0.521996	1.99842	12.4309	16.2333	13.7806	19.3169	0	0	0	6.69098	6.69098	0.521996	0.521996	3.36516	0	0	0	2.84316	0	2.95145	11.5312	17.195	0	0	7.21297
97000	25.68	10.8543	0	10.8543	18.6975	12.2634	10.8543	12.2634	0	0	0	1.13488	0	0	0	5.58488	0	1.13488	2.14084	9.71939	19.8295	13.3953	22.7551	0	0	0	6.9127	5.58488	1.13488	1.13488	3.63603	2.4627	1.13488	2.4627	4.96385	0	2.14084	10.8229	17.6125	0	0	9.18246
100532	26.2068	12.6123	0	12.1731	21.0787	15.891	12.1731	14.2517	0	0	0	0.848571	0	0	0	4.23714	0	0.848571	2.92714	12.1731	21.0757	16.491	25.2574	0	0	0	4.83717	4.23714	0.848571	0.848571	3.58184	1.63931	1.03928	1.63931	4.37258	0	4.56947	11.8914	19.098	0	0	6.72503
102577	27.03	12.6441	0	11.7989	21.1628	16.1273	11.7989	15.2821	0	0	0	1.19523	0	0	0	5.9385	0	1.19523	2.88554	11.4489	21.7605	16.7249	26.4311	0	0	0	6.78365	5.9385	1.19523	1.19523	3.90104	2.04038	1.19523	2.04038	4.7462	0	2.88554	12.9726	19.1898	0	0	9.17411
105923	28.9901	16.3321	0	15.4319	25.8444	22.2164	15.4319	18.6983	0	0	0	1.86711	0	0	0	4.44174	0	1.30897	3.51813	16.4904	24.8801	21.8614	33.2451	0	0	0	6.28517	4.44174	1.30897	1.30897	5.45768	2.99408	1.15065	2.99408	7.14279	0	5.49927	16.9904	22.1243	0	0	8.74479
107968	29.7784	15.9401	0	13.8107	26.1666	21.1085	13.8107	17.8619	0	0	0	1.77598	0	0	0	4.50312	0	1.2174	5.64953	15.417	27.827	22.2193	35.5261	0	0	0	7.05052	4.50312	1.2174	1.2174	5.21623	3.62908	1.08169	3.62908	7.62791	0	6.99806	17.0077	21.6103	0	0	9.3496
110385	25.6643	17.4393	0	15.6405	24.1424	20.7627	15.6405	18.9639	0	0	0	0.940374	0	0	0	7.14793	0	0.470187	4.00721	16.4236	22.7423	21.5629	28.3308	0	0	0	8.33634	7.14793	0.470187	0.470187	4.96369	2.20413	1.01572	2.20413	6.69764	0	6.52038	18.6664	20.3285	0	0	9.82225
113173	26.228	15.2487	0	14.4128	22.5509	16.8106	14.4128	15.9747	0	0	0	0.557278	0	0	0	5.02677	0	0	1.67183	13.1635	22.0407	17.3679	26.0633	0	0	0	6.14133	5.02677	0	0	4.56152	3.1997	2.08514	3.1997	7.76122	0	3.57524	14.1682	20.2091	0	0	8.22647
115776	25.6931	16.898	0	15.4411	21.7898	18.4841	15.4411	17.0272	0	0	0	0.560772	0	0	0	7.41576	0	0.560772	2.81075	15.6758	21.5575	18.5592	24.1149	0	0	0	7.97653	7.41576	0.560772	0.560772	4.83149	1.78295	1.22217	1.78295	6.05366	0	3.78204	14.8046	20.0332	0	0	9.75948
118192	27.812	18.6521	0	18.1543	22.6622	21.2989	18.1543	19.1499	0	0	0	1.15639	0	0	0	5.62257	0	0.658563	2.94598	17.2237	22.1644	21.4373	26.2941	0	0	0	7.67159	5.62257	0.658563	0.658563	6.59607	4.30303	2.25401	4.30303	10.2405	0	3.91002	16.3943	22.9024	0	0	10.5842
120609	20.1714	10.8572	0	11.2761	12.993	12.4207	11.2761	10.8572	0	0	0	0.572286	0	0	0	2.32065	0	0.572286	1.71686	10.6571	11.7152	12.2388	14.5279	0	0	0	3.46522	2.32065	0.572286	0.572286	4.68585	2.33588	1.19131	2.33588	6.44944	0	3.38499	9.8192	18.6079	0	0	5.22881
123955	28.4814	13.517	0	14.1154	17.1707	15.0131	14.1154	14.4147	0	0	0	0	0	0	0	5.47276	0	0	1.07881	12.1534	19.0028	17.7428	24.0686	0	0	0	9.94737	5.47276	0	0	3.22257	6.43666	1.96204	6.43666	9.65923	0	1.97643	14.9652	24.3618	0	0	11.9094
126250	30.4272	15.4223	0	13.0854	21.4527	18.6059	13.0854	16.2691	0	0	0	1.9946	0	0	0	4.70944	0	0.826192	4.2312	13.2364	23.2053	18.6059	30.084	0	0	0.584206	9.11339	4.70944	0.826192	0.826192	4.75367	6.58985	2.1859	6.58985	10.5173	0	5.39961	15.6403	25.3177	0	0	12.7097
128375	32.4719	16.9177	0	15.411	23.4879	21.2377	15.411	19.731	0	0	0	1.50668	0	0	0	4.16695	0	0.882592	3.01336	12.439	27.4059	24.2731	35.269	0	0	0	8.42481	4.16695	0.882592	0.882592	3.8264	8.73652	4.47866	8.73652	11.6803	0	3.63744	16.3127	27.0243	0	0	13.7861
129750	28.528	17.2564	0	16.1587	23.4706	22.373	16.1587	20.0079	0	0	0	0	0	0	0	5.33301	0	0	2.19529	14.101	25.1501	23.5886	32.9739	0	0	0	6.60046	5.33301	0	0	4.47547	5.05657	3.78912	5.05657	9.53204	0	3.46273	15.5588	24.8692	0	0	10.3896
132125	28.6694	15.1546	0	14.0241	21.2276	18.7316	14.0241	17.6012	0	0	0	1.54425	0	0	0	5.09329	0	0.979013	4.57056	13.0022	24.6099	22.348	34.7397	0	0	0	7.30574	5.09329	0.979013	0.979013	5.38852	4.36479	2.15234	4.36479	8.7743	0	4.57056	15.1653	22.8781	0	0	10.4371
133875	26.089	17.9866	0	15.2026	26.0768	24.3337	15.2026	19.8699	0	0	0	1.86349	0	0	0	3.01898	0	0.698809	6.06584	17.4682	26.9862	24.5501	37.1368	0	0	0.465873	5.98395	3.01898	0.698809	0.698809	6.99671	4.32321	1.35824	4.32321	10.6211	0	8.3952	19.6525	21.9202	0	0	8.50687
135875	27.4915	24.8268	0	21.3276	33.0801	31.7964	21.3276	25.5319	0	0	0	2.5019	0	0	0	4.49303	0	1.47491	7.31811	22.6425	28.9605	27.4483	38.1332	0	0	0.513496	5.52002	4.49303	1.47491	1.47491	6.32602	4.59385	3.56686	4.59385	9.44496	0	11.3829	18.9959	21.1095	0	0	11.0753
137365	26.0732	24.0611	0	22.2218	29.8961	28.6798	22.2218	23.9528	0	0	0	1.72017	0	0	0	6.15041	0	1.72017	7.24911	22.1039	27.4781	26.2867	33.1651	0	0	0	7.18771	6.15041	1.72017	1.72017	5.82865	4.43832	3.40102	4.43832	8.5468	0	9.77925	17.0012	19.4909	0	0	12.3089
141070	22.8172	23.9207	0	21.5479	28.4579	28.4579	21.5479	19.8797	0	0	0	2.73322	0	0	0	5.3627	0	1.67809	8.95121	24.2084	25.6709	22.7704	31.9498	0	0	0	7.56491	5.3627	1.67809	1.67809	5.96785	5.01718	2.81497	5.01718	9.30694	0	11.9371	15.3524	18.3908	0	0	12.058
143020	22.2925	23.2461	0	21.0969	28.818	27.2622	21.0969	20.3812	0	0	0	3.14383	0	0	0	4.72537	0	2.36592	8.10537	21.6264	26.6328	23.0371	32.6488	0	0	0	5.8255	4.72537	2.36592	2.36592	5.21088	5.08573	3.9856	5.08573	7.93069	0	11.3586	12.796	16.8148	0	0	12.177
148675	25.5229	23.3327	0	17.9307	30.404	27.7415	17.9307	20.3119	0	0	0	3.69082	0	0	0	3.17879	0	2.14358	10.1709	21.15	31.2558	23.9334	36.453	0	0	0	5.78653	3.17879	2.14358	2.14358	5.96865	5.80425	3.19651	5.80425	9.62933	0	12.9407	14.7626	18.5952	0	0	11.1266
151990	23.43	23.9092	0	19.3463	30.8573	29.5214	19.3463	20.3092	0	0	0	2.35452	0	0	0	2.89461	0	1.72474	9.84611	23.666	29.1009	23.1914	34.8059	0	0	0.629785	4.78104	2.89461	1.72474	1.72474	7.03606	4.4543	2.56787	4.4543	9.76562	0	13.1094	14.9226	17.2473	0	0	9.70343
156280	23.1192	22.9583	0	19.5488	31.7803	30.2961	19.5488	21.532	0	0	0	4.03908	0	0	0	3.22586	0	2.28022	10.061	23.4924	27.5859	23.8262	35.983	0	0	0	4.84603	3.22586	2.28022	2.28022	7.38883	3.76344	2.14328	3.76344	8.87206	0	13.5115	17.6163	18.1065	0	0	9.26953
159205	25.0573	23.6321	0	22.2715	31.8245	31.2847	22.2715	25.1878	0	0	0	1.3761	0	0	0	4.78983	0	1.3761	5.43608	22.773	27.5323	27.6954	34.7801	0	0	0.539753	6.58336	4.78983	1.3761	1.3761	5.13505	5.02078	3.22725	5.02078	8.77972	0	9.86764	18.8045	18.854	0	0	11.7265
162715	21.2615	23.7513	0	19.9582	28.8276	28.8276	19.9582	21.5216	0	0	0	3.30758	0	0	0	4.95879	0	2.72849	9.5071	21.6928	25.455	22.4906	30.3809	0	0	0	4.95879	4.95879	2.72849	2.72849	5.77078	3.81497	3.81497	3.81497	6.85726	0	12.2901	13.327	16.3027	0	0	11.5022
167395	20.869	25.6609	0	21.817	27.2474	27.2474	21.817	20.2305	0	0	0	2.42863	0	0	0	6.36223	0	1.81106	8.40449	23.0407	24.3078	20.2305	27.5228	0	0	0.617566	6.36223	6.36223	1.81106	1.81106	4.69451	4.20671	4.20671	4.20671	7.09016	0	11.2036	10.5987	16.0615	0	0	12.9976
171100	20.3917	23.9057	0	21.6903	27.1714	27.1714	21.6903	20.3917	0	0	0	0.818317	0	0	0	5.27797	0	0.818317	5.42735	21.4555	23.6098	20.3917	25.7075	0	0	0	5.27797	5.27797	0.818317	0.818317	4.59796	4.73242	4.73242	4.73242	8.51207	0	7.98618	11.3205	16.0529	0	0	10.8287
174805	23.9601	17.9337	0	18.3032	23.9969	22.1914	18.3032	16.4202	0	0	0	1.96892	0	0	0	3.90575	0	1.96892	5.2257	17.2612	20.9265	17.0138	24.6047	0	0	0	4.69108	3.90575	1.96892	1.96892	4.10936	4.52816	3.74283	4.52816	6.66861	0	6.413	8.61248	17.3044	0	0	10.4028
179412	25.8168	20.8985	0	18.3364	28.6127	26.6054	18.3364	21.3207	0	0	0	2.45811	0	0	0	3.52477	0	1.65521	7.50388	17.5098	26.9554	22.8299	33.2631	0	0	0	4.0925	3.52477	1.65521	1.65521	4.43652	5.31773	4.74999	5.31773	8.09904	0	8.74123	12.4568	18.5602	0	0	10.4977
184664	24.7083	15.7957	0	11.4038	25.8591	24.011	11.4038	18.5719	0	0	0	4.44357	0	0	0	2.71099	0	3.0439	10.3808	14.6636	26.5377	22.637	37.0371	0	0	0	4.67743	2.71099	3.0439	3.0439	7.13979	3.62211	1.65567	3.62211	7.718	0	12.0767	17.4584	20.0901	0	0	9.377
187605	17.9323	17.7486	0	11.4942	22.6278	22.6278	11.4942	16.3733	0	0	0	3.28063	0	0	0	1.33349	0	1.64745	9.41367	16.8057	21.9104	19.5926	32.605	0	0	0	3.6099	1.33349	1.64745	1.64745	6.92851	3.21933	0.942919	3.21933	8.50039	0	13.3504	16.3733	15.2654	0	0	6.20027
189706	26.9617	16.069	0	14.1021	26.1719	22.2845	14.1021	18.2069	0	0	0	3.02225	0	0	0	3.93007	0	2.48088	7.01611	16.583	25.4342	21.1014	35.044	0	0	0.541372	7.30951	3.93007	2.48088	2.48088	7.27439	3.92081	0.541372	3.92081	8.71432	0	9.28494	18.4493	20.1706	0	0	10.8731
193908	26.5638	23.4333	0	20.7599	27.8724	26.0599	20.7599	19.6133	0	0	0	1.64627	0	0	0	4.67666	0	0.906287	6.20623	21.9797	26.2306	21.183	29.6486	0	0	0.73998	6.2464	4.67666	0.906287	0.906287	5.52005	4.90991	3.34017	4.90991	9.52367	0	8.27119	12.9251	20.5735	0	0	11.2328
200000	21.6136	19.1248	0	13.6343	25.4346	22.712	13.6343	13.0651	0	0	0	4.07005	0	0	0	4.34746	0	1.52499	9.31387	19.4264	22.5413	13.7095	25.2897	0	0	0	4.99188	4.34746	1.52499	1.52499	1.52499	2.42098	1.77655	2.42098	2.42098	0	11.4179	7.96045	15.5629	0	0	8.29342
203868	26.4362	21.014	0	18.2146	28.599	26.6084	18.2146	19.7703	0	0	0	2.09208	0	0	0	4.07375	0	0.729325	5.79116	20.4605	26.1893	20.9858	29.521	0	0	0	4.55997	4.07375	0.729325	0.729325	6.17625	3.05903	2.57282	3.05903	8.50596	0	7.15391	14.4585	21.3676	0	0	7.86211
207209	27.3653	15.4234	0	14.504	20.1319	18.2931	14.504	16.0735	0	0	0	1.77616	0	0	0	5.73862	0	1.12604	4.28802	13.6584	20.5301	18.0412	25.0874	0	0	0	8.62572	5.73862	1.12604	1.12604	4.16147	5.30218	2.41508	5.30218	8.33762	0	4.28802	13.8808	21.9424	0	0	12.1668
213890	26.1693	16.0535	0	16.0535	20.9176	19.7614	16.0535	17.4491	0	0	0	1.15615	0	0	0	6.86952	0	0.578073	2.55174	15.1456	20.5915	19.6748	24.4043	0	0	0	7.51582	6.86952	0.578073	0.578073	4.4343	2.71044	2.06413	2.71044	6.56667	0	3.12981	14.5019	22.6662	0	0	10.158
217260	24.9487	17.3794	0	16.3922	20.327	18.238	16.3922	15.5337	0	0	0	1.19668	0	0	0	6.14744	0	0.701	3.04241	16.5692	20.327	17.4603	22.7493	0	0	0.495682	7.21548	6.14744	0.701	0.701	4.52985	2.73676	1.66871	2.73676	6.56561	0	4.60614	12.1124	21.0304	0	0	10.0809
219920	25.5084	16.3525	0	15.0313	18.9794	17.8913	15.0313	16.5701	0	0	0	0	0	0	0	5.29127	0	0	1.5969	13.6197	19.2551	17.8913	23.4502	0	0	0	6.33668	5.29127	0	0	2.78233	3.7782	2.73279	3.7782	6.56053	0	3.16503	11.7032	21.2408	0	0	9.06947
222020	29.185	18.3387	0	16.5069	26.6695	24.6946	16.5069	22.8627	0	0	0	0	0	0	0	4.91367	0	0	1.83184	14.3679	26.6695	24.2537	34.6787	0	0	0	5.72847	4.91367	0	0	4.09432	4.78565	3.97085	4.78565	8.87997	0	2.40799	16.7548	23.4434	0	0	9.69932
224960	25.2686	16.6123	0	16.4628	23.7887	21.4261	16.4628	18.6837	0	0	0	2.02622	0	0	0	4.81797	0	1.49696	3.71007	14.7665	23.5508	20.8007	32.9386	0	0	0	6.53067	4.81797	1.49696	1.49696	6.34045	4.85499	3.14228	4.85499	9.69848	0	4.76858	15.4207	21.0726	0	0	11.1699
225940	25.3292	16.9397	0	14.4489	25.5278	24.1257	14.4489	19.7466	0	0	0	2.85906	0	0	0	1.62563	0	1.94308	6.02627	16.8345	25.1088	22.9575	36.1887	0	0	0.457989	5.08135	1.62563	1.94308	1.94308	7.74979	4.5051	1.04938	4.5051	10.3118	0	8.94106	18.8997	20.6738	0	0	8.5318
228180	28.9905	20.1696	0	17.5089	27.6574	26.7351	17.5089	22.477	0	0	0	3.01382	0	0	0	3.55314	0	1.63039	7.24525	18.2794	27.2764	27.0311	37.5603	0	0	0.652155	6.73233	3.55314	1.63039	1.63039	7.33441	5.86809	2.6889	5.86809	11.5721	0	9.5648	20.3317	24.538	0	0	11.7038
230140	27.476	25.4694	0	22.137	31.8074	31.3135	22.137	25.6647	0	0	0	2.12499	0	0	0	6.05716	0	0.890327	5.38088	23.5932	28.421	27.4454	36.3262	0	0	0.740797	7.83782	6.05716	0.890327	0.890327	6.24369	4.81501	3.03436	4.81501	10.1684	0	8.97227	20.7277	23.3752	0	0	12.5033
232100	23.5354	21.5388	0	23.2016	26.2004	24.6084	23.2016	20.132	0	0	0	1.00929	0	0	0	6.82747	0	0	2.23089	21.1365	23.7135	21.2974	24.8789	0	0	0.582717	7.41019	6.82747	0	0	3.42268	4.05465	3.47193	4.05465	7.47734	0	3.39632	11.4156	17.7082	0	0	11.4648
233220	25.0891	20.5473	0	21.3722	25.5582	25.0231	21.3722	19.3823	0	0	0	1.24296	0	0	0	5.35149	0	0.707866	3.65089	20.683	22.8605	21.3399	26.3893	0	0	0	7.84414	5.35149	0.707866	0.707866	5.47142	5.58974	3.09709	5.58974	10.3533	0	4.53825	14.738	20.5141	0	0	11.6491
233920	22.7214	15.1385	0	14.2489	17.2862	16.4928	14.2489	14.0165	0	0	0	1.12199	0	0	0	6.15618	0	0.560993	2.24397	15.3709	17.2862	14.8099	18.0796	0	0	0	6.94955	6.15618	0.560993	0.560993	4.96934	1.35436	0.560993	1.35436	5.7627	0	2.24397	11.9189	19.5981	0	0	8.07153
235040	22.3097	15.1357	0	13.9926	16.8372	15.8405	13.9926	13.2879	0	0	0	0.498342	0	0	0	4.92831	0	0	2.71101	14.5863	17.0436	14.6974	18.745	0	0	0	5.63307	4.92831	0	0	3.77338	1.95889	1.25413	1.95889	5.73228	0	3.20935	9.90479	18.9776	0	0	6.8872
238152	22.5396	16.251	0	14.8932	18.3725	17.9123	14.8932	14.6382	0	0	0	1.65722	0	0	0	4.50988	0	1.06299	4.33708	16.1462	17.3342	15.4785	19.8784	0	0	0	4.97016	4.50988	1.06299	1.06299	6.09817	1.52328	1.06299	1.52328	6.55846	0	5.25765	11.629	19.6729	0	0	7.09614
239880	24.3715	11.6276	0	11.6276	15.1473	14.612	11.6276	13.3758	0	0	0	0.618097	0	0	0	5.86655	0	0.618097	2.6183	10.525	16.3835	15.8482	19.2851	0	0	0	7.63803	5.86655	0.618097	0.618097	1.49222	3.49219	1.72071	3.49219	4.36631	0	3.2364	11.4966	21.9062	0	0	9.97684
241608	27.6818	17.6146	0	16.8575	22.0965	22.0965	16.8575	20.1142	0	0	0	0.612564	0	0	0	6.90336	0	0.612564	2.84859	15.7015	23.606	22.8488	29.6386	0	0	0.612564	8.57691	6.90336	0.612564	0.612564	2.90457	4.19922	2.52567	4.19922	6.49123	0	4.07372	15.3508	24.3831	0	0	12.3277
243720	26.6201	16.7578	0	16.1367	24.5719	24.5719	16.1367	21.9384	0	0	0	1.62726	0	0	0	5.75168	0	1.62726	4.78306	15.771	25.0615	25.3398	32.412	0	0	0	7.5887	5.75168	1.62726	1.62726	5.35056	3.83	1.99298	3.83	7.55329	0	5.5724	18.9093	22.6306	0	0	11.2089
245448	26.2159	16.1245	0	13.6952	23.5417	22.4353	13.6952	20.006	0	0	0	1.55053	0	0	0	4.69235	0	0.997319	5.13168	14.7414	25.7381	24.5354	36.0201	0	0	0	8.43933	4.69235	0.997319	0.997319	5.56847	5.13	1.38303	5.13	9.70116	0	6.68221	20.3186	22.829	0	0	10.8197
249096	24.5615	15.6716	0	14.8442	23.4325	22.9195	14.8442	19.686	0	0	0	1.57054	0	0	0	4.40183	0	1.05755	4.86503	15.1927	24.1804	22.9195	31.5593	0	0	0	5.6049	4.40183	1.05755	1.05755	6.12941	2.88501	1.68195	2.88501	7.95687	0	6.14751	18.004	23.3584	0	0	8.3444
251400	27.7494	17.3162	0	16.6279	24.6106	24.6106	16.6279	21.5407	0	0	0	1.6874	0	0	0	2.81524	0	1.1908	4.15217	16.024	23.97	25.279	32.9242	0	0	0	5.20493	2.81524	1.1908	1.1908	7.09279	4.87268	2.48299	4.87268	10.7747	0	5.76133	18.8196	23.5427	0	0	8.87872
252360	27.1447	21.2566	0	20.0932	28.4435	28.4435	20.0932	24.0041	0	0	0	1.47142	0	0	0	5.02071	0	0.932843	4.74265	19.5528	26.9542	27.0744	35.2495	0	0	0.538577	6.54403	5.02071	0.932843	0.932843	5.35771	4.86511	3.34178	4.86511	9.28997	0	8.20281	18.9008	23.8599	0	0	11.3572
256968	24.4511	16.5252	0	17.4036	23.0564	23.0564	17.4036	19.2167	0	0	0	1.19724	0	0	0	4.64833	0	1.19724	3.72482	16.1758	19.8262	19.7975	25.4252	0	0	0	5.22907	4.64833	1.19724	1.19724	4.17269	3.28918	2.70843	3.28918	6.26462	0	4.59594	13.2478	20.0291	0	0	9.13475
260040	24.0421	19.9123	0	18.9116	28.1475	28.1475	18.9116	21.7731	0	0	0	2.19702	0	0	0	2.28175	0	1.35437	6.23363	20.7307	26.1553	24.7699	33.1617	0	0	0.486504	3.6109	2.28175	1.35437	1.35437	6.72799	3.19761	1.86846	3.19761	8.57122	0	8.53579	16.3485	19.1568	0	0	7.32023
261384	22.4484	18.5864	0	16.4875	27.3967	27.3967	16.4875	21.4395	0	0	0	2.32244	0	0	0	1.45037	0	1.85795	7.47821	19.3313	24.5748	23.5866	32.1749	0	0	0	2.1471	1.45037	1.85795	1.85795	7.47039	1.88095	1.18422	1.88095	7.49339	0	9.68065	16.8432	17.5022	0	0	5.18927
265416	25.5691	20.8552	0	18.8538	28.19	28.19	18.8538	23.49	0	0	0	2.51211	0	0	0	4.75679	0	2.51211	8.72492	19.3002	25.523	26.3476	33.8912	0	0	0	5.74212	4.75679	2.51211	2.51211	6.93238	3.88954	2.90422	3.88954	8.30982	0	11.1514	18.5744	20.8237	0	0	11.1584
268488	21.893	22.0152	0	20.5706	28.4531	28.4531	20.5706	22.3016	0	0	0	1.78275	0	0	0	6.5705	0	1.23185	4.85483	21.9516	23.4875	22.8525	29.163	0	0	0	7.1214	6.5705	1.23185	1.23185	5.22349	2.96796	2.41706	2.96796	6.95961	0	7.8703	17.2588	17.6146	0	0	10.7703
271944	24.7263	22.5176	0	21.0421	29.8532	28.7628	21.0421	22.3381	0	0	0	2.74778	0	0	0	3.72988	0	1.29023	6.15263	21.4169	27.6136	23.9737	32.5213	0	0	0.54522	4.82032	3.72988	1.29023	1.29023	6.84506	4.66569	3.57525	4.66569	10.2205	0	8.09855	15.5464	20.4195	0	0	10.231
275784	24.8886	21.5316	0	23.4807	28.9809	28.9809	23.4807	23.5103	0	0	0	0.846162	0	0	0	4.68055	0	0.846162	3.62388	21.0389	25.6324	26.2196	30.8738	0	0	0.564108	5.80877	4.68055	0.846162	0.846162	4.74423	5.33073	4.20251	5.33073	9.22879	0	6.53597	15.7943	20.811	0	0	11.4215
277320	18.6202	17.5938	0	19.6745	23.544	23.544	19.6745	17.5938	0	0	0	0	0	0	0	4.75515	0	0	1.93473	17.4731	19.1143	18.8242	22.1996	0	0	0	5.37037	4.75515	0	0	1.16731	4.75144	4.13621	4.75144	5.91874	0	3.57943	9.50188	13.434	0	0	9.50659
279240	20.951	19.7631	0	22.0567	24.8159	24.8159	22.0567	19.7631	0	0	0	0.593914	0	0	0	3.849	0	0	2.16526	18.8072	21.3456	20.951	24.4655	0	0	0	3.849	3.849	0	0	3.23942	4.6291	4.6291	4.6291	7.86852	0	3.15016	9.4529	15.2698	0	0	8.4781
282696	23.0186	18.4285	0	18.7367	24.0711	23.2175	18.7367	17.9496	0	0	0	1.48995	0	0	0	3.64173	0	0.853666	4.39821	18.9401	19.7931	17.9496	22.1367	0	0	0	3.64173	3.64173	0.853666	0.853666	4.60721	2.27644	2.27644	2.27644	6.02998	0	5.88816	10.8862	17.378	0	0	6.77183
284808	25.1051	12.8563	0	13.844	19.567	17.5092	13.844	14.0608	0	0	0	1.72417	0	0	0	4.68863	0	1.10901	3.26209	13.1535	19.8097	16.5215	22.1751	0	0	0	5.61138	4.68863	1.10901	1.10901	2.5517	2.84361	1.92086	2.84361	4.2863	0	3.26209	9.48893	20.0887	0	0	8.64124
287764	27.7818	15.7715	0	12.6109	24.6043	21.8968	12.6109	18.7362	0	0	0	2.56339	0	0	0	4.84338	0	2.01498	6.56849	14.1493	26.7808	22.7503	34.2643	0	0	0	7.33071	4.84338	2.01498	2.01498	4.91689	4.10954	1.62221	4.10954	7.01144	0	8.29393	17.1335	22.0929	0	0	10.9679
291757	26.6821	14.8501	0	13.8966	24.7615	24.2831	13.8966	21.0355	0	0	0	2.23599	0	0	0	2.25806	0	1.75762	5.00528	14.9546	24.2696	24.6814	32.7764	0	0	0	4.57228	2.25806	1.75762	1.75762	7.69879	3.35679	1.04257	3.35679	9.29796	0	6.52622	20.3203	22.7472	0	0	7.37247
295750	28.4672	14.7651	0	14.0538	22.6814	22.6814	14.0538	19.9701	0	0	0	1.71131	0	0	0	3.64213	0	1.71131	4.70435	14.1394	23.0916	24.1118	31.2571	0	0	0	5.97125	3.64213	1.71131	1.71131	6.14333	3.95481	1.62569	3.95481	8.38683	0	5.83825	18.4535	24.6496	0	0	9.30824
300971	23.9719	19.1624	0	20.3721	24.5521	24.5521	20.3721	19.6613	0	0	0	0.968624	0	0	0	3.86101	0	0.968624	3.36846	19.6196	22.5516	22.0611	27.2098	0	0	0	4.42025	3.86101	0.968624	0.968624	5.25508	3.1523	2.59307	3.1523	7.43876	0	4.71858	12.3963	18.7407	0	0	7.98194
305271	23.9174	18.7799	0	19.791	24.4516	23.427	19.791	18.3763	0	0	0	1.42818	0	0	0	5.09629	0	0.591571	3.20289	19.8712	20.9877	18.9679	23.787	0	0	0	5.09629	5.09629	0.591571	0.591571	3.84521	1.9396	1.9396	1.9396	5.19324	0	4.22752	10.9908	17.4467	0	0	7.62745
308650	23.6947	12.1878	0	13.0948	19.9507	18.7798	13.0948	15.4541	0	0	0	1.20935	0	0	0	3.10685	0	0.604674	2.4187	13.3014	17.4249	16.254	22.3024	0	0	0	3.10685	3.10685	0.604674	0.604674	3.40843	1.00274	1.00274	1.00274	3.8065	0	3.02337	10.9909	18.4586	0	0	4.71426
310493	24.1975	16.7334	0	19.9912	24.1384	22.3559	19.9912	17.9336	0	0	0	1.16445	0	0	0	4.03887	0	0.582223	2.03778	18.6644	19.8924	18.9833	23.0946	0	0	0.582223	4.03887	4.03887	0.582223	0.582223	4.13569	1.90894	1.90894	1.90894	5.46241	0	4.07556	10.8304	18.3851	0	0	7.11226
315714	25.4333	12.9777	0	14.8648	22.2862	20.293	14.8648	17.1607	0	0	0	1.07833	0	0	0	4.69742	0	1.07833	2.32347	13.8402	20.2323	18.2391	23.9935	0	0	0	4.69742	4.69742	1.07833	1.07833	2.60331	1.64717	1.64717	1.64717	3.17216	0	2.94605	11.6506	19.5772	0	0	7.42292
322164	27.6289	13.2253	0	15.9175	24.2162	22.1445	15.9175	18.2435	0	0	0	0.604398	0	0	0	3.24773	0	0.604398	1.2088	15.0109	22.8443	21.553	26.86	0	0	0	4.45652	3.24773	0.604398	0.604398	3.45534	2.71979	1.51099	2.71979	5.57073	0	2.59365	14.3149	21.9308	0	0	6.57192
328183	23.867	13.148	0	13.425	18.0843	16.0941	13.425	12.8975	0	0	0	1.45981	0	0	0	4.89329	0	0.855138	1.71028	13.7947	18.3069	15.4616	20.8568	0	0	0	6.85265	4.89329	0.855138	0.855138	2.99298	3.04946	1.09009	3.04946	5.18731	0	2.91962	10.8045	19.5193	0	0	8.79788
329833	27.9796	12.5671	0	12.767	20.7712	19.0281	12.767	16.7257	0	0	0	0	0	0	0	4.11618	0	0	1.65807	11.6725	20.8075	20.0852	28.6596	0	0	0	7.51303	4.11618	0	0	1.94302	5.54256	2.14571	5.54256	7.48558	0	3.12325	16.1311	23.7837	0	0	9.65874
332125	28.0999	11.8813	0	11.3862	24.0091	21.0519	11.3862	19.3236	0	0	0	1.11164	0	0	0	4.95533	0	1.11164	3.49449	10.8376	24.2646	21.9239	32.3916	0	0	0	7.48769	4.95533	1.11164	1.11164	2.38285	4.19268	1.66032	4.19268	5.46388	0	4.60613	18.4246	22.7549	0	0	10.2596
334508	27.3114	11.2009	0	9.25087	22.3379	20.8259	9.25087	18.8758	0	0	0	1.39553	0	0	0	4.08273	0	1.39553	4.85758	11.2009	25.0654	23.6948	32.4421	0	0	0	6.45848	4.08273	1.39553	1.39553	4.7133	2.37575	0	2.37575	5.69352	0	6.12596	20.6696	24.3944	0	0	7.854
335700	24.4121	8.60326	0	7.50663	19.4953	18.887	7.50663	17.7904	0	0	0	1.09663	0	0	0	3.08451	0	1.09663	3.28988	8.60326	23.1269	22.6761	29.604	0	0	0	5.66392	3.08451	1.09663	1.09663	3.35226	2.57941	0	2.57941	4.83505	0	4.54392	19.4574	22.8914	0	0	6.76055
337808	22.6542	7.73717	0	6.27131	18.8992	18.8992	6.27131	17.4333	0	0	0	1.18531	0	0	0	0.862439	0	1.18531	3.99957	7.73717	19.399	21.468	25.5371	0	0	0	2.43703	0.862439	1.18531	1.18531	4.67082	1.57459	0	1.57459	5.0601	0	5.92293	19.0079	21.0427	0	0	3.62234
340008	20.7734	12.1283	0	10.4225	19.761	19.761	10.4225	18.0551	0	0	0	1.20537	0	0	0	0.837498	0	1.20537	3.41173	12.1283	21.6417	22.3241	29.445	0	0	0	2.04581	0.837498	1.20537	1.20537	7.95378	1.20832	0	1.20832	7.95673	0	4.96248	17.9776	18.6501	0	0	3.25118
341750	24.305	15.0265	0	13.8089	23.7827	23.7827	13.8089	20.7639	0	0	0	2.03919	0	0	0	2.91068	0	1.53966	4.36431	15.2206	23.6347	24.384	32.5515	0	0	0	3.41022	2.91068	1.53966	1.53966	7.22972	1.20598	0.706445	1.20598	6.89604	0	5.98297	18.5745	21.0737	0	0	5.65632
342667	24.7996	23.5066	0	22.9651	30.2588	30.2588	22.9651	24.3346	0	0	0	1.32053	0	0	0	4.30241	0	1.32053	5.10326	22.2026	27.5146	27.2152	32.914	0	0	0.517954	5.5973	4.30241	1.32053	1.32053	6.22744	5.29019	3.9953	5.29019	10.1971	0	8.55474	16.9807	20.1462	0	0	11.4311
344317	25.2592	23.3461	0	22.574	31.2384	29.9471	22.574	26.056	0	0	0	0.534905	0	0	0	5.42758	0	0	4.22277	20.8056	26.2665	27.7892	34.7041	0	0	0	5.42758	5.42758	0	0	4.24567	4.09997	4.09997	4.09997	8.34564	0	8.26575	18.7577	20.2017	0	0	9.52755
345508	23.9779	22.2101	0	22.9202	29.7075	29.7075	22.9202	23.4252	0	0	0	1.38294	0	0	0	4.91932	0	0.810108	4.40631	22.5427	25.1437	24.5709	29.4948	0	0	0.572833	5.49216	4.91932	0.810108	0.810108	4.53352	3.73641	3.16357	3.73641	7.45982	0	6.38229	14.6199	17.526	0	0	10.0387
347342	21.3178	19.7225	0	20.5756	27.2947	26.7103	20.5756	19.5284	0	0	0	1.6381	0	0	0	3.69088	0	1.05364	4.4601	21.5727	22.6928	20.1129	26.1202	0	0	0	3.69088	3.69088	1.05364	1.05364	4.49896	2.16722	2.16722	2.16722	5.61253	0	5.62901	10.691	13.4786	0	0	6.91174
348900	25.5258	20.1912	0	20.3474	27.8846	26.9943	20.3474	22.0622	0	0	0	1.87101	0	0	0	4.8294	0	1.87101	6.6835	20.8643	26.1589	25.058	31.0883	0	0	0	6.07031	4.8294	1.87101	1.87101	6.58894	3.11192	1.87101	3.11192	7.82986	0	7.83285	16.1965	18.372	0	0	9.81232
356300	22.8702	21.0396	0	20.888	27.4279	27.4279	20.888	21.5732	0	0	0	2.84704	0	0	0	4.01717	0	2.3129	5.85025	20.7766	24.2709	23.4691	30.147	0	0	0	4.01717	4.01717	2.3129	2.3129	6.74981	3.11455	3.11455	3.11455	7.55146	0	6.98333	13.1239	16.4671	0	0	9.44462
357613	23.2446	19.4351	0	21.7502	26.6841	26.6841	21.7502	21.6932	0	0	0	1.33794	0	0	0	4.77185	0	1.33794	4.26407	19.9764	22.8018	23.1754	27.3459	0	0	0	4.77185	4.77185	1.33794	1.33794	4.78461	3.1117	3.1117	3.1117	6.55837	0	5.40507	12.9555	17.0481	0	0	9.22148
363388	19.4805	17.763	0	20.3726	25.1742	23.6549	20.3726	17.8874	0	0	0	1.21547	0	0	0	5.64411	0	0.607737	2.18668	19.9359	20.3779	17.8874	21.8973	0	0	0	5.64411	5.64411	0.607737	0.607737	2.73482	2.01564	2.01564	2.01564	4.14272	0	2.79442	10.0823	12.7794	0	0	8.26748
368638	27.3274	21.0208	0	20.2378	31.7568	29.2282	20.2378	23.6496	0	0	0	2.50873	0	0	0	5.99852	0	1.39374	4.57452	20.7017	28.7542	25.9139	35.764	0	0	0	6.55602	5.99852	1.39374	1.39374	5.27624	3.27439	2.71689	3.27439	7.15689	0	6.88604	17.7712	20.2915	0	0	10.6666
373363	27.6418	15.2607	0	15.108	24.9028	22.7339	15.108	20.4529	0	0	0	2.00174	0	0	0	7.54013	0	2.00174	4.28278	15.4901	25.3766	23.1715	31.2478	0	0	0	8.60427	7.54013	2.00174	2.00174	4.83263	1.89893	0.834784	1.89893	4.72982	0	4.87306	18.4345	22.6349	0	0	11.4408
376513	26.1624	12.659	0	15.2575	24.5838	23.9797	15.2575	21.3812	0	0	0	1.83737	0	0	0	5.23436	0	1.83737	2.44149	13.8732	22.8397	23.4438	28.2733	0	0	0	5.83849	5.23436	1.83737	1.83737	4.63856	1.98834	1.38422	1.98834	4.78954	0	2.44149	17.3619	21.1108	0	0	9.06007
384913	25.9175	13.0758	0	13.3516	25.3807	22.2374	13.3516	19.926	0	0	0	2.11238	0	0	0	2.73291	0	2.11238	3.97699	13.0758	23.6339	21.0551	28.8421	0	0	0	3.29747	2.73291	2.11238	2.11238	6.03392	1.85812	1.29356	1.85812	5.77966	0	4.99476	16.1048	19.1174	0	0	6.70341
389900	28.7182	16.7211	0	14.8823	26.7438	24.0582	14.8823	19.872	0	0	0	1.74307	0	0	0	5.87264	0	1.17373	4.79066	16.4715	25.8482	21.7458	30.5086	0	0	0	7.7465	5.87264	1.17373	1.17373	4.83038	3.29722	1.42335	3.29722	6.95388	0	5.92934	18.1359	22.8196	0	0	10.3436
397513	28.2562	19.0828	0	16.7732	25.4256	23.1689	16.7732	20.8593	0	0	0	1.02515	0	0	0	6.89452	0	1.02515	3.57029	17.1544	23.9836	23.0363	29.6132	0	0	0	8.26736	6.89452	1.02515	1.02515	4.85035	3.30123	1.92839	3.30123	7.12643	0	6.73287	18.7726	23.4432	0	0	11.2209
399875	24.7153	11.8462	0	11.233	17.6337	14.5527	11.233	13.9396	0	0	0	0.86711	0	0	0	7.13934	0	0.86711	2.09339	10.3759	17.8877	14.8067	19.3679	0	0	0	7.13934	7.13934	0.86711	0.86711	2.87742	1.47026	1.47026	1.47026	3.48057	0	2.09339	11.8562	20.408	0	0	9.4767
409325	26.749	9.75409	0	9.46994	16.0686	14.3653	9.46994	13.0038	0	0	0	0.82279	0	0	0	3.88411	0	0.82279	2.18422	9.30931	19.8584	19.1531	31.3992	0	0	0	13.9319	3.88411	0.82279	0.82279	2.21356	11.0312	0.983422	11.0312	12.422	0	3.46645	20.6774	23.1163	0	0	15.7381
412213	25.2871	11.0184	0	9.38071	16.3378	14.3083	9.38071	12.6706	0	0	0	0.618984	0	0	0	6.58502	0	0.618984	2.59584	10.1996	17.6798	15.6504	30.0395	0	0	0	15.0111	6.58502	0.618984	0.618984	1.777	9.24492	0.818839	9.24492	10.4029	0	4.23352	20.2779	22.4388	0	0	16.4489
416857	27.2533	10.6788	0	10.6788	18.6425	15.8882	10.6788	15.8882	0	0	0	0	0	0	0	5.07333	0	0	0.887794	9.63775	18.8333	18.5502	30.4649	0	0	0	14.272	5.07333	0	0	1.50533	10.2397	1.04103	10.2397	11.745	0	2.73122	22.8302	22.6556	0	0	15.3131
423978	24.8691	12.8787	0	12.2618	23.6141	23.6141	12.2618	21.7633	0	0	0	1.11217	0	0	0	1.88873	0	1.11217	2.96293	11.697	22.7047	24.7642	31.3121	0	0	0	4.41444	1.88873	1.11217	1.11217	4.51922	4.32432	1.79861	4.32432	7.73137	0	5.14407	20.1211	21.3876	0	0	7.32522
425758	22.4508	17.4028	0	15.1734	23.0417	23.0417	15.1734	20.8123	0	0	0	2.75882	0	0	0	6.22376	0	2.06497	5.99393	16.118	23.0051	23.7356	31.2864	0	0	0	7.99891	6.22376	2.06497	2.06497	6.92193	3.05991	1.28476	3.05991	7.91687	0	7.97254	20.4734	20.6402	0	0	11.3486
429319	21.259	21.9925	0	23.6089	27.5231	27.5231	23.6089	22.4754	0	0	0	1.28904	0	0	0	6.0591	0	1.28904	3.82915	21.6476	22.425	23.0251	28.1464	0	0	0	6.60875	6.0591	1.28904	1.28904	5.74595	4.22656	3.67691	4.22656	8.68347	0	6.14487	15.58	17.4908	0	0	11.5747
431692	25.1261	24.5673	0	22.8701	30.3997	29.8807	22.8701	24.9842	0	0	0	2.73965	0	0	0	8.12994	0	1.70165	6.61937	23.4952	27.4873	27.3517	33.5245	0	0	0	9.19988	8.12994	1.70165	1.70165	6.08251	3.74166	2.67171	3.74166	8.12252	0	9.88291	20.039	20.8471	0	0	13.5732
437033	22.9476	23.6757	0	23.7705	28.9496	28.9496	23.7705	23.5671	0	0	0	0.550482	0	0	0	5.93142	0	0.550482	2.3686	22.3785	25.041	25.5588	29.7455	0	0	0	7.3726	5.93142	0.550482	0.550482	4.89371	5.477	4.03582	5.477	9.82023	0	5.80549	16.8623	18.2869	0	0	11.9589
440000	17.9441	21.3547	0	23.3464	25.1616	25.1616	23.3464	19.5394	0	0	0	0.67651	0	0	0	3.74634	0	0.67651	2.49176	21.0281	19.7593	20.6782	24.8967	0	0	0	3.74634	3.74634	0.67651	0.67651	5.31443	4.13354	4.13354	4.13354	8.77146	0	5.22584	11.1183	13.6565	0	0	8.5564

## Sheet: Lake Biwa
Age	tundra	boreal forest	temperate forest	warm-temperate forest
454	8.85793	16.3218	29.6288	34.5432
1134	6.32283	11.1976	26.4167	33.2217
1864	6.94721	12.9918	32.9389	37.3649
2495	7.3853	11.5204	25.4716	32.1659
3203	7.21025	22.4743	32.7847	31.6448
3544	13.0911	23.736	34.5204	33.8835
13749	12.5934	23.7413	31.535	30.8321
17114	9.01729	26.2346	29.2125	28.0662
20058	11.8931	25.3778	32.7905	31.1482
22792	8.50589	24.3138	32.1317	29.9824
27292	13.6583	24.7959	38.4511	36.4737
31699	12.1875	25.0891	40.1454	38.8599
38398	11.1446	26.3743	39.1898	38.368
42982	9.96484	24.4088	37.7097	36.1122
45802	8.34007	25.0087	37.7536	36.4434
53207	8.94971	20.0873	36.715	36.1848
55322	12.5341	23.3978	39.7934	38.7717
61669	10.7878	27.4985	37.9371	35.0501
67134	11.3962	27.8695	36.2546	34.5334
69426	8.77456	26.2819	33.3785	31.1815
74362	7.36565	26.0186	32.1607	30.6073
76653	5.72488	21.2635	28.04	26.9326
84358	7.64428	22.1105	35.5798	34.1193
86970	6.86695	18.0121	37.2122	37.6262
89269	7.93386	21.4391	36.3734	36.5832
92821	5.6112	21.7671	35.9373	36.4998
95955	2.95145	18.5258	25.4118	25.4118
97000	2.14084	15.9023	27.0007	27.8032
100532	4.56947	19.3828	32.0278	31.4278
102577	2.88554	17.9136	31.7006	31.7006
105923	5.49927	22.2858	38.3616	37.8898
107968	6.99806	19.5581	38.3542	38.5856
110385	6.52038	20.6742	31.5657	31.0955
113173	3.57524	20.2719	30.5292	31.0865
115776	3.78204	21.6974	28.9143	28.9143
118192	3.91002	24.368	30.925	30.6866
120609	3.38499	20.3045	23.403	22.9841
123955	1.97643	20.9515	28.2622	30.3063
126250	5.39961	21.1612	32.0032	36.4071
128375	3.63744	20.1152	34.2087	37.5839
129750	3.46273	21.7318	35.9194	36.5531
132125	4.57056	18.1321	34.7823	36.8876
133875	8.3952	19.5253	37.7151	37.8356
135875	11.3829	27.4931	40.2861	38.6908
137365	9.77925	26.6052	35.7091	34.2653
141070	11.9371	28.6215	36.1388	33.5479
143020	11.3586	26.5647	35.9675	33.6016
148675	12.9407	25.2331	37.8616	37.3396
151990	13.1094	26.6792	37.5759	34.4799

## Sheet: Lake Suigetsu
Composite depth (correlation model: version 19 Jan. 2007)	Age	tundra	boreal forest	temperate forest	warm-temperate forest
50	-2408.35	8.85172	5.36889	5.36889	32.3867
100	-1756.1	13.4091	7.37485	7.37485	29.2396
149	-1116.89	10.8858	5.46439	5.46439	32.982
200	-451.6	6.5768	5.44361	5.44361	33.9191
251.99	226.61	6.44682	4.78993	4.78993	34.5696
300.03	853.291	5.37906	4.12883	4.12883	35.9963
350	1505.15	4.27366	4.10017	4.10017	32.1842
400.01	2157.53	6.08863	5.21071	5.21071	35.9934
450	2809.65	7.24338	6.4952	6.4952	36.5794
499.98	3461.64	2.81048	2.81048	2.81048	33.4999
550	4114.15	3.59533	3.11365	3.11365	36.6772
599.97	4766.01	4.68549	3.66048	3.66048	37.4705
650.38	5423.61	4.25202	3.48912	3.48912	34.5576
700	6070.9	3.01066	3.19591	3.19591	35.7512
750	6723.15	3.94784	3.00416	3.00416	33.7448
800.1	7376.7	2.73694	2.06038	2.06038	35.7876
850.33	8031.95	4.0619	4.13462	4.13462	37.423
901	8692.94
950	9332.15	3.35816	3.18636	3.18636	35.1398
999.8	9981.79
1053.72	10685.2	5.38336	3.97439	3.97439	36.9827
1100.9	11300.6
1149.7	11937.2	4.89411	2.89559	2.89559	34.9508
1200	12593.4
1250.96	13258.2	7.15675	4.69054	4.69054	35.8904
1299.85	13895.9
1350.2	14552.8	4.60219	2.16982	2.16982	34.6657
1400	15202.4
1449.97	15854.3	6.31203	3.14645	3.14645	30.6882
1500	16506.9
1550	17159.2	7.11715	2.97015	2.97015	33.3081
1600	17811.4
1650.39	18468.7	8.50097	5.47724	5.47724	31.6541
1700	19115.9
1750	19768.2	13.2886	10.6738	10.6738	33.8626
1799.7	20416.5
1849.5	21066.1	18.8953	17.0249	17.0249	32.2262
1900	21724.9
1950.5	22383.7	15.7371	13.6946	13.6946	34.1997
2000	23029.4
2049.98	23681.4	12.9288	10.8097	10.8097	31.305
2100	24333.9
2150	24986.2	16.7864	14.3823	14.3823	35.7029
2199	25625.4
2250	26290.7	14.4534	11.627	11.627	26.5584
2300	26942.9
2350	27595.2	18.1615	14.4215	14.4215	32.8437
2395	28182.2
2450	28899.7	15.812	12.1688	12.1688	28.6477
2502.6	29585.8
2551.7	30226.3	18.594	14.666	14.666	35.1631
2651.5	31528.2
2700.7	32170	10.1917	6.19458	6.19458	32.4095
2750	32813.2
2799.8	33462.8	7.39779	4.63461	4.63461	31.5129
2850	34117.7
2900.3	34773.8	9.13238	7.73237	7.73237	35.3411
2950	35422.2
2999.6	36069.2	15.3829	11.3263	11.3263	37.2826
3050.04	36727.2
3108.6	37491.1	18.4892	11.483	11.483	33.7925
3150.01	38031.3
3200	38683.4	16.1929	9.17366	9.17366	32.7447
3250.5	39342.2
3301	40000.9	16.2466	9.62666	9.62666	34.6671
3350	40640.2
3401.33	41309.7	16.7596	10.2432	10.2432	36.4462
3450	41944.7
3500	42596.9	15.3524	9.50751	9.50751	36.9351
3550	43249.2
3600	43901.4	15.0911	9.13901	9.13901	35.4338
3650	44553.7	13.3138	6.79577	6.79577	33.1217
3700	45205.9
3750	45858.2
3800	46510.4	14.7722	7.91265	7.91265	31.0344				32490
3850	51650.2
3900	53079.8
3950	54509.4	14.2396	8.46661	8.46661	34.1485
4000	55939
4045.3	57234.2
4100	58798.2	5.06366	3.02094	3.02094	32.2391
4150	60227.8
4198.32	61609.4
4250	63087	15.3272	11.0751	11.0751	34.5668
4300	64516.6
4350	65946.2
4400	67375.8	12.2465	9.15069	9.15069	33.5797
4450	68805.4
4500	70235
4550	71664.6	4.7223	3.47301	3.47301	28.655
4600	73094.2
4650	74523.8
4700	75953.4	5.74718	5.44179	5.44179	34.0537
4750	77383
4799.3	78792.6
4850	80242.2	4.31804	2.58417	2.58417	34.5503
4900	81671.8
4950	83101.4
5000	84531	5.4772	4.14827	4.14827	35.6436
5050	85960.6
5100	87390.2
5150	88819.8	5.61587	4.71512	4.71512	27.9771
5200	90249.4
5250	91679
5300	93108.6	3.20999	2.99851	2.99851	27.7733
5355	94681.2
5403	96053.6
5450	97397.4	3.60816	2.97015	2.97015	34.1438
5500	98827
5550	100257
5600	101686	2.54643	2.13852	2.13852	31.8261
5650	103116
5700	104545
5750	105975	6.37644	4.2361	4.2361	32.4071
5800	107405
5850	108834
5900	110264	5.95133	5.24575	5.24575	32.4453
5950	111693
6000	113123
6050	114553	3.38453	3.11936	3.11936	29.7571
6100	115982
6150	117412
6200	118841	4.02616	5.13989	5.13989	34.2091
6250	120271
6300	121701
6350	123130	2.8083	4.0794	4.0794	35.556
6400	124560
6450	125989
6500	127419	3.46567	4.29504	4.29504	37.1189
6550	128849
6599.98	130278
6650	131708	6.2768	5.59951	5.59951	33.7057
6699.99	133137
6742.3	134347
6800	135997	12.8923	5.83643	5.83643	27.5337
6850	137426
6900	138856
6950	140285	13.9702	8.08759	8.08759	29.8659
7000	141715
7050	143145
7099.96	144573	18.4982	12.0472	12.0472	23.3219
7149.8	145998
7200.4	147445
7250	148863	13.5811	10.1563	10.1563	32.8414
7300	150293	19.686	9.27766	9.27766	20.8992
