# Supplementary material for: Terrestrial biosphere changes over the last 120 kyr
Source: Copernicus journal article supplement (doi:10.5194/cp-12-51-2016), 2016-01-18
Supplement: Supplementary file 1 [file cp-12-51-2016-supplement.zip › supplement/Australasia/JapanTakaharaetal1999.xls]

## Sheet: Lake Biwa
		Plant fucntional type																								MEGA BIOMES
		Arctic/alpine dwarf shrub	Arctic/Alpine forb	Arctic/Alpine fern or fern ally	Boreal evergreen conifer	Boreal forb	Boreal summergreen	Boreal summergreen conifer	Upper cool-temperate conifer	Intermediate-temperate conifer	Euthermic conifer	grass	heath	sedge	temperate forb	temperate summergreen	lower cool-temperate summergreen	cool-temperate summergreen	intermediate temperate summergreen	warm-temperate summergreen	warm-temperate conifer	warm-temperate broadleaved evergreen	cool-temperate broadleaved evergreen			tundra	boreal forest	temperate forest	warm-temperate forest		sqrt	tundra	boreal forest	temperate forest	warm-temperate forest
Abies	Abies				1				1	1																0	1	1	1		0	0	0	0	0
Alnus	Alnus						1									1										0	1	1	1		0	0	0	0	0
Artemisia	Artemisia		1			1									1											1	1	1	1		0	0	0	0	0
Betula	Betula	1					1									1										1	1	1	1		0	0	0	0	0
Buxus																										0	0	0	0		0	0	0	0	0
Carpinus	Carpinus															1										0	0	1	1		0	0	0	0	0
Castanopsis & Castanea	Castanea-Castanopsis																		1			1				0	0	1	1		0	0	0	0	0
Cayophyllaceae	Caryophyllaceae		1			1									1											1	1	1	1		0	0	0	0	0
Celtis & Aphananthes	Celtis-Aphananthe																			1						0	0	1	1		0	0	0	0	0
Chenopodiaceae	Chenopodiaceae														1											0	0	1	1		0	0	0	0	0
Corylus	Corylus															1										0	0	1	1		0	0	0	0	0
Cupressaceae	Cupressaceae-type										1															0	1	1	1		0	0	0	0	0
Cyclobalanopsis	Quercus subgenus Cyclobalanopsis																					1				0	0	0	1		0	0	0	0	0
Cyperaceae	Cyperaceae													1												1	0	0	0		0	0	0	0	0
Elaeagnus	Elaegnus																			1						0	0	1	1		0	0	0	0	0
Ericaceae	Ericaceae												1													1	1	1	1		0	0	0	0	0
Fagus	Fagus																1	1								0	0	1	1		0	0	0	0	0
Fraxinus	Fraxinus															1										0	0	1	1		0	0	0	0	0
Gramineae	Gramineae											1														1	0	0	0		0	0	0	0	0
Ilex	Ilex																		1	1		1	1			0	0	1	1		0	0	0	0	0
Juglans & Pterocarya	Juglans-Pterocarya															1										0	0	1	1		0	0	0	0	0
Lagerstroemia	Lagerstroemia																									0	0	0	0		0	0	0	0	0
Lepidobalanus	Quercus subgenus Lepidobalanus															1										0	0	1	1		0	0	0	0	0
Ligustrum	Ligustrum																			1		1				0	0	1	1		0	0	0	0	0
other Compositae	Compositae		1			1									1											1	1	1	1		0	0	0	0	0
Picea	Picea				1																					0	1	1	0		0	0	0	0	0
Pinus	Pinus undiff.										1															0	1	1	1		0	0	0	0	0
Polygonaceae	Polygonaceae		1			1									1											1	1	1	1		0	0	0	0	0
Salix	Salix	1					1									1										1	1	1	1		0	0	0	0	0
Sapium	Euphorbiaceae																					1				0	0	0	1		0	0	0	0	0
Sciadopitys	Sciadopitys									1																0	0	1	1		0	0	0	0	0
Taxodiaceae	Cupressaceae-type										1															0	1	1	1		0	0	0	0	0
Thalictrum	Thalictrum		1			1									1											1	1	1	1		0	0	0	0	0
Tilia	Tilia																	1								0	0	1	0		0	0	0	0	0
Tsuga	Tsuga								1	1																0	1	1	1		0	0	0	0	0
Typha																										0	0	0	0		0	0	0	0	0
Ulmus & Zelkova	Ulmus-Zelkova															1				1						0	0	1	1		0	0	0	0	0
Umbelliferae	Umbelliferae		1			1									1											1	1	1	1		0	0	0	0	0
																																0	0	0	0

## Sheet: Lake Suigetsu
		Taxa	Plant fucntional type																							MEGABIOMES						MEGABIOMES
		Arctic/alpine dwarf shrub	Arctic/Alpine forb	Arctic/Alpine fern or fern ally	Boreal evergreen conifer	Boreal forb	Boreal summergreen	Boreal summergreen conifer	Upper cool-temperate conifer	Intermediate-temperate conifer	Euthermic conifer	grass	heath	sedge	temperate forb	temperate summergreen	lower cool-temperate summergreen	cool-temperate summergreen	intermediate temperate summergreen	warm-temperate summergreen	warm-temperate conifer	warm-temperate broadleaved evergreen	cool-temperate broadleaved evergreen			tundra	boreal forest	temperate forest	warm-temperate forest		sqrt	tundra	boreal forest	temperate forest	warm-temperate forest
Abies	Abies				1				1	1																0	1	1	1		0	0	0	0	0
Acanthaceae	Acanthaceae																									0	0	0	0		0	0	0	0	0
Acer	Acer															1										0	0	1	1		0	0	0	0	0
Aesculus	Aesculus																		1							0	0	1	1		0	0	0	0	0
Alnus	Alnus						1									1										0	1	1	1		0	0	0	0	0
Ampelopsis	Vitaceae																									0	0	0	0		0	0	0	0	0
Apiaceae	Apiaceae																									0	0	0	0		0	0	0	0	0
Araliaceae	Araliaceae																		1			1				0	0	1	1		0	0	0	0	0
Artemisia	Artemisia		1			1									1											1	1	1	1		0	0	0	0	0
Asteraceae (Asteroideae)	Compositae		1			1									1											1	1	1	1		0	0	0	0	0
Asteraceae (Cichorioideae)	Compositae		1			1									1											1	1	1	1		0	0	0	0	0
Betula	Betula	1					1									1										1	1	1	1		0	0	0	0	0
Brassicaceae	BRASSICACEAE																									0	0	0	0		0	0	0	0	0
Broken																										0	0	0	0		0	0	0	0	0
Buxus																										0	0	0	0		0	0	0	0	0
Campanula	Campanulaceae																									0	0	0	0		0	0	0	0	0
Carpinus	Carpinus															1										0	0	1	1		0	0	0	0	0
Caryophilaceae	Caryophyllaceae		1			1									1											1	1	1	1		0	0	0	0	0
Castanea-Castanopsis	Castanea-Castanopsis																		1			1				0	0	1	1		0	0	0	0	0
Celtis-Aphananthe	Celtis-Aphananthe																			1						0	0	1	1		0	0	0	0	0
Centaurea	Compositae		1			1									1											1	1	1	1		0	0	0	0	0
Chenopodiaceae	Chenopodiaceae														1											0	0	1	1		0	0	0	0	0
Cornus	Cornus															1										0	0	1	1		0	0	0	0	0
Corylus	Corylus															1										0	0	1	1		0	0	0	0	0
Cryptomeria	Cryptomeria									1																0	0	1	1		0	0	0	0	0
Cupressaceae-Taxoideaceae type	Cupressaceae-type										1															0	1	1	1		0	0	0	0	0
Cyperaceae	Cyperaceae													1												1	0	0	0		0	0	0	0	0
Daphne	Thymelaceae																									0	0	0	0		0	0	0	0	0
Elaeagnus	Elaegnus																			1						0	0	1	1		0	0	0	0	0
Ephedra	Ephedra																									0	0	0	0		0	0	0	0	0
Epilobium	Epilobium					1									1											1	1	1	1		0	0	0	0	0
Ericaceae	Ericaceae												1													1	1	1	1		0	0	0	0	0
Euphorbiaceae	Euphorbiaceae																					1				0	0	0	1		0	0	0	0	0
Fabaceae																										0	0	0	0		0	0	0	0	0
Fagopyrum	Polygonaceae		1			1									1											1	1	1	1		0	0	0	0	0
Fagus crenata type	Fagus crenata																	1								0	0	1	0		0	0	0	0	0
Fagus japonica type	Fagus japonica																1									0	0	1	1		0	0	0	0	0
Filipendula	Filipendula														1											0	0	1	1		0	0	0	0	0
Fraxinus	Fraxinus															1										0	0	1	1		0	0	0	0	0
Gentiana	Gentiana		1			1									1											1	1	1	1		0	0	0	0	0
Geranium	Geranium		1			1									1											1	1	1	1		0	0	0	0	0
Ilex	Ilex																		1	1		1	1			0	0	1	1		0	0	0	0	0
Impatience	Impatiens														1											0	0	1	1		0	0	0	0	0
Juglans	Juglans-Pterocarya															1										0	0	1	1		0	0	0	0	0
Lamiaceae																										0	0	0	0		0	0	0	0	0
Larix	Larix							1																		0	1	0	0		0	0	0	0	0
Ligustrum	Ligustrum																			1		1				0	0	1	1		0	0	0	0	0
Liliaceae	Liliaceae		1			1									1											1	1	1	1		0	0	0	0	0
Mallotus	Mallotus																			1						0	0	1	1		0	0	0	0	0
Monolete spore																										0	0	0	0		0	0	0	0	0
Moraceae	Moraceae															1						1				0	0	1	1		0	0	0	0	0
Myrica	Myrica																	1				1				0	0	1	1		0	0	0	0	0
Oleaceae	Oleaceae																									0	0	0	0		0	0	0	0	0
Persicaria	Polygonaceae		1			1									1											1	1	1	1		0	0	0	0	0
Picea	Picea				1																					0	1	1	0		0	0	0	0	0
Pinus subgen. Diploxylon	Pinus subgenus Diploxylon									1																0	0	1	1		0	0	0	0	0
Pinus subgen. Haploxylon	Pinus subgenus Haploxylon	1			1				1																	1	1	1	0		0	0	0	0	0
Plantago	Plantago														1											0	0	1	1		0	0	0	0	0
Platycarya	Platycarya																			1						0	0	1	1		0	0	0	0	0
Poaceae	Gramineae											1														1	0	0	0		0	0	0	0	0
Podocarpus?	Podocarpus																				1					0	0	1	1		0	0	0	0	0
Polygonum	Polygonum undiff.		1			1									1											1	1	1	1		0	0	0	0	0
Populus?	Saliceae																									0	0	0	0		0	0	0	0	0
Primula	Primulaceae																									0	0	0	0		0	0	0	0	0
Pterocarya	Pterocarya																	1								0	0	1	0		0	0	0	0	0
Quercus (deciduous)	Quercus subgenus Lepidobalanus															1										0	0	1	1		0	0	0	0	0
Quercus (evergreen)	Quercus subgenus Cyclobalanopsis																					1				0	0	0	1		0	0	0	0	0
Ranunculaceae	Ranunculaceae		1			1									1											1	1	1	1		0	0	0	0	0
Rhamnaceae	Rhamnaceae																									0	0	0	0		0	0	0	0	0
Rhus	Rhus															1										0	0	1	1		0	0	0	0	0
Rosaceae	Rosaceae		1			1									1	1										1	1	1	1		0	0	0	0	0
Rubiaceae	Rubiaceae																									0	0	0	0		0	0	0	0	0
Rumex	Rumex					1									1											1	1	1	1		0	0	0	0	0
Rutaceae	Rutaceae																									0	0	0	0		0	0	0	0	0
Salix	Salix	1					1									1										1	1	1	1		0	0	0	0	0
Sanguisorba	Sanguisorba					1									1											1	1	1	1		0	0	0	0	0
Saxifragaceae	Saxifragaceae																									0	0	0	0		0	0	0	0	0
Scabiosa	Scabiosa					1									1											1	1	1	1		0	0	0	0	0
Sciadopitys	Sciadopitys									1																0	0	1	1		0	0	0	0	0
Skimia?	Rutaceae																									0	0	0	0		0	0	0	0	0
Symplocos	Symplocos															1						1				0	0	1	1		0	0	0	0	0
Thalictrum	Thalictrum		1			1									1											1	1	1	1		0	0	0	0	0
Tilia	Tilia																	1								0	0	1	0		0	0	0	0	0
Trilete spore																										0	0	0	0		0	0	0	0	0
Tsuga	Tsuga								1	1																0	1	1	1		0	0	0	0	0
Ulmus-Zelkova	Ulmus-Zelkova															1				1						0	0	1	1		0	0	0	0	0
Unknown																										0	0	0	0		0	0	0	0	0
Valerianaceae																										0	0	0	0		0	0	0	0	0
Viburnum	Viburnum															1										0	0	1	1		0	0	0	0	0
Violaceae	Violaceae																									0	0	0	0		0	0	0	0	0
Viscum	Viscum																						1			0	0	1	1		0	0	0	0	0
Vitis	Vitis															1										0	0	1	1		0	0	0	0	0
																																0	0	0	0
