# Supplementary material for: Terrestrial biosphere changes over the last 120 kyr
Source: Copernicus journal article supplement (doi:10.5194/cp-12-51-2016), 2016-01-18
Supplement: Supplementary file 1 [file cp-12-51-2016-supplement.zip › supplement/Europe/Alps_scores.xls]

## Sheet: Furamoos
Depth (m)	Age controll points (kyr BP)	boreal forest	temperate forest	warm-temperate forest	grassland and dry shrubland	desert	tundra
0.1	1.07929	20.576	21.8528	18.904	11.8217	4.1841	10.4837
0.2	1.46858	24.8882	28.1744	25.7281	6.0788	2.89402	10.909
0.3	1.85787	23.5569	26.259	23.4404	4.14555	2.26637	12.2424
0.4	2.24716
0.5	2.63645	22.4807	24.3736	22.3621	3.34157	2.6297	12.2352
0.6	3.02574
0.8	3.80432	21.9098	23.8376	21.8927	3.3719	2.54991	11.1273
0.9	4.19361
1	4.5829	22.0076	23.4455	21.1725	4.10947	2.54626	10.4858
1.1	4.97219
1.2	5.36148	22.388	24.4488	22.6638	2.88309	1.18104	9.02111
1.3	5.75077
1.4	6.14006	24.2988	26.7657	24.3362	4.57931	2.43332	13.6546
1.5	6.52935
1.6	6.91864	21.4773	23.6817	22.3	2.00676	0.875936	8.48816
1.7	7.30793
1.8	7.69722	21.3992	25.9959	24.3493	1.71795	0.906845	9.37376
1.9	8.08651
2	8.4758	21.7219	25.9071	24.414	5.21744	2.51099	11.2035
2.1	8.86509
2.2	9.25438	22.006	26.4408	24.5221	4.98348	2.97574	13.5218
2.3	9.64367
2.4	10.033	18.3123	23.074	21.7393	5.33598	3.32171	11.6481
2.5	10.4223
2.6	10.8115	17.2225	21.9065	20.4954	6.13701	3.78521	11.2798
2.65	11.0062	18.8112	23.3253	21.9877	5.75794	3.15805	9.50715
2.7	11.2008	10.9304	12.7405	12.7405	9.73432	5.7851	14.0341
2.75	11.3955	14.5372	14.8836	14.8836	9.11335	2.9933	12.4327
2.8	11.59	10.671	11.2313	11.2313	11.3185	4.40184	13.2789
2.85	11.8667	9.57898	9.57898	9.57898	10.6914	5.4731	14.8488
2.9	12.0435	8.16899	8.16899	8.16899	10.1003	5.23327	14.5625
2.95	12.2203
3.08	12.68	10.8599	10.8599	10.8599	9.86077	3.22943	12.0591
3.1	12.7507	9.91272	9.91272	9.91272	9.40325	2.77539	11.6409
3.12	12.8214	12.2877	12.2877	12.2877	11.8107	3.95649	12.2513
3.15	12.9275	11.1967	11.1967	11.1967	10.3135	4.11194	14.3614
3.175	13.0158	7.91671	7.91671	7.91671	8.75711	3.8378	13.5998
3.2	13.1042
3.23	13.2103	10.3886	10.3886	10.3886	11.3332	5.66758	15.3623
3.26	13.3164
3.31	13.4932	8.93495	8.93495	8.93495	11.9362	5.89012	13.441
3.36	13.67
3.4	13.8114	3.61404	3.61404	3.61404	6.08538	4.41025	13.1303
3.44	13.9528
3.5	14.165	3.01774	3.01774	3.01774	6.33089	4.53561	13.0843
3.55	14.3417
3.6	14.5185	2.99634	2.99634	2.99634	5.99564	4.49339	13.162
	hiatus
4.43	40.6205	6.56791	6.56791	5.37457	7.48431	5.13782	10.9669
4.465	40.9148	6.25177	6.25177	5.15223	7.50171	5.25857	10.9396
4.5	41.2092	7.1318	7.1318	6.00385	8.00394	5.80758	13.4101
4.61	42.1342
4.7	42.891	4.89564	4.89564	3.53383	8.34186	6.87302	12.9262
4.775	43.5217
4.82	43.9001	6.01791	6.01791	5.23941	6.58298	4.06043	10.3884
4.865	44.2785
4.93	44.8251	4.52072	4.52072	3.7024	7.96449	6.47045	12.9672
5	45.4137	3.95776	3.95776	3.31137	8.19744	6.75205	12.9732
5.15	46.6751	3.83775	3.83775	3.31811	7.09666	5.72182	12.5751
5.3	47.9364	5.78176	5.78176	4.50536	7.8905	5.85958	12.5038
5.5	49.6183	5.96192	5.96192	4.91471	6.79452	4.60627	10.8801
5.6	50.4592	4.2577	4.2577	3.6727	5.2331	3.85209	7.06864
5.7	51.3001	6.28184	6.28184	5.34423	5.26354	3.27617	8.79521
5.8	52.2611	4.53722	4.53722	4.19721	5.96165	4.43282	8.15051
5.9	53.2222	3.87162	3.87162	3.6723	4.40192	3.37296	7.09308
6.1	55.1444	3.90248	3.90248	3.67712	5.61068	4.41252	8.20166
6.2	56.1055	3.0861	3.0861	3.0861	5.91753	4.68292	8.14096
6.3	57.0666	4.50236	4.50236	4.14175	7.55612	6.14417	8.50148
6.5	58.9888	4.5593	4.85625	4.28258	6.85748	5.51062	7.69141
6.75	61.3915	5.16886	5.16886	4.40235	6.49881	5.12763	7.91805
7	63.7942	5.54492	5.87606	4.99996	6.7536	5.2182	7.66114
7.25	66.1969	5.09335	5.32441	4.26024	6.7303	5.19215	7.27587
7.5	68.5996	5.71398	5.99469	5.02226	7.37105	5.73421	9.11298
7.64	69.9452	10.1799	10.1799	8.09588	8.11987	5.31329	9.42033
7.75	71.0024	12.5842	12.5842	9.65006	10.342	6.4259	11.6019
7.81	71.579	12.217	12.5849	9.32054	9.66887	5.20886	9.49902
7.86	72.0596	13.0636	13.0636	9.20095	9.81298	5.29319	10.1385
7.91	72.5401	13.1928	13.1928	9.5686	9.47294	5.02012	8.78718
8	73.4051	11.9216	12.4188	9.98295	10.302	5.9695	10.903
8.15	74.8467	10.5517	10.8959	8.42982	9.18025	5.44592	10.1493
8.2	75.3273	9.67717	9.67717	8.08121	9.53805	6.39862	10.1168
8.23	75.6156	10.7775	10.7775	8.91726	10.4829	7.47143	11.0131
8.25	75.8078	9.8568	10.24	8.85835	9.62177	7.22868	10.9213
8.27	76	8.60639	8.60639	7.74413	10.1081	7.45048	10.8625
8.31	76.1275	10.8239	10.8239	8.95135	11.4111	7.32573	10.2373
8.39	76.3819	14.4912	14.9005	11.1976	10.6482	5.24315	11.9925
8.5	76.7317	16.291	17.1097	13.3836	9.50594	3.89769	10.5714
8.62	77.1133	15.4398	15.9604	12.7854	9.58059	4.21462	11.2738
8.75	77.5268
8.86	77.8766	12.9616	13.3096	9.60042	8.92432	4.44137	10.7556
9	78.3218
9.15	78.7988	12.1578	12.8956	8.76836	8.17682	3.30644	9.17157
9.3	79.2759
9.4	79.5939	15.1316	15.8556	11.0238	9.03337	4.32705	11.733
9.5	79.9119
9.6	80.2299	14.9121	15.3019	9.86861	9.13905	3.97465	10.4238
9.7	80.5479
9.8	80.866	10.3717	10.3717	6.3749	6.07419	2.95278	10.1942
10	81.502	11.7905	12.3207	7.68621	6.77121	3.325	7.55963
10.2	82.138	11.4977	11.9288	7.81787	6.57735	2.8106	6.90896
10.4	82.7741	12.6118	13.0114	8.93928	7.89707	3.51096	7.68412
10.6	83.4101	11.6639	12.1288	8.49121	7.03681	2.88723	7.48625
10.7	83.7281	10.4858	10.8532	7.50141	5.87614	2.12081	6.47883
10.76	83.919	19.0305	19.8581	13.7764	8.2706	1.95688	6.79634
10.8	84.0462	20.5232	22.0491	14.6954	6.40173	1.07903	5.85276
10.87	84.2688	19.2346	21.7504	15.229	6.25985	1.06735	5.07264
10.9	84.3642	16.6345	19.4026	15.231	7.05486	1.37967	5.4857
10.93	84.4596	16.8547	19.6896	15.9933	6.07211	0.757663	6.0458
10.955	84.5391
10.98	84.6186	16.9167	17.7449	15.7396	10.0385	3.33083	10.2974
11.025	84.7617	12.7983	12.7983	11.3378	9.98855	5.21046	12.129
11.05	84.8412	12.2386	12.2386	10.3859	10.6858	5.79558	11.4532
11.1	85.0002	10.9413	10.9413	8.92312	10.5116	6.6437	11.1048
11.16	85.9756	11.4706	11.4706	9.4201	10.1214	5.96016	10.5734
11.21	86.7896	16.0225	16.0225	12.7087	13.7214	7.99375	11.9639
11.25	87.4407	16.5189	16.5189	11.1722	12.4056	6.70049	9.96041
11.31	88.4175	17.6611	18.0714	12.7691	11.1854	4.67204	9.16011
11.37	89.3942	19.0397	19.4182	11.5651	9.56698	2.64954	6.98013
11.46	90.8593	18.8377	19.5937	12.4141	11.0304	3.32144	5.44711
11.57	92.65	18.9175	19.1847	12.4759	10.7982	2.91113	6.42875
11.67	94.2779	20.4194	20.4194	12.5353	9.94763	2.83782	6.96496
11.77	95.9058	20.5809	20.9478	12.252	8.48829	2.46009	7.95607
11.85	97.2082	20.7489	21.7741	11.8995	6.66778	1.48349	5.30247
11.91	98.1849	24.0285	25.6229	17.7131	5.28724	0.920575	7.71363
11.95	98.836	23.286	25.412	18.8219	5.85333	1.30189	7.29375
11.98	99.3244	22.4714	23.5996	17.1603	7.25942	1.55455	8.17234
12.02	99.9756	20.2144	21.2912	16.1159	7.98454	0.761387	6.50274
12.06	100.627	15.8468	15.8468	12.7968	9.61865	1.92864	7.03547
12.09	101.115	16.1877	16.1877	14.26	9.81525	1.73099	7.7116
12.125	101.685	14.3733	14.3733	12.7805	11.925	3.55962	6.71416
12.14	101.929	14.8205	14.8205	13.3618	11.3602	3.06205	7.5058
12.16	102.255	17.1046	17.8466	13.9382	9.89031	2.5331	7.88695
12.19	102.743	21.4778	22.5138	17.5023	7.05269	1.26886	9.71899
12.21	103.069	19.0466	20.213	17.3295	9.01544	1.56492	8.34374
12.23	103.394	14.8468	15.2465	14.1891	9.80625	2.0768	8.0097
12.27	104.045	14.751	15.402	14.2135	10.0646	1.71995	7.24679
12.285	104.29	15.6624	15.6624	14.8232	7.83979	1.25877	9.92052
12.3	104.534	16.3186	16.3186	15.0793	9.93257	4.15792	13.885
12.345	105.266	17.7313	17.7313	15.4343	13.4543	5.71982	13.0096
12.39	105.999	18.0481	18.0481	13.7186	12.078	6.53774	12.3858
12.44	106.864	18.3472	18.7558	13.4116	11.2654	5.12299	10.556
12.49	107.734	17.0447	17.4617	11.6933	10.8134	4.11492	8.34357
12.58	109.299	16.3441	16.3441	11.2362	11.3812	4.24	7.57007
12.63	110.168	19.096	19.8641	13.0156	9.01516	1.48741	5.82311
12.74	112.081	19.8912	20.9428	14.9384	8.87564	1.94717	8.83728
12.82	113.473	19.8792	20.5194	13.405	9.12514	2.14155	6.16719
12.89	114.69	20.3602	21.0669	12.5811	7.68894	0.499688	3.95527
12.95	115.733	20.6454	21.7206	12.9363	7.80597	1.00576	4.76879
13	116.603	23.2147	25.05	13.1301	4.48277	1.65434	7.65711
13.05	117.473	24.0012	25.3553	15.9663	7.10073	1.92402	7.91265
13.1	118.342	24.9578	28.4063	18.4396	2.63909	0.369358	6.07498
13.19	119.907	24.5947	27.5518	16.7185	2.26776	0.592349	5.62552
13.25	120.951	24.2106	27.8866	17.6525	1.28521	0	4.08114
13.31	121.994	23.409	25.4802	15.6259	1.63347	0.437688	4.18318
13.37	123.038	23.7272	25.6986	16.5087	1.42498	0.640513	3.89597
13.42	123.907	22.357	24.4942	18.317	1.13247	0.414513	3.5786
13.47	124.777	22.0335	25.8189	19.54	1.3255	0.662751	4.38568
13.52	125.646	20.3939	24.4374	17.3812	1.3156	0.850026	3.61552
13.56	126.342	19.9543	24.3925	18.3919	1.98087	0.834474	3.71186
13.59	126.864	19.3337	24.368	18.4009	1.85718	1.0224	4.07734
13.66	128.081	15.8059	20.6039	18.3491	1.62262	0.638551	2.95148
13.7	128.777	15.2381	19.2091	18.2846	1.39771	0.349428	1.83193
13.75	129.646	14.7415	19.7556	18.558	1.83912	0.656179	3.2557
13.775	130.081	14.8456	22.7402	21.7005	2.80594	0.6003	4.09495
13.8	130.516	14.2738	23.0631	22.3577	4.83613	1.40474	5.02718
13.81	130.69
13.82	130.864	14.2442	14.6429	14.6429	12.913	4.52559	8.54595
13.93	132.777	10.4388	10.4388	10.4388	13.9063	8.97725	14.4201
14	133.994	8.54687	8.54687	8.54687	13.7059	10.2171	14.5177
14.1	135.733	12.1099	13.1041	13.1041	13.1499	9.78897	14.6536

## Sheet: Jammertal
Depth in meter	Age (ka) Quest	boreal forest	temperate forest	warm-temperate forest	grassland and dry shrubland	desert	tundra
12.35	109.063	14.3666	14.3666	7.56939	12.5622	7.28378	14.7758
12.4	109.422	15.1917	15.1917	8.61545	13.3179	6.71783	12.3345
12.45	109.781	15.1294	15.1294	8.86945	12.9917	6.05651	11.3575
12.5	110.139	14.9829	14.9829	9.0412	12.9009	5.54595	10.35
12.55	110.498	14.8199	14.8199	8.25634	12.859	5.37652	9.19699
12.6	110.857	15.8564	15.8564	8.55848	11.5025	4.06013	9.43015
12.65	111.215	17.5747	17.5747	8.11724	9.19444	2.1933	8.45498
12.7	111.574	17.2489	17.2489	8.87075	9.74445	2.18426	7.45539
12.75	111.933	17.5574	17.8259	10.4265	10.8241	2.38839	6.86616
12.8	112.292	17.0799	17.3908	11.177	10.9183	2.10732	5.98707
12.85	112.65	23.2192	23.9235	13.9382	8.78722	1.93344	7.43896
12.9	113.009	22.5991	23.5207	13.7908	8.14756	1.60824	5.56392
12.94	113.296	24.6559	25.5338	14.3911	7.17276	1.5447	5.98364
13	113.727	25.0274	26.5337	15.4948	3.19558	1.22084	6.49026
13.05	114.085	24.7288	26.1625	15.1446	3.28411	1.30358	6.64672
13.1	114.444	25.39	27.7052	17.4365	2.69876	0.751133	6.58231
13.15	114.803	24.6747	26.3561	16.1378	2.61367	0.873288	6.21487
13.2	115.162	24.1193	25.5063	14.9666	1.78128	0.499875	6.37318
13.25	115.52	23.4375	25.2583	16.5988	2.42892	1.28543	5.36492
13.3	115.879	23.0524	24.8599	16.6802	1.73511	0.730562	4.6291
13.35	116.238	22.167	23.9789	17.8909	1.34669	0.379504	3.85603
13.4	116.597	22.8022	24.4808	18.1327	1.54222	0.423809	4.21808
13.45	116.955	22.0777	24.2752	18.5277	1.40621	0.554822	3.78568
13.5	117.314	22.5161	24.6825	19.0899	1.30334	0.392232	4.12775
13.55	117.673	21.8545	24.1871	19.3938	1.0882	0.303869	4.24208
13.6	118.032	21.2013	23.7056	18.6912	1.61739	0.525105	4.2935
13.65	118.39	21.9698	24.3	19.1361	1.78305	0.719816	5.1117
13.7	118.749	21.9524	23.8206	19.0421	1.64172	0.661139	4.31274
13.75	119.108	21.8626	24.2283	19.6781	1.73919	0.942863	4.87381
13.8	119.467	22.8631	24.8939	19.2536	1.35216	0.484843	4.15032
13.85	119.825	22.149	25.2575	20.4449	1.58283	0.543393	4.40938
13.9	120.184	22.6428	25.3505	19.6135	1.39381	0.446544	4.12832
13.95	120.543	21.9857	25.2336	20.667	1.49348	0.62152	4.61626
14	120.902	22.7892	25.0014	20.2776	1.65822	0.799459	4.96973
14.05	121.26	22.3799	24.5263	19.1608	1.43166	0.714316	4.5837
14.1	121.619	21.563	24.3527	19.5486	1.35293	0.7731	4.95005
14.15	121.978	19.1006	22.5764	18.4047	1.50464	0.909015	4.54025
14.2	122.337	19.981	23.5408	18.3059	1.64682	0.83761	4.81942
14.25	122.695	19.4646	23.2624	18.2292	1.54801	0.906804	4.26796
14.3	123.054	18.9459	22.6355	17.0691	2.1216	1.10912	5.22386
14.35	123.413	18.5749	23.1559	17.0215	1.93014	1.06256	5.1872
14.4	123.772	18.1873	23.0497	17.8079	2.25035	1.13715	5.34664
14.45	124.13	19.0222	23.3266	17.5495	1.9899	0.968751	5.26744
14.5	124.489	18.216	21.6533	15.6343	1.51126	0.83876	4.50215
14.55	124.848	15.4641	20.5299	17.6099	2.13359	1.06679	3.89901
14.6	125.207	15.9927	19.9209	17.1636	2.43537	1.19441	3.94296
14.63	125.422	15.0965	20.7667	18.8353	2.46533	0.919293	3.84191
14.67	125.709	14.2426	20.6544	18.6887	3.5131	1.61383	5.27099
14.7	125.924	15.1318	22.6109	19.5774	5.21533	2.17326	6.72171
14.75	126.283	14.4821	21.5329	17.8774	5.40711	1.52924	6.52272
14.8	126.642	16.2263	21.7536	17.4495	7.66605	2.15817	8.14755
14.83	126.857	17.0181	20.5433	15.7421	7.75294	1.88713	7.9307
14.85	127	18.1514	18.8162	13.2347	8.51444	2.07542	8.82827
14.87	127.144	16.712	17.0162	10.4893	9.73178	2.36053	9.85538
14.9	127.359	15.2612	15.4862	10.5884	12.5324	3.73644	9.09437
14.93	127.574	14.847	15.3719	10.4018	13.9697	5.57102	10.787
14.95	127.718	16.2452	17.061	11.0314	13.4318	5.23435	11.927
14.98	127.933	15.7272	15.7272	9.84762	13.7679	6.39413	14.6981
15	128.077	13.9315	13.9315	9.25808	14.8065	7.6727	14.2716
15.07	128.579	11.9923	11.9923	7.18847	13.8707	8.28349	14.0567
15.1	128.794	11.7062	11.7062	7.94395	13.4811	7.92427	15.2434
15.15	129.153	7.67007	7.67007	5.17785	11.5603	8.74674	16.0344
15.2	129.511	8.60576	8.60576	5.71058	13.0296	9.029	15.1183

## Sheet: Samerberg
Proben der Abb. 1	Tiefen	Artificial depth			Quest age (ka)	boreal forest	temperate forest	warm-temperate forest	grassland and dry shrubland	desert	tundra
X	980	0	further stadial phases of the Würm glacial period			12.3372	12.8404	9.72692	10.0884	6.15547	12.2178				Age determination			linear interpolation midpoints
X	985	5	further stadial phases of the Würm glacial period			11.8217	12.5121	9.55662	10.3303	6.01212	12.0082
X	995	15	further stadial phases of the Würm glacial period			11.5163	11.5163	8.41265	10.8963	5.90388	12.5921				classification of the Upper Pleistocene	MIS (marine isotope stages)		start of MIS	Lisiecki and Raymo stack
X	1001	21	further stadial phases of the Würm glacial period			11.9132	12.3064	9.12962	10.906	5.3097	11.8821					or OIS (oxygen isotope stages)		(ka)
X	1005	25	further stadial phases of the Würm glacial period			13.1615	13.5127	10.3883	11.3239	5.53608	12.1712				fourth stadial of the Würmian/further stadials
X	1011	31	further stadial phases of the Würm glacial period			12.5328	12.5328	9.31292	11.1686	5.21776	12.0929				third interstadial of the Würmian
X	1014	34	further stadial phases of the Würm glacial period			11.4738	11.7298	8.59456	11.0551	6.04199	12.8131				third stadial of the Würmian	4		71 (74?)	64
X	1018	38	further stadial phases of the Würm glacial period			13.7117	13.7117	9.78668	10.7733	5.8411	13.4298				second interstadial of the Würmian	5a = 5.5		84.74	82
X	1021	41	further stadial phases of the Würm glacial period			18.7568	19.2116	12.9226	10.0546	4.14456	11.1369				second stadial of the Würmian	5b = 5.4		92.84	87
X	1030	50	further stadial phases of the Würm glacial period			16.4816	16.9802	11.3797	10.186	4.9493	11.1259				first interstadial of the Würmian	5c = 5.3		105.92	96
X	1035	55	further stadial phases of the Würm glacial period			15.4905	15.7771	11.1686	11.9236	6.00342	9.57597				first stadial of the Würmian	5d = 5.2		115105	109
X	1045	65	further stadial phases of the Würm glacial period			15.2609	15.7209	10.3816	11.0043	5.62947	10.1247				Riss/Würm interglacial = Eemian	5e = 5.1		130115	123
X	1055	75	further stadial phases of the Würm glacial period			14.0396	14.5621	10.2002	10.874	5.38579	9.50893
X	1066	86	further stadial phases of the Würm glacial period			13.0255	13.6072	9.54547	10.0106	5.38407	9.99507
X	1077	97	further stadial phases of the Würm glacial period			14.8132	15.0996	10.3602	10.7846	5.33427	10.5695
X	1085	105	further stadial phases of the Würm glacial period			12.9094	12.9094	8.67658	12.3075	7.27062	9.98617
X	1095	115	further stadial phases of the Würm glacial period			12.9217	13.2066	9.12739	11.6322	7.10056	10.6835
X	1105	125	further stadial phases of the Würm glacial period			13.604	13.604	9.19749	11.9443	6.96844	11.0138
X	1112	132	further stadial phases of the Würm glacial period			12.0751	12.0751	7.75808	11.7182	7.16342	10.1343
X	1120	140	further stadial phases of the Würm glacial period			10.9886	10.9886	7.93235	12.1077	7.58017	11.7931
X	1130	150	further stadial phases of the Würm glacial period			9.98459	9.98459	7.33059	11.289	7.40106	10.5223
X	1136	156	further stadial phases of the Würm glacial period			9.35307	9.35307	6.16086	10.8032	6.52201	9.00049
X	1145	165	further stadial phases of the Würm glacial period			10.4725	10.7227	6.77303	11.5615	7.29079	9.83961
X	1152	172	further stadial phases of the Würm glacial period			10.5907	10.8528	7.07188	10.6238	5.7111	8.68494
X	1159	179	further stadial phases of the Würm glacial period			11.7077	11.7077	7.75459	10.7979	6.0414	9.31648
X	1164	184	third interstadial phase of the Würm glacial period			15.9003	15.9003	7.98819	8.92088	2.38306	5.63866
X	1171	191	third interstadial phase of the Würm glacial period			17.0306	17.0306	8.97196	8.40265	2.08536	5.16573
X	1177	197	third interstadial phase of the Würm glacial period			16.1626	16.4746	7.70552	7.91743	2.35825	5.24066
X	1178	198	third interstadial phase of the Würm glacial period			15.791	16.2284	11.3853	13.3288	5.56459	10.6012
X	1181	201	third interstadial phase of the Würm glacial period			15.9014	15.9014	12.6674	15.0662	5.19797	11.011
X	1188	208	third interstadial phase of the Würm glacial period			14.6004	14.8915	11.585	14.3636	6.07398	11.5979
X	1191.5	211.5	third interstadial phase of the Würm glacial period			12.1889	12.6233	10.8678	12.6437	7.02209	14.34
X	1195	215	third stadial phase of the Würm glacial period	MIS 4	72.054	12.8711	13.1422	10.4306	12.4452	6.82592	12.8917
X	1206	226	third stadial phase of the Würm glacial period	MIS 4	72.5028	14.2499	14.8191	11.027	11.6621	5.75504	12.3873
X	1217	237	third stadial phase of the Würm glacial period	MIS 4	72.9516	15.0772	15.4886	11.5301	11.3712	5.20315	11.4453
X	1228	248	third stadial phase of the Würm glacial period	MIS 4	73.4004	12.708	13.0724	9.2031	10.4285	5.50683	10.1082
X	1240	260	third stadial phase of the Würm glacial period	MIS 4	73.89	13.0402	13.0402	9.54421	12.1965	6.8594	11.7127
X	1250	270	third stadial phase of the Würm glacial period	MIS 4	74.298	14.2626	14.6601	11.044	13.7312	7.77978	11.9505
X	1260	280	third stadial phase of the Würm glacial period	MIS 4	74.706	15.0554	15.0554	11.3478	12.9724	6.58271	11.553
X	1270	290	third stadial phase of the Würm glacial period	MIS 4	75.114	15.121	15.121	11.154	12.3776	6.40292	11.6046
X	1280	300	third stadial phase of the Würm glacial period	MIS 4	75.522	13.718	14.1894	10.3565	12.4566	6.73367	11.3293
X	1285	305	second interstadial phase of the Würm glacial period	MIS 5a	75.726	12.9513	13.2239	8.52259	10.5558	5.16277	8.84114
X	1289	309	second interstadial phase of the Würm glacial period	MIS 5a	75.8892	16.0471	16.0471	10.1958	10.9063	3.76547	6.65558
X	1295	315	second interstadial phase of the Würm glacial period	MIS 5a	76.134	16.4797	16.796	9.46745	9.40819	2.30578	5.30327
X	1300	320	second interstadial phase of the Würm glacial period	MIS 5a	76.338	16.5254	17.0552	9.74803	8.24745	2.46855	5.24036
X	1310	330	second interstadial phase of the Würm glacial period	MIS 5a	76.746	16.3527	16.8117	7.53703	6.27807	0.973841	3.39679
X	1320	340	second interstadial phase of the Würm glacial period	MIS 5a	77.154	16.1697	16.6074	7.84704	7.24463	2.12162	4.23162
X	1330	350	second interstadial phase of the Würm glacial period	MIS 5a	77.562	18.7691	19.3962	10.1752	7.01811	2.35595	5.9573
X	1340	360	second interstadial phase of the Würm glacial period	MIS 5a	77.97	17.4288	17.7354	9.00179	5.44583	1.27603	4.97208
X	1350	370	second interstadial phase of the Würm glacial period	MIS 5a	78.378	19.5291	20.1581	11.0705	6.06834	0.994545	5.40767
X	1360	380	second interstadial phase of the Würm glacial period	MIS 5a	78.786	19.1689	20.7747	12.2067	6.77977	1.1229	4.90858
X	1365	385	second interstadial phase of the Würm glacial period	MIS 5a	78.99	19.2822	20.6313	14.259	7.96256	1.53811	7.03547
X	1370	390	second interstadial phase of the Würm glacial period	MIS 5a	79.194	18.0315	19.9607	13.1975	8.36064	1.5837	6.26925
X	1375	395	second interstadial phase of the Würm glacial period	MIS 5a	79.398	17.9916	19.235	13.5848	10.1772	2.01177	5.98855
X	1383	403	second interstadial phase of the Würm glacial period	MIS 5a	79.7244	17.4469	18.2287	13.5273	11.6523	3.20342	8.30486
X	1386	406	second interstadial phase of the Würm glacial period	MIS 5a	79.8468	19.5792	19.8702	13.5466	12.5336	4.27496	10.3869
X	1391	411	second interstadial phase of the Würm glacial period	MIS 5a	80.0508	17.3883	17.6759	13.9359	14.4174	6.06545	11.3673
X	1395	415	second interstadial phase of the Würm glacial period	MIS 5a	80.214	17.3379	17.3379	13.7251	13.8687	5.52816	11.8664
X	1403	423	second stadial phase of the Würm glacial period	MIS 5b	80.5404	16.1565	16.1565	12.9659	13.6898	5.68384	12.0071
X	1410	430	second stadial phase of the Würm glacial period	MIS 5b	80.826	14.3848	14.3848	11.8787	14.9459	7.55163	12.3101
X	1430	450	second stadial phase of the Würm glacial period	MIS 5b	81.642	14.2807	14.5898	12.4885	14.326	7.1794	11.6417
X	1450	470	second stadial phase of the Würm glacial period	MIS 5b	82.458	16.7499	17.058	14.259	14.8771	6.84827	11.7431
X	1472	492	second stadial phase of the Würm glacial period	MIS 5b	83.3556	15.923	15.923	12.8321	14.4962	6.64435	11.6266
X	1495	515	second stadial phase of the Würm glacial period	MIS 5b	84.294	15.9719	16.2692	12.8921	14.3142	7.45333	12.6785
X	1517	537	second stadial phase of the Würm glacial period	MIS 5b	85.1916	17.0467	17.3456	13.6743	14.3478	7.00352	12.1101
X	1535	555	second stadial phase of the Würm glacial period	MIS 5b	85.926	13.2964	13.8251	10.7259	10.7	5.33468	10.5602
X	1555	575	second stadial phase of the Würm glacial period	MIS 5b	86.742	16.7335	16.7335	12.445	10.5494	4.28003	9.74547
X	1575	595	second stadial phase of the Würm glacial period	MIS 5b	87.558	16.7797	16.7797	12.9764	11.6712	6.06348	9.46686
X	1595	615	second stadial phase of the Würm glacial period	MIS 5b	88.374	17.646	17.9401	13.6915	13.713	7.69076	13.3662
X	1610	630	second stadial phase of the Würm glacial period	MIS 5b	88.986	16.0489	16.3273	11.4472	12.4748	5.81143	9.83047
X	1630	650	second stadial phase of the Würm glacial period	MIS 5b	89.802	17.2205	17.6375	12.636	12.1475	4.72412	10.1039
X	1650	670	second stadial phase of the Würm glacial period	MIS 5b	90.618	16.6913	16.9768	11.2275	12.156	6.50947	11.7632
X	1670	690	second stadial phase of the Würm glacial period	MIS 5b	91.434	18.1006	18.6934	13.2697	13.3523	6.00506	9.32546
X	1695	715	second stadial phase of the Würm glacial period	MIS 5b	92.454	17.2528	17.2528	12.5378	13.6134	6.0556	10.955
X	1720	740	second stadial phase of the Würm glacial period	MIS 5b	93.474	16.396	16.396	12.5075	13.6958	6.59307	10.5625
X	1730	750	second stadial phase of the Würm glacial period	MIS 5b	93.882	17.0796	17.0796	12.8897	13.6538	7.19097	11.7427
X	1740	760	second stadial phase of the Würm glacial period	MIS 5b	94.29	16.1101	16.6178	13.1871	12.8913	6.72593	12.4506
X	1745	765	second stadial phase of the Würm glacial period	MIS 5b	94.494	15.7445	16.1551	11.8977	12.7412	6.48451	11.1173
X	1750	770	first interstadial phase of the Würm glacial period	MIS 5c	94.698	15.8896	16.3158	10.9574	11.3538	4.62388	8.1527
X	1755	775	first interstadial phase of the Würm glacial period	MIS 5c	94.902	17.6079	17.6079	9.47816	9.98351	3.12075	5.20189
X	1760	780	first interstadial phase of the Würm glacial period	MIS 5c	95.106	17.0014	17.4282	9.42401	8.57799	1.74224	4.41944
X	1765	785	first interstadial phase of the Würm glacial period	MIS 5c	95.31	18.4118	18.4118	9.92269	8.81481	2.28699	5.96022
X	1770	790	first interstadial phase of the Würm glacial period	MIS 5c	95.514	17.5592	17.5592	8.92436	9.00756	1.96935	4.27941
X	1772	792	first interstadial phase of the Würm glacial period	MIS 5c	95.5956	17.2119	17.7993	8.72582	7.77914	2.18363	4.32142
X	1778	798	first interstadial phase of the Würm glacial period	MIS 5c	95.8404	16.7296	17.0414	8.33558	6.81208	1.05742	4.31369
X	1782	802	first interstadial phase of the Würm glacial period	MIS 5c	96.0036	16.9701	17.2682	9.10639	8.09463	1.88223	4.95087
X	1783	803	first interstadial phase of the Würm glacial period	MIS 5c	96.0444	17.4225	17.7327	9.79066	8.54512	2.03756	5.26743
X	1786	806	first interstadial phase of the Würm glacial period	MIS 5c	96.1668	17.2962	17.9191	10.4032	9.48625	2.03303	4.40402
X	1791	811	first interstadial phase of the Würm glacial period	MIS 5c	96.3708	18.352	18.6602	10.7337	8.37181	1.19352	5.05711
X	1797	817	first interstadial phase of the Würm glacial period	MIS 5c	96.6156	17.4433	17.8877	10.5611	9.1912	1.821	5.15604
X	1800	820	first interstadial phase of the Würm glacial period	MIS 5c	96.738	16.4067	16.7158	8.73648	8.32958	1.85429	3.94535
X	1805	825	first interstadial phase of the Würm glacial period	MIS 5c	96.942	19.1631	19.4691	9.72474	8.30915	2.27124	4.35832
X	1807	827	first interstadial phase of the Würm glacial period	MIS 5c	97.0236	17.0514	17.0514	8.07336	6.81532	1.283	4.03116
X	1817	837	first interstadial phase of the Würm glacial period	MIS 5c	97.4316	18.3195	18.3195	8.02021	6.83049	1.15589	4.28676
X	1827	847	first interstadial phase of the Würm glacial period	MIS 5c	97.8396	17.7006	18.1432	8.10909	6.94387	1.52671	4.21864
X	1837	857	first interstadial phase of the Würm glacial period	MIS 5c	98.2476	18.0719	18.6163	7.72747	5.92553	1.37021	4.31224
X	1847	867	first interstadial phase of the Würm glacial period	MIS 5c	98.6556	19.5972	20.0344	9.00851	6.11676	0.977764	4.66616
X	1857	877	first interstadial phase of the Würm glacial period	MIS 5c	99.0636	18.5633	19.2783	8.6498	6.47906	1.33095	4.43739
X	1867	887	first interstadial phase of the Würm glacial period	MIS 5c	99.4716	18.8607	19.6243	8.97143	5.21445	0.985808	4.52412
X	1879	899	first interstadial phase of the Würm glacial period	MIS 5c	99.9612	18.5175	19.3823	9.48273	4.72509	1.26592	5.54323
X	1889	909	first interstadial phase of the Würm glacial period	MIS 5c	100.369	19.9545	21.1705	11.3436	4.94545	1.09612	6.0735
X	1897	917	first interstadial phase of the Würm glacial period	MIS 5c	100.696	17.1875	18.0245	8.62618	4.43081	1.49677	3.90232
X	37	920	first interstadial phase of the Würm glacial period	MIS 5c	100.818	18.9249	20.3186	12.2799	5.7791	1.20913	6.38393
X	33	924	first interstadial phase of the Würm glacial period	MIS 5c	100.981	18.132	19.5965	11.7524	6.26897	0.437688	4.51416
	30	927	first interstadial phase of the Würm glacial period	MIS 5c	101.104
	29	928	first interstadial phase of the Würm glacial period	MIS 5c	101.144	17.6515	18.5398	11.9018	8.48857	1.53813	5.10972
	28	929	first interstadial phase of the Würm glacial period	MIS 5c	101.185
X	26	931	first interstadial phase of the Würm glacial period	MIS 5c	101.267	17.3884	18.0854	11.9666	9.16019	1.86255	5.97048
	25	932	first interstadial phase of the Würm glacial period	MIS 5c	101.308
	23	934	first interstadial phase of the Würm glacial period	MIS 5c	101.389	17.2558	17.6992	12.777	10.5907	2.2943	5.2639
X	21	936	first interstadial phase of the Würm glacial period	MIS 5c	101.471	17.3794	17.3794	12.7599	11.2005	2.65507	6.59455
X	17	940	first interstadial phase of the Würm glacial period	MIS 5c	101.634	15.8841	15.8841	12.3625	11.1888	2.77055	7.222
	15	942	first interstadial phase of the Würm glacial period	MIS 5c	101.716	17.5151	17.9571	13.4647	11.3046	2.93848	8.02261
	14	943	first interstadial phase of the Würm glacial period	MIS 5c	101.756	17.5127	18.1401	12.5673	11.0835	3.88829	7.17081
X	12.5	944.5	first interstadial phase of the Würm glacial period	MIS 5c	101.818	18.4368	19.2569	12.7292	9.83191	2.84571	6.32716
	11.5	945.5	first interstadial phase of the Würm glacial period	MIS 5c	101.858	17.9877	19.2482	12.0147	7.5259	1.39104	5.21957
	10	947	first interstadial phase of the Würm glacial period	MIS 5c	101.92
X	9	948	first interstadial phase of the Würm glacial period	MIS 5c	101.96	18.6158	20.8379	13.3094	7.20594	1.26442	5.36995
	8	949	first interstadial phase of the Würm glacial period	MIS 5c	102.001
X	7	950	first interstadial phase of the Würm glacial period	MIS 5c	102.042	17.9426	19.2659	12.5766	8.0573	1.89005	5.89729
X	2046	954	first interstadial phase of the Würm glacial period	MIS 5c	102.205
X	2056	964	first interstadial phase of the Würm glacial period	MIS 5c	102.613	19.5763	21.2192	14.9458	10.1075	2.35638	7.44796
X	2066	974	first interstadial phase of the Würm glacial period	MIS 5c	103.021
X	2072.5	980.5	first interstadial phase of the Würm glacial period	MIS 5c	103.286	19.963	20.2644	15.0811	12.497	2.87808	9.46072
X	2076.5	984.5	first interstadial phase of the Würm glacial period	MIS 5c	103.45	18.8617	19.1626	15.6351	13.9788	4.14076	11.9742
X	2081	989	first interstadial phase of the Würm glacial period	MIS 5c	103.633	16.9814	16.9814	15.2334	14.0406	5.08307	12.1957
X	2085	993	first interstadial phase of the Würm glacial period	MIS 5c	103.796	18.5607	18.8617	15.6351	13.9788	4.14076	11.9742				1018.25
X	2095.5	1003.5	first stadial phase of the Würm glacial period	MIS 5d	104.225	17.6926	18.4272	14.4241	13.2	6.42792	12.7424
X	2101	1009	first stadial phase of the Würm glacial period	MIS 5d	104.449	16.5893	17.013	12.6158	12.8436	6.29742	12.9111
X	2109.5	1017.5	first stadial phase of the Würm glacial period	MIS 5d	104.796	16.2369	16.8277	13.1547	13.8868	7.40948	12.922
X	2117.5	1025.5	first stadial phase of the Würm glacial period	MIS 5d	105.122	15.1182	15.528	11.9839	13.0074	7.16862	12.1352
X	2125	1033	first stadial phase of the Würm glacial period	MIS 5d	105.428	14.799	14.799	10.7774	12.3234	6.23917	11.7767
X	2131	1039	Riss/Würm interglacial period	MIS 5e	105.673	16.3524	16.9638	11.292	12.4299	5.47912	8.73784
X	2139.5	1047.5	Riss/Würm interglacial period	MIS 5e	106.02	17.4512	17.8855	11.4841	10.336	3.12841	7.67445
X	2144.5	1052.5	Riss/Würm interglacial period	MIS 5e	106.224	17.3639	17.8962	10.7268	9.51762	2.45834	6.54594
X	2149.5	1057.5	Riss/Würm interglacial period	MIS 5e	106.428	21.2726	22.0814	12.194	7.92301	1.95696	6.55392
X	2155	1063	Riss/Würm interglacial period	MIS 5e	106.652	20.1389	21.0442	9.5451	6.3233	1.51489	4.03434
	421.5	1067	Riss/Würm interglacial period	MIS 5e	106.816	17.9051	18.471	10.9257	8.91701	1.83133	4.91209
	415	1073.5	Riss/Würm interglacial period	MIS 5e	107.081
	410	1078.5	Riss/Würm interglacial period	MIS 5e	107.285	18.2567	18.7012	9.99198	7.93699	1.04257	4.27034
	407	1081.5	Riss/Würm interglacial period	MIS 5e	107.407
	403	1085.5	Riss/Würm interglacial period	MIS 5e	107.57	19.2466	19.9367	7.86355	5.25703	0.690066	3.39468
X	400	1088.5	Riss/Würm interglacial period	MIS 5e	107.693
X	392.5	1096	Riss/Würm interglacial period	MIS 5e	107.999	19.8044	22.7467	11.9142	5.22504	1.52293	5.23235
X	380	1108.5	Riss/Würm interglacial period	MIS 5e	108.509
X	370	1118.5	Riss/Würm interglacial period	MIS 5e	108.917	22.7459	25.4928	12.7942	3.41325	1.13432	5.2528
X	364	1124.5	Riss/Würm interglacial period	MIS 5e	109.162
X	356	1132.5	Riss/Würm interglacial period	MIS 5e	109.488	22.3557	24.2858	11.2394	2.48975	0.857965	3.84583
X	350	1138.5	Riss/Würm interglacial period	MIS 5e	109.733
X	340	1148.5	Riss/Würm interglacial period	MIS 5e	110.141	21.9882	24.1353	10.791	1.95744	0.315912	2.83751
X	330	1158.5	Riss/Würm interglacial period	MIS 5e	110.549
X	320	1168.5	Riss/Würm interglacial period	MIS 5e	110.957	22.0493	25.0761	11.8709	2.43658	0.545816	3.06683
X	312.5	1176	Riss/Würm interglacial period	MIS 5e	111.263
X	300	1188.5	Riss/Würm interglacial period	MIS 5e	111.773	22.9828	25.1807	12.0682	1.89699	0.760783	3.4016
X	290	1198.5	Riss/Würm interglacial period	MIS 5e	112.181
X	280	1208.5	Riss/Würm interglacial period	MIS 5e	112.589	22.8654	26.0692	13.318	1.76878	0	2.24922
X	270	1218.5	Riss/Würm interglacial period	MIS 5e	112.997
X	260	1228.5	Riss/Würm interglacial period	MIS 5e	113.405	24.4506	27.3292	14.9748	1.98743	0.603847	3.5205
X	250	1238.5	Riss/Würm interglacial period	MIS 5e	113.813
X	240	1248.5	Riss/Würm interglacial period	MIS 5e	114.221	24.1599	27.1453	14.7914	2.69854	0.98198	4.38941
X	230	1258.5	Riss/Würm interglacial period	MIS 5e	114.629
X	225	1263.5	Riss/Würm interglacial period	MIS 5e	114.833	24.0956	26.9723	14.6526	2.23931	0.442374	3.38719
X	220	1268.5	Riss/Würm interglacial period	MIS 5e	115.037
X	215	1273.5	Riss/Würm interglacial period	MIS 5e	115.241	23.6381	28.6898	17.7625	2.40696	0.771134	4.21218
X	210	1278.5	Riss/Würm interglacial period	MIS 5e	115.445
X	205	1283.5	Riss/Würm interglacial period	MIS 5e	115.649	24.2642	29.2747	18.6937	2.33507	0.42855	3.697
X	200	1288.5	Riss/Würm interglacial period	MIS 5e	115.853
	199	1289.5	Riss/Würm interglacial period	MIS 5e	115.894	21.2439	24.5858	14.0516	2.69406	1.179	2.6427
X	198	1290.5	Riss/Würm interglacial period	MIS 5e	115.934
X	196	1292.5	Riss/Würm interglacial period	MIS 5e	116.016	22.4084	26.0604	14.8962	2.05704	0.579528	3.49659
	194	1294.5	Riss/Würm interglacial period	MIS 5e	116.098
	192	1296.5	Riss/Würm interglacial period	MIS 5e	116.179	22.7288	27.3026	16.8805	2.7616	0.298674	3.29381
X	190	1298.5	Riss/Würm interglacial period	MIS 5e	116.261
	188	1300.5	Riss/Würm interglacial period	MIS 5e	116.342	21.3218	26.0332	18.0245	3.47219	0.996366	3.46103
X	186	1302.5	Riss/Würm interglacial period	MIS 5e	116.424
X	184	1304.5	Riss/Würm interglacial period	MIS 5e	116.506	20.5366	25.6129	20.1145	4.14272	1.16631	4.20956
X	180	1308.5	Riss/Würm interglacial period	MIS 5e	116.669
X	176	1312.5	Riss/Würm interglacial period	MIS 5e	116.832	19.9125	26.0793	20.2808	4.40216	0.475472	3.4308
X	172	1316.5	Riss/Würm interglacial period	MIS 5e	116.995
X	168	1320.5	Riss/Würm interglacial period	MIS 5e	117.158	17.4373	24.6863	20.4949	6.00269	1.13213	5.0425
	166	1322.5	Riss/Würm interglacial period	MIS 5e	117.24
X	164	1324.5	Riss/Würm interglacial period	MIS 5e	117.322	19.4835	23.9397	20.2074	8.99423	1.85759	6.25782
X	160	1328.5	Riss/Würm interglacial period	MIS 5e	117.485
X	158	1330.5	Riss/Würm interglacial period	MIS 5e	117.566	18.1913	18.9846	16.5726	12.1093	3.18987	8.1255
X	156	1332.5	Riss/Würm interglacial period	MIS 5e	117.648
X	154	1334.5	Riss/Würm interglacial period	MIS 5e	117.73	15.6645	16.111	16.111	13.9641	4.81341	9.3641
X	152	1336.5	Riss/Würm interglacial period	MIS 5e	117.811	16.4344	16.9661	16.6591	15.1182	6.10318	11.6917
X	148	1340.5	Riss/Würm interglacial period	MIS 5e	117.974	15.2413	15.7797	15.7797	15.852	5.74673	10.0881
X	144	1344.5	Riss/Würm interglacial period	MIS 5e	118.138	15.0347	15.3503	15.0347	16.0932	6.7185	9.93447
X	140	1348.5	Riss/Würm interglacial period	MIS 5e	118.301	16.5721	17.3288	16.2587	16.269	6.1516	10.9468
X	135	1353.5	Riss/Würm interglacial period	MIS 5e	118.505	15.4927	15.4927	15.4927	15.9815	6.99444	11.6529
X	130	1358.5	Riss/Würm interglacial period	MIS 5e	118.709	14.3616	14.6722	13.8238	16.5805	8.40964	11.9279
X	128	1360.5	Riss/Würm interglacial period	MIS 5e	118.79	13.8152	14.7469	14.1258	16.4249	8.77167	12.9809
X	120	1368.5	Riss/Würm interglacial period	MIS 5e	119.117	12.4917	12.4917	12.1831	16.4725	9.50421	13.9018
X	110	1378.5	Riss/Würm interglacial period	MIS 5e	119.525	12.2558	12.8257	12.2558	16.0617	8.86052	11.4002
X	100	1388.5	Riss/Würm interglacial period	MIS 5e	119.933	11.7555	11.7555	11.4326	16.8314	9.94353	13.5584
X	90	1398.5	Riss/Würm interglacial period	MIS 5e	120.341	11.199	11.6275	11.1027	16.089	10.4852	13.6523
X	80	1408.5	Riss/Würm interglacial period	MIS 5e	120.749
X	70	1418.5	Riss/Würm interglacial period	MIS 5e	121.157	12.3189	12.6292	12.1904	17.3263	11.1766	11.8332
X	60	1428.5	Riss/Würm interglacial period	MIS 5e	121.565
X	50	1438.5	Riss/Würm interglacial period	MIS 5e	121.973	12.9675	12.9675	11.753	17.0621	10.3924	11.8755
X	40	1448.5	Riss/Würm interglacial period	MIS 5e	122.381
X	28	1460.5	Riss/Würm interglacial period	MIS 5e	122.87	13.3003	13.6769	12.8348	15.0549	9.4586	14.7989
	27	1461.5
	24	1464.5				14.0465	14.6082	13.8139	15.8339	8.27523	12.8219
	20	1468.5
	18	1470.5				12.1709	12.1709	11.5267	14.3671	6.85013	11.1988
	17	1471.5				18.1135	20.7971	17.1687	8.79868	0.440012	4.7078
	15	1473.5				18.2287	20.2293	16.4607	9.62954	1.63513	5.77228
	12	1476.5				16.7628	17.448	14.4029	10.6713	1.62117	3.81865
	8	1480.5				14.6517	15.0884	14.4708	14.4877	6.17889	11.0873
	4	1484.5				12.5524	12.5524	12.1098	15.3727	7.5177	10.0748
	O

## Sheet: Wurzach
Depth (cm)	Depth [m]	Comm		Age Quest (ka)	boreal forest	temperate forest	warm-temperate forest	grassland and dry shrubland	desert	tundra
740					15.4077	15.8974	15.4077	10.8712	5.70839	13.7553
790					13.5815	14.0918	14.0918	11.1837	3.24515	9.19038			Age determination
6460	64.6	fourth stadial phase of the Würm glacial period			16.6192	18.3095	12.6912	11.0436	6.73412	10.0829
6490	64.9	fourth stadial phase of the Würm glacial period			11.5464	11.9399	9.65953	9.94901	6.95263	13.3145			classification of the Upper Pleistocene	MIS (marine isotope stages)		start of MIS	Lisiecki and Raymo stack
6520	65.2	fourth stadial phase of the Würm glacial period			15.9311	16.918	12.9942	8.95062	5.04424	11.1342				or OIS (oxygen isotope stages)		(ka)
6550	65.5	fourth stadial phase of the Würm glacial period			12.2682	13.2651	9.78736	9.66978	5.54442	11.4109			fourth stadial of the Würmian/further stadials
6565	65.65	fourth stadial phase of the Würm glacial period			14.3558	16.3002	14.4155	8.02777	6.04748	10.8939			third interstadial of the Würmian
6605	66.05	fourth stadial phase of the Würm glacial period			22.7289	24.9198	18.4418	6.58879	3.18292	9.15624			third stadial of the Würmian	4		71 (74?)	64
6632	66.32	fourth stadial phase of the Würm glacial period			17.3964	19.7408	15.5557	8.76974	4.24	9.7628			second interstadial of the Würmian	5a = 5.5		84.74	82
6660	66.6	fourth stadial phase of the Würm glacial period			21.3669	23.3569	18.3396	9.98651	5.52625	9.96498			second stadial of the Würmian	5b = 5.4		92.84	87
6690	66.9	fourth stadial phase of the Würm glacial period			17.4904	19.9871	14.9106	9.46483	5.24778	10.0314			first interstadial of the Würmian	5c = 5.3		105.92	96
6720	67.2	fourth stadial phase of the Würm glacial period			18.2706	19.8179	14.392	9.0176	4.47599	10.3733			first stadial of the Würmian	5d = 5.2		115105	109
6750	67.5	fourth stadial phase of the Würm glacial period			16.9469	18.6494	12.6483	10.9974	7.05026	8.81571			Riss/Würm interglacial = Eemian	5e = 5.1		130115	123
6780	67.8	fourth stadial phase of the Würm glacial period			18.7626	20.2652	15.866	8.90082	4.76599	10.9046
6810	68.1	fourth stadial phase of the Würm glacial period			14.5477	15.4413	11.7992	9.69321	6.23257	11.93
6830	68.3	fourth stadial phase of the Würm glacial period			21.6681	23.6922	18.0431	8.71369	4.16003	9.34955
6850	68.5	fourth stadial phase of the Würm glacial period			15.5103	16.715	13.2889	9.18247	5.92747	13.1483
6870	68.7	fourth stadial phase of the Würm glacial period			15.1558	15.8398	11.1914	10.0244	4.92484	9.94255
6890	68.9	fourth stadial phase of the Würm glacial period			18.366	19.8181	14.3586	9.65617	4.92441	10.385
6910	69.1	fourth stadial phase of the Würm glacial period			16.6913	18.2926	16.2273	10.3724	6.8372	13.267
6930	69.3	fourth stadial phase of the Würm glacial period			11.8537	13.1353	9.90891	9.17401	5.35321	11.3188
6950	69.5	fourth stadial phase of the Würm glacial period			13.7046	14.5048	11.0976	11.0583	8.2636	11.6295
6970	69.7	fourth stadial phase of the Würm glacial period			14.6707	16.0191	12.8009	10.8818	6.15552	10.5838
6990	69.9	fourth stadial phase of the Würm glacial period			15.9692	17.3626	13.8522	10.123	6.8686	13.5556
7015	70.15	fourth stadial phase of the Würm glacial period			17.2513	17.8	10.6218	8.47652	3.62034	8.84722
7040	70.4	fourth stadial phase of the Würm glacial period			18.0692	19.9148	16.2121	10.0903	5.5386	13.4221
7060	70.6	fourth stadial phase of the Würm glacial period			13.8852	15.1039	12.7076	10.6353	7.31028	12.5753
7098	70.98	fourth stadial phase of the Würm glacial period			16.9686	18.6355	14.8402	11.0259	7.73873	12.5874
7125	71.25	fourth stadial phase of the Würm glacial period			14.9332	16.3939	13.588	11.3643	7.87702	13.5088
7150	71.5	fourth stadial phase of the Würm glacial period			15.5628	16.6163	13.1568	10.653	6.23992	10.4483
7175	71.75	fourth stadial phase of the Würm glacial period			16.3971	17.3384	13.3159	9.88623	5.97261	12.3079
7199	71.99	fourth stadial phase of the Würm glacial period			19.9996	21.8479	17.2928	9.39017	4.53499	9.86187
7225	72.25	fourth stadial phase of the Würm gacial period			20.2238	23.2618	19.3057	8.99397	4.53243	10.2845
7250	72.5	fourth stadial phase of the Würm glacial period			18.4386	19.9391	15.7803	7.80245	3.45039	8.85249
7275	72.75	fourth stadial phase of the Würm glacial period			20.5781	23.1164	17.8435	9.12359	4.44049	11.2701
7295	72.95	fourth stadial phase of the Würm glacial period			20.7981	22.974	19.0525	8.6454	3.47665	9.49608
7330	73.3	fourth stadial phase of the Würm glacial period			19.6265	22.145	17.5882	8.74449	3.95245	8.88591
7345	73.45	fourth stadial phase of the Würm glacial period			17.4002	19.0804	15.985	8.94399	4.6448	11.684
7350	73.5	fourth stadial phase of the Würm glacial period			18.4656	20.7311	17.4555	8.56916	2.45572	9.41698
7352	73.52	fourth stadial phase of the Würm glacial period			17.8972	20.4325	16.7147	9.60375	4.01807	10.782
7355	73.55	fourth stadial phase of the Würm glacial period			16.7316	17.851	13.9306	9.6165	4.26347	9.73214
7357	73.57	fourth stadial phase of the Würmiglacial period			16.8955	18.6292	15.5523	10.1858	5.41702	11.7949
7360	73.6	fourth stadial phase of the Würm glacial period			18.0236	19.5096	16.0295	9.40305	3.78649	10.0903
7365	73.65	fourth stadial phase of the Würm glacial period			19.9088	21.295	16.7109	9.51487	4.58528	11.0398
7380	73.8	fourth stadial phase of the Würm glacial period			18.7212	20.2353	16.0436	10.3581	5.69404	12.2435
7395	73.95	fourth stadial phase of the Würm glacial period			17.3263	18.5963	13.9401	10.6306	5.43062	10.9471
7410	74.1	fourth stadial phase of the Würm glacial period			17.3493	18.2964	12.6768	11.4494	6.28832	10.3246
7412	74.12	fourth stadial phase of the Würm glacial period		66.6672	17.1826	18.1649	13.8165	12.5449	7.24675	11.0622
7413	74.13	third interstadial phase of the Würm glacial period		66.8528	18.3749	19.5691	12.6839	9.43792	2.51976	6.45162
7414	74.14	third interstadial phase of the Würm glacial period		67.0384	18.3496	18.8705	11.4305	9.18435	1.76998	4.1701
7416	74.16	third interstadial phase of the Würm glacial period		67.4096	18.0949	18.6101	11.4745	9.30354	2.25127	5.21259
7420	74.2	third interstadial phase of the Würm glacial period		68.152	18.6827	19.4094	12.5156	9.26686	2.67916	6.69449
7422	74.22	third interstadial phase of the Würm glacial period		68.5232	18.4721	19.0702	10.8694	7.79889	1.55404	5.09237
7424	74.24	third interstadial phase of the Würm glacial period		68.8944	18.579	19.3247	10.5215	8.17283	2.13004	4.12689
7425	74.25	third interstadial phase of the Würm glacial period		69.08	19.684	20.2727	11.1392	8.33554	2.13273	5.78411
7427	74.27	third interstadial phase of the Würm glacial period		69.4512	19.3163	19.9113	12.3236	8.60438	1.8338	5.76715
7428.5	74.285	third interstadial phase of the Würm glacial period		69.7296	18.356	18.8689	11.3964	9.00534	1.97159	5.23605
7430	74.3	third interstadial phase of the Würm glacial period		70.008	19.7474	20.5286	13.1138	9.73223	3.26995	8.25725
7432	74.32	third stadial phase of the Würm glacial period	MIS 4	70.3792	20.2671	22.3264	17.626	8.95969	2.53914	7.85636
7435	74.35	third stadial phase of the Würm glacial period	MIS 4	70.936	20.3065	21.8571	17.738	9.49403	3.87952	11.2438
7437.5	74.375	third stadial phase of the Würm glacial period	MIS 4	71.4	18.1644	19.8384	16.2926	10.2378	4.29399	10.3024
7440	74.4	third stadial phase of the Würm glacial period	MIS 4	71.864	21.3703	22.892	18.7006	12.0122	4.73994	10.3055
7442	74.42	second interstadial phase of the Würm glacial period	MIS 5a	72.2352	19.0452	20.7211	16.4918	11.438	3.87952	9.59932
7445	74.45	second interstadial phase of the Würm glacial period	MIS 5a	72.792	16.9218	17.5162	12.1551	11.412	4.32843	7.77125
7447	74.47	second interstadial phase of the Würm glacial period	MIS 5a	73.1632	17.5411	18.4601	12.1216	10.5518	3.22002	6.77996
7450	74.5	second interstadial phase of the Würm glacial period	MIS 5a	73.72	18.5871	19.2471	10.8576	8.67873	1.96471	4.49409
7455	74.55	second interstadial phase of the Würm glacial period	MIS 5a	74.648	18.56	19.4267	11.4723	8.07704	1.6421	4.13735
7460	74.6	second interstadial phase of the Würm glacial period	MIS 5a	75.576	18.3525	19.6642	11.8252	8.44598	1.66037	3.93378
7465	74.65	second interstadial phase of the Würm glacial period	MIS 5a	76.504	19.7011	20.52	11.5674	8.23524	2.03726	4.9469
7470	74.7	second interstadial phase of the Würm glacial period	MIS 5a	77.432	22.1504	24.3249	16.7063	6.99167	1.69578	7.18204
7475	74.75	second interstadial phase of the Würm glacial period	MIS 5a	78.36	20.2973	22.1588	13.8057	6.27346	1.25863	5.11341
7480	74.8	second interstadial phase of the Würm glacial period	MIS 5a	79.288	22.3541	25.0898	18.4544	7.87858	2.42362	6.43068
7485	74.85	second interstadial phase of the Würm glacial period	MIS 5a	80.216	21.5728	24.5114	17.4086	8.33205	2.55571	6.3976
7487	74.87	second interstadial phase of the Würm glacial period	MIS 5a	80.5872	21.3561	24.2996	17.4932	7.57782	1.86325	5.58469
7490	74.9	second interstadial phase of the Würm glacial period	MIS 5a	81.144	21.0241	24.1779	19.1494	9.22927	2.02523	6.73809
7495	74.95	second interstadial phase of the Würm glacial period	MIS 5a	82.072	20.0778	23.0509	19.004	8.99159	1.64997	7.09588
7501	75.01	second interstadial phase of the Würm glacial period	MIS 5a	83.1856	20.0429	22.8419	19.3711	10.0508	1.71287	6.07906
7502.5	75.025	second interstadial phase of the Würm glacial period	MIS 5a	83.464	18.5755	20.6439	17.89	10.0527	1.4986	6.63092
7505	75.05	second interstadial phase of the Würm glacial period	MIS 5a	83.928	18.0989	19.5505	16.4443	11.5006	1.88455	6.03217
7507.5	75.075	second interstadial phase of the Würm glacial period	MIS 5a	84.392	18.1551	19.4112	16.9065	11.1111	1.67108	6.63741
7510	75.1	second interstadial phase of the Würm glacial period	MIS 5a	84.856	15.7614	16.1696	13.7019	10.8631	1.51342	5.09367
7510.5	75.105	second interstadial phase of the Würm glacial period	MIS 5a	84.9488	18.556	18.556	15.0121	13.0433	3.98999	9.30667
7511	75.11	second interstadial phase of the Würm glacial period	MIS 5a	85.0416	19.3499	19.8476	15.4858	11.855	4.03066	11.4995
7512	75.12	second interstadial phase of the Würm glacial period	MIS 5a	85.2272	18.8791	19.6382	14.8144	12.7246	5.58808	10.6304
7513.5	75.135	second interstadial phase of the Würm glacial period	MIS 5a	85.5056	17.5655	18.4429	15.2702	12.5933	6.19266	12.0953
7516.5	75.165	second stadial phase of the Würm glacial period	MIS 5b	86.0624	18.2049	19.9143	16.4443	11.6742	6.20286	11.3737
7520	75.2	second stadial phase of the Würm glacial period	MIS 5b	86.712	20.0255	21.5738	17.2489	11.6472	6.34799	11.8702
7522	75.22	second stadial phase of the Würm glacial period	MIS 5b	87.0832	17.1044	18.773	14.8765	11.9605	6.0498	9.52522
7526	75.26	second stadial phase of the Würm glacial period	MIS 5b	87.8256	19.0038	20.3693	15.2542	12.5849	6.06375	8.61287
7527	75.27	first interstadial phase of the Würm glacial period	MIS 5c	88.0112	18.4817	19.2528	12.996	8.98686	1.01876	4.64593
7528	75.28	first interstadial phase of the Würm glacial period	MIS 5c	88.1968	18.1763	18.6295	12.2922	9.061	0.961262	3.26254
7529	75.29	first interstadial phase of the Würm glacial period	MIS 5c	88.3824	20.8879	21.8214	13.132	7.96189	1.65419	4.49088
7530	75.3	first interstadial phase of the Würm glacial period	MIS 5c	88.568	20.0878	21.2736	12.8777	8.53007	2.26976	4.6883
7535	75.35	first interstadial phase of the Würm glacial period	MIS 5c	89.496	19.9183	20.7949	12.0498	7.02974	0.693042	3.35703
7540	75.4	first interstadial phase of the Würm glacial period	MIS 5c	90.424	18.0901	19.2611	11.5668	8.03749	2.14386	4.4045
7545	75.45	first interstadial phase of the Würm glacial period	MIS 5c	91.352	18.4662	19.3033	11.0077	7.716	1.04933	3.74005
7550	75.5	first interstadial phase of the Würm glacial period	MIS 5c	92.28	18.7591	19.5831	13.0315	9.95787	2.24365	4.48935
7555	75.55	first interstadial phase of the Würm glacial period	MIS 5c	93.208	18.7981	19.6416	11.4408	8.69659	1.18204	3.51933
7560	75.6	first interstadial phase of the Würm glacial period	MIS 5c	94.136	19.5037	20.2349	12.5049	8.30874	1.36809	4.26853
7565	75.65	first interstadial phase of the Würm glacial period	MIS 5c	95.064	21.3014	22.2834	14.392	9.11692	2.42661	5.05761
7570	75.7	first interstadial phase of the Würm glacial period	MIS 5c	95.992	21.3443	22.2538	12.6721	7.39366	1.33826	4.21505
7575	75.75	first interstadial phase of the Würm glacial period	MIS 5c	96.92	20.4192	21.9763	13.5007	9.05265	2.05722	3.84549
7580	75.8	first interstadial phase of the Würm glacial period	MIS 5c	97.848	20.7644	21.6597	12.9731	7.56821	1.69633	5.01539
7585	75.85	first interstadial phase of the Würm glacial period	MIS 5c	98.776	21.6017	23.1512	13.2571	7.5836	2.08611	4.83883
7590	75.9	first interstadial phase of the Würm glacial period	MIS 5c	99.704	20.6443	21.1678	11.0655	6.0869	0.977936	4.21826
7594	75.94	first interstadial phase of the Würm glacial period	MIS 5c	100.446	21.2767	22.3422	12.4658	6.14216	1.32772	4.95621
7598	75.98	first interstadial phase of the Würm glacial period	MIS 5c	101.189	20.9569	22.4032	12.0093	5.83936	1.00575	4.03065
7602	76.02	first interstadial phase of the Würm glacial period	MIS 5c	101.931	21.7078	23.6606	12.6457	5.05562	0.931156	4.72193
7607	76.07	first interstadial phase of the Würm glacial period	MIS 5c	102.859	20.8954	22.5283	11.8197	5.65172	1.26604	3.22851
7610	76.1	first interstadial phase of the Würm glacial period	MIS 5c	103.416	21.0731	23.1077	14.5178	5.09695	1.63052	5.54586
7613	76.13	first interstadial phase of the Würm glacial period	MIS 5c	103.973	19.6586	21.67	12.6436	5.05036	1.46909	4.63718
7615	76.15	first interstadial phase of the Würm glacial period	MIS 5c	104.344	20.0783	21.9128	13.5049	6.36187	1.44476	4.80858
7618.5	76.185	first interstadial phase of the Würm glacial period	MIS 5c	104.994	19.932	22.064	15.0655	6.96862	1.13961	5.73293
7620	76.2	first interstadial phase of the Würm glacial period	MIS 5c	105.272	20.6044	23.0435	15.5844	8.12692	1.54823	5.4439
7624	76.24	first interstadial phase of the Würm glacial period	MIS 5c	106.014	20.5773	22.9915	15.9242	7.64578	1.50521	5.29679
7625.5	76.255	first interstadial phase of the Würm glacial period	MIS 5c	106.293	21.2769	23.4325	18.2171	9.03049	2.5176	8.68147
7627	76.27	first interstadial phase of the Würm glacial period	MIS 5c	106.571	21.2971	23.142	17.8034	9.38497	2.07923	7.96071
7630	76.3	first interstadial phase of the Würm glacial period	MIS 5c	107.128	18.8413	19.3537	13.8408	9.38726	1.969	6.30723
7634	76.34	first interstadial phase of the Würm glacial period	MIS 5c	107.87	16.8637	17.3024	12.4966	10.186	1.65592	4.80319
7638	76.38	first interstadial phase of the Würm glacial period	MIS 5c	108.613	19.4832	20.6001	16.7911	10.2762	2.25749	6.60364
7645	76.45	first interstadial phase of the Würm glacial period	MIS 5c	109.912	18.4506	19.4368	15.1044	11.0464	2.98939	7.22597
7650	76.5	first interstadial phase of the Würm glacial period	MIS 5c	110.84	18.6529	21.2701	16.572	9.11783	0.94239	5.793
7653	76.53	first interstadial phase of the Würm glacial period	MIS 5c	111.397	19.5698	20.9176	16.7614	9.50251	1.28696	6.7451
7659	76.59	first interstadial phase of the Würm glacial period	MIS 5c	112.51	17.4122	17.714	15.036	11.3076	2.11153	7.05086
7660	76.6	first stadial phase of the Würm glacial period	MIS 5d	112.696	21.7577	24.7545	19.782	9.52416	4.5801	10.334
7664	76.64	first stadial phase of the Würm glacial period	MIS 5d	113.438	22.6821	24.6261	19.2403	10.3115	5.1607	10.7468
7670	76.7	first stadial phase of the Würm glacial period	MIS 5d	114.552	22.0284	23.1856	16.4676	9.18691	4.56746	9.39161
7676	76.76	first stadial phase of the Würm glacial period	MIS 5d	115.666	19.8108	21.2762	15.6231	10.2288	4.25209	8.64476
7677	76.77	first stadial phase of the Würm glacial period	MIS 5d	115.851	19.2802	19.8911	13.5175	8.13436	1.72774	6.18727
7680	76.8	Riss/Würm interglacial period	MIS 5e	116.408	19.8516	20.9367	15.4182	10.1919	2.77334	6.14099
7685	76.85	Riss/Würm interglacial period	MIS 5e	117.336	20.1826	21.7159	15.0277	8.67594	1.2304	4.49675
7690	76.9	Riss/Würm interglacial period	MIS 5e	118.264	20.2172	21.6098	14.8021	9.03326	1.79538	5.61732
7691	76.91	Riss/Würm interglacial period	MIS 5e	118.45	21.6489	23.6315	13.0578	5.50451	0.704645	3.39498
7692	76.92	Riss/Würm interglacial period	MIS 5e	118.635	20.585	22.4795	10.1688	4.19361	1.08919	2.52918
7693	76.93	Riss/Würm interglacial period	MIS 5e	118.821	21.7464	24.9776	13.207	3.51244	0.579284	4.19154
7694	76.94	Riss/Würm interglacial period	MIS 5e	119.006	23.0468	26.4808	15.0343	4.01372	1.5879	4.77092
7699	76.99	Riss/Würm interglacial period	MIS 5e	119.934	24.3146	27.7826	17.9098	2.92299	0.731244	4.74059
7705	77.05	Riss/Würm interglacial period	MIS 5e	121.048	24.0466	27.2092	16.6095	2.45908	0.428157	3.65557
7710	77.1	Riss/Würm interglacial period	MIS 5e	121.976	23.3786	26.7583	15.9223	2.59422	0.733604	3.20175
7712	77.12	Riss/Würm interglacial period	MIS 5e	122.347	24.4785	29.0225	18.8195	2.72942	0.434372	4.54779
7715	77.15	Riss/Würm interglacial period	MIS 5e	122.904	23.5962	28.7887	18.4556	2.30016	0.310236	3.86156
7718	77.18	Riss/Würm interglacial period	MIS 5e	123.461	20.9553	27.3249	18.1455	3.31707	1.23655	3.84606
7722	77.22	Riss/Würm interglacial period	MIS 5e	124.203	19.9677	26.2579	17.0031	3.11057	0.309344	2.18739
7724	77.24	Riss/Würm interglacial period	MIS 5e	124.574	19.2456	23.328	16.0933	2.79893	1.39766	3.07469
7725	77.25	Riss/Würm interglacial period	MIS 5e	124.76	20.3897	26.033	18.9792	3.02235	0.962246	3.13459
7726.5	77.265	Riss/Würm interglacial period	MIS 5e	125.038	17.2101	23.6061	18.906	2.99956	0.869565	2.37042
7730	77.3	Riss/Würm interglacial period	MIS 5e	125.688	17.0819	23.3092	21.1062	7.50975	1.10463	3.30983
