# Supplementary material for: Terrestrial biosphere changes over the last 120 kyr
Source: Copernicus journal article supplement (doi:10.5194/cp-12-51-2016), 2016-01-18
Supplement: Supplementary file 1 [file cp-12-51-2016-supplement.zip › supplement/Europe/BiomizationAlpsPrenticeetal.xls]

## Sheet: REGIONAL BIOMIZATION
		Boreal evergreen conifer	Boreal summer green	Cool-temperate conifer	Intermediate temperate conifer	Eurythermic conifer	Temperate summer green	Cool-temperate summer green	Warm-temperate summer green	Warm-temperate broad-leaved evergreen	Cool-temperate broad-leaved evergreen	Warm-temperate sclerophyll shrub	Steppe forb	Desert forb	Arctic-alpine dwarf shrub	Grass	Sedge	Heath		BIOMES													BIOMES
		bec	bs	ctc	ctc1	ec	ts	ts1	ts2	wte	wte1	wte2	sf	df	aa	g	s	h		Cold deciduous forest	Taiga	Cold mixed fores	Cool conifer forest	Temperate deciduous forest	Cool mixed forest	Broad-lvd evergreen/warm mixed forest	Xerophytic woods/scrub	Steppe	Desert	Tundra		SQRT	Cold deciduous forest	Taiga	Cold mixed fores	Cool conifer forest	Temperate deciduous forest	Cool mixed forest	Broad-lvd evergreen/warm mixed forest	Xerophytic woods/scrub	Steppe	Desert	Tundra
Abies	Abies	1		1																0	1	1	1	1	1	0	0	0	0	0		0	0	0	0	0	0	0	0	0	0	0	0
Acer	Acer						1													0	0	0	0	1	1	1	0	0	0	0		0	0	0	0	0	0	0	0	0	0	0	0
Alnus glutinosa/incana - Typ	Alnus		1				1								1					1	1	1	1	1	1	1	0	0	0	1		0.312959	0.312959	0.312959	0.312959	0.312959	0.312959	0.312959	0.312959	0	0	0	0.312959
Alnus viridis	Alnus		1				1								1					1	1	1	1	1	1	1	0	0	0	1		0	0	0	0	0	0	0	0	0	0	0	0
Armeria																																0	0	0	0	0	0	0	0	0	0	0	0
Artemisia	Artemisia												1							0	0	0	0	0	0	0	0	1	1	0		3.71618	0	0	0	0	0	0	0	0	3.71618	3.71618	0
Betula	Betula		1												1					1	1	1	1	1	1	0	0	0	0	1		3.1139	3.1139	3.1139	3.1139	3.1139	3.1139	3.1139	0	0	0	0	3.1139
Botrychium																																0.54206	0	0	0	0	0	0	0	0	0	0	0
Buxus	Buxus										1									0	0	0	0	1	0	1	0	0	0	0		0	0	0	0	0	0	0	0	0	0	0	0
Calluna																																0	0	0	0	0	0	0	0	0	0	0	0
Campanula																																0	0	0	0	0	0	0	0	0	0	0	0
Carpinus	Carpinus							1												0	0	1	1	1	1	1	0	0	0	0		0	0	0	0	0	0	0	0	0	0	0	0
Caryophyllaceae p.p.																																0.54206	0	0	0	0	0	0	0	0	0	0	0
Centaurea jacea-Typ																																0.312959	0	0	0	0	0	0	0	0	0	0	0
Centaurea montana Typ																																0	0	0	0	0	0	0	0	0	0	0	0
cf. Impatiens																																0	0	0	0	0	0	0	0	0	0	0	0
cf. Populus	Populus		1				1													1	1	1	1	1	1	1	0	0	0	0		0	0	0	0	0	0	0	0	0	0	0	0
cf. Potamogeton																																0	0	0	0	0	0	0	0	0	0	0	0
Chenopodiaceae	Chenopodiaceae												1							0	0	0	0	0	0	0	0	1	1	0		1.03797	0	0	0	0	0	0	0	0	1.03797	1.03797	0
Compositae liguliflorae																																0.54206	0	0	0	0	0	0	0	0	0	0	0
Compositae tubuliflorae																																0	0	0	0	0	0	0	0	0	0	0	0
Corylus	Corylus							1												0	0	1	1	1	1	1	0	0	0	0		0	0	0	0	0	0	0	0	0	0	0	0
Cruciferae																																0	0	0	0	0	0	0	0	0	0	0	0
Cyperaceae	Cyperaceae																1			0	0	0	0	0	0	0	0	0	0	1		3.49899	0	0	0	0	0	0	0	0	0	0	3.49899
Dipsacaceae																																0	0	0	0	0	0	0	0	0	0	0	0
Dryopteris thelypteris																																0	0	0	0	0	0	0	0	0	0	0	0
Ephedra distachya - Typ	Ephedra													1						0	0	0	0	0	0	0	0	0	1	0		0.442591	0	0	0	0	0	0	0	0	0	0.442591	0
Ephedra fragilis -Typ	Ephedra													1						0	0	0	0	0	0	0	0	0	1	0		0	0	0	0	0	0	0	0	0	0	0	0
Epilobium																																0	0	0	0	0	0	0	0	0	0	0	0
Equisetum																																0	0	0	0	0	0	0	0	0	0	0	0
Ericaceae p.p.																																0	0	0	0	0	0	0	0	0	0	0	0
Fagus	Fagus							1												0	0	1	1	1	1	1	0	0	0	0		0	0	0	0	0	0	0	0	0	0	0	0
Filipendula																																0	0	0	0	0	0	0	0	0	0	0	0
Fraxinus																																0	0	0	0	0	0	0	0	0	0	0	0
Geranium																																0	0	0	0	0	0	0	0	0	0	0	0
Gramineae	Poaceae															1				0	0	0	0	0	0	0	0	1	1	1		2.32096	0	0	0	0	0	0	0	0	2.32096	2.32096	2.32096
Gypsophila																																0	0	0	0	0	0	0	0	0	0	0	0
Hedera	Hedera										1									0	0	0	0	1	0	1	0	0	0	0		0	0	0	0	0	0	0	0	0	0	0	0
Helianthemum																																1.08412	0	0	0	0	0	0	0	0	0	0	0
Hippophae																																0.625918	0	0	0	0	0	0	0	0	0	0	0
Huperzia selago																																0	0	0	0	0	0	0	0	0	0	0	0
Ilex	Ilex										1									0	0	0	0	1	0	1	0	0	0	0		0	0	0	0	0	0	0	0	0	0	0	0
Indeterminata																																0.312959	0	0	0	0	0	0	0	0	0	0	0
Juniperus	Juniperus					1														1	1	1	1	1	1	1	1	0	0	0		0.766589	0.766589	0.766589	0.766589	0.766589	0.766589	0.766589	0.766589	0.766589	0	0	0
Knautia																																0	0	0	0	0	0	0	0	0	0	0	0
Labiatae																																0	0	0	0	0	0	0	0	0	0	0	0
Larix	Larix		1																	1	1	1	1	1	1	0	0	0	0	0		0	0	0	0	0	0	0	0	0	0	0	0
Liliaceae																																0	0	0	0	0	0	0	0	0	0	0	0
Lonicera periclymenum																																0	0	0	0	0	0	0	0	0	0	0	0
Lycopodium annotinum - Typ																																0	0	0	0	0	0	0	0	0	0	0	0
Lycopodium clavatum -Typ																																0	0	0	0	0	0	0	0	0	0	0	0
Nymphaea																																0	0	0	0	0	0	0	0	0	0	0	0
Osmunda																																0	0	0	0	0	0	0	0	0	0	0	0
Oxyria-Typ																																0	0	0	0	0	0	0	0	0	0	0	0
Papilionaceae																																0	0	0	0	0	0	0	0	0	0	0	0
Picea	Picea	1																		0	1	0	1	0	1	0	0	0	0	0		0.442591	0	0.442591	0	0.442591	0	0.442591	0	0	0	0	0
Picea cf. omorika	Picea	1																		0	1	0	1	0	1	0	0	0	0	0		0	0	0	0	0	0	0	0	0	0	0	0
Pinus	Pinus (Diploxylon)					1														1	1	1	1	1	1	1	1	0	0	0		7.08836	7.08836	7.08836	7.08836	7.08836	7.08836	7.08836	7.08836	7.08836	0	0	0
Pinus cembra m. verrucae	Pinus (Haploxylon)	1																		0	1	0	1	0	1	0	0	0	0	0		0	0	0	0	0	0	0	0	0	0	0	0
Plantago major-media-Typ																																0	0	0	0	0	0	0	0	0	0	0	0
Plantago maritima -Typ																																0	0	0	0	0	0	0	0	0	0	0	0
Plantago montana -Typ																																0	0	0	0	0	0	0	0	0	0	0	0
Plantago species																																0	0	0	0	0	0	0	0	0	0	0	0
Polygonum bistorta-Typ																																0	0	0	0	0	0	0	0	0	0	0	0
Polygonum persicaria -Typ																																0	0	0	0	0	0	0	0	0	0	0	0
Polygonum species																																0	0	0	0	0	0	0	0	0	0	0	0
Polypodiaceae																																0.312959	0	0	0	0	0	0	0	0	0	0	0
Polypodium																																0	0	0	0	0	0	0	0	0	0	0	0
Pteridium																																0	0	0	0	0	0	0	0	0	0	0	0
Quercus	Quercus (deciduous)						1													0	0	0	0	1	1	1	0	0	0	0		0	0	0	0	0	0	0	0	0	0	0	0
Ranunculaceae p.p.																																0	0	0	0	0	0	0	0	0	0	0	0
Ranunculus p.p.																																0	0	0	0	0	0	0	0	0	0	0	0
Rhamnus frangula	Rhamnus								1											0	0	0	0	1	0	1	0	0	0	0		0	0	0	0	0	0	0	0	0	0	0	0
Rosaceae																																0.312959	0	0	0	0	0	0	0	0	0	0	0
Rubiaceae																																0	0	0	0	0	0	0	0	0	0	0	0
Rumex																																0	0	0	0	0	0	0	0	0	0	0	0
Salix	Salix		1				1								1					1	1	1	1	1	1	1	0	0	0	1		0.828011	0.828011	0.828011	0.828011	0.828011	0.828011	0.828011	0.828011	0	0	0	0.828011
Sanguisorba minor																																0	0	0	0	0	0	0	0	0	0	0	0
Sanguisorba officinalis																																0	0	0	0	0	0	0	0	0	0	0	0
Saxifraga oppositifolia-Typ																																0	0	0	0	0	0	0	0	0	0	0	0
Scabiosa																																0	0	0	0	0	0	0	0	0	0	0	0
Scrophulariaceae																																0	0	0	0	0	0	0	0	0	0	0	0
Selaginella selaginoides																																0.442591	0	0	0	0	0	0	0	0	0	0	0
Sparganium-Typ																																0	0	0	0	0	0	0	0	0	0	0	0
Sphagnum																																0	0	0	0	0	0	0	0	0	0	0	0
Succisa																																0	0	0	0	0	0	0	0	0	0	0	0
Syringa																																0	0	0	0	0	0	0	0	0	0	0	0
Taxus	Taxus				1															0	0	1	0	1	0	0	0	0	0	0		0	0	0	0	0	0	0	0	0	0	0	0
Thalictrum																																1.36416	0	0	0	0	0	0	0	0	0	0	0
Tilia	Tilia							1												0	0	1	1	1	1	1	0	0	0	0		0	0	0	0	0	0	0	0	0	0	0	0
Typha latifolia-Typ																																0	0	0	0	0	0	0	0	0	0	0	0
Ulmus	Ulmus							1												0	0	1	1	1	1	1	0	0	0	0		0	0	0	0	0	0	0	0	0	0	0	0
Umbelliferae																																0.54206	0	0	0	0	0	0	0	0	0	0	0
Valeriana officinalis s.l.Typ																																0	0	0	0	0	0	0	0	0	0	0	0
Varia																																0.766589	0	0	0	0	0	0	0	0	0	0	0
Viscum																																0	0	0	0	0	0	0	0	0	0	0	0
Vitis	Vitis								1											0	0	0	0	1	0	1	0	0	0	0		0	0	0	0	0	0	0	0	0	0	0	0
																																	12.1098	12.5524	12.1098	12.5524	12.1098	12.5524	8.99592	7.85495	7.07511	7.5177	10.0748

## Sheet: Samerberg
		Boreal evergreen conifer	Boreal summer green	Cool-temperate conifer	Intermediate temperate conifer	Eurythermic conifer	Temperate summer green	Cool-temperate summer green	Warm-temperate summer green	Warm-temperate broad-leaved evergreen	Cool-temperate broad-leaved evergreen	Warm-temperate sclerophyll shrub	Steppe forb	Desert forb	Arctic-alpine dwarf shrub	Grass	Sedge	Heath			Megabiomes									Megabiomes
		bec	bs	ctc	ctc1	ec	ts	ts1	ts2	wte	wte1	wte2	sf	df	aa	g	s	h			boreal forest	temperate forest	warm-temperate forest	grassland and dry shrubland	desert	tundra			sqrt	boreal forest	temperate forest	warm-temperate forest	grassland and dry shrubland	desert	tundra
Abies	Abies			1																	1	1	0	0	0	0			0	0	0	0	0	0	0
Acer	Acer						1														0	1	1	0	0	0			0	0	0	0	0	0	0
Alnus glutinosa/incana - Typ	Alnus		1				1								1						1	1	1	0	0	1			0.312959	0.312959	0.312959	0.312959	0	0	0.312959
Alnus viridis	Alnus		1				1								1						1	1	1	0	0	1			0	0	0	0	0	0	0
Armeria																					0	0	0	0	0	0			0	0	0	0	0	0	0
Artemisia	Artemisia												1								0	0	0	1	1	0			3.71618	0	0	0	3.71618	3.71618	0
Betula	Betula		1				1								1						1	1	1	0	0	1			3.1139	3.1139	3.1139	3.1139	0	0	3.1139
Botrychium																					0	0	0	0	0	0			0.54206	0	0	0	0	0	0
Buxus	Buxus									1	1										0	1	1	1	0	0			0	0	0	0	0	0	0
Calluna																					0	0	0	0	0	0			0	0	0	0	0	0	0
Campanula																					0	0	0	0	0	0			0	0	0	0	0	0	0
Carpinus	Carpinus							1													1	1	1	0	0	0			0	0	0	0	0	0	0
Caryophyllaceae p.p.																					0	0	0	0	0	0			0.54206	0	0	0	0	0	0
Centaurea jacea-Typ																					0	0	0	0	0	0			0.312959	0	0	0	0	0	0
Centaurea montana Typ																					0	0	0	0	0	0			0	0	0	0	0	0	0
cf. Impatiens																					0	0	0	0	0	0			0	0	0	0	0	0	0
cf. Populus	Populus		1				1	1													1	1	1	0	0	0			0	0	0	0	0	0	0
cf. Potamogeton																					0	0	0	0	0	0			0	0	0	0	0	0	0
Chenopodiaceae	Chenopodiaceae												1								0	0	0	1	1	0			1.03797	0	0	0	1.03797	1.03797	0
Compositae liguliflorae																					0	0	0	0	0	0			0.54206	0	0	0	0	0	0
Compositae tubuliflorae																					0	0	0	0	0	0			0	0	0	0	0	0	0
Corylus	Corylus							1													1	1	1	0	0	0			0	0	0	0	0	0	0
Cruciferae																					0	0	0	0	0	0			0	0	0	0	0	0	0
Cyperaceae	Cyperaceae																1				0	0	0	0	0	1			3.49899	0	0	0	0	0	3.49899
Dipsacaceae																					0	0	0	0	0	0			0	0	0	0	0	0	0
Dryopteris thelypteris																					0	0	0	0	0	0			0	0	0	0	0	0	0
Ephedra distachya - Typ	Ephedra												1	1							0	0	0	1	1	0			0.442591	0	0	0	0.442591	0.442591	0
Ephedra fragilis -Typ	Ephedra												1	1							0	0	0	1	1	0			0	0	0	0	0	0	0
Epilobium																					0	0	0	0	0	0			0	0	0	0	0	0	0
Equisetum																					0	0	0	0	0	0			0	0	0	0	0	0	0
Ericaceae p.p.																					0	0	0	0	0	0			0	0	0	0	0	0	0
Fagus	Fagus							1													1	1	1	0	0	0			0	0	0	0	0	0	0
Filipendula																					0	0	0	0	0	0			0	0	0	0	0	0	0
Fraxinus																					0	0	0	0	0	0			0	0	0	0	0	0	0
Geranium																					0	0	0	0	0	0			0	0	0	0	0	0	0
Gramineae	Poaceae															1					0	0	0	1	1	1			2.32096	0	0	0	2.32096	2.32096	2.32096
Gypsophila																					0	0	0	0	0	0			0	0	0	0	0	0	0
Hedera	Hedera										1										0	1	1	0	0	0			0	0	0	0	0	0	0
Helianthemum																					0	0	0	0	0	0			1.08412	0	0	0	0	0	0
Hippophae																					0	0	0	0	0	0			0.625918	0	0	0	0	0	0
Huperzia selago																					0	0	0	0	0	0			0	0	0	0	0	0	0
Ilex	Ilex										1										0	1	1	0	0	0			0	0	0	0	0	0	0
Indeterminata																					0	0	0	0	0	0			0.312959	0	0	0	0	0	0
Juniperus	Juniperus					1															1	1	1	1	0	0			0.766589	0.766589	0.766589	0.766589	0.766589	0	0
Knautia																					0	0	0	0	0	0			0	0	0	0	0	0	0
Labiatae																					0	0	0	0	0	0			0	0	0	0	0	0	0
Larix	Larix		1																		1	1	0	0	0	0			0	0	0	0	0	0	0
Liliaceae																					0	0	0	0	0	0			0	0	0	0	0	0	0
Lonicera periclymenum																					0	0	0	0	0	0			0	0	0	0	0	0	0
Lycopodium annotinum - Typ																					0	0	0	0	0	0			0	0	0	0	0	0	0
Lycopodium clavatum -Typ																					0	0	0	0	0	0			0	0	0	0	0	0	0
Nymphaea																					0	0	0	0	0	0			0	0	0	0	0	0	0
Osmunda																					0	0	0	0	0	0			0	0	0	0	0	0	0
Oxyria-Typ																					0	0	0	0	0	0			0	0	0	0	0	0	0
Papilionaceae																					0	0	0	0	0	0			0	0	0	0	0	0	0
Picea	Picea	1																			1	1	0	0	0	0			0.442591	0.442591	0.442591	0	0	0	0
Picea cf. omorika	Picea	1																			1	1	0	0	0	0			0	0	0	0	0	0	0
Pinus	Pinus (Diploxylon)					1															1	1	1	1	0	0			7.08836	7.08836	7.08836	7.08836	7.08836	0	0
Pinus cembra m. verrucae	Pinus (Haploxylon)	1																			1	1	0	0	0	0			0	0	0	0	0	0	0
Plantago major-media-Typ																					0	0	0	0	0	0			0	0	0	0	0	0	0
Plantago maritima -Typ																					0	0	0	0	0	0			0	0	0	0	0	0	0
Plantago montana -Typ																					0	0	0	0	0	0			0	0	0	0	0	0	0
Plantago species																					0	0	0	0	0	0			0	0	0	0	0	0	0
Polygonum bistorta-Typ																					0	0	0	0	0	0			0	0	0	0	0	0	0
Polygonum persicaria -Typ																					0	0	0	0	0	0			0	0	0	0	0	0	0
Polygonum species																					0	0	0	0	0	0			0	0	0	0	0	0	0
Polypodiaceae																					0	0	0	0	0	0			0.312959	0	0	0	0	0	0
Polypodium																					0	0	0	0	0	0			0	0	0	0	0	0	0
Pteridium																					0	0	0	0	0	0			0	0	0	0	0	0	0
Quercus	Quercus (deciduous)						1														0	1	1	0	0	0			0	0	0	0	0	0	0
Ranunculaceae p.p.																					0	0	0	0	0	0			0	0	0	0	0	0	0
Ranunculus p.p.																					0	0	0	0	0	0			0	0	0	0	0	0	0
Rhamnus frangula	Rhamnus							1	1												1	1	1	0	0	0			0	0	0	0	0	0	0
Rosaceae																					0	0	0	0	0	0			0.312959	0	0	0	0	0	0
Rubiaceae																					0	0	0	0	0	0			0	0	0	0	0	0	0
Rumex																					0	0	0	0	0	0			0	0	0	0	0	0	0
Salix	Salix		1				1								1						1	1	1	0	0	1			0.828011	0.828011	0.828011	0.828011	0	0	0.828011
Sanguisorba minor																					0	0	0	0	0	0			0	0	0	0	0	0	0
Sanguisorba officinalis																					0	0	0	0	0	0			0	0	0	0	0	0	0
Saxifraga oppositifolia-Typ																					0	0	0	0	0	0			0	0	0	0	0	0	0
Scabiosa																					0	0	0	0	0	0			0	0	0	0	0	0	0
Scrophulariaceae																					0	0	0	0	0	0			0	0	0	0	0	0	0
Selaginella selaginoides																					0	0	0	0	0	0			0.442591	0	0	0	0	0	0
Sparganium-Typ																					0	0	0	0	0	0			0	0	0	0	0	0	0
Sphagnum																					0	0	0	0	0	0			0	0	0	0	0	0	0
Succisa																					0	0	0	0	0	0			0	0	0	0	0	0	0
Syringa																					0	0	0	0	0	0			0	0	0	0	0	0	0
Taxus	Taxus				1																1	1	0	0	0	0			0	0	0	0	0	0	0
Thalictrum																					0	0	0	0	0	0			1.36416	0	0	0	0	0	0
Tilia	Tilia							1													1	1	1	0	0	0			0	0	0	0	0	0	0
Typha latifolia-Typ																					0	0	0	0	0	0			0	0	0	0	0	0	0
Ulmus	Ulmus							1													1	1	1	0	0	0			0	0	0	0	0	0	0
Umbelliferae																					0	0	0	0	0	0			0.54206	0	0	0	0	0	0
Valeriana officinalis s.l.Typ																					0	0	0	0	0	0			0	0	0	0	0	0	0
Varia																					0	0	0	0	0	0			0.766589	0	0	0	0	0	0
Viscum																					0	0	0	0	0	0			0	0	0	0	0	0	0
Vitis	Vitis								1												0	1	1	0	0	0			0	0	0	0	0	0	0
																														12.5524	12.5524	12.1098	15.3727	7.5177	10.0748
In their original biomization scheme, Prentice et al. (1992) assigned Abies to boreal forest PFTs and biome. In the Alps Abies is not considered a boreal species, so for Alpine records we have amended the biomization scheme where Abies pollen percentages are not scored within the boreal forest biome.
Ephedra typically occurs in steppe environments in the Alps, not desert. However for all four records Ephedra contributed less than 1% to scores, and so did not heavily influence the biomization.
In the Prentice et al. (1992) scheme Larix is associated with a boreal summer-green species.
In the central Alps Larix occurs near the tree line but is not ecologically comparable to true boreal species (northern latitude species occurring where summer is short and temperatures are low).
Larix only occurs in very small percentages and therefore doesn't influence the biomization significantly.
In the Alps Betula also occurs as a temperate summer green, Buxus as a warm temperate broad-leaved evergreen, Populus as cool-temperate summer green, and Rhamnus frangula also occurs in a cool temperate summer green setting (like Fagus).

## Sheet: Wurzach
		Boreal evergreen conifer	Boreal summer green	Cool-temperate conifer	Intermediate temperate conifer	Eurythermic conifer	Temperate summer green	Cool-temperate summer green	Warm-temperate summer green	Warm-temperate broad-leaved evergreen	Cool-temperate broad-leaved evergreen	Warm-temperate sclerophyll shrub	Steppe forb	Desert forb	Arctic-alpine dwarf shrub	Grass	Sedge	Heath			Megabiomes									Megabiomes
		bec	bs	ctc	ctc1	ec	ts	ts1	ts2	wte	wte1	wte2	sf	df	aa	g	s	h			boreal forest	temperate forest	warm-temperate forest	grassland and dry shrubland	desert	tundra			sqrt	boreal forest	temperate forest	warm-temperate forest	grassland and dry shrubland	desert	tundra
Abies	Abies			1																	1	1	0	0	0	0			0	0	0	0	0	0	0
Acer	Acer						1														0	1	1	0	0	0			0	0	0	0	0	0	0
Alnus	Alnus		1				1								1						1	1	1	0	0	1			0	0	0	0	0	0	0
Anemone-Typ																					0	0	0	0	0	0			0	0	0	0	0	0	0
Anthemis type																					0	0	0	0	0	0			0	0	0	0	0	0	0
Armeria_																					0	0	0	0	0	0			0	0	0	0	0	0	0
Artemisia	Artemisia												1								0	0	0	1	1	0			0	0	0	0	0	0	0
Betula	Betula		1												1						1	1	0	0	0	1			0	0	0	0	0	0	0
Bidens type																					0	0	0	0	0	0			0	0	0	0	0	0	0
Boraginaceae																					0	0	0	0	0	0			0	0	0	0	0	0	0
Botrychium																					0	0	0	0	0	0			0	0	0	0	0	0	0
Botryococcus																					0	0	0	0	0	0			0	0	0	0	0	0	0
Buxus	Buxus									1	1										0	1	1	1	0	0			0	0	0	0	0	0	0
Calluna																					0	0	0	0	0	0			0	0	0	0	0	0	0
Campanula																					0	0	0	0	0	0			0	0	0	0	0	0	0
Carpinus	Carpinus							1													1	1	1	0	0	0			0	0	0	0	0	0	0
Caryophyllaceae																					0	0	0	0	0	0			0	0	0	0	0	0	0
Centaurea jacea-Typ																					0	0	0	0	0	0			0	0	0	0	0	0	0
Centaurea montana-Typ																					0	0	0	0	0	0			0	0	0	0	0	0	0
Chenopodiaceae	Chenopodiaceae												1								0	0	0	1	1	0			0	0	0	0	0	0	0
Cladium																					0	0	0	0	0	0			0	0	0	0	0	0	0
Compositae Liguliflorae																					0	0	0	0	0	0			0	0	0	0	0	0	0
Corylus	Corylus							1													1	1	1	0	0	0			0	0	0	0	0	0	0
Cruciferae																					0	0	0	0	0	0			0	0	0	0	0	0	0
Cyperaceae	Cyperaceae																1				0	0	0	0	0	1			0	0	0	0	0	0	0
Empetrum																					0	0	0	0	0	0			0	0	0	0	0	0	0
Ephedra distachya-Typ	Ephedra												1	1							0	0	0	1	1	0			0	0	0	0	0	0	0
Ephedra fragilis-Typ	Ephedra												1	1							0	0	0	1	1	0			0	0	0	0	0	0	0
Epilobium																					0	0	0	0	0	0			0	0	0	0	0	0	0
Equisetum																					0	0	0	0	0	0			0	0	0	0	0	0	0
Ericaceae pp.	Ericales																	1			1	1	1	0	0	1			0	0	0	0	0	0	0
Euphorbia																					0	0	0	0	0	0			0	0	0	0	0	0	0
Fagus	Fagus							1													1	1	1	0	0	0			0	0	0	0	0	0	0
Filipendula																					0	0	0	0	0	0			0	0	0	0	0	0	0
Frangula alnus	Frangula							1													1	1	1	0	0	0			0	0	0	0	0	0	0
Fraxinus																					0	0	0	0	0	0			0	0	0	0	0	0	0
Geranium																					0	0	0	0	0	0			0	0	0	0	0	0	0
Gramineae	Poaceae															1					0	0	0	1	1	1			0	0	0	0	0	0	0
Hedera	Hedera										1										0	1	1	0	0	0			0	0	0	0	0	0	0
Helianthemum																					0	0	0	0	0	0			0	0	0	0	0	0	0
Hippophae																					0	0	0	0	0	0			0	0	0	0	0	0	0
Humulus/Cannabis-Typ																					0	0	0	0	0	0			0	0	0	0	0	0	0
Ilex	Ilex										1										0	1	1	0	0	0			0	0	0	0	0	0	0
Indeterminata																					0	0	0	0	0	0			0	0	0	0	0	0	0
Juniperus-Typ	Juniperus					1															1	1	1	1	0	0			0	0	0	0	0	0	0
Knautia																					0	0	0	0	0	0			0	0	0	0	0	0	0
Lamiaceae pp.																					0	0	0	0	0	0			0	0	0	0	0	0	0
Larix	Larix		1																		1	1	0	0	0	0			0	0	0	0	0	0	0
Liliaceae																					0	0	0	0	0	0			0	0	0	0	0	0	0
Lycopodium																					0	0	0	0	0	0			0	0	0	0	0	0	0
Mentha-Typ																					0	0	0	0	0	0			0	0	0	0	0	0	0
Menyanthes																					0	0	0	0	0	0			0	0	0	0	0	0	0
Myriophyllum alterniflorum																					0	0	0	0	0	0			0	0	0	0	0	0	0
Myriophyllum vert./spicat.																					0	0	0	0	0	0			0	0	0	0	0	0	0
Nymphaea																					0	0	0	0	0	0			0	0	0	0	0	0	0
Onagraceae																					0	0	0	0	0	0			0	0	0	0	0	0	0
Osmunda																					0	0	0	0	0	0			0	0	0	0	0	0	0
Oxyria-Typ																					0	0	0	0	0	0			0	0	0	0	0	0	0
Pediastrum boryanum																					0	0	0	0	0	0			0	0	0	0	0	0	0
Picea	Picea	1																			1	1	0	0	0	0			0	0	0	0	0	0	0
Pinus	Pinus (Diploxylon)					1															1	1	1	1	0	0			0	0	0	0	0	0	0
Pinus cembra	Pinus (Haploxylon)	1																			1	1	0	0	0	0			0	0	0	0	0	0	0
Plantago major/media Typ																					0	0	0	0	0	0			0	0	0	0	0	0	0
Plantago maritima-Typ																					0	0	0	0	0	0			0	0	0	0	0	0	0
Polemonium																					0	0	0	0	0	0			0	0	0	0	0	0	0
Polygonum aviculare-Typ																					0	0	0	0	0	0			0	0	0	0	0	0	0
Polygonum bistorta-Typ																					0	0	0	0	0	0			0	0	0	0	0	0	0
Polypodiaceae																					0	0	0	0	0	0			0	0	0	0	0	0	0
Polypodium																					0	0	0	0	0	0			0	0	0	0	0	0	0
Populus	Populus		1				1	1													1	1	1	0	0	0			0	0	0	0	0	0	0
Potamogeton																					0	0	0	0	0	0			0	0	0	0	0	0	0
Pteridium																					0	0	0	0	0	0			0	0	0	0	0	0	0
Quercus	Quercus (deciduous)						1														0	1	1	0	0	0			0	0	0	0	0	0	0
Ranunculus-Typ																					0	0	0	0	0	0			0	0	0	0	0	0	0
Rosaceae pp.																					0	0	0	0	0	0			0	0	0	0	0	0	0
Rubiaceae																					0	0	0	0	0	0			0	0	0	0	0	0	0
Rumex																					0	0	0	0	0	0			0	0	0	0	0	0	0
Salix	Salix		1				1								1						1	1	1	0	0	1			0	0	0	0	0	0	0
Sanguisorba minor																					0	0	0	0	0	0			0	0	0	0	0	0	0
Sanguisorba officinalis																					0	0	0	0	0	0			0	0	0	0	0	0	0
Saxifraga oppositifol.-T.																					0	0	0	0	0	0			0	0	0	0	0	0	0
Scabiosa																					0	0	0	0	0	0			0	0	0	0	0	0	0
Scrophulariaceae																					0	0	0	0	0	0			0	0	0	0	0	0	0
Selaginella selaginoides																					0	0	0	0	0	0			0	0	0	0	0	0	0
Sphagnum																					0	0	0	0	0	0			0	0	0	0	0	0	0
Taxus	Taxus				1																1	1	0	0	0	0			0	0	0	0	0	0	0
Thalictrum																					0	0	0	0	0	0			0	0	0	0	0	0	0
Tilia	Tilia							1													1	1	1	0	0	0			0	0	0	0	0	0	0
Tilia platyphyllos																					0	0	0	0	0	0			0	0	0	0	0	0	0
Typha angustifolia-Typ																					0	0	0	0	0	0			0	0	0	0	0	0	0
Typha latifolia																					0	0	0	0	0	0			0	0	0	0	0	0	0
Ulmus	Ulmus							1													1	1	1	0	0	0			0	0	0	0	0	0	0
Umbelliferae																					0	0	0	0	0	0			0	0	0	0	0	0	0
Valeriana																					0	0	0	0	0	0			0	0	0	0	0	0	0
Varia																					0	0	0	0	0	0			0	0	0	0	0	0	0
Viscum																					0	0	0	0	0	0			0	0	0	0	0	0	0
																														0	0	0	0	0	0
In their original biomization scheme, Prentice et al. (1992) assigned Abies to boreal forest PFTs and biome. In the Alps Abies is not considered a boreal species, so for Alpine records we have amended the biomization scheme where Abies pollen percentages are not scored within the boreal forest biome.
Ephedra typically occurs in steppe environments in the Alps, not desert. However for all four records Ephedra contributed less than 1% to scores, and so did not heavily influence the biomization.
In the Prentice et al. (1992) scheme Larix is associated with a boreal summer-green species.
In the central Alps Larix occurs near the tree line but is not ecologically comparable to true boreal species (northern latitude species occurring where summer is short and temperatures are low).
Larix only occurs in very small percentages and therefore doesn't influence the biomization significantly.
In the Alps Betula also occurs as a temperate summer green, Buxus as a warm temperate broad-leaved evergreen, Populus as cool-temperate summer green, and Rhamnus frangula also occurs in a cool temperate summer green setting (like Fagus).

## Sheet: Furamoos
		Boreal evergreen conifer	Boreal summer green	Cool-temperate conifer	Intermediate temperate conifer	Eurythermic conifer	Temperate summer green	Cool-temperate summer green	Warm-temperate summer green	Warm-temperate broad-leaved evergreen	Cool-temperate broad-leaved evergreen	Warm-temperate sclerophyll shrub	Steppe forb	Desert forb	Arctic-alpine dwarf shrub	Grass	Sedge	Heath			Megabiomes									Megabiomes
		bec	bs	ctc	ctc1	ec	ts	ts1	ts2	wte	wte1	wte2	sf	df	aa	g	s	h			boreal forest	temperate forest	warm-temperate forest	grassland and dry shrubland	desert	tundra			sqrt	boreal forest	temperate forest	warm-temperate forest	grassland and dry shrubland	desert	tundra
Abies	Abies			1																	1	1	0	0	0	0			0	0	0	0	0	0	0
Acer	Acer						1														0	1	1	0	0	0			0	0	0	0	0	0	0
Alnus	Alnus		1				1								1						1	1	1	0	0	1			0	0	0	0	0	0	0
Apiaceae																					0	0	0	0	0	0			0	0	0	0	0	0	0
Artemisia	Artemisia												1								0	0	0	1	1	0			0	0	0	0	0	0	0
Astreaceae																					0	0	0	0	0	0			0	0	0	0	0	0	0
Betula	Betula		1				1								1						1	1	1	0	0	1			0	0	0	0	0	0	0
Botrycium																					0	0	0	0	0	0			0	0	0	0	0	0	0
Botryococcus																					0	0	0	0	0	0			0	0	0	0	0	0	0
Brassicaceae																					0	0	0	0	0	0			0	0	0	0	0	0	0
Buxus	Buxus									1	1										0	1	1	1	0	0			0	0	0	0	0	0	0
Carpinus	Carpinus							1													1	1	1	0	0	0			0	0	0	0	0	0	0
Caryophyllaceae																					0	0	0	0	0	0			0	0	0	0	0	0	0
Chenopodiaceae	Chenopodiaceae												1								0	0	0	1	1	0			0	0	0	0	0	0	0
Cichorioideae																					0	0	0	0	0	0			0	0	0	0	0	0	0
Corylus	Corylus							1													1	1	1	0	0	0			0	0	0	0	0	0	0
Cyperaceae	Cyperaceae																1				0	0	0	0	0	1			0	0	0	0	0	0	0
Ephedra dist.	Ephedra												1	1							0	0	0	1	1	0			0	0	0	0	0	0	0
Ericaceae	Ericales																	1			1	1	1	0	0	1			0	0	0	0	0	0	0
Fagus	Fagus							1													1	1	1	0	0	0			0	0	0	0	0	0	0
Filipendula																					0	0	0	0	0	0			0	0	0	0	0	0	0
Fraxinus																					0	0	0	0	0	0			0	0	0	0	0	0	0
Gramineae	Poaceae															1					0	0	0	1	1	1			0	0	0	0	0	0	0
Hedera	Hedera										1										0	1	1	0	0	0			0	0	0	0	0	0	0
Helianthemum																					0	0	0	0	0	0			0	0	0	0	0	0	0
Hippophae ram.																					0	0	0	0	0	0			0	0	0	0	0	0	0
Ilex	Ilex										1										0	1	1	0	0	0			0	0	0	0	0	0	0
Juniperus	Juniperus					1															1	1	1	1	0	0			0	0	0	0	0	0	0
Larix	Larix		1																		1	1	0	0	0	0			0	0	0	0	0	0	0
M.spicatum																					0	0	0	0	0	0			0	0	0	0	0	0	0
M.verticilatum																					0	0	0	0	0	0			0	0	0	0	0	0	0
Menyanthes trifoliata																					0	0	0	0	0	0			0	0	0	0	0	0	0
Myriophyllum alterni.																					0	0	0	0	0	0			0	0	0	0	0	0	0
Osmunda																					0	0	0	0	0	0			0	0	0	0	0	0	0
P. lanceolata																					0	0	0	0	0	0			0	0	0	0	0	0	0
P.cembra	Pinus (Haploxylon)	1																			1	1	0	0	0	0			0	0	0	0	0	0	0
Pediastrum																					0	0	0	0	0	0			0	0	0	0	0	0	0
Picea	Picea	1																			1	1	0	0	0	0			0	0	0	0	0	0	0
Pinus	Pinus (Diploxylon)					1															1	1	1	1	0	0			0	0	0	0	0	0	0
Plantago maritima Typ																					0	0	0	0	0	0			0	0	0	0	0	0	0
Populus	Populus		1				1														1	1	1	0	0	0			0	0	0	0	0	0	0
Potentilla T.																					0	0	0	0	0	0			0	0	0	0	0	0	0
Quercus	Quercus (deciduous)						1														0	1	1	0	0	0			0	0	0	0	0	0	0
Ranunculaceae																					0	0	0	0	0	0			0	0	0	0	0	0	0
Ranunculus aquatilis Typ																					0	0	0	0	0	0			0	0	0	0	0	0	0
Rosaceae																					0	0	0	0	0	0			0	0	0	0	0	0	0
Rubiaceae																					0	0	0	0	0	0			0	0	0	0	0	0	0
Rumex Typ																					0	0	0	0	0	0			0	0	0	0	0	0	0
Salix	Salix		1				1								1						1	1	1	0	0	1			0	0	0	0	0	0	0
Selaginella																					0	0	0	0	0	0			0	0	0	0	0	0	0
Sphagnum																					0	0	0	0	0	0			0	0	0	0	0	0	0
Taxus	Taxus				1																1	1	0	0	0	0			0	0	0	0	0	0	0
Thalictrum																					0	0	0	0	0	0			0	0	0	0	0	0	0
Tilia	Tilia							1													1	1	1	0	0	0			0	0	0	0	0	0	0
Ulmus	Ulmus							1													1	1	1	0	0	0			0	0	0	0	0	0	0
Urtica																					0	0	0	0	0	0			0	0	0	0	0	0	0
Varia NBP																					0	0	0	0	0	0			0	0	0	0	0	0	0
																														0	0	0	0	0	0
In their original biomization scheme, Prentice et al. (1992) assigned Abies to boreal forest PFTs and biome. In the Alps Abies is not considered a boreal species, so for Alpine records we have amended the biomization scheme where Abies pollen percentages are not scored within the boreal forest biome.
Ephedra typically occurs in steppe environments in the Alps, not desert. However for all four records Ephedra contributed less than 1% to scores, and so did not heavily influence the biomization.
In the Prentice et al. (1992) scheme Larix is associated with a boreal summer-green species.
In the central Alps Larix occurs near the tree line but is not ecologically comparable to true boreal species (northern latitude species occurring where summer is short and temperatures are low).
Larix only occurs in very small percentages and therefore doesn't influence the biomization significantly.
In the Alps Betula also occurs as a temperate summer green, Buxus as a warm temperate broad-leaved evergreen, Populus as cool-temperate summer green, and Rhamnus frangula also occurs in a cool temperate summer green setting (like Fagus).

## Sheet: Jammertal
		Boreal evergreen conifer	Boreal summer green	Cool-temperate conifer	Intermediate temperate conifer	Eurythermic conifer	Temperate summer green	Cool-temperate summer green	Warm-temperate summer green	Warm-temperate broad-leaved evergreen	Cool-temperate broad-leaved evergreen	Warm-temperate sclerophyll shrub	Steppe forb	Desert forb	Arctic-alpine dwarf shrub	Grass	Sedge	Heath			Megabiomes									Megabiomes
		bec	bs	ctc	ctc1	ec	ts	ts1	ts2	wte	wte1	wte2	sf	df	aa	g	s	h			boreal forest	temperate forest	warm-temperate forest	grassland and dry shrubland	desert	tundra			sqrt	boreal forest	temperate forest	warm-temperate forest	grassland and dry shrubland	desert	tundra
Abies	Abies			1																	1	1	0	0	0	0			0	0	0	0	0	0	0
Acer	Acer						1														0	1	1	0	0	0			0	0	0	0	0	0	0
Alnus	Alnus		1				1								1						1	1	1	0	0	1			0	0	0	0	0	0	0
Apiaceae																					0	0	0	0	0	0			0	0	0	0	0	0	0
Artemisia	Artemisia												1								0	0	0	1	1	0			0	0	0	0	0	0	0
Batrachium aqua.																					0	0	0	0	0	0			0	0	0	0	0	0	0
Betula	Betula		1				1								1						1	1	1	0	0	1			0	0	0	0	0	0	0
Brassicaceae																					0	0	0	0	0	0			0	0	0	0	0	0	0
Buxus	Buxus									1	1										0	1	1	1	0	0			0	0	0	0	0	0	0
Carpinus	Carpinus							1	1												1	1	1	0	0	0			0	0	0	0	0	0	0
Caryophyllaceae																					0	0	0	0	0	0			0	0	0	0	0	0	0
Chenopodiaceae	Chenopodiaceae												1								0	0	0	1	1	0			0	0	0	0	0	0	0
Cichoriadeae																					0	0	0	0	0	0			0	0	0	0	0	0	0
Corylus	Corylus							1													1	1	1	0	0	0			0	0	0	0	0	0	0
Cyperaceae	Cyperaceae																1				0	0	0	0	0	1			0	0	0	0	0	0	0
Ericaceae	Ericales																	1			1	1	1	0	0	1			0	0	0	0	0	0	0
Filipendula																					0	0	0	0	0	0			0	0	0	0	0	0	0
Fraxinus																					0	0	0	0	0	0			0	0	0	0	0	0	0
Gramineae	Poaceae															1					0	0	0	1	1	1			0	0	0	0	0	0	0
Hedera	Hedera										1										0	1	1	0	0	0			0	0	0	0	0	0	0
Helianthemum																					0	0	0	0	0	0			0	0	0	0	0	0	0
Ilex	Ilex										1										0	1	1	0	0	0			0	0	0	0	0	0	0
Juniperus	Juniperus					1															1	1	1	1	0	0			0	0	0	0	0	0	0
Larix	Larix		1																		1	1	0	0	0	0			0	0	0	0	0	0	0
Myriophyllum altern.																					0	0	0	0	0	0			0	0	0	0	0	0	0
Myriophyllum spic.																					0	0	0	0	0	0			0	0	0	0	0	0	0
Ostrya	Ostrya								1												0	1	1	0	0	0			0	0	0	0	0	0	0
Pediastrum																					0	0	0	0	0	0			0	0	0	0	0	0	0
Picea	Picea	1																			1	1	0	0	0	0			0	0	0	0	0	0	0
Pinus	Pinus (Diploxylon)					1															1	1	1	1	0	0			0	0	0	0	0	0	0
Quercus	Quercus (deciduous)						1														0	1	1	0	0	0			0	0	0	0	0	0	0
Ranunculaceae																					0	0	0	0	0	0			0	0	0	0	0	0	0
Rosaceae																					0	0	0	0	0	0			0	0	0	0	0	0	0
Rubiaceae																					0	0	0	0	0	0			0	0	0	0	0	0	0
Rumex Typ																					0	0	0	0	0	0			0	0	0	0	0	0	0
Salix	Salix		1				1								1						1	1	1	0	0	1			0	0	0	0	0	0	0
Sphagnum																					0	0	0	0	0	0			0	0	0	0	0	0	0
Taxus	Taxus				1																1	1	0	0	0	0			0	0	0	0	0	0	0
Thalictrum																					0	0	0	0	0	0			0	0	0	0	0	0	0
Tilia	Tilia							1													1	1	1	0	0	0			0	0	0	0	0	0	0
Ulmus	Ulmus							1													1	1	1	0	0	0			0	0	0	0	0	0	0
Varia NBP																					0	0	0	0	0	0			0	0	0	0	0	0	0
																														0	0	0	0	0	0
In their original biomization scheme, Prentice et al. (1992) assigned Abies to boreal forest PFTs and biome. In the Alps Abies is not considered a boreal species, so for Alpine records we have amended the biomization scheme where Abies pollen percentages are not scored within the boreal forest biome.
Ephedra typically occurs in steppe environments in the Alps, not desert. However for all four records Ephedra contributed less than 1% to scores, and so did not heavily influence the biomization.
In the Prentice et al. (1992) scheme Larix is associated with a boreal summer-green species.
In the central Alps Larix occurs near the tree line but is not ecologically comparable to true boreal species (northern latitude species occurring where summer is short and temperatures are low).
Larix only occurs in very small percentages and therefore doesn't influence the biomization significantly.
In the Alps Betula also occurs as a temperate summer green, Buxus as a warm temperate broad-leaved evergreen, Populus as cool-temperate summer green, and Rhamnus frangula also occurs in a cool temperate summer green setting (like Fagus).
