# Supplementary material for: Terrestrial biosphere changes over the last 120 kyr
Source: Copernicus journal article supplement (doi:10.5194/cp-12-51-2016), 2016-01-18
Supplement: Supplementary file 1 [file cp-12-51-2016-supplement.zip › supplement/Europe/BiomizationNorthernEuropeTarasovaetal.xls]

## Sheet: REGIONAL BIOMIZATION
		arctic cold-deciduous malacophyll broad-leaved prostrate dwarf shub	arctic dwarf shrub	arctic evergreen malacophyll broad-leaved prostrate dwarf shrub	arctic forb	arctic heath	arctic/alpine dwarf shrub	arctic/alpine fern or fern ally	arctic/alpine forb	arctic/alpine shrub	arctic/alpine shrub or herb	arctic/boreal dwarf shrub	arcto-boreal cold-deciduous malacophyll broad-leaved erect dwarf shrub	arcto-boreal cold-deciduous malacophyll broad-leaved low or high shrub	arcto-boreal evergreen malacophyll broad-leaved erect dwarf shrub	arcto-boreal evergreen malacophyll broad-leaved low or high shrub	arcto-boreal evergreen needle-leaved low or high shrub	arcto-boreal evergreen needle-leaved prostrate dwarf shrub	bog moss	boreal cold-deciduous malacophyll broad-leaved low or high shrub	boreal cold-deciduous malacophyll broad-leaved tree	boreal cold-deciduous needle-leaved tree		Boreal evergreen conifer		boreal evergreen malacophyll broad-leaved low or high shrub	boreal evergreen needle-leaved tree		boreal forb		boreal or temperate drought-tolerant cold-deciduous or evergreen malacophyll broad-leaved low or high shrub	boreal or temperate drought-tolerant forb	boreal summergreen	boreal summergreen conifer	boreal summergreen/arctic/alpine dwarf shrub		boreal/temperate summergreen shrub		cool desert shrub	Cool-boreal conifer shrub	cool-temperate broad-leaved evergreen	Cool-temperate conifer	cool-temperate evergreen	cool-temperate evergreen broad-leaved tree	cool-temperate evergreen needle-leaved tree	cool-temperate sclerophyll broad-leaved low or high shrub	cool-temperate summergreen	desert forb	desert forb/shrub
		1	2	3	4	5	6	7	8	9	10	11	12	13	14	15	16	17	18	19	20	21	22	23	24	25	26	27	28	29	30	31	32	33	34	35	36	37	38	39	40	41	42	43	44	45	46	47	48
A. glutinosa	Alnus glutinosa	0	0	0	0	0	0	0	0	0	0	0	0	0	0	0	0	0	0	0	1	0	0	0	0	0	0	0	0	0	0	0	0	0	0	0	0	0	0	0	0	0	0	0	0	0	0	0	0
Abies	Abies	0	0	0	0	0	0	0	0	0	0	0	0	0	0	0	0	0	0	0	0	0	0	1	0	0	1	0	0	0	0	0	0	0	0	0	0	0	0	0	0	1	0	0	0	0	0	0	0
Acer	Acer	0	0	0	0	0	0	0	0	0	0	0	0	0	0	0	0	0	0	0	0	0	0	0	0	0	0	0	0	0	0	0	0	0	0	0	0	0	0	0	0	0	0	0	0	0	0	0	0
Alisma pl.-aquatica	AQUATIC	0	0	0	0	0	0	0	0	0	0	0	0	0	0	0	0	0	0	0	0	0	0	0	0	0	0	0	0	0	0	0	0	0	0	0	0	0	0	0	0	0	0	0	0	0	0	0	0
Alnaster fruticosus	Alnaster	0	0	0	0	0	0	0	0	0	0	0	0	1	0	0	0	0	0	1	0	0	0	0	0	0	0	0	0	0	0	0	0	0	0	0	0	0	0	0	0	0	0	0	0	0	0	0	0
Alnus incana	Alnus incana	0	0	0	0	0	0	0	0	0	0	0	0	0	0	0	0	0	0	1	1	0	0	0	0	0	0	0	0	0	0	0	0	0	0	0	0	0	0	0	0	0	0	0	0	0	0	0	0
Apiaceae	Apiaceae	0	0	0	1	0	0	0	0	0	0	0	0	0	0	0	0	0	0	0	0	0	0	0	0	0	0	0	0	0	0	1	0	0	0	0	0	0	0	0	0	0	0	0	0	0	0	0	0
Artemisia	Artemisia	0	0	0	1	0	0	0	0	0	0	0	0	0	0	0	0	0	0	0	0	0	0	0	0	0	0	0	0	0	0	1	0	0	0	0	0	0	0	0	0	0	0	0	0	0	0	1	0
Asteraceae	Asteraceae	0	0	0	1	0	0	0	0	0	0	0	0	0	0	0	0	0	0	0	0	0	0	0	0	0	0	0	0	0	0	1	0	0	0	0	0	0	0	0	0	0	0	0	0	0	0	0	0
B. humilis	Betula humilus	0	0	0	0	0	0	0	0	0	0	0	0	1	0	0	0	0	0	0	0	0	0	0	0	0	0	0	0	0	0	0	0	0	0	0	0	0	0	0	0	0	0	0	0	0	0	0	0
B. nana	Betula nana-type	0	0	0	0	0	1	0	0	0	0	0	1	1	0	0	0	0	0	0	0	0	0	0	0	0	0	0	0	0	0	0	0	0	0	0	0	0	0	0	0	0	0	0	0	0	0	0	0
Betula alba	Betula albae	0	0	0	0	0	0	0	0	0	0	0	0	0	0	0	0	0	0	0	1	0	0	0	0	0	0	0	0	0	0	0	0	0	0	0	0	0	0	0	0	0	0	0	0	0	0	0	0
Betula sp.	Betula undiff.	0	0	0	0	0	1	0	0	0	0	0	1	1	0	0	0	0	0	1	1	0	0	0	0	0	0	0	0	0	0	0	1	0	0	0	0	0	0	0	0	0	0	0	0	0	0	0	0
Boraginaceae	Boraginaceae	0	0	0	0	0	0	0	0	0	0	0	0	0	0	0	0	0	0	0	0	0	0	0	0	0	0	0	0	0	0	1	0	0	0	0	0	0	0	0	0	0	0	0	0	0	0	1	0
Botrychium	Botrychium	0	0	0	0	0	0	0	0	0	0	0	0	0	0	0	0	0	0	0	0	0	0	0	0	0	0	0	0	0	0	0	0	0	0	0	0	0	0	0	0	0	0	0	0	0	0	0	0
Brassicaceae	Brassicaceae	0	0	0	1	0	0	0	0	0	0	0	0	0	0	0	0	0	0	0	0	0	0	0	0	0	0	0	0	0	0	1	0	0	0	0	0	0	0	0	0	0	0	0	0	0	0	0	0
Bryales	Moss	0	0	0	0	0	0	0	0	0	0	0	0	0	0	0	0	0	0	0	0	0	0	0	0	0	0	0	0	0	0	0	0	0	0	0	0	0	0	0	0	0	0	0	0	0	0	0	0
Campanulaceae	Campanulaceae	0	0	0	1	0	0	0	0	0	0	0	0	0	0	0	0	0	0	0	0	0	0	0	0	0	0	0	0	0	0	1	0	0	0	0	0	0	0	0	0	0	0	0	0	0	0	0	0
Cannabis	Cannabis	0	0	0	0	0	0	0	0	0	0	0	0	0	0	0	0	0	0	0	0	0	0	0	0	0	0	0	0	0	0	0	0	0	0	0	0	0	0	0	0	0	0	0	0	0	0	0	0
Carpinus	Carpinus	0	0	0	0	0	0	0	0	0	0	0	0	0	0	0	0	0	0	0	0	0	0	0	0	0	0	0	0	0	0	0	0	0	0	0	0	0	0	0	0	0	0	0	0	0	1	0	0
Caryophyllaceae	Caryophyllaceae undiff.	0	0	0	1	0	0	0	0	0	0	0	0	0	0	0	0	0	0	0	0	0	0	0	0	0	0	0	0	0	0	1	0	0	0	0	0	0	0	0	0	0	0	0	0	0	0	0	0
Centaurea cyanus	Centaurea cyanus	0	0	0	0	0	0	0	0	0	0	0	0	0	0	0	0	0	0	0	0	0	0	0	0	0	0	0	0	0	0	1	0	0	0	0	0	0	0	0	0	0	0	0	0	0	0	0	0
Cerealia		0	0	0	0	0	0	0	0	0	0	0	0	0	0	0	0	0	0	0	0	0	0	0	0	0	0	0	0	0	0	0	0	0	0	0	0	0	0	0	0	0	0	0	0	0	0	0	0
Chenopodiaceae	Chenopodiaceae/Amaranthaceae	0	0	0	0	0	0	0	0	0	0	0	0	0	0	0	0	0	0	0	0	0	0	0	0	0	0	0	0	0	0	1	0	0	0	0	0	0	0	0	0	0	0	0	0	0	0	0	0
Chrysosplenium	Saxifragaceae	0	0	0	1	0	1	0	0	0	0	0	0	0	0	0	0	0	0	0	0	0	0	0	0	0	0	0	0	0	0	0	0	0	0	0	0	0	0	0	0	0	0	0	0	0	0	0	0
Cichoriaceae	Asteraceae	0	0	0	1	0	0	0	0	0	0	0	0	0	0	0	0	0	0	0	0	0	0	0	0	0	0	0	0	0	0	1	0	0	0	0	0	0	0	0	0	0	0	0	0	0	0	0	0
Cornus mas	Cornus mas/C. svecia	0	0	0	0	0	0	0	0	0	0	0	0	0	0	0	0	0	0	1	0	0	0	0	0	0	0	0	0	0	0	0	0	0	0	0	0	0	0	0	0	0	0	0	0	0	0	0	0
Corylus	Corylus	0	0	0	0	0	0	0	0	0	0	0	0	0	0	0	0	0	0	0	1	0	0	0	0	0	0	0	0	0	0	0	0	0	0	0	0	0	0	0	0	0	0	0	0	0	1	0	0
Cyperaceae	Cyperaceae	0	0	0	0	0	0	0	0	0	0	0	0	0	0	0	0	0	0	0	0	0	0	0	0	0	0	0	0	0	0	0	0	0	0	0	0	0	0	0	0	0	0	0	0	0	0	0	0
Dipsacaceae	Dipsacaceae	0	0	0	0	0	0	0	0	0	0	0	0	0	0	0	0	0	0	0	0	0	0	0	0	0	0	0	0	0	0	1	0	0	0	0	0	0	0	0	0	0	0	0	0	0	0	0	0
Drosera	Droseraceae	0	0	0	0	0	0	0	0	0	0	0	0	0	0	0	0	0	0	0	0	0	0	0	0	0	0	0	0	0	0	0	0	0	0	0	0	0	0	0	0	0	0	0	0	0	0	0	0
Ephedra	Ephedra	0	0	0	0	0	0	0	0	0	0	0	0	0	0	0	0	0	0	0	0	0	0	0	0	0	0	0	0	0	0	0	0	0	0	0	0	0	0	0	0	0	0	0	0	0	0	1	0
Equisetum	Equisetaceae	0	0	0	0	0	0	0	0	0	0	0	0	0	0	0	0	0	0	0	0	0	0	0	0	0	0	0	0	0	0	0	0	0	0	0	0	0	0	0	0	0	0	0	0	0	0	0	0
Ericales	Ericales	0	0	0	0	0	0	0	0	0	0	0	1	1	1	1	0	0	0	0	0	0	0	0	0	0	0	0	0	0	0	0	0	0	0	0	0	0	0	0	0	0	0	0	0	0	0	0	0
Euonimus	Euonimus	0	0	0	0	0	0	0	0	0	0	0	0	0	0	0	0	0	0	0	0	0	0	0	0	0	0	0	0	0	0	0	0	0	0	0	0	0	0	0	0	0	0	0	0	0	0	0	0
Fabaceae	Fabaceae	0	0	0	1	0	0	0	0	0	0	0	0	0	0	0	0	0	0	0	0	0	0	0	0	0	0	0	0	0	0	0	0	0	0	0	0	0	0	0	0	0	0	0	0	0	0	0	0
Fagopyrum	Polygonaceae	0	0	0	1	0	1	0	0	0	0	0	0	0	0	0	0	0	0	0	0	0	0	0	0	0	0	0	0	0	0	1	0	0	0	0	0	0	0	0	0	0	0	0	0	0	0	1	0
Fraxinus	Fraxinus	0	0	0	0	0	0	0	0	0	0	0	0	0	0	0	0	0	0	0	0	0	0	0	0	0	0	0	0	0	0	0	0	0	0	0	0	0	0	0	0	0	0	0	0	0	0	0	0
Gentianaceae	Gentianaceae	0	0	0	1	0	0	0	0	0	0	0	0	0	0	0	0	0	0	0	0	0	0	0	0	0	0	0	0	0	0	1	0	0	0	0	0	0	0	0	0	0	0	0	0	0	0	0	0
Helianthemum	Cistaceae	0	0	0	0	0	0	0	0	0	0	0	0	0	0	0	0	0	0	0	0	0	0	0	0	0	0	0	0	0	0	0	0	0	0	0	0	0	0	0	0	0	0	0	0	0	0	0	0
Hepatica	Ranunculaceae	0	0	0	0	0	0	0	0	0	0	0	0	0	0	0	0	0	0	0	0	0	0	0	0	0	0	0	0	0	0	1	0	0	0	0	0	0	0	0	0	0	0	0	0	0	0	0	0
Hippophae	Hippophae	0	0	0	0	0	0	0	0	0	0	0	0	0	0	0	0	0	0	0	0	0	0	0	0	0	0	0	0	0	0	0	0	0	0	0	0	0	0	0	0	0	0	0	0	0	0	0	0
Humulus lupulus	Cannabis	0	0	0	0	0	0	0	0	0	0	0	0	0	0	0	0	0	0	0	0	0	0	0	0	0	0	0	0	0	0	0	0	0	0	0	0	0	0	0	0	0	0	0	0	0	0	0	0
Juniperus	Juniperus	0	0	0	0	0	0	0	0	0	0	0	0	0	0	0	0	0	0	0	0	0	0	0	0	0	0	0	0	0	0	0	0	0	0	0	0	0	0	0	0	0	0	0	0	0	0	0	0
L. clavatum		0	0	0	0	0	0	0	0	0	0	0	0	0	0	0	0	0	0	0	0	0	0	0	0	0	0	0	0	0	0	0	0	0	0	0	0	0	0	0	0	0	0	0	0	0	0	0	0
L. complanatum		0	0	0	0	0	0	0	0	0	0	0	0	0	0	0	0	0	0	0	0	0	0	0	0	0	0	0	0	0	0	0	0	0	0	0	0	0	0	0	0	0	0	0	0	0	0	0	0
L. pungens		0	0	0	0	0	0	0	0	0	0	0	0	0	0	0	0	0	0	0	0	0	0	0	0	0	0	0	0	0	0	0	0	0	0	0	0	0	0	0	0	0	0	0	0	0	0	0	0
L. selago		0	0	0	0	0	0	0	0	0	0	0	0	0	0	0	0	0	0	0	0	0	0	0	0	0	0	0	0	0	0	0	0	0	0	0	0	0	0	0	0	0	0	0	0	0	0	0	0
L. tristahyum		0	0	0	0	0	0	0	0	0	0	0	0	0	0	0	0	0	0	0	0	0	0	0	0	0	0	0	0	0	0	0	0	0	0	0	0	0	0	0	0	0	0	0	0	0	0	0	0
Labiatae	Labiatae undiff.	0	0	0	0	0	0	0	0	0	0	0	0	0	0	0	0	0	0	0	0	0	0	0	0	0	0	0	0	0	0	1	0	0	0	0	0	0	0	0	0	0	0	0	0	0	0	0	0
Larix	Larix	0	0	0	0	0	0	0	0	0	0	0	0	0	0	0	0	0	0	0	0	1	0	0	0	0	0	0	0	0	0	0	1	0	0	0	0	0	0	0	0	0	0	0	0	0	0	0	0
Lemna	AQUATIC	0	0	0	0	0	0	0	0	0	0	0	0	0	0	0	0	0	0	0	0	0	0	0	0	0	0	0	0	0	0	0	0	0	0	0	0	0	0	0	0	0	0	0	0	0	0	0	0
Liliaceae	Liliaceae	0	0	0	1	0	0	0	0	0	0	0	0	0	0	0	0	0	0	0	0	0	0	0	0	0	0	0	0	0	0	1	0	0	0	0	0	0	0	0	0	0	0	0	0	0	0	0	0
Linum	Liliaceae	0	0	0	1	0	0	0	0	0	0	0	0	0	0	0	0	0	0	0	0	0	0	0	0	0	0	0	0	0	0	1	0	0	0	0	0	0	0	0	0	0	0	0	0	0	0	0	0
Lycopodium annotinum		0	0	0	0	0	0	0	0	0	0	0	0	0	0	0	0	0	0	0	0	0	0	0	0	0	0	0	0	0	0	0	0	0	0	0	0	0	0	0	0	0	0	0	0	0	0	0	0
Lysimachia	Primulaceae	0	0	0	1	0	0	0	0	0	0	0	0	0	0	0	0	0	0	0	0	0	0	0	0	0	0	0	0	0	0	1	0	0	0	0	0	0	0	0	0	0	0	0	0	0	0	0	0
Malaceae	Rosaceae	0	0	0	0	0	0	0	0	0	0	0	0	0	0	0	0	0	0	0	0	0	0	0	0	0	0	0	0	0	0	0	0	0	0	0	0	0	0	0	0	0	0	0	0	0	0	0	0
Menyanthes	Menyanthaceae	0	0	0	0	0	0	0	0	0	0	0	0	0	0	0	0	0	0	0	0	0	0	0	0	0	0	0	0	0	0	0	0	0	0	0	0	0	0	0	0	0	0	0	0	0	0	0	0
Mercurialis	Euphorbiaceae	0	0	0	0	0	0	0	0	0	0	0	0	0	0	0	0	0	0	0	0	0	0	0	0	0	0	0	0	0	0	0	0	0	0	0	0	0	0	0	0	0	0	0	0	0	0	0	0
Myrica	Myrica	0	0	0	0	0	0	0	0	0	0	0	0	0	0	0	0	0	0	1	0	0	0	0	0	0	0	0	0	0	0	0	0	0	0	0	0	0	0	0	0	0	0	0	0	0	0	0	0
Myriophyllum	AQUATIC	0	0	0	0	0	0	0	0	0	0	0	0	0	0	0	0	0	0	0	0	0	0	0	0	0	0	0	0	0	0	0	0	0	0	0	0	0	0	0	0	0	0	0	0	0	0	0	0
Nuphar	AQUATIC	0	0	0	0	0	0	0	0	0	0	0	0	0	0	0	0	0	0	0	0	0	0	0	0	0	0	0	0	0	0	0	0	0	0	0	0	0	0	0	0	0	0	0	0	0	0	0	0
Nymphaea	AQUATIC	0	0	0	0	0	0	0	0	0	0	0	0	0	0	0	0	0	0	0	0	0	0	0	0	0	0	0	0	0	0	0	0	0	0	0	0	0	0	0	0	0	0	0	0	0	0	0	0
Onagraceae	Onagraceae	0	0	0	1	0	0	0	0	0	0	0	0	0	0	0	0	0	0	0	0	0	0	0	0	0	0	0	0	0	0	1	0	0	0	0	0	0	0	0	0	0	0	0	0	0	0	0	0
Ophyoglossum vulgatum		0	0	0	0	0	0	0	0	0	0	0	0	0	0	0	0	0	0	0	0	0	0	0	0	0	0	0	0	0	0	0	0	0	0	0	0	0	0	0	0	0	0	0	0	0	0	0	0
Osmunda cinnamomea	Osmundaceae (fern)	0	0	0	0	0	0	0	0	0	0	0	0	0	0	0	0	0	0	0	0	0	0	0	0	0	0	0	0	0	0	0	0	0	0	0	0	0	0	0	0	0	0	0	0	0	0	0	0
P. lanceolata	Plantago	0	0	0	0	0	0	0	0	0	0	0	0	0	0	0	0	0	0	0	0	0	0	0	0	0	0	0	0	0	0	0	0	0	0	0	0	0	0	0	0	0	0	0	0	0	0	0	0
P. sylvestris	Pinus sylvestris	0	0	0	0	0	0	0	0	0	0	0	0	0	0	0	0	0	0	0	0	0	0	0	0	0	0	0	0	0	0	0	0	0	0	0	0	0	0	0	0	0	0	0	0	0	0	0	0
Pedicularis	Pedicularis	0	0	0	1	0	1	0	0	0	0	0	0	0	0	0	0	0	0	0	0	0	0	0	0	0	0	0	0	0	0	0	0	0	0	0	0	0	0	0	0	0	0	0	0	0	0	0	0
Picea	Picea	0	0	0	0	0	0	0	0	0	0	0	0	0	0	0	0	0	0	0	0	0	0	1	0	0	1	0	0	0	0	0	0	0	0	0	0	0	0	0	0	0	0	0	0	0	0	0	0
Pinus sibirica	Pinus sibirica	0	0	0	0	0	0	0	0	0	0	0	0	0	0	0	0	0	0	0	0	0	0	0	0	0	0	0	0	0	0	0	0	0	0	0	0	0	0	0	0	0	0	0	0	0	0	0	0
Plantago sp.	Plantago undiff.	0	0	0	1	0	0	0	0	0	0	0	0	0	0	0	0	0	0	0	0	0	0	0	0	0	0	0	0	0	0	1	0	0	0	0	0	0	0	0	0	0	0	0	0	0	0	0	0
Plumbaginaceae	Plumbaginaceae	0	0	0	0	0	0	0	0	0	0	0	0	0	0	0	0	0	0	0	0	0	0	0	0	0	0	0	0	0	0	1	0	0	0	0	0	0	0	0	0	0	0	0	0	0	0	0	0
Poaceae	Poaceae	0	0	0	0	0	0	0	0	0	0	0	0	0	0	0	0	0	0	0	0	0	0	0	0	0	0	0	0	0	0	0	0	0	0	0	0	0	0	0	0	0	0	0	0	0	0	0	0
Polemonium	Polemonium	0	0	0	1	0	0	0	0	0	0	0	0	0	0	0	0	0	0	0	0	0	0	0	0	0	0	0	0	0	0	0	0	0	0	0	0	0	0	0	0	0	0	0	0	0	0	0	0
Polygonaceae	Polygonaceae	0	0	0	1	0	1	0	0	0	0	0	0	0	0	0	0	0	0	0	0	0	0	0	0	0	0	0	0	0	0	1	0	0	0	0	0	0	0	0	0	0	0	0	0	0	0	1	0
Polypodiaceae	Polypodiaceae	0	0	0	0	0	0	0	0	0	0	0	0	0	0	0	0	0	0	0	0	0	0	0	0	0	0	0	0	0	0	0	0	0	0	0	0	0	0	0	0	0	0	0	0	0	0	0	0
Potamogeton	AQUATIC	0	0	0	0	0	0	0	0	0	0	0	0	0	0	0	0	0	0	0	0	0	0	0	0	0	0	0	0	0	0	0	0	0	0	0	0	0	0	0	0	0	0	0	0	0	0	0	0
Primulaceae	Primulaceae	0	0	0	1	0	0	0	0	0	0	0	0	0	0	0	0	0	0	0	0	0	0	0	0	0	0	0	0	0	0	1	0	0	0	0	0	0	0	0	0	0	0	0	0	0	0	0	0
Pteridium aquilinum	Dennstaedtiaceae (fern)	0	0	0	0	0	0	0	0	0	0	0	0	0	0	0	0	0	0	0	0	0	0	0	0	0	0	0	0	0	0	0	0	0	0	0	0	0	0	0	0	0	0	0	0	0	0	0	0
Quercus	Quercus	0	0	0	0	0	0	0	0	0	0	0	0	0	0	0	0	0	0	0	0	0	0	0	0	0	0	0	0	0	0	0	0	0	0	0	0	0	0	0	0	0	0	0	0	0	0	0	0
R. acetosella	Rumex Subgen. Acetosa/R. Subgen. Acetosella	0	0	0	1	0	0	0	0	0	0	0	0	0	0	0	0	0	0	0	0	0	0	0	0	0	0	0	0	0	0	0	0	0	0	0	0	0	0	0	0	0	0	0	0	0	0	0	0
Ranunculaceae	Ranunculaceae	0	0	0	0	0	0	0	0	0	0	0	0	0	0	0	0	0	0	0	0	0	0	0	0	0	0	0	0	0	0	1	0	0	0	0	0	0	0	0	0	0	0	0	0	0	0	0	0
Rhamnus frangula	Rhamnus	0	0	0	0	0	0	0	0	0	0	0	0	0	0	0	0	0	0	0	0	0	0	0	0	0	0	0	0	0	0	0	0	0	0	0	0	0	0	0	0	0	0	0	0	0	0	0	0
Ribes	Ribes	0	0	0	0	0	0	0	0	0	0	0	0	0	0	0	0	0	0	1	0	0	0	0	0	0	0	0	0	0	0	0	0	0	0	0	0	0	0	0	0	0	0	0	0	0	0	0	0
Rosaceae	Rosaceae	0	0	0	0	0	0	0	0	0	0	0	0	0	0	0	0	0	0	0	0	0	0	0	0	0	0	0	0	0	0	0	0	0	0	0	0	0	0	0	0	0	0	0	0	0	0	0	0
Rubiaceae	Rubiaceae	0	0	0	0	0	0	0	0	0	0	0	0	0	0	0	0	0	0	0	0	0	0	0	0	0	0	0	0	0	0	0	0	0	0	0	0	0	0	0	0	0	0	0	0	0	0	0	0
Rubus chamaemorus	Rubus chamaemorus	0	0	0	0	0	0	0	0	0	0	1	0	0	0	1	0	0	0	0	0	0	0	0	0	0	0	0	0	0	0	0	0	0	0	0	0	0	0	0	0	0	0	0	0	0	0	0	0
Rumex sp.	Rumex	0	0	0	1	0	0	0	0	0	0	0	0	0	0	0	0	0	0	0	0	0	0	0	0	0	0	0	0	0	0	1	0	0	0	0	0	0	0	0	0	0	0	0	0	0	0	0	0
Sagittaria	Alismataceae	0	0	0	0	0	0	0	0	0	0	0	0	0	0	0	0	0	0	0	0	0	0	0	0	0	0	0	0	0	0	0	0	0	0	0	0	0	0	0	0	0	0	0	0	0	0	0	0
Salix	Salix	1	0	0	0	0	1	0	0	0	0	0	1	1	0	0	0	0	0	1	1	0	0	0	0	0	0	0	0	0	0	0	1	0	0	0	0	0	0	0	0	0	0	0	0	0	0	0	0
Sanguisorba	Sanguisorba	0	0	0	1	0	0	0	0	0	0	0	0	0	0	0	0	0	0	0	0	0	0	0	0	0	0	0	0	0	0	1	0	0	0	0	0	0	0	0	0	0	0	0	0	0	0	0	0
Saxifraga	Saxifraga	0	0	0	1	0	0	0	0	0	0	0	0	0	0	0	0	0	0	0	0	0	0	0	0	0	0	0	0	0	0	0	0	0	0	0	0	0	0	0	0	0	0	0	0	0	0	0	0
Scrophulariaceae	Scrophulariaceae	0	0	0	1	0	1	0	0	0	0	0	0	0	0	0	0	0	0	0	0	0	0	0	0	0	0	0	0	0	0	1	0	0	0	0	0	0	0	0	0	0	0	0	0	0	0	0	0
Sedum	Sedum	0	0	0	1	0	0	0	0	0	0	0	0	0	0	0	0	0	0	0	0	0	0	0	0	0	0	0	0	0	0	1	0	0	0	0	0	0	0	0	0	0	0	0	0	0	0	0	0
Selaginella selaginoides	Selaginellaceae (fern)	0	0	0	0	0	0	0	0	0	0	0	0	0	0	0	0	0	0	0	0	0	0	0	0	0	0	0	0	0	0	0	0	0	0	0	0	0	0	0	0	0	0	0	0	0	0	0	0
Sparganium	Sparganiaceae	0	0	0	0	0	0	0	0	0	0	0	0	0	0	0	0	0	0	0	0	0	0	0	0	0	0	0	0	0	0	0	0	0	0	0	0	0	0	0	0	0	0	0	0	0	0	0	0
Spergula	Cayophyllaceae	0	0	0	0	0	0	0	0	0	0	0	0	0	0	0	0	0	0	0	0	0	0	0	0	0	0	0	0	0	0	1	0	0	0	0	0	0	0	0	0	0	0	0	0	0	0	0	0
Sphagnum	Sphagnum	0	0	0	0	0	0	0	0	0	0	0	0	0	0	0	0	0	1	0	0	0	0	0	0	0	0	0	0	0	0	0	0	0	0	0	0	0	0	0	0	0	0	0	0	0	0	0	0
Stratiotes	AQUATIC	0	0	0	0	0	0	0	0	0	0	0	0	0	0	0	0	0	0	0	0	0	0	0	0	0	0	0	0	0	0	0	0	0	0	0	0	0	0	0	0	0	0	0	0	0	0	0	0
Thalictrum	Thalictrum	0	0	0	1	0	0	0	1	0	0	0	0	0	0	0	0	0	0	0	0	0	0	0	0	0	0	0	0	0	0	1	0	0	0	0	0	0	0	0	0	0	0	0	0	0	0	0	0
Tilia	Tilia	0	0	0	0	0	0	0	0	0	0	0	0	0	0	0	0	0	0	0	0	0	0	0	0	0	0	0	0	0	0	0	0	0	0	0	0	0	0	0	0	0	0	0	0	0	1	0	0
Typha latifolia		0	0	0	0	0	0	0	0	0	0	0	0	0	0	0	0	0	0	0	0	0	0	0	0	0	0	0	0	0	0	0	0	0	0	0	0	0	0	0	0	0	0	0	0	0	0	0	0
Ulmus	Ulmus	0	0	0	0	0	0	0	0	0	0	0	0	0	0	0	0	0	0	0	0	0	0	0	0	0	0	0	0	0	0	0	0	0	0	0	0	0	0	0	0	0	0	0	0	0	1	0	0
Urtica	Urticaceae	0	0	0	0	0	0	0	0	0	0	0	0	0	0	0	0	0	0	0	0	0	0	0	0	0	0	0	0	0	0	0	0	0	0	0	0	0	0	0	0	0	0	0	0	0	0	0	0
Utricularia	Lentibulariaceae	0	0	0	0	0	0	0	0	0	0	0	0	0	0	0	0	0	0	0	0	0	0	0	0	0	0	0	0	0	0	0	0	0	0	0	0	0	0	0	0	0	0	0	0	0	0	0	0
Valeriana	Valeriana	0	0	0	1	0	0	0	0	0	0	0	0	0	0	0	0	0	0	0	0	0	0	0	0	0	0	0	0	0	0	1	0	0	0	0	0	0	0	0	0	0	0	0	0	0	0	0	0
Viburnum opulus	Viburnum	0	0	0	0	0	0	0	0	0	0	0	0	0	0	0	0	0	0	1	0	0	0	0	0	0	0	0	0	0	0	0	0	0	0	0	1	0	0	0	0	0	0	0	0	0	0	0	0
Violaceae	Violaceae	0	0	0	1	0	0	0	0	0	0	0	0	0	0	0	0	0	0	0	0	0	0	0	0	0	0	0	0	0	0	0	0	0	0	0	0	0	0	0	0	0	0	0	0	0	0	0	0
Viscum album	Viscaceae	0	0	0	0	0	0	0	0	0	0	0	0	0	0	0	0	0	0	0	0	0	0	0	0	0	0	0	0	0	0	0	0	0	0	0	0	0	0	0	0	0	0	0	0	0	0	0	0
[truncated: 151 more columns]

## Sheet: But
		arctic /alpine dwarf shrub	arctic /boreal dwarf shrub	boreal evergreen conifer	boreal summergreen	boreal-temperate summergreen shrub	cool-boreal conifer shrub	cool-temperate conifer	desert forb	eurythermic conifer	grass	heath	sedge	steppe forb	temperate summergreen	cool-temperate summergreen	warm-temperate summergreen	southern warm-temperate summergreen	warm-temperate broadleaved evergreen	warm-temperate sclerophyll shrub				MEGABIOMES								MEGABIOMES
Taxa		aa	ab	bec	bs	bts	cbc	ctc	df	ec	g	h	s	sf	ts	ts1	ts2	ts3	wte	wte2				tundra	boreal forest	temperate forest	warm temperate forest	desert	grassland and dry shurbland		sqrt	tundra	boreal forest	temperate forest	warm temperate forest	desert	grassland and dry shurbland
A. glutinosa	Alnus (incl. A. glutinosa and A. incana)				1										1									0	1	1	1	0	0		0	0	0	0	0	0	0
Abies	Abies			1				1																0	1	1	0	0	0		0	0	0	0	0	0	0
Acer	Acer														1									0	0	1	1	0	0		0	0	0	0	0	0	0
Alisma pl.-aquatica	AQUATIC																							0	0	0	0	0	0		0	0	0	0	0	0	0
Alnaster fruticosus	Alnaster																							0	0	0	0	0	0		0	0	0	0	0	0	0
Alnus incana	Alnus (incl. A. glutinosa and A. incana)				1										1									0	1	1	1	0	0		0	0	0	0	0	0	0
Apiaceae	Apiaceae													1										0	0	0	0	0	1		0	0	0	0	0	0	0
Artemisia	Artemisia								1					1										0	0	0	0	1	1		0	0	0	0	0	0	0
Asteraceae	Asteraceae undiff.													1										0	0	0	0	0	1		0	0	0	0	0	0	0
B. humilis	Betula undiff	1			1																			1	1	1	0	0	0		0	0	0	0	0	0	0
B. nana	Betula nana-type	1																						1	0	0	0	0	0		0	0	0	0	0	0	0
Betula alba	Betula (Albae)				1																			0	1	1	0	0	0		0	0	0	0	0	0	0
Betula sp.	Betula undiff	1			1																			1	1	1	0	0	0		0	0	0	0	0	0	0
Boraginaceae	Boraginaceae								1					1										0	0	0	0	1	1		0	0	0	0	0	0	0
Botrychium	Botrychium																							0	0	0	0	0	0		0	0	0	0	0	0	0
Brassicaceae	Brassicaceae													1										0	0	0	0	0	1		0	0	0	0	0	0	0
Bryales	Moss																							0	0	0	0	0	0		0	0	0	0	0	0	0
Campanulaceae	Campanulaceae																							0	0	0	0	0	0		0	0	0	0	0	0	0
Cannabis	Cannabis													1										0	0	0	0	0	1		0	0	0	0	0	0	0
Carpinus	Carpinus															1								0	1	1	1	0	0		0	0	0	0	0	0	0
Caryophyllaceae	Caryophyllaceae													1										0	0	0	0	0	1		0	0	0	0	0	0	0
Centaurea cyanus	Centaurea cyanus																							0	0	0	0	0	0		0	0	0	0	0	0	0
Cerealia																								0	0	0	0	0	0		0	0	0	0	0	0	0
Chenopodiaceae	Chenopodiaceae								1					1										0	0	0	0	1	1		0	0	0	0	0	0	0
Chrysosplenium	Saxifragaceae	1																						1	0	0	0	0	0		0	0	0	0	0	0	0
Cichoriaceae	Asteraceae (Cichorioideae)													1										0	0	0	0	0	1		0	0	0	0	0	0	0
Cornus mas	Cornus mas/C. svecia																							0	0	0	0	0	0		0	0	0	0	0	0	0
Corylus	Corylus															1								0	1	1	1	0	0		0	0	0	0	0	0	0
Cyperaceae	Cyperaceae												1											1	0	0	0	0	0		0	0	0	0	0	0	0
Dipsacaceae	Dipsacaceae																							0	0	0	0	0	0		0	0	0	0	0	0	0
Drosera	Droseraceae																							0	0	0	0	0	0		0	0	0	0	0	0	0
Ephedra	Ephedra								1															0	0	0	0	1	0		0	0	0	0	0	0	0
Equisetum	Equisetaceae																							0	0	0	0	0	0		0	0	0	0	0	0	0
Ericales	Ericales											1												1	1	1	1	0	0		0	0	0	0	0	0	0
Euonimus	Euonimus																							0	0	0	0	0	0		0	0	0	0	0	0	0
Fabaceae	Fabaceae													1										0	0	0	0	0	1		0	0	0	0	0	0	0
Fagopyrum	Polygonaceae	1							1					1										1	0	0	0	1	1		0	0	0	0	0	0	0
Fraxinus	Fraxinus																							0	0	0	0	0	0		0	0	0	0	0	0	0
Gentianaceae	Gentianaceae																							0	0	0	0	0	0		0	0	0	0	0	0	0
Helianthemum	Cistaceae																							0	0	0	0	0	0		0	0	0	0	0	0	0
Hepatica	Ranunculaceae													1										0	0	0	0	0	1		0	0	0	0	0	0	0
Hippophae	Hippophae													1										0	0	0	0	0	1		0	0	0	0	0	0	0
Humulus lupulus	Cannabis													1										0	0	0	0	0	1		0	0	0	0	0	0	0
Juniperus	Juniperus									1														0	1	1	1	0	0		0	0	0	0	0	0	0
L. clavatum																								0	0	0	0	0	0		0	0	0	0	0	0	0
L. complanatum																								0	0	0	0	0	0		0	0	0	0	0	0	0
L. pungens																								0	0	0	0	0	0		0	0	0	0	0	0	0
L. selago																								0	0	0	0	0	0		0	0	0	0	0	0	0
L. tristahyum																								0	0	0	0	0	0		0	0	0	0	0	0	0
Labiatae	Labiatae undiff.																							0	0	0	0	0	0		0	0	0	0	0	0	0
Larix	Larix				1																			0	1	1	0	0	0		0	0	0	0	0	0	0
Lemna	AQUATIC																							0	0	0	0	0	0		0	0	0	0	0	0	0
Liliaceae	Liliaceae																							0	0	0	0	0	0		0	0	0	0	0	0	0
Linum	Liliaceae																							0	0	0	0	0	0		0	0	0	0	0	0	0
Lycopodium annotinum																								0	0	0	0	0	0		0	0	0	0	0	0	0
Lysimachia	Primulaceae																							0	0	0	0	0	0		0	0	0	0	0	0	0
Malaceae	Rosaceae													1										0	0	0	0	0	1		0	0	0	0	0	0	0
Menyanthes	Menyanthaceae																							0	0	0	0	0	0		0	0	0	0	0	0	0
Mercurialis	Euphorbiaceae																							0	0	0	0	0	0		0	0	0	0	0	0	0
Myrica	Myrica																							0	0	0	0	0	0		0	0	0	0	0	0	0
Myriophyllum	AQUATIC																							0	0	0	0	0	0		0	0	0	0	0	0	0
Nuphar	AQUATIC																							0	0	0	0	0	0		0	0	0	0	0	0	0
Nymphaea	AQUATIC																							0	0	0	0	0	0		0	0	0	0	0	0	0
Onagraceae	Onagraceae																							0	0	0	0	0	0		0	0	0	0	0	0	0
Ophyoglossum vulgatum																								0	0	0	0	0	0		0	0	0	0	0	0	0
Osmunda cinnamomea	Osmundaceae (fern)																							0	0	0	0	0	0		0	0	0	0	0	0	0
P. lanceolata	Plantago													1										0	0	0	0	0	1		0	0	0	0	0	0	0
P. sylvestris	Pinus (Diploxylon)									1														0	1	1	1	0	0		0	0	0	0	0	0	0
Pedicularis	Pedicularis																							0	0	0	0	0	0		0	0	0	0	0	0	0
Picea	Picea			1																				0	1	1	0	0	0		0	0	0	0	0	0	0
Pinus sibirica	Pinus (Haploxylon)			1			1																	0	1	1	0	0	0		0	0	0	0	0	0	0
Plantago sp.	Plantago													1										0	0	0	0	0	1		0	0	0	0	0	0	0
Plumbaginaceae	Plumbaginaceae													1										0	0	0	0	0	1		0	0	0	0	0	0	0
Poaceae	Poaceae										1													1	0	0	0	0	1		0	0	0	0	0	0	0
Polemonium	Polemonium																							0	0	0	0	0	0		0	0	0	0	0	0	0
Polygonaceae	Polygonaceae	1							1					1										1	0	0	0	1	1		0	0	0	0	0	0	0
Polypodiaceae	Polypodiaceae																							0	0	0	0	0	0		0	0	0	0	0	0	0
Potamogeton	AQUATIC																							0	0	0	0	0	0		0	0	0	0	0	0	0
Primulaceae	Primulaceae																							0	0	0	0	0	0		0	0	0	0	0	0	0
Pteridium aquilinum	Dennstaedtiaceae (fern)																							0	0	0	0	0	0		0	0	0	0	0	0	0
Quercus	Quercus undiff.														1				1					0	0	1	1	0	0		0	0	0	0	0	0	0
R. acetosella	Rumex Subgen. Acetosa/R. Subgen. Acetosella																							0	0	0	0	0	0		0	0	0	0	0	0	0
Ranunculaceae	Ranunculaceae													1										0	0	0	0	0	1		0	0	0	0	0	0	0
Rhamnus frangula	Rhamnus																							0	0	0	0	0	0		0	0	0	0	0	0	0
Ribes	Ribes																							0	0	0	0	0	0		0	0	0	0	0	0	0
Rosaceae	Rosaceae													1										0	0	0	0	0	1		0	0	0	0	0	0	0
Rubiaceae	Rubiaceae													1										0	0	0	0	0	1		0	0	0	0	0	0	0
Rubus chamaemorus	Rubus chamaemorus		1																					1	1	1	0	0	0		0	0	0	0	0	0	0
Rumex sp.	Rumex																							0	0	0	0	0	0		0	0	0	0	0	0	0
Sagittaria	Alismataceae																							0	0	0	0	0	0		0	0	0	0	0	0	0
Salix	Salix	1			1										1									1	1	1	1	0	0		0	0	0	0	0	0	0
Sanguisorba	Sanguisorba																							0	0	0	0	0	0		0	0	0	0	0	0	0
Saxifraga	Saxifragaceae	1																						1	0	0	0	0	0		0	0	0	0	0	0	0
Scrophulariaceae	Scrophulariaceae																							0	0	0	0	0	0		0	0	0	0	0	0	0
Sedum	Sedum																							0	0	0	0	0	0		0	0	0	0	0	0	0
Selaginella selaginoides	Selaginellaceae (fern)																							0	0	0	0	0	0		0	0	0	0	0	0	0
Sparganium	Sparganiaceae																							0	0	0	0	0	0		0	0	0	0	0	0	0
Spergula	Caryophyllaceae													1										0	0	0	0	0	1		0	0	0	0	0	0	0
Sphagnum	Sphagnum																							0	0	0	0	0	0		0	0	0	0	0	0	0
Stratiotes	AQUATIC																							0	0	0	0	0	0		0	0	0	0	0	0	0
Thalictrum	Thalictrum																							0	0	0	0	0	0		0	0	0	0	0	0	0
Tilia	Tilia															1								0	1	1	1	0	0		0	0	0	0	0	0	0
Typha latifolia																								0	0	0	0	0	0		0	0	0	0	0	0	0
Ulmus	Ulmus															1								0	1	1	1	0	0		0	0	0	0	0	0	0
Urtica	Urticaceae																							0	0	0	0	0	0		0	0	0	0	0	0	0
Utricularia	Lentibulariaceae																							0	0	0	0	0	0		0	0	0	0	0	0	0
Valeriana	Valeriana																							0	0	0	0	0	0		0	0	0	0	0	0	0
Viburnum opulus	Viburnum																							0	0	0	0	0	0		0	0	0	0	0	0	0
Violaceae	Violaceae																							0	0	0	0	0	0		0	0	0	0	0	0	0
Viscum album	Viscaceae																							0	0	0	0	0	0		0	0	0	0	0	0	0
																																0	0	0	0	0	0

## Sheet: Illinskoe
			arctic /alpine dwarf shrub	arctic /boreal dwarf shrub	boreal evergreen conifer	boreal summergreen	boreal-temperate summergreen shrub	cool-boreal conifer shrub	cool-temperate conifer	desert forb	eurythermic conifer	grass	heath	sedge	steppe forb	temperate summergreen	cool-temperate summergreen	warm-temperate summergreen	southern warm-temperate summergreen	warm-temperate broadleaved evergreen	warm-temperate sclerophyll shrub			MEGABIOMES								MEGABIOMES
			aa	ab	bec	bs	bts	cbc	ctc	df	ec	g	h	s	sf	ts	ts1	ts2	ts3	wte	wte2			tundra	boreal forest	temperate forest	warm temperate forest	desert	grassland and dry shurbland		sqrt	tundra	boreal forest	temperate forest	warm temperate forest	desert	grassland and dry shurbland
Acer	Acer	Acer														1								0	0	1	1	0	0		0	0	0	0	0	0	0
Alnaster	Alnaster																							0	0	0	0	0	0		0	0	0	0	0	0	0
Alnus glutinisa	Alnus glutinisa	Alnus (incl. A. glutinosa and A. incana)				1										1								0	1	1	1	0	0		0	0	0	0	0	0	0
Alnus incana	Alnus incana	Alnus (incl. A. glutinosa and A. incana)				1										1								0	1	1	1	0	0		0	0	0	0	0	0	0
Alnus sp.	Alnus sp.	Alnus undiff.	1			1										1								1	1	1	1	0	0		0	0	0	0	0	0	0
Apiaceae	Apiaceae	Apiaceae													1									0	0	0	0	0	1		0	0	0	0	0	0	0
Artemisia	Artemisia	Artemisia								1					1									0	0	0	0	1	1		4.14632	0	0	0	0	4.14632	4.14632
Asteraceae	Asteraceae	Asteraceae undiff.													1									0	0	0	0	0	1		0	0	0	0	0	0	0
Betula humilis	Betula humilis																							0	0	0	0	0	0		1.60586	0	0	0	0	0	0
Betula nana	Betula nana	Betula nana-type	1																					1	0	0	0	0	0		1.07058	1.07058	0	0	0	0	0
Betula sect. Albae	Betula sect. Albae	Betula (Albae)				1																		0	1	1	0	0	0		4.07663	0	4.07663	4.07663	0	0	0
Botrychium boreale	Botrychium boreale																							0	0	0	0	0	0		0	0	0	0	0	0	0
Brassicaceae	Brassicaceae	Brassicaceae													1									0	0	0	0	0	1		0	0	0	0	0	0	0
Carpinus betulus	Carpinus betulus	Carpinus															1							0	1	1	1	0	0		0	0	0	0	0	0	0
Caryophyllaceae	Caryophyllaceae	Caryophyllaceae													1									0	0	0	0	0	1		0	0	0	0	0	0	0
Chenopodiaceae	Chenopodiaceae	Chenopodiaceae								1					1									0	0	0	0	1	1		1.60586	0	0	0	0	1.60586	1.60586
Cichoriaceae	Cichoriaceae																							0	0	0	0	0	0		0	0	0	0	0	0	0
Corylus avellana	Corylus avellana	Corylus															1							0	1	1	1	0	0		0	0	0	0	0	0	0
Cyperaceae	Cyperaceae	Cyperaceae												1										1	0	0	0	0	0		2.07316	2.07316	0	0	0	0	0
Dipsacaceae	Dipsacaceae																							0	0	0	0	0	0		0	0	0	0	0	0	0
Drosera	Drosera																							0	0	0	0	0	0		0	0	0	0	0	0	0
Ephedra	Ephedra	Ephedra								1														0	0	0	0	1	0		0.535288	0	0	0	0	0.535288	0
Equisetum	Equisetum																							0	0	0	0	0	0		0.927146	0	0	0	0	0	0
Ericales	Ericales	Ericales											1											1	1	1	1	0	0		0	0	0	0	0	0	0
Fabaceae	Fabaceae	Fabaceae													1									0	0	0	0	0	1		0	0	0	0	0	0	0
Fraxinus exelsior	Fraxinus exelsior	Fraxinus excelsior-type														1								0	0	1	1	0	0		0	0	0	0	0	0	0
Helianthemum	Helianthemum																							0	0	0	0	0	0		0	0	0	0	0	0	0
Hippophae rhamnoides	Hippophae rhamnoides	Hippophae													1									0	0	0	0	0	1		0.535288	0	0	0	0	0	0.535288
Humulus lupulus	Humulus lupulus	Cannabis													1									0	0	0	0	0	1		0	0	0	0	0	0	0
Larix	Larix	Larix				1																		0	1	1	0	0	0		0	0	0	0	0	0	0
Lycopodium annotinum	Lycopodium annotinum																							0	0	0	0	0	0		0	0	0	0	0	0	0
Lycopodium clavatum	Lycopodium clavatum																							0	0	0	0	0	0		0	0	0	0	0	0	0
Lycopodium complanatum	Lycopodium complanatum																							0	0	0	0	0	0		0	0	0	0	0	0	0
Lycopodium selago	Lycopodium selago																							0	0	0	0	0	0		0	0	0	0	0	0	0
Lythrum salicaria	Lythrum salicaria																							0	0	0	0	0	0		0	0	0	0	0	0	0
Menyanthes trifoliata	Menyanthes trifoliata																							0	0	0	0	0	0		0	0	0	0	0	0	0
Myriophyllum spicatum	Myriophyllum spicatum																							0	0	0	0	0	0		0.535288	0	0	0	0	0	0
Numphar	Numphar																							0	0	0	0	0	0		0	0	0	0	0	0	0
Nymphea alba	Nymphea alba																							0	0	0	0	0	0		0.535288	0	0	0	0	0	0
Nymphea candida	Nymphea candida																							0	0	0	0	0	0		0	0	0	0	0	0	0
Ophioglossum vulgatum	Ophioglossum vulgatum																							0	0	0	0	0	0		0	0	0	0	0	0	0
Osmunda cinnamomea	Osmunda cinnamomea																							0	0	0	0	0	0		0	0	0	0	0	0	0
Picea	Picea	Picea			1																			0	1	1	0	0	0		3.6305	0	3.6305	3.6305	0	0	0
Pinus cembra	Pinus cembra	Pinus (Haploxylon)			1			1																0	1	1	0	0	0		1.51402	0	1.51402	1.51402	0	0	0
Pinus sylvestris	Pinus sylvestris	Pinus (Diploxylon)									1													0	1	1	1	0	0		4.11162	0	4.11162	4.11162	4.11162	0	0
Poaceae	Poaceae	Poaceae										1												1	0	0	0	0	1		3.78506	3.78506	0	0	0	0	3.78506
Polygonaceae	Polygonaceae	Polygonaceae	1							1					1									1	0	0	0	1	1		0	0	0	0	0	0	0
Polypodiaceae	Polypodiaceae																							0	0	0	0	0	0		0.757011	0	0	0	0	0	0
Potamogeton	Potamogeton																							0	0	0	0	0	0		0.535288	0	0	0	0	0	0
Pteridium aquilinum	Pteridium aquilinum																							0	0	0	0	0	0		0.535288	0	0	0	0	0	0
Quercus petraea	Quercus petraea	Quercus undiff.														1				1				0	0	1	1	0	0		0	0	0	0	0	0	0
Quercus robur	Quercus robur	Quercus undiff.														1				1				0	0	1	1	0	0		0.535288	0	0	0.535288	0.535288	0	0
Ranunculaceae	Ranunculaceae	Ranunculaceae													1									0	0	0	0	0	1		0	0	0	0	0	0	0
Rosaceae	Rosaceae	Rosaceae													1									0	0	0	0	0	1		0	0	0	0	0	0	0
Sagittaria	Sagittaria																							0	0	0	0	0	0		0	0	0	0	0	0	0
Salix	Salix	Salix	1			1										1								1	1	1	1	0	0		1.93001	1.93001	1.93001	1.93001	1.93001	0	0
Salvinia natans	Salvinia natans																							0	0	0	0	0	0		0	0	0	0	0	0	0
Selaginella selaginoides	Selaginella selaginoides																							0	0	0	0	0	0		0	0	0	0	0	0	0
Sparganium	Sparganium																							0	0	0	0	0	0		0.535288	0	0	0	0	0	0
Sphagnum	Sphagnum																							0	0	0	0	0	0		0.535288	0	0	0	0	0	0
Stratiotes aloides	Stratiotes aloides																							0	0	0	0	0	0		0	0	0	0	0	0	0
Thalictrum	Thalictrum																							0	0	0	0	0	0		0.535288	0	0	0	0	0	0
Thalictrum minus	Thalictrum minus																							0	0	0	0	0	0		0	0	0	0	0	0	0
Thelecrania	Thelecrania																							0	0	0	0	0	0		0	0	0	0	0	0	0
Tilia cordata	Tilia cordata	Tilia															1							0	1	1	1	0	0		0	0	0	0	0	0	0
Tilia platyphyllos	Tilia platyphyllos	Tilia															1							0	1	1	1	0	0		0	0	0	0	0	0	0
Trapa natans	Trapa natans																							0	0	0	0	0	0		0	0	0	0	0	0	0
Typha latifolia	Typha latifolia																							0	0	0	0	0	0		0.757011	0	0	0	0	0	0
Ulmus campesre	Ulmus campesre	Ulmus															1							0	1	1	1	0	0		0	0	0	0	0	0	0
Ulmus laevis	Ulmus laevis	Ulmus															1							0	1	1	1	0	0		0.535288	0	0.535288	0.535288	0.535288	0	0
Ulmus scabra	Ulmus scabra	Ulmus															1							0	1	1	1	0	0		0	0	0	0	0	0	0
Urtica	Urtica																							0	0	0	0	0	0		0	0	0	0	0	0	0
Viburnum lantana	Viburnum lantana																							0	0	0	0	0	0		0	0	0	0	0	0	0
Viburnum opulus	Viburnum opulus																							0	0	0	0	0	0		0	0	0	0	0	0	0
Viscum album	Viscum album																							0	0	0	0	0	0		0	0	0	0	0	0	0
																																8.8588	15.7981	16.3334	7.11221	6.28747	10.0725

## Sheet: Klinge
		arctic /alpine dwarf shrub	arctic /boreal dwarf shrub	boreal evergreen conifer	boreal summergreen	boreal-temperate summergreen shrub	cool-boreal conifer shrub	cool-temperate conifer	desert forb	eurythermic conifer	grass	heath	sedge	steppe forb	temperate summergreen	cool-temperate summergreen	warm-temperate summergreen	southern warm-temperate summergreen	warm-temperate broadleaved evergreen	warm-temperate sclerophyll shrub				MEGABIOMES								MEGABIOMES
		aa	ab	bec	bs	bts	cbc	ctc	df	ec	g	h	s	sf	ts	ts1	ts2	ts3	wte	wte2				tundra	boreal forest	temperate forest	warm temperate forest	desert	grassland and dry shurbland		SQRT	tundra	boreal forest	temperate forest	warm temperate forest	desert	grassland and dry shurbland
Abies	Abies			1				1																0	1	1	0	0	0		0.590281	0	0.590281	0.590281	0	0	0
Acer	Acer														1									0	0	1	1	0	0		0	0	0	0	0	0	0
Alnaster																								0	0	0	0	0	0		1.0224	0	0	0	0	0	0
Alnus	Alnus undiff.	1			1										1									1	1	1	1	0	0		3.09546	3.09546	3.09546	3.09546	3.09546	0	0
Apiaceae	Apiaceae													1										0	0	0	0	0	1		1.0224	0	0	0	0	0	1.0224
Artemisia	Artemisia								1					1										0	0	0	0	1	1		1.25218	0	0	0	0	1.25218	1.25218
Asteraceae	Asteraceae undiff.													1										0	0	0	0	0	1		0.590281	0	0	0	0	0	0.590281
Betula humilis	Betula undiff	1			1																			1	1	1	0	0	0		0.722944	0.722944	0.722944	0.722944	0	0	0
Betula nana	Betula nana-type	1																						1	0	0	0	0	0		0	0	0	0	0	0	0
Betula sect. Albae	Betula (Albae)				1																			0	1	1	0	0	0		3.09546	0	3.09546	3.09546	0	0	0
Botryococcus																								0	0	0	0	0	0		0.417392	0	0	0	0	0	0
Brassicaceae	Brassicaceae													1										0	0	0	0	0	1		1.38433	0	0	0	0	0	1.38433
Carpinus	Carpinus															1								0	1	1	1	0	0		0	0	0	0	0	0	0
Chenopodiaceae	Chenopodiaceae								1					1										0	0	0	0	1	1		0	0	0	0	0	0	0
Corylus	Corylus															1								0	1	1	1	0	0		0	0	0	0	0	0	0
Cyperaceae	Cyperaceae												1											1	0	0	0	0	0		1.18056	1.18056	0	0	0	0	0
Equisetum																								0	0	0	0	0	0		0	0	0	0	0	0	0
Ericales	Ericales											1												1	1	1	1	0	0		2.00174	2.00174	2.00174	2.00174	2.00174	0	0
Fabaceae	Fabaceae													1										0	0	0	0	0	1		0.590281	0	0	0	0	0	0.590281
Fraxinus																								0	0	0	0	0	0		0	0	0	0	0	0	0
Helianthemum																								0	0	0	0	0	0		0	0	0	0	0	0	0
Ilex																								0	0	0	0	0	0		0	0	0	0	0	0	0
Lamiaceae	Lamiaceae													1										0	0	0	0	0	1		0	0	0	0	0	0	0
Lycopodium clavatum																								0	0	0	0	0	0		0.417392	0	0	0	0	0	0
Myrica																								0	0	0	0	0	0		0	0	0	0	0	0	0
Myriophyllum																								0	0	0	0	0	0		0	0	0	0	0	0	0
Nuphar																								0	0	0	0	0	0		0	0	0	0	0	0	0
Pediastrum																								0	0	0	0	0	0		0.722944	0	0	0	0	0	0
Picea	Picea			1																				0	1	1	0	0	0		1.95774	0	1.95774	1.95774	0	0	0
Pinus cembra	Pinus (Haploxylon)			1			1																	0	1	1	0	0	0		1.50493	0	1.50493	1.50493	0	0	0
Pinus sylvestris	Pinus (Diploxylon)									1														0	1	1	1	0	0		6.14857	0	6.14857	6.14857	6.14857	0	0
Plantago	Plantago													1										0	0	0	0	0	1		0	0	0	0	0	0	0
Poaceae	Poaceae										1													1	0	0	0	0	1		1.61655	1.61655	0	0	0	0	1.61655
Polygonaceae	Polygonaceae	1							1					1										1	0	0	0	1	1		1.61655	1.61655	0	0	0	1.61655	1.61655
Polypodiaceae																								0	0	0	0	0	0		1.91273	0	0	0	0	0	0
Quercus	Quercus (deciduous)														1									0	0	1	1	0	0		0	0	0	0	0	0	0
Ranunculaceae	Ranunculaceae													1										0	0	0	0	0	1		0.933317	0	0	0	0	0	0.933317
Rhamnus																								0	0	0	0	0	0		2.04479	0	0	0	0	0	0
Rosaceae	Rosaceae													1										0	0	0	0	0	1		1.61655	0	0	0	0	0	1.61655
Salix	Salix	1			1										1									1	1	1	1	0	0		0.933317	0.933317	0.933317	0.933317	0.933317	0	0
Saxifragaceae	Saxifragaceae	1																						1	0	0	0	0	0		0	0	0	0	0	0	0
Scrophulariaceae																								0	0	0	0	0	0		0	0	0	0	0	0	0
Sparganium																								0	0	0	0	0	0		0	0	0	0	0	0	0
Sphagnum																								0	0	0	0	0	0		0.722944	0	0	0	0	0	0
Taxus																								0	0	0	0	0	0		0	0	0	0	0	0	0
Thalictrum																								0	0	0	0	0	0		0	0	0	0	0	0	0
Tilia cordata	Tilia															1								0	1	1	1	0	0		0	0	0	0	0	0	0
Tilia platyphyllos	Tilia															1								0	1	1	1	0	0		0	0	0	0	0	0	0
Tuberaria																								0	0	0	0	0	0		2.00174	0	0	0	0	0	0
Tuberaria guttata+Tuberaria sp.																								0	0	0	0	0	0		0	0	0	0	0	0	0
Typha latifolia																								0	0	0	0	0	0		0	0	0	0	0	0	0
Ulmus	Ulmus															1								0	1	1	1	0	0		0	0	0	0	0	0	0
Urtica																								0	0	0	0	0	0		0	0	0	0	0	0	0
Valeriana																								0	0	0	0	0	0		0	0	0	0	0	0	0
																																11.1671	20.0504	20.0504	12.1791	2.86873	10.6224

## Sheet: Horozkia
		arctic /alpine dwarf shrub	arctic /boreal dwarf shrub	boreal evergreen conifer	boreal summergreen	boreal-temperate summergreen shrub	cool-boreal conifer shrub	cool-temperate conifer	desert forb	eurythermic conifer	grass	heath	sedge	steppe forb	temperate summergreen	cool-temperate summergreen	warm-temperate summergreen	southern warm-temperate summergreen	warm-temperate broadleaved evergreen	warm-temperate sclerophyll shrub			MEGABIOMES								MEGABIOMES
		aa	ab	bec	bs	bts	cbc	ctc	df	ec	g	h	s	sf	ts	ts1	ts2	ts3	wte	wte2			tundra	boreal forest	temperate forest	warm temperate forest	desert	grassland and dry shurbland		Sqrt	tundra	boreal forest	temperate forest	warm temperate forest	desert	grassland and dry shurbland
Abies alba	Abies			1				1															0	1	1	0	0	0		0	0	0	0	0	0	0
Acer	Acer														1								0	0	1	1	0	0		0	0	0	0	0	0	0
Achillea type																							0	0	0	0	0	0		0	0	0	0	0	0	0
Alnus glutinosa type	Alnus (incl. A. glutinosa and A. incana)				1										1								0	1	1	1	0	0		2.26819	0	2.26819	2.26819	2.26819	0	0
Alnus viridis	Alnus undiff.	1			1										1								1	1	1	1	0	0		0	0	0	0	0	0	0
Anemone type																							0	0	0	0	0	0		0	0	0	0	0	0	0
Apiaceae undiff.	Apiaceae													1									0	0	0	0	0	1		0.567048	0	0	0	0	0	0.567048
Arenaria type																							0	0	0	0	0	0		0	0	0	0	0	0	0
Armeria maritima A-type																							0	0	0	0	0	0		0	0	0	0	0	0	0
Armeria maritima B-type																							0	0	0	0	0	0		0	0	0	0	0	0	0
Artemisia	Artemisia								1					1									0	0	0	0	1	1		3.05365	0	0	0	0	3.05365	3.05365
Aster type	Asteraceae undiff.													1									0	0	0	0	0	1		0	0	0	0	0	0	0
Asteraceae undiff.	Asteraceae undiff.													1									0	0	0	0	0	1		0.982156	0	0	0	0	0	0.982156
Betula alba type	Betula (Albae)				1																		0	1	1	0	0	0		2.53592	0	2.53592	2.53592	0	0	0
Betula nana	Betula nana-type	1																					1	0	0	0	0	0		1.50027	1.50027	0	0	0	0	0
Brassicaceae	Brassicaceae													1									0	0	0	0	0	1		0	0	0	0	0	0	0
Bruckenthalia spiculifol.																							0	0	0	0	0	0		0	0	0	0	0	0	0
Bupleurum																							0	0	0	0	0	0		0	0	0	0	0	0	0
Calluna vulgaris																							0	0	0	0	0	0		0.801927	0	0	0	0	0	0
Campanula																							0	0	0	0	0	0		0	0	0	0	0	0	0
Carpinus	Carpinus															1							0	1	1	1	0	0		1.50027	0	1.50027	1.50027	1.50027	0	0
Caryophyllaceae undiff.	Caryophyllaceae													1									0	0	0	0	0	1		0	0	0	0	0	0	0
Cerastium type																							0	0	0	0	0	0		0	0	0	0	0	0	0
Chenopodiaceae	Chenopodiaceae								1					1									0	0	0	0	1	1		1.96431	0	0	0	0	1.96431	1.96431
Cichoriaceae	Asteraceae (Cichorioideae)													1									0	0	0	0	0	1		0	0	0	0	0	0	0
Corylus avellana	Corylus															1							0	1	1	1	0	0		1.50027	0	1.50027	1.50027	1.50027	0	0
Cyperaceae	Cyperaceae												1										1	0	0	0	0	0		3.05365	3.05365	0	0	0	0	0
Dianthus type																							0	0	0	0	0	0		0	0	0	0	0	0	0
Empetrum																							0	0	0	0	0	0		0	0	0	0	0	0	0
Equisetum																							0	0	0	0	0	0		0.982156	0	0	0	0	0	0
Ericaceae undiff.																							0	0	0	0	0	0		0.801927	0	0	0	0	0	0
Filicales monolete																							0	0	0	0	0	0		1.38898	0	0	0	0	0	0
Filipendula																							0	0	0	0	0	0		0	0	0	0	0	0	0
Fraxinus																							0	0	0	0	0	0		0.801927	0	0	0	0	0	0
Gentiana campestris type																							0	0	0	0	0	0		0	0	0	0	0	0	0
Hedera helix																							0	0	0	0	0	0		0	0	0	0	0	0	0
Helianthemum nummular. t.																							0	0	0	0	0	0		0.801927	0	0	0	0	0	0
Hippophae rhamnoides	Hippophae													1									0	0	0	0	0	1		0.567048	0	0	0	0	0	0.567048
Humulus lupulus	Cannabis													1									0	0	0	0	0	1		0.567048	0	0	0	0	0	0.567048
Isoetes																							0	0	0	0	0	0		0	0	0	0	0	0	0
Juniperus	Juniperus									1													0	1	1	1	0	0		2.83524	0	2.83524	2.83524	2.83524	0	0
Larix	Larix				1																		0	1	1	0	0	0		0.567048	0	0.567048	0.567048	0	0	0
Myriophyllum alternifol.																							0	0	0	0	0	0		0	0	0	0	0	0	0
Myriophyllum verticillat.																							0	0	0	0	0	0		0	0	0	0	0	0	0
Nuphar																							0	0	0	0	0	0		0	0	0	0	0	0	0
Oxyria digyna cf.																							0	0	0	0	0	0		0	0	0	0	0	0	0
Phragmites type																							0	0	0	0	0	0		0.567048	0	0	0	0	0	0
Picea abies type	Picea			1																			0	1	1	0	0	0		0.982156	0	0.982156	0.982156	0	0	0
Pinus cembra type	Pinus (Haploxylon)			1			1																0	1	1	0	0	0		0	0	0	0	0	0	0
Pinus sylvestris type	Pinus (Diploxylon)									1													0	1	1	1	0	0		5.00803	0	5.00803	5.00803	5.00803	0	0
Plantago major	Plantago													1									0	0	0	0	0	1		0	0	0	0	0	0	0
Plantago media	Plantago													1									0	0	0	0	0	1		0	0	0	0	0	0	0
Poaceae undiff.	Poaceae										1												1	0	0	0	0	1		3.63088	3.63088	0	0	0	0	3.63088
Polygonum amphibium	Polygonaceae	1							1					1									1	0	0	0	1	1		0	0	0	0	0	0	0
Polygonum aviculare type	Polygonaceae	1							1					1									1	0	0	0	1	1		0	0	0	0	0	0	0
Polygonum bistorta/vivip.	Polygonaceae	1							1					1									1	0	0	0	1	1		0.567048	0.567048	0	0	0	0.567048	0.567048
Populus	Populus				1																		0	1	1	0	0	0		0	0	0	0	0	0	0
Potamogeton sect. Coleog.																							0	0	0	0	0	0		0	0	0	0	0	0	0
Potamogeton sect. Eupot.																							0	0	0	0	0	0		0	0	0	0	0	0	0
Potentilla type																							0	0	0	0	0	0		0	0	0	0	0	0	0
Pteridium aquilinum																							0	0	0	0	0	0		0	0	0	0	0	0	0
Quercus	Quercus (deciduous)														1								0	0	1	1	0	0		1.1341	0	0	1.1341	1.1341	0	0
Ranunculus acris type	Ranunculaceae													1									0	0	0	0	0	1		0	0	0	0	0	0	0
Ranunculus flammula type	Ranunculaceae													1									0	0	0	0	0	1		0	0	0	0	0	0	0
Ranunculus trichoph. type	Ranunculaceae													1									0	0	0	0	0	1		0	0	0	0	0	0	0
Ribes alpinum type																							0	0	0	0	0	0		0	0	0	0	0	0	0
Rosaceae undiff.	Rosaceae													1									0	0	0	0	0	1		0.567048	0	0	0	0	0	0.567048
Rubiaceae	Rubiaceae													1									0	0	0	0	0	1		0	0	0	0	0	0	0
Rumex acetosa type																							0	0	0	0	0	0		0	0	0	0	0	0	0
Rumex acetosella																							0	0	0	0	0	0		0	0	0	0	0	0	0
Salix polaris type	Salix	1			1										1								1	1	1	1	0	0		0.982156	0.982156	0.982156	0.982156	0.982156	0	0
Salix undiff.	Salix	1			1										1								1	1	1	1	0	0		0	0	0	0	0	0	0
Sparganium type																							0	0	0	0	0	0		0.567048	0	0	0	0	0	0
Taxus baccata																							0	0	0	0	0	0		0	0	0	0	0	0	0
Thalictrum																							0	0	0	0	0	0		0	0	0	0	0	0	0
Thelypteris palustris																							0	0	0	0	0	0		0	0	0	0	0	0	0
Tilia cordata type	Tilia															1							0	1	1	1	0	0		0.567048	0	0.567048	0.567048	0.567048	0	0
Tilia platyphyllos type	Tilia															1							0	1	1	1	0	0		0	0	0	0	0	0	0
Tilia tomentosa type	Tilia															1							0	1	1	1	0	0		0	0	0	0	0	0	0
Trifolium type																							0	0	0	0	0	0		0	0	0	0	0	0	0
Typha latifolia																							0	0	0	0	0	0		0	0	0	0	0	0	0
Ulmus	Ulmus															1							0	1	1	1	0	0		0.567048	0	0.567048	0.567048	0.567048	0	0
Viscum																							0	0	0	0	0	0		0	0	0	0	0	0	0
																															9.734	19.3134	20.4475	16.3623	5.58501	12.4662
At Horiszkia Duze Brassicaceae is mainly of local (water edge) origin, whereas Humulus lupulus is associated with riparian forest; their contributions to the pollen spectrum are however 1% or less and so would not have influenced the biomization results.
