# Supplementary material for: Terrestrial biosphere changes over the last 120 kyr
Source: Copernicus journal article supplement (doi:10.5194/cp-12-51-2016), 2016-01-18
Supplement: Supplementary file 1 [file cp-12-51-2016-supplement.zip › supplement/Europe/BiomizationSouthernEuropeElengaetal.xls]

## Sheet: Montti
		Arctic/alpine dwarf shrub	Boreal evergreen conifer	Boreal summergreen	Cool-temperate conifer	Intermediate-temperate conifer	Desert forb/shrub	Eurythermic conifer	Grass	Heath	Steppe forb/shrub	Temperate summergreen	Cool-temperate summergreen	Warm-temperate summergreen	Warm-temperate broadleaved evergreen	Cool-temperate broadleaf evergreen	Warm-temperate sclerophyll shrub				MEGABIOMES								MEGABIOMES
		aa	bec	bs	ctc	ctc1	df	ec	g	h	sf	ts	ts1	ts2	wte	wte1	wte2					boreal forest	temperate forest	warm-temperate forest	tundra	grassland and dry shrubland	desert		SQRT	boreal forest	temperate forest	warm-temperate forest	tundra	grassland and dry shrubland	desert
Abies	Abies	0	1	0	1	0	0	0	0	0	0	0	0	0	0	0	0					1	1	0	0	0	0		0	0	0	0	0	0	0
Acer																						0	0	0	0	0	0		0	0	0	0	0	0	0
Achillea (Anthemis) type																						0	0	0	0	0	0		0	0	0	0	0	0	0
Agrostemma githago																						0	0	0	0	0	0		0	0	0	0	0	0	0
Allium type																						0	0	0	0	0	0		0	0	0	0	0	0	0
Alnus	Alnus	1	0	1	0	0	0	0	0	0	0	1	0	0	0	0	0					1	1	1	1	0	0		0	0	0	0	0	0	0
Anagallis arvensis																						0	0	0	0	0	0		0	0	0	0	0	0	0
Anagallis tenella																						0	0	0	0	0	0		0	0	0	0	0	0	0
Anemone nemorosa type																						0	0	0	0	0	0		0	0	0	0	0	0	0
Apiaceae	Apiaceae	0	0	0	0	0	0	0	0	0	1	0	0	0	0	0	0					0	0	0	0	1	0		0	0	0	0	0	0	0
Armeria	Armeria	0	0	0	0	0	0	0	0	0	1	0	0	0	0	0	0					0	0	0	0	1	0		0	0	0	0	0	0	0
Artemisia	Artemisia	0	0	0	0	0	0	0	0	0	1	0	0	0	0	0	0					0	0	0	0	1	0		0	0	0	0	0	0	0
Asphodelus type																						0	0	0	0	0	0		0	0	0	0	0	0	0
Asteraceae Liguliflorae	Asteraceae	0	0	0	0	0	0	0	0	0	1	0	0	0	0	0	0					0	0	0	0	1	0		0	0	0	0	0	0	0
Betula	Betula	1	0	1	0	0	0	0	0	0	0	0	0	0	0	0	0					1	1	0	1	0	0		0	0	0	0	0	0	0
Boraginaceae																						0	0	0	0	0	0		0	0	0	0	0	0	0
Brassicaceae	Brassicaceae	0	0	0	0	0	0	0	0	0	1	0	0	0	0	0	0					0	0	0	0	1	0		0	0	0	0	0	0	0
Bryophyte spores undiff.																						0	0	0	0	0	0		0	0	0	0	0	0	0
Bupleurum type																						0	0	0	0	0	0		0	0	0	0	0	0	0
Buxus	Buxus	0	0	0	0	0	0	0	0	0	0	0	0	0	0	1	0					0	1	1	0	0	0		0	0	0	0	0	0	0
Calligonum type																						0	0	0	0	0	0		0	0	0	0	0	0	0
Campanulaceae	Campanulaceae	0	0	0	0	0	0	0	0	0	1	0	0	0	0	0	0					0	0	0	0	1	0		0	0	0	0	0	0	0
Cannabiaceae																						0	0	0	0	0	0		0	0	0	0	0	0	0
Carpinus betulus	Carpinus	0	0	0	0	0	0	0	0	0	0	0	1	0	0	0	0					1	1	1	0	0	0		0	0	0	0	0	0	0
Caryophyllacea	Caryophyllaceae	0	0	0	0	0	0	0	0	0	1	0	0	0	0	0	0					0	0	0	0	1	0		0	0	0	0	0	0	0
Castanea																						0	0	0	0	0	0		0	0	0	0	0	0	0
Cedrus	Cedrus	0	0	0	0	1	0	0	0	0	0	0	0	0	0	0	0					1	1	0	0	0	0		0	0	0	0	0	0	0
Celtis																						0	0	0	0	0	0		0	0	0	0	0	0	0
Centaurea cf. C. cyanus/montana type	Centaurea	0	0	0	0	0	0	0	0	0	1	0	0	0	0	0	0					0	0	0	0	1	0		0	0	0	0	0	0	0
Centaurea solstitialis (scab. nigra)type	Centaurea	0	0	0	0	0	0	0	0	0	1	0	0	0	0	0	0					0	0	0	0	1	0		0	0	0	0	0	0	0
Ceratophyllum																						0	0	0	0	0	0		0	0	0	0	0	0	0
Cereal type																						0	0	0	0	0	0		0	0	0	0	0	0	0
cf Callitriche																						0	0	0	0	0	0		0	0	0	0	0	0	0
cf Chrysosplenium																						0	0	0	0	0	0		0	0	0	0	0	0	0
cf Circaea																						0	0	0	0	0	0		0	0	0	0	0	0	0
cf Elatine																						0	0	0	0	0	0		0	0	0	0	0	0	0
cf Frangula/Bruckenthalia																						0	0	0	0	0	0		0	0	0	0	0	0	0
cf Mercurialis																						0	0	0	0	0	0		0	0	0	0	0	0	0
cf Onobrychis type																						0	0	0	0	0	0		0	0	0	0	0	0	0
cf Platanus																						0	0	0	0	0	0		0	0	0	0	0	0	0
cf Samolus valerandi																						0	0	0	0	0	0		0	0	0	0	0	0	0
cf Trichomanes																						0	0	0	0	0	0		0	0	0	0	0	0	0
cf. Alchemilla																						0	0	0	0	0	0		0	0	0	0	0	0	0
cf. Androsace																						0	0	0	0	0	0		0	0	0	0	0	0	0
cf. Centaurium																						0	0	0	0	0	0		0	0	0	0	0	0	0
cf. Euphorbia																						0	0	0	0	0	0		0	0	0	0	0	0	0
Chenopodiaceae	Chenopodiaceae	0	0	0	0	0	0	0	0	0	1	0	0	0	0	0	0					0	0	0	0	1	0		0	0	0	0	0	0	0
Cirsium																						0	0	0	0	0	0		0	0	0	0	0	0	0
Cladium																						0	0	0	0	0	0		0	0	0	0	0	0	0
Compositae																						0	0	0	0	0	0		0	0	0	0	0	0	0
Consolida ambigua type																						0	0	0	0	0	0		0	0	0	0	0	0	0
Cornaceae																						0	0	0	0	0	0		0	0	0	0	0	0	0
Corylus	Corylus	0	0	0	0	0	0	0	0	0	0	0	1	0	0	0	0					1	1	1	0	0	0		0	0	0	0	0	0	0
Cupressaceae type																						0	0	0	0	0	0		0	0	0	0	0	0	0
Cyperaceae																						0	0	0	0	0	0		0	0	0	0	0	0	0
Digitalis type	Dipsacaceae	0	0	0	0	0	0	0	0	0	1	0	0	0	0	0	0					0	0	0	0	1	0		0	0	0	0	0	0	0
Dipsacaceae																						0	0	0	0	0	0		0	0	0	0	0	0	0
Dryopteris																						0	0	0	0	0	0		0	0	0	0	0	0	0
Echium type																						0	0	0	0	0	0		0	0	0	0	0	0	0
Ephedra distachya	Ephedra	0	0	0	0	0	1	0	0	0	0	0	0	0	0	0	0					0	0	0	0	0	1		0	0	0	0	0	0	0
Ephedra fragilis type	Ephedra fragilis	0	0	0	0	0	0	0	0	0	1	0	0	0	0	0	0					0	0	0	0	1	0		0	0	0	0	0	0	0
Epilobium																						0	0	0	0	0	0		0	0	0	0	0	0	0
Equisetum																						0	0	0	0	0	0		0	0	0	0	0	0	0
Ericaceae	Ericaceae	0	0	0	0	0	0	0	0	1	0	0	0	0	0	0	0					1	1	1	1	0	0		0	0	0	0	0	0	0
Euonymus europaeus																						0	0	0	0	0	0		0	0	0	0	0	0	0
Fabaceae (Leguminosae)																						0	0	0	0	0	0		0	0	0	0	0	0	0
Fagus	Fagus	0	0	0	0	0	0	0	0	0	0	0	1	0	0	0	0					1	1	1	0	0	0		0	0	0	0	0	0	0
Filipendula																						0	0	0	0	0	0		0	0	0	0	0	0	0
Fraxinus (undiff)																						0	0	0	0	0	0		0	0	0	0	0	0	0
Fraxinus excelsior type	Fraxinus excelsior	0	0	0	0	0	0	0	0	0	0	1	0	0	0	0	0					0	1	1	0	0	0		0	0	0	0	0	0	0
Fraxinus ornus																						0	0	0	0	0	0		0	0	0	0	0	0	0
Fumana																						0	0	0	0	0	0		0	0	0	0	0	0	0
Galium type																						0	0	0	0	0	0		0	0	0	0	0	0	0
Geranium																						0	0	0	0	0	0		0	0	0	0	0	0	0
Guttiferae cf. Hypericum																						0	0	0	0	0	0		0	0	0	0	0	0	0
Hedera	Hedera	0	0	0	0	0	0	0	0	0	0	0	0	0	0	1	0					0	1	1	0	0	0		0	0	0	0	0	0	0
Helianthemum	Helianthemum	0	0	0	0	0	0	0	0	0	1	0	0	0	0	0	0					0	0	0	0	1	0		0	0	0	0	0	0	0
Helleborus foetidus																						0	0	0	0	0	0		0	0	0	0	0	0	0
Helleborus viridis																						0	0	0	0	0	0		0	0	0	0	0	0	0
Hippophae	Hippophae	0	0	0	0	0	0	0	0	0	1	0	0	0	0	0	0					0	0	0	0	1	0		0	0	0	0	0	0	0
Ilex	Ilex	0	0	0	0	0	0	0	0	0	0	0	0	0	0	1	0					0	1	1	0	0	0		0	0	0	0	0	0	0
Indeterminable (broken)																						0	0	0	0	0	0		0	0	0	0	0	0	0
Indeterminable (concealed)																						0	0	0	0	0	0		0	0	0	0	0	0	0
Indeterminable (crumpled)																						0	0	0	0	0	0		0	0	0	0	0	0	0
Indeterminable (degraded)																						0	0	0	0	0	0		0	0	0	0	0	0	0
Juglans																						0	0	0	0	0	0		0	0	0	0	0	0	0
Labiatae (Marrubium type)																						0	0	0	0	0	0		0	0	0	0	0	0	0
Labiatae (Scutellaria type)																						0	0	0	0	0	0		0	0	0	0	0	0	0
Larix																						0	0	0	0	0	0		0	0	0	0	0	0	0
Lemnaceae																						0	0	0	0	0	0		0	0	0	0	0	0	0
Liliaceae (\Fritillaria type)																						0	0	0	0	0	0		0	0	0	0	0	0	0
Liliaceae undifferentiated																						0	0	0	0	0	0		0	0	0	0	0	0	0
Linum																						0	0	0	0	0	0		0	0	0	0	0	0	0
Lithospermum																						0	0	0	0	0	0		0	0	0	0	0	0	0
Lonicera																						0	0	0	0	0	0		0	0	0	0	0	0	0
Lotus																						0	0	0	0	0	0		0	0	0	0	0	0	0
Malvaceae																						0	0	0	0	0	0		0	0	0	0	0	0	0
Mentha type																						0	0	0	0	0	0		0	0	0	0	0	0	0
Menyanthes																						0	0	0	0	0	0		0	0	0	0	0	0	0
Monolete spores																						0	0	0	0	0	0		0	0	0	0	0	0	0
Myrio. Spic type																						0	0	0	0	0	0		0	0	0	0	0	0	0
Myrio. Verticillatum																						0	0	0	0	0	0		0	0	0	0	0	0	0
Myrio.alt																						0	0	0	0	0	0		0	0	0	0	0	0	0
Myriophyllum																						0	0	0	0	0	0		0	0	0	0	0	0	0
Nuphar																						0	0	0	0	0	0		0	0	0	0	0	0	0
Nymphaea																						0	0	0	0	0	0		0	0	0	0	0	0	0
Olea	Olea	0	0	0	0	0	0	0	0	0	0	0	0	0	0	0	1					0	0	0	0	1	0		0	0	0	0	0	0	0
Ononis																						0	0	0	0	0	0		0	0	0	0	0	0	0
Ostrya	Ostrya	0	0	0	0	0	0	0	0	0	0	0	0	1	0	0	0					0	1	1	0	0	0		0	0	0	0	0	0	0
Other ferns																						0	0	0	0	0	0		0	0	0	0	0	0	0
other herbs																						0	0	0	0	0	0		0	0	0	0	0	0	0
Other woody taxa																						0	0	0	0	0	0		0	0	0	0	0	0	0
Oxyria type																						0	0	0	0	0	0		0	0	0	0	0	0	0
Papaveraceae																						0	0	0	0	0	0		0	0	0	0	0	0	0
Pedicularis																						0	0	0	0	0	0		0	0	0	0	0	0	0
Phyillyrea	Phillyrea	0	0	0	0	0	0	0	0	0	0	0	0	0	0	0	1					0	0	0	0	1	0		0	0	0	0	0	0	0
Picea	Picea	0	1	0	0	0	0	0	0	0	0	0	0	0	0	0	0					1	1	0	0	0	0		0	0	0	0	0	0	0
Pinus																						0	0	0	0	0	0		0	0	0	0	0	0	0
Pinus haploxylon																						0	0	0	0	0	0		0	0	0	0	0	0	0
Pistacia	Pistacea	0	0	0	0	0	0	0	0	0	0	0	0	0	0	0	1					0	0	0	0	1	0		0	0	0	0	0	0	0
Plantago undiff	Plantago	0	0	0	0	0	0	0	0	0	1	0	0	0	0	0	0					0	0	0	0	1	0		0	0	0	0	0	0	0
Poaceae	Poaceae	0	0	0	0	0	0	0	1	0	0	0	0	0	0	0	0					0	0	0	1	1	0		0	0	0	0	0	0	0
Polygon persicaria type	Polygonum	0	0	0	0	0	0	0	0	0	1	0	0	0	0	0	0					0	0	0	0	1	0		0	0	0	0	0	0	0
Polygonum amphibium	Polygonum	0	0	0	0	0	0	0	0	0	1	0	0	0	0	0	0					0	0	0	0	1	0		0	0	0	0	0	0	0
Polygonum bistorta type	Polygonum	0	0	0	0	0	0	0	0	0	1	0	0	0	0	0	0					0	0	0	0	1	0		0	0	0	0	0	0	0
Polypodium																						0	0	0	0	0	0		0	0	0	0	0	0	0
Populus	Populus	0	0	0	0	0	0	0	0	0	0	1	0	0	0	0	0					0	1	1	0	0	0		0	0	0	0	0	0	0
Potamogeton																						0	0	0	0	0	0		0	0	0	0	0	0	0
Potentilla type																						0	0	0	0	0	0		0	0	0	0	0	0	0
Primulaceae																						0	0	0	0	0	0		0	0	0	0	0	0	0
Prunus spinosa																						0	0	0	0	0	0		0	0	0	0	0	0	0
Pteridium																						0	0	0	0	0	0		0	0	0	0	0	0	0
Pterocarya																						0	0	0	0	0	0		0	0	0	0	0	0	0
Quercus	Quercus (deciduous)	0	0	0	0	0	0	0	0	0	0	1	0	0	0	0	0					0	1	1	0	0	0		0	0	0	0	0	0	0
Quercus ilex	Quercus (evergreen)	0	0	0	0	0	0	0	0	0	0	0	0	0	1	0	0					0	0	1	0	1	0		0	0	0	0	0	0	0
Ranunculus																						0	0	0	0	0	0		0	0	0	0	0	0	0
Resedaceae																						0	0	0	0	0	0		0	0	0	0	0	0	0
Rhamnaceae																						0	0	0	0	0	0		0	0	0	0	0	0	0
Rosaceae	Rosaceae	0	0	0	0	0	0	0	0	0	1	0	0	0	0	0	0					0	0	0	0	1	0		0	0	0	0	0	0	0
Rumex																						0	0	0	0	0	0		0	0	0	0	0	0	0
Salix	Rumex	0	0	0	0	0	0	0	0	0	1	0	0	0	0	0	0					0	0	0	0	1	0		0	0	0	0	0	0	0
Sambucus	Salix	1	0	1	0	0	0	0	0	0	0	1	0	0	0	0	0					1	1	1	1	0	0		0	0	0	0	0	0	0
Sanguisorba minor	Sanguisorba	0	0	0	0	0	0	0	0	0	1	0	0	0	0	0	0					0	0	0	0	1	0		0	0	0	0	0	0	0
Sanguisorbsa officinalis	Sanguisorba	0	0	0	0	0	0	0	0	0	1	0	0	0	0	0	0					0	0	0	0	1	0		0	0	0	0	0	0	0
Saxifragaceae	Saxifrage	1	0	0	0	0	0	0	0	0	0	0	0	0	0	0	0					0	0	0	1	0	0		0	0	0	0	0	0	0
Scilla type																						0	0	0	0	0	0		0	0	0	0	0	0	0
Scropulariaceae undiff																						0	0	0	0	0	0		0	0	0	0	0	0	0
Serratula type																						0	0	0	0	0	0		0	0	0	0	0	0	0
Solidago (Aster) type																						0	0	0	0	0	0		0	0	0	0	0	0	0
Sorbus																						0	0	0	0	0	0		0	0	0	0	0	0	0
sphagnum																						0	0	0	0	0	0		0	0	0	0	0	0	0
Tamarix																						0	0	0	0	0	0		0	0	0	0	0	0	0
Taxus																						0	0	0	0	0	0		0	0	0	0	0	0	0
Thalictrum	Thalictrum	0	0	0	0	0	0	0	0	0	1	0	0	0	0	0	0					0	0	0	0	1	0		0	0	0	0	0	0	0
Thymelaeaceae cf. Daphne																						0	0	0	0	0	0		0	0	0	0	0	0	0
Tilia	Tilia	0	0	0	0	0	0	0	0	0	0	0	1	0	0	0	0					1	1	1	0	0	0		0	0	0	0	0	0	0
Trifolium type																						0	0	0	0	0	0		0	0	0	0	0	0	0
Trilete spores																						0	0	0	0	0	0		0	0	0	0	0	0	0
Typha angustifolia																						0	0	0	0	0	0		0	0	0	0	0	0	0
Typha latifolia																						0	0	0	0	0	0		0	0	0	0	0	0	0
Ulmus	Ulmus	0	0	0	0	0	0	0	0	0	0	0	1	0	0	0	0					1	1	1	0	0	0		0	0	0	0	0	0	0
Unknown																						0	0	0	0	0	0		0	0	0	0	0	0	0
Urtica type																						0	0	0	0	0	0		0	0	0	0	0	0	0
Valeriana																						0	0	0	0	0	0		0	0	0	0	0	0	0
Veronica type																						0	0	0	0	0	0		0	0	0	0	0	0	0
Viburnum																						0	0	0	0	0	0		0	0	0	0	0	0	0
Vicia																						0	0	0	0	0	0		0	0	0	0	0	0	0
Viola palustris type																						0	0	0	0	0	0		0	0	0	0	0	0	0
Viscum																						0	0	0	0	0	0		0	0	0	0	0	0	0
Vitis																						0	0	0	0	0	0		0	0	0	0	0	0	0
																														0	0	0	0	0	0

## Sheet: Ioannina
		Arctic/alpine dwarf shrub	Boreal evergreen conifer	Boreal summergreen	Cool-temperate conifer	Intermediate-temperate conifer	Desert forb/shrub	Eurythermic conifer	Grass	Heath	Steppe forb/shrub	Temperate summergreen	Cool-temperate summergreen	Warm-temperate summergreen	Warm-temperate broadleaved evergreen	Cool-temperate broadleaf evergreen	Warm-temperate sclerophyll shrub				MEGABIOMES								MEGABIOMES
		aa	bec	bs	ctc	ctc1	df	ec	g	h	sf	ts	ts1	ts2	wte	wte1	wte2					boreal forest	temperate forest	warm-temperate forest	tundra	grassland and dry shrubland	desert		sqrt	boreal forest	temperate forest	warm-temperate forest	tundra	grassland and dry shrubland	desert
Abies	Abies	0	1	0	1	0	0	0	0	0	0	0	0	0	0	0	0					1	1	0	0	0	0		0	0	0	0	0	0	0
Acer campestre_ t.																						0	0	0	0	0	0		0	0	0	0	0	0	0
Alnus	Alnus	1	0	1	0	0	0	0	0	0	0	1	0	0	0	0	0					1	1	1	1	0	0		0	0	0	0	0	0	0
Artemisia	Artemisia	0	0	0	0	0	0	0	0	0	1	0	0	0	0	0	0					0	0	0	0	1	0		0	0	0	0	0	0	0
Betula	Betula	1	0	1	0	0	0	0	0	0	0	0	0	0	0	0	0					1	1	0	1	0	0		0	0	0	0	0	0	0
Buxus	Buxus	0	0	0	0	0	0	0	0	0	0	0	0	0	0	1	0					0	1	1	0	0	0		0	0	0	0	0	0	0
Carpinus betulus	Carpinus	0	0	0	0	0	0	0	0	0	0	0	1	0	0	0	0					1	1	1	0	0	0		0	0	0	0	0	0	0
Caryophyllaceae	Caryophyllaceae	0	0	0	0	0	0	0	0	0	1	0	0	0	0	0	0					0	0	0	0	1	0		0	0	0	0	0	0	0
Castanea																						0	0	0	0	0	0		0	0	0	0	0	0	0
Centaurea _undiff.	Centaurea	0	0	0	0	0	0	0	0	0	1	0	0	0	0	0	0					0	0	0	0	1	0		0	0	0	0	0	0	0
Cerealia																						0	0	0	0	0	0		0	0	0	0	0	0	0
Chenopodiaceae	Chenopodiaceae	0	0	0	0	0	0	0	0	0	1	0	0	0	0	0	0					0	0	0	0	1	0		0	0	0	0	0	0	0
Compositae Liguliflorae																						0	0	0	0	0	0		0	0	0	0	0	0	0
Compositae Tubuliflorae																						0	0	0	0	0	0		0	0	0	0	0	0	0
Corylus	Corylus	0	0	0	0	0	0	0	0	0	0	0	1	0	0	0	0					1	1	1	0	0	0		0	0	0	0	0	0	0
Cruciferae																						0	0	0	0	0	0		0	0	0	0	0	0	0
Cyperaceae																						0	0	0	0	0	0		0	0	0	0	0	0	0
Ephedra distachya_ t.	Ephedra	0	0	0	0	0	1	0	0	0	0	0	0	0	0	0	0					0	0	0	0	0	1		0	0	0	0	0	0	0
Ephedra fragilis_ t.	Ephedra fragilis	0	0	0	0	0	0	0	0	0	1	0	0	0	0	0	0					0	0	0	0	1	0		0	0	0	0	0	0	0
Ericaceae	Ericaceae	0	0	0	0	0	0	0	0	1	0	0	0	0	0	0	0					1	1	1	1	0	0		0	0	0	0	0	0	0
Fagus	Fagus	0	0	0	0	0	0	0	0	0	0	0	1	0	0	0	0					1	1	1	0	0	0		0	0	0	0	0	0	0
Filipendula																						0	0	0	0	0	0		0	0	0	0	0	0	0
Fraxinus excelsior	Fraxinus excelsior	0	0	0	0	0	0	0	0	0	0	1	0	0	0	0	0					0	1	1	0	0	0		0	0	0	0	0	0	0
Fraxinus ornus																						0	0	0	0	0	0		0	0	0	0	0	0	0
Hedera helix	Hedera	0	0	0	0	0	0	0	0	0	0	0	0	0	0	1	0					0	1	1	0	0	0		0	0	0	0	0	0	0
Juniperus	Juniperus	0	0	0	0	0	0	1	0	0	0	0	0	0	0	0	0					1	1	1	0	1	0		0	0	0	0	0	0	0
Labiatae (Lamiaceae)																						0	0	0	0	0	0		0	0	0	0	0	0	0
Mentha_t.																						0	0	0	0	0	0		0	0	0	0	0	0	0
Olea	Olea	0	0	0	0	0	0	0	0	0	0	0	0	0	0	0	1					0	0	0	0	1	0		0	0	0	0	0	0	0
Ostrya carp./Carninus orient.	Ostrya	0	0	0	0	0	0	0	0	0	0	0	0	1	0	0	0					0	1	1	0	0	0		0	0	0	0	0	0	0
Phillyrea	Phillyrea	0	0	0	0	0	0	0	0	0	0	0	0	0	0	0	1					0	0	0	0	1	0		0	0	0	0	0	0	0
Pinus																						0	0	0	0	0	0		0	0	0	0	0	0	0
Pistacia	Pistacea	0	0	0	0	0	0	0	0	0	0	0	0	0	0	0	1					0	0	0	0	1	0		0	0	0	0	0	0	0
Plantago	Plantago	0	0	0	0	0	0	0	0	0	1	0	0	0	0	0	0					0	0	0	0	1	0		0	0	0	0	0	0	0
Platanus																						0	0	0	0	0	0		0	0	0	0	0	0	0
Polygonum persicaria	Polygonum	0	0	0	0	0	0	0	0	0	1	0	0	0	0	0	0					0	0	0	0	1	0		0	0	0	0	0	0	0
Quercus_ (deciduous)	Quercus (deciduous)	0	0	0	0	0	0	0	0	0	0	1	0	0	0	0	0					0	1	1	0	0	0		0	0	0	0	0	0	0
Quercus_ (evergreen)	Quercus (evergreen)	0	0	0	0	0	0	0	0	0	0	0	0	0	1	0	0					0	0	1	0	1	0		0	0	0	0	0	0	0
Ranunculaceae																						0	0	0	0	0	0		0	0	0	0	0	0	0
Ranunculus_-t.																						0	0	0	0	0	0		0	0	0	0	0	0	0
Rosaceae	Rosaceae	0	0	0	0	0	0	0	0	0	1	0	0	0	0	0	0					0	0	0	0	1	0		0	0	0	0	0	0	0
Rubiaceae	Rubiaceae	0	0	0	0	0	0	0	0	0	1	0	0	0	0	0	0					0	0	0	0	1	0		0	0	0	0	0	0	0
Rumex	Rumex	0	0	0	0	0	0	0	0	0	1	0	0	0	0	0	0					0	0	0	0	1	0		0	0	0	0	0	0	0
Salix	Salix	1	0	1	0	0	0	0	0	0	0	1	0	0	0	0	0					1	1	1	1	0	0		0	0	0	0	0	0	0
Sanguisorba minor_-t.	Sanguisorba	0	0	0	0	0	0	0	0	0	1	0	0	0	0	0	0					0	0	0	0	1	0		0	0	0	0	0	0	0
Saxifragaceae	Saxifrage	1	0	0	0	0	0	0	0	0	0	0	0	0	0	0	0					0	0	0	1	0	0		0	0	0	0	0	0	0
Thalictrum	Thalictrum	0	0	0	0	0	0	0	0	0	1	0	0	0	0	0	0					0	0	0	0	1	0		0	0	0	0	0	0	0
Tilia	Tilia	0	0	0	0	0	0	0	0	0	0	0	1	0	0	0	0					1	1	1	0	0	0		0	0	0	0	0	0	0
Ulmus	Ulmus	0	0	0	0	0	0	0	0	0	0	0	1	0	0	0	0					1	1	1	0	0	0		0	0	0	0	0	0	0
Umbelliferae																						0	0	0	0	0	0		0	0	0	0	0	0	0
Zelkova																						0	0	0	0	0	0		0	0	0	0	0	0	0
																														0	0	0	0	0	0

## Sheet: TP
		Arctic/alpine dwarf shrub	Boreal evergreen conifer	Boreal summergreen	Cool-temperate conifer	Intermediate-temperate conifer	Desert forb/shrub	Eurythermic conifer	Grass	Heath	Steppe forb/shrub	Temperate summergreen	Cool-temperate summergreen	Warm-temperate summergreen	Warm-temperate broadleaved evergreen	Cool-temperate broadleaf evergreen	Warm-temperate sclerophyll shrub				MEGABIOMES								MEGABIOMES
		aa	bec	bs	ctc	ctc1	df	ec	g	h	sf	ts	ts1	ts2	wte	wte1	wte2					boreal forest	temperate forest	warm-temperate forest	tundra	grassland and dry shrubland	desert		sqrt	boreal forest	temperate forest	warm-temperate forest	tundra	grassland and dry shrubland	desert
ABIES	Abies	0	1	0	1	0	0	0	0	0	0	0	0	0	0	0	0					1	1	0	0	0	0		0	0.835712	0.835712	0	0	0	0
ACER																						0	0	0	0	0	0		0	0	0	0	0	0	0
ALNUS	Alnus	1	0	1	0	0	0	0	0	0	0	1	0	0	0	0	0					1	1	1	1	0	0		0	0.590937	0.590937	0.590937	0.590937	0	0
ARTEMISIA	Artemisia	0	0	0	0	0	0	0	0	0	1	0	0	0	0	0	0					0	0	0	0	1	0		0	0	0	0	0	0.835712	0
ASTERACEAE.LIG.	Asteraceae	0	0	0	0	0	0	0	0	0	1	0	0	0	0	0	0					0	0	0	0	1	0		0	0	0	0	0	0	0
ASTERACEAE.TUB.	Asteraceae	0	0	0	0	0	0	0	0	0	1	0	0	0	0	0	0					0	0	0	0	1	0		0	0	0	0	0	0	0
AZOLLA																						0	0	0	0	0	0		0	0	0	0	0	0	0
BETULA	Betula	1	0	1	0	0	0	0	0	0	0	0	0	0	0	0	0					1	1	0	1	0	0		0	0	0	0	0	0	0
Boraginaceae																						0	0	0	0	0	0		0	0	0	0	0	0	0
BRASSICACEAE	Brassicaceae	0	0	0	0	0	0	0	0	0	1	0	0	0	0	0	0					0	0	0	0	1	0		0	0	0	0	0	0.590937	0
BUXUS	Buxus	0	0	0	0	0	0	0	0	0	0	0	0	0	0	1	0					0	1	1	0	0	0		0	0	0	0	0	0	0
Campanulaceae	Campanulaceae	0	0	0	0	0	0	0	0	0	1	0	0	0	0	0	0					0	0	0	0	1	0		0	0	0	0	0	0	0
CARPINUS	Carpinus	0	0	0	0	0	0	0	0	0	0	0	1	0	0	0	0					1	1	1	0	0	0		0	2.36375	2.36375	2.36375	0	0	0
CARYA																						0	0	0	0	0	0		0	0	0	0	0	0	0
CARYOPHYLLACEAE	Caryophyllaceae	0	0	0	0	0	0	0	0	0	1	0	0	0	0	0	0					0	0	0	0	1	0		0	0	0	0	0	0	0
CASTANEA																						0	0	0	0	0	0		0	0	0	0	0	0	0
CEDRUS	Cedrus	0	0	0	0	1	0	0	0	0	0	0	0	0	0	0	0					1	1	0	0	0	0		0	0	0	0	0	0	0
Celtis																						0	0	0	0	0	0		0	0	0	0	0	0	0
CENTAUREA.CYAN.	Centaurea	0	0	0	0	0	0	0	0	0	1	0	0	0	0	0	0					0	0	0	0	1	0		0	0	0	0	0	0	0
CENTAUREA.SOL.	Centaurea	0	0	0	0	0	0	0	0	0	1	0	0	0	0	0	0					0	0	0	0	1	0		0	0	0	0	0	0	0
CHENOPODIACEAE	Chenopodiaceae	0	0	0	0	0	0	0	0	0	1	0	0	0	0	0	0					0	0	0	0	1	0		0	0	0	0	0	1.18187	0
CISTACEAE																						0	0	0	0	0	0		0	0	0	0	0	0	0
CLADIUM																						0	0	0	0	0	0		0	0	0	0	0	0	0
CORNUS																						0	0	0	0	0	0		0	0	0	0	0	0	0
CORYLUS	Corylus	0	0	0	0	0	0	0	0	0	0	0	1	0	0	0	0					1	1	1	0	0	0		0	0	0	0	0	0	0
CYPERACEAE																						0	0	0	0	0	0		0	0	0	0	0	0	0
DAPHNE																						0	0	0	0	0	0		0	0	0	0	0	0	0
Dipsacaceae	Dipsacaceae	0	0	0	0	0	0	0	0	0	1	0	0	0	0	0	0					0	0	0	0	1	0		0	0	0	0	0	0	0
EPHEDRA	Ephedra	0	0	0	0	0	1	0	0	0	0	0	0	0	0	0	0					0	0	0	0	0	1		0	0	0	0	0	0	0
EQUISETUM																						0	0	0	0	0	0		0	0	0	0	0	0	0
ERICACEAE	Ericaceae	0	0	0	0	0	0	0	0	1	0	0	0	0	0	0	0					1	1	1	1	0	0		0	1.86871	1.86871	1.86871	1.86871	0	0
Eucommia																						0	0	0	0	0	0		0	0	0	0	0	0	0
FAGUS	Fagus	0	0	0	0	0	0	0	0	0	0	0	1	0	0	0	0					1	1	1	0	0	0		0	0	0	0	0	0	0
GALIUM																						0	0	0	0	0	0		0	0	0	0	0	0	0
HEDERA	Hedera	0	0	0	0	0	0	0	0	0	0	0	0	0	0	1	0					0	1	1	0	0	0		0	0	0	0	0	0	0
ILEX	Ilex	0	0	0	0	0	0	0	0	0	0	0	0	0	0	1	0					0	1	1	0	0	0		0	0	0	0	0	0	0
Juglans																						0	0	0	0	0	0		0	0	0	0	0	0	0
JUNIPERUS	Juniperus	0	0	0	0	0	0	1	0	0	0	0	0	0	0	0	0					1	1	1	0	1	0		0	1.4475	1.4475	1.4475	0	1.4475	0
LIQUIDAMBAR																						0	0	0	0	0	0		0	0	0	0	0	0	0
Liriodendron																						0	0	0	0	0	0		0	0	0	0	0	0	0
LYTHRACEAE																						0	0	0	0	0	0		0	0	0	0	0	0	0
MENYANTHES																						0	0	0	0	0	0		0	0	0	0	0	0	0
MYRIOPHYLLUM																						0	0	0	0	0	0		0	0	0	0	0	0	0
NUPHAR																						0	0	0	0	0	0		0	0	0	0	0	0	0
NYMPHAEA																						0	0	0	0	0	0		0	0	0	0	0	0	0
OLEA/FRAXINUS	Olea	0	0	0	0	0	0	0	0	0	0	0	0	0	0	0	1					0	0	0	0	1	0		0	0	0	0	0	1.02353	0
OSTRYA	Ostrya	0	0	0	0	0	0	0	0	0	0	0	0	1	0	0	0					0	1	1	0	0	0		0	0	0.590937	0.590937	0	0	0
Parottia																						0	0	0	0	0	0		0	0	0	0	0	0	0
Parthenocissus																						0	0	0	0	0	0		0	0	0	0	0	0	0
PEDIASTRUM																						0	0	0	0	0	0		0	0	0	0	0	0	0
PHILLYREA	Phillyrea	0	0	0	0	0	0	0	0	0	0	0	0	0	0	0	1					0	0	0	0	1	0		0	0	0	0	0	0	0
PICEA	Picea	0	1	0	0	0	0	0	0	0	0	0	0	0	0	0	0					1	1	0	0	0	0		0	0	0	0	0	0	0
PINUS																						0	0	0	0	0	0		0	0	0	0	0	0	0
PISTACIA	Pistacea	0	0	0	0	0	0	0	0	0	0	0	0	0	0	0	1					0	0	0	0	1	0		0	0	0	0	0	0	0
PLANTAGO	Plantago	0	0	0	0	0	0	0	0	0	1	0	0	0	0	0	0					0	0	0	0	1	0		0	0	0	0	0	0	0
Platanus																						0	0	0	0	0	0		0	0	0	0	0	0	0
POACEAE	Poaceae	0	0	0	0	0	0	0	1	0	0	0	0	0	0	0	0					0	0	0	1	1	0		0	0	0	0	2.4365	2.4365	0
POLYGONUM AVIC	Polygonum	0	0	0	0	0	0	0	0	0	1	0	0	0	0	0	0					0	0	0	0	1	0		0	0	0	0	0	0	0
POLYGONUM.VIV.	Polygonum	0	0	0	0	0	0	0	0	0	1	0	0	0	0	0	0					0	0	0	0	1	0		0	0	0	0	0	0	0
POPULUS	Populus	0	0	0	0	0	0	0	0	0	0	1	0	0	0	0	0					0	1	1	0	0	0		0	0	0	0	0	0	0
POTAMOGETON																						0	0	0	0	0	0		0	0	0	0	0	0	0
POTERIUM																						0	0	0	0	0	0		0	0	0	0	0	0	0
PRIMULACEAE																						0	0	0	0	0	0		0	0	0	0	0	0	0
PSAMMOGROSTIS																						0	0	0	0	0	0		0	0	0	0	0	0	0
Pteridium																						0	0	0	0	0	0		0	0	0	0	0	0	0
PTEROCARYA																						0	0	0	0	0	0		0	0	0	0	0	0	0
QUERCUS	Quercus (deciduous)	0	0	0	0	0	0	0	0	0	0	1	0	0	0	0	0					0	1	1	0	0	0		0	0	7.35711	7.35711	0	0	0
RANUNCULACEAE																						0	0	0	0	0	0		0	0	0	0	0	0	0
RHAMNACEAE																						0	0	0	0	0	0		0	0	0	0	0	0	0
RHUS																						0	0	0	0	0	0		0	0	0	0	0	0	0
Rosaceae	Rosaceae	0	0	0	0	0	0	0	0	0	1	0	0	0	0	0	0					0	0	0	0	1	0		0	0	0	0	0	0	0
Rumex	Rumex	0	0	0	0	0	0	0	0	0	1	0	0	0	0	0	0					0	0	0	0	1	0		0	0	0	0	0	0	0
SALIX	Salix	1	0	1	0	0	0	0	0	0	0	1	0	0	0	0	0					1	1	1	1	0	0		0	0	0	0	0	0	0
SANGUISORBA MINOR	Sanguisorba	0	0	0	0	0	0	0	0	0	1	0	0	0	0	0	0					0	0	0	0	1	0		0	0	0	0	0	0	0
STRATIOTES																						0	0	0	0	0	0		0	0	0	0	0	0	0
Tamarisk																						0	0	0	0	0	0		0	0	0	0	0	0	0
TAXUS																						0	0	0	0	0	0		0	0	0	0	0	0	0
THALICTRUM	Thalictrum	0	0	0	0	0	0	0	0	0	1	0	0	0	0	0	0					0	0	0	0	1	0		0	0	0	0	0	0	0
TILIA	Tilia	0	0	0	0	0	0	0	0	0	0	0	1	0	0	0	0					1	1	1	0	0	0		0	0	0	0	0	0	0
TRAPA																						0	0	0	0	0	0		0	0	0	0	0	0	0
Tsuga																						0	0	0	0	0	0		0	0	0	0	0	0	0
TYPHACEAE																						0	0	0	0	0	0		0	0	0	0	0	0	0
ULMUS	Ulmus	0	0	0	0	0	0	0	0	0	0	0	1	0	0	0	0					1	1	1	0	0	0		0	1.32138	1.32138	1.32138	0	0	0
UMBELLIFEAE																						0	0	0	0	0	0		0	0	0	0	0	0	0
VALERIANACEAE																						0	0	0	0	0	0		0	0	0	0	0	0	0
Viscum																						0	0	0	0	0	0		0	0	0	0	0	0	0
VITIS																						0	0	0	0	0	0		0	0	0	0	0	0	0
XANTHIUM																						0	0	0	0	0	0		0	0	0	0	0	0	0
ZELKOVA																						0	0	0	0	0	0		0	0	0	0	0	0	0
																														8.42798	16.376	15.5403	4.89614	7.51605	0

## Sheet: Lagaccione
		Arctic/alpine dwarf shrub	Boreal evergreen conifer	Boreal summergreen	Cool-temperate conifer	Intermediate-temperate conifer	Desert forb/shrub	Eurythermic conifer	Grass	Heath	Steppe forb/shrub	Temperate summergreen	Cool-temperate summergreen	Warm-temperate summergreen	Warm-temperate broadleaved evergreen	Cool-temperate broadleaf evergreen	Warm-temperate sclerophyll shrub				MEGABIOMES								MEGABIOMES
		aa	bec	bs	ctc	ctc1	df	ec	g	h	sf	ts	ts1	ts2	wte	wte1	wte2					boreal forest	temperate forest	warm-temperate forest	tundra	grassland and dry shrubland	desert		sqrt	boreal forest	temperate forest	warm-temperate forest	tundra	grassland and dry shrubland	desert
ABIES	Abies	0	1	0	1	0	0	0	0	0	0	0	0	0	0	0	0					1	1	0	0	0	0		0	0	0	0	0	0	0
ACER																						0	0	0	0	0	0		0	0	0	0	0	0	0
ALISMA																						0	0	0	0	0	0		0	0	0	0	0	0	0
ALNUS																						0	0	0	0	0	0		0	0	0	0	0	0	0
ARBUTUS																						0	0	0	0	0	0		0	0	0	0	0	0	0
ARMERIA	Armeria	0	0	0	0	0	0	0	0	0	1	0	0	0	0	0	0					0	0	0	0	1	0		0	0	0	0	0	0	0
ARTEMISIA	Artemisia	0	0	0	0	0	0	0	0	0	1	0	0	0	0	0	0					0	0	0	0	1	0		0	0	0	0	0	0	0
ASTEROIDEAE	Asteraceae	0	0	0	0	0	0	0	0	0	1	0	0	0	0	0	0					0	0	0	0	1	0		0	0	0	0	0	0	0
BETULA	Betula	1	0	1	0	0	0	0	0	0	0	0	0	0	0	0	0					1	1	0	1	0	0		0	0	0	0	0	0	0
BORAGINACEAE																						0	0	0	0	0	0		0	0	0	0	0	0	0
BOTRYOCOCCACEAE																						0	0	0	0	0	0		0	0	0	0	0	0	0
BUXUS	Buxus	0	0	0	0	0	0	0	0	0	0	0	0	0	0	1	0					0	1	1	0	0	0		0	0	0	0	0	0	0
CALLIGONUM type																						0	0	0	0	0	0		0	0	0	0	0	0	0
CALLUNA	Calluna	0	0	0	0	0	0	0	0	1	0	0	0	0	0	0	0					1	1	1	1	0	0		0	0	0	0	0	0	0
CAMPANULACEAE	Campanulaceae	0	0	0	0	0	0	0	0	0	1	0	0	0	0	0	0					0	0	0	0	1	0		0	0	0	0	0	0	0
CANNABACEAE																						0	0	0	0	0	0		0	0	0	0	0	0	0
CARPINUS BETULUS	Carpinus	0	0	0	0	0	0	0	0	0	0	0	1	0	0	0	0					1	1	1	0	0	0		0	0	0	0	0	0	0
CARYOPHYLLACEAE	Caryophyllaceae	0	0	0	0	0	0	0	0	0	1	0	0	0	0	0	0					0	0	0	0	1	0		0	0	0	0	0	0	0
CASTANEA																						0	0	0	0	0	0		0	0	0	0	0	0	0
CEDRUS	Cedrus	0	0	0	0	1	0	0	0	0	0	0	0	0	0	0	0					1	1	0	0	0	0		0	0	0	0	0	0	0
CENTAUREA	Centaurea	0	0	0	0	0	0	0	0	0	1	0	0	0	0	0	0					0	0	0	0	1	0		0	0	0	0	0	0	0
cereals																						0	0	0	0	0	0		0	0	0	0	0	0	0
CHENOPODIACEAE	Chenopodiaceae	0	0	0	0	0	0	0	0	0	1	0	0	0	0	0	0					0	0	0	0	1	0		0	0	0	0	0	0	0
CICHORIOIDEAE																						0	0	0	0	0	0		0	0	0	0	0	0	0
CISTUS																						0	0	0	0	0	0		0	0	0	0	0	0	0
CONVOLVULACEAE																						0	0	0	0	0	0		0	0	0	0	0	0	0
CORYLUS	Corylus	0	0	0	0	0	0	0	0	0	0	0	1	0	0	0	0					1	1	1	0	0	0		0	0	0	0	0	0	0
CRUCIFERAE																						0	0	0	0	0	0		0	0	0	0	0	0	0
CYPERACEAE																						0	0	0	0	0	0		0	0	0	0	0	0	0
DIPSACACEAE	Dipsacaceae	0	0	0	0	0	0	0	0	0	1	0	0	0	0	0	0					0	0	0	0	1	0		0	0	0	0	0	0	0
EPHEDRA DISTACHYA t.	Ephedra	0	0	0	0	0	1	0	0	0	0	0	0	0	0	0	0					0	0	0	0	0	1		0	0	0	0	0	0	0
EPHEDRA FRAGILIS t.	Ephedra fragilis	0	0	0	0	0	0	0	0	0	1	0	0	0	0	0	0					0	0	0	0	1	0		0	0	0	0	0	0	0
EPILOBIUM																						0	0	0	0	0	0		0	0	0	0	0	0	0
ERICACEAE	Ericaceae	0	0	0	0	0	0	0	0	1	0	0	0	0	0	0	0					1	1	1	1	0	0		0	0	0	0	0	0	0
EUPHORBIA																						0	0	0	0	0	0		0	0	0	0	0	0	0
FAGUS	Fagus	0	0	0	0	0	0	0	0	0	0	0	1	0	0	0	0					1	1	1	0	0	0		0	0	0	0	0	0	0
FILIPENDULA																						0	0	0	0	0	0		0	0	0	0	0	0	0
FRAXINUS/PHILLYREA	Phillyrea	0	0	0	0	0	0	0	0	0	0	0	0	0	0	0	1					0	0	0	0	1	0		0	0	0	0	0	0	0
GRAMINEAE	Poaceae	0	0	0	0	0	0	0	1	0	0	0	0	0	0	0	0					0	0	0	1	1	0		0	0	0	0	0	0	0
HEDERA	Hedera	0	0	0	0	0	0	0	0	0	0	0	0	0	0	1	0					0	1	1	0	0	0		0	0	0	0	0	0	0
HELIANTHEMUM	Helianthemum	0	0	0	0	0	0	0	0	0	1	0	0	0	0	0	0					0	0	0	0	1	0		0	0	0	0	0	0	0
HIPPOPHAE	Hippophae	0	0	0	0	0	0	0	0	0	1	0	0	0	0	0	0					0	0	0	0	1	0		0	0	0	0	0	0	0
ILEX	Ilex	0	0	0	0	0	0	0	0	0	0	0	0	0	0	1	0					0	1	1	0	0	0		0	0	0	0	0	0	0
Indeterminable																						0	0	0	0	0	0		0	0	0	0	0	0	0
JUNIPERUS type	Juniperus	0	0	0	0	0	0	1	0	0	0	0	0	0	0	0	0					1	1	1	0	1	0		0	0	0	0	0	0	0
LABIATAE																						0	0	0	0	0	0		0	0	0	0	0	0	0
LEGUMINOSAE																						0	0	0	0	0	0		0	0	0	0	0	0	0
LILIACEAE																						0	0	0	0	0	0		0	0	0	0	0	0	0
LYTHRACEAE																						0	0	0	0	0	0		0	0	0	0	0	0	0
MALVACEAE																						0	0	0	0	0	0		0	0	0	0	0	0	0
Monolete spores																						0	0	0	0	0	0		0	0	0	0	0	0	0
MYRIOPHYLLUM ALTERNIFL.																						0	0	0	0	0	0		0	0	0	0	0	0	0
MYRIOPHYLLUM SPICATUM																						0	0	0	0	0	0		0	0	0	0	0	0	0
NUPHAR																						0	0	0	0	0	0		0	0	0	0	0	0	0
NYMPHAEACEAE																						0	0	0	0	0	0		0	0	0	0	0	0	0
OLEA	Olea	0	0	0	0	0	0	0	0	0	0	0	0	0	0	0	1					0	0	0	0	1	0		0	0	0	0	0	0	0
OSMUNDA																						0	0	0	0	0	0		0	0	0	0	0	0	0
OSTRYA/CARPINUS OR.	Ostrya	0	0	0	0	0	0	0	0	0	0	0	0	1	0	0	0					0	1	1	0	0	0		0	0	0	0	0	0	0
PEDIASTRUM																						0	0	0	0	0	0		0	0	0	0	0	0	0
PICEA	Picea	0	1	0	0	0	0	0	0	0	0	0	0	0	0	0	0					1	1	0	0	0	0		0	0	0	0	0	0	0
PINUS																						0	0	0	0	0	0		0	0	0	0	0	0	0
PISTACIA	Pistacea	0	0	0	0	0	0	0	0	0	0	0	0	0	0	0	1					0	0	0	0	1	0		0	0	0	0	0	0	0
PLANTAGO	Plantago	0	0	0	0	0	0	0	0	0	1	0	0	0	0	0	0					0	0	0	0	1	0		0	0	0	0	0	0	0
POLYGONUM AMPHIBIUM	Polygonum	0	0	0	0	0	0	0	0	0	1	0	0	0	0	0	0					0	0	0	0	1	0		0	0	0	0	0	0	0
POLYGONUM BISTORTA type	Polygonum	0	0	0	0	0	0	0	0	0	1	0	0	0	0	0	0					0	0	0	0	1	0		0	0	0	0	0	0	0
POLYPODIUM																						0	0	0	0	0	0		0	0	0	0	0	0	0
POPULUS	Populus	0	0	0	0	0	0	0	0	0	0	1	0	0	0	0	0					0	1	1	0	0	0		0	0	0	0	0	0	0
POTAMOGETON																						0	0	0	0	0	0		0	0	0	0	0	0	0
POTERIUM																						0	0	0	0	0	0		0	0	0	0	0	0	0
PSEUDOSCHIZAEA																						0	0	0	0	0	0		0	0	0	0	0	0	0
QUERCUS deciduous	Quercus (deciduous)	0	0	0	0	0	0	0	0	0	0	1	0	0	0	0	0					0	1	1	0	0	0		0	0	0	0	0	0	0
QUERCUS evergreen	Quercus (evergreen)	0	0	0	0	0	0	0	0	0	0	0	0	0	1	0	0					0	0	1	0	1	0		0	0	0	0	0	0	0
RANUNCULACEAE																						0	0	0	0	0	0		0	0	0	0	0	0	0
RHAMNUS																						0	0	0	0	0	0		0	0	0	0	0	0	0
ROSACEAE	Rosaceae	0	0	0	0	0	0	0	0	0	1	0	0	0	0	0	0					0	0	0	0	1	0		0	0	0	0	0	0	0
RUBIACEAE	Rubiaceae	0	0	0	0	0	0	0	0	0	1	0	0	0	0	0	0					0	0	0	0	1	0		0	0	0	0	0	0	0
RUMEX	Rumex	0	0	0	0	0	0	0	0	0	1	0	0	0	0	0	0					0	0	0	0	1	0		0	0	0	0	0	0	0
SALIX	Salix	1	0	1	0	0	0	0	0	0	0	1	0	0	0	0	0					1	1	1	1	0	0		0	0	0	0	0	0	0
SAMBUCUS/VIBURNUM																						0	0	0	0	0	0		0	0	0	0	0	0	0
SPARGANIUM																						0	0	0	0	0	0		0	0	0	0	0	0	0
SPHAGNUM																						0	0	0	0	0	0		0	0	0	0	0	0	0
THALICTRUM	Thalictrum	0	0	0	0	0	0	0	0	0	1	0	0	0	0	0	0					0	0	0	0	1	0		0	0	0	0	0	0	0
TILIA	Tilia	0	0	0	0	0	0	0	0	0	0	0	1	0	0	0	0					1	1	1	0	0	0		0	0	0	0	0	0	0
Trilete spores																						0	0	0	0	0	0		0	0	0	0	0	0	0
TYPHA																						0	0	0	0	0	0		0	0	0	0	0	0	0
ULMUS	Ulmus	0	0	0	0	0	0	0	0	0	0	0	1	0	0	0	0					1	1	1	0	0	0		0	0	0	0	0	0	0
UMBELLIFERAE																						0	0	0	0	0	0		0	0	0	0	0	0	0
URTICACEAE																						0	0	0	0	0	0		0	0	0	0	0	0	0
UTRICULARIA																						0	0	0	0	0	0		0	0	0	0	0	0	0
VALERIANACEAE																						0	0	0	0	0	0		0	0	0	0	0	0	0
VISCUM																						0	0	0	0	0	0		0	0	0	0	0	0	0
VITIS																						0	0	0	0	0	0		0	0	0	0	0	0	0
ZELKOVA																						0	0	0	0	0	0		0	0	0	0	0	0	0
																														0	0	0	0	0	0

## Sheet: Lago di Vico
		Arctic/alpine dwarf shrub	Boreal evergreen conifer	Boreal summergreen	Cool-temperate conifer	Intermediate-temperate conifer	Desert forb/shrub	Eurythermic conifer	Grass	Heath	Steppe forb/shrub	Temperate summergreen	Cool-temperate summergreen	Warm-temperate summergreen	Warm-temperate broadleaved evergreen	Cool-temperate broadleaf evergreen	Warm-temperate sclerophyll shrub				MEGABIOMES								MEGABIOMES
		aa	bec	bs	ctc	ctc1	df	ec	g	h	sf	ts	ts1	ts2	wte	wte1	wte2					boreal forest	temperate forest	warm-temperate forest	tundra	grassland and dry shrubland	desert		sqrt	boreal forest	temperate forest	warm-temperate forest	tundra	grassland and dry shrubland	desert
ABIES	Abies	0	1	0	1	0	0	0	0	0	0	0	0	0	0	0	0					1	1	0	0	0	0		0	0	0	0	0	0	0
ACER																						0	0	0	0	0	0		0	0	0	0	0	0	0
ALISMA																						0	0	0	0	0	0		0	0	0	0	0	0	0
ALNUS	Alnus	1	0	1	0	0	0	0	0	0	0	1	0	0	0	0	0					1	1	1	1	0	0		0	0	0	0	0	0	0
ARMERIA	Armeria	0	0	0	0	0	0	0	0	0	1	0	0	0	0	0	0					0	0	0	0	1	0		0	0	0	0	0	0	0
ARTEMISIA	Artemisia	0	0	0	0	0	0	0	0	0	1	0	0	0	0	0	0					0	0	0	0	1	0		0	0	0	0	0	0	0
ASTEROIDEAE	Asteraceae	0	0	0	0	0	0	0	0	0	1	0	0	0	0	0	0					0	0	0	0	1	0		0	0	0	0	0	0	0
BETULA	Betula	1	0	1	0	0	0	0	0	0	0	0	0	0	0	0	0					1	1	0	1	0	0		0	0	0	0	0	0	0
BORAGINACEAE																						0	0	0	0	0	0		0	0	0	0	0	0	0
BOTRYOCOCCACEAE																						0	0	0	0	0	0		0	0	0	0	0	0	0
BUXUS	Buxus	0	0	0	0	0	0	0	0	0	0	0	0	0	0	1	0					0	1	1	0	0	0		0	0	0	0	0	0	0
CALLIGONUM																						0	0	0	0	0	0		0	0	0	0	0	0	0
CAMPANULACEAE	Campanulaceae	0	0	0	0	0	0	0	0	0	1	0	0	0	0	0	0					0	0	0	0	1	0		0	0	0	0	0	0	0
CANNABACEAE																						0	0	0	0	0	0		0	0	0	0	0	0	0
CARPINUS BETULUS	Carpinus	0	0	0	0	0	0	0	0	0	0	0	1	0	0	0	0					1	1	1	0	0	0		0	0	0	0	0	0	0
CARYOPHYLLACEAE	Caryophyllaceae	0	0	0	0	0	0	0	0	0	1	0	0	0	0	0	0					0	0	0	0	1	0		0	0	0	0	0	0	0
CASTANEA																						0	0	0	0	0	0		0	0	0	0	0	0	0
CEDRUS	Cedrus	0	0	0	0	1	0	0	0	0	0	0	0	0	0	0	0					1	1	0	0	0	0		0	0	0	0	0	0	0
CENTAUREA	Centaurea	0	0	0	0	0	0	0	0	0	1	0	0	0	0	0	0					0	0	0	0	1	0		0	0	0	0	0	0	0
cereal type																						0	0	0	0	0	0		0	0	0	0	0	0	0
CHENOPODIACEAE	Chenopodiaceae	0	0	0	0	0	0	0	0	0	1	0	0	0	0	0	0					0	0	0	0	1	0		0	0	0	0	0	0	0
CICHORIOIDEAE	Corylus	0	0	0	0	0	0	0	0	0	0	0	1	0	0	0	0					1	1	1	0	0	0		0	0	0	0	0	0	0
CORYLUS																						0	0	0	0	0	0		0	0	0	0	0	0	0
CRUCIFERAE																						0	0	0	0	0	0		0	0	0	0	0	0	0
CYPERACEAE																						0	0	0	0	0	0		0	0	0	0	0	0	0
DIPSACACEAE	Dipsacaceae	0	0	0	0	0	0	0	0	0	1	0	0	0	0	0	0					0	0	0	0	1	0		0	0	0	0	0	0	0
EPHEDRA DISTACHYA type	Ephedra	0	0	0	0	0	1	0	0	0	0	0	0	0	0	0	0					0	0	0	0	0	1		0	0	0	0	0	0	0
EPHEDRA FRAGILIS type	Ephedra fragilis	0	0	0	0	0	0	0	0	0	1	0	0	0	0	0	0					0	0	0	0	1	0		0	0	0	0	0	0	0
EPILOBIUM																						0	0	0	0	0	0		0	0	0	0	0	0	0
ERICACEAE	Ericaceae	0	0	0	0	0	0	0	0	1	0	0	0	0	0	0	0					1	1	1	1	0	0		0	0	0	0	0	0	0
EUPHORBIA																						0	0	0	0	0	0		0	0	0	0	0	0	0
FAGUS	Fagus	0	0	0	0	0	0	0	0	0	0	0	1	0	0	0	0					1	1	1	0	0	0		0	0	0	0	0	0	0
FILIPENDULA																						0	0	0	0	0	0		0	0	0	0	0	0	0
FRAXINUS/PHILLYREA	Phillyrea	0	0	0	0	0	0	0	0	0	0	0	0	0	0	0	1					0	0	0	0	1	0		0	0	0	0	0	0	0
GRAMINEAE	Poaceae	0	0	0	0	0	0	0	1	0	0	0	0	0	0	0	0					0	0	0	1	1	0		0	0	0	0	0	0	0
HEDERA	Hedera	0	0	0	0	0	0	0	0	0	0	0	0	0	0	1	0					0	1	1	0	0	0		0	0	0	0	0	0	0
HELIANTHEMUM	Helianthemum	0	0	0	0	0	0	0	0	0	1	0	0	0	0	0	0					0	0	0	0	1	0		0	0	0	0	0	0	0
HIPPOPHAE	Hippophae	0	0	0	0	0	0	0	0	0	1	0	0	0	0	0	0					0	0	0	0	1	0		0	0	0	0	0	0	0
ILEX	Ilex	0	0	0	0	0	0	0	0	0	0	0	0	0	0	1	0					0	1	1	0	0	0		0	0	0	0	0	0	0
INDETERMINABLE																						0	0	0	0	0	0		0	0	0	0	0	0	0
JUGLANS																						0	0	0	0	0	0		0	0	0	0	0	0	0
JUNIPERUS type	Juniperus	0	0	0	0	0	0	1	0	0	0	0	0	0	0	0	0					1	1	1	0	1	0		0	0	0	0	0	0	0
LABIATAE																						0	0	0	0	0	0		0	0	0	0	0	0	0
LEGUMINOSAE																						0	0	0	0	0	0		0	0	0	0	0	0	0
LILIACEAE																						0	0	0	0	0	0		0	0	0	0	0	0	0
LINUM																						0	0	0	0	0	0		0	0	0	0	0	0	0
LYGEUM																						0	0	0	0	0	0		0	0	0	0	0	0	0
LYTHRACEAE																						0	0	0	0	0	0		0	0	0	0	0	0	0
monolete spores																						0	0	0	0	0	0		0	0	0	0	0	0	0
MYRIOPHYLLUM SPICATUM																						0	0	0	0	0	0		0	0	0	0	0	0	0
NYMPHAEACEAE																						0	0	0	0	0	0		0	0	0	0	0	0	0
OLEA	Olea	0	0	0	0	0	0	0	0	0	0	0	0	0	0	0	1					0	0	0	0	1	0		0	0	0	0	0	0	0
OSTRYA/CARPINUS OR,	Ostrya	0	0	0	0	0	0	0	0	0	0	0	0	1	0	0	0					0	1	1	0	0	0		0	0	0	0	0	0	0
PEDIASTRUM																						0	0	0	0	0	0		0	0	0	0	0	0	0
PICEA	Picea	0	1	0	0	0	0	0	0	0	0	0	0	0	0	0	0					1	1	0	0	0	0		0	0	0	0	0	0	0
PINUS																						0	0	0	0	0	0		0	0	0	0	0	0	0
PISTACIA	Pistacea	0	0	0	0	0	0	0	0	0	0	0	0	0	0	0	1					0	0	0	0	1	0		0	0	0	0	0	0	0
PLANTAGO	Plantago	0	0	0	0	0	0	0	0	0	1	0	0	0	0	0	0					0	0	0	0	1	0		0	0	0	0	0	0	0
POLYGONUM	Polygonum	0	0	0	0	0	0	0	0	0	1	0	0	0	0	0	0					0	0	0	0	1	0		0	0	0	0	0	0	0
POLYPODIUM																						0	0	0	0	0	0		0	0	0	0	0	0	0
POPULUS	Populus	0	0	0	0	0	0	0	0	0	0	1	0	0	0	0	0					0	1	1	0	0	0		0	0	0	0	0	0	0
POTAMOGETON																						0	0	0	0	0	0		0	0	0	0	0	0	0
POTERIUM																						0	0	0	0	0	0		0	0	0	0	0	0	0
PSEUDOSCHIZAEA																						0	0	0	0	0	0		0	0	0	0	0	0	0
QUERCUS deciduous	Quercus (deciduous)	0	0	0	0	0	0	0	0	0	0	1	0	0	0	0	0					0	1	1	0	0	0		0	0	0	0	0	0	0
QUERCUS evergreen	Quercus (evergreen)	0	0	0	0	0	0	0	0	0	0	0	0	0	1	0	0					0	0	1	0	1	0		0	0	0	0	0	0	0
RANUNCULACEAE																						0	0	0	0	0	0		0	0	0	0	0	0	0
RHAMNUS																						0	0	0	0	0	0		0	0	0	0	0	0	0
ROSACEAE	Rosaceae	0	0	0	0	0	0	0	0	0	1	0	0	0	0	0	0					0	0	0	0	1	0		0	0	0	0	0	0	0
RUBIACEAE	Rubiaceae	0	0	0	0	0	0	0	0	0	1	0	0	0	0	0	0					0	0	0	0	1	0		0	0	0	0	0	0	0
RUMEX	Rumex	0	0	0	0	0	0	0	0	0	1	0	0	0	0	0	0					0	0	0	0	1	0		0	0	0	0	0	0	0
SALIX	Salix	1	0	1	0	0	0	0	0	0	0	1	0	0	0	0	0					1	1	1	1	0	0		0	0	0	0	0	0	0
SAMBUCUS/VIBURNUM																						0	0	0	0	0	0		0	0	0	0	0	0	0
SELAGINELLA																						0	0	0	0	0	0		0	0	0	0	0	0	0
SPARGANIUM/TYPHA																						0	0	0	0	0	0		0	0	0	0	0	0	0
SPHAGNUM																						0	0	0	0	0	0		0	0	0	0	0	0	0
THALICTRUM	Thalictrum	0	0	0	0	0	0	0	0	0	1	0	0	0	0	0	0					0	0	0	0	1	0		0	0	0	0	0	0	0
TILIA	Tilia	0	0	0	0	0	0	0	0	0	0	0	1	0	0	0	0					1	1	1	0	0	0		0	0	0	0	0	0	0
trilete spores																						0	0	0	0	0	0		0	0	0	0	0	0	0
ULMUS	Ulmus	0	0	0	0	0	0	0	0	0	0	0	1	0	0	0	0					1	1	1	0	0	0		0	0	0	0	0	0	0
UMBELLIFERAE																						0	0	0	0	0	0		0	0	0	0	0	0	0
URTICACEAE																						0	0	0	0	0	0		0	0	0	0	0	0	0
VALERIANACEAE																						0	0	0	0	0	0		0	0	0	0	0	0	0
VISCUM																						0	0	0	0	0	0		0	0	0	0	0	0	0
VITIS																						0	0	0	0	0	0		0	0	0	0	0	0	0
ZELKOVA																						0	0	0	0	0	0		0	0	0	0	0	0	0
																														0	0	0	0	0	0

## Sheet: Valle di Castiglione
		Arctic/alpine dwarf shrub	Boreal evergreen conifer	Boreal summergreen	Cool-temperate conifer	Intermediate-temperate conifer	Desert forb/shrub	Eurythermic conifer	Grass	Heath	Steppe forb/shrub	Temperate summergreen	Cool-temperate summergreen	Warm-temperate summergreen	Warm-temperate broadleaved evergreen	Cool-temperate broadleaf evergreen	Warm-temperate sclerophyll shrub				MEGABIOMES								MEGABIOMES
		aa	bec	bs	ctc	ctc1	df	ec	g	h	sf	ts	ts1	ts2	wte	wte1	wte2					boreal forest	temperate forest	warm-temperate forest	tundra	grassland and dry shrubland	desert		SQRT	boreal forest	temperate forest	warm-temperate forest	tundra	grassland and dry shrubland	desert
ABIES	Abies	0	1	0	1	0	0	0	0	0	0	0	0	0	0	0	0					1	1	0	0	0	0		0	0	0	0	0	0	0
ACER																						0	0	0	0	0	0		0	0	0	0	0	0	0
ALISMA																						0	0	0	0	0	0		0	0	0	0	0	0	0
ALNUS	Alnus	1	0	1	0	0	0	0	0	0	0	1	0	0	0	0	0					1	1	1	1	0	0		0	0	0	0	0	0	0
Altre acquatiche																						0	0	0	0	0	0		0	0	0	0	0	0	0
Altre AP																						0	0	0	0	0	0		0	0	0	0	0	0	0
Altre pteridofite																						0	0	0	0	0	0		0	0	0	0	0	0	0
ARTEMISIA	Artemisia	0	0	0	0	0	0	0	0	0	1	0	0	0	0	0	0					0	0	0	0	1	0		0	0	0	0	0	0	0
ASTEROIDEAE	Asteraceae	0	0	0	0	0	0	0	0	0	1	0	0	0	0	0	0					0	0	0	0	1	0		0	0	0	0	0	0	0
BETULA	Betula	1	0	1	0	0	0	0	0	0	0	0	0	0	0	0	0					1	1	0	1	0	0		0	0	0	0	0	0	0
BOTRYOCOCCACEAE																						0	0	0	0	0	0		0	0	0	0	0	0	0
BUXUS	Buxus	0	0	0	0	0	0	0	0	0	0	0	0	0	0	1	0					0	1	1	0	0	0		0	0	0	0	0	0	0
CAMPANULACEAE	Campanulaceae	0	0	0	0	0	0	0	0	0	1	0	0	0	0	0	0					0	0	0	0	1	0		0	0	0	0	0	0	0
CARPINUS BETULUS	Carpinus	0	0	0	0	0	0	0	0	0	0	0	1	0	0	0	0					1	1	1	0	0	0		0	0	0	0	0	0	0
CARPINUS OR./OSTRYA	Carpinus	0	0	0	0	0	0	0	0	0	0	0	1	0	0	0	0					1	1	1	0	0	0		0	0	0	0	0	0	0
CARYOPHYLLACEAE	Caryophyllaceae	0	0	0	0	0	0	0	0	0	1	0	0	0	0	0	0					0	0	0	0	1	0		0	0	0	0	0	0	0
CASTANEA																						0	0	0	0	0	0		0	0	0	0	0	0	0
CEDRUS	Cedrus	0	0	0	0	1	0	0	0	0	0	0	0	0	0	0	0					1	1	0	0	0	0		0	0	0	0	0	0	0
CHENOPODIACEAE	Chenopodiaceae	0	0	0	0	0	0	0	0	0	1	0	0	0	0	0	0					0	0	0	0	1	0		0	0	0	0	0	0	0
CICHORIOIDEAE																						0	0	0	0	0	0		0	0	0	0	0	0	0
CISTUS																						0	0	0	0	0	0		0	0	0	0	0	0	0
CORYLUS	Corylus	0	0	0	0	0	0	0	0	0	0	0	1	0	0	0	0					1	1	1	0	0	0		0	0	0	0	0	0	0
CRUCIFERAE																						0	0	0	0	0	0		0	0	0	0	0	0	0
CYPERACEAE																						0	0	0	0	0	0		0	0	0	0	0	0	0
DIPSACACEAE	Dipsacaceae	0	0	0	0	0	0	0	0	0	1	0	0	0	0	0	0					0	0	0	0	1	0		0	0	0	0	0	0	0
EPHEDRA DISTACHYA type	Ephedra	0	0	0	0	0	1	0	0	0	0	0	0	0	0	0	0					0	0	0	0	0	1		0	0	0	0	0	0	0
EPHEDRA FRAGILIS type	Ephedra fragilis	0	0	0	0	0	0	0	0	0	1	0	0	0	0	0	0					0	0	0	0	1	0		0	0	0	0	0	0	0
ERICACEAE	Ericaceae	0	0	0	0	0	0	0	0	1	0	0	0	0	0	0	0					1	1	1	1	0	0		0	0	0	0	0	0	0
EUPHORBIA																						0	0	0	0	0	0		0	0	0	0	0	0	0
FAGUS	Fagus	0	0	0	0	0	0	0	0	0	0	0	1	0	0	0	0					1	1	1	0	0	0		0	0	0	0	0	0	0
FILIPENDULA																						0	0	0	0	0	0		0	0	0	0	0	0	0
FRAXINUS																						0	0	0	0	0	0		0	0	0	0	0	0	0
GERANIUM																						0	0	0	0	0	0		0	0	0	0	0	0	0
GRAMINEAE	Poaceae	0	0	0	0	0	0	0	1	0	0	0	0	0	0	0	0					0	0	0	1	1	0		0	0	0	0	0	0	0
HEDERA	Hedera	0	0	0	0	0	0	0	0	0	0	0	0	0	0	1	0					0	1	1	0	0	0		0	0	0	0	0	0	0
HELIANTHEMUM	Helianthemum	0	0	0	0	0	0	0	0	0	1	0	0	0	0	0	0					0	0	0	0	1	0		0	0	0	0	0	0	0
ILEX	Ilex	0	0	0	0	0	0	0	0	0	0	0	0	0	0	1	0					0	1	1	0	0	0		0	0	0	0	0	0	0
INDETERMINABLE																						0	0	0	0	0	0		0	0	0	0	0	0	0
JUGLANS																						0	0	0	0	0	0		0	0	0	0	0	0	0
JUNIPERUS	Juniperus	0	0	0	0	0	0	1	0	0	0	0	0	0	0	0	0					1	1	1	0	1	0		0	0	0	0	0	0	0
LABIATAE																						0	0	0	0	0	0		0	0	0	0	0	0	0
LEGUMINOSAE																						0	0	0	0	0	0		0	0	0	0	0	0	0
LILIACEAE																						0	0	0	0	0	0		0	0	0	0	0	0	0
MALVACEAE																						0	0	0	0	0	0		0	0	0	0	0	0	0
monolete spores																						0	0	0	0	0	0		0	0	0	0	0	0	0
MYRIOPHYLLUM																						0	0	0	0	0	0		0	0	0	0	0	0	0
NYMPHAEACEAE																						0	0	0	0	0	0		0	0	0	0	0	0	0
OLEA	Olea	0	0	0	0	0	0	0	0	0	0	0	0	0	0	0	1					0	0	0	0	1	0		0	0	0	0	0	0	0
PEDIASTRUM																						0	0	0	0	0	0		0	0	0	0	0	0	0
PHILLYREA	Phillyrea	0	0	0	0	0	0	0	0	0	0	0	0	0	0	0	1					0	0	0	0	1	0		0	0	0	0	0	0	0
PICEA	Picea	0	1	0	0	0	0	0	0	0	0	0	0	0	0	0	0					1	1	0	0	0	0		0	0	0	0	0	0	0
PINUS																						0	0	0	0	0	0		0	0	0	0	0	0	0
PLANTAGO	Plantago	0	0	0	0	0	0	0	0	0	1	0	0	0	0	0	0					0	0	0	0	1	0		0	0	0	0	0	0	0
POLYPODIUM																						0	0	0	0	0	0		0	0	0	0	0	0	0
POPULUS	Populus	0	0	0	0	0	0	0	0	0	0	1	0	0	0	0	0					0	1	1	0	0	0		0	0	0	0	0	0	0
POTERIUM																						0	0	0	0	0	0		0	0	0	0	0	0	0
PTEROCARYA																						0	0	0	0	0	0		0	0	0	0	0	0	0
QUERCUS deciduous	Quercus (deciduous)	0	0	0	0	0	0	0	0	0	0	1	0	0	0	0	0					0	1	1	0	0	0		0	0	0	0	0	0	0
QUERCUS ILEX type	Quercus (evergreen)	0	0	0	0	0	0	0	0	0	0	0	0	0	1	0	0					0	0	1	0	1	0		0	0	0	0	0	0	0
RANUNCULACEAE																						0	0	0	0	0	0		0	0	0	0	0	0	0
RHAMNUS																						0	0	0	0	0	0		0	0	0	0	0	0	0
ROSACEAE undiff.	Rosaceae	0	0	0	0	0	0	0	0	0	1	0	0	0	0	0	0					0	0	0	0	1	0		0	0	0	0	0	0	0
RUBIACEAE	Rubiaceae	0	0	0	0	0	0	0	0	0	1	0	0	0	0	0	0					0	0	0	0	1	0		0	0	0	0	0	0	0
RUBUS																						0	0	0	0	0	0		0	0	0	0	0	0	0
RUMEX	Rumex	0	0	0	0	0	0	0	0	0	1	0	0	0	0	0	0					0	0	0	0	1	0		0	0	0	0	0	0	0
SALIX	Salix	1	0	1	0	0	0	0	0	0	0	1	0	0	0	0	0					1	1	1	1	0	0		0	0	0	0	0	0	0
SPARGANIUM type																						0	0	0	0	0	0		0	0	0	0	0	0	0
SPHAGNUM																						0	0	0	0	0	0		0	0	0	0	0	0	0
TILIA	Tilia	0	0	0	0	0	0	0	0	0	0	0	1	0	0	0	0					1	1	1	0	0	0		0	0	0	0	0	0	0
trilete spores																						0	0	0	0	0	0		0	0	0	0	0	0	0
TYPHA LATIFOLIA type																						0	0	0	0	0	0		0	0	0	0	0	0	0
ULMUS	Ulmus	0	0	0	0	0	0	0	0	0	0	0	1	0	0	0	0					1	1	1	0	0	0		0	0	0	0	0	0	0
UMBELLIFERAE																						0	0	0	0	0	0		0	0	0	0	0	0	0
URTICACEAE																						0	0	0	0	0	0		0	0	0	0	0	0	0
Varia erbaceae																						0	0	0	0	0	0		0	0	0	0	0	0	0
VIBURNUM																						0	0	0	0	0	0		0	0	0	0	0	0	0
VISCUM																						0	0	0	0	0	0		0	0	0	0	0	0	0
VITIS																						0	0	0	0	0	0		0	0	0	0	0	0	0
ZELKOVA																						0	0	0	0	0	0		0	0	0	0	0	0	0
																														0	0	0	0	0	0
