# Supplementary material for: Terrestrial biosphere changes over the last 120 kyr
Source: Copernicus journal article supplement (doi:10.5194/cp-12-51-2016), 2016-01-18
Supplement: Supplementary file 1 [file cp-12-51-2016-supplement.zip › supplement/Europe/NorthEuropeandEurasia_scores.xls]

## Sheet: But
Sample	Prelim age ka BP	tundra	boreal forest	temperate forest	warm temperate forest	desert	grassland and dry shurbland
1	0.0526	3.33623	17.8975	19.1484	7.61984	1.74624	6.14091
20	1.052	3.54756	16.0049	16.7955	6.10989	2.26959	8.55182
40	2.104	10.5542	19.7044	20.6039	12.6159	1.90594	11.7418
50	2.63	7.79071	19.4021	21.1024	12.7128	2.50938	17.2726
60	3.156	5.99461	27.5609	31.01	22.8612	1.67054	8.18124
70	3.682	5.19857	26.4987	29.8065	21.5866	2.04799	7.60457
80	4.208	2.82318	25.5135	28.8305	23.9217	0.96225	5.19173
90	4.734	3.2475	23.2012	27.4316	19.9029	1.28861	4.65121
100	5.26	4.86481	25.1288	28.2695	20.9261	1.42255	6.50789
110	5.786	5.51134	25.0572	27.1732	18.5852	2.33378	7.60464
120	6.312	7.50657	21.7292	22.7005	12.337	2.41532	7.95797
130	6.838	6.65312	18.1498	19.0717	10.6117	2.21233	6.2056
140	7.364	9.45825	19.9441	21.1974	9.4158	2.26182	9.0548
150	7.89	12.1513	17.6996	18.5826	8.06383	2.40601	13.9984
160	8.416	13.0712	18.408	18.824	10.5236	2.07973	10.0635
175	9.205	13.8533	17.7761	18.5369	8.8168	2.78262	13.0713
190	9.994	14.0578	17.8781	18.5031	6.14489	2.87847	15.8434
200	99.991	13.6818	18.2074	18.2074	6.87045	2.46951	11.9435
210	100.499	15.3886	14.2945	14.2945	7.91666	1.80907	9.51557
220	101.007	15.6931	14.8658	14.8658	7.50563	3.80731	13.2921
230	101.515	17.7216	15.2371	15.2371	7.428	4.99559	15.8506
240	102.023	15.5063	16.3572	16.3572	7.14047	4.56758	13.4895
250	102.531	16.3386	14.4705	14.4705	6.47924	4.85535	16.0889
260	103.039	14.8247	16.315	16.315	5.85167	4.23386	15.2807
270	103.547	12.6497	13.7075	13.7075	6.25066	3.91938	15.248
280	104.055	14.2821	17.3026	17.3026	7.25922	5.2807	14.7954
290	104.563	14.8099	12.8454	12.8454	5.80444	5.10111	18.9692
300	105.071	13.9579	13.1043	13.1043	6.95977	5.88254	17.9744
310	105.579	14.1202	15.5586	15.5586	8.07262	5.18448	17.3379
320	106.087	15.1081	14.2898	14.2898	7.06513	3.24833	15.5439
330	106.595	15.4569	13.3932	13.3932	6.76206	5.79202	16.1707
340	107.103	13.1046	10.2717	10.2717	4.55687	6.03373	18.1444
350	107.611	14.8875	7.08461	7.08461	4.32716	5.88488	15.4631
360	108.119	16.9698	10.8505	10.8505	5.39718	4.42204	14.5099
370	108.627	14.8603	6.32409	6.32409	3.13338	5.77621	18.1331
380	109.135	14.9399	8.04178	8.04178	4.40799	5.12161	15.4524
390	109.643	15.4301	10.3128	10.3128	4.39418	3.82191	17.2913
400	110.151	13.0028	13.895	13.895	6.48602	5.2816	16.4567
410	110.659	17.0836	11.4337	11.4337	4.18168	6.28572	14.3135
420	111.167	12.6654	10.2926	10.2926	4.67383	5.41578	18.397
430	111.675	16.6233	13.0954	13.0954	4.36767	4.99573	20.2192
440	112.183	15.819	9.7334	9.7334	5.18452	5.20389	16.9856
450	112.691	17.7732	11.6297	11.6297	4.1354	4.56819	17.8103
460	113.199	15.7495	10.8957	10.8957	2.59329	4.56896	20.2857
470	113.707	15.6257	13.3253	13.3253	4.32055	5.85593	19.0814
480	114.215	15.3326	8.63874	8.63874	3.91879	4.66536	20.8553
490	114.723	13.012	9.3657	9.3657	2.66076	4.29986	19.4028
500	115.231	17.0124	10.6914	10.6914	2.76972	3.86656	19.2882
510	115.739	17.6153	13.5336	13.5336	4.15243	6.35192	19.7421
515	115.993	18.3908	10.0921	10.0921	2.01887	4.90348	20.1446
525	116.501	17.0759	14.1014	14.8932	7.80854	3.45705	18.2668
535	117.009	14.3863	18.4967	18.4967	9.41873	3.78459	12.3264
545	117.517	13.8288	19.1364	19.1364	9.23028	6.10171	14.0161
550	117.771	10.8307	25.1206	25.9365	14.8316	2.49767	9.76604
565	118.533	9.49529	26.1251	26.1251	15.0041	3.30157	8.27224
575	119.041	11.9347	23.744	24.1567	12.8792	3.77507	9.60401
585	119.549	11.162	22.3551	22.7932	12.3224	4.09025	9.51293
595	120.057	9.80986	23.7743	24.1802	12.3312	3.08895	7.52457
605	120.565	11.2315	21.9867	21.9867	10.2042	4.8775	12.4917
615	121.073	10.9715	18.4063	18.4063	6.72431	4.41949	11.8322
625	121.581	6.74631	25.5076	27.4142	18.6536	1.79091	8.65887
635	122.089	9.59257	27.7627	28.9252	17.3219	1.7575	7.84704
645	122.597	8.62334	27.9596	29.7295	18.6414	1.27573	6.56524
655	123.105	8.5571	24.41	25.6362	15.0983	1.48025	5.26555
665	123.613	6.17964	24.5708	26.2266	16.8852	2.21404	8.07672
675	124.121	6.39152	27.4518	28.7125	19.0308	1.24256	4.85341
685	124.629	6.58363	27.9433	29.5382	22.8103	1.36134	8.39036
695	125.137	2.92826	26.5935	28.17	22.397	0.914449	5.47821
705	125.645	6.3279	28.7319	30.5052	21.8095	1.92022	8.06576
715	126.153	6.66856	27.452	30.6281	22.0238	2.09797	8.53746
725	126.661	3.27747	22.6406	24.8601	20.8979	1.43468	5.52586
735	127.169	4.53948	20.5365	24.7008	19.9601	1.38106	3.86126
745	127.677	4.83079	19.9429	26.74	22.8472	1.32482	3.35795
755	128.185	4.68556	15.4991	23.0138	18.324	1.51047	4.77779
765	128.693	4.56048	18.6131	25.3551	18.3728	1.53924	6.74818
775	129.201	5.1558	18.5384	20.6235	14.8645	1.84603	6.12651
785	129.709	7.84375	22.8363	25.7009	17.3036	2.92698	7.76629
800	130.471	6.56046	19.3905	19.3905	7.43899	5.94552	9.61983
810	130.979	7.7465	23.4568	24.508	13.2279	3.85936	9.16163
820	131.487	13.453	23.1166	24.0972	12.8064	4.90241	12.4195
910	136.059	10.8094	24.7644	25.5587	14.5798	3.98721	8.74678

## Sheet: Klinge
Sample	Approximate age (ka BP)	tundra	boreal forest	temperate forest	warm temperate forest	desert	grassland and dry shurbland
3	112.303	9.68312	20.5115	20.5115	11.7578	3.13043	10.2821
13	113.614	10.7387	24.6342	25.4541	16.1105	2.46786	7.10064
23	114.925	11.0528	21.6403	22.8552	14.8313	2.82209	7.84828
33	116.236	9.29266	24.7062	25.104	16.2148	2.33246	4.61636
43	117.547	10.2964	23.4533	24.614	16.4222	2.0514	8.83933
53	118.858	9.32833	23.6377	24.4145	17.1667	1.88891	6.40827
62	120.038	9.96424	24.6289	25.0658	17.8659	1.05465	6.13018
75	121.742	8.37117	23.5785	24.7625	16.5833	1.34748	6.38002
79	122.267	8.55047	23.4981	24.3765	17.9623	1.36083	4.53144
89	123.578	12.3649	22.3899	23.3238	15.9027	3.23444	7.72978
99	124.889	7.12229	23.1422	24.403	17.1038	1.05493	4.82851
108	126.069	10.7088	21.8475	23.3725	16.847	1.7009	5.49679
118	127.38	8.674	24.4555	26.1249	18.7478	1.61955	6.3985
128	128.691	10.4847	22.7718	24.174	17.2403	2.67772	7.64079
138	130.002	7.09584	23.9293	25.6648	18.8898	1.60906	4.64708		Eemian
148	131.313	10.0893	23.7823	24.8083	17.1522	1.7311	6.71363
158	132.624	7.41145	24.0744	25.9228	20.858	1.68573	4.21167
168	133.935	7.27345	26.1062	27.2598	21.4051	0.616626	3.15794
178	135.246	7.9722	24.8066	26.589	20.1448	1.9821	6.16081
188	136.557	8.32537	25.0302	26.883	21.7219	0.78326	3.47129
198	137.868
208	139.179	6.95135	22.6882	24.0773	17.1566	1.56318	4.80178
218	140.49
228	141.801	6.33332	24.8918	26.2569	20.3717	0	1.36505
238	143.112
248	144.423	7.61304	26.1718	27.2348	19.7904	0.375823	2.27747
258	145.734
268	147.045	5.92578	21.9685	23.4224	20.8753	0	0.806478
278	148.356
288	149.667	9.86039	21.7491	22.6671	20.7346	0.723992	1.82275
298	150.978
308	152.289	6.82792	22.3314	25.1376	23.7716	0.707107	2.82843
318	153.6
328	154.911	5.13265	20.2721	24.2655	22.4704	1.01144	2.02289
338	156.222
348	157.533	5.59088	19.6921	22.4111	19.8658	0.555985	2.4681
358	158.844
368	160.155	3.06763	19.8616	23.056	19.2298	0	0.836974
378	161.466
388	162.777	4.39939	18.5738	21.6275	19.3598	0.700569	2.26428
398	164.088
408	165.399	4.71079	17.8295	21.7133	19.2021	1.10889	2.6489
418	166.71
428	168.021	3.16509	16.5895	17.4573	7.92997	0.672166	2.67303
438	169.332
448	170.643	12.7259	19.6482	21.2696	10.9649	3.33406	9.28595
458	171.954
468	173.265	9.96113	20.8622	21.4057	14.8557	2.73223	6.82322
436	169.07	5.30448	17.3632	17.7484	8.41374	2.35142	7.12344
456	171.692	11.0651	18.3159	18.3159	8.12969	3.91392	9.05765
476	174.314	25.4702	26.7265	26.7265	15.3705	5.50964	18.1173
496	176.936	15.143	17.9489	17.9489	8.94747	3.51407	12.1063
516	179.558	16.1525	20.3862	20.3862	11.9164	3.77132	14.5967
536	182.18	16.8033	18.1186	18.1186	9.14859	4.29058	13.4966
546	183.491	11.1671	20.0504	20.0504	12.1791	2.86873	10.6224

## Sheet: Illinskoe
Sample	Age, ka, assumed BP	tundra	boreal forest	temperate forest	warm temperate forest	desert	grassland and dry shurbland
145	110.203	7.34485	11.1496	11.1496	3.82129	3.82129	12.4637
160	110.78	3.7796	22.998	23.6574	12.3182	0.65938	3.95628
180	111.55	0.605228	18.7965	19.4017	10.6096	3.5078	4.11302
200	112.32	3.56229	23.519	24.4495	13.3021	2.45551	4.42936
210	112.705	4.31544	26.6164	30.5266	27.6298	0.965609	3.2968
220	113.09	2.37999	23.8167	27.0296	25.3224	0.42679	1.63393
230	113.475	1.73631	24.087	27.386	25.8429	0.930484	1.39573
250	114.245	2.82705	20.3277	23.9414	22.9688	0.735215	1.47043
270	115.015	3.02636	21.2227	26.3009	24.9018	0.864675	0.864675
290	115.785	2.48711	19.5183	27.4022	25.8254	0.525588	1.96152
310	116.555	1.5816	15.7321	23.8922	18.8267	1.60471	3.84144
330	117.325	4.52897	10.6794	20.4265	17.8221	0.6415	3.24597
340	117.71	4.81166	16.025	17.3438	10.591	2.08015	6.32114
360	118.48	3.24492	18.394	18.9647	10.1985	4.41098	5.80898
380	119.25	5.43136	17.244	17.244	7.98651	4.80197	7.52054
400	120.02	8.8588	15.7981	16.3334	7.11221	6.28747	10.0725

## Sheet: Horoszki
indicator added	depth [cm]	Age, ka, assumed BP	tundra	boreal forest	temperate forest	warm temperate forest	desert	grassland and dry shurbland
2420	105	75.4105	12.1654	8.44645	9.20564	6.28992	3.73082	17.5979
2700	115	75.5115	11.3422	8.34085	8.34085	4.40955	4.02073	15.4417
2700	125	75.6125	11.7342	8.62368	8.62368	3.81475	4.36983	16.6678
2700	135	75.7135	11.1719	10.5443	10.5443	5.12399	3.49263	15.4877
2700	145	75.8145	11.5809	11.1401	11.1401	6.01295	3.80077	14.8361
3630	150	75.865	11.3633	9.82452	9.82452	6.42058	3.23147	15.405
2700	154	75.9054	10.4116	12.259	12.259	7.50626	3.51991	13.6679
2700	164	76.0064	10.6991	10.8687	10.8687	6.25371	3.49743	15.2054
2700	174	76.1074	9.02625	12.8516	13.0852	8.57894	2.53529	11.6133
2700	184	76.2084	9.60088	12.5112	12.5112	7.06291	3.28507	13.2994
2700	194	76.3094	8.43254	13.1231	13.1231	7.03508	3.54583	12.3265
2700	204	76.4104	9.31711	13.8395	14.1621	8.5879	3.11511	13.2288
2700	214	76.5114	7.61818	12.948	12.948	8.44343	1.68133	10.8727
2700	224	76.6124	8.55105	13.4566	13.4566	8.21874	2.92349	11.1929
2700	233	76.7033	7.24354	14.4043	14.4043	8.60352	2.0874	10.7904
2700	238	76.7538	9.53006	13.5033	13.5033	6.99654	3.77103	13.5302
2700	246	76.8346	10.0352	11.986	11.986	6.7671	3.3171	14.8055
2700	252	76.8952	10.2731	12.016	12.3408	7.15922	2.88895	13.7479
2700	265	77.0265	10.6203	13.0779	13.0779	6.95021	3.35685	14.1418
2700	275	77.1275	9.60247	12.556	12.8834	7.54949	3.76964	13.894
2700	285	77.2285	11.2112	11.6949	11.6949	6.92487	3.43204	15.7473
2700	295	77.3295	9.31069	12.3239	12.3239	7.22778	3.11485	13.4112
2420	300	77.38	11.6091	11.3916	11.3916	7.14138	2.89193	15.5853
2700	305	77.4305	10.8838	13.1852	13.1852	7.48532	2.87524	14.8272
2700	315	77.5315	9.75938	12.622	12.622	8.23735	3.06754	13.1476
2700	325	77.6325	9.97508	13.3746	13.3746	7.74894	3.87586	15.9379
2700	335	77.7335	9.85645	12.1071	12.4217	7.33245	2.93494	13.1787
2700	345	77.8345	10.6739	11.72	12.095	7.35499	4.24664	15.789
2700	355	77.9355	10.3446	10.7926	10.7926	6.38029	4.83603	14.4928
2700	365	78.0365	12.173	11.5609	11.9241	6.8031	4.11288	16.6206
2700	375	78.1375	10.879	12.5303	13.0126	8.29619	4.19947	13.0919
2700	385	78.2385	11.7176	12.2532	13.0456	7.88909	3.80349	14.529
2700	395	78.3395	11.5807	10.9201	11.3217	7.1069	3.6643	12.3467
3630	401	78.4001	13.8165	9.2656	9.2656	5.50297	3.05295	16.1001
2700	405	78.4405	12.6492	11.6199	12.0146	7.66451	4.04338	15.5742
2700	414	78.5314	9.94201	12.8659	13.2548	8.33048	5.42877	15.6345
2700	424	78.6324	10.3353	12.6108	12.9799	6.83705	4.21546	14.2947
2700	434	78.7334	10.0851	13.7448	14.2131	8.38791	4.58623	14.1407
2700	444	78.8344	10.6029	13.5559	13.5559	6.75981	4.2381	15.2055
2700	454	78.9354	10.8688	14.8456	15.6469	9.66397	4.85941	12.8995
2700	464	79.0364	10.5585	11.2887	11.6536	5.73848	4.44467	16.3134
2700	474	79.1374	11.0289	11.6886	11.9903	5.65581	4.72703	14.9756
2700	484	79.2384	11.1967	13.2427	13.5562	7.74988	4.79391	15.5474
2700	494	79.3394	10.8892	12.7002	12.7002	6.99405	5.0205	14.7428
2700	499	79.3899	10.8089	12.515	12.515	7.17697	4.57611	15.3785
2700	504	79.4404	11.0672	13.3487	13.6947	7.87439	4.12472	15.0637
2700	509	79.4909	12.1289	11.9008	11.9008	6.06331	4.54772	15.6428
2700	512	79.5212	11.5532	14.8692	15.3822	8.82847	5.03619	15.0681
2700	519	79.5919	11.4366	12.6783	13.2091	6.98362	4.30612	15.6964
2700	526	79.6626	10.6467	13.8298	14.2925	7.92706	4.63308	15.0769
2700	533	79.7333	11.7479	13.1921	13.1921	7.43127	4.13713	15.9978
2700	540	79.804	11.6855	12.7469	13.3778	7.54306	3.80275	14.6987
2700	547	79.8747	11.7532	12.5989	13.2019	8.01523	4.68693	14.5631
2700	554	79.9454	10.4938	12.6882	12.6882	6.20338	4.23577	16.6594
2700	561	80.0161	12.0969	13.6998	14.0669	7.98769	4.70196	16.7827
2700	564	80.0464	10.9895	12.8311	13.1751	7.27962	4.94328	15.0729
2700	567	80.0767	10.1632	12.3519	12.6873	7.02802	5.09064	16.4324
2700	574	80.1474	10.7333	13.4838	13.9592	7.71909	5.69839	14.9924
2700	581	80.2181	10.1544	12.2708	12.2708	5.5631	2.93317	14.6413
2700	585	80.2585	11.0461	9.91722	9.91722	4.98385	3.95022	16.7569
2700	595	80.3595	11.7191	12.8532	12.8532	6.24388	3.71925	16.0486
2700	605	80.4605	11.3472	10.9993	11.5449	8.08399	6.23815	18.0314
2700	610	80.511	10.8748	13.2429	13.2429	7.68955	4.90588	15.4831
2700	620	80.612	11.0976	11.2594	11.2594	6.93541	5.454	15.8817
2700	625	80.6625	10.9236	11.2845	11.6756	6.56616	5.84188	16.404
2700	635	80.7635	10.5636	11.026	11.454	6.17376	5.92611	17.1362
2700	645	80.8645	10.4394	10.7172	10.7172	5.52379	4.8396	17.3555
2700	655	80.9655	9.95106	11.5816	11.9645	6.9006	5.63804	16.1993
2700	665	81.0665	11.3791	9.9201	10.2433	6.21428	5.60312	17.8249
2700	675	81.1675	10.9476	10.0644	10.0644	5.18809	5.50371	16.042
2700	680	81.218	11.7154	11.6109	11.6109	6.90545	5.77857	18.4754
2700	685	81.2685	10.7425	11.6056	11.6056	6.18871	3.39857	15.3543
2700	692	81.3392	10.4652	8.86337	8.86337	5.82172	4.62728	17.1173
2700	704	81.4604	10.0349	10.7862	10.7862	5.9572	3.87917	21.5248
2700	714	81.5614	9.75498	8.03184	8.03184	4.8656	5.27523	19.3827
2700	723	81.6523	9.19786	9.82457	9.82457	5.52266	4.07033	18.8323
2700	732	81.7432	10.2743	7.8979	7.8979	4.57395	4.25932	18.1444
2700	742	81.8442	10.8058	9.67931	10.0191	6.57128	4.61518	20.1782
2700	747	81.8947	9.98561	13.1853	13.4736	7.58907	4.33792	16.0399
2700	752	81.9452	8.8284	11.2342	11.5415	7.28009	4.11534	11.8834
2700	757	81.9957	10.3062	12.0402	12.0402	6.65408	4.36501	15.0188
2700	762	82.0462	11.6774	10.4707	10.8254	7.69822	4.77717	16.0798
2700	772	82.1472	9.67576	9.66739	10.0719	6.48933	5.66379	15.0082
2700	780	82.228	11.18	11.8112	11.8112	7.26133	4.00774	14.1518
2700	785	82.2785	10.9497	13.0442	13.6628	7.54246	4.73063	15.3025
2420	790	82.329	9.34029	11.418	11.418	7.59284	4.55347	11.4123
2700	795	82.3795	9.28092	13.1493	13.1493	6.94704	4.76797	14.3611
2420	800	82.43	9.78984	13.3517	13.3517	7.25208	4.42601	14.2685
2420	830	82.733	9.235	9.81188	9.81188	5.72464	5.49698	16.7889
2700	838	82.8138	7.48114	12.8379	12.8379	7.84654	4.31557	10.8831
2420	847	82.9047	9.11271	12.2731	12.2731	6.89969	3.68017	13.1767
2700	857	83.0057	8.06072	12.6123	12.6123	7.82352	4.71287	12.0122
2420	867	83.1067	8.29872	14.1854	14.1854	7.64021	3.70842	11.7291
2700	877	83.2077	7.58028	14.1671	14.7933	8.28509	3.83814	8.70094
2420	887	83.3087	8.28404	14.1437	14.4118	8.35644	3.97512	11.3409
2700	897	83.4097	5.72668	15.1869	15.1869	7.4047	2.95804	8.92949
2420	907	83.5107
2700	917	83.6117	4.33878	15.8231	15.8231	7.50362	2.89272	6.84524
2420	927	83.7127
2700	937	83.8137	3.53152	16.0823	16.4022	8.90449	1.53432	4.16095
2420	947	83.8553
2700	955	84.0865	4.97928	13.5876	14.2325	4.0666	2.68435	7.74351
2700	959	84.2021	6.09981	13.4559	14.1676	4.84839	3.89752	9.69492
2420	965	84.3755	10.8816	12.258	12.258	6.88775	3.97015	16.2642
2700	975	84.6645	9.96534	11.9683	11.9683	6.07038	6.88073	14.4734
2420	985	84.9535	12.3593	12.1202	12.1202	6.4172	6.4367	16.666
2700	995	85.648	9.49694	12.2834	12.2834	6.46944	6.58688	14.5296
2420	1000	85.992	11.2665	11.3837	11.3837	7.22907	6.66016	18.4783
2420	1005	86.336	8.72096	14.5374	14.8564	8.33096	6.67518	15.6958
2700	1010	86.68	8.29733	15.0448	15.0448	8.70212	5.16949	12.5443
2700	1015	87.024	8.2839	15.525	15.7999	8.21273	6.26512	14.4026
2420	1024	87.6432	8.31846	14.924	15.2853	8.97542	5.33559	12.4228
2700	1029	87.9872	6.74822	16.2255	16.2255	8.6849	5.12884	10.6057
2420	1039	88.6752	7.65133	16.8016	16.8016	9.2613	4.83513	11.5563
2700	1049	89.3632
2420	1059	90.0512	6.22288	15.6901	15.6901	9.50758	4.26155	9.69994
2700	1069	90.7392
2420	1079	91.4272	5.18981	15.496	15.496	9.50092	3.25165	7.23377
2700	1084	91.7712
2700	1094	92.4592	5.53519	17.1279	17.4897	9.07178	3.80462	9.16403
2420	1099	92.8032
2420	1109	93.4912	2.82725	16.458	16.8517	9.78362	0.787499	4.06217
2420	1120	94.248
2420	1130	94.936	2.46174	17.1307	17.4459	9.07991	1.33763	3.09581
2700	1135	95.28
2420	1140	95.624	2.5643	17.5478	17.5478	9.83397	0.996134	3.37433
2420	1184	98.6512
2420	1192	99.2016	2.26318	16.5845	17.302	9.37917	1.30791	2.80111
3630	1197	99.5456
2420	1209	100.371	2.95335	16.1615	16.7801	7.05831	1.3673	3.55412
2420	1219	101.059
2420	1233	102.022	8.81505	15.1627	15.1627	7.3189	6.20688	12.7024
2420	1237	102.298
2420	1241	102.573	9.88206	14.8896	14.8896	7.42582	5.7007	12.7941
2420	1253	103.398
3630	1261	103.949	3.70467	15.1945	15.1945	6.28425	1.58596	4.52329
2420	1265	104.134
2420	1273	104.366	6.98287	13.6789	14.1441	4.55065	3.22154	9.64225
2700	1281	104.598	10.9034	14.3962	14.8354	8.34642	5.26145	13.4565
2420	1295	105.004	7.88109	12.9957	13.291	6.2591	5.69069	14.4458
2700	1301	105.178	10.2821	12.428	12.428	8.31426	4.87461	13.8396
2420	1310	105.439	10.9688	15.2138	15.2138	9.87198	4.6774	14.4407
2420	1320	105.729	12.7129	13.3263	13.7748	9.13708	4.23719	13.2398
2420	1330	106.019	12.7586	13.78	14.3385	9.86022	5.06804	13.1955
2420	1340	106.913	11.4121	17.2869	17.8006	11.9516	3.90698	9.89976
2700	1345	107.371	8.57819	17.8091	18.1992	12.4914	3.90137	9.47309
2700	1350	107.83	5.22494	15.1586	15.1586	10.4781	2.31848	7.51483
2700	1355	108.288
2420	1359	108.655	4.08124	15.7104	16.0263	10.6336	1.15317	3.54667
2700	1361	108.839
2700	1365	109.206	3.51889	15.9738	16.3729	10.2263	1.02871	2.39113
2420	1369	109.572
2420	1374	110.031	4.24097	13.6159	14.0109	10.2639	0.27929	2.82709
2420	1378	110.398
2700	1380	110.581	4.14225	15.3816	15.9041	11.3976	0.603297	3.61978
2700	1384	110.948
2420	1388	111.315	2.91467	23.0096	25.7956	16.5915	0.335389	2.24389
2700	1392	111.681
2700	1396	112.048	2.18176	23.6332	26.3988	18.5693	0.266406	3.16304
2420	1400	112.415
2700	1404	112.782	2.06405	22.1089	24.0113	18.9314	0.354999	0.969874
2700	1408	113.149
3630	1412	113.515	1.68874	22.5006	24.3507	18.8788	0	1.99443
2700	1416	113.882
2420	1420	114.249	1.18191	20.0336	21.7997	18.392	0.499532	1.68144
2700	1424	114.616
2700	1427	114.891	1.53735	20.7009	22.0591	18.7456	0	0.94821
2420	1430	115.166
2700	1433	115.441	1.09923	21.9622	23.5677	21.7578	0.367442	0.734884
2700	1435	115.625
2420	1440	116.083	1.1201	23.1604	24.5383	23.6194	0.356009	1.61469
2700	1445	116.542
2420	1450	117	1.63547	23.0496	24.7817	23.7972	0.26968	1.57181
2700	1455	117.459
2420	1460	117.917	1.7049	22.8388	24.7356	23.7277	0.503953	1.69601
2700	1465	118.375
2420	1470	118.834	1.46389	23.8394	25.8266	24.3029	0.573514	2.21131
2700	1495	121.126
2420	1500	121.585	1.39653	19.3935	21.9529	20.5962	0.668511	2.4825
3630	1505	122.043
2420	1510	122.502	1.58056	18.0648	22.4944	20.5491	0.870114	3.65046
2700	1515	122.96
2420	1520	123.419	3.45191	14.3363	20.5843	18.1902	0.948916	4.43154
3630	1525	123.877
2700	1530	124.336	3.4041	16.2336	22.8614	18.4491	1.32334	4.5887
3630	1534	124.703
2420	1539	125.161	5.05701	12.1112	19.1888	16.1925	1.69044	5.78364
2420	1544	125.62
2700	1549	126.078	4.17277	17.0982	21.8701	15.1256	1.64583	5.06998
2420	1554	126.537
2700	1559	126.995	3.5621	16.5743	18.8044	11.4449	1.4369	4.90146
2420	1564	127.454
2700	1569	127.912	4.18229	17.6194	18.149	8.79709	1.85369	4.43023
2420	1574	128.371
2700	1579	128.829	8.01113	18.7177	19.5628	13.6467	4.42529	9.13828
2420	1584	129.288
2420	1589	129.746	9.734	19.3134	20.4475	16.3623	5.58501	12.4662
