# Supplementary material for: Terrestrial biosphere changes over the last 120 kyr
Source: Copernicus journal article supplement (doi:10.5194/cp-12-51-2016), 2016-01-18
Supplement: Supplementary file 1 [file cp-12-51-2016-supplement.zip › supplement/Europe/SouthernEuropescores.xls]

## Sheet: Lagaccione
metres	Age (ka), assumed BP	boreal forest	temperate forest	warm-temperate forest	tundra	grassland and dry shrubland	desert
1.24	6.85289	8.69333	15.3657	16.8459	5.84388	17.2764	0
1.28	6.92892	10.1525	17.3472	19.3327	5.27684	10.8395	0
1.32	7.00496	9.77105	17.7603	19.5788	4.81735	10.8145	0
1.36	7.08099	9.21293	17.0042	18.6304	3.9944	11.0555	0
1.4	7.15702
1.44	7.23305	8.99621	17.5344	19.3798	5.7552	11.2655	0
1.48	7.30908
1.52	7.38512	11.7278	19.6315	21.2364	3.74417	8.91818	0
1.56	7.46115
1.6	7.53718	12.1846	20.4565	23.1036	3.83468	9.53958	0
1.64	7.61321
1.68	7.68924	13.4625	21.4485	22.6695	4.33402	10.3306	0
1.72	7.76528
1.76	7.84131
1.8	7.91734	12.593	20.03	22.0645	3.78022	9.09805	0.332228
1.84	7.99337
1.88	8.0694
1.92	8.14544	12.4902	19.6342	20.9142	2.88826	8.51642	0
1.96	8.22147
2	8.2975
2.08	8.44956	13.092	20.9158	22.6813	4.08442	8.77124	0
2.16	8.60163
2.24	8.75369
2.32	8.90576	12.818	20.3867	21.9454	3.97849	7.78104	0
2.4	9.05782
2.48	9.20988
2.56	9.36195	14.855	21.4725	23.4235	3.22226	9.32124	0
2.64	9.51401
2.72	9.66608
2.8	9.81814	14.4543	20.0079	22.8115	2.36646	6.15372	0
2.88	9.9702
2.96	10.1223
3.04	10.2743	14.9689	22.4118	23.2009	2.97512	5.05183	0
3.12	10.4264
3.16	10.5024
3.2	10.5785	12.1072	19.7349	20.6229	2.41457	4.71171	0
3.24	10.6545
3.32	10.8066
3.36	10.8826	10.7666	18.5196	20.6342	2.30114	8.12685	0
3.4	10.9586
3.44	11.0347
3.52	11.1867	9.78103	17.6221	18.3251	2.56307	4.72458	0
3.6	11.3388
3.68	11.4908	11.2595	18.5084	19.1393	2.52712	6.25447	0
3.76	11.6429	11.0941	19.2011	20.2169	2.58349	5.44568	0
3.84	11.795	9.01893	16.8712	18.2159	2.17857	6.60319	0
3.92	11.947	7.09228	15.9279	16.5137	2.04526	7.54198	0
4	12.0991	6.88066	14.5751	15.9559	3.92335	10.9734	0
4.08	12.2512	6.0707	12.0188	11.8381	5.49405	14.1016	0.56842
4.16	12.4032	5.73021	9.36387	8.43339	5.1945	16.1494	0
4.24	12.5553	6.27441	10.5363	9.58394	5.04009	15.5807	0.631824
4.32	12.7074	6.6554	10.6334	9.58507	5.02625	15.0247	0
4.4	12.8594	6.20718	10.3689	8.77282	4.46809	14.4269	0.413096
4.48	13.0115	6.77331	10.3467	9.38595	4.53951	12.9031	0.392232
4.56	13.1635	9.08898	13.8822	13.2879	4.49719	12.2429	0
4.64	13.3156	8.2697	12.9644	12.3182	4.53574	13.172	0.484218
4.72	13.4677	10.6758	16.5111	15.8635	4.56519	11.572	0
4.8	13.6197	10.4599	16.7445	15.9093	4.33746	9.91201	0
4.88	13.7718	10.2573	16.272	15.7487	5.36655	11.1438	0
4.96	13.9239	5.44078	9.84098	8.31113	6.29351	12.7438	0
5.04	14.0759	4.50061	6.29426	5.02596	5.72938	16.7948	0
5.12	14.228	4.15895	6.22915	5.03392	6.25399	16.5942	0.451754
5.2	14.3801	6.18996	7.89001	6.57315	7.31054	16.6337	0
5.28	14.5321
5.36	14.6842	3.86974	5.5751	3.68317	6.37905	18.1906	0
5.44	14.8363
5.6	15.1404	4.64079	5.81794	4.45868	6.94835	15.7654	0
5.68	15.2924
5.84	15.5966	5.03504	6.60103	4.69796	6.54857	16.3997	0
6	15.9007
6.16	16.2048	2.44566	2.44566	1.89601	4.8776	19.7032	0.54965
6.32	16.509
6.64	17.1172	2.32726	3.04895	2.16506	4.7027	17.9334	0.721688
6.96	17.7255
7.28	18.3337
7.6	18.942	4.13359	4.70432	4.13359	4.87632	21.0115	0
7.92	19.5502
8.3	20.2725
8.6	20.8428	3.93977	4.80044	4.80044	5.56745	20.7512	0.860663
9	21.6031
9.4	22.3634
9.8	23.1237	2.01153	2.01153	2.54913	3.91381	19.468	0
10.1	23.694
10.5	24.4543
10.9	25.2146	3.52238	3.52238	3.52238	5.72761	21.2628	0
11.3	25.9749
11.7	26.7353
12	27.3055	2.32707	2.32707	1.80579	5	18.1556	0.521286
12.4	28.0658
12.8	28.8261
13.1	29.3964	4.20627	4.76881	3.64372	4.50035	23.3067
13.5	30.1567
13.9	30.917
14.3	31.6773	2.28493	2.28493	2.28493	4.6569	20.3488	0
14.7	32.4377
15	33.0079
15.4	33.7682	4.8189	4.8189	4.8189	6.10991	22.6555	0
15.8	34.5285
16.1	35.0988
16.5	35.8591	2.64135	2.64135	2.64135	4.87572	22.0643	0
16.9	36.6194
17.3	37.3797
17.5	37.7599	5.33891	6.23784	3.33244	6.24862	18.8008	0.449467
17.7	38.1401
18	38.7103
18.2	39.0905	2.00574	2.5418	2.5418	4.18673	21.7458	0.536056
18.4	39.4706
18.6	39.8508
18.8	40.2309	0.848189	0.848189	0.848189	4.52809	20.3434	0.59976
19.1	40.8012
19.3	41.1813
19.5	41.5615	5.08987	6.77798	5.97084	5.16565	18.3467	0
19.7	41.9417
19.9	42.3218
20.1	42.702	2.72921	2.72921	2.20863	4.71762	21.1837	0.520579
20.3	43.0821
20.5	43.4623
20.7	43.8425	2.47927	3.04093	2.24662	4.99735	20.1806	0
21	44.4127
21.2	44.7929
21.4	45.173	3.52172	4.14551	2.89794	5.49568	19.6832	0
21.6	45.5532
21.8	45.9333
22.1	46.5036	2.50825	3.12606	2.25235	5.65918	20.955	0.617802
22.3	46.8837
22.5	47.2639
22.7	47.6441	1.91159	3.16355	2.37174	4.81638	21.7087	1.11979
22.9	48.0242
23.1	48.4044
23.3	48.7845	5.75266	7.2934	4.88883	5.6388	20.822	0
23.5	49.1647
23.7	49.5449
24	50.1151	9.46148	11.9202	8.94493	5.87663	14.1554	0
24.2	50.4953	5.40301	7.31109	5.22413	5.96638	19.3942	0.85332
24.4	50.8754
24.6	51.2556	4.89111	6.46107	5.0285	6.87839	21.0036	0
24.8	51.6357
25.1	52.206	3.90511	4.95148	3.74323	5.16514	20.8863	0.604122
25.3	52.5861
25.5	52.9663
25.8	53.5365	10.5316	12.2489	8.03158	6.47721	16.0628	0.51778
26	53.9167
26.2	54.2969
26.5	54.8671	5.49314	6.69797	3.3934	3.87383	11.6275	0.40161
26.7	55.2473
26.9	55.6274
27.3	56.3877	2.03419	2.99312	2.31505	3.52332	16.8707	0
27.5	56.7679
27.7	57.1481	7.09091	9.67954	6.47541	3.77789	10.4944	0
27.9	57.5282	12.7028	15.557	11.7478	7.401	13.2672	0.451294
28.1	57.9084	12.3628	15.7332	12.7141	4.38875	12.0886	0
28.3	58.2885	13.1762	16.882	14.1507	7.18244	15.3042	0
28.5	58.6687	11.1538	14.9501	12.1362	5.30802	12.7383	0
28.8	59.2389	7.12724	10.0903	7.95906	5.4681	14.8967	0
29	59.6191	8.6419	11.3326	8.56999	6.26066	17.2447	0
29.2	59.9993	11.6802	14.0974	10.2735	5.50832	13.3613	0
29.5	60.855	6.84192	8.94152	7.97816	3.8877	14.6991	0
29.7	61.425	2.71836	3.48419	2.71836	5.16525	20.1513	0
29.9	61.995
30.1	62.565	2.89886	2.89886	2.89886	3.85304	21.6646	0.529256
30.4	63.42
30.6	63.99	2.77432	3.54016	2.99863	3.67284	20.8043	0.54153
30.8	64.56
31	65.13	5.42173	6.26388	3.63525	5.05021	17.9713	0.595491
31.2	65.7
31.5	66.555	8.38867	10.433	8.921	5.60799	17.2032	0
31.7	67.125
31.9	67.695	8.352	10.2894	7.61643	6.2395	16.9562	0.732252
32.1	68.265
32.3	68.835	7.95283	10.5615	7.82609	4.56583	16.1559	0.434783
32.5	69.405
32.7	69.975	4.50071	5.23993	4.71722	3.50643	18.5432	0.522708
32.95	70.6875
33.2	71.4	2.98938	2.98938	2.31973	5.52207	18.007	0.66965
33.4	71.97
33.6	72.54	2.34888	2.34888	2.34888	4.7706	19.7958	0.58722
33.8	73.11
34	73.68	2.42815	2.42815	1.48604	4.79214	17.5482	0
34.2	74.25
34.45	74.9625	4.00299	4.54853	3.05808	3.90851	15.1817	0
34.7	75.675
34.8	75.96	3.73541	4.25812	2.47348	3.65896	12.6077	0
34.9	76.245
35	76.53	3.17598	4.55393	2.8663	3.93781	16.442	0
35.1	76.815
35.2	77.1	3.24979	3.986	2.72921	3.53074	16.4599	0.520579
35.3	77.385
35.4	77.67	5.74402	6.83348	4.67191	5.70774	16.0622	0.544735
35.5	77.955
35.6	78.24	10.0489	13.4078	11.3803	6.26883	15.1225	0
35.7	78.525	8.25973	13.1687	11.4798	3.9741	12.8524	0
35.8	78.81	10.2515	14.4368	11.9972	5.90139	13.4345	0
35.9	79.095	12.9551	18.204	16.0962	6.16188	13.6355	0
36	79.38	11.782	17.6207	14.8246	3.74699	9.40816	0.395904
36.05	79.5225	6.98142	9.811	9.16998	5.18083	17.0899	0.571662
36.1	79.665	6.45678	8.63896	6.1646	5.14238	15.989	0
36.15	79.8075	6.17156	8.49532	6.72235	5.83351	14.1384	0.443242
36.2	79.95	5.23845	6.41697	6.26405	3.90868	14.4845	0
36.25	80.0925	5.26799	7.75507	6.39284	5.12908	16.7261	0
36.3	80.235	14.4015	18.8297	16.3974	3.96593	11.5916	0
36.4	80.52	14.0534	17.5224	15.4139	3.04895	9.36184	0.4598
36.5	80.805	16.6592	19.587	16.9374	2.85246	4.25797	0
36.6	81.09	16.1936	20.8253	19.095	2.26789	6.55764	0
36.7	81.375	14.5198	21.3324	19.9484	2.55521	8.67425	0.693932
36.8	81.66	8.20039	15.2766	14.0828	3.75626	12.0297	0
36.9	81.945	8.09243	13.1128	11.0734	5.46825	14.6485	0
37	82.23	4.21502	6.56893	5.67923	5.43612	15.6734	0.513665
37.1	82.515	11.2129	16.0089	14.5218	4.51168	14.715	0
37.2	82.8	11.0284	14.4059	13.4087	4.40309	14.3414	0
37.3	83.085	12.6833	16.5735	13.5003	6.63716	14.2936	0
37.4	83.37	16.048	19.4502	15.6385	3.29903	7.80687	0
37.5	83.655	16.3028	20.0836	15.4006	2.53452	5.48125	0.354663
37.55	83.7975	18.3188	24.3525	21.8865	4.46668	8.79691	0
37.6	83.94	15.4281	20.1252	19.8646	2.56688	4.55518	0
37.65	84.0825	16.7497	23.0736	21.8995	3.81875	7.23484	0
37.7	84.225	17.9466	23.4754	23.0192	3.2792	6.2976	0
37.75	84.3675	12.8094	20.9863	20.5742	3.75087	9.34581	0
37.8	84.51	3.02138	5.76214	5.87651	3.09362	15.3223	0
37.9	84.795	3.7577	5.57028	4.14457	2.39586	16.6026	0.784867
38	85.08	1.9386	3.89976	3.39339	3.39557	15.8511	0.716115
38.1	85.365	3.0952	4.8085	4.8085	3.06486	17.9467	0
38.3	85.935	3.08532	4.47397	4.47397	3.44718	20.63	0.524864
38.5	86.505	3.25472	4.8492	2.89637	0	12.2958	0					LOW POLLEN COUNT
38.7	87.075	3.54459	5.14587	4.13313	4.52555	22.6414	0.877058
39	87.93	8.56079	10.5012	7.27342	5.08861	20.3023	0
39.2	88.5	16.9575	20.6896	14.7396	6.99726	12.6096	0
39.4	89.07	16.9712	18.9093	12.2163	4.52051	5.67732	0
39.6	89.64	18.1665	21.3991	13.6638	5.66068	6.49805	0
39.8	90.21	16.9877	19.2498	11.6361	4.13702	5.42113	0
40.1	91.065	16.9062	19.172	10.8546	3.38929	6.25171	0.509317
40.2	91.35	17.6577	21.5119	14.9502	3.67957	4.87042	0
40.42	91.977	17.1315	20.1044	12.0619	3.00037	4.92141	0
41.3	94.485	17.8565	20.3103	13.342	2.70081	3.02247	0
41.6	95.34	18.4091	20.825	14.7952	3.67143	5.33228	0
41.95	96.3375	12.9609	18.8788	18.2505	2.72101	6.57857	0

## Sheet: Lago di Vico
metri	Age Quest (ka BP)	boreal forest	temperate forest	warm-temperate forest	tundra	grassland and dry shrubland	desert
0.28	7.82077	9.58909	18.6984	21.5954	6.06758	12.3732	0
0.3	7.94193	10.3233	18.9692	20.0898	6.24267	9.95695	0
0.32	8.06309	10.8804	18.4531	20.6603	6.24619	12.5221	0
0.34	8.18425	9.75622	17.2398	19.5976	5.96557	12.1634	0
0.36	8.30542	7.60714	15.2627	17.4108	4.64366	12.0871	0
0.38	8.42658	8.10207	15.6214	17.9452	6.25733	14.3383	0
0.4	8.54774	7.07339	15.3295	17.1739	4.79399	11.7598	0
0.42	8.6689	9.61234	18.2698	19.7702	5.66829	11.593	0
0.44	8.79006
0.46	8.91123	10.3888	18.8978	20.7777	5.92449	16.3204	0
0.48	9.03239
0.5	9.15355	9.44334	17.8993	19.89	6.21466	14.0854	0
0.52	9.27471
0.54	9.39587	10.8097	18.9266	20.7833	6.74473	16.2256	0.384331
0.56	9.51704
0.58	9.6382	9.41044	17.5371	19.0442	7.13666	13.3885	0.37037
0.6	9.75936
0.62	9.88052	8.65494	16.5784	18.1701	5.65206	11.3873	0
0.64	10.0017
0.66	10.1228	9.88358	17.8365	19.0802	7.14352	12.4981	0
0.68	10.244
0.7	10.3652	10.924	19.8029	22.861	5.47448	9.60169	0.340799
0.72	10.4863
0.74	10.6075	12.6601	20.7477	22.3127	6.72229	11.0412	0
0.76	10.7287
0.78	10.8498	10.9129	19.386	21.6272	6.03928	12.2227	0
0.8	10.971
0.82	11.0921	10.3005	17.7567	20.7107	5.91802	10.8843	0
0.84	11.2133
0.86	11.3345	10.2763	18.1923	19.9163	4.84288	9.05426	0
0.88	11.4556
0.9	11.5768	10.8303	18.4947	20.2052	5.39548	8.90204	0
0.92	11.698
0.94	11.8191	11.0366	18.7763	19.8804	5.57678	7.91383	0
0.96	11.9403
0.98	12.0614	9.10929	16.3858	18.0021	4.54347	9.01133	0
1	12.1826
1.02	12.3038	9.88435	16.709	18.0739	5.5574	9.424	0
1.04	12.4249
1.06	12.5461	8.84615	15.9621	18.0336	4.00862	8.99151	0
1.08	12.6672
1.1	12.7884	12.4847	19.5468	21.0219	5.33771	8.24995	0
1.12	12.9096
1.14	13.0307	8.90519	15.1221	16.6287	3.91105	6.5363	0
1.16	13.1519
1.18	13.2731	8.75567	15.0501	15.4707	3.12945	6.33336	0
1.2	13.3942
1.22	13.5154	6.72906	13.2644	13.4506	4.27758	11.5593	0.585875
1.24	13.6365	3.97233	9.20723	9.74919	4.79298	18.4832	0
1.26	13.7577	6.90637	12.3544	10.7967	5.54779	17.4206	0.3253
1.28	13.8789	4.4009	9.2846	8.90002	4.7807	16.1406	0
1.3	14	6.15543	11.1961	10.5158	6.09851	16.4458	0.602475
1.32	14.1212	6.88021	10.8577	10.182	5.68587	16.2614	0.765466
1.34	14.2424	6.3972	11.401	10.9702	6.13869	15.1589	0.43073
1.36	14.3635	2.60028	3.70934	3.70934	3.93677	21.9556	0.701431
1.38	14.4847	1.7754	2.50328	2.50328	4.60348	20.1274	0.514685
1.4	14.6058	2.91157	3.42728	2.91157	3.42084	18.6025	0.729325
1.44	14.8482	2.57172	3.08607	3.08607	3.60041	19.7522	0.727393
1.48	15.0905
1.52	15.3328	2.89737	3.79419	2.89737	4.10975	18.9536	1.15779
1.6	15.8175
1.68	16.3021	2.01262	2.51577	3.01893	3.66302	17.8662	0.711568
1.76	16.7868
1.84	17.2714	2.51799	3.3747	2.94635	5.68274	18.6473	0.605783
1.92	17.7561
2	18.2407	2.64426	2.64426	2.64426	4.32399	16.8392	0
2.08	18.7253
2.16	19.21	3.14703	3.99218	4.48013	5.89958	18.9761	0.48795
2.24	19.6946
2.32	20.1793	3.39156	4.10403	3.96904	6.21886	19.8093	0
2.4	20.6639
2.48	21.1486	1.61867	2.27949	2.27949	5.36852	16.9048	0.660819
2.56	21.6332
2.64	22.1179	7.62391	8.80242	7.37983	3.72678	19.7317	0
2.72	22.6025
2.8	23.0872	2.6842	3.29734	3.29734	5.1664	20.7731	0.613139
2.88	23.5718
2.96	24.0565	2.1324	2.1324	2.64471	6.10102	20.3921	0
3.04	24.5411
3.12	25.0258	2.08721	2.69411	2.26497	5.5623	18.9311	0
3.2	25.5104
3.28	25.9951	2.68222	2.68222	2.68222	4.73221	18.9107	0
3.36	26.4797
3.44	26.9644	3.00917	4.01505	3.43431	4.96191	19.3465	0
3.52	27.449
3.6	27.9337	4.37643	5.22234	4.62419	5.19262	20.6654	0
3.68	28.4183
3.76	28.903	2.1256	2.74817	2.1256	4.5324	22.0638	1.07833
3.84	29.3876
3.92	29.8723	2.83678	3.44368	2.70038	5.02517	18.8876	0
4	30.3569
4.08	30.8415
4.16	31.3262	0.739221	1.26193	1.26193	4.46602	20.1956	0.739221
4.24	31.8108
4.32	32.2955
4.4	32.7801	2.45375	2.97504	2.60643	4.81992	20.5767	0.521286
4.48	33.2648
4.56	33.7494
4.64	34.2341	2.05818	3.13338	2.59578	5.40581	21.1146	0
4.72	34.7187
4.8	35.2034
4.84	35.4457	7.14847	9.19945	6.59373	6.44007	15.4321	0.618392
4.88	35.688
4.92	35.9304
4.96	36.1727	8.05847	10.4771	7.5339	6.85728	16.0745	0
5	36.415
5.04	36.6573
5.12	37.142	2.71989	3.24047	2.08232	4.37449	17.0318	0
5.2	37.6266
5.28	38.1113
5.36	38.5959	3.22846	3.97434	4.12881	3.86306	20.0096	0.527413
5.46	39.2017
5.52	39.5652
5.6	40.0499	1.16445	1.74667	2.32889	5.0921	19.4414	0.823387
5.68	40.5345
5.76	41.0192
5.84	41.5038	1.94415	2.46508	2.98601	3.60281	20.6347	0
5.92	41.9885
6	42.4731
6.08	42.9577	4.23504	4.97026	3.71517	3.31949	16.5037	0
6.16	43.4424
6.24	43.927
6.32	44.4117	2.50851	3.07739	1.3734	4.12163	19.1255	0
6.4	44.8963
6.48	45.381
6.56	45.8656	2.92454	5.24621	4.72025	4.00553	21.681	0.525952
6.64	46.3503
6.72	46.8349
6.8	47.3196	1.22628	2.5973	1.98416	3.52222	17.4165	0.86711
6.88	47.8042
6.96	48.2889
7.04	48.7735	3.03828	3.77549	3.03828	2.96633	16.9423	0.521286
7.12	49.2582
7.2	49.7428
7.28	50.2275	7.91201	11.283	9.35074	5.9651	15.3315	0.476731
7.36	50.7121
7.44	51.1968
7.52	51.6814	3.74455	4.7479	3.16527	5.18063	19.1274	0.579284
7.6	52.1661
7.68	52.6507
7.76	53.1354	2.68061	3.56623	4.07754	5.81057	20.7144	0
7.84	53.62
7.92	54.1047
8	54.5893	2.64509	3.24431	2.39689	4.01821	17.7306	0.847427
8.08	55.0739
8.16	55.5586
8.24	56.0432	3.12772	3.649	3.12772	5.00556	20.5988	0
8.32	56.5279
8.4	57.0125	4.09545	4.88479	4.32664	5.51113	22.5963	0
8.48	57.4972
8.56	57.9818
8.64	58.4665	2.0509	2.0509	1.48835	3.93781	20.7369	0
8.72	58.9511
8.8	59.4358
8.88	59.9204	1.80308	2.5423	2.01959	4.49651	21.8399	0
8.96	60.4051
9.04	60.8897
9.12	61.3744	1.81818	1.81818	1.36364	3.94598	18.4219	0
9.2	61.859
9.28	62.3437
9.36	62.8283	3.7501	5.01839	3.76836	6.6601	17.1425	0.51778
9.44	63.313
9.52	63.7976
9.6	64.2823	3.15024	3.85912	3.74647	4.22365	19.8579	0
9.68	64.7669
9.76	65.2516
9.84	65.7362	2.1986	2.97592	3.75324	4.1132	19.9728	0
9.92	66.2209
10	66.7055
10.04	66.9478	5.16568	6.19779	5.16568	4.79322	19.4986	0
10.08	67.1901
10.12	67.4325
10.16	67.6748	3.70989	4.49115	2.58552	5.26711	17.5226	0
10.2	67.9171
10.24	68.1594
10.28	68.4018	5.81181	6.60779	3.63675	3.81737	14.7998	0.649913
10.32	68.6441
10.36	68.8864
10.4	69.1287	3.91972	4.64969	3.46042	5.93262	18.4746	0.42145
10.44	69.3711
10.48	69.6134
10.52	69.8557	8.4652	13.1167	11.3487	6.53129	15.6196	0
10.56	70.098
10.6	70.3404
10.64	70.5827	5.46712	9.00265	7.40137	6.38031	13.7803	0
10.68	70.825
10.72	71.0673
10.76	71.3097	3.18669	4.34604	2.79061	5.38221	18.7908	0
10.8	71.552
10.84	71.7943
10.88	72.0366	6.51332	8.90918	7.68013	6.88852	20.0352	0
10.92	72.279	6.9097	8.66924	7.33736	6.77288	21.7682	0
10.96	72.5213	15.0474	19.7467	14.1326	5.12107	11.1985	0
11	72.7636	14.9925	20.4842	16.6723	4.50115	9.68871	0
11.04	73.0059	15.5609	20.8766	16.7309	4.79474	10.4547	0
11.08	73.2482	15.5434	20.6324	16.4315	3.75765	9.87903	0.354441
11.12	73.4906	15.9546	22.0338	18.4251	4.62085	9.77009	0
11.16	73.7329	16.0815	21.3876	17.6403	4.64035	10.0854	0
11.2	73.9752
11.24	74.2175	12.6092	17.8138	15.7445	4.64331	11.3671	0.354663
11.28	74.4599
11.32	74.7022	15.2054	21.5508	18.3487	4.56757	9.78108	0.328976
11.36	74.9445
11.4	75.1868	13.9529	20.842	17.7718	4.335	9.52204	0
11.44	75.4292
11.48	75.6715	12.0763	18.8857	17.6637	4.31482	10.4418	0
11.52	75.9138
11.56	76.1561	10.0474	17.1636	16.22	4.78866	12.2081	0
11.6	76.3985	7.78517	13.4419	11.617	4.77668	14.1452	0
11.64	76.6408	7.2797	11.9905	10.6786	6.38898	15.9697	0
11.68	76.8831	6.93126	10.6593	9.09139	5.46214	18.0029	0.465999
11.72	77.1254
11.76	77.3678	5.55929	9.97388	8.78387	3.87288	15.9217	0.449013
11.8	77.6101
11.84	77.8524	5.79414	9.70906	8.70655	4.7249	16.6498	0.708881
11.88	78.0947
11.92	78.3371	6.30393	9.31562	8.44807	5.60492	19.8484	0
11.96	78.5794
12	78.8217	7.70675	10.7928	8.7046	5.92202	19.3081	0.727393
12.04	79.064
12.08	79.3063	8.3765	12.1128	11.96	6.07464	19.8052	0
12.12	79.5487	12.4876	15.8745	10.9959	3.70179	11.7193	0.353112
12.16	79.791	13.76	18.9053	14.0606	3.67049	8.80499	0
12.2	80.0333	12.2983	16.4448	11.6134	2.31525	8.52621	0
12.24	80.2756	13.2387	19.0665	15.0251	3.19738	10.137	0.380143
12.28	80.518	12.7305	18.2307	14.7931	3.84525	7.10293	0
12.32	80.7603	12.5538	19.5288	17.176	2.88459	8.12712	0
12.36	81.0026	12.5712	18.2413	15.1724	3.46026	7.42634	0
12.4	81.2449	15.0375	21.283	18.342	3.85274	9.25597	0.350715
12.44	81.4873
12.48	81.7296	13.3039	18.9697	17.8192	3.69364	8.06539	0
12.52	81.9719
12.56	82.2142	13.7945	19.573	17.9824	3.07665	5.89988	0
12.6	82.4566
12.64	82.6989	4.08177	5.89024	5.83173	0.912648	2.16169	0
12.68	82.9412
12.72	83.1835	3.57277	4.72599	4.42023	1.06117	1.47546	0
12.76	83.4259
12.8	83.6682	11.3197	18.2357	19.2548	3.6704	9.44076	0
12.84	83.9105
12.88	84.1528	8.71143	16.5668	16.656	4.00162	9.67837	0
12.92	84.3952
12.96	84.6375	5.32709	11.0105	10.6613	3.9592	8.61541	0
13	84.8798	7.48565	13.186	11.9317	5.29512	11.2384	0
13.04	85.1221	6.98064	10.4913	7.85389	7.12663	16.7516	1.29641
13.08	85.3644	5.99977	10.7185	8.45904	7.78209	17.9794	0.480015
13.12	85.6068	6.353	8.8491	6.48476	6.93296	19.192	0.789337
13.16	85.8491	7.5132	11.2961	10.6337	6.75066	19.4721	0.835512
13.2	86.0914	8.50009	12.2513	11.3485	6.49076	21.2989	0.521286
13.24	86.3337	8.21628	11.7518	9.84731	5.18701	21.5003	0.51031
13.47	87.7271	7.11178	9.44274	9.77588	5.45894	20.724	0.508657
13.53	88.0906	5.6495	8.75863	8.23502	4.79527	17.9531	0.57735
13.61	88.5752	5.73317	8.31107	9.20053	4.5136	20.3688	0

## Sheet: Valle di Castiglione
metri	Age Quest (ka BP)	boreal forest	temperate forest	warm-temperate forest	tundra	grassland and dry shrubland	desert
0.5	3.7411	10.6699	15.4627	19.2189	8.5952	11.3325	0
0.6	4.03862	13.2498	17.5392	20.9494	9.46729	10.7472	0
0.7	4.33614	10.9411	15.7309	17.7851	8.78011	11.7466	0
0.8	4.63366	12.0299	16.4232	19.8233	9.37078	13.355	0
0.9	4.93118	12.6746	17.0058	19.5414	9.58323	10.0548	0
0.98	5.1692	8.35822	13.2326	17.6578	6.53406	11.295	0
1.1	5.52622	14.1504	17.5756	19.4827	7.97265	13.9216	0
1.2	5.82374	11.9212	15.3672	15.3672	6.12835	10.3404	0
1.35	6.27002	11.981	18.3634	19.9239	6.04432	10.4334	0
1.5	6.7163	11.6339	16.1923	18.5075	5.04943	12.3559	0
1.6	7.01382
1.7	7.31134	11.5981	16.5802	17.7029	4.91593	9.93441	0
1.9	7.90638
2	8.2039	8.88866	11.6419	12.0127	3.87592	8.4214	0
2.1	8.50142
2.2	8.79894	7.68654	12.0644	12.8637	4.24402	11.69	0
2.3	9.09646	8.7616	12.4686	13.3298	5.92785	14.1743	0
2.4	9.39398	6.2501	9.24739	9.82519	5.50535	16.9787	0
2.5	9.6915	10.6823	14.6278	15.6114	6.31279	15.8426	0
2.6	9.98902	6.28098	9.48241	9.74352	4.20451	14.9144	0.483368
2.7	10.2865	7.51064	9.64485	10.6419	4.46057	14.0919	0.455016
2.8	10.5841	6.6844	9.08146	9.41706	3.70514	15.4091	0
2.9	10.8816	7.36765	10.1186	10.37	4.08557	15.4087	0
3	11.1791	12.2681	16.0622	17.1249	6.81039	15.7312	0
3.1	11.4766	10.5937	14.6195	15.6001	5.87223	15.2253	0
3.2	11.7741	10.0034	13.5336	14.3388	6.09512	14.8108	0
3.3	12.0717	9.30649	12.3501	12.5824	5.20814	15.7796	0.398726
3.4	12.3692	5.50397	7.63841	7.63841	4.12326	17.6723	0
3.5	12.6667	8.8868	11.6248	12.2472	6.45116	14.0039	0
3.6	12.9642	6.13884	8.01297	8.34572	3.89444	15.0897	0
3.7	13.2617	3.3548	5.03868	5.4575	6.08955	18.0375	0.700713
3.8	13.5593	1.83597	2.44796	2.44796	4.85198	17.5889	0
3.9	13.8568	7.60718	9.68142	9.83268	2.8463	11.2854	0
4	14.1543	3.98701	5.24093	3.75727	4.76707	16.0858	0
4.1	14.4518	4.28945	6.10016	6.10016	4.5893	16.528	0
4.19	14.7196	5.27226	5.8667	5.8667	2.22418	13.5251	0
4.45	15.4931
4.55	15.7907	5.42228	5.42228	5.42228	3.88514	14.3215	0
4.8	16.5345
5	17.1295	2.08833	2.33919	2.08833	1.53002	8.63891	0
5.2	17.7245
5.41	18.3493	0	0.56888	0.56888	1.27205	11.1449	0
5.55	18.7659
5.9	19.8072	3.01855	3.58198	3.01855	3.53549	13.8015	0
6.05	20.2535
6.15	20.551	3.41488	4.0516	4.0516	5.82545	19.0688	0
6.4	21.2948
6.6	21.8898	1.48413	2.14785	2.14785	2.20132	16.0785	0
6.8	22.4849
7.05	23.2287	0.633724	0.633724	0.633724	2.10183	15.9258	0
7.2	23.6749
7.4	24.27	1.41563	1.41563	1.41563	2.32612	15.1064	0
7.6	24.865
7.8	25.4601	0.888523	1.1847	1.1847	3.01664	12.2063	0
8	26.0551
8.2	26.6501	3.25396	3.79628	2.71163	3.34196	15.7681	0
8.4	27.2452
8.6	27.8402	1.22782	1.63709	1.22782	3.78422	11.401	0
8.7	28.1377
9.1	29.3278	1.21268	1.64142	1.94459	3.76223	12.0519	0
9.2	29.6253
9.4	30.2204	1.36223	1.81631	1.36223	4.89266	12.0909	0
9.6	30.8154
9.85	31.5592	0.766606	1.25709	1.25709	2.92326	8.28386	0
10	32.0055
10.15	32.4518	0.620174	0.620174	0.620174	3.50823	15.9644	0
10.37	33.1063
10.6	33.7906	1.04973	1.95882	2.48368	5.03432	15.7607	0
10.8	34.3857
11	34.9807	0.889108	1.5178	1.5178	3.55643	18.1126	0
11.2	35.5757
11.4	36.1708	5.91047	7.32626	5.565	5.92923	14.0942	0
11.64	36.8848
11.75	37.2121	0	0	0	4.44938	14.6259	0
12.05	38.1047
12.2	38.5509	1.24035	1.6538	1.24035	4.04145	15.4161	0
12.4	39.146
12.6	39.741	2.68626	3.5675	2.8762	1.77076	7.03374	0
12.8	40.3361
13	40.9311	3.04226	4.10375	3.573	4.60747	17.9165	0
14.09	44.1741
14.22	44.5608	2.22911	2.22911	1.11456	4.97549	19.2105	0
14.4	45.0964
14.64	45.8104	2.69975	2.69975	2.1598	3.7251	14.652	0
14.75	46.1377
15.1	47.179	2.10467	2.48318	1.56938	3.5507	15.2107	0.378506
15.25	47.6253
15.5	48.3691	0.387783	0.936192	0.936192	2.82311	13.2423	0
15.6	48.6666
15.9	49.5592	3.02359	3.97403	3.67347	2.9677	11.2094	0
16.15	50.303
16.3	50.7493	1.21491	2.70287	2.70287	4.54423	17.7407	0
16.4	51.0468
16.7	51.9393	3.74085	4.56563	3.98242	3.29914	14.3917	0
16.8	52.2369
17.1	53.1294	4.23784	4.6627	3.46102	3.97949	15.3163	0
17.2	53.4269
17.5	54.3195	10.1581	11.9414	9.46382	6.4374	14.3974	0
17.74	55.0335
18.3	56.6997	7.06769	9.17481	8.68382	4.61859	11.7811	0
18.4	56.9972
18.7	57.8897	2.32495	3.72819	2.56571	2.46598	18.244	0
18.8	58.1873
19.1	59.0798	3.5363	4.2518	2.95209	3.27511	13.8377	0
19.3	59.6749
19.5	60.2699	4.59344	5.83956	4.725	5.95769	15.4919	0
19.6	60.5674	6.17546	7.64589	5.08436	3.53126	10.9786	0
19.9	61.46	10.4147	13.4745	12.254	5.37359	12.6666	0
20.02	61.817	11.2856	14.5876	14.6902	5.06668	12.7392	0
20.3	62.6501	5.10812	6.87819	5.64459	3.91247	17.6151	0
20.7	63.8401	2.4394	2.4394	2.01454	0.849719	8.32157	0.424859
21.3	65.6253	5.55666	5.55666	4.78969	2.0292	18.9783	0
21.5	66.2203	4.70947	5.6139	4.70947	1.80886	12.5212	0
21.8	67.1129	3.49927	3.49927	3.49927	1.42857	17.5203	0
22.29	68.5707	4.5824	5.22789	4.5824	2.08887	16.1181	0.645497
26.1	79.9062
26.3	80.5013	4.44518	5.40447	3.26457	1.1077	13.2232	0
26.5	81.0963	3.8565	4.94932	4.29102	1.22093	5.74703	0
26.68	81.6318	6.58305	8.0165	6.23326	1.30542	6.82387	0
27.3	83.4765	12.2637	13.9199	11.095	2.8249	4.43652	0
27.5	84.0715	13.075	14.3032	11.8461	3.46155	8.00487	0
27.7	84.6665	13.6272	15.3101	13.8005	4.45065	7.42128	0
27.9	85.2616	10.6868	12.9851	11.5279	2.85613	11.5902	0
28.1	85.8566	3.64292	4.92328	4.2831	2.56074	18.2678	0
28.6	87.3442	2.10042	2.10042	2.10042	0.857493	15.1876	0
29	88.5343	3.97444	3.97444	2.14423	1.5162	15.641	0
29.2	89.1293	4.88266	4.88266	3.95015	0.932505	18.7865	0
29.4	89.7244	1.83726	1.83726	1.83726	0	16.9127	0
29.63	90.4087
30	91.5095	6.42818	8.1105	7.54973	1.76434	13.7638	0
30.2	92.1045	5.54545	6.90448	5.87715	1.02733	7.27988	0
30.6	93.2946	11.4402	15.525	13.8104	2.02214	6.50018	0
30.9	94.1872	9.14725	11.4616	11.0177	1.50635	5.36723	0
31.1	94.7822	9.25197	11.8616	10.4964	1.56232	4.8317	0
31.17	94.9905	9.73853	13.0527	12.9913	1.96082	6.09715	0
31.5	95.9723	8.84245	11.4438	10.2381	2.24304	4.34673	0
31.7	96.5673
31.9	97.1624	17.1144	22.2336	20.7257	2.44876	9.14081	0
32.1	97.7574
32.3	98.3525	13.962	19.9722	19.8865	3.91665	10.8603	0
32.5	98.9475
33.37	101.536	16.5867	20.6979	20.4454	4.61867	11.4895	0
33.5	101.923	13.8294	20.8418	18.9465	3.92584	9.76447	0
33.75	102.666	10.0137	14.0885	12.5958	1.79426	14.2642	0
34	103.41	10.5228	14.6908	12.3415	3.10975	14.2053	0
34.25	104.154	9.58509	13.6288	12.5221	1.82237	14.6027	0
34.5	104.898	14.422	19.9976	20.4619	3.64447	11.626	0
34.75	105.642	16.7655	21.2089	20.3436	3.37377	10.1679	0
35	106.386	14.463	18.6401	18.7767	3.5264	9.69372	0
35.25	107.129	11.6083	14.5619	11.9838	1.94071	10.7628	0
35.5	107.873	6.59718	9.50934	9.2618	1.33631	13.412	0.597614
35.7	108.468	2.86715	4.84519	3.75626	1.25739	15.7897	0
36.95	112.187	3.61012	6.16918	6.16918	2.34296	17.126	0
37.23	113.02	6.41223	7.64627	6.22133	1.23404	12.9189	0
37.5	113.824	15.0449	17.2135	16.8708	3.40521	7.59418	0
37.6	114.121	10.1598	12.0653	17.5455	1.98065	12.5131	0
37.75	114.567	11.7397	13.007	15.9451	2.86921	10.3218	0
37.875	114.939	8.97521	11.9839	16.4437	2.84762	14.5438	0
38	115.311	10.562	13.0241	14.5893	3.59988	11.6686	0
38.125	115.683	7.6305	11.3082	15.2023	3.02627	15.7719	0
38.25	116.055	8.23003	9.47288	11.4714	3.14073	11.6589	0
38.375	116.427	7.21442	8.64977	12.1466	2.17522	16.395	0
38.5	116.799	7.11608	8.98586	11.3237	2.26037	12.169	0
38.71	117.423	8.64078	11.0012	13.123	3.76352	12.1011	0
39.6	120.071	7.84603	10.3025	12.4264	2.65547	10.638	0
39.75	120.518	11.6596	14.7237	20.3688	5.25353	15.7968	0
39.85	120.815	12.1326	14.9465	18.1325	7.70107	16.0928	0
39.95	121.113	11.7689	14.5759	18.4861	7.65488	16.0685	0
40.05	121.41	10.8956	14.1209	17.9824	6.32116	15.9724	0
40.15	121.708	11.4111	14.3624	18.138	6.81177	17.6151	0
40.25	122.005	10.7782	13.5452	17.2951	6.06713	17.4665	0
40.52	122.809	9.75275	12.9141	15.5442	6.13573	16.5684	0
40.62	123.106	9.19073	12.3427	16.5591	5.14352	16.4733	0
40.75	123.493	10.7661	12.5251	14.959	4.5937	11.2793	0
41	124.237	8.15978	9.84369	10.1689	5.56495	12.2557	0
41.125	124.609	7.9268	11.6528	12.6075	3.60766	11.056	0
41.25	124.981	5.74027	7.26525	8.79024	3.04897	14.44	0.482243
41.375	125.352	5.76244	8.79806	10.5507	2.60796	12.7888	0
41.5	125.724	3.54329	5.48709	6.79478	1.41955	14.1366	0
41.75	126.468	6.48859	8.24639	8.02686	1.59	13.4702	0.529999
42.32	128.164	4.16665	6.01041	6.40004	2.03767	13.2353	0.532246
42.5	128.7	1.65295	3.74378	5.02415	1.65295	13.7726	0
42.73	129.384	4.74152	6.69732	6.69732	2.32579	13.0204	0
43	130.187	5.02964	7.02168	5.23994	3.96392	15.7765	0
47.5	143.576	4.67442	4.67442	3.39667	4.98057	12.6354	0
48.1	145.361	12.1238	13.7933	12.5207	3.9849	12.0173	0
48.3	145.956	3.89538	4.45051	3.32641	3.31671	10.3766	0
48.5	146.551	3.57601	4.17221	3.08922	2.69466	9.94737	0
48.75	147.294	4.70689	5.49305	4.53251	3.37086	10.7297	0
49	148.038	3.60461	4.02569	3.00912	2.4189	11.757	0.421076
49.25	148.782	4.24777	5.62342	5.12295	3.43923	8.80161	0
49.5	149.526	4.79967	6.35431	6.03489	3.41769	12.0444	0
49.75	150.27	2.36127	3.27893	2.36127	2.88674	12.6369	0

## Sheet: Monticchio
sample_name	New chron. (yr BP) May 2005	depth (cm) (Komposite1 depths May 2005)	Age Quest (ka BP)	boreal forest	temperate forest	warm-temperate forest	tundra	grassland and dry shrubland	desert
P 90-0.5	58.6854	0.5	2.10925	11.4038	20.1246	18.1844	8.75043	13.6416	0
P 90-4.5	63.1798	2	2.1307	13.8622	22.6461	20.3843	9.2557	11.3502	0
P 90-7.5	66.5506	4	2.1593	13.6518	21.0392	19.5726	10.3972	12.8864	0
E1-o-5	86.7753	5	2.1736	12.0756	21.336	22.4831	8.30065	10.2159	0
E1-o-25	402.654	25	2.4596	11.7195	20.0009	20.9722	9.48627	14.2452	0
E1-o-45	734.918	45	2.7456	12.008	20.537	20.537	9.57732	12.4341	0
K1-o-4	753.391	46.546	2.76771	12.5983	22.0354	21.9624	5.6365	8.90852	0
K1-o-12	829.067	52.8796	2.85828	11.0622	20.5802	22.2345	6.11597	10.0003	0
K1-o-20	886.768	57.7088	2.92734
K1-o-28	913.245	59.9247	2.95902	13.6787	22.1548	22.6492	7.40291	9.07763	0
E1-o-60	914.144	60	2.9601
K1-o-36	937.685	64.3775	3.0227	12.1638	21.4462	22.9898	7.06967	9.60378	0
E1-o-65	941.032	65	3.0316
K1-o-44	969.336	67.5154	3.06757
K1-o-52	1033.69	73.2345	3.14935	11.4016	19.9948	21.6974	7.44427	11.276	0
K1-o-60	1110.15	80.0296	3.24652
K1-o-68	1179.03	86.1506	3.33405
K1-o-76	1206.84	88.6224	3.3694	13.041	21.2274	22.5747	8.69133	13.0348	0
E1-o-90	1222.34	90	3.3891
K1-o-84	1232.99	91.6455	3.41263
K1-u-4	1300.88	102.137	3.56266	13.6249	23.9145	25.5381	7.29065	9.29349	0
E1-u-5.5	1312.93	104	3.5893
K1-u-12	1377.54	108.739	3.65707
K1-u-20	1440.16	113.333	3.72276	12.0623	22.0723	23.3913	7.47959	8.85249	0
K1-u-25	1441	113.394	3.72364
E1-u-25.5	1585.58	124	3.8753
E1-u-35.5	1751.59	134	4.0183	13.1734	23.0731	22.1473	6.50355	6.01386	0
K1-u-36	1836.43	144.796	4.17268
E1-u-55.5	1908.75	154	4.3043
K1-u-44	1945.82	158.992	4.37568	13.7207	23.2559	24.4548	6.60234	8.77639	0
K1-u-52	2104.47	180.352	4.68113
D1-o-10	2105.58	180.5	4.68325
E1-u-85.5	2185.89	184	4.7333	13.3249	23.9806	24.7374	6.82502	10.8431	0
E1-u-95.5	2352.44	194	4.8763
K1-u-60	2393.56	199.12	4.94952
K1-u-68	2519.91	214.853	5.17449	17.6091	25.8053	25.8625	7.32103	7.32951	0
D1-o-50	2565.26	220.5	5.25525
D1-o-55	2648.15	225.5	5.32675	14.9249	24.9395	25.7578	7.651	8.54952	0
K1-u-76	2823.34	236.031	5.47734	18.0057	24.8008	25.6139	6.39066	9.44697	0
D1-o-75	2980.86	245.5	5.61275	18.0406	27.3201	27.253	7.10227	8.10111	0
K1-u-84	3132.22	254.584	5.74265	14.8912	25.0725	24.3889	7.12172	5.37552	0
D1-o-95	3314.12	265.5	5.89875	17.3291	26.0386	25.785	6.40833	10.8518	0
K1-u-92	3424.56	273.271	6.00988	15.7157	26.3607	25.9803	7.01152	6.15137	0
D1-u-5	3456.23	275.5	6.04175	17.537	26.8678	25.4234	7.5733	7.54945	0
D1-u-45	4017.55	315.5	6.61375	14.6452	25.4672	24.8841	5.97279	10.892	0
K2-o-12	4042.59	319.335	6.66859
D1-u-50	4050.19	320.5	6.68525
K2-o-20	4175.06	330.665	6.83061	15.1117	24.8659	23.4853	7.7971	5.68339	0
K2-o-28	4257.44	337.371	6.9265
K2-o-36	4331.02	343.36	7.01215
mf 93-218	4341.52	344.215	7.02438	14.4342	25.8285	23.7015	4.10975	4.28614	0
K2-o-44	4445.67	352.693	7.14561
K2-o-52	4581.18	363.724	7.30335
K2-o-60	4662.33	370.33	7.39782	15.459	26.0055	25.6653	5.85594	7.98756	0
K2-o-68	4809.95	382.346	7.56965
K2-o-76	4915.69	390.954	7.69274
mf 93-228	4942.83	393.163	7.72434	15.473	24.8315	22.7288	5.25657	3.17856	0
K2-o-84	5013.21	398.893	7.80626
K2-o-92	5143.98	409.537	7.95848
D2-o-50	5333.94	425	8.1796	15.2407	25.2063	22.5688	8.27916	6.22291	0
K2-o-2	5344.88	425.711	8.18976
K2-u-10	5500.13	435.792	8.33393
K2-u-18	5600.58	442.315	8.4272	13.6065	23.5792	23.2169	7.42303	5.80208	0
mf 93-238	5639.68	444.854	8.46352
K2-u-26	5705.48	449.127	8.52462
K2-u-34	5815.5	456.271	8.62678	12.787	23.6322	23.3961	7.74404	7.12132	0
K2-u-42	5941.52	464.455	8.7438
K2-u-50	6079.28	473.401	8.87173
L3-u-10	6164.61	478.942	8.95097	11.8038	24.4763	22.4603	4.33224	5.62734	0
K2-u-58	6223.61	482.773	9.00575
K2-u-66	6355.08	491.311	9.12784
L3-u-26	6391.93	493.704	9.16206	14.3893	25.4332	24.1755	6.05972	5.5153	0
K2-u-74	6498.96	500.653	9.26144
L3-u-34	6510.98	501.434	9.27261
mf 93-251	6517.69	501.87	9.27884	14.9761	22.791	22.7535	6.08885	5.5035	0
K2-u-82	6641.28	509.896	9.39361
L3-u-42	6647.4	510.293	9.39928
mf 93-254	6660.38	511.136	9.41134	14.4727	23.444	21.5307	6.16774	4.80352	0
K2-u-90	6795.35	519.9	9.53667
D2-u-50	6804.59	520.5	9.54525
L3-u-50	6837.72	521.922	9.56559	13.9097	24.0222	22.3882	6.35395	6.76626	0
K2-u-96	6905.34	524.824	9.60709
L3-u-58	6996.34	528.73	9.66294
mf 93-264	6996.71	528.746	9.66316	14.5857	23.4676	22.9812	6.72622	4.63516	0
L3-u-66	7155.92	535.579	9.76088
mf 93-274	7290.83	541.369	9.84367	15.6804	26.0002	23.363	3.87298	4.1259	0
L3-u-74	7308.73	542.137	9.85467
mf 93-284	7777.78	562.268	10.1425
L3-u-80	7809.41	563.626	10.1619	11.0077	23.7474	20.9458	2.69582	3.99748	0
L3-u-82	7873.97	566.397	10.2016
mf 93--294	8297	584.552	10.4612
L4-o-6	8391.09	588.591	10.5189	13.9681	25.9283	24.8383	4.39723	6.18269	0
mf 93--300	8622.91	598.54	10.6612
L4-o-14	8672.63	600.674	10.6917
L4-o-22	8929.47	611.697	10.8494	14.8908	26.0821	24.6157	4.57251	3.7893	0
mf 93--310	9064.33	617.385	10.9307
D3-o-50	9064.67	617.5	10.9323	11.8082	24.5383	24.0879	5.5285	6.61909	0
L4-o-30	9079	618.259	10.9432
L4-o-38	9280.31	628.912	11.0955
L4-o-46	9463.71	638.618	11.2343	13.8268	24.779	23.6927	4.70176	4.10629	0
mf 93-323	9507.39	640.929	11.2674	12.2393	24.1057	23.5618	2.82633	3.93948	0
L4-o-52	9590	645.301	11.3299	12.8203	25.2177	24.2905	5.5662	3.4653	0
mf 93-335	9698.11	651.023	11.4117	12.1986	24.1504	24.3849	3.62506	4.58559	0
L4-o-62	9732.16	652.825	11.4375	12.9106	24.5583	24.0412	6.43968	5.23342	0
mf 93-345.5	9818.21	657.379	11.5026	12.2862	24.0388	23.278	3.59829	2.53427	0
L4-o-70	9830.92	658.051	11.5122	12.6229	25.0542	24.8412	5.88496	5.45284	0
L4-o-78	9928.31	663.206	11.5859	12.254	23.9966	23.4436	4.6661	6.3251	0
mf 93-355	9929.13	663.249	11.5866	12.3709	23.0716	22.5177	2.28358	2.57304	0
mf 93-365.0	10033.9	668.791	11.6658	10.723	22.6694	22.6694	1.81568	4.27289	0
L4-o-86.0	10086.2	671.56	11.7054	10.8596	21.8738	21.3346	3.09569	5.30614	0
mf 93-375.0	10135.5	674.172	11.7428	10.0949	21.2001	20.9586	1.01015	3.39921	0
mf 93-385.0	10234.5	679.407	11.8176	9.06865	21.2175	20.4232	0.561656	2.80828	0
L4-o-94.0	10268.5	681.211	11.8434	11.6854	22.4224	21.8711	3.96737	6.50109	0
mf 93-395.0	10334.2	684.684	11.8931	9.29816	21.186	21.4264	0.82061	2.98617	0
mf 93-405.0	10443.2	690.454	11.9756	8.65325	20.2268	20.2268	0	4.65778	0
L4-u-4.0	10513	694.15	12.0284	9.62098	19.6159	19.6159	3.54584	4.28601	0
mf 93-416.0	10560.5	696.664	12.0644	10.8995	22.1196	21.3111	1.38011	1.38011	0
mf 93-424.0	10640.5	700.895	12.1249	11.6209	20.6407	20.0624	0.578315	4.61188	0
L4-u-12.0	10697.9	703.933	12.1683	10.4305	20.9502	20.9502	4.64654	5.9907	0
mf 93-435.0	10750.4	706.711	12.2081	11.0532	19.6409	18.7535	0	2.8615	0
mf 93-475.0	10838.3	711.362	12.2746	8.95512	16.7095	16.1757	0	5.15879	0
mf 93-445.0	10850.2	711.992	12.2836	10.1155	20.2807	19.3826	0	3.21308	0
L4-u-20.0	10880.9	713.619	12.3068	8.51009	20.3141	20.3141	3.02313	5.22418	0
mf 93-455.0	10945.1	717.016	12.3554	9.27101	18.3318	19.3368	0.580259	5.37094	0
mf 93-485.0	10980.1	718.867	12.3819	9.55711	19.7502	19.165	0.585206	6.42752	0
D3-u-50.0	10982.6	719	12.3838	8.45565	19.1142	18.1508	5.13436	8.07034	0
mf 93-465.0	11037.5	721.645	12.4216	9.68059	20.1114	20.5138	0.777322	3.50556	0
L4-u-28.0	11050.4	722.267	12.4305	7.96036	18.4551	18.4551	3.42371	6.40804	0
mf 93-495.0	11121.9	725.716	12.4798	10.1551	20.2971	20.2971	0.815139	2.96626	0
L4-u-36.0	11217.3	730.313	12.5456	7.56637	18.1812	18.1812	4.27107	6.55569	0
mf 93-510.0	11334.7	735.971	12.6265	10.7318	21.2693	20.7146	1.4676	4.26318	0
D3-u-67.5	11345.6	736.5	12.6341	6.4021	16.8476	15.8093	7.39917	12.0351	0
L4-u-44.0	11392.7	737.881	12.6538	5.07028	15.456	15.456	4.24785	7.04971	0
mf 93-520.0	11476.5	740.337	12.6889	7.965	18.1017	17.2933	0.571662	3.80171	0
D3-u-72.0	11499.1	741	12.6984	5.91066	17.4835	15.9629	6.93664	13.004	0.537603
mf 93-530.0	11618.3	745.648	12.7649	7.13668	16.5867	16.5867	0.801927	4.30716	0
D3-u-78.0	11653	747	12.7842	7.52786	17.7955	16.0047	8.28979	11.1047	0
L4-u-52.0	11659.9	749.174	12.8153	5.96045	16.3657	16.3657	4.32034	6.88545	0
D3-u-83.5	11668.8	752	12.8557	7.90432	18.0146	16.5177	7.94816	14.2842	0
B4-u-45.0	11753.4	757	12.9272	5.12044	14.8608	12.4489	8.8338	13.3481	0
mf 93-540.0	11760.1	757.459	12.9338	6.97918	17.0353	17.0353	0.547176	4.18964	0
B4-u-49.0	11812.5	761	12.9844	7.1059	16.4109	13.8008	9.84307	12.6706	0.493264
mf 93-550.0	11902	764.667	13.0368	5.45629	14.4102	14.4102	0.571662	4.27529	0
B4-u-53.0	11910.1	765	13.0416	7.37209	14.2063	11.1062	9.93658	13.7507	0.509647
B4-u-57.0	11995.3	769	13.0988	6.66074	14.7348	11.7558	9.57501	14.7752	0.465242
B4-u-61.0	12110.4	773	13.156	4.78599	12.8079	10.1383	8.69309	11.481	0.479463
mf 93-565.0	12114.7	773.15	13.1581	3.29041	12.7187	12.7187	0	3.8272	0
B4-u-64.0	12139	774	13.1703	5.61904	13.9244	11.1471	8.82619	13.5132	1.04973
D4-o-10.0	12169	776	13.1989	6.57499	14.6249	11.7586	8.30437	13.7748	0
D4-o-14.0	12180.4	779.5	13.249	7.78767	16.0657	11.8783	9.47327	14.4336	0.523424
D4-o-18.0	12190.2	784.5	13.3205	7.36034	14.7974	10.9794	9.269	12.4012	0
L4-u-60.0	12207.4	786.953	13.3555	4.93643	15.6898	15.6898	3.65963	7.96633	0
D4-o-22.0	12218.2	788.5	13.3777	7.06974	15.9143	12.5468	9.83423	10.4704	0
mf 93-572.5	12221.1	788.743	13.3811	4.0695	14.3034	14.3034	0	2.18224	0
D4-o-26.0	12266	792.5	13.4349	5.5271	14.1867	10.8822	9.85448	13.2389	0
mf 93-576.0	12270.7	793.006	13.4421	4.91814	12.6792	13.4439	0.540738	4.58231	0
L4-u-64.0	12312.8	797.543	13.507	3.9083	13.1576	13.1576	3.60975	6.57013	0
D4-o-30.0	12321.7	798.5	13.5206	9.18056	15.5868	11.171	10.4503	12.8575	0.52778
mf 93-580.0	12327.5	798.7	13.5235	4.88787	13.2391	13.2391	0.819232	2.31714	0
L4-u-68.0	12418.3	801.873	13.5689	3.89861	12.9089	12.9089	4.9099	8.43917	0
D4-o-34.0	12436.2	802.5	13.5778	6.79092	14.2812	11.3071	8.83877	12.6915	0
mf 93-590.0	12495.5	804.512	13.6066	2.86551	11.2449	11.7742	0.529256	3.4265	0
L4-u-72.0	12523.8	805.472	13.6203	2.30348	10.1602	10.1602	4.58123	9.28351	0
D4-o-38.0	12554.1	806.5	13.635	7.88784	15.2671	12.0287	8.55986	12.8338	0.69843
L4-u-76.0	12629.2	808.5	13.6637	4.00743	11.9159	11.9159	5.12626	8.19857	0
D4-o-42.0	12661.5	810.5	13.6922	6.16515	12.654	9.72952	9.61323	14.4006	0.573539
L4-u-78.0	12682	811.228	13.7027	3.11832	10.0965	10.0965	3.88233	9.65919	0
mf 93-603.0	12728.6	812.888	13.7264	3.48743	10.3893	9.80801	0.581238	2.94368	0
D4-o-46.0	12770.6	814.5	13.7494	7.16158	15.6134	13.8476	7.32275	13.0551	0.667409
L4-u-84.0	12840.2	816.858	13.7832	2.22905	9.99936	9.99936	4.33903	8.40749	0
mf 93-610.0	12854.1	817.33	13.7899	4.69484	12.3217	12.3217	0.542326	3.51112	0
D4-o-50.0	12888.7	818.5	13.8066	10.8343	19.9815	18.2444	5.95255	9.92897	0
L4-u-88.0	12945.7	820.365	13.8333	3.63078	10.7701	10.7701	4.67113	9.78992	0
mf 93-620.0	13033.4	823.237	13.8744	2.68802	10.7999	10.7999	0.537603	2.76665	0
L4-u-92.0	13051.1	823.815	13.8827	3.61395	11.1963	11.1963	5.06022	9.63119	0
mf 93-625.0	13123.1	826.17	13.9163	5.755	13.7371	13.7371	0.905357	2.33762	0
L4-u-96.0	13156.6	827.266	13.932	3.74687	11.6647	11.6647	4.75085	9.82516	0
D4-o-60.0	13194.3	828.5	13.9497	8.2609	19.0688	17.1032	5.94559	12.2211	0
mf 93-630.0	13212.8	829.052	13.9575	4.58353	13.9453	13.9453	0	2.70979	0
mf 93-635.0	13302.4	831.738	13.9959	6.68179	16.0396	16.0396	0.804518	3.33574	0
L5-o-4.0	13367.5	833.689	14.0238	5.43418	14.711	14.711	3.69611	6.39112	0
mf 93-640.0	13392.1	834.423	14.0344	5.75048	15.1246	15.1246	0	3.60547	0
L5-o-8.0	13473	836.848	14.069	5.65622	15.6818	15.6818	2.92482	6.97083	0
mf 93-645.0	13481.7	837.109	14.0728	6.02633	15.5414	15.5414	0	4.39152	0
D4-o-70.0	13528.2	838.5	14.0927	8.92176	18.3111	14.7331	8.51993	12.7501	0
mf 93-650.0	13571.4	839.794	14.1111	7.23275	16.7629	16.7629	1.23844	2.80246	0
L5-o-12.0	13578.5	840.006	14.1142	7.32084	13.4661	13.4661	5.21358	6.95173	0
mf 93-655.0	13661	842.477	14.1495	8.48153	16.2416	16.2416	0.51031	3.69599	0
L5-o-16.0	13684	843.163	14.1593	7.20556	16.6657	16.6657	4.37715	7.76985	0
mf 93-660.0	13750.7	845.161	14.1879	7.83014	15.7818	15.2245	0.78811	2.63707	0
L5-o-20.0	13789.4	846.321	14.2045	7.11157	13.3201	13.3201	8.77007	9.60254	0
D4-o-80.0	13862.2	848.5	14.2356	8.29738	16.6729	14.1121	9.95834	14.7771	0
L5-o-24.0	13894.9	849.839	14.2548	3.79628	11.1581	11.1581	6.40848	10.1162	0
mf 93-670.0	13930	851.278	14.2754	6.27881	14.0142	14.0142	0	3.20325	0
L5-o-28.0	14000.4	854.162	14.3166	3.06186	9.71322	9.71322	5.96898	9.92838	0
mf 93-675.0	14019.7	854.953	14.3279	5.18176	11.7025	11.1902	0.724524	3.51638	0
L5-o-32.0	14105.8	858.485	14.3784	4.00383	10.2992	10.2992	6.50145	10.247	0
D4-o-90.0	14106.2	858.5	14.3787	7.74861	12.2867	6.71398	11.4747	15.2239	0
mf 93-680.0	14109.3	858.652	14.3808	5.11734	11.5316	11.5316	0.534522	3.89021	0
L5-o-34.0	14158.6	861.057	14.4152	2.19154	5.40787	5.40787	7.43533	11.1926	0
mf 93-685.0	14199	863.03	14.4434	5.52542	10.1291	10.1291	0.94632	2.86077	0
L5-o-37.0	14237.7	864.92	14.4705	2.70145	6.24845	6.24845	7.19596	11.4635	0
mf 93-690.0	14288.6	867.407	14.506	2.41649	9.54571	9.54571	0	1.65049	0
L5-o-42.0	14369.5	871.357	14.5625	2.07017	4.73042	4.73042	7.23418	12.5355	0
mf 93-699.0	14450	875.286	14.6187	0.592349	3.83376	3.83376	0	3.93929	0
L5-o-47.0	14501.4	877.794	14.6545	0.789337	2.69497	2.69497	6.19013	12.7574	0
mf 93-702.0	14503.8	877.913	14.6563	1.56952	4.9584	4.9584	0.574485	3.246	0
D4-u-10.0	14556.8	880.5	14.6933	4.82247	7.26341	4.56093	9.61451	20.697	0
L5-o-50.0	14580.5	881.439	14.7067	0.553001	2.89919	2.89919	5.95601	12.6135	0
mf 93-710.0	14647.2	884.086	14.7445	1.35382	4.04319	4.04319	0	3.95903	0
L5-o-55.0	14712.3	886.666	14.7814	1.63663	3.72521	3.72521	6.34476	13.5748	0
mf 93-718.0	14790.7	889.774	14.8259	1.36026	3.22896	3.22896	0.563436	4.83573	0
D4-u-20.0	14809	890.5	14.8362	5.01054	7.50797	4.69358	8.92242	21.5104	0.861727
L5-o-60.0	14844.1	891.82	14.8551	0.811107	2.6248	2.6248	6.5465	14.0395	0
mf 93-721.0	14844.5	891.833	14.8553	0	2.09789	2.09789	0	5.13661	0
L5-o-64.0	14949.6	895.782	14.9118	2.15707	4.10887	4.10887	7.37611	13.7165	0
mf 93-731.0	15023.8	898.569	14.9516	1.53934	3.13297	3.13297	0.563436	4.02646	0
L5-o-68.0	15055.1	899.744	14.9684	0.567048	2.06732	2.06732	6.34983	14.3015	0
D4-u-30.0	15075.2	900.5	14.9793	4.95236	8.05404	5.90699	8.06349	17.5195	0
mf 93-740.0	15185.2	905.485	15.0505	0	1.61749	1.61749	0	5.11185	0
L5-o-74.0	15213.3	906.759	15.0688	0.798087	2.58266	2.58266	5.64333	13.5297	0
D4-u-40.0	15295.8	910.5	15.1223	1.13228	2.87899	1.74672	6.81626	21.374	0.716115
mf 93-750.0	15364.5	912.412	15.1496	0.56888	1.84093	1.84093	0	4.92097	0
L5-o-84.0	15477	915.543	15.1944	0.553001	2.06383	2.06383	5.09842	13.6943	0
mf 93-757.0	15490	915.906	15.1996	0.595491	1.43764	1.43764	0	6.53676	0
D4-u-50.0	15655	920.5	15.2652	3.62502	5.22126	3.53858	8.22914	21.5277	0
mf 93-767.0	15669.3	920.816	15.2698	0	0.863868	0.863868	0	4.44047	0
mf 93-777.0	15848.6	924.78	15.3265	0	0.842152	0.842152	0	5.18913	0
mf 93-787.0	16027.9	928.745	15.3832	0	0.990148	0.990148	0	6.11813	0
D4-u-70.0	16107.3	930.5	15.4083	1.44798	2.19752	1.27953	5.91799	20.2822	0
mf 93-797.0	16207.2	935.535	15.4803	0	0.585206	0.585206	0	6.17349	0
mf 93-807.0	16386.6	944.571	15.6095
mf 93-817.0	16565.9	953.606	15.7387	0	0.573539	0.573539	0	5.0133	0
mf 93-827.0	16745.2	962.641	15.8679
D5-o-10.0	16881.3	969.5	15.9659
mf 93-837.0	16924.5	979.5	16.109	1.11111	2.07336	2.07336	0.555556	4.01236	0
D5-o-30.0	17387.3	989.5	16.252
D5-o-50.0	17762.9	1009.5	16.538
D5-o-60.0	17985.7	1019.5	16.681	1.00377	1.50566	1.00377	6.89959	20.6658	0
D5-o-70.0	18245.2	1029.5	16.8239
D5-o-90.0	18692.7	1049.5	17.1099
D5-o-100.0	18825.9	1059.5	17.2529	4.11061	6.18328	4.71768	8.82451	17.0816	0.488532
D5-u-10.0	19050	1071	17.4174
D5-u-50.0	19365	1111	17.9894
D5-u-60.0	19635	1121	18.1324	1.00759	1.00759	1.00759	6.486	19.5725	0.503793
D5-u-70.0	20015	1130.5	18.2683
D6-o-10.0	21000	1162.5	18.7259
D6-o-20.0	21340	1172.5	18.8689	2.45339	3.99612	3.32192	7.30857	14.7035	0
D6-o-30.0	21600	1182.5	19.0118
D6-o-50.0	22249	1192	19.1477
D6-o-60.0	22550	1202	19.2907	2.69593	3.54925	2.44762	4.87156	21.0209	0.492665
D6-o-70.0	22880	1211	19.4194
D6-o-90.0	23456	1238	19.8055
D6-u-5.0	23680	1246	19.9199	4.55575	5.22615	3.73468	6.4227	21.8405	0
D6-u-10.0	23790	1250.7	19.9871
D6-u-15.0	23905	1255.3	20.0529
D6-u-20.0	24035	1260.3	20.1244	2.23129	4.20567	2.7666	7.26068	19.4658	0
D6-u-25.0	24160	1265	20.1916
D6-u-31.0	24280	1269.5	20.256
D6-u-35.0	24380	1274	20.3203	3.58384	5.31855	4.11989	6.21378	20.0712	0
D6-u-40.0	24515	1279.2	20.3947
D6-u-45.0	24635	1283.7	20.459
D6-u-50.0	24755	1288.4	20.5262	3.99001	4.47622	2.01598	6.11672	17.7146	0
D6-u-55.0	24880	1293	20.592	2.99498	3.44905	1.55031	5.97635	19.8689	0
D6-u-60.0	25005	1298	20.6635
D6-u-65.0	25130	1303	20.735	3.68132	3.68132	1.9245	5.86878	16.5005	0.555556
D6-u-70.0	25180	1308.5	20.8136
D6-u-75.0	25295	1312.7	20.8737
D6-u-80.0	25410	1317	20.9352	2.23522	3.3675	2.14502	6.14632	19.7594	0.877058
D6-u-85.0	25530	1321.5	20.9995
D6-u-90.0	25650	1326.5	21.071
D6-u-95.0	25800	1331.3	21.1397	3.28994	4.33938	3.01193	7.28182	21.4608	0
D7-o-4.0	26040	1340	21.2641
D7-o-10.0	26200	1346	21.3499
D7-o-15.0	26320	1351	21.4214	4.22856	5.79676	4.35163	7.24361	21.2966	0.64957
D7-o-20.0	26415	1356	21.4929
D7-o-26.0	26500	1362	21.5787
D7-o-30.0	26580	1366	21.6359	1.42865	1.42865	1.42865	6.99589	21.8106	0.786484
D7-o-34.0	26640	1370	21.6931
D7-o-36.0	26665	1372	21.7217
D7-o-40.0	26715	1376.5	21.786	2.60906	3.99433	3.07081	6.7323	17.4567	0.461757
D7-o-44.0	26765	1379.8	21.8332
D7-o-50.0	26840	1386.3	21.9262
D7-o-54.0	26880	1390.5	21.9863	1.23847	2.26444	1.75145	6.64745	24.0915	0.888523
D7-o-60.0	26890	1396.5	22.0721
D7-o-64.0	26995	1401	22.1364
D7-o-70.0	27100	1407	22.2222	0.510976	1.53293	1.02195	6.66394	23.4313	0.510976
D7-o-75.0	27160	1413.5	22.3151
D7-o-80.0	27182	1418.5	22.3866
D7-o-83.3	27189	1421.75	22.4331	2.97746	3.57295	2.38197	6.02878	26.0801	0.842152
D7-o-84.1	27190.8	1422.55	22.4446
D7-o-84.9	27192.5	1423.35	22.456
D7-o-85.3	27193.4	1423.75	22.4617	2.3862	2.3862	1.78965	7.1287	25.2191	1.1931
D7-o-86.5	27196	1424.95	22.4789
D7-u-20.0	27275	1461.5	23.0016	2.1542	3.54392	2.50809	7.47684	19.3184	0
D7-u-40.0	27400	1481	23.2804	2.77066	4.73346	3.6567	6.51958	21.3988	0
D7-u-50.0	27435	1490.5	23.4163
D7-u-60.0	27495	1500.5	23.5592	1.69029	3.53793	2.34271	7.66906	19.0814	0.857493
D7-u-80.0	27670	1518	23.8095	2.21944	4.04703	3.29002	7.37434	20.1055	0.535288
D8-u-10.0	30390	1655.5	25.7758
D8-u-30.0	30685	1679.5	26.119	4.76361	7.73167	5.23261	8.10354	18.6618	0.800641
D8-u-40.0	30795	1689.5	26.2619
D8-u-50.0	30981	1699	26.3978	5.00829	7.70698	5.95164	8.80971	19.8781	0
D8-u-70.0	31174	1729	26.8268
D8-u-80.0	31314	1737	26.9412
D8-u-90.0	31368	1746.5	27.077	3.45876	6.42427	4.94369	8.99392	19.3579	0.541928
D9-o-10.0	31554	1765.5	27.3487
D9-o-30.0	31721	1785.5	27.6348
D9-o-40.0	31855	1796	27.7849	2.13991	4.28416	3.37973	7.44204	20.0394	0.904431
D9-o-50.0	32061	1808.5	27.9637
D9-o-60.0	32210	1817.5	28.0923
D9-o-70.0	32355	1826.2	28.2168	5.42455	8.591	6.67397	9.10834	22.2525	0
D9-o-90.0	32675	1844.5	28.4784
D9-u-10.0	32956	1860.9	28.713
D9-u-30.0	33318	1883.5	29.0361	2.7468	4.63356	3.26016	7.83463	20.7058	1.39347
D9-u-50.0	33544	1907.5	29.3793
D9-u-60.0	33646	1918	29.5295
D9-u-70.0	33753	1927.5	29.6654	5.60462	8.43074	6.16296	8.17729	21.4917	1.06904
D9-u-80.0	33816	1936.5	29.7941
D10-o-11.0	33963	1994	30.6163	6.31033	10.5639	9.01714	7.06999	18.9645	0.566139
D10-o-30.0	34021	2022	31.0167	8.02965	12.121	8.52601	5.71481	11.9826	1.3403
D10-o-40.0	34046	2037.5	31.2384	11.4907	14.6949	11.7244	6.6245	9.32963	0
D10-o-60.0	34086	2071.5	31.7246	6.42907	10.0463	7.14606	6.43542	11.2691	0
D10-o-71.0	34107	2091	32.0034	5.16414	8.78824	7.69498	7.3066	18.1314	0
D10-o-92.0	34146	2120.5	32.4253	9.74473	11.7135	8.94335	6.42713	16.6144	0
D11-o-10.0	34493	2260	34.4201	5.03451	7.68796	4.95757	6.89504	19.0651	0.543928
D11-o-20.0	34494	2270	34.5631	7.92737	11.4187	8.34519	7.29127	16.1021	0
D11-o-30.0	34495	2280	34.7061	7.30677	10.9159	7.49696	7.19979	14.4068	1.13047
D11-u-30.0	34656	2354.1	35.7657	8.83562	13.0561	9.47614	7.2683	17.6935	0.961139
D11-u-40.0	34856	2364.3	35.9116	11.0584	16.628	13.4526	8.2287	15.0827	0
D11-u-50.0	35025	2378	36.1075	7.7767	12.0981	10.1969	7.9631	14.7122	0
D11-u-70.0	35231	2399.5	36.4149	5.81713	12.4575	10.9668	7.35728	16.1723	0.702728
D11-u-90.0	35571	2422.5	36.7439	3.44827	7.46593	6.71322	7.47987	16.7206	0
D12-o-20.0	35890	2456.5	37.23	1.88518	4.01856	2.13337	7.06488	20.3672	0.780869
D12-o-30.0	36048	2473.5	37.4732	2.65224	4.95252	4.35168	6.6192	20.012	0.849719
D12-o-40.0	36051	2485.5	37.6448	2.68144	4.77686	2.70287	6.78235	20.791	0
D12-o-60.0	36270	2500	37.8521
D12-o-70.0	36335	2513	38.038	2.10931	2.10931	2.10931	5.45628	21.1432	0.873704
D12-o-90.0	36555	2547.5	38.5314
D12-u-10.0	36695	2574.5	38.9175	2.66207	5.73596	4.84861	8.54109	21.1546	0.887357
D12-u-20.0	36733	2592	39.1677
D12-u-42.0	36773	2638	39.8255	4.82451	6.87676	5.26859	6.80543	21.2377	0
D12-u-70.0	36844	2668.5	40.2617
D12-u-90.0	37106.7	2697.5	40.6763	4.80788	6.974	4.33224	7.60621	19.3399	0
D13-o-10.0	37361.6	2713	40.898
D13-o-32.0	37594.5	2736	41.2269	7.53671	10.6943	8.56831	8.37445	20.1131	0
D13-o-70.0	38049.3	2760	41.5701	5.96146	8.47578	6.61883	6.82288	20.5862	0
D13-o-90.0	38292.1	2772.5	41.7488	6.24221	10.0079	7.65959	8.52586	18.0381	0.52778
D13-u-10.0	38564.3	2789.5	41.992
D13-u-30.0	38764.9	2831	42.5854	7.52275	12.185	9.14913	8.19215	17.7332	1.04828
D13-u-70.0	40088.1	2888	43.4005	9.52787	16.2342	12.8367	8.71175	14.4818	0
D13-u-90.0	40088.2	2889	43.4148	11.7285	18.1952	13.6333	8.83365	13.3198	0.725476
D14-o-10.0	40088.3	2890	43.4291	8.73988	13.2186	9.21217	9.38755	17.1618	1.20386
D14-o-30.0	40088.4	2891	43.4434	13.2253	20.1343	15.7486	9.12711	15.1912	0
D14-o-70.0	40088.5	2892	43.4577	11.1533	17.5608	14.6416	8.23977	16.7104	0
D14-o-90.0	40088.6	2893	43.472	10.1206	15.2579	12.0699	8.67511	17.2792	0.492068
D14-u-10.0	40088.7	2894	43.4863	14.234	22.688	17.8852	8.33142	10.9687	0.939336
D14-u-30.0	40088.8	2895	43.5006	7.18832	12.0424	9.37766	8.52956	18.6053	0.486792
D14-u-70.0	40525	2953	44.33	6.90517	9.26505	6.57161	8.58392	20.0856	0.984136
D14-u-89.0	40729.5	2968	44.5445	14.4609	22.0217	17.0223	7.70921	11.9326	0
D15-o-5.0	40938.9	2973	44.616	5.03046	9.52703	6.44199	6.73987	19.71	0
D15-o-10.0	41002.5	2978	44.6875	7.25555	10.9023	8.33992	8.34748	18.7095	0
D15-o-15.0	41065.8	2982.5	44.7518	3.58869	6.66449	5.2531	5.78444	20.0323	0
D15-o-20.0	41129.1	2987	44.8162	5.49363	8.71339	6.48818	8.38908	19.5968	0
D15-o-25.0	41192.4	2992	44.8877
D15-o-30.0	41245.5	2997.5	44.9663	6.29851	8.66245	6.90745	7.40921	16.4426	0.542326
D15-o-35.0	41275.9	3002	45.0307	9.062	12.2885	10.5213	9.35002	18.0437	0.561656
D15-o-40.0	41357.9	3007	45.1022	11.4975	16.8305	13.4954	8.90703	14.9408	0
D15-o-45.0	41426.6	3012.5	45.1808	9.50688	14.1407	11.2279	8.02591	17.6395	0.488532
D15-o-50.0	41516.7	3017.5	45.2523	8.19992	12.2372	9.60131	7.78395	17.7758	0.539949
D15-o-55.0	41654.9	3023	45.331	10.301	14.8516	10.399	6.50953	14.2704	0.532246
D15-o-60.0	41754.6	3028	45.4025	11.2002	15.8204	12.288	8.03667	15.3629	0.511645
D15-o-64.0	41866.6	3030.5	45.4383	13.0936	18.3151	13.2711	6.76379	16.396	0
D15-o-70.0	42035	3036.5	45.5241	12.693	18.2331	12.8884	7.05345	13.8209	0
D15-o-74.0	42147	3041	45.5884	11.4103	16.776	12.684	7.28574	14.4827	0
D15-o-80.0	42318.3	3047	45.6742	7.36741	12.2605	9.67012	9.23231	17.9846	0
D15-o-86.0	42488	3052.5	45.7529	15.4806	22.6719	16.4391	7.55833	13.5055	0
D15-o-90.0	42610.2	3057.5	45.8244	14.826	22.69	16.7449	7.90259	12.8956	0.468807
D15-u-3.5	42904.9	3068.5	45.9817	14.0521	19.4502	14.7742	7.96883	11.8428	0
D15-u-9.5	43072.9	3074.5	46.0675	13.9646	20.4315	15.6611	8.44176	10.8926	0.739221
D15-u-13.5	43184.9	3078.5	46.1247
D15-u-18.5	43320.4	3083.5	46.1962	11.1333	17.9059	13.9801	7.74011	10.914	0
D15-u-29.5	43618.2	3094.5	46.3535	11.1517	16.9147	12.0633	9.6985	13.6071	0
D15-u-33.5	43711.1	3098.5	46.4107	9.3808	14.6793	9.85663	9.44245	15.611	0.681203
D15-u-38.0	43818	3103	46.475	5.20726	9.05912	6.16297	8.39323	16.3947	0.544735
D15-u-43.5	43971.6	3108	46.5465	7.55731	11.1508	7.88341	8.81511	17.1291	0.547997
D15-u-48.0	44097.4	3112.5	46.6108	9.08596	11.7273	8.32269	8.76004	16.9975	0.539164
D15-u-53.5	44251.6	3121.5	46.7396	5.32463	7.54003	5.11538	7.90422	18.8174	0
D15-u-58.5	44391.8	3126.5	46.8111	3.67159	5.01999	2.99765	7.14423	21.5002	0
D15-u-62.5	44503.9	3130.5	46.8683	4.88462	6.43459	4.93743	7.08975	17.8431	0
D15-u-64.5	44560	3132.5	46.8969	12.678	18.2116	12.8731	7.04511	14.6213	0
D15-u-69.5	44700.1	3137.5	46.9684	4.34611	6.26554	4.09249	8.32042	19.7381	0
D15-u-73.5	44811.7	3142	47.0327	4.61069	7.50684	5.61982	8.21249	19.8216	0.544735
D15-u-89.5	45255	3155	47.2186	8.44232	12.0923	7.9802	9.09218	17.6427	0.503793
D16-o-1.0	45707.2	3160	47.2901	4.93134	7.34255	4.96256	7.7224	21.7707	0.539164
D16-o-11.0	45707.6	3170	47.4331	6.09869	8.57823	5.56558	8.69041	18.5433	0.538382
D16-o-20.0	45716.6	3177	47.5332
D16-o-30.0	45973.5	3187	47.6762	9.12895	13.2576	9.81064	7.51743	19.0436	0
D16-o-40.0	46135.1	3196	47.8049	10.5467	14.675	10.7356	8.22703	16.7418	0
D16-o-50.0	46403.9	3204	47.9193	10.7073	15.5318	9.52257	8.97678	12.6832	0
D16-o-60.0	46683.8	3212	48.0337	10.1934	14.3986	11.2889	8.16578	14.8942	0
D16-o-70.0	46963.7	3222.2	48.1796	6.23983	9.36909	7.65521	8.39666	19.3135	0
D16-o-80.0	47244.1	3231.7	48.3154	7.67041	12.0855	9.43546	9.72984	16.9553	0
D16-o-90.0	47519.7	3242.5	48.4699	11.0284	15.002	9.64518	6.81895	15.4294	0
D16-u-1.5	47743.8	3256.5	48.6701	10.9656	14.7303	8.9809	8.0647	15.2564	0
D16-u-11.0	48009.9	3262.5	48.7559	9.2309	13.0614	8.26677	7.48456	16.8262	0
D16-u-30.5	48272.7	3276	48.9489	9.92279	14.3309	9.81763	5.1707	15.1446	0
D16-u-31.0	48566.5	3276.5	48.956	12.3225	17.2135	11.6897	8.86936	14.406	0
D16-u-40.5	48832.8	3282	49.0347	13.5025	18.8245	12.5289	9.50991	14.0726	0.515711
D16-u-50.0	49094.3	3290.5	49.1562	8.37879	11.7525	8.38745	10.4483	12.4932	0
D16-u-50.5	49108.3	3291	49.1634	12.3643	17.7038	11.7209	8.00772	15.7656	0
D16-u-60.5	49317.6	3300	49.2921	12.2831	18.3401	12.3071	7.59591	14.1132	0
D16-u-70.5	49554.6	3309.5	49.428	12.3573	17.1444	11.411	7.63435	15.8819	0
D16-u-80.5	49695.4	3318.5	49.5566	12.9639	18.8799	14.2149	7.67292	13.7466	0
D16-u-90.5	49972.3	3328.5	49.6996	13.0253	19.5389	13.3775	7.30143	13.5461	0
D16-u-99.5	50224.5	3337	49.8212	13.5899	19.921	14.9384	7.92544	16.1997	0
D17-o-6.0	50614.2	3343.5	49.9141	14.4644	21.6468	16.0187	7.69437	12.5124	0.521286
D17-o-16.0	50887.4	3353.5	50.0572	14.532	20.6736	14.6851	7.61775	12.1316	0
D17-o-21.0	51027.4	3358.5	50.1287	14.6095	20.5403	16.227	8.40706	13.6344	0.511645
D17-o-23.0	51083.5	3360.5	50.1572
D17-o-26.0	51167.5	3363.5	50.2002	11.6367	17.9967	13.5364	7.45854	13.8598	0
D17-o-36.0	51447.6	3373	50.336
D17-u-1.0	51727.4	3383	50.479	15.7019	22.5344	16.5019	9.22235	11.6008	0
D17-u-11.0	51959.1	3393	50.622
D17-u-21.0	52238.9	3401.5	50.7435	15.1292	21.0544	16.6065	7.63313	9.70861	0
D17-u-26.0	52378.9	3406.5	50.815
D17-u-31.0	52518.8	3409.5	50.858	12.7376	18.9924	15.028	8.74129	16.936	0
D17-u-36.0	52658.8	3415	50.9366
D17-u-41.0	52799	3420	51.0081	12.3691	18.0003	14.5495	8.63655	12.5532	0
D17-u-51.0	53079.5	3430.5	51.1583
D17-u-61.0	53359.8	3440	51.2941	11.1735	17.0705	13.3331	8.64838	15.1737	0
D17-u-67.0	53527.6	3446	51.3799	11.0108	15.8473	11.4834	9.08627	16.2409	0
D17-u-72.0	53658.3	3450	51.4371	6.21204	10.4579	7.91572	8.22661	15.691	0
D17-u-77.0	53730.7	3454	51.4943	9.92303	15.7844	11.3128	9.74026	14.2749	0
D17-u-81.0	53842.8	3457.5	51.5444	6.9552	10.3293	7.97592	8.70582	18.1875	0
D17-u-91.0	54060.9	3466.5	51.6731	5.18594	8.26492	6.80181	7.7096	18.4217	0
D18-o-49.5	54390.6	3483.5	51.9162	5.15854	7.87818	4.97491	9.00328	17.4159	0
D18-o-69.0	54835.2	3503	52.195	2.64596	3.74196	2.41897	8.6136	20.2644	0
D18-o-79.0	55364.2	3511.5	52.3165	6.18388	9.00604	6.85085	8.73948	19.5626	0
D19-o-10.0	55863.5	3548	52.8385
D19-o-30.0	56295.6	3567.5	53.1174	5.96424	9.36267	5.98757	8.84903	16.6016	0
D19-o-50.0	56996.8	3586	53.3819
D19-o-62.0	57229.8	3596	53.5249	3.56146	5.3551	3.56146	7.86092	21.9419	0.732252
D19-o-72.0	57357.7	3606.5	53.675
D20-o-7.0	57761.8	3639.5	54.147	8.15417	11.648	8.99594	7.15377	16.0492	0.484502
D20-o-27.0	58004.6	3659	54.4258
D20-o-47.0	58341	3677.5	54.6904	8.76962	12.9399	9.43819	8.30018	14.523	0.578315
D20-o-67.0	58629.1	3698.5	54.9907	9.15037	13.5799	9.76803	8.42154	17.6896	0
D20-o-87.0	58805.7	3718.5	55.2767	10.4482	15.1992	11.3341	7.77841	14.352	0.529999
D21-o-10.0	59165.3	3748	55.6985	6.70435	11.5804	8.44295	9.14406	18.0148	0
D21-o-30.0	59477.9	3769.5	56.0059	4.83134	9.67567	7.58669	8.81911	16.7808	0
D21-o-50.0	59791.4	3792	56.3277	6.80099	12.393	10.2579	8.84753	16.4452	0
D22-o-1.0	60055	3803.5	56.4922	5.61382	8.31554	7.10729	8.92736	18.362	0.604122
D22-o-18.0	60055.6	3821.5	56.7495	6.2335	11.0777	9.33043	8.64443	17.0595	0.539949
J18-u-32.0	60152.3	3833	56.914	5.22287	9.17679	7.28401	7.64681	16.8242	0.519174
J18-u-54.0	60230.4	3854	57.2143
J18-u-62.0	60341	3861	57.3144	4.87894	7.37031	5.76599	9.08781	21.335	1.0171
J18-u-70.0	60461.1	3868.5	57.4216
J18-u-88.0	60731.2	3886	57.6719	3.24066	7.58107	7.00753	6.85635	17.2491	0.573539
J19-o-67.0	61091.4	3907	57.9722
J19-o-83.0	61331.5	3921	58.1724	7.11386	10.6742	8.80223	9.69286	17.9329	0.969003
J19-u-16.0	61721.4	3943.3	58.4913
J19-u-30.0	62004.1	3958.5	58.7086	6.66485	10.3861	8.1457	9.28943	16.6711	1.17041
J19-u-48.0	62367.7	3975	58.9446
J19-u-64.0	62690.8	3992.5	59.1949	7.42605	9.90787	7.66144	8.86765	17.0315	0.851257
J19-u-88.0	63175.5	4016.5	59.538
J20-o-79.0	63660.2	4041.7	59.8984	4.35773	6.88917	5.3875	7.66882	18.8365	0.777322
J20-o-87.0	63821.8	4050	60.0171
J20-u-1.5	64154.3	4060.8	60.1715	2.709	5.23621	4.60813	7.71055	19.98	0.628074
J20-u-17.5	64282.9	4075.1	60.376
J20-u-33.5	64411.5	4090.5	60.5962	4.12293	5.81324	4.34939	7.25794	17.9343	0.48795
J20-u-49.5	64594.4	4103.5	60.7822
J20-u-65.5	64824	4119	61.0038	1.84324	3.01942	2.24943	6.47478	21.0082	0.889108
J20-u-81.5	65053.7	4133	61.204
J21-o-78.0	65225.9	4148	61.4185	2.90708	4.40279	3.45682	6.423	18.2604	0.472984
J21-o-94.0	65455.5	4162.5	61.6258
J21-u-20.0	65685.1	4172.5	61.7689	1.72885	3.24796	2.53185	6.62903	19.7321	0.716115
J21-u-36.0	65914.8	4187	61.9762
J21-u-59.0	66244.8	4206.5	62.2551	6.75503	8.37071	5.8632	6.96541	22.5513	0.776151
J21-u-76.0	66488.8	4221.5	62.4695
J21-u-92.0	66718.4	4235.5	62.6698	3.02935	4.16042	3.04564	6.63513	22.1614	0.461757
J22-u-4.0	66948.1	4243	62.777
J22-u-16.0	67120.3	4255	62.9486	3.46993	4.89293	3.84873	7.31348	21.8549	0.683586
J22-u-40.0	67464.7	4277	63.2632
J22-u-62.0	67780.4	4293.5	63.4992	10.4788	13.9579	11.1497	7.98901	20.293	0
J22-u-79.0	68024.4	4310	63.7351
J22-u-95.0	68254	4325.5	63.9567	3.64689	4.38476	3.17981	6.16016	22.065	0.737878
J23-u-6.0	68411.9	4339	64.1498
J23-u-20.0	68647.8	4352.5	64.3428	1.93247	2.57663	1.28831	7.19211	23.1036	0
J23-u-36.0	68944.6	4366.5	64.543
J23-u-52.0	69241.4	4383	64.779	6.59829	9.14864	7.1028	8.26852	18.8669	0.611418
J23-u-68.0	69543.2	4396.5	64.972	13.1863	16.3959	12.2962	9.75255	16.0656	0.56299
J23-u-84.0	69778.9	4411	65.1794	11.6927	16.525	13.3802	8.73587	15.4016	0.394055
J24-u-13.0	70115.5	4429	65.4368	9.42828	13.2457	10.0604	8.61135	14.4945	0.713376
J24-u-21.0	70250.2	4436	65.5369	9.39567	12.6289	10.1594	9.01941	16.7216	0.451294
J24-u-37.0	70478.3	4452	65.7657	6.25587	7.9984	5.20701	7.79287	19.5619	0.449921
J24-u-53.0	70674.3	4468	65.9945	6.57089	8.14711	6.50653	8.37307	18.3337	0.78811
J24-u-69.0	70870.4	4481	66.1804	5.31616	7.22101	5.67429	7.8271	19.861	0.38097
J24-u-85.0	71066.5	4497.5	66.4163	12.8727	16.9387	13.2394	8.73435	16.6163	0.567962
J25-u-42.0	71287	4509	66.5808	10.2267	14.8473	11.7481	9.0594	16.3474	0.95673
J25-u-54.0	71434.1	4518	66.7095	13.0711	18.0213	14.2401	10.0007	16.3341	0.404226
J25-u-70.0	71630.1	4532	66.9097	12.9586	17.9485	14.6898	9.55663	16.1952	0.444554
J25-u-86.0	71826.2	4582	67.6247	12.418	15.9138	13.0798	8.95678	15.6449	0.718576
J26-o-15.0	72022.2	4604	67.9393	6.14214	7.69444	5.26827	8.92261	19.6057	1.09764
J26-o-31.0	72282.8	4622	68.1967	5.53716	8.51034	6.68965	8.58492	20.2015	1.05118
J26-o-47.0	72593.5	4638	68.4255	3.67929	5.20783	4.24109	9.22181	20.465	0.683586
J26-o-62.5	72894.5	4654	68.6543	4.07286	5.39508	3.76073	7.42376	19.2299	0.707697
J26-o-79.0	73228.8	4669.5	68.8759	3.57159	5.05476	4.11195	7.08226	19.6862	0.471405
J26-o-95.0	73555.5	4686	69.1119	9.92119	13.9023	11.1288	8.85066	15.5972	0.693375
J26-u-12.0	73882.1	4705	69.3836	7.82228	9.84488	7.32431	9.65734	18.5593	0.825723
J26-u-28.0	74208.7	4722	69.6267
J26-u-44.0	74535.4	4740.5	69.8913	6.52631	9.55054	7.57115	8.95015	19.4192	0
J26-u-60.0	74862	4756.5	70.12
J26-u-76.0	75188.7	4772.5	70.3488	6.58066	9.10129	6.56353	10.2692	19.0886	0.525588
J27-o-4.0	75331.6	4795.5	70.6778
J27-o-20.0	76142.5	4801.5	70.7636	8.46364	12.4014	8.27013	10.3595	15.7312	0
J27-o-36.0	76570.4	4819	71.0138
J27-o-52.0	76804.4	4835.8	71.254	8.53488	11.93	9.7175	7.92592	16.199	0.836242
J27-o-68.0	77038.4	4853	71.5	11.8547	15.9361	12.7277	10.7375	16.8166	0
J27-u-2.0	77184.7	4884.3	71.9476	10.9185	15.5877	11.6928	9.16465	15.9315	0.841406
J27-u-10.0	77301.7	4892.5	72.0649	13.8314	19.4121	14.5224	10.4052	15.814	0.657241
J27-u-18.0	77490.2	4903	72.215	14.8881	20.5017	14.8364	9.20288	12.7548	0
J27-u-27.0	77595.1	4912	72.3437	14.5331	19.1742	13.2571	10.2802	15.7032	0.46676
J27-u-42.0	77693.8	4928	72.5725	11.9651	16.783	11.9714	9.73089	17.2305	0
J27-u-58.0	77799.1	4945	72.8156	14.9169	20.3581	14.2802	11.2785	13.7954	0
J27-u-74.0	77904.4	4962.5	73.0659	11.5218	16.8814	13.2917	10.2469	14.1498	0
J28-o-76.0	78200.5	4993.5	73.5092	11.4649	18.4873	16.3673	9.11601	14.6866	0
J28-o-92.0	78305.8	5006.8	73.6993	8.71858	12.9077	10.5085	9.75314	18.2787	0.407909
J28-u-15.0	78549.9	5023	73.931	6.54209	9.09697	6.97833	9.58944	17.543	1.02195
J28-u-31.0	78816.1	5038	74.1455	5.27417	7.24038	5.50707	8.84516	19.6244	0
J28-u-47.0	79082.3	5052.7	74.3557	13.6599	19.9692	17.1018	8.98663	11.4119	0
J28-u-63.0	79348.5	5067.5	74.5674	12.9058	19.5416	15.8684	9.06281	12.72	0.645497
J28-u-79.0	79462.1	5082.5	74.7818	6.12482	9.1039	7.51946	9.64987	17.2568	0
J29-o-20.0	79501.3	5101.5	75.0536	13.1535	19.7624	16.5552	8.64711	10.924	0
J29-o-34.0	79561.4	5118	75.2895	7.32963	10.118	7.61802	8.65562	16.4704	1.02062
J29-o-50.0	79632	5135.5	75.5397	15.4197	23.7577	21.1028	9.54777	10.3682	0
J29-o-66.0	79738.7	5153.5	75.7971	11.4788	19.2008	15.2309	9.76886	17.2256	0
J29-o-82.0	79953.5	5171.5	76.0546	10.7253	17.1686	14.7751	9.61658	12.6635	0
J29-u-3.0	80208.6	5195	76.3906	14.3136	22.8183	20.6501	7.34263	10.0747	0
J29-u-11.0	80316	5203.5	76.5121
J29-u-27.0	80626	5219.5	76.7409	14.73	25.0645	23.1062	9.31312	8.7951	0
J29-u-43.0	81007	5237	76.9912
J29-u-51.0	81175.4	5245	77.1056	15.7073	23.4154	20.3686	10.3162	9.27041	0
J29-u-73.0	81559.2	5268	77.4345
J30-o-43.0	82215	5313.5	78.0851	12.7715	17.4771	13.6093	9.59676	15.953	0.561656
J30-o-58.0	82411.7	5328.5	78.2997	10.7305	15.2724	11.8516	10.4889	16.8686	0.69843
J30-o-66.0	82516.6	5336.5	78.4141	8.71489	11.846	9.63727	9.14674	18.3046	0
J30-o-82.0	82565.3	5352	78.6357	14.0849	19.9895	16.1387	8.16785	11.7733	0
J30-u-11.0	82584	5377	78.9932	13.59	20.4166	16.3758	8.47368	9.18013	0.481683
J30-u-19.0	82589.7	5385.5	79.1148	10.9122	14.7999	11.7063	10.1101	16.4451	0
J30-u-35.0	82601.2	5402.5	79.3579	9.3543	13.2205	10.3566	9.76356	17.1669	0
J30-u-51.0	82612.7	5418.5	79.5866	8.20568	11.4471	9.45157	9.79099	16.8501	0
J30-u-59.0	82618.4	5427	79.7082	13.0442	17.4147	11.7157	8.60524	13.6445	0
J30-u-75.0	82733.1	5444	79.9513	14.1191	23.0359	18.6508	8.10993	10.651	0
J30-u-83.0	82906.9	5452.5	80.0728	15.5319	23.447	19.3859	9.66107	11.3177	0
J30-u-91.0	83080.7	5460.5	80.1873
J30-u-95.0	83124.2	5464.5	80.2445	15.3192	23.4025	18.9409	6.17901	8.72697	0.685725
J31-o-36.0	83504.9	5478.5	80.4446
J31-o-52.0	84140.6	5495	80.6806	16.1155	25.0644	21.8092	7.38834	7.16457	0
J31-o-68.0	84545.3	5510	80.8951
J31-o-84.0	84949.9	5526.5	81.131	14.6472	22.5579	20.1907	9.20835	9.07597	0
J31-u-6.0	85392.6	5547.5	81.4314
J31-u-22.0	85754	5564.5	81.6745	15.4337	24.8703	22.6109	7.27722	8.48373	0
J31-u-38.0	86223.3	5582	81.9247	16.4401	24.1839	23.2136	6.73875	7.37942	0
J31-u-54.0	86861	5599	82.1678	16.7256	25.1051	25.1051	6.50446	5.87097	0
J31-u-70.0	87539.2	5615	82.3966	12.3857	20.988	19.6386	7.72848	10.7907	0
J31-u-86.0	87723.9	5631	82.6254	13.2367	22.0521	21.4093	7.66973	6.57201	0
J32-o-18.0	87914.4	5649	82.8828	10.568	18.0816	15.6217	6.10201	9.98675	0.592349
J32-o-24.0	87983.7	5655	82.9686
J32-o-32.0	88076.1	5662.6	83.3537	12.3942	19.5488	16.9811	6.32802	11.1961	0
J32-o-40.0	88168.5	5670.5	83.4287	6.20607	12.3028	10.6009	7.89347	17.2125	0.466252
J32-o-44.0	88214.7	5674.5	83.4668	8.46565	14.4919	12.7423	6.99139	16.1428	0.662994
J32-o-48.0	88260.8	5678.5	83.5048	8.24819	15.5694	13.2298	7.70089	16.8659	0.529999
J32-o-52.0	88307	5682.7	83.5447	9.34929	15.76	13.2463	7.46208	18.183	1.03142
J32-o-56.0	88353.2	5687.5	83.5902	6.55232	12.1685	10.6235	6.98945	18.5442	0.403567
J32-o-60.0	88399.4	5691.5	83.6282	7.27552	14.5077	14.0326	5.87436	15.0618	0.475114
J32-o-64.0	88445.6	5695.3	83.6643	7.98963	12.5843	10.8788	8.07208	18.0703	0.912871
J32-o-68.0	88491.8	5699.3	83.7023	7.60819	13.8448	12.9905	6.6543	14.7603	0.854358
J32-o-72.0	88538	5703.8	83.7451	7.40327	12.7369	10.8407	7.82207	18.806	0
J32-o-88.0	88599.5	5719.8	83.8971	13.3888	19.7072	15.9792	9.11843	14.449	0
J32-u-8.0	88621.5	5727	83.9655	8.96169	15.5273	13.1229	5.83218	19.3991	0
J32-u-16.0	88650.9	5735.3	84.0443	5.57782	10.9011	9.85716	7.53454	16.781	0
J32-u-40.0	88739	5758.3	84.2629	8.51275	14.4967	13.0703	8.28347	16.1803	0.539164
J32-u-56.0	88797.7	5774.5	84.4167	6.08467	9.63572	9.09419	6.38895	18.1299	0
J32-u-64.0	88827.1	5782.6	84.4937
J32-u-72.0	88856.4	5791	84.5735	5.47197	6.83532	6.22561	6.23097	19.4043	0.609711
J32-u-88.0	88915.2	5806	84.716
J32-u-104.0	88973.9	5810	84.754	5.44839	8.66724	7.00442	4.60415	20.6702	0
J33-o-85.0	89047.3	5812	84.773
J33-u-9.0	89098.7	5833.6	84.9782	8.45875	12.8154	11.03	5.69948	20.6437	0.692543
J33-u-25.0	89142.1	5847.7	85.1121
J33-u-41.0	89171.2	5862	85.248	8.56086	11.6187	9.33744	4.87789	17.4474	0
J33-u-57.0	89200.3	5877.5	85.3953
J33-u-75.0	89233.1	5894	85.552	10.3896	16.3737	11.9895	6.77274	18.2705	0.836242
J33-u-91.0	89267.9	5909	85.6945	5.40489	9.42505	9.42505	5.26905	17.8455	1.00504
J34-o-64.0	89324.3	5933.5	85.9273	7.13059	10.2696	7.69293	6.31474	19.1275	0.644157
J34-o-80.0	89388	5949.5	86.0793	6.81773	9.6997	8.01207	5.85788	23.2462	0
J34-o-96.0	89430.7	5964	86.217	9.60364	13.2474	8.93077	7.18895	18.4899	0.719816
J34-u-1.0	89445.7	5968	86.255	12.5609	17.2681	13.6631	6.31858	17.2968	0.486217
J34-u-16.0	89477.9	5983	86.3975	5.93572	6.77987	5.69007	5.25747	22.548	0.48737
J34-u-29.0	89531.8	5995	86.5115	13.8137	20.4426	16.1802	6.69539	16.3547	0
J34-u-45.0	89600.2	6011.5	86.6683	9.99899	13.8256	11.9724	7.74173	21.7445	0.880451
J34-u-61.0	89668.5	6028	86.825	6.8637	11.4693	9.05504	7.21005	17.8562	0
J34-u-77.0	89736.8	6045.5	86.9912	14.0506	19.1268	13.9834	7.64725	14.6238	0.514344
J35-u-5.0	89813.7	6061	87.1385	16.4634	20.933	14.134	5.358	11.5831	0.434783
J35-u-21.0	89882	6077.5	87.2952	6.1091	8.6039	6.84403	6.06423	18.6464	0
J35-u-29.0	89916.1	6085.7	87.3731	3.95369	5.40083	4.14757	4.15662	21.0104	0.723575
J35-u-37.0	89950.3	6094.5	87.4567	5.10853	7.36325	5.72879	4.71863	19.0861	0.714286
J35-u-53.0	90018.6	6109.8	87.6021	8.18969	12.3237	8.67219	6.45106	16.2712	1.69031
J35-u-69.0	90087	6125.8	87.7541	10.6344	14.7275	9.73265	5.87728	17.9358	0
J35-u-85.0	90155.3	6141.8	87.9061	4.69017	8.27249	5.30364	4.30331	17.4479	0.860663
J36-o-80.0	90244.9	6167	88.1455	15.1104	20.3795	14.4718	6.00653	9.63809	0
J36-o-88.0	90279.1	6176	88.231	16.1042	22.0497	17.4356	8.09867	9.47208	1.066
J36-u-4.0	90338.9	6189.5	88.3593	13.384	17.5333	11.9015	6.69781	13.0623	0.968246
J36-u-21.0	90411.5	6204	88.497	10.4743	13.028	9.8596	9.48103	17.7323	0
J36-u-37.0	90479.8	6220.5	88.6538	13.0587	19.0452	13.988	7.65034	12.0831	0
J36-u-53.0	90548.1	6237	88.8105	12.8645	18.2451	13.6552	8.22341	14.7879	0.749532
J36-u-69.0	90616.4	6252.5	89.0178	9.31225	13.7443	11.1627	10.7936	15.9305	0
J36-u-77.0	90650.6	6260.5	89.1274	16.6095	19.5701	13.4272	8.67712	9.4372	0
J36-u-93.0	90718.9	6275	89.326	13.1922	17.2873	12.2586	7.71731	13.4435	0
J37-o-58.0	90830	6313.5	89.8535	16.5019	18.9366	11.4796	5.6327	8.02348	0
J37-o-72.0	90889.7	6327.5	90.0453	17.7397	24.5571	18.5731	7.26165	10.4223	0
J37-o-88.0	90958.1	6342	90.2439	17.7054	24.2248	17.9589	6.66999	8.28497	0.731272
J37-u-17.0	91154.4	6369.7	90.6234	16.7567	23.6046	18.3588	6.27103	7.39678	0.433555
J37-u-33.0	91698	6386.5	90.8536	18.1956	25.9091	19.7898	6.39203	8.2773	0
J37-u-49.0	92126.8	6402.5	91.0728	19.5804	26.4438	19.5226	7.21598	5.94555	0
J37-u-65.0	92555.6	6418	91.2851	18.2589	25.3633	19.4807	7.33755	6.08928	0
J37-u-81.0	92950.2	6435	91.518	17.4901	25.0196	18.3998	6.83835	6.16965	0
J37-u-97.0	93316.1	6451.5	91.7441	17.894	24.9224	17.5674	8.78432	6.1412	0.429537
J38-o-85.0	93364.8	6457.5	91.8263	18.3238	23.2677	14.1585	6.54313	6.14231	0
J38-o-95.0	93628.9	6467	91.9564	18.5363	24.8288	15.9404	7.64049	7.39531	0
J38-u-8.0	93635	6480.5	92.1414	20.978	26.7629	17.4343	9.25654	7.35588	0
J38-u-24.0	94124.3	6498.5	92.388	18.849	24.1612	16.3019	7.39184	6.1907	0
J38-u-40.0	94701.6	6515	92.614	19.3886	24.3385	16.9089	6.97944	6.70052	0
J38-u-56.0	95177	6532	92.8469	18.1118	22.8648	14.8984	6.29199	4.23935	0.435607
J38-u-72.0	95815.9	6547.7	93.062	18.7824	25.7704	17.7192	7.69257	6.72053	0
J38-u-88.0	95969.3	6563.5	93.2785	20.2825	26.6892	19.0834	7.14025	5.15516	0
J38-u-98.0	96050.2	6573.5	93.4155	19.4851	26.9825	20.0796	7.8152	6.36309	0
J39-o-90.0	96199.2	6590.3	93.6456	18.755	23.4515	15.8763	5.73311	4.56489	0.428353
J39-u-2.0	96711.9	6603	93.8196	18.7475	25.8213	18.5699	5.75257	5.08692	0
J39-u-14.0	97178.4	6615.5	93.9909	18.1302	25.2099	18.7336	6.13372	5.48766	0
J39-u-30.0	97876.1	6632	94.2169	18.3983	25.1373	18.2997	9.12722	7.86452	0
J39-u-45.0	98067.8	6647.2	94.4251	18.7235	26.8792	20.8731	7.09345	6.10761	0
J39-u-62.0	98609.7	6665.5	94.6759	19.067	27.5235	20.8096	8.7992	8.20632	0
J39-u-78.0	99111.2	6682	94.9019	18.6738	26.5043	21.1375	7.85445	6.43304	0.360844
J39-u-90.0	99290.9	6694	95.0663	18.4086	27.1781	20.8877	8.09799	8.09204	0
J40-o-63.0	99485.4	6715.5	95.3609	18.1621	25.8711	20.1945	9.191	5.49847	0
J40-o-79.0	99554.3	6730.5	95.5664	18.2571	26.6631	21.0081	8.31322	7.12989	0.445435
J40-o-95.0	99632.4	6747	95.7924	17.7642	27.337	22.1069	8.22647	8.25072	0
J40-u-11.0	99663.5	6764.5	96.0322	16.9178	25.6971	20.1573	7.83549	7.21866	0.39375
J40-u-27.0	99761.8	6780.8	96.2555
J40-u-43.0	100417	6796.2	96.4664	19.1393	27.1912	21.316	8.52751	5.04791	0
J40-u-59	100794	6812	96.6829
J40-u-75	100897	6828	96.9021	14.7602	23.9058	19.2053	8.51882	7.27366	0
J40-u-92	100919	6843.5	97.1145
J41-u-24	100968	6867.3	97.4405	14.6921	23.5248	19.0866	7.76761	6.01274	0
J41-u-40	101067	6883.5	97.6625
J41-u-56	101233	6900.5	97.8954	15.9959	25.6186	21.8879	6.46015	5.5035	0
J41-u-72	101340	6916.5	98.1146
J41-u-86	101434	6930.5	98.3064	14.9519	23.5624	19.1566	7.20674	6.27623	0
J42-o-79.6	101439	6942.1	98.4653
J42-o-80	101444	6942.5	98.4708	13.5174	23.1712	19.6051	7.62604	6.77253	0
J42-o-80.2	101449	6942.7	98.4735
J42-o-80.4	101454	6942.9	98.4762	14.4914	24.1556	19.5461	6.25544	6.89578	0.429934
J42-o-80.8	101459	6943.3	98.4817
J42-o-81.3	101464	6943.8	98.4886	14.4314	23.636	19.758	7.85035	5.39368	0
J42-o-81.8	101469	6944.3	98.4954
J42-o-82.1	101474	6944.6	98.4995	14.8129	24.098	20.8112	6.91802	7.65284	0.412043
J42-o-82.3	101479	6944.8	98.5023
J42-o-82.5	101484	6945	98.505	12.5741	23.6166	21.0445	7.03454	5.42946	0
J42-o-82.7	101489	6945.2	98.5077
J42-o-83	101569	6945.5	98.5119	13.9088	23.2536	20.397	7.82504	6.59344	0
J42-o-83.2	101574	6945.7	98.5146
J42-o-83.4	101579	6945.9	98.5173	15.1692	25.2234	22.2339	7.83688	5.46774	0
J42-o-83.7	101584	6946.2	98.5214
J42-o-83.9	101589	6946.4	98.5242	11.9762	21.1804	18.2162	7.47156	7.1265	0
J42-o-84.1	101594	6946.6	98.5269
J42-o-84.35	101599	6946.85	98.5303	14.2122	24.6909	21.0307	7.14789	4.39942	0
J42-o-91.95	101604	6954.45	98.6345
J42-o-92.35	101609	6954.85	98.6399	13.1588	23.6569	20.8594	6.35352	5.48497	0
J42-o-92.75	101614	6955.25	98.6454
J42-o-93	101619	6955.5	98.6489	13.7062	23.9727	20.5422	6.23119	7.92869	0
J42-o-93.2	101624	6955.7	98.6516
J42-o-93.4	101629	6955.9	98.6543	12.7442	22.807	19.8135	6.74521	7.60885	0
J42-o-93.6	101634	6956.1	98.6571
J42-o-96.3	101639	6958.8	98.6941	14.3613	24.6148	20.5643	5.82119	5.10432	0
J42-o-96.6	101644	6959.1	98.6982
J42-o-97	101649	6959.5	98.7037	15.1108	25.5031	21.2219	6.4994	5.71849	0.39841
J42-o-97.2	101654	6959.7	98.7064
J42-o-97.5	101659	6960	98.7105	14.5764	25.2545	21.3424	5.86139	4.85217	0
J42-o-97.7	101664	6960.2	98.7132
J42-o-97.9	101669	6960.4	98.716	15.3442	24.7114	20.8372	8.31268	5.34533	0
J42-u-4	101694	6964	98.7653
J42-u-20	102010	6980.5	98.9914	16.7103	24.8979	20.19	9.89842	7.84877	0
J42-u-36	102240	6997	99.2174
J42-u-52	102541	7014	99.4503	12.1212	21.8879	18.3931	8.36159	9.70194	0
J42-u-72	102554	7036.5	99.7586
J43-u-92.5	102569	7104.75	100.694	9.59535	20.4941	18.3621	5.33756	6.20922	0.825723
J44-u-63	102723	7173	101.629
J44-u-79	103024	7189.2	101.851	11.1222	21.0225	17.7529	6.69192	8.23413	0
J 45-o-68	103274	7206	102.081
J 45-o-84	103516	7220.5	102.279	9.28481	18.0273	13.9042	7.90739	10.3398	0.450377
J 45-o-98	103703	7234	102.464
J 45-u-12	103864	7248.5	102.663	11.2227	17.9475	13.9531	8.81246	13.1422	0
J 45-u-28	104052	7263.7	102.871
J 45-u-44	104314	7280	103.095	12.9341	19.9636	14.2361	8.81054	11.3595	0
J 45-u-56	104672	7293	103.273
J 45-u-68	105020	7306	103.451	15.0579	24.6663	20.5096	8.08871	8.36951	0
J 45-u-84	105570	7322.8	103.681
O 48u-88.6	105572	7329.1	103.767	14.5224	23.6657	20.9381	5.51463	9.27141	0
O 49u-19.3	105745	7345.3	103.989
M 50u-21.5	106314	7365.5	104.266	18.5548	26.2903	22.2098	6.21402	8.50811	0
M 50u-28	106721	7372.5	104.362
O-49u-52	106849	7378	104.437	14.1049	21.5483	20.1635	7.89	10.656	0
M 50u-38.7	106849	7382.2	104.495
M 50u-60.7	107377	7404.2	104.796	11.3826	17.5978	12.5535	10.6468	13.5133	0.502836
O-49u-90	107544	7416	104.958
M 50u-73.8	107579	7417.3	104.976	12.0521	16.6087	9.88193	11.8251	13.8404	0
?M 50u-??	107673	7427	105.108	11.6988	18.0242	13.6114	11.786	16.7692	0.456912
O 50u-12.8	107805	7436.3	105.236	10.008	14.7136	11.6164	10.9638	15.9282	0
O 50u-15	107824	7439	105.273	10.0129	16.1371	11.5196	11.2104	17.0882	0.577832
M 50u-100.7	107906	7445.7	105.365	8.82148	13.3121	9.08645	10.7637	18.0581	0.657952
M 51u-21.3	107988	7455.8	105.329	10.6012	16.96	13.093	10.8805	15.9033	0
M 51u-25.5	108039	7460.5	105.389	7.97254	13.6344	9.49028	10.8762	16.946	0.5
M 51u-29.6	108039	7464.1	105.435	9.79273	15.6513	11.395	9.77478	16.287	0.663723
M 51u-42.6	108127	7477.1	105.601	9.84138	17.0005	15.0243	10.0407	16.6082	0.483368
M 51u-46.4	108148	7480.9	105.65	12.05	19.6445	16.032	9.42824	13.6119	0
O-50u-51	108148	7482	105.664	14.2675	21.173	17.8502	8.86856	12.0903	0
M 51u-60.8	108166	7495.3	105.834	13.4982	21.4802	18.489	10.0877	14.1895	0.444554
M 56u-8.5	108425	7733	108.877	10.2217	18.3309	16.1415	9.2829	16.5627	0.580259
M 56u-29.1	108425	7753.6	109.141	11.1385	19.9122	16.5149	9.80641	12.7215	0
M 56u-47.8	108425	7772.3	109.38	10.4192	16.6919	13.139	10.4401	16.4675	0.444116
M 56u-56.2	108425	7780.7	109.488	10.7172	17.1665	14.0342	9.41923	18.4096	0.492068
M 56u-64.6	108440	7788	109.581	8.2461	12.1906	8.44609	10.1431	18.2226	0
M 56u-67.7	108454	7792.2	109.635	10.8849	21.5841	21.466	6.67353	11.6317	0
M56u-72	108468	7796.5	109.69	10.0042	15.8303	12.2261	9.30875	19.2215	0.478913
M56u-76.3	108491	7798	109.709	9.05506	13.026	8.81997	10.7694	17.1637	0
M56u-77.8	108491	7807.5	109.386	9.2209	15.555	12.2303	9.94974	16.4269	0.435194
M 56u-87.4	108543	7811.9	109.513	10.59	17.6857	14.1647	9.27698	14.9036	0.417392
M56u-90.25	108566	7814.75	109.595	8.73741	15.2241	12.7258	9.11054	15.2095	0.691714
M 56u-94.5	108610	7819	109.717	13.1496	18.2598	14.4259	10.2594	14.7238	1.10297
M56u-97.8	108677	7822.3	109.812	11.5812	17.865	13.7087	11.6222	16.7814	0
M 56u-102	108757	7827	109.948	9.03574	14.29	10.3289	10.6174	18.8871	0
O- 54u-43.1	108824	7829.6	110.022	12.3326	17.9208	14.0201	11.1405	15.1058	0.478365
O- 54u-45.7	108824	7832.2	110.097	13.0754	19.45	14.5518	11.0904	14.7735	0.39841
M 58o-20.9	108972	7853.9	110.722	9.97482	17.232	14.5745	8.61483	14.8946	0
M 58o-42.6	109025	7862.5	110.97	9.59994	15.8348	13.2818	10.628	18.3169	0.448561
M58o-36.75	109041	7869.75	111.179	15.2616	21.4613	17.7344	11.5145	11.7712	0.750587
M 58o-39.1	109052	7872.1	111.246	13.3507	23.015	19.4692	8.7975	9.8494	0
M 58o-41.45	109052	7876.7	111.379	12.5453	17.7745	13.5482	11.7932	15.4713	0.433963
M 58o-46.2	109070	7879.2	111.451	13.1198	19.524	14.7125	11.1268	12.9772	0
M 58o-48.7	109105	7890.8	111.785	12.9102	19.6782	14.6067	10.7662	12.0379	0.503793
M 58o-60.1	109116	7893.1	111.851	14.2297	21.3444	17.1963	10.9986	13.9754	0.556415
M 58u-4.4	109144	7901.4	112.09	16.3498	23.433	17.9583	10.3991	9.97411	0
M 58u-9.5	109159	7906.5	112.237
M58u-11.25	109161	7908.25	112.288	16.3391	22.9139	18.926	11.9679	12.2538	0
M 58u-13.75	109172	7910.8	112.361
M 58u-15.5	109174	7912.5	112.41	15.801	24.4526	20.5254	9.19938	9.97638	0
O- 56u-40.5	109228	7931.5	112.957
O- 56u-43.4	109237	7934.4	113.041	15.9506	21.65	15.5296	9.78611	9.27026	0.508329
M58u-44	109266	7941	113.231
O- 56u-50.1	109267	7941.1	113.234	14.4692	21.3989	15.8494	11.6635	12.3059	0
O- 56u-53.4	109274	7944.4	113.329
O- 56u-59.7	109308	7950.7	113.51	14.9724	21.2398	14.6078	11.5467	12.5875	0
O- 56u-62.1	109328	7953.1	113.579
O- 56u-68.3	109368	7959.3	113.758	15.0051	21.4805	15.1229	10.5307	13.2772	0
O- 56u-76	109412	7967.5	113.994
O- 56u-81.4	109412	7972.4	114.135	16.7553	25.2047	18.0145	8.07444	9.80693	0
M58u-76	109412	7973	114.152
O- 56u-92.5	109421	7983.5	114.455	16.8227	25.4204	19.6863	8.61183	8.5698	0
M 63u-68.5	109559	7998	114.872
M59u-10.5	109807	8000.5	114.944	18.0473	23.8625	16.3359	9.15728	8.18275	0
M 63u-80.5	110208	8010	115.218
O- 58o-31.5	110433	8019	115.477	13.9328	21.8815	19.822	8.35747	17.1672	0
O- 58o-71.4	110434	8023.9	115.618
O 58o-76.4	110467	8028.9	115.762	15.4363	22.8653	17.9119	6.49389	4.98116	0
O 58o-84	110527	8037	115.996
O 58o-85.8	110717	8038.3	116.033	16.8253	24.8201	20.0124	9.81394	8.06578	0.450377
O 58o-90.8	111135	8043.3	116.177
O 58o-98.4	111135	8050.9	116.396	19.6221	26.5716	18.7864	7.85752	4.74448	0
O 58u-7.5	111650	8062	116.716
O 58u-10.5	111857	8065	116.802	16.8432	24.5944	18.8586	7.87876	5.89709	0.497519
O 58u-13.5	112152	8068.5	116.903
O 58u-16.5	112324	8071.5	116.989	20.6376	26.893	20.2075	10.0941	6.97366	0.446767
O 58u-26.7	112613	8081.2	117.269
O 58u-32.9	112613	8087.4	117.447	18.8399	25.9783	18.8866	7.90217	7.31058	0
O 58u-37.25	112697	8091.75	117.572
O 58u-42	112967	8096.5	117.709	19.1935	26.0151	19.0683	10.7011	8.32474	0.427179
O 58u-46	113086	8100.5	117.824
O 58u-51	113411	8105.5	117.968	16.2309	24.7174	18.4021	9.13039	8.60513	0.613139
O 58u-52	113431	8106.5	117.997
O 58u-60	113652	8114.5	118.228	17.2199	26.3514	21.4962	7.77823	4.9298	0
O 58u-65	113704	8119.5	118.372
O 60u-6.5	113937	8147	119.164	18.5386	26.3553	19.7863	8.70146	7.3612	0.428746
O 60u-19.5	114225	8160	119.538
O 60u-28.5	114923	8169	119.797	17.6972	27.2093	21.6726	9.0038	4.57612	0
M 64u-64	115803	8182.5	120.186
O 60u-46.8	115803	8187.3	120.324	14.8699	24.971	23.1275	7.32179	6.5168	0
O 60u-57	116150	8197.5	120.618
O 60u-61.1	116510	8201.6	120.736	12.8036	23.4974	22.4152	7.3362	8.22406	0
O 60u-64.2	116724	8204.7	120.825
O 60u-73.4	117072	8213.9	121.09	14.0383	24.1662	23.7083	5.4086	8.06631	0
O 60u-79.4	117530	8219.9	121.263
O 60u-84.4	117788	8224.9	121.407	12.9429	22.8923	22.1012	8.04775	8.68605	0
O 60u-95.5	118474	8236	121.727	11.1748	21.1539	20.8226	6.96282	12.1424	0
O 62u-7.5	119203	8249	122.101	12.6546	22.6658	23.3647	6.85419	9.36421	0.421825
O 62u-14.5	119404	8256	122.303	11.7144	22.1456	22.2765	7.0614	8.7064	0
O 62u-21.5	119417	8263	122.504	10.5102	20.2893	21.1749	7.30068	8.65032	0
O 62u-25.7	119490	8267.2	122.625	11.0839	21.4358	21.6637	6.4901	8.2481	0.425243
M 65u-72	119749	8275.5	122.864	11.6723	22.0492	22.8273	6.23723	7.47806	0
M 65u-76.8	119825	8280.3	123.003	12.7601	23.1864	23.6102	7.31683	6.71676	0
O62u-45	120055	8286.5	123.181	10.1795	20.9639	21.0567	6.42073	8.3425	0
O62u-53.5	120454	8295	123.426	12.7038	23.9787	24.0636	6.88012	7.61394	0
O 62u-61.5	120760	8303	123.656	14.5777	25.6201	23.3925	5.39915	6.60392	0
O62u-64.5	120897	8306	123.743	13.159	24.7581	23.728	4.67745	9.96944	0
O63u-10.5	121524	8323.5	124.247	10.7643	22.2201	20.5637	5.23666	10.4814	0
O63u-22.5	121524	8335.5	124.592	9.2182	20.211	21.0515	3.85775	8.56517	0
O63u-30.5	121524	8343.5	124.823	10.0497	21.5703	22.6616	4.85564	10.3466	0.449467
O63u-42.5	121621	8355.5	125.168	11.642	22.4111	22.3207	3.68178	9.33666	0
M 69u-41	121906	8368	125.528	9.33887	19.6222	21.5088	3.04004	8.50368	0.542326
M 69u-46.9	122043	8373.9	125.698	7.37554	18.9109	20.8426	4.02095	8.13384	0
O 63u-81.5	122562	8394.5	126.292	9.5711	19.6911	21.455	5.38937	11.2647	0
O 63u-91.6	122894	8404.6	126.582	9.23659	20.1567	21.123	4.40072	9.78503	0
O 65o-67.5	123066	8412	127.399	6.9759	19.3838	21.3816	4.73547	8.21477	0
O 65o-72	123231	8416.5	127.417	9.67718	20.3847	22.0479	6.128	10.7899	0.464238
M 70u-28	123307	8422.5	127.441	8.91697	18.9494	19.4613	6.46573	10.9846	0
O 65o-78.5	123428	8423	127.443	7.21594	17.9697	19.6233	6.03395	11.4487	0
O 65o-80.5	123513	8425	127.451	7.58936	17.3706	19.0875	5.99535	13.2799	0
O 65o-83.8	123666	8428.3	127.464	8.79947	19.245	21.6186	6.32922	14.8759	0
O 65o-87.6	123770	8432.1	127.479	9.54026	19.3472	19.4863	6.89712	11.2808	0
O 65o-89.6	123846	8434.1	127.487	9.42972	18.8875	19.3038	5.95406	11.9836	0
O 65o-98.7	124069	8443.2	127.524	8.38609	17.5547	17.4095	6.8619	12.2856	0
O 65u-0.7	124103	8445.2	127.532	8.15852	17.4125	19.2544	6.72611	13.5491	0
O 65u-9.8	124194	8454.3	127.568	8.35892	17.4919	18.7305	7.1247	13.9634	0
O 65u-11.8	124214	8456.3	127.576	9.37143	18.621	19.9599	6.91981	15.1282	0
O 65u-13.8	124278	8458.3	127.584	9.59406	18.5842	20.1313	7.31263	14.8444	0
M 70u-70	124286	8460	127.591	7.15357	15.5743	17.5743	7.38915	17.3925	0
O 65u-16.9	124327	8461.4	127.597	8.01189	16.0359	17.0785	7.49287	16.3133	0
O 65u-31.1	124336	8475.6	127.653	8.28952	17.3635	19.0501	7.25436	16.7768	0
O 66o-68.6	124385	8497.1	127.739	6.99028	15.7363	16.5227	7.42175	14.7499	0
O 66o-71.6	124418	8500.1	127.751	8.26329	17.7572	18.2478	6.49118	14.1194	0
O 66o-76.7	124450	8505.2	127.772	8.06376	16.8718	18.3953	7.44254	16.0222	0
O 66o-87	124517	8515.5	127.813	9.71557	17.6456	19.0877	7.03856	16.5809	0
O 66u-4.5	124856	8534.5	127.889	9.41532	18.302	19.4684	6.19014	13.1067	0
M 72o-29.4	125039	8554.9	127.971	7.6324	16.5338	17.4583	6.72046	14.1126	0
M72o-34	125114	8559.5	127.989	8.53111	18.1805	19.7592	6.19198	11.7468	0
O 67o-35.5	125279	8571.5	128.037	8.85652	17.9349	18.7188	6.66616	14.7721	0
O 67o-40.5	125357	8576.5	128.057	9.93777	18.6808	19.2545	7.41964	14.8388	0
O 67o-50.1	125542	8586.1	128.095	8.10337	17.0578	18.0172	6.42905	14.048	0.443678
O 67o-60.8	125835	8596.8	128.138	7.21927	16.3113	17.852	4.67013	14.5146	0
O 67o-64.8	125865	8600.8	128.154	8.14533	18.0172	17.6626	7.08141	12.7777	0
O 67o-79.6	126100	8615.6	128.213	6.54669	15.7871	16.4882	5.61501	11.2638	0
O 67o-90.9	126252	8626.9	128.259	7.02622	15.8955	17.1294	5.86842	14.1109	0
O 67u-0.6	126319	8636.1	128.295	7.4269	16.1821	15.8826	6.56354	11.8648	0
M72u-32	126341	8643.5	128.325	5.16771	14.3252	16.5236	5.70804	12.6959	0
O 67u-20.8	126792	8656.3	128.376	6.79487	15.8831	15.3142	7.28209	13.129	0.402259
O 67u-26.8	126984	8662.3	128.4	3.67151	12.3517	13.8122	4.13118	12.0722	0
O 67u-31.9	127125	8667.4	128.421	6.01446	14.9995	14.6585	5.23799	12.3109	0.658665
O 67u-39.1	127224	8674.6	128.449	4.65839	14.0106	13.9492	5.12076	10.0967	0
O 67u-39.9	127274	8675.7	128.454	4.59195	13.2826	13.6186	5.21621	11.4339	0
O 68o-56.5	127310	8691.5	128.517	4.42907	12.5777	13.3421	6.04752	14.0257	0
O 68o-60.7	127342	8695.7	128.534	4.76947	13.1844	12.8361	4.56987	15.7898	0
M72u-90	127359	8701.5	128.557	4.31574	12.9555	11.7991	5.75743	12.7991	0
M 72u-93	127379	8704.5	128.569	4.75006	12.557	12.3595	5.99913	15.923	0
M 73o-83.5	127446	8718	128.623	5.12379	12.0273	11.8056	5.47797	16.1337	0.439799
M 73u-3.5	127525	8733.5	128.685	5.16975	12.4144	11.7509	5.70809	15.3224	0.445878
M 73u-13.6	127541	8743.1	128.723	3.94262	11.7578	11.5855	4.27934	16.8888	0.415945
M73u-29.75	127606	8759.25	128.788	3.75194	9.32629	8.89233	6.03187	19.1454	0
M 73u-31.8	127622	8761.3	128.796	4.14212	10.2042	9.17462	4.11839	17.3463	0
M 73u-33.2	127656	8762.7	128.802
M 73u-50	127687	8779.5	128.869	5.69385	12.3928	11.8825	6.10106	17.499	0
M 73u-76.5	127745	8806	128.975
M 74u-12.5	127889	8829	129.067	4.61974	10.29	9.26851	6.21772	18.6955	0
M 74u-24.7	127958	8841.2	129.116
M 74u-34.5	128055	8851	129.155	3.25908	9.32626	9.06533	5.26356	16.7731	0.445435
M 74u-40.6	128088	8857.1	129.179
M 74u-45.1	128143	8861.6	129.197	4.23989	10.9712	10.5305	6.97439	16.9042	0.681994
M 74u-48.6	128197	8865.1	129.211
O69u-47	128218	8868	129.223	3.97837	9.66194	9.30272	7.17372	17.702	0
M 74u-52.7	128236	8869.2	129.228
M 74u-65	128440	8881.5	129.277	3.11273	8.53478	7.3788	6.17266	17.5362	0
M 74u-70	128569	8886.5	129.297
M 74u-85.3	128863	8901.8	129.358	4.21818	8.73867	7.98381	8.09299	18.6414	0
M 75u-12.5	128961	8924	129.447
M 75u-33.6	128966	8945.1	129.531	5.28539	8.6668	7.10913	7.37106	19.3072	0
M 75u-52.7	129455	8964.2	129.608
M75u-58.25	129612	8969.75	129.63	5.67965	8.73934	6.47961	8.15024	18.0791	0
M 75u-71.6	129887	8983.1	129.683
M 75u-90.3	130028	9001.8	129.758	3.2032	6.26421	5.14196	7.56253	17.5662	0
M 76u-9.3	130095	9020.3	129.832
M 76u-27.5	130095	9038.5	129.905	5.18788	8.02566	6.12367	8.20616	20.0302	0.508329
M 76u-48.7	130291	9059.7	129.99
M76u-60.75	130506	9071.75	130.038	2.88326	6.25419	4.3127	7.51304	19.4961	0
M 76u-64	130551	9075	130.051
M 76u-84	130755	9095	130.131	3.48681	6.37342	4.84979	8.41039	19.69	0
O 71o-2.6	131002	9172.1	130.439
O71o-21.65	131066	9192.2	130.52	2.38262	4.48936	3.59155	7.93188	21.1841	0
O 71o-27.9	131119	9199.4	130.549
O 71o-45.5	131256	9217	130.619	3.04643	5.11058	3.90497	8.30398	20.4315	0
M77u-67	131336	9229.5	130.669
O 71o-61.8	131370	9232.8	130.682	3.06456	6.68679	6.68679	6.27612	16.4392	0
O 72u-25.7	131453	9296.2	130.936
O 72u-49.1	131514	9320.1	131.031	4.61774	5.89289	4.08955	8.58318	18.4676	0
O 72u-72.8	131552	9344.3	131.128
O 72u-88.6	131597	9360.6	131.193	1.54303	3.65086	2.87934	7.96775	19.9853	0
O 73o-15	131645	9397.5	131.341
M 79u-3.5	131709	9458.5	131.585	3.08189	4.56848	3.28106	8.24956	17.8817	0.743294
M 80o-44.5	131715	9513	131.803
O 74o-55.5	131801	9532.5	131.881	2.72076	4.62105	2.95438	8.73773	17.556	0.527046
O 74u-15	131922	9590.5	132.113
O 74u-93	132164	9668.5	132.425	2.56495	4.91576	3.37679	7.08779	17.9437	0
O 75o-21	132227	9690.5	132.513
O 77u-44.5	132313	9736	132.695	2.52578	3.05954	2.13504	8.72249	19.4049	0
O 80u- 16.5	132386	9792.5	132.921
O 80u- 35.5	132413	9814	133.007	3.1977	4.13429	2.26112	5.22856	19.1176	0
O 80u- 71.5	132454	9848.5	133.145
O 80u- 90.5	132487	9867	133.219	2.2711	3.21182	1.88144	5.74275	19.2205	0
O 82o-29.5	132523	9901	133.355
O 81u-45.5	132537	9916.5	133.417	0	0.995037	0.995037	6.60033	18.7098	0
O 81u-67.5	132586	9933.5	133.485
O 83u-59	132647	9974	133.647	6.65468	11.1773	7.53778	7.27913	15.1728	0
O 83u-80	132679	9995	133.731
O 86u-75.5	132794	10147.5	134.341	3.31618	4.68978	3.31618	5.8246	19.5242	0
O 86u-89.5	132809	10160.5	134.393	1.25988	1.25988	0	6.75158	18.528	0

## Sheet: Ioannina
Depth (m)	Deoth (m)	Age (ka BP)	boreal forest	temperate forest	warm-temperate forest	tundra	grassland and dry shrubland	desert
2.04	2.04	1.333	2.34834	5.87607	5.47316	0.569803	9.3806	0
2.44	2.44	1.422	3.05932	7.56854	7.56854	0	5.43877	0
2.86	2.86	1.516	4.67114	9.02169	9.4259	1.14331	9.44608	0
3.25	3.25	1.604	5.10143	8.39842	8.97253	2.14395	10.7612	0
3.63	3.63	1.689	5.46789	7.96843	7.79877	2.16186	7.036	0
3.95	3.95	1.761	5.27409	8.77238	8.77238	3.1439	5.36956	0
4.43	4.43	1.868	5.89805	8.64481	8.64481	1.68364	4.16096	0
4.84	4.84	1.96	2.1744	5.35785	5.35785	0.567962	4.47458	0
5.22	5.22	2.045	2.58646	8.33833	8.50536	0.806478	7.21777	0
5.6	5.6	2.13	5.52239	12.3852	12.8874	1.87145	8.9739	0
5.86	5.86	2.189	5.89518	14.4578	14.4578	1.86834	10.0703	0
6.4	6.4	2.31	5.32525	16.1334	16.5035	2.37609	6.23603	0
6.7	6.7	2.377	6.79799	18.3507	19.0414	1.64399	7.16213	0
7.6	7.6	3.227	6.11131	15.9222	16.7675	2.23278	8.78777	0
8.05	8.05	4.057	7.67428	15.3674	15.3674	2.9143	8.57721	0
8.34	8.34	4.592	3.58556	9.00179	9.01707	1.67356	9.29526	0
8.84	8.84	5.514	6.90097	17.1763	17.0729	3.22652	8.98744	0
9.2	9.2	6.178	7.71247	19.0669	20.5732	1.77469	7.6912	0
9.66	9.66	6.611	9.05878	20.0111	19.5783	1.93447	2.8149	0
10.08	10.08	7.007
10.46	10.46	7.365	7.39731	19.0744	18.2875	1.13137	5.64254	0
10.87	10.87	7.751
11.07	11.07	7.939	9.21414	20.1332	19.3214	2.07018	4.45711	0
11.2	11.2	8.061
11.35	11.35	8.203	8.08373	18.5516	17.6558	2.08393	4.26126	0
11.5	11.5	8.344
11.83	11.83	8.644	8.75777	19.6454	19.1441	1.61515	5.85669	0
12.05	12.05	8.843
12.11	12.11	8.898	6.15616	17.8623	17.1639	0.982156	3.53988	0
12.42	12.42	9.179
12.5	12.5	9.252	8.18025	19.645	18.012	1.85846	4.65973	0
12.58	12.58	9.324
12.65	12.65	9.388
12.77	12.77	9.497	6.62958	17.5607	16.6403	1.1094	4.67735	0
13.15	13.15	9.842
13.2	13.2	9.887
13.31	13.31	9.987	7.53254	17.5239	16.388	2.1744	9.11338	0.567962
13.4	13.4	10.069
13.51	13.51	10.169
13.63	13.63	10.278	9.628	18.9765	16.942	2.38591	7.79405	0
13.68	13.68	10.323
13.77	13.77	10.405
13.8	13.8	10.432	7.07878	17.6782	16.8735	0	6.01053	0
14.06	14.06	10.668
14.1	14.1	10.704
14.25	14.25	10.84	8.39289	18.2901	16.653	0	7.34619	0
14.28	14.28	10.868
14.33	14.33	10.913
14.38	14.38	10.958	9.06704	18.3139	17.5017	1.25294	5.86337	0
14.43	14.43	11.004
14.5	14.5	11.067
14.55	14.55	11.113	8.95803	19.4701	17.1807	1.449	5.46982	0
14.66	14.66	11.213
14.74	14.74	11.285	11.2154	20.5598	17.8502	2.62222	5.97477	0
14.8	14.8	11.34	8.06873	17.1463	15.4548	1.9624	7.44577	0
15.02	15.02	11.539	5.60739	12.5746	11.5129	0.982946	11.0932	0
15.1	15.1	11.612	6.86191	13.6136	12.6353	3.23736	12.2056	0
15.24	15.24	12.066	6.47915	13.0899	11.3205	1.76937	10.7242	0.546767
15.28	15.28	12.195	5.55399	12.078	10.9022	2.44668	12	0
15.33	15.33	12.357	5.037	11.6479	9.96291	1.12331	9.43208	0
15.36	15.36	12.455	8.27431	15.0007	13.0807	1.92006	9.58413	0
15.4	15.4	12.584	7.88886	15.5019	13.5267	2.54777	10.8524	0
15.5	15.5	12.908	8.77198	16.8894	14.3144	1.66282	9.54578	0
15.61	15.61	13.265	6.81674	13.8261	12.0027	1.53934	8.78721	0.563436
15.67	15.67	13.459	5.34691	10.8663	9.16237	1.93914	9.74364	0
15.71	15.71	13.589	5.957	11.6003	9.90995	1.36242	9.01504	0
15.8	15.8	13.88	6.351	11.5429	10.4124	2.26093	11.0896	0
15.92	15.92	14.269	5.78413	12.353	10.8636	1.88842	10.4155	0
15.99	15.99	14.496	5.25422	12.1042	10.9664	2.8444	11.0107	0
16.07	16.07	14.755	3.8877	8.86714	8.06197	1.94385	10.3997	0
16.17	16.17	15.079	4.74734	8.90865	7.91642	2.0516	11.6495	0.39133
16.21	16.21	15.209	5.13678	10.2286	7.98257	1.7933	10.263	0
16.3	16.3	15.501	4.57813	10.0785	9.17318	1.95497	12.1892	0
16.36	16.36	15.695	5.62937	9.97045	7.78276	2.01247	11.4228	0
16.42	16.42	15.89	5.08084	9.28064	7.56037	1.72027	11.9909	0.947027
16.5	16.5	16.149	5.81851	10.0885	8.10589	2.59217	12.8506	0.529627
16.56	16.56	16.343	6.4017	11.4253	9.83547	1.35703	11.4203	0
16.61	16.61	16.505	3.80279	8.62681	6.55751	1.7335	10.8547	0
16.68	16.68	16.732	5.0004	9.07974	6.66084	2.5815	10.6117	0.555127
16.85	16.85	17.283	5.46642	10.4457	8.52236	2.29984	11.7579	0
17.07	17.07	17.996	5.61239	9.25206	7.36878	2.59227	11.859	0
17.17	17.17	18.32	5.32667	9.52668	8.26209	1.13684	12.4002	0
17.29	17.29	18.422	5.51001	9.1143	7.38496	1.55464	12.1237	0
17.41	17.41	18.525	4.50553	7.91975	6.93362	0.569341	12.187	0
17.5	17.5	18.601	3.50733	6.22898	4.38832	0.96225	14.0865	0
17.59	17.59	18.678	5.70665	9.34003	7.56133	1.87662	11.6054	0
17.77	17.77	18.832	6.07053	9.37962	7.41559	1.83648	10.1799	0.802572
17.94	17.94	18.977	5.20453	8.26254	5.88452	2.42444	10.4008	0
18.01	18.01	19.036	8.86168	12.0679	8.88059	3.75071	10.2981	0
18.44	18.44	19.403	5.60221	9.00998	7.0508	2.27185	10.3956	0.567962
18.5	18.5	19.454	5.50171	8.99504	5.82223	2.00837	8.94443	0
18.79	18.79	19.701	5.41908	8.63416	5.99582	2.5422	9.74869	0
19.19	19.19	20.043	4.49163	6.84141	4.41677	2.57304	10.7851	0.553849
19.59	19.59	20.384	6.79918	9.82855	7.29891	2.81885	10.2896	0.577832
20.04	20.04	20.767	4.75655	7.93209	4.33508	1.58396	8.61157	0
20.29	20.29	20.981	5.97945	9.26306	7.18291	2.08015	10.8787	0
20.4	20.4	21.074	4.41796	6.80042	4.11596	1.5288	10.3726	0
20.54	20.54	21.194	7.19175	9.76347	7.52227	2.04098	10.0949	0.514344
20.64	20.64	21.279	5.79095	8.1654	5.67552	1.87906	13.1315	0
20.73	20.73	21.356	7.25376	9.48982	7.19883	2.10749	10.7478	0
20.82	20.82	21.433	5.2773	8.38403	6.10768	2.34794	10.641	0.554274
20.89	20.89	21.492	6.97714	9.18409	6.65643	1.78546	12.0406	0
21.1	21.1	21.671	6.49324	9.16232	6.51064	1.02733	10.8339	0
21.2	21.2	21.757	7.15336	9.71003	7.57092	1.74658	9.04374	0.555127
21.25	21.25	21.799	5.28507	8.29743	5.9282	2.18915	11.1018	0
21.44	21.44	21.961	6.03257	8.35567	6.58295	1.53934	8.58001	0
21.6	21.6	22.098	5.8921	9.90014	7.53659	2.18389	10.8868	0
21.68	21.68	22.166	4.9989	7.65165	5.35402	1.25098	9.8202	0
21.84	21.84	22.302	6.55309	10.23	8.07758	2.31602	8.37014	0
22.04	22.04	22.473	6.11293	9.16904	7.1626	1.93758	13.0053	0
22.07	22.07	22.498	6.10934	8.03384	5.7313	1.29749	9.66031	0
22.23	22.23	22.635	3.54574	5.38831	3.36038	1.24226	10.4285	0
22.37	22.37	22.754	4.7018	7.39271	5.196	1.93758	10.0126	0
22.67	22.67	23.01	4.88753	6.70367	4.9014	0.547586	12.6134	0
22.76	22.76	23.087	5.19985	7.84779	5.52196	1.55055	13.508	0
22.87	22.87	23.181	5.59752	7.6908	6.12104	1.67576	12.0668	0
23.01	23.01	23.3	6.12837	9.26025	7.29706	1.4571	14.3238	0.376222
23.07	23.07	23.393	4.31091	6.36724	5.65007	0.946932	14.2241	0
23.21	23.21	23.61
23.33	23.33	23.796	5.24145	7.58963	6.00337	1.81878	11.8986	0
23.37	23.37	23.858
23.6	23.6	24.215	4.04694	7.2247	5.51565	1.93089	12.1419	0
23.65	23.65	24.292
23.7	23.7	24.37	5.78178	9.33323	6.83019	1.37795	13.8949	0
23.8	23.8	24.525
23.85	23.85	24.602	7.36405	11.1446	9.41727	2.35613	14.0932	0.533761
24	24	24.835	8.14239	13.4452	11.7468	2.83069	12.8428	0
24.05	24.05	24.912	10.7956	15.2032	12.217	3.41984	14.567	0
24.2	24.2	25.145	8.64024	12.2537	10.4782	2.9042	12.7438	0
24.4	24.4	25.455	7.02159	12.531	9.77603	2.39055	11.8912	0
24.5	24.5	25.61	7.22225	12.3041	10.5035	1.66924	13.9255	0.393445
24.6	24.6	25.765	7.54429	12.4201	10.753	2.50729	12.0573	0
24.7	24.7	25.92	6.9241	12.3584	10.0169	0.562544	11.6369	0
24.8	24.8	26.075	6.83332	11.2294	8.96121	2.69376	12.9532	0
24.9	24.9	26.23	7.95241	13.8499	12.5368	2.81839	13.6249	0
25	25	26.385	7.40096	12.8676	11.4897	1.5369	12.8513	0
25.1	25.1	26.54	7.17704	12.8475	10.0123	3.305	10.5467	0
25.2	25.2	26.695	5.38097	10.8016	8.73095	1.13592	10.6797	0
25.3	25.3	26.85	8.23432	12.2491	9.97322	2.37805	13.2127	0.573539
25.4	25.4	27.005	6.65097	11.9025	10.3998	1.93914	11.057	0
25.5	25.5	27.16	8.16582	13.3001	11.0205	2.40223	12.5928	0
25.6	25.6	27.315	7.70673	12.6752	11.4233	2.32146	10.7893	0.559893
25.7	25.7	27.47	8.8047	13.6068	11.095	3.35203	13.9814	0.561656
25.8	25.8	27.625	6.44783	11.0643	10.0725	1.38237	13.9117	0
25.9	25.9	27.78	8.33973	13.6012	11.1728	2.80676	13.0738	0.784465
26	26	27.935	5.97543	11.0919	8.74705	1.37361	13.4132	0
26.1	26.1	28.09	8.4684	13.5833	11.1175	2.56464	12.6381	0.57639
26.2	26.2	28.245	7.63831	12.5467	9.85493	2.97672	11.7649	0
26.3	26.3	28.4	7.15897	12.1548	9.9839	2.58601	11.5693	0.567048
26.4	26.4	28.555	5.39942	10.4156	8.69496	1.14708	10.3595	0.811107
26.5	26.5	28.71	7.36871	12.3999	10.0623	1.52726	12.2638	0
26.6	26.6	28.865	8.10384	12.9802	10.7809	2.01784	11.5889	0.698999
26.7	26.7	29.02	7.22999	12.8688	10.9542	2.14688	12.0605	0
26.8	26.8	29.175	8.1592	13.8512	11.3551	1.11629	6.3656	0
26.9	26.9	29.33	7.48444	12.4596	10.8901	1.56952	11.4959	0
27	27	29.689	5.63795	9.50305	8.72218	0.956365	12.624	0
27.1	27.1	30.048	5.89235	9.7714	8.84995	2.83304	12.273	0.791808
27.2	27.2	30.406	3.54265	7.85596	7.04082	1.39153	12.3611	0.57639
27.4	27.4	31.124	4.83933	9.09668	7.51554	0.790569	13	1.11803
27.5	27.5	31.483	7.4864	13.3167	11.9072	1.96466	13.3623	0
27.6	27.6	31.842	3.69709	8.50907	7.35629	0	14.0027	0
27.7	27.7	32.2	5.80973	9.73527	8.01748	1.7178	13.6526	0
27.8	27.8	32.559	6.74062	11.3858	9.63521	2.63298	12.3048	0.786889
27.9	27.9	32.918	5.09709	8.65612	6.34672	1.1547	11.6243	0
28	28	33.277	5.07343	10.1003	8.43617	1.1094	10.1842	0.960769
28.1	28.1	33.636	8.22433	13.114	10.5363	1.28885	12.0948	0
28.2	28.2	33.994	8.50638	13.825	11.7453	2.22911	13.2732	0
28.3	28.3	34.353	9.43006	13.961	11.758	1.72631	8.56842	0
28.4	28.4	34.712	5.20742	10.7983	9.17344	2.19937	12.6201	0.574485
28.5	28.5	35.071	5.72705	10.8931	8.80322	2.52307	10.1306	0
28.6	28.6	35.43	4.37794	8.42683	7.28163	0.572598	12.8723	0
28.7	28.7	35.788	5.14226	9.49879	7.86438	2.38653	13.7219	0.807134
28.8	28.8	36.147	6.21053	11.5826	9.62446	1.95819	10.9402	0
28.9	28.9	36.506	5.83362	12.0389	10.985	1.39153	14.0287	0.57639
29	29	36.865	10.7347	15.6955	13.4594	2.31783	11.5927	0
29.1	29.1	37.224	6.79425	11.8634	10.0628	2.99481	15.5444	0
29.2	29.2	37.582	9.43732	14.7622	12.3136	3.38354	11.2482	0
29.3	29.3	37.941	7.46092	12.5584	10.4689	2.60186	13.6986	0.402585
29.4	29.4	38.3	6.1222	11.9919	9.79253	2.43733	11.8873	0.574485
29.6	29.6	39.309	7.65587	9.37086	6.40041	1.9803	11.2386	0
29.8	29.8	40.317	8.13031	12.0075	9.6281	2.52344	11.3807	0.571662
30	30	41.326	5.4679	9.89299	7.8556	1.75607	15.1207	0
30.1	30.1	41.83	8.14783	12.4013	10.0728	2.53173	14.0146	0
30.15	30.15	42.082	8.07604	13.8662	11.3471	1.57212	12.528	0
30.3	30.3	42.839	8.89175	13.5864	10.6062	2.61561	12.7315	0
30.4	30.4	43.343	7.70372	12.1229	10.2571	1.68763	14.347	0
30.5	30.5	43.847	8.4192	14.9412	11.8172	2.3664	10.9304	0
30.6	30.6	44.351	7.72162	14.2809	11.2821	1.87379	10.1044	0
30.7	30.7	44.856	10.5145	17.1416	13.8486	1.80748	11.0738	0
30.8	30.8	45.36	8.36832	13.8382	10.5288	3.77573	13.4329	0.569803
30.9	30.9	45.546	5.45438	10.4871	8.04954	2.77845	13.6948	0
31	31	45.731	7.67481	13.5552	11.2441	1.54074	14.0759	0
31.1	31.1	45.917	7.60579	12.4203	10.0104	3.1884	12.4771	0
31.2	31.2	46.103	7.0089	12.3799	9.96622	2.64974	14.7766	0
31.3	31.3	46.288	9.15394	14.2927	11.4015	3.5692	13.9792	0.552158
31.4	31.4	46.474	7.75797	13.6804	10.8024	2.74825	13.2932	0
31.5	31.5	46.66	8.38657	14.4446	11.5395	3.04736	12.5884	0
31.6	31.6	46.845	7.29517	12.8865	9.80612	3.15772	12.6258	0
31.7	31.7	47.031	10.4907	16.1204	14.209	3.00396	14.455	0
31.8	31.8	47.217	9.14373	14.76	12.1791	2.5809	10.4792	0
31.9	31.9	47.402	9.24753	15.2209	12.7851	2.98414	13.9561	0
32	32	47.588	7.0633	11.8596	9.09788	2.36355	13.4163	0
32.1	32.1	47.774	8.4565	13.8492	11.7322	2.72369	10.1409	0.529256
32.2	32.2	47.959	8.01704	13.928	11.2333	2.99211	11.7433	0
32.3	32.3	48.145
32.4	32.4	48.331	7.74679	13.0239	9.61222	2.26473	11.1307	0
32.5	32.5	48.516
32.6	32.6	48.702	9.88561	15.483	13.2714	2.49401	12.5429	0
32.7	32.7	48.888
32.8	32.8	49.074	10.7795	16.7541	13.2557	2.76924	10.9693	0
33	33	49.445
33.1	33.1	49.631	9.10328	15.0634	12.7815	2.25813	9.3918	0.532246
33.2	33.2	49.816
33.3	33.3	50.002	9.32028	16.2428	14.0613	1.70941	7.71986	0
33.4	33.4	50.188
33.5	33.5	50.373	15.3301	22.7246	18.8887	2.38265	6.62827	0
33.6	33.6	50.559
33.7	33.7	50.745	10.3932	17.356	13.6555	0.563436	7.37585	0.796819
33.75	33.75	50.837
33.9	33.9	51.116	10.6529	17.7098	15.186	0.564333	8.39451	0
34	34	51.302
34.1	34.1	51.487	10.6953	17.903	14.8788	1.54179	7.68077	0
34.2	34.2	51.673
34.3	34.3	51.859	10.1858	17.2396	15.7938	2.679	10.0285	0
34.4	34.4	52.044
34.5	34.5	52.23	11.2213	18.7243	17.1136	2.49925	9.16499	0
34.6	34.6	52.681
34.7	34.7	53.133	11.143	16.0724	12.8306	3.23279	9.32422	0
34.8	34.8	53.584
34.9	34.9	54.035	11.3699	17.5385	13.9947	1.72156	8.49965	0
35	35	54.487
35.1	35.1	54.938	10.7318	17.1057	14.2151	1.41841	5.91912	0
35.2	35.2	55.389
35.3	35.3	55.841	10.6915	17.0499	14.9925	2.05738	10.8985	0
35.4	35.4	56.292
35.5	35.5	56.743	8.00754	14.7019	13.7876	0.555556	9.50647	0
35.6	35.6	57.195
35.7	35.7	57.646	10.4543	16.7505	14.7512	1.9086	7.82884	0.559017
35.8	35.8	58.097	10.0307	15.7468	14.631	1.92226	11.4891	0
35.9	35.9	58.549	5.91488	10.5984	8.89452	1.70389	10.1087	0.567962
36	36	59	6.26573	12.5848	11.0417	1.31706	12.5825	0
36.1	36.1	59.103	7.89441	12.6048	10.0936	2.69197	15.0393	1.13776
36.25	36.25	59.257	5.20168	8.66002	7.26849	2.62862	15.7436	0.57639
36.4	36.4	59.412	4.89789	8.88651	7.1771	1.13961	13.607	0
36.5	36.5	59.515	6.44756	10.5421	8.60562	2.49551	14.4862	0.790569
36.6	36.6	59.618	4.57921	9.47827	7.80326	0.977453	13.9234	0.564333
36.7	36.7	59.721	5.08126	9.45571	7.38235	2.07336	14.6604	0
36.8	36.8	59.824	7.96414	11.6186	8.96712	2.88787	13.8972	0.57073
37	37	60.029	6.89115	10.2601	8.24089	3.2079	10.6254	0
37.2	37.2	60.235	7.54151	10.8321	9.6209	2.57363	13.791	0.564333
37.4	37.4	60.441	3.65601	7.64858	6.68335	1.11456	14.9783	0
37.6	37.6	60.647	5.56151	8.48457	6.1016	1.25789	14.339	0
37.8	37.8	60.853	4.18605	8.94337	7.84902	1.64153	13.0568	0.547176
38	38	61.059	5.93768	9.34337	7.25383	1.52965	15.2973	0
38.2	38.2	61.265
38.42	38.42	61.491	5.92129	8.96118	6.86415	1.28459	13.8722	0
38.6	38.6	61.676
38.8	38.8	61.882	5.79772	9.12159	7.30439	2.34945	13.4929	0
39	39	62.088
39.2	39.2	62.294	6.63663	11.3788	9.13945	2.23934	14.911	0
39.4	39.4	62.5
39.6	39.6	62.706	4.50344	7.78159	6.23625	1.54533	13.8207	0
39.8	39.8	62.912
40	40	63.118	4.26811	7.66667	6.01271	2.20527	13.8773	0
40.2	40.2	63.324
40.4	40.4	63.529	4.65392	9.51943	7.71493	1.9868	14.0715	0.811107
40.6	40.6	63.735
40.8	40.8	63.941	6.44416	10.4668	8.08796	2.19798	16.2566	0.56888
41	41	64.147
41.2	41.2	64.353	4.69111	8.41715	6.54617	1.09599	12.8108	0.547997
41.4	41.4	64.559
41.6	41.6	64.765	6.05012	9.20191	7.10141	2.20301	13.8196	0
41.8	41.8	64.971
42	42	65.176	8.97006	12.8828	10.6978	3.69501	14.2348	0.57073
42.2	42.2	65.382
42.4	42.4	65.588	5.70258	9.0702	6.60531	3.24576	14.7381	0
42.6	42.6	65.794
42.8	42.8	66	6.45805	9.17769	5.98321	3.19448	16.8099	0.543928
43	43	66.15
43.2	43.2	66.3	6.9497	11.1483	8.5673	2.81109	12.964	0
43.4	43.4	66.45
43.6	43.6	66.6	6.87479	11.6905	9.2818	1.89023	12.7533	0.518476
43.8	43.8	66.75	7.05597	13.1863	11.1686	2.01776	9.50823	0.527046
44	44	66.9	11.4007	16.3158	12.8742	2.19937	7.70442	0
44.2	44.2	67.05	9.20399	12.7191	10.6401	2.36627	7.79922	0
44.4	44.4	67.2	12.1377	17.3029	13.5929	2.94087	7.39087	0
44.6	44.6	67.35	11.1056	15.6257	12.1928	1.23091	8.6703	0
44.8	44.8	67.5	12.1179	16.7109	13.2927	3.17957	7.89306	0.5547
45	45	67.65	12.9249	17.8314	14.3116	2.37387	7.46555	0
45.2	45.2	67.8	12.4649	18.1218	14.4164	2.65957	7.16592	0
45.4	45.4	67.95	14.5965	19.609	17.3974	1.2585	7.76111	0
45.6	45.6	68.1	15.8415	20.9747	17.8011	1.89769	8.29807	0
45.8	45.8	68.25	15.4007	21.8931	19.9641	0.905357	5.55376	0
46	46	68.4	15.4264	19.9035	18.0798	2.35339	10.2049	0
46.2	46.2	68.55	13.147	19.1004	17.6347	0.562544	8.26127	0
46.4	46.4	68.7	14.9738	22.163	18.9066	1.9615	5.35804	0
46.6	46.6	68.953	13.5166	18.6684	15.714	2.32649	8.28649	0
46.8	46.8	69.206	11.8059	18.0328	16.5169	2.0397	8.41822	0
47	47	69.459	12.363	18.323	16.205	1.67935	7.95887	0
47.2	47.2	69.712	11.1649	17.0074	15.0332	1.60767	9.20486	0
47.4	47.4	69.965
47.6	47.6	70.218	10.1007	16.8163	15.3874	1.9681	9.3496	0
47.8	47.8	70.471
48	48	70.724	16.2151	23.5293	20.9306	1.39238	8.88096	0
48.2	48.2	70.976
48.4	48.4	71.229	14.9026	22.5005	20.7289	1.31903	6.93952	0.546358
48.6	48.6	71.482
48.8	48.8	71.735	15.1806	22.3652	20.1862	1.31511	4.02418	0
49	49	71.988
49.2	49.2	72.241	15.2971	23.3894	21.3457	1.81208	8.69173	0
49.4	49.4	72.494
49.6	49.6	72.747	12.7567	19.9445	17.7084	1.92387	6.70974	0
49.8	49.8	73
50	50	73.179	8.61464	15.8916	14.5567	1.02463	8.64638	0
50.4	50.4	73.537
50.8	50.8	73.894	10.1375	17.4972	15.9148	2.24309	8.67039	0
51.2	51.2	74.252
51.6	51.6	74.61	12.9042	22.0527	19.8944	0.557278	6.29308	0
52	52	74.968
52.4	52.4	75.326	12.5093	21.1978	20.6602	0.931156	8.17735	0
52.8	52.8	75.683
53.2	53.2	76.041	12.7477	21.3251	19.3934	1.2041	7.40473	0
53.6	53.6	76.399
54	54	76.757	10.7652	19.2912	17.6538	1.13961	9.21116	0
54.4	54.4	77.114
54.8	54.8	77.472	11.4899	19.425	17.9363	1.57895	9.22319	0
55.2	55.2	77.83
55.6	55.6	78.188	12.3467	20.8851	18.4715	1.60904	7.33168	0
56	56	78.546
56.4	56.4	78.903	11.621	19.1151	17.7635	1.42807	6.62274	0
56.8	56.8	79.261
57.2	57.2	79.619	10.0565	18.1077	16.1078	1.83021	7.27433	0
57.4	57.4	79.798
57.6	57.6	79.977	10.2381	18.2521	16.4472	1.37786	7.74203	0
57.8	57.8	80.156
58.2	58.2	80.513	10.7013	19.9352	18.0565	0.542326	5.52693	0
58.6	58.6	80.871
58.8	58.8	81.05	12.194	20.7061	19.191	1.7841	6.64887	0
59	59	81.229
59.2	59.2	81.408	11.997	20.1571	18.3532	1.92983	8.9173	0.565233
59.4	59.4	81.587
59.6	59.6	81.766	12.3448	19.4734	18.5862	1.67968	8.23352	0
59.8	59.8	81.945
59.97	59.97	82.097	9.30956	15.092	13.9002	1.45619	8.25201	0
60.2	60.2	82.302
60.4	60.4	82.481	8.94016	14.9592	14.0294	2.14731	8.33619	0
60.6	60.6	82.66
60.8	60.8	82.839	7.46339	13.4217	11.8848	1.76991	9.01385	0
60.98	60.98	83
61.2	61.2	83.232	9.56646	17.0306	15.4418	2.65937	9.26158	0
61.4	61.4	83.443
61.6	61.6	83.653	8.92558	14.7647	13.5782	2.37304	10.1435	0
61.8	61.8	83.864
62	62	84.075	7.81456	14.768	14.4065	0.855399	12.3158	0
62.2	62.2	84.285
62.4	62.4	84.496	9.31979	14.8618	12.6797	2.34566	9.29834	0
62.6	62.6	84.707
62.8	62.8	84.918	8.72333	13.806	12.8931	1.70556	10.7595	0
63	63	85.128
63.2	63.2	85.339	7.64607	13.4458	11.5138	1.93193	10.4373	0
63.41	63.41	85.56
63.6	63.6	85.761	7.20705	12.54	11.434	1.51083	10.1968	0.553001
63.8	63.8	85.971
64	64	86.182	8.45654	13.4578	10.8369	2.2964	9.97913	0
64.2	64.2	86.393
64.4	64.4	86.603	6.64146	12.3508	10.4854	1.86538	8.48894	0
64.6	64.6	86.814
64.8	64.8	87.025	6.5963	10.6678	9.41949	1.62689	10.0521	0
65	65	87.236	6.93511	13.2111	11.9948	1.08786	8.58478	0
65.2	65.2	87.446	9.08796	16.2856	13.9355	1.689	11.3038	0.536828
65.4	65.4	87.657	7.28982	13.2701	11.0911	2.03298	8.81638	0
65.6	65.6	87.868	5.69326	11.1756	9.72763	1.80953	7.44424	0
65.8	65.8	88.079	10.7101	16.982	14.055	1.25	10.906	0.559017
66	66	88.289	15.0567	22.8504	19.7911	1.64399	6.51368	0
66.2	66.2	88.5	8.97974	14.433	11.5996	2.59204	8.47856	0
66.4	66.4	88.771
66.6	66.6	89.042	18.8327	26.2786	22.6681	3.2836	5.56007	0
66.79	66.79	89.3
67	67	89.585	17.4309	25.6256	21.4045	2.45345	6.62269	0.518476
67.2	67.2	89.856
67.4	67.4	90.127	16.3055	23.8205	21.1008	1.08786	7.38668	0
67.6	67.6	90.398
67.8	67.8	90.669	16.8917	23.7855	19.5816	1.33916	5.33087	0
68	68	90.941
68.2	68.2	91.212	15.9038	24.4218	21.5635	1.14332	5.47452	0
68.4	68.4	91.483
68.6	68.6	91.754	16.0354	24.8801	21.4327	2.29289	5.61621	0
68.8	68.8	92.025
69	69	92.297	16.8441	25.1765	21.5423	0.793052	3.86167	0
69.18	69.18	92.541
69.4	69.4	92.839	17.9068	25.4794	22.2319	2.24662	6.98632	0
69.6	69.6	93.11
69.8	69.8	93.381	18.6621	25.5428	21.8004	2.33625	4.27166	0
70	70	93.653
70.2	70.2	93.924	16.5289	24.3543	21.0038	1.08148	4.97705	0
70.4	70.4	94.195
70.6	70.6	94.466	18.3511	26.07	21.0117	1.58777	3.17554	0
70.8	70.8	94.737
71.07	71.07	95.103	16.7222	24.8855	20.6148	1.36459	3.52855	0
71.2	71.2	95.28
71.4	71.4	95.551	17.4676	24.6448	19.9413	1.52251	6.79386	0
71.6	71.6	95.822
71.8	71.8	96.093	18.3568	25.811	21.5067	3.10319	5.23197	0
72	72	96.364
72.2	72.2	96.636	18.0035	25.8354	21.872	2.56142	3.83523	0
72.4	72.4	96.907
72.6	72.6	97.178	18.4552	26.3601	23.2113	1.72239	4.6476	0
72.8	72.8	97.449
73	73	97.72	18.7371	26.0558	22.3353	2.54452	6.23091	0
73.2	73.2	97.992
73.4	73.4	98.263	19.1814	26.5397	23.8188	2.38606	7.91465	0
73.6	73.6	98.534
73.8	73.8	98.805	18.6711	26.6425	23.6807	2.51213	4.31222	0
74	74	99.076
74.2	74.2	99.347	18.2931	26.0193	22.8751	2.72545	6.22395	0
74.4	74.4	99.619
74.6	74.6	99.89	17.4743	26.0974	22.5829	2.74621	4.18399	0
74.8	74.8	100.161
75	75	100.432	20.1155	27.5231	23.5881	2.97206	4.56997	0
75.2	75.2	100.703
75.4	75.4	100.975	18.0623	24.9551	22.4632	2.6688	5.3241	0
75.6	75.6	101.246
75.8	75.8	101.517	19.3547	27.5397	24.7438	3.19098	6.82457	0
76	76	101.788
76.2	76.2	102.059	18.0501	26.3268	23.1079	1.70793	5.81929	0
76.4	76.4	102.331
76.6	76.6	102.602	18.4465	25.7355	22.8814	1.22958	4.29236	0
76.8	76.8	102.873
77.02	77.02	103.171	17.633	25.8447	22.9866	2.3235	6.13566	0
77.2	77.2	103.415
77.4	77.4	103.686	17.8476	26.7649	23.6692	1.48166	4.24556	0
77.5	77.5	103.822
77.6	77.6	103.958	17.3441	26.2307	23.9794	1.55963	5.10131	0
77.7	77.7	104.093	16.9155	25.7267	23.904	1.43407	8.6423	0
77.8	77.8	104.229	17.0218	25.5085	22.0616	2.51743	6.19824	0
77.9	77.9	104.364
78	78	104.5	9.51005	17.1698	16.093	2.12048	8.21365	0
78.1	78.1	104.635
78.2	78.2	104.771	8.93386	15.6726	14.2426	1.80555	10.2493	0
78.3	78.3	104.906
78.4	78.4	105.042	10.2919	17.8254	16.8675	1.09599	10.3277	0
78.6	78.6	105.313
78.8	78.8	105.583	7.67168	14.343	13.1045	2.0217	10.2217	0
79	79	105.854
79.2	79.2	106.125	6.90448	13.3449	11.1737	1.49491	9.15063	0
79.4	79.4	106.396
79.5	79.5	106.531	6.89649	13.5972	11.8405	1.91273	9.61156	0
79.6	79.6	106.667
79.7	79.7	106.802	9.15427	15.5628	13.5365	2.07134	10.1588	0
79.8	79.8	106.938
79.9	79.9	107.073	8.91633	14.5875	13.5477	2.31318	8.55613	0
80	80	107.208
80.2	80.2	107.479	8.46127	14.2517	12.4001	1.30929	10.9116	0
80.4	80.4	107.75
80.6	80.6	108.021	7.73467	14.1959	12.9536	0.785674	9.56444	0
80.8	80.8	108.292
81	81	108.563	9.33747	16.3684	14.7351	2.26455	10.3351	0
81.2	81.2	108.833
81.3	81.3	108.969	7.94445	14.893	12.6673	1.11283	8.29953	0
81.4	81.4	109.104
81.5	81.5	109.24	7.21191	13.2421	10.3931	1.94543	10.3048	0
81.59	81.59	109.361
81.8	81.8	109.646	8.30489	13.7821	11.2159	2.5662	10.3033	0
82.02	82.02	109.944
82.2	82.2	110.188	5.47469	11.8526	9.91251	1.50329	8.49757	0
82.4	82.4	110.458	6.38244	12.3802	10.0823	1.56952	7.9771	0
82.6	82.6	110.729	6.96671	14.1479	11.6876	2.05818	9.65984	0
82.8	82.8	111	6.77662	11.6783	9.4968	1.84392	10.4081	0
83	83	111.232	6.59523	11.5199	9.99493	2.20667	13.3492	0
83.2	83.2	111.464	8.08109	14.1004	11.7049	2.00927	8.52174	0
83.4	83.4	111.696	7.46605	14.2392	10.999	1.7063	6.53977	0
83.6	83.6	111.928	9.08298	17.0958	14.6085	2.0601	4.8343	0
83.8	83.8	112.16	8.95003	17.6363	16.0763	1.89448	6.25308	0
84.02	84.02	112.415	8.48486	16.0383	13.6165	2.84074	9.88476	0
84.2	84.2	112.624	8.78478	16.2063	14.1853	1.7038	10.5196	0
84.27	84.27	112.705	10.0172	16.6901	13.9554	2.88109	8.61571	0
84.36	84.36	112.809	9.22025	15.7699	13.2907	2.13636	8.62679	0
84.6	84.6	113.088
84.8	84.8	113.32	10.6329	18.413	16.2162	2.28559	10.0311	0
85	85	113.552
85.2	85.2	113.784	11.7697	18.2944	14.6726	2.93561	9.10393	0
85.4	85.4	114.016
85.6	85.6	114.248	11.6071	18.8658	15.2018	3.27875	7.68258	0
85.8	85.8	114.48
86	86	114.712	13.041	20.9546	16.6289	2.42251	5.22636	0
86.2	86.2	114.943
86.4	86.4	115.175	14.116	21.5018	17.7805	2.48734	5.09705	0
86.6	86.6	115.407
86.8	86.8	115.639	14.6576	22.0484	18.1568	3.25326	3.84767	0
87.01	87.01	115.883
87.2	87.2	116.103	13.3293	21.0505	17.0442	2.82166	4.64788	0
87.4	87.4	116.335
87.6	87.6	116.567	12.7356	20.52	16.6297	2.5118	5.42383	0
87.8	87.8	116.799
87.98	87.98	117.008	13.8202	21.8705	17.2861	3.02261	4.07621	0
88.2	88.2	117.263
88.4	88.4	117.495	12.2302	21.2493	18.7001	2.12653	7.09376	0
88.6	88.6	117.727
88.7	88.7	117.843	13.331	21.5149	18.0057	3.48454	7.12969	0
88.8	88.8	117.959
88.9	88.9	118.075	14.5101	23.4973	19.9908	1.98727	5.45738	0
89.02	89.02	118.214
89.1	89.1	118.307	14.2094	22.6378	18.8166	1.90284	4.61607	0
89.2	89.2	118.423
89.4	89.4	118.655	13.1855	22.8247	19.6868	1.79505	4.82599	0
89.6	89.6	118.887
89.8	89.8	119.119	15.171	23.0761	19.1682	2.99985	2.65796	0
90.02	90.02	119.374
90.18	90.18	119.56	15.1209	24.6224	20.3859	3.27419	3.55616	0
90.4	90.4	119.815
90.6	90.6	120.047	13.9443	22.8715	19.4629	2.98659	4.51223	0
90.8	90.8	120.279
91	91	120.511	14.1128	22.4337	21.5494	1.58777	6.36594	0
91.2	91.2	120.743
91.38	91.38	120.952	14.2903	24.6637	22.2597	3.04399	4.22081	0
91.6	91.6	121.207
91.8	91.8	121.439	15.0789	24.4909	22.8016	2.51523	4.66187	0
92.02	92.02	121.694
92.2	92.2	121.903	15.0915	25.3919	23.7503	2.31787	3.91026	0
92.4	92.4	122.135	14.0716	22.27	20.826	2.37795	3.31449	0
92.6	92.6	122.367	11.7561	20.7895	21.1587	1.51248	6.32256	0
92.78	92.78	122.575	12.3649	21.7428	21.4101	2.17007	5.037	0
93.02	93.02	122.854	11.193	20.7311	20.8846	1.51083	6.34498	0
93.19	93.19	123.051	10.7259	20.156	19.9878	0.78811	5.89405	0
93.4	93.4	123.294	13.5333	23.1007	22.1451	1.87906	6.20393	0
93.6	93.6	123.526	13.4067	21.9179	20.6985	2.20873	4.16051	0
93.8	93.8	123.758	13.0657	23.0657	22.5457	1.12687	6.38772	0
94	94	123.99	13.9868	24.4675	23.76	2.3595	6.35352	0
94.2	94.2	124.222	12.997	22.6986	22.1795	0.974355	6.28109	0
94.4	94.4	124.454	11.9707	22.0009	22.0009	1.93292	4.6456	0
94.6	94.6	124.686	13.2297	23.1539	22.7007	2.16095	7.18112	0
94.8	94.8	124.918	14.2862	23.2951	22.9903	1.3734	5.0507	0
95	95	125.15	12.5505	22.4257	22.6792	0.764719	6.06602	0
95.2	95.2	125.382	13.372	23.2879	23.2219	1.5162	5.80465	0
95.3	95.3	125.498	12.7988	23.1918	24.0513	3.08797	5.60214	0
95.39	95.39	125.603	11.596	21.0483	20.8648	1.60603	4.83224	0
95.5	95.5	125.73	8.53732	19.7321	20.1109	0.923186	5.79532	0
95.6	95.6	125.846	13.8826	22.9823	23.5874	2.0607	6.57425	0
95.69	95.69	125.95	12.6308	22.8994	23.2897	2.10948	8.28921	0
95.8	95.8	126.078	11.099	22.0215	21.6721	2.12368	6.95684	0
95.9	95.9	126.194	9.20063	19.51	20.0809	1.64499	6.97369	0
96	96	126.31	12.915	23.0131	23.2568	2.83026	7.03524	0
96.1	96.1	126.426	11.4509	19.9106	19.1895	1.56599	6.28179	0
96.2	96.2	126.542	12.1388	23.2173	22.4482	1.25679	5.71261	0
96.25	96.25	126.6	4.19454	14.2342	14.7666	1.1894	8.71736	0
96.3	96.3	126.656	8.57483	17.3198	15.8376	2.07055	8.51872	0
96.4	96.4	126.767	6.08015	14.5315	13.6625	0.547997	8.39012	0
96.6	96.6	126.99	9.54488	17.3746	15.2685	2.51924	8.46099	0
96.8	96.8	127.212	8.41809	14.4935	12.9103	2.9991	10.2487	0
96.97	96.97	127.401	7.10467	13.2961	12.7187	1.73205	9.7869	0
97.2	97.2	127.657	6.52492	12.0162	11.0554	1.51547	8.03994	0
97.4	97.4	127.88	7.3189	13.4541	11.739	1.93465	10.7881	0
97.6	97.6	128.103	6.27997	13.2318	11.9739	1.25789	12.4246	0
97.8	97.8	128.325	4.99011	10.7636	9.87369	1.9714	15.5423	0
98	98	128.548	6.101	12.321	11.3787	1.51495	10.3124	0
98.2	98.2	128.77	4.13209	9.67909	9.67909	1.39618	13.327	0
98.4	98.4	128.993	8.59218	13.9374	10.8182	2.75125	11.212	0
98.6	98.6	129.216	8.75913	13.4109	9.7907	1.97517	11.0838	0
98.8	98.8	129.438	7.73705	12.8719	9.02689	2.76624	8.65943	0
99	99	129.661	8.66805	12.3627	9.38898	1.59364	13.1755	0
99.2	99.2	129.883	5.57524	9.37301	7.52098	1.83206	14.8764	0
99.5	99.5	130.217	8.36228	11.7176	9.04429	2.54009	12.5031	0
99.6	99.6	130.329	6.69864	10.332	7.42252	1.28459	12.637	0
99.8	99.8	130.551	4.18486	7.42396	5.8596	1.80155	13.3932	0
100	100	130.774	5.97868	9.56043	6.94482	2.19575	12.4082	0
100.2	100.2	130.997	7.75718	11.2024	8.06138	3.66652	14.6772	0
100.4	100.4	131.219	5.9005	8.95907	6.54941	2.1744	13.6817	0
100.6	100.6	131.442	5.01857	8.49735	6.43737	2.05997	13.2001	0
100.8	100.8	131.664	5.95229	10.0187	7.84846	2.63651	12.2485	0
101	101	131.887	5.43641	8.68084	6.25129	2.09358	12.9397	0
101.2	101.2	132.11	7.2299	10.8761	9.57822	2.6226	12.7186	0
101.4	101.4	132.332	8.28942	12.4854	10.4732	3.04399	12.0168	0
101.6	101.6	132.555	7.7261	12.1269	9.80016	2.15785	14.2614	0
101.8	101.8	132.777	5.10471	7.2129	4.92537	2.05415	12.538	0
102	102	133	5.4451	7.80598	5.83081	2.78495	14.0495	0

## Sheet: Tenaghi Philippon
Depth (m)	Age Quest (ka BP)	boreal forest	temperate forest	warm-temperate forest	tundra	grassland and dry shrubland	desert
0.6	1.5	16.9229	24.6958	20.5476	8.87112	17.79	0
0.8	2	15.0396	20.6719	16.674	6.93043	10.6276	0.858917
1	2.5	10.1776	17.9986	12.923	7.57148	10.3267	0
1.2	3	14.6913	21.8537	16.901	9.5499	10.3602	0
1.4	3.5	11.0429	18.7829	15.2555	8.06135	8.58539	0
1.6	4	14.3735	21.7215	18.5856	6.30364	9.53032	0
1.8	4.5	9.2523	19.1739	17.6265	6.84247	9.04012	0.631744
2	5	12.9106	22.7029	18.9826	5.92597	6.21152	0
2.2	5.5	6.97018	17.0266	12.1415	2.31946	6.74522	0.73721
2.4	6	8.89142	18.5425	16.1503	5.52507	11.7793	0.739221
2.6	6.5	10.4267	17.6477	15.3387	4.61801	8.92523	0
2.8	7	11.316	19.2486	16.9906	4.42437	8.46103	0
3	7.5	7.44199	15.4949	14.8329	4.55305	9.61711	0
3.2	8	10.0934	18.0353	17.3825	5.2995	7.46839	0
3.4	8.5	9.12352	18.0072	17.3345	5.54018	6.84885	0
3.6	9	7.19829	14.3564	14.3564	4.69978	9.44287	0
3.8	9.5	9.25627	15.4964	15.4964	6.9724	16.819	0
4	10	7.78751	13.8279	12.8069	8.3193	16.4561	0
4.2	10.5	10.6726	15.9678	14.5929	9.91805	18.3561	0.561286
4.4	11	6.76557	12.2058	10.0645	8.09382	18.8099	0.645637
4.6	11.5	5.97407	8.98895	8.98895	9.95797	17.9459	0
4.8	12	9.18247	16.0456	14.9017	8.70047	16.1798	0
5	12.5	8.65081	14.9354	13.7184	9.49268	16.6318	0
5.2	13	7.90139	14.1034	13.1348	8.99614	13.2563	0
5.4	13.5	5.04212	9.9824	7.86204	8.6311	18.9585	0
5.6	14	7.56214	14.8552	12.7389	6.84722	11.5557	1.05819
5.8	15.2386	0.88941	2.87819	1.98878	9.08936	15.183	1.0893
6	16.0493	2.97745	4.53291	3.70148	9.34639	18.8696	0.587907
6.2	16.86	4.277	4.277	3.24038	8.36591	17.8055	0.846399
6.4	17.6708	2.69026	2.69026	1.82836	8.7082	18.2025	0
6.6	18.4815	1.96503	2.9822	1.73643	8.19393	18.6418	0.719251
6.8	19.2923	0.824983	0.824983	0	6.68759	20.0066	0
7	20.103	3.51767	3.51767	2.2903	9.17732	17.2348	0
7.2	20.9137	1.79567	1.79567	0.897836	8.35582	18.0114	0
7.4	21.7245	3.37271	4.21687	3.02305	8.29842	16.9565	0
7.6	22.5352	5.03859	5.03859	3.81602	10.1687	17.7112	0
7.8	23.346	3.12996	4.16532	2.82867	8.34478	16.6755	1.03537
8	24.1567	2.50277	2.50277	1.25139	8.10265	17.2976	0.625693
8.2	24.9674	2.15736	2.70104	1.48534	7.73978	17.9993	0
8.4	25.7782	2.51341	2.51341	1.47232	5.69698	14.1455	0.736161
8.6	26.5889	2.09617	2.09617	1.22791	8.8217	16.0376	0
8.8	27.3997	4.63895	4.63895	3.17579	7.69572	19.7066	0.597332
9	28.2104	2.62633	2.62633	1.75089	6.68247	18.5186	0
9.2	29.0211	3.89895	3.89895	2.35395	8.31413	18.2319	0
9.4	29.8319	1.71249	2.33931	1.71249	6.83198	19.5954	0.626816
9.6	30.6426	3.84516	3.84516	3.01749	6.89001	20.9205	0.827673
9.8	31.4534	3.37534	4.45514	3.2083	9.63785	20.2031	0.623422
10	32.2641	2.88566	3.96045	3.08289	8.29571	20.5815	0
10.2	33.0748	3.84509	4.46712	3.22306	8.08989	19.1726	0.622028
10.4	33.8856	3.30615	3.30615	2.24222	7.9658	18.9646	0
10.6	34.6963	3.02226	3.02226	3.02226	8.37056	20.3921	0
10.8	35.5071	4.16216	4.79319	3.24748	8.92116	19.1908	0
11	36.3178	2.09782	2.09782	1.48339	7.24912	21.4718	0
11.2	37.1285	0.848708	2.19063	2.19063	6.76309	18.5307	0
11.4	37.9393	2.98242	4.51571	3.69613	9.03591	19.802	0
11.6	38.75	1.66707	2.27726	2.27726	6.88053	20.1755	0.61019
11.8	39.5608	2.73229	3.93054	2.89282	7.63159	19.1314	0.599123
12	40.3715	1.25795	2.14745	1.51847	7.60462	19.3352	0
12.2	41.1822	2.27627	2.27627	1.66635	6.84308	21.3926	0
12.4	41.993	2.87224	4.20239	3.36113	7.59797	20.0075	0
12.6	42.8037	3.60557	3.60557	2.59785	11.9155	14.9055	0
12.8	43.6145	3.47902	4.45384	2.35341	7.78382	19.1705	0
13	44.4252	5.67558	6.57963	5.03631	11.36	14.5443	0
13.2	45.2359	2.66894	2.66894	1.55402	9.35843	18.0111	0.643696
13.4	46.0467	0.998989	1.99798	1.99798	5.61312	21.61	0
13.6	46.8574	1.6132	2.4198	2.4198	6.08968	20.5014	0
13.8	47.6682	2.88954	3.76829	2.37887	10.2154	17.1189	0.87875
14	48.4789	4.09886	6.32855	4.70049	8.61685	19.0592	0
14.2	49.2896	5.54244	8.0363	6.00076	7.05524	20.4352	0.531691
14.4	50.1004	1.68109	4.14238	3.07661	7.3277	18.5866	0.615323
14.6	50.9111	1.22424	1.22424	1.22424	4.94771	18.6366	0
14.8	51.7219	4.19597	7.56892	6.73856	7.94107	17.2128	0
15	52.5326	4.39962	6.36771	4.93511	8.06019	17.9423	0
15.2	53.3433	4.37413	7.22657	6.29289	9.23391	16.4508	0.539059
15.4	54.1541	1.53175	2.95048	2.95048	5.9048	19.1364	0.634473
15.6	54.9648	3.61392	5.60808	4.97747	8.43041	20.1717	0.63061
15.8	55.7756	3.4356	5.10283	3.67976	8.59177	16.6432	0
16	56.5863	1.44363	3.02572	2.18006	6.02426	18.4814	0
16.2	57.397	3.43851	5.42807	4.8282	9.04794	16.9327	0
16.4	58.2078	5.13708	6.7346	5.24026	10.6093	16.2802	0
16.6	59.0185	5.35406	6.52482	5.51091	7.94963	19.0333	0
16.8	59.8293	0.678596	1.85396	1.17536	7.18159	17.0216	0.678596
17	60.64	3.58415	5.22924	4.06599	7.3539	18.6362	0.581628
17.2	61.4507	1.81793	1.81793	1.21195	5.49152	21.355	0.605977
17.4	62.2615	1.61223	2.20235	1.61223	4.0813	19.4723	0
17.6	63.0722	0.883684	0.883684	0	6.54202	19.6964	0
17.8	63.883	2.61759	3.57569	2.61759	6.64108	17.2126	0
18	64.6937	3.84371	3.84371	2.42385	7.47717	19.9645	0
18.2	65.5044	2.83977	2.83977	1.35491	6.83795	20.1818	0
18.4	66.3152	2.58356	3.44608	2.08231	7.61333	18.6061	0
18.6	67.1259	3.70719	4.32601	3.45086	6.58346	19.4136	0
18.8	67.9367	6.72643	7.21579	5.92106	6.67774	19.9231	0
19	68.7474	3.25797	3.25797	2.29801	7.06779	20.1281	0
19.2	69.5581	3.4085	4.2119	3.07573	6.89735	19.1827	0
19.4	70.3689	0.5284	1.0568	0.5284	4.48259	17.3897	0.5284
19.6	71.1796	2.1264	3.68303	3.68303	6.80712	19.2313	0
19.8	71.9904	3.78496	5.36115	3.88676	5.92248	16.7225	0
20	72.8011	1.46914	2.32974	1.7212	6.21897	18.3165	0
20.2	73.6118	1.42642	2.6081	1.77253	5.16323	17.2622	0
20.4	74.4226	4.60173	6.42091	3.8482	10.2578	18.7518	0
20.6	75.2333	5.09259	6.98611	6.4395	8.86394	15.3374	0
20.8	76.0441	4.4623	5.70799	3.16738	7.09256	18.2452	0
21	76.8548	4.59587	6.38036	3.96665	6.46149	13.5078	0.728516
21.2	77.6655	2.01785	7.92798	7.09216	2.63835	9.89715	0
21.4	78.4763	4.44508	11.2334	9.8953	3.91925	13.4677	0
21.6	79.287	4.5153	10.1856	10.1856	7.72653	13.5314	0
21.8	80.0978	5.12752	12.4626	12.4626	4.4963	10.3821	0
22	80.9085	5.16153	10.8012	9.60097	8.78059	14.8107	0
22.2	81.7192	5.93153	13.0319	11.0117	5.5554	11.6535	0
22.4	82.53	2.6011	8.63917	6.62733	4.06526	10.883	0
22.6	83.3407	2.76032	3.80868	2.76032	8.67146	19.1792	0.605269
22.8	84.1515	3.88544	7.00775	5.91739	6.50232	18.8412	0
23	84.9622	1.09374	3.06551	2.51864	4.49041	18.6399	0
23.2	85.7729	0.569802	1.55673	0.986925	3.79309	19.5269	0.569802
23.4	86.5837	2.28249	3.83952	3.061	4.18945	18.7262	0
23.6	87.3944	2.76978	2.76978	2.76978	5.1184	16.9043	0
23.8	88.2052	1.18099	1.18099	0.590497	5.47988	20.0901	0.590497
24	89.0159	0.52979	1.44741	0.917624	3.47954	18.8945	0
24.2	89.8266	6.54505	13.225	10.7957	6.99988	12.8173	0
24.4	90.6374	8.36192	14.4101	11.946	6.49512	12.1807	0.529884
24.6	91.4481	6.47485	12.9497	12.2487	6.8603	10.1823	0
24.8	92.2589	11.4762	17.0943	11.9841	6.82809	12.1669	0
25	93.0696	8.7566	15.4939	12.821	7.85617	11.0504	0
25.2	93.8803	13.6021	21.147	17.5187	7.02558	9.60164	0.632991
25.4	94.6911	10.5722	17.9561	15.5422	7.67787	9.62325	0.608329
25.6	95.5018	3.50651	9.37568	8.72803	7.20448	13.4475	0
25.8	96.3126	10.8406	17.8675	15.8147	6.88694	10.4476	0
26	97.1233	9.25835	17.1664	15.4364	5.55138	10.4762	0
26.2	97.934	6.69879	14.0927	12.4542	4.58533	12.429	0
26.4	98.7448	7.77519	15.4654	13.8756	6.02799	10.7289	0
26.6	99.5555	6.10135	12.2326	12.2326	4.8055	14.0691	0
26.8	100.366	7.87638	13.9631	12.9757	6.7811	13.7476	0
26.9	100.772	6.10131	9.67259	8.57911	6.85129	13.9854	0
27.2	101.988	5.51784	8.74341	6.57963	6.80308	17.634	0
27.4	102.798	3.06021	5.60505	4.0995	7.78705	18.2348	0
27.6	103.609	4.20823	10.8231	10.2582	6.42727	11.6023	0
27.8	104.42	5.99339	12.1866	10.7532	6.44389	13.0623	0
27.9	104.825
28	105.231	3.3211	6.26234	4.70599	10.4637	15.1325	0
28.2	106.041	3.3211	6.26234	4.70599	10.4637	15.1325	0
28.4	106.852	3.03054	4.2689	2.47673	6.65792	14.9897	0.553813
28.6	107.663	2.10458	6.489	6.489	5.23084	18.2394	0
28.8	108.474	3.51396	5.22993	3.62478	6.89186	16.9431	0
29	109.284	6.35392	11.491	9.4846	7.07672	12.675	0
29.2	110.095	4.59581	9.63934	9.04495	6.32024	11.1109	0
29.4	110.906	2.50512	8.32049	6.65041	6.84411	11.4245	0
29.6	111.717	4.5579	10.7189	10.0669	6.4592	8.50011	0
29.8	112.527	4.4238	9.77788	8.56021	5.73283	6.8265	0
30	113.338	8.89667	14.0176	10.3966	8.24252	9.26385	0
30.2	114.149	8.41882	14.6206	12.6594	7.32543	6.74518	0
30.4	114.96	8.95737	15.9005	11.4822	7.77899	5.70099	0
30.6	115.77	8.54721	16.5151	16.5151	5.83482	11.6778	0
30.8	116.581	8.04975	15.3978	13.0401	5.94154	7.33441	0
31	117.392	9.55351	17.4369	14.8317	5.92995	10.469	0
31.2	118.203	8.42798	16.376	15.5403	4.89614	7.51605	0
31.35	118.811	7.93752	15.0607	11.8454	5.66535	12.2593	0
31.6	119.824	8.74876	17.0581	14.6516	4.65243	6.68218	0
31.8	120.635	9.50962	18.1504	15.2914	4.30331	5.14933	0
32	121.446	7.56975	15.0989	12.9305	6.5152	12.4165	0
32.2	122.256	6.9202	14.6865	13.0296	5.47624	4.64095	0
32.4	123.067	8.48727	16.7744	13.8787	5.94926	4.41909	0
32.6	123.878	9.43277	17.2535	14.1383	4.80146	9.25077	0
32.8	124.688	3.16914	12.3186	10.9792	3.14125	7.25752	0
33	125.499	7.21599	14.4222	12.0874	6.34246	8.98987	0
33.2	126.31	6.30233	14.2412	11.5432	4.36374	6.75053	0
33.4	127.121	6.56946	14.0592	12.4317	4.52895	14.0092	0
33.6	127.931	7.27821	15.0849	15.0849	4.33984	13.1423	0
33.8	128.742	4.2653	12.5806	11.6612	4.21346	12.0844	0
34	129.553	4.39185	10.3185	9.88035	8.11108	17.6228	0.438108
34.2	130.364	7.4099	14.6146	12.9216	7.22761	15.662	0
34.4	131.174	1.69893	4.58655	4.02024	4.88909	14.8446	0.56631
34.5	131.58	2.78989	4.48678	3.63833	5.30733	15.1652	0.848443
34.7	132.39	2.90302	4.63821	3.41125	4.2324	16.7438	0
34.9	133.201	2.72192	3.59396	2.97734	5.64754	17.878	0
