# Supplementary material for: Terrestrial biosphere changes over the last 120 kyr
Source: Copernicus journal article supplement (doi:10.5194/cp-12-51-2016), 2016-01-18
Supplement: Supplementary file 1 [file cp-12-51-2016-supplement.zip › supplement/North_America/BiomizationThompsonandAnderson2000.xls]

## Sheet: Bear Lake
		arctic/alpine dwarf shrub	boreal evergreen conifer	boreal summergreen	cool temperate conifer	desert forb	eurythermic conifer	grass	heath	sedge	steppe forb	temperate summergreen	cool-temperate summergreen	intermediate-temperate summergreen	warm-temperate summergreen	warm-temperate conifer	warm-temperate broadleaved evergreen	cool-temperate broadleaved evergreen	warm-temperate sclerophyll shrub			Biomes
		aa	bec	bs	ctc	df	ec	g	h	s	sf	ts	ts1	ts2	ts3	wtc	wte	wte1	wte2			cold deciduous forest	taiga	cold mixed forest	cool conifer forest	temperate deciduous forest	cool mixed forest	broadleaved evergreen/warm mixed forest	xerophytic woods/scrub	steppe	desert	tundra	open conifer woodland		SQRT	boreal forest	temperate forest	warm-temperate forest	grassland and dry shrubland	desert	tundra	savanna and dry woodland		sqrt	boreal forest	temperate forest	warm-temperate forest	grassland and dry shrubland	desert
Abies	Abies		1		1																	0	1	1	2	0	2	0	0	0	0	0	0			1	1	0	0	0	0	0		0	0	0	0	0	0
Acer	Acer											1										0	0	0	0	1	1	1	0	0	0	0	0			0	1	1	0	0	0	0		0	0	0	0	0	0
Alnus	Alnus undiff.	1		1		1																1	1	1	1	1	1	0	0	0	1	1	0			1	1	0	0	1	1	0		0	0	0	0	0	0
Ambrosia	Ambrosia-type					1					1											0	0	0	0	0	0	0	0	1	1	0	1			0	0	0	1	1	0	1		0	0	0	0	0	0
Apiaceae	Umbelliferae/Apiaceae																																			0	0	0	0	0	0	0		0	0	0	0	0	0
Artemisia	Artemisia										1											0	0	0	0	0	0	0	0	1	0	0	1			0	0	0	1	0	0	1		0	0	0	0	0	0
Asteraceae	Tubuliflorae/Other Asteraceae					1					1											0	0	0	0	0	0	0	0	1	1	0	1			0	0	0	1	1	0	1		0	0	0	0	0	0
Betula	Betula undiff.	1		1									1									1	1	2	2	2	2	0	0	0	0	1	0			1	1	0	0	0	1	0		0	0	0	0	0	0
Botryococcus																																				0	0	0	0	0	0	0		0	0	0	0	0	0
Campanulaceae	Campanulaceae																																			0	0	0	0	0	0	0		0	0	0	0	0	0
Caryophyllaceae	Caryophyllaceae	1				1					1											0	0	0	0	0	0	0	0	1	1	1	1			0	0	0	1	1	1	1		0	0	0	0	0	0
Ceanothus	Ceanothus											1							1			0	0	0	0	1	1	1	1	0	0	0	0			0	1	1	1	0	0	0		0	0	0	0	0	0
Celtis	Celtis													1	1							0	0	0	0	1	0	1	0	0	0	0	0			0	1	1	0	0	0	0		0	0	0	0	0	0
Cercocarpus-type	Cercocarpus-type										1											0	0	0	0	0	0	0	0	1	0	0	1			0	0	0	1	0	0	1		0	0	0	0	0	0
cf. Schrophulariaceae	Scrophulariaceae																																			0	0	0	0	0	0	0		0	0	0	0	0	0
Cheno-Am	Chenopodiaceae/Amaranthus					1					1											0	0	0	0	0	0	0	0	1	1	0	1			0	0	0	1	1	0	1		0	0	0	0	0	0
Cornus	Cornus			1								1	1									1	1	2	2	3	3	1	0	0	0	0	0			1	1	1	0	0	0	0		0	0	0	0	0	0
Cruciferae	Cruciferae																																			0	0	0	0	0	0	0		0	0	0	0	0	0
Cyperaceae	Cyperaceae									1												0	0	0	0	0	0	0	0	1	0	1	0			0	0	0	1	0	1	0		0	0	0	0	0	0
Drosera	Drosera																																			0	0	0	0	0	0	0		0	0	0	0	0	0
Ephedra	Ephedra					1					1											0	0	0	0	0	0	0	0	1	1	0	1			0	0	0	1	1	0	1		0	0	0	0	0	0
Ericaceae	Ericaceae								1													1	1	1	1	1	1	1	0	0	0	1	0			1	1	1	0	0	1	0		0	0	0	0	0	0
Eriogonum	Eriogonum					1					1											0	0	0	0	0	0	0	0	1	1	0	1			0	0	0	1	1	0	1		0	0	0	0	0	0
Fraxinus	Fraxinus											1										0	0	0	0	1	1	1	0	0	0	0	0			0	1	1	0	0	0	0		0	0	0	0	0	0
Galium type	Galium-type																																			0	0	0	0	0	0	0		0	0	0	0	0	0
Gentianaceae	Gentianaceae																																			0	0	0	0	0	0	0		0	0	0	0	0	0
Geraniaceae	Geraniaceae																																			0	0	0	0	0	0	0		0	0	0	0	0	0
Indeterminable																																				0	0	0	0	0	0	0		0	0	0	0	0	0
Juglans	Juglans													1								0	0	0	0	1	0	0	0	0	0	0	0			0	1	0	0	0	0	0		0	0	0	0	0	0
Juniperus	Juniperus sp.																																			0	0	0	0	0	0	0		0	0	0	0	0	0
Lactuceae	Lactuceae																																			0	0	0	0	0	0	0		0	0	0	0	0	0
Lamiaceae	Lamiaceae																																			0	0	0	0	0	0	0		0	0	0	0	0	0
Leguminosae other	Fabaceae																																			0	0	0	0	0	0	0		0	0	0	0	0	0
Liliaceae	Liliaceae																																			0	0	0	0	0	0	0		0	0	0	0	0	0
Lonicera																																				0	0	0	0	0	0	0		0	0	0	0	0	0
Myriophyllum																																				0	0	0	0	0	0	0		0	0	0	0	0	0
Onagraceae	Onagraceae																																			0	0	0	0	0	0	0		0	0	0	0	0	0
Pediastrum																																				0	0	0	0	0	0	0		0	0	0	0	0	0
Picea	Picea		1		1																	0	1	1	2	0	2	0	0	0	0	0	0			1	1	0	0	0	0	0		0	0	0	0	0	0
Pinus	Pinus						1															1	1	1	1	1	1	1	1	0	0	0	1			1	1	1	1	0	0	1		0	0	0	0	0	0
Plantago	Platanus													1								0	0	0	0	1	0	0	0	0	0	0	0			0	1	0	0	0	0	0		0	0	0	0	0	0
Plumbaginaceae	Plumbaginaceae																																			0	0	0	0	0	0	0		0	0	0	0	0	0
Poaceae	Poaceae							1														0	0	0	0	0	0	0	0	1	1	1	0			0	0	0	1	1	1	0		0	0	0	0	0	0
Polemoniaceae																																				0	0	0	0	0	0	0		0	0	0	0	0	0
Polygonum	Polygonum sp.																																			0	0	0	0	0	0	0		0	0	0	0	0	0
Populus	Populus			1								1										1	1	1	1	2	2	1	0	0	0	0	0			1	1	1	0	0	0	0		0	0	0	0	0	0
Potamogeton																																				0	0	0	0	0	0	0		0	0	0	0	0	0
Pseudotsuga	Pseudotsuga				1																	0	0	1	1	0	1	0	0	0	0	0	0			1	1	0	0	0	0	0		0	0	0	0	0	0
Quercus	Quercus											1					1		1			0	0	0	0	1	1	2	2	0	0	0	0			0	1	1	1	0	0	0		0	0	0	0	0	0
Ranunculaceae	Ranunculaceae	1				1					1											0	0	0	0	0	0	0	0	1	1	1	1			0	0	0	1	1	1	1		0	0	0	0	0	0
Rosaceae	Rosaceae																																			0	0	0	0	0	0	0		0	0	0	0	0	0
Rumex	Polygonaceae																																			0	0	0	0	0	0	0		0	0	0	0	0	0
Salix	Salix	1		1								1										1	1	1	1	2	2	1	0	0	0	1	0			1	1	1	0	0	1	0		0	0	0	0	0	0
Sarcobatus	Sarcobatus										1											0	0	0	0	0	0	0	0	1	0	0	1			0	0	0	1	0	0	1		0	0	0	0	0	0
Shepherdia																																				0	0	0	0	0	0	0		0	0	0	0	0	0
Sphaeralcea	Sphaeralcea-type					1					1											0	0	0	0	0	0	0	0	1	1	0	1			0	0	0	1	1	0	1		0	0	0	0	0	0
Thalictrum	Thalictrum	1																				0	0	0	0	0	0	0	0	0	0	1	0			0	0	0	0	0	1	0		0	0	0	0	0	0
Typha																																				0	0	0	0	0	0	0		0	0	0	0	0	0
Typha tetrad																																				0	0	0	0	0	0	0		0	0	0	0	0	0
Ulmus	Ulmus											1										0	0	0	0	1	1	1	0	0	0	0	0			0	1	1	0	0	0	0		0	0	0	0	0	0
Urticaceae																																				0	0	0	0	0	0	0		0	0	0	0	0	0
																																													0	0	0	0	0
[truncated: 2 more columns]

## Sheet: Carp Lake
		arctic/alpine dwarf shrub	boreal evergreen conifer	boreal summergreen	cool temperate conifer	desert forb	eurythermic conifer	grass	heath	sedge	steppe forb	temperate summergreen	cool-temperate summergreen	intermediate-temperate summergreen	warm-temperate summergreen	warm-temperate conifer	warm-temperate broadleaved evergreen	cool-temperate broadleaved evergreen	warm-temperate sclerophyll shrub			Biomes
		aa	bec	bs	ctc	df	ec	g	h	s	sf	ts	ts1	ts2	ts3	wtc	wte	wte1	wte2			cold deciduous forest	taiga	cold mixed forest	cool conifer forest	temperate deciduous forest	cool mixed forest	broadleaved evergreen/warm mixed forest	xerophytic woods/scrub	steppe	desert	tundra	open conifer woodland			boreal forest	temperate forest	warm-temperate forest	grassland and dry shrubland	desert	tundra	savanna and dry woodland		sqrt	boreal forest	temperate forest	warm-temperate forest	grassland and dry shrubland	desert
Abies	Abies		1		1																	0	1	1	2	0	2	0	0	0	0	0	0			1	1	0	0	0	0	0		1.91565	1.91565	1.91565	0	0	0
Acer	Acer											1										0	0	0	0	1	1	1	0	0	0	0	0			0	1	1	0	0	0	0		0	0	0	0	0	0
Alnus rubra type																																				0	0	0	0	0	0	0		1.85482	0	0	0	0	0
Alnus sinuata type																																				0	0	0	0	0	0	0		0	0	0	0	0	0
Alnus undiff	Alnus undiff.	1		1		1																1	1	1	1	1	1	0	0	0	1	1	0			1	1	0	0	1	1	0		0	0	0	0	0	0
Ambrosia type	Ambrosia-type					1					1											0	0	0	0	0	0	0	0	1	1	0	1			0	0	0	1	1	0	1		0	0	0	0	0	0
Amelanchier type																																				0	0	0	0	0	0	0		0	0	0	0	0	0
Apiaceae	Umbelliferae/Apiacae	1				1					1											0	0	0	0	0	0	0	0	1	1	1	1			0	0	0	1	1	1	1		0	0	0	0	0	0
Arceuthobium																																				0	0	0	0	0	0	0		0.478913	0	0	0	0	0
Artemisia	Artemisia										1											0	0	0	0	0	0	0	0	1	0	0	1			0	0	0	1	0	0	1		0.957826	0	0	0	0.957826	0
Betula	Betula undiff.	1		1									1									1	1	2	2	2	2	0	0	0	0	1	0			1	1	0	0	0	1	0		0.478913	0.478913	0.478913	0	0	0
Bidens type																																				0	0	0	0	0	0	0		0	0	0	0	0	0
Botrychium																																				0	0	0	0	0	0	0		0	0	0	0	0	0
Brasenia																																				0	0	0	0	0	0	0		4.467	0	0	0	0	0
Brassicaceae	Brassicaceae	1				1					1											0	0	0	0	0	0	0	0	1	1	1	1			0	0	0	1	1	1	1		0	0	0	0	0	0
Camassia-t																																				0	0	0	0	0	0	0		0	0	0	0	0	0
Caryophyllaceae	Caryophyllaceae	1				1					1											0	0	0	0	0	0	0	0	1	1	1	1			0	0	0	1	1	1	1		0	0	0	0	0	0
Ceanothus/Rhamnus	Ceanothus											1							1			0	0	0	0	1	1	1	1	0	0	0	0			0	1	1	1	0	0	0		0.677285	0	0.677285	0.677285	0.677285	0
Chenopodiineae	Chenopodiaceae/Amaranthus					1					1											0	0	0	0	0	0	0	0	1	1	0	1			0	0	0	1	1	0	1		0.677285	0	0	0	0.677285	0.677285
Corylus																																				0	0	0	0	0	0	0		1.07088	0	0	0	0	0
Cupressaceae	Cupressacea/Taxaceae						1															1	1	1	1	1	1	1	1	0	0	0	1			1	1	1	1	0	0	1		0.677285	0.677285	0.677285	0.677285	0.677285	0
Cyperaceae	Cyperaceae									1												0	0	0	0	0	0	0	0	1	0	1	0			0	0	0	1	0	1	0		0.677285	0	0	0	0.677285	0
Diploxylon Pinus																																				0	0	0	0	0	0	0		4.38931	0	0	0	0	0
Dodecatheon type																																				0	0	0	0	0	0	0		0	0	0	0	0	0
Dryopteris																																				0	0	0	0	0	0	0		0	0	0	0	0	0
Eleagnus																																				0	0	0	0	0	0	0		0	0	0	0	0	0
Ephedra	Ephedra					1					1											0	0	0	0	0	0	0	0	1	1	0	1			0	0	0	1	1	0	1		0	0	0	0	0	0
Equisetum																																				0	0	0	0	0	0	0		0	0	0	0	0	0
Ericaceae	Ericaceae								1													1	1	1	1	1	1	1	0	0	0	1	0			1	1	1	0	0	1	0		0	0	0	0	0	0
Eriogonum	Eriogonum					1					1											0	0	0	0	0	0	0	0	1	1	0	1			0	0	0	1	1	0	1		0	0	0	0	0	0
Fabaceae	Fabaceae	1				1					1			1								0	0	0	0	1	0	0	0	1	1	1	1			0	1	0	1	1	1	1		0	0	0	0	0	0
Fraxinus	Fraxinus											1										0	0	0	0	1	1	1	0	0	0	0	0			0	1	1	0	0	0	0		0.478913	0	0.478913	0.478913	0	0
Galium																																				0	0	0	0	0	0	0		0	0	0	0	0	0
Gilia-type																																				0	0	0	0	0	0	0		0	0	0	0	0	0
Haploxylon Pinus																																				0	0	0	0	0	0	0		1.85482	0	0	0	0	0
Indeterminate																																				0	0	0	0	0	0	0		0	0	0	0	0	0
Isoetes																																				0	0	0	0	0	0	0		0	0	0	0	0	0
Lamiaceae																																				0	0	0	0	0	0	0		0	0	0	0	0	0
Lemna																																				0	0	0	0	0	0	0		0	0	0	0	0	0
Liguliflorae																																				0	0	0	0	0	0	0		0	0	0	0	0	0
Liliaceae																																				0	0	0	0	0	0	0		0	0	0	0	0	0
Myriophyllum																																				0	0	0	0	0	0	0		0	0	0	0	0	0
Nuphar																																				0	0	0	0	0	0	0		0	0	0	0	0	0
Onagraceae																																				0	0	0	0	0	0	0		0	0	0	0	0	0
Other herbs																																				0	0	0	0	0	0	0		0	0	0	0	0	0
Other Ranunculus																																				0	0	0	0	0	0	0		0	0	0	0	0	0
Other Rosaceae																																				0	0	0	0	0	0	0		0	0	0	0	0	0
Other Tubuliflorae	Tubuliflorae/Other Asteraceae					1					1											0	0	0	0	0	0	0	0	1	1	0	1			0	0	0	1	1	0	1		0.478913	0	0	0	0.478913	0.478913
Pediastrum																																				0	0	0	0	0	0	0		0.677285	0	0	0	0	0
Phlox-type																																				0	0	0	0	0	0	0		0	0	0	0	0	0
Picea	Picea		1		1																	0	1	1	2	0	2	0	0	0	0	0	0			1	1	0	0	0	0	0		0.829502	0.829502	0.829502	0	0	0
Plantago	Platanus													1								0	0	0	0	1	0	0	0	0	0	0	0			0	1	0	0	0	0	0		0.677285	0	0.677285	0	0	0
Plectritus type																																				0	0	0	0	0	0	0		0	0	0	0	0	0
Poaceae	Poaceae							1														0	0	0	0	0	0	0	0	1	1	1	0			0	0	0	1	1	1	0		1.17309	0	0	0	1.17309	1.17309
Polgonum amphibium																																				0	0	0	0	0	0	0		0	0	0	0	0	0
Polygonum californicum type																																				0	0	0	0	0	0	0		0	0	0	0	0	0
Polygonum undiff																																				0	0	0	0	0	0	0		0	0	0	0	0	0
Populus balsamifera type																																				0	0	0	0	0	0	0		0	0	0	0	0	0
Populus tremuloides type																																				0	0	0	0	0	0	0		0.478913	0	0	0	0	0
Populus undiff	Populus			1								1										1	1	1	1	2	2	1	0	0	0	0	0			1	1	1	0	0	0	0		0	0	0	0	0	0
Potamogeton																																				0	0	0	0	0	0	0		0	0	0	0	0	0
Potentilla type	Potentilla-type	1									1											0	0	0	0	0	0	0	0	1	0	1	1			0	0	0	1	0	1	1		0	0	0	0	0	0
Prunus type																																				0	0	0	0	0	0	0		0	0	0	0	0	0
Pseudotsuga/Larix	Larix/Pseudotsuga			1	1								1									1	1	3	3	2	3	0	0	0	0	0	0			1	1	0	0	0	0	0		2.48851	2.48851	2.48851	0	0	0
Pteridium-																																				0	0	0	0	0	0	0		0.478913	0	0	0	0	0
Quercus	Quercus											1					1		1			0	0	0	0	1	1	2	2	0	0	0	0			0	1	1	1	0	0	0		2.95222	0	2.95222	2.95222	2.95222	0
Rhus																																				0	0	0	0	0	0	0		0	0	0	0	0	0
Rumex																																				0	0	0	0	0	0	0		0.677285	0	0	0	0	0
Sagittaria																																				0	0	0	0	0	0	0		0	0	0	0	0	0
Salix	Salix	1		1								1										1	1	1	1	2	2	1	0	0	0	1	0			1	1	1	0	0	1	0		0	0	0	0	0	0
Sambucus																																				0	0	0	0	0	0	0		0	0	0	0	0	0
Sarcobatus	Sarcobatus										1											0	0	0	0	0	0	0	0	1	0	0	1			0	0	0	1	0	0	1		0	0	0	0	0	0
Saxifragaceae	Saxifragaceae	1									1											0	0	0	0	0	0	0	0	1	0	1	1			0	0	0	1	0	1	1		0	0	0	0	0	0
Selaginella densa type																																				0	0	0	0	0	0	0		0	0	0	0	0	0
Sheperdia canadensis	Shepherdia canadensis			1																		1	1	1	1	1	1	0	0	0	0	0	0			1	1	0	0	0	0	0		0	0	0	0	0	0
Sparganium																																				0	0	0	0	0	0	0		0	0	0	0	0	0
Sphaeralceae	Sphaeralcea-type					1					1											0	0	0	0	0	0	0	0	1	1	0	1			0	0	0	1	1	0	1		0	0	0	0	0	0
Spiraea type																																				0	0	0	0	0	0	0		0	0	0	0	0	0
Taxus	Taxaceae				1																	0	0	1	1	0	1	0	0	0	0	0	0			1	1	0	0	0	0	0		0	0	0	0	0	0
Thalictrum	Thalictrum	1																				0	0	0	0	0	0	0	0	0	0	1	0			0	0	0	0	0	1	0		0	0	0	0	0	0
Tsuga heterophylla	Tsuga				1																	0	0	1	1	0	1	0	0	0	0	0	0			1	1	0	0	0	0	0		2.2463	2.2463	2.2463	0	0	0
Tsuga mertensiana	Tsuga				1																	0	0	1	1	0	1	0	0	0	0	0	0			1	1	0	0	0	0	0		0.478913	0.478913	0.478913	0	0	0
Typha latifolia type																																				0	0	0	0	0	0	0		0	0	0	0	0	0
Undiff Pinus	Pinus						1															1	1	1	1	1	1	1	1	0	0	0	1			1	1	1	1	0	0	1		4.59357	4.59357	4.59357	4.59357	4.59357	0
Unknown																																				0	0	0	0	0	0	0		0.478913	0	0	0	0	0
Unknown triporate																																				0	0	0	0	0	0	0		0	0	0	0	0	0
Urtica-typ																																				0	0	0	0	0	0	0		0	0	0	0	0	0
Valeriana																																				0	0	0	0	0	0	0		0	0	0	0	0	0
																																													13.7086	18.4944	9.37928	12.8648	2.32929
[truncated: 2 more columns]

## Sheet: Potato Lake
		arctic/alpine dwarf shrub	boreal evergreen conifer	boreal summergreen	cool temperate conifer	desert forb	eurythermic conifer	grass	heath	sedge	steppe forb	temperate summergreen	cool-temperate summergreen	intermediate-temperate summergreen	warm-temperate summergreen	warm-temperate conifer	warm-temperate broadleaved evergreen	cool-temperate broadleaved evergreen	warm-temperate sclerophyll shrub			Biomes
		aa	bec	bs	ctc	df	ec	g	h	s	sf	ts	ts1	ts2	ts3	wtc	wte	wte1	wte2			cold deciduous forest	taiga	cold mixed forest	cool conifer forest	temperate deciduous forest	cool mixed forest	broadleaved evergreen/warm mixed forest	xerophytic woods/scrub	steppe	desert	tundra	open conifer woodland			boreal forest	temperate forest	warm-temperate forest	grassland and dry shrubland	desert	tundra	savanna and dry woodland		sqrt	boreal forest	temperate forest	warm-temperate forest	grassland and dry shrubland	desert
Abies	Abies		1		1																	0	1	1	1	0	1	0	0	0	0	0	0			1	1	0	0	0	0	0		0	0	0	0	0	0
Ambrosia	Ambrosia-type					1					1											0	0	0	0	0	0	0	0	1	1	0	1			0	0	0	1	1	0	1		0	0	0	0	0	0
Artemisia	Artemisia										1											0	0	0	0	0	0	0	0	1	0	0	1			0	0	0	1	0	0	1		0	0	0	0	0	0
Botryococcus																																				0	0	0	0	0	0	0		0	0	0	0	0	0
Caryophyllaceae	Caryophyllaceae	1				1					1											0	0	0	0	0	0	0	0	1	1	1	1			0	0	0	1	1	1	1		0	0	0	0	0	0
Cercocarupus	Cercocarpus-type										1											0	0	0	0	0	0	0	0	1	0	0	1			0	0	0	1	0	0	1		0	0	0	0	0	0
cf. Brasenia																																				0	0	0	0	0	0	0		0	0	0	0	0	0
Cheno-Am	Chenopodiaceae/Amaranthus					1					1											0	0	0	0	0	0	0	0	1	1	0	1			0	0	0	1	1	0	1		0	0	0	0	0	0
Cruciferae																																				0	0	0	0	0	0	0		0	0	0	0	0	0
Cupressaceae	Cupressacea/Taxaceae						1															1	1	1	1	1	1	1	1	0	0	0	1			1	1	1	1	0	0	1		0	0	0	0	0	0
Cyperaceae	Cyperaceae									1												0	0	0	0	0	0	0	0	1	0	1	0			0	0	0	1	0	1	0		0	0	0	0	0	0
Gramineae	Poaceae							1														0	0	0	0	0	0	0	0	1	1	1	0			0	0	0	1	1	1	0		0	0	0	0	0	0
Leguminosae	Fabaceae	1				1					1			1								0	0	0	0	1	0	0	0	1	1	1	1			0	1	0	1	1	1	1		0	0	0	0	0	0
Monolete Spores																																				0	0	0	0	0	0	0		0	0	0	0	0	0
Other Compositae																																				0	0	0	0	0	0	0		0	0	0	0	0	0
Pediastrum																																				0	0	0	0	0	0	0		0	0	0	0	0	0
Picea	Picea		1		1																	0	1	1	1	0	1	0	0	0	0	0	0			1	1	0	0	0	0	0		0	0	0	0	0	0
Pinus diploxylon	Pinus						1															1	1	1	1	1	1	1	1	0	0	0	1			1	1	1	1	0	0	1		0	0	0	0	0	0
Pinus haploxylon	Pinus						1															1	1	1	1	1	1	1	1	0	0	0	1			1	1	1	1	0	0	1		0	0	0	0	0	0
Pinus pinyon-type	Pinus						1															1	1	1	1	1	1	1	1	0	0	0	1			1	1	1	1	0	0	1		0	0	0	0	0	0
Polemonium																																				0	0	0	0	0	0	0		0	0	0	0	0	0
Polygonum bistortoides	Polygonum bistortoides-type	1																				0	0	0	0	0	0	0	0	0	0	1	0			0	0	0	0	0	1	0		0	0	0	0	0	0
Potamogeton																																				0	0	0	0	0	0	0		0	0	0	0	0	0
Prunus/Amelanchier																																				0	0	0	0	0	0	0		0	0	0	0	0	0
Pseudotsuga	Pseudotsuga				1																	0	0	1	1	0	1	0	0	0	0	0	0			1	1	0	0	0	0	0		0	0	0	0	0	0
Quercus	Quercus											1					1		1			0	0	0	0	1	1	1	1	0	0	0	0			0	1	1	1	0	0	0		0	0	0	0	0	0
Ranunculus	Ranunculaceae	1				1					1											0	0	0	0	0	0	0	0	1	1	1	1			0	0	0	1	1	1	1		0	0	0	0	0	0
Rosaceae																																				0	0	0	0	0	0	0		0	0	0	0	0	0
Salix	Salix	1		1								1										1	1	1	1	1	1	1	0	0	0	1	0			1	1	1	0	0	1	0		0	0	0	0	0	0
Sarcobatus	Sarcobatus										1											0	0	0	0	0	0	0	0	1	0	0	1			0	0	0	1	0	0	1		0	0	0	0	0	0
Thalictrum	Thalictrum	1																				0	0	0	0	0	0	0	0	0	0	1	0			0	0	0	0	0	1	0		0	0	0	0	0	0
Trilete Spores																																				0	0	0	0	0	0	0		0	0	0	0	0	0
Typha latifolia																																				0	0	0	0	0	0	0		0	0	0	0	0	0
Umbelliferae	Umbelliferae/Apiacae	1				1					1											0	0	0	0	0	0	0	0	1	1	1	1			0	0	0	1	1	1	1		0	0	0	0	0	0
																																													0	0	0	0	0
[truncated: 2 more columns]

## Sheet: San Felipe
		arctic/alpine dwarf shrub	boreal evergreen conifer	boreal summergreen	cool temperate conifer	desert forb	eurythermic conifer	grass	heath	sedge	steppe forb	temperate summergreen	cool-temperate summergreen	intermediate-temperate summergreen	warm-temperate summergreen	warm-temperate conifer	warm-temperate broadleaved evergreen	cool-temperate broadleaved evergreen	warm-temperate sclerophyll shrub			Biomes
		aa	bec	bs	ctc	df	ec	g	h	s	sf	ts	ts1	ts2	ts3	wtc	wte	wte1	wte2			cold deciduous forest	taiga	cold mixed forest	cool conifer forest	temperate deciduous forest	cool mixed forest	broadleaved evergreen/warm mixed forest	xerophytic woods/scrub	steppe	desert	tundra	open conifer woodland			boreal forest	temperate forest	warm-temperate forest	grassland and dry shrubland	desert	tundra	savanna and dry woodland		sqrt	boreal forest	temperate forest	warm-temperate forest	grassland and dry shrubland	desert
Abies	Abies		1		1																	0	1	1	2	0	2	0	0	0	0	0	0			1	1	0	0	0	0	0		0	0	0	0	0	0
Acalypha	Euphorbiaceae					1																0	0	0	0	0	0	0	0	0	1	0	0			0	0	0	0	1	0	0		0	0	0	0	0	0
Agavaceae																																				0	0	0	0	0	0	0		0	0	0	0	0	0
Allionia incarnata																																				0	0	0	0	0	0	0		0	0	0	0	0	0
Alnus	Alnus undiff.	1		1		1																1	1	1	1	1	1	0	0	0	1	1	0			1	1	0	0	1	1	0		0	0	0	0	0	0
Ambrosia	Ambrosia-type					1					1											0	0	0	0	0	0	0	0	1	1	0	1			0	0	0	1	1	0	1		0	0	0	0	0	0
Arcotostaphylos																																				0	0	0	0	0	0	0		0	0	0	0	0	0
Artemisia	Artemisia										1											0	0	0	0	0	0	0	0	1	0	0	1			0	0	0	1	0	0	1		0	0	0	0	0	0
Asteraceae high spine	Tubuliflorae/Other Asteraceae					1					1											0	0	0	0	0	0	0	0	1	1	0	1			0	0	0	1	1	0	1		0	0	0	0	0	0
Asteraceae low	Tubuliflorae/Other Asteraceae					1					1											0	0	0	0	0	0	0	0	1	1	0	1			0	0	0	1	1	0	1		0	0	0	0	0	0
Bursera																																				0	0	0	0	0	0	0		0	0	0	0	0	0
Cheno-Am.	Chenopodiaceae/Amaranthus					1					1											0	0	0	0	0	0	0	0	1	1	0	1			0	0	0	1	1	0	1		0	0	0	0	0	0
Cirsium																																				0	0	0	0	0	0	0		0	0	0	0	0	0
Cruciferae																																				0	0	0	0	0	0	0		0	0	0	0	0	0
Cyperaceae	Cyperaceae									1												0	0	0	0	0	0	0	0	1	0	1	0			0	0	0	1	0	1	0		0	0	0	0	0	0
Ephedra 1	Ephedra					1					1											0	0	0	0	0	0	0	0	1	1	0	1			0	0	0	1	1	0	1		0	0	0	0	0	0
Ephedra 2	Ephedra					1					1											0	0	0	0	0	0	0	0	1	1	0	1			0	0	0	1	1	0	1		0	0	0	0	0	0
Eryngium	Umbelliferae/Apiaceae	1				1					1											0	0	0	0	0	0	0	0	1	1	1	1			0	0	0	1	1	1	1		0	0	0	0	0	0
Ferns																																				0	0	0	0	0	0	0		0	0	0	0	0	0
Fungi																																				0	0	0	0	0	0	0		0	0	0	0	0	0
Galium																																				0	0	0	0	0	0	0		0	0	0	0	0	0
Juniperus																																				0	0	0	0	0	0	0		0	0	0	0	0	0
Onagraceae																																				0	0	0	0	0	0	0		0	0	0	0	0	0
Pinus	Pinus						1															1	1	1	1	1	1	1	1	0	0	0	1			1	1	1	1	0	0	1		0	0	0	0	0	0
Plantago																																				0	0	0	0	0	0	0		0	0	0	0	0	0
Poaceae	Poaceae							1														0	0	0	0	0	0	0	0	1	1	1	0			0	0	0	1	1	1	0		0	0	0	0	0	0
Polemoniaceae																																				0	0	0	0	0	0	0		0	0	0	0	0	0
Polygonace																																				0	0	0	0	0	0	0		0	0	0	0	0	0
Potamogeton																																				0	0	0	0	0	0	0		0	0	0	0	0	0
Quercus	Quercus											1					1		1			0	0	0	0	1	1	2	2	0	0	0	0			0	1	1	1	0	0	0		0	0	0	0	0	0
Ranunculaceae	Ranunculaceae	1				1					1											0	0	0	0	0	0	0	0	1	1	1	1			0	0	0	1	1	1	1		0	0	0	0	0	0
Rhus sp.																																				0	0	0	0	0	0	0		0	0	0	0	0	0
Rosaceae																																				0	0	0	0	0	0	0		0	0	0	0	0	0
Rubiaceae																																				0	0	0	0	0	0	0		0	0	0	0	0	0
Sarcobatus	Sarcobatus										1											0	0	0	0	0	0	0	0	1	0	0	1			0	0	0	1	0	0	1		0	0	0	0	0	0
Spirogyra																																				0	0	0	0	0	0	0		0	0	0	0	0	0
Tipo Hydrocotile																																				0	0	0	0	0	0	0		0	0	0	0	0	0
Typha																																				0	0	0	0	0	0	0		0	0	0	0	0	0
unidentified																																				0	0	0	0	0	0	0		0	0	0	0	0	0
Urticaceae																																				0	0	0	0	0	0	0		0	0	0	0	0	0
Zygnema tipo 74																																				0	0	0	0	0	0	0		0	0	0	0	0	0
																																													0	0	0	0	0
[truncated: 2 more columns]
