# Supplementary material for: Terrestrial biosphere changes over the last 120 kyr
Source: Copernicus journal article supplement (doi:10.5194/cp-12-51-2016), 2016-01-18
Supplement: Supplementary file 1 [file cp-12-51-2016-supplement.zip › supplement/North_America/BiomizationWilliamsetal2000.xls]

## Sheet: 2 cm
		arctic/alpine shrub or herb	boreal evergreen conifer	boreal summergreen	cool-temperate conifer	desert forb	eurythermic conifer	grass	heath	sedge	steppe forb	temperate summergreen	cool-temperate summergreen	intermediate-temperate summergreen	warm-temperate summergreen	warm-temperate conifer	warm-temperate broadleaved evergreen	cool-temperate broadleaved evergreen	warm-temperate sclerophyll shrub			Biomes
		aa	bec	bs	ctc	df	ec	g	h	s	sf	ts	ts1	ts2	ts3	wtc	wte	wte1	wte2			Desert	xerophytic woods/scrub	cold deciduous forest	tundra	broadleaved evergreen/warm mixed forest	steppe	open conifer woodland	temperate deciduous forest	taiga	cold mixed forest	cool conifer forest	cool mixed forest		sqrt	Desert	xerophytic woods/scrub	cold deciduous forest	tundra	broadleaved evergreen/warm mixed forest	steppe	open conifer woodland	temperate deciduous forest	taiga	cold mixed forest	cool conifer forest	cool mixed forest
Acer rubrum	Acer											1										0	0	0	0	1	0	0	1	0	0	0	1		0	0	0	0	0	0	0	0	0	0	0	0	0
Alnus type crispa	Alnus	1		1		1																1	0	1	1	0	0	0	1	1	1	1	1		3.63111	3.63111	0	3.63111	3.63111	0	0	0	3.63111	3.63111	3.63111	3.63111	3.63111
Alnus type incana	Alnus	1		1		1																1	0	1	1	0	0	0	1	1	1	1	1		0.827606	0.827606	0	0.827606	0.827606	0	0	0	0.827606	0.827606	0.827606	0.827606	0.827606
Apiaceae	Apiaceae	1				1					1											1	0	0	1	0	1	1	0	0	0	0	0		0.413803	0.413803	0	0	0.413803	0	0.413803	0.413803	0	0	0	0	0
Armeria maritima	Plumbaginaceae																																		0	0	0	0	0	0	0	0	0	0	0	0	0
Artemisia	Artemisia										1											0	0	0	0	0	1	1	0	0	0	0	0		1.24141	0	0	0	0	0	1.24141	1.24141	0	0	0	0	0
Betula	Betula	1		1									1									0	0	1	1	0	0	0	1	1	1	1	1		6.10973	0	0	6.10973	6.10973	0	0	0	6.10973	6.10973	6.10973	6.10973	6.10973
Botrychium																																			0.585206	0	0	0	0	0	0	0	0	0	0	0	0
Brassicaceae	Brassicaceae	1				1					1											1	0	0	1	0	1	1	0	0	0	0	0		0.413803	0.413803	0	0	0.413803	0	0.413803	0.413803	0	0	0	0	0
Carya ovata	Carya											1										0	0	0	0	1	0	0	1	0	0	0	1		0	0	0	0	0	0	0	0	0	0	0	0	0
Caryophyllaceae	Caryophyllaceae	1				1					1											1	0	0	1	0	1	1	0	0	0	0	0		0.716728	0.716728	0	0	0.716728	0	0.716728	0.716728	0	0	0	0	0
Castanea dentata	Castanea													1								0	0	0	0	0	0	0	1	0	0	0	0		0	0	0	0	0	0	0	0	0	0	0	0	0
cf. Callitriche																																			0	0	0	0	0	0	0	0	0	0	0	0	0
cf. Diapensia lapponica	Diapensia																																		0	0	0	0	0	0	0	0	0	0	0	0	0
Chenopodiaceae	Chenopodiaceae/Amaranthaceae					1					1											1	0	0	0	0	1	1	0	0	0	0	0		0.413803	0.413803	0	0	0	0	0.413803	0.413803	0	0	0	0	0
Cyperaceae	Cyperaceae									1												0	0	0	1	0	1	0	0	0	0	0	0		4.43754	0	0	0	4.43754	0	4.43754	0	0	0	0	0	0
Dryas	Dryas																																		0	0	0	0	0	0	0	0	0	0	0	0	0
Epilobium type angustifolium	Epilobium angustifolium																																		0	0	0	0	0	0	0	0	0	0	0	0	0
Equisetum																																			0	0	0	0	0	0	0	0	0	0	0	0	0
Ericaceae	Ericaceae																																		1.60265	0	0	0	0	0	0	0	0	0	0	0	0
Fabaceae	Fabaceae	1				1					1			1								1	0	0	1	0	1	1	1	0	0	0	0		0	0	0	0	0	0	0	0	0	0	0	0	0
Fraxinus type pennsylvanica	Fraxinus											1										0	0	0	0	1	0	0	1	0	0	0	1		0	0	0	0	0	0	0	0	0	0	0	0	0
Galium	Galium																																		0	0	0	0	0	0	0	0	0	0	0	0	0
Huperzia type selago																																			0.925292	0	0	0	0	0	0	0	0	0	0	0	0
Indeterminables																																			0.585206	0	0	0	0	0	0	0	0	0	0	0	0
Juglans cinerea	Juglans													1								0	0	0	0	0	0	0	1	0	0	0	0		0	0	0	0	0	0	0	0	0	0	0	0	0
Koenigia islandica	Koenigia islandica																																		0	0	0	0	0	0	0	0	0	0	0	0	0
Liguliflorae	Liguliflorae																																		0	0	0	0	0	0	0	0	0	0	0	0	0
Lycopodiella inundata																																			0	0	0	0	0	0	0	0	0	0	0	0	0
Lycopodium annotinum																																			2.55085	0	0	0	0	0	0	0	0	0	0	0	0
Lycopodium clavatum																																			0	0	0	0	0	0	0	0	0	0	0	0	0
Monolete spores																																			2.2284	0	0	0	0	0	0	0	0	0	0	0	0
Myrica gale	Myricaceae			1								1										0	0	1	0	1	0	0	1	1	1	1	1		0	0	0	0	0	0	0	0	0	0	0	0	0
Osmunda cinnamomea																																			0	0	0	0	0	0	0	0	0	0	0	0	0
Papaveraceae	Papaveraceae																																		0	0	0	0	0	0	0	0	0	0	0	0	0
Picea (fragments de)																																			0.413803	0	0	0	0	0	0	0	0	0	0	0	0
Picea type mariana	Picea		1		1																	0	0	0	0	0	0	0	0	0	1	1	1		1.01361	0	0	0	0	0	0	0	0	0	1.01361	1.01361	1.01361
Pinus	Pinus undiff						1															0	1	1	0	1	0	1	1	1	1	1	1		0	0	0	0	0	0	0	0	0	0	0	0	0
Pinus (fragments de)																																			0	0	0	0	0	0	0	0	0	0	0	0	0
Pinus cf. P. banksiana	Pinus banksiana-type																																		0.827606	0	0	0	0	0	0	0	0	0	0	0	0
Pinus strobus	Pinus strobus				1																	0	0	0	0	0	0	0	0	0	1	1	1		0.585206	0	0	0	0	0	0	0	0	0	0.585206	0.585206	0.585206
Plantago	Plantago undiff.																																		0	0	0	0	0	0	0	0	0	0	0	0	0
Poaceae	Poaceae							1														1	0	0	1	0	1	0	0	0	0	0	0		1.65521	1.65521	0	0	1.65521	0	1.65521	0	0	0	0	0	0
Polygonum	Polygonum																																		0	0	0	0	0	0	0	0	0	0	0	0	0
Polygonum type viviparum	Polygonum viviparum																																		0	0	0	0	0	0	0	0	0	0	0	0	0
Populus cf. P. tremuloides	Populus			1								1										0	0	1	0	1	0	0	1	1	1	1	1		0	0	0	0	0	0	0	0	0	0	0	0	0
Potamogeton/Triglochin																																			0	0	0	0	0	0	0	0	0	0	0	0	0
Quercus	Quercus											1					1		1			0	1	0	0	1	0	0	1	0	0	0	1		0	0	0	0	0	0	0	0	0	0	0	0	0
Ranunculaceae	Ranunculaceae	1				1					1											1	0	0	1	0	1	1	0	0	0	0	0		0.413803	0.413803	0	0	0.413803	0	0.413803	0.413803	0	0	0	0	0
Rosaceae	Rosaceae undiff.																																		0	0	0	0	0	0	0	0	0	0	0	0	0
Salix	Salix	Salix	1		1								1										0	0	1	1	1	0	0	1	1	1	1		1.30856	0	0	0	1.30856	1.30856	1.30856	0	0	1.30856	1.30856	1.30856	1.30856
Salix type herbacea	Salix herbacea-type	Salix	1		1								1										0	0	1	1	1	0	0	1	1	1	1		1.65521	0	0	0	1.65521	1.65521	1.65521	0	0	1.65521	1.65521	1.65521	1.65521
Saxifraga type cernua	Saxifraga cernua-type	Saxifragaceae	1									1											0	0	0	1	0	1	1	0	0	0	0		0	0	0	0	0	0	0	0	0	0	0	0	0
Saxifraga type oppositifolia	Saxifraga oppositifolia	Saxifragaceae	1									1											0	0	0	1	0	1	1	0	0	0	0		0	0	0	0	0	0	0	0	0	0	0	0	0
Saxifraga type stellaris	Saxifraga	Saxifragaceae	1									1											0	0	0	1	0	1	1	0	0	0	0		0	0	0	0	0	0	0	0	0	0	0	0	0
Sphagnum	Sphagnum																																		0.925292	0	0	0	0	0	0	0	0	0	0	0	0
Taxus canadensis	Taxus																																		0	0	0	0	0	0	0	0	0	0	0	0	0
Thalictrum	Thalictrum																																		0	0	0	0	0	0	0	0	0	0	0	0	0
Thuja occidentalis/Juniperus communis	Juniperis communis																																		0	0	0	0	0	0	0	0	0	0	0	0	0
Trilete spores																																			0	0	0	0	0	0	0	0	0	0	0	0	0
Tsuga canadensis	Tsuga				1																	0	0	0	0	0	0	0	0	0	1	1	1		0	0	0	0	0	0	0	0	0	0	0	0	0
Tubuliflorae	Asteraceae					1					1											1	0	0	0	0	1	1	0	0	0	0	0		0.585206	0.585206	0	0	0	0	0.585206	0.585206	0	0	0	0	0
type Ambrosia	Ambrosia					1					1											1	0	0	0	0	1	1	0	0	0	0	0		0.413803	0.413803	0	0	0	0	0.413803	0.413803	0	0	0	0	0
type Campanula	Campanula-type																																		0	0	0	0	0	0	0	0	0	0	0	0	0
type Dryopteris																																			0	0	0	0	0	0	0	0	0	0	0	0	0
type Oxyria digyna	Oxyria	1																				0	0	0	1	0	0	0	0	0	0	0	0		0	0	0	0	0	0	0	0	0	0	0	0	0
type Potentilla palustris	Potentilla-type																																		0	0	0	0	0	0	0	0	0	0	0	0	0
type Veronica																																			0	0	0	0	0	0	0	0	0	0	0	0	0
type Woodsia																																			0	0	0	0	0	0	0	0	0	0	0	0	0
Ulmus	Ulmus											1										0	0	0	0	1	0	0	1	0	0	0	1		0	0	0	0	0	0	0	0	0	0	0	0	0
																																				9.48487	0	10.5684	21.5831	2.96377	13.6689	4.61236	10.5684	13.5322	15.131	15.131	15.131

## Sheet: pollen counts
Depth (cm)		2			5	10	15	20	25	30	35	40	45	50			55	60	65	70	75	80	85	90	92.5	95	97.5	100	102.5	105	107.5	110	112.5	115	116.5	120			122	127	130	135	140	145	150	155	160	165	170
Age		Holocene	%	sqrt	Holocene	Holocene	Holocene	Holocene	Holocene	Holocene	Holocene	Holocene	Holocene	Holocene	%	sqrt	Holocene	Holocene	Holocene	Holocene	Holocene	Holocene	Holocene	Holocene	Holocene	Holocene	Holocene	Holocene	Holocene	Holocene	Holocene	Holocene	Holocene	Holocene	Holocene	Last Interglacial	%	sqrt	Last Interglacial	Last Interglacial	Last Interglacial	Last Interglacial	Last Interglacial	Last Interglacial	Last Interglacial	Last Interglacial	Last Interglacial	Last Interglacial	Last Interglacial
Acer rubrum		0	0	0	0	0	0	0	0	1	0	0	0	0	0	0	0	0	0	0	0	0	0	0	0	0	0	0	0	0	0	0	0	0	0	0	0	0	0	0	0	0	0	0	0	0	0	0	0
Alnus type crispa		107	17.6568	4.202	109	119	179	166	146	55	52	47	35	35	9.66851	3.10942	21	33	6	9	7	18	7	7	7	15	11	3	6	11	8	4	17	14	23	81	12.9187	3.59425	95	88	102	148	142	112	130	118	111	45	95
Alnus type incana		0	0	0	6	8	0	5	3	5	0	2	1	1	0.276243	0.525588	0	0	0	0	0	0	0	0	1	1	0	0	0	2	0	0	1	0	2	1	0.15949	0.399362	1	3	1	2	5	3	1	1	5	4	4
Apiaceae		0	0	0	0	0	0	0	0	0	0	0	0	0	0	0	0	0	0	0	0	0	0	0	1	0	0	0	0	0	0	0	0	0	0	0	0	0	0	0	0	0	0	0	0	0	0	0	0
Armeria maritima		0	0	0	0	0	0	0	0	1	0	1	0	0	0	0	0	0	1	1	0	0	0	0	0	0	0	0	0	0	0	1	0	0	0	0	0	0	0	0	0	0	0	0	0	0	0	0	0
Artemisia		23	3.79538	1.94817	24	33	29	17	22	8	15	12	11	11	3.03867	1.74318	16	1	6	4	4	2	6	1	4	4	3	1	1	0	3	3	3	1	5	8	1.27592	1.12956	8	3	6	2	3	2	17	3	2	6	6
Betula		75	12.3762	3.51799	82	51	96	88	73	82	40	59	36	34	9.39227	3.06468	36	54	23	18	20	38	17	17	19	39	24	17	25	28	16	46	52	39	72	163	25.9968	5.09871	311	221	307	256	271	284	229	264	339	255	255
Botrychium		1	0.165017	0.406222	0	0	0	0	0	8	1	1	0	1	0.276243	0.525588	0	2	0	0	0	0	0	0	0	1	1	1	0	2	4	0	0	1	0	2	0.318979	0.564782	0	0	0	2	2	1	4	1	1	2	3
Brassicaceae		0	0	0	1	0	1	1	0	0	1	3	2	0	0	0	1	0	1	1	2	0	1	1	1	0	2	2	0	3	0	2	2	0	0	1	0.15949	0.399362	0	0	0	0	0	0	1	1	0	1	0
Carya ovata		0	0	0	0	0	0	0	0	0	0	0	0	0	0	0	0	0	0	0	1	0	0	0	0	0	0	0	0	0	0	0	0	0	0	1	0.15949	0.399362	0	0	0	0	0	0	0	0	0	0	0
Caryophyllaceae		4	0.660066	0.812444	12	1	2	6	27	70	34	28	7	7	1.9337	1.39058	15	5	8	8	13	18	15	11	8	8	12	11	3	1	2	1	6	5	6	8	1.27592	1.12956	2	2	0	7	1	5	9	0	4	6	4
Castanea dentata		0	0	0	0	0	0	0	0	0	0	0	0	0	0	0	0	0	0	0	0	0	0	0	0	0	0	0	0	0	0	0	0	0	0	0	0	0	0	0	0	0	1	0	0	0	0	0	0
cf. Callitriche		0	0	0	0	0	0	0	0	0	0	0	0	0	0	0	0	2	0	0	0	1	0	0	0	0	0	0	0	0	1	0	0	0	0	0	0	0	0	0	0	0	0	0	0	0	0	0	0
cf. Diapensia lapponica		0	0	0	0	0	0	0	1	0	1	0	0	0	0	0	0	0	0	0	0	0	1	0	0	0	0	0	0	0	0	0	0	0	0	0	0	0	0	0	0	0	0	0	0	0	0	0	1
Chenopodiaceae		2	0.330033	0.574485	3	4	1	1	0	2	2	1	3	2	0.552486	0.743294	2	2	2	1	1	0	1	0	3	0	1	0	1	3	0	1	2	1	3	1	0.15949	0.399362	1	1	1	2	0	0	2	2	1	5	3
Cyperaceae		111	18.3168	4.27982	102	85	76	101	124	90	141	174	43	48	13.2597	3.64138	236	121	78	74	29	120	31	22	8	67	21	23	30	41	7	7	10	5	20	146	23.2855	4.8255	103	114	91	168	111	161	166	98	114	102	165
Dryas		0	0	0	0	4	1	0	0	2	4	1	1	1	0.276243	0.525588	1	0	2	0	0	0	1	4	6	3	2	0	4	0	0	5	0	1	0	0	0	0	0	0	0	0	0	0	0	0	0	0	0
Epilobium type angustifolium		0	0	0	0	0	0	0	0	2	0	0	0	0	0	0	0	0	0	0	0	0	0	0	0	0	1	0	0	0	0	0	1	0	0	0	0	0	0	0	0	0	0	0	0	0	0	0	1
Equisetum		0	0	0	0	0	0	1	0	0	0	0	0	0	0	0	0	0	0	0	0	0	0	0	1	1	0	0	0	0	0	0	0	0	0	0	0	0	0	0	0	0	0	0	0	0	0	1	0
Ericaceae		29	4.78548	2.18757	39	41	29	14	17	30	30	38	31	21	5.8011	2.40855	26	22	14	23	25	16	24	16	14	9	17	4	4	2	4	1	4	3	8	25	3.98724	1.99681	10	7	4	4	7	11	8	8	5	35	13
Fabaceae		0	0	0	0	0	1	0	0	0	1	0	0	1	0.276243	0.525588	0	0	0	0	0	0	0	0	0	0	0	0	0	0	1	0	0	0	0	0	0	0	0	0	0	0	0	0	0	0	0	0	0
Fraxinus type pennsylvanica		0	0	0	0	1	0	0	0	0	0	0	1	0	0	0	0	0	0	0	1	0	0	1	0	0	0	0	0	2	0	0	0	0	0	0	0	0	0	0	0	0	0	0	0	0	0	0	0
Galium		0	0	0	0	0	0	0	0	0	0	0	0	0	0	0	0	0	0	0	0	0	0	0	0	0	1	0	0	0	0	0	0	0	0	0	0	0	0	0	0	0	0	0	0	0	0	0	0
Huperzia type selago		22	3.63036	1.90535	6	21	8	8	18	20	13	12	6	15	4.14365	2.03559	22	22	5	11	17	18	11	9	10	16	15	14	19	15	10	7	2	4	4	16	2.55183	1.59745	2	4	2	8	4	7	6	5	1	26	8
Indeterminables		2	0.330033	0.574485	3	0	1	1	3	1	3	4	3	2	0.552486	0.743294	2	1	0	1	2	1	2	1	1	1	2	0	2	1	1	1	0	2	4	4	0.637959	0.798723	2	2	0	3	1	1	3	1	2	1	1
Juglans cinerea		0	0	0	0	0	1	0	0	1	0	0	0	1	0.276243	0.525588	0	0	1	0	0	0	1	0	1	0	0	0	0	0	0	0	0	0	0	0	0	0	0	0	0	0	0	0	0	0	0	0	0
Koenigia islandica		0	0	0	0	0	0	0	0	0	0	1	1	0	0	0	0	0	0	0	0	0	1	0	0	0	0	0	0	0	0	0	0	0	0	0	0	0	0	0	0	0	0	0	0	0	0	0	0
Liguliflorae		0	0	0	0	0	0	0	0	0	0	0	0	0	0	0	0	0	0	0	0	0	0	0	0	0	0	0	0	0	0	0	0	0	0	0	0	0	0	0	0	0	0	1	0	0	0	0	0
Lycopodiella inundata		0	0	0	0	0	0	0	0	3	0	0	0	0	0	0	0	0	0	0	0	0	0	0	0	0	0	0	0	0	0	0	0	0	0	0	0	0	0	0	0	0	0	0	0	0	0	0	0
Lycopodium annotinum		7	1.15512	1.07476	8	4	2	9	22	69	23	27	12	17	4.69613	2.16706	15	5	7	8	7	9	6	1	12	23	9	8	14	15	17	12	17	32	59	47	7.49601	2.73788	19	22	15	23	14	25	19	13	15	33	38
Lycopodium clavatum		0	0	0	0	2	0	0	0	0	0	0	0	0	0	0	0	0	0	0	0	0	0	1	0	0	0	0	0	0	0	0	0	0	0	1	0.15949	0.399362	0	0	0	1	0	0	0	0	0	0	0
Monolete spores		30	4.9505	2.22497	4	2	1	25	82	126	111	82	5	4	1.10497	1.05118	11	28	5	11	5	57	7	6	2	25	5	2	28	3	4	11	2	4	3	28	4.46571	2.11322	28	22	12	41	18	24	51	14	13	54	55
Myrica gale		1	0.165017	0.406222	0	0	2	0	0	0	0	1	0	0	0	0	0	0	0	0	0	0	0	0	0	0	0	0	0	1	1	0	0	0	0	1	0.15949	0.399362	1	0	2	0	0	1	0	1	1	0	1
Osmunda cinnamomea		0	0	0	0	0	0	0	0	0	0	0	0	0	0	0	0	0	0	0	0	0	0	0	0	0	0	0	0	2	0	0	0	0	0	0	0	0	0	0	0	1	0	0	1	0	0	0	0
Papaveraceae		0	0	0	1	1	2	0	1	1	2	6	5	1	0.276243	0.525588	2	1	5	2	2	3	8	1	10	6	10	10	8	11	14	10	2	2	2	0	0	0	0	0	0	0	0	0	0	0	0	1	0
Picea (fragments de)		6	0.990099	0.995037	0	2	0	3	0	1	1	2	0	0	0	0	0	0	0	0	0	1	1	0	0	1	0	0	0	1	0	0	0	0	0	2	0.318979	0.564782	2	1	0	1	1	2	2	1	1	0	1
Picea type mariana		35	5.77558	2.40324	9	15	1	7	3	1	2	2	0	0	0	0	0	0	0	0	0	0	0	0	0	0	0	0	0	2	0	0	0	0	0	3	0.478469	0.691714	2	2	1	10	4	4	2	2	0	2	3
Pinus		2	0.330033	0.574485	1	0	0	2	2	0	0	0	1	0	0	0	0	0	0	0	0	0	0	0	0	0	0	0	0	1	0	0	0	0	0	1	0.15949	0.399362	0	0	1	0	0	0	3	1	0	0	2
Pinus (fragments de)		2	0.330033	0.574485	0	1	0	4	0	0	2	1	0	0	0	0	1	1	1	0	0	1	0	1	0	1	1	0	1	1	0	0	0	0	0	3	0.478469	0.691714	0	1	2	1	1	3	0	1	0	0	0
Pinus cf. P. banksiana		24	3.9604	1.99007	2	6	0	5	7	1	5	3	0	0	0	0	0	0	0	0	0	0	1	0	0	0	0	0	1	1	0	0	0	0	2	3	0.478469	0.691714	2	2	0	4	2	5	2	1	0	0	3
Pinus strobus		4	0.660066	0.812444	1	0	1	3	1	1	0	1	0	0	0	0	0	0	1	0	0	0	1	0	0	0	0	0	0	1	0	0	0	0	0	0	0	0	0	0	0	0	0	0	0	0	0	0	0
Plantago		0	0	0	0	0	0	0	0	1	0	0	0	1	0.276243	0.525588	0	1	0	0	0	0	0	0	0	0	0	0	0	0	0	0	0	0	0	0	0	0	0	0	0	0	0	0	0	0	0	0	0
Poaceae		55	9.07591	3.01262	65	59	73	44	85	131	90	56	85	113	31.2155	5.58708	70	31	39	43	48	41	68	82	133	87	108	120	104	54	100	81	136	113	112	35	5.58214	2.36265	24	22	11	29	13	37	28	33	6	45	29
Polygonum		0	0	0	0	3	0	0	0	1	0	0	0	0	0	0	0	0	0	0	0	0	0	0	0	0	0	0	0	0	0	0	0	0	0	0	0	0	0	0	0	0	0	0	0	0	0	0	0
Polygonum type viviparum		0	0	0	0	0	0	0	0	1	0	0	0	0	0	0	1	0	0	0	0	0	0	0	0	0	0	0	0	0	0	1	0	0	0	1	0.15949	0.399362	0	0	0	0	0	0	0	0	0	0	0
Populus cf. P. tremuloides		6	0.990099	0.995037	2	0	0	2	2	1	0	1	1	1	0.276243	0.525588	0	0	0	0	0	0	0	1	0	0	0	0	0	0	0	0	0	1	0	0	0	0	0	0	0	0	0	0	0	0	0	0	0
Potamogeton/Triglochin		0	0	0	0	0	0	0	0	0	0	0	0	0	0	0	0	0	0	0	0	0	0	0	0	0	0	0	0	0	0	0	0	0	0	0	0	0	0	0	0	0	1	0	0	0	0	0	0
Quercus		0	0	0	1	1	0	2	0	1	0	0	0	0	0	0	0	0	0	0	0	1	0	0	0	0	0	0	0	1	0	0	0	0	0	0	0	0	0	1	0	0	1	0	1	0	1	0	0
Ranunculaceae		0	0	0	0	1	0	0	1	2	0	0	2	0	0	0	0	1	0	1	0	0	0	3	0	0	1	0	1	1	1	1	0	3	1	0	0	0	0	0	1	0	0	0	0	0	0	0	2
Rosaceae		0	0	0	0	0	1	0	0	0	0	2	0	0	0	0	0	0	0	0	0	1	1	0	0	2	0	1	1	1	0	0	0	0	1	0	0	0	0	1	0	1	0	0	0	0	0	1	1
Salix		17	2.80528	1.6749	5	6	10	6	2	3	4	15	5	8	2.20994	1.48659	3	8	1	1	1	10	1	0	0	1	1	0	1	4	0	0	1	0	1	15	2.39234	1.54672	11	13	9	18	10	13	14	10	5	3	12
Salix type herbacea		2	0.330033	0.574485	10	6	8	8	22	13	20	8	25	11	3.03867	1.74318	4	11	2	2	0	5	3	5	3	7	4	1	1	4	1	3	0	1	3	15	2.39234	1.54672	3	12	2	19	6	13	9	4	2	1	5
Saxifraga type cernua		1	0.165017	0.406222	1	0	0	1	1	0	1	0	0	2	0.552486	0.743294	0	1	0	0	0	0	0	0	1	0	0	1	1	0	0	1	1	0	1	0	0	0	1	1	0	1	1	2	0	3	0	1	0
Saxifraga type oppositifolia		0	0	0	0	1	1	0	0	2	0	0	0	1	0.276243	0.525588	0	0	0	0	0	0	0	0	0	2	2	2	0	0	0	0	0	0	0	2	0.318979	0.564782	1	1	2	1	0	0	2	2	0	0	1
Saxifraga type stellaris		0	0	0	3	1	1	0	3	1	0	0	2	0	0	0	0	0	0	0	0	1	2	0	4	2	1	0	0	1	1	2	0	0	2	2	0.318979	0.564782	0	1	0	2	2	0	1	1	0	0	0
Sphagnum		6	0.990099	0.995037	0	0	0	0	0	0	0	2	0	0	0	0	0	1	0	0	0	2	0	0	0	1	0	1	0	0	0	0	0	0	0	3	0.478469	0.691714	0	3	2	1	3	3	9	1	2	4	2
Taxus canadensis		3	0.49505	0.703598	0	0	0	0	0	0	0	0	0	1	0.276243	0.525588	0	1	0	0	0	0	0	0	0	0	0	0	0	0	0	0	0	0	0	0	0	0	0	0	0	0	0	0	0	0	0	0	0
Thalictrum		0	0	0	0	0	0	0	0	0	0	0	1	1	0.276243	0.525588	0	0	0	0	1	0	0	0	0	0	0	0	0	0	0	0	1	0	0	0	0	0	0	0	0	0	0	0	0	0	1	0	0
Thuja occidentalis/Juniperus communis		0	0	0	0	0	0	0	0	0	0	0	0	0	0	0	0	0	0	0	0	0	0	0	0	0	0	0	0	0	0	0	0	0	0	0	0	0	0	0	1	0	0	0	0	1	0	0	0
Trilete spores		0	0	0	0	1	0	1	2	0	0	0	0	1	0.276243	0.525588	0	0	2	2	2	0	2	1	0	1	1	1	0	1	1	1	0	0	0	0	0	0	0	1	0	1	1	0	1	0	0	0	2
Tsuga canadensis		1	0.165017	0.406222	0	0	0	0	0	0	0	0	0	0	0	0	0	0	0	0	0	1	0	0	0	0	0	0	0	0	0	0	0	0	0	0	0	0	0	0	0	0	0	0	0	0	0	0	0
Tubuliflorae		0	0	0	0	3	3	2	1	0	1	0	0	0	0	0	2	0	0	0	0	1	0	0	1	0	0	0	0	0	0	1	0	0	0	2	0.318979	0.564782	2	0	0	0	0	0	0	0	0	0	0
type Ambrosia		10	1.65017	1.28459	3	7	4	4	5	2	3	2	5	1	0.276243	0.525588	3	2	0	1	0	2	3	1	1	1	1	2	0	2	0	2	3	0	1	2	0.318979	0.564782	2	2	3	3	3	1	4	0	2	2	4
type Campanula		0	0	0	0	0	0	1	0	1	0	0	1	0	0	0	0	0	0	0	0	0	0	0	0	0	0	0	0	0	0	1	0	1	0	0	0	0	0	0	0	0	0	0	0	0	0	0	0
type Dryopteris		0	0	0	0	0	0	0	0	0	0	0	0	0	0	0	0	0	0	0	0	0	0	0	0	0	0	0	0	1	0	0	0	0	0	0	0	0	0	0	0	0	0	0	0	0	0	0	0
type Oxyria digyna		18	2.9703	1.72345	12	9	13	10	10	2	15	16	17	18	4.97238	2.22988	12	19	14	13	10	19	46	32	35	42	45	28	35	15	7	6	1	0	0	3	0.478469	0.691714	4	0	1	0	4	2	4	1	2	25	8
type Potentilla palustris		0	0	0	0	0	0	0	0	0	0	0	0	0	0	0	0	0	0	0	0	0	0	0	1	0	0	0	0	0	0	0	0	0	0	1	0.15949	0.399362	1	0	0	0	0	0	1	0	0	1	0
type Veronica		0	0	0	0	0	0	0	0	1	0	0	0	0	0	0	0	0	0	0	0	0	0	0	0	0	0	0	0	0	0	0	0	0	0	0	0	0	0	0	0	0	0	0	0	0	0	0	0
type Woodsia		0	0	0	0	1	0	0	0	0	0	0	0	0	0	0	0	1	0	0	0	2	0	0	0	3	1	0	0	7	0	0	0	0	0	0	0	0	0	0	0	0	0	0	0	0	0	0	0
Ulmus		0	0	0	0	0	0	0	0	0	0	2	0	1	0.276243	0.525588	0	0	0	0	0	0	0	0	0	0	0	0	0	0	0	0	0	0	0	0	0	0	0	0	0	0	0	0	0	1	1	0	0
		606			515	500	548	548	686	744	618	613	348	362			502	377	224	235	198	389	269	225	288	370	303	253	291	242	204	212	264	233	335	627			638	553	579	760	633	723	730	593	637	662	728
[truncated: 9 more columns]

## Sheet: Amarok
		arctic/alpine shrub or herb	boreal evergreen conifer	boreal summergreen	cool-temperate conifer	desert forb	eurythermic conifer	grass	heath	sedge	steppe forb	temperate summergreen	cool-temperate summergreen	intermediate-temperate summergreen	warm-temperate summergreen	warm-temperate conifer	warm-temperate broadleaved evergreen	cool-temperate broadleaved evergreen	warm-temperate sclerophyll shrub			Biomes														MEGABIOMES									MEGASCORES
		aa	bec	bs	ctc	df	ec	g	h	s	sf	ts	ts1	ts2	ts3	wtc	wte	wte1	wte2			Desert	xerophytic woods/scrub	cold deciduous forest	tundra	broadleaved evergreen/warm mixed forest	steppe	open conifer woodland	temperate deciduous forest	taiga	cold mixed forest	cool conifer forest	cool mixed forest			desert	grassland and dry shrubland	boreal forest	tundra	warm-temperate forest	savanna and dry woodland	temperate forest		sqrt	desert	grassland and dry shrubland	boreal forest	tundra	warm-temperate forest
Acer rubrum	Acer											1										0	0	0	0	1	0	0	1	0	0	0	1			0	0	0	0	1	0	1		0	0	0	0	0	0
Alnus type crispa	Alnus	1		1		1																1	0	1	1	0	0	0	1	1	1	1	1			1	0	1	1	0	0	1		0	0	0	0	0	0
Alnus type incana	Alnus	1		1		1																1	0	1	1	0	0	0	1	1	1	1	1			1	0	1	1	0	0	1		0	0	0	0	0	0
Apiaceae	Apiaceae	1				1					1											1	0	0	1	0	1	1	0	0	0	0	0			1	1	0	1	0	1	0		0	0	0	0	0	0
Armeria maritima	Plumbaginaceae																																			0	0	0	0	0	0	0		0	0	0	0	0	0
Artemisia	Artemisia										1											0	0	0	0	0	1	1	0	0	0	0	0			0	1	0	0	0	1	0		0	0	0	0	0	0
Betula	Betula	1		1									1									0	0	1	1	0	0	0	2	1	2	2	2			0	0	1	1	0	0	1		0	0	0	0	0	0
Botrychium																																				0	0	0	0	0	0	0		0	0	0	0	0	0
Brassicaceae	Brassicaceae	1				1					1											1	0	0	1	0	1	1	0	0	0	0	0			1	1	0	1	0	1	0		0	0	0	0	0	0
Carya ovata	Carya											1										0	0	0	0	1	0	0	1	0	0	0	1			0	0	0	0	1	0	1		0	0	0	0	0	0
Caryophyllaceae	Caryophyllaceae	1				1					1											1	0	0	1	0	1	1	0	0	0	0	0			1	1	0	1	0	1	0		0	0	0	0	0	0
Castanea dentata	Castanea													1								0	0	0	0	0	0	0	1	0	0	0	0			0	0	0	0	0	0	1		0	0	0	0	0	0
cf. Callitriche																																				0	0	0	0	0	0	0		0	0	0	0	0	0
cf. Diapensia lapponica	Diapensia																																			0	0	0	0	0	0	0		0	0	0	0	0	0
Chenopodiaceae	Chenopodiaceae/Amaranthaceae					1					1											1	0	0	0	0	1	1	0	0	0	0	0			1	1	0	0	0	1	0		0	0	0	0	0	0
Cyperaceae	Cyperaceae									1												0	0	0	1	0	1	0	0	0	0	0	0			0	1	0	1	0	0	0		0	0	0	0	0	0
Dryas	Dryas																																			0	0	0	0	0	0	0		0	0	0	0	0	0
Epilobium type angustifolium	Epilobium angustifolium																																			0	0	0	0	0	0	0		0	0	0	0	0	0
Equisetum																																				0	0	0	0	0	0	0		0	0	0	0	0	0
Ericaceae	Ericaceae																																			0	0	0	0	0	0	0		0	0	0	0	0	0
Fabaceae	Fabaceae	1				1					1			1								1	0	0	1	0	1	1	1	0	0	0	0			1	1	0	1	0	1	1		0	0	0	0	0	0
Fraxinus type pennsylvanica	Fraxinus											1										0	0	0	0	1	0	0	1	0	0	0	1			0	0	0	0	1	0	1		0	0	0	0	0	0
Galium	Galium																																			0	0	0	0	0	0	0		0	0	0	0	0	0
Huperzia type selago																																				0	0	0	0	0	0	0		0	0	0	0	0	0
Indeterminables																																				0	0	0	0	0	0	0		0	0	0	0	0	0
Juglans cinerea	Juglans													1								0	0	0	0	0	0	0	1	0	0	0	0			0	0	0	0	0	0	1		0	0	0	0	0	0
Koenigia islandica	Koenigia islandica																																			0	0	0	0	0	0	0		0	0	0	0	0	0
Liguliflorae	Liguliflorae																																			0	0	0	0	0	0	0		0	0	0	0	0	0
Lycopodiella inundata																																				0	0	0	0	0	0	0		0	0	0	0	0	0
Lycopodium annotinum																																				0	0	0	0	0	0	0		0	0	0	0	0	0
Lycopodium clavatum																																				0	0	0	0	0	0	0		0	0	0	0	0	0
Monolete spores																																				0	0	0	0	0	0	0		0	0	0	0	0	0
Myrica gale	Myricaceae			1								1										0	0	1	0	1	0	0	2	1	1	1	2			0	0	1	0	1	0	1		0	0	0	0	0	0
Osmunda cinnamomea																																				0	0	0	0	0	0	0		0	0	0	0	0	0
Papaveraceae	Papaveraceae																																			0	0	0	0	0	0	0		0	0	0	0	0	0
Picea (fragments de)																																				0	0	0	0	0	0	0		0	0	0	0	0	0
Picea type mariana	Picea		1		1																	0	0	0	0	0	0	0	0	0	1	2	2			0	0	1	0	0	0	1		0	0	0	0	0	0
Pinus	Pinus undiff						1															0	1	1	0	1	0	1	1	1	1	1	1			0	1	1	0	1	1	1		0	0	0	0	0	0
Pinus (fragments de)																																				0	0	0	0	0	0	0		0	0	0	0	0	0
Pinus cf. P. banksiana	Pinus banksiana-type																																											0	0	0	0	0	0
Pinus strobus	Pinus strobus				1																	0	0	0	0	0	0	0	0	0	1	1	1			0	0	1	0	0	0	1		0	0	0	0	0	0
Plantago	Plantago undiff.																																			0	0	0	0	0	0	0		0	0	0	0	0	0
Poaceae	Poaceae							1														1	0	0	1	0	1	0	0	0	0	0	0			1	1	0	1	0	0	0		0	0	0	0	0	0
Polygonum	Polygonum																																			0	0	0	0	0	0	0		0	0	0	0	0	0
Polygonum type viviparum	Polygonum viviparum																																			0	0	0	0	0	0	0		0	0	0	0	0	0
Populus cf. P. tremuloides	Populus			1								1										0	0	1	0	1	0	0	2	1	1	1	2			0	0	1	0	1	0	1		0	0	0	0	0	0
Potamogeton/Triglochin																																				0	0	0	0	0	0	0		0	0	0	0	0	0
Quercus	Quercus											1					1		1			0	2	0	0	2	0	0	1	0	0	0	1			0	1	0	0	1	0	1		0	0	0	0	0	0
Ranunculaceae	Ranunculaceae	1				1					1											1	0	0	1	0	1	1	0	0	0	0	0			1	1	0	1	0	1	0		0	0	0	0	0	0
Rosaceae	Rosaceae undiff.																																			0	0	0	0	0	0	0		0	0	0	0	0	0
Salix	Salix	1		1								1										0	0	1	1	1	0	0	2	1	1	1	2			0	0	1	0	0	0	1		0	0	0	0	0	0
Salix type herbacea	Salix	1		1								1										0	0	1	1	1	0	0	2	1	1	1	2			0	0	1	0	0	0	1		0	0	0	0	0	0
Saxifraga type cernua	Saxifragaceae	1									1											0	0	0	1	0	1	1	0	0	0	0	0			0	0	0	0	1	0	1		0	0	0	0	0	0
Saxifraga type oppositifolia	Saxifragaceae	1									1											0	0	0	1	0	1	1	0	0	0	0	0			0	0	0	0	1	0	1		0	0	0	0	0	0
Saxifraga type stellaris	Saxifragaceae	1									1											0	0	0	1	0	1	1	0	0	0	0	0			0	0	0	0	1	0	1		0	0	0	0	0	0
Sphagnum	Sphagnum																																			0	0	0	0	0	0	0		0	0	0	0	0	0
Taxus canadensis	Taxus																																			0	0	0	0	0	0	0		0	0	0	0	0	0
Thalictrum	Thalictrum																																			0	0	0	0	0	0	0		0	0	0	0	0	0
Thuja occidentalis/Juniperus communis	Juniperis communis																																			0	0	0	0	0	0	0		0	0	0	0	0	0
Trilete spores																																				0	0	0	0	0	0	0		0	0	0	0	0	0
Tsuga canadensis	Tsuga				1																	0	0	0	0	0	0	0	0	0	1	1	1			0	0	1	0	0	0	1		0	0	0	0	0	0
Tubuliflorae	Asteraceae					1					1											1	0	0	0	0	1	1	0	0	0	0	0			1	1	0	0	0	1	0		0	0	0	0	0	0
type Ambrosia	Ambrosia					1					1											1	0	0	0	0	1	1	0	0	0	0	0			1	1	0	0	0	1	0		0	0	0	0	0	0
type Campanula	Campanula-type																																			0	0	0	0	0	0	0		0	0	0	0	0	0
type Dryopteris																																				0	0	0	0	0	0	0		0	0	0	0	0	0
type Oxyria digyna	Oxyria	1																				0	0	0	1	0	0	0	0	0	0	0	0			0	0	0	1	0	0	0		0	0	0	0	0	0
type Potentilla palustris	Potentilla-type																																			0	0	0	0	0	0	0		0	0	0	0	0	0
type Veronica																																				0	0	0	0	0	0	0		0	0	0	0	0	0
type Woodsia																																				0	0	0	0	0	0	0		0	0	0	0	0	0
Ulmus	Ulmus											1										0	0	0	0	1	0	0	1	0	0	0	1			0	0	0	0	1	0	1		0	0	0	0	0	0
																																													0	0	0	0	0
In Baffin Island thermophilous tree taxa (Acer rubrum, Carya ovata, Fraxinus type pennsylvanica, Juglans cinerea, Populus cf. tremuloides, Quercus and Ulmus) are not part of the local vegetation and pollen from these taxa is derived from remote sources.
The maximum count for such thermophilous taxa is 2, with maximum contribution to scores of 1.6 at Amarok and less at Brother-of-Fog.
Generally highest affinity scores are ~20 for tundra followed by second highest scores between 13-15 for boreal forest and temperate forest.
Scores of thermophilous tree taxa do not dominate affinity scores at these sites. In the Williams et al. (2000) scheme Salix is included in the temperate summergreen PFT.
In Baffin Island it only grows into herbs and prostrate shrubs and so does not readily fit within the temperate summergreen PFT. Affinity scores never exceeded 1.6 for this taxon and so did not heavily influence the biomization.
Pinus cf. banksiana, a boreal and cool-temperature conifer, is treated similarly to Pinus strobus (note that Pinus cf. banksiana only has a significant presence in Amorak near the top; further down its pollen represents less than 1 % of the total).
[truncated: 2 more columns]

## Sheet: BrotherofFog
		arctic/alpine shrub or herb	boreal evergreen conifer	boreal summergreen	cool-temperate conifer	desert forb	eurythermic conifer	grass	heath	sedge	steppe forb	temperate summergreen	cool-temperate summergreen	intermediate-temperate summergreen	warm-temperate summergreen	warm-temperate conifer	warm-temperate broadleaved evergreen	cool-temperate broadleaved evergreen	warm-temperate sclerophyll shrub			Biomes														MEGABIOMES									MEGASCORES
		aa	bec	bs	ctc	df	ec	g	h	s	sf	ts	ts1	ts2	ts3	wtc	wte	wte1	wte2			Desert	xerophytic woods/scrub	cold deciduous forest	tundra	broadleaved evergreen/warm mixed forest	steppe	open conifer woodland	temperate deciduous forest	taiga	cold mixed forest	cool conifer forest	cool mixed forest			desert	grassland and dry shrubland	boreal forest	tundra	warm-temperate forest	savanna and dry woodland	temperate forest		scores	desert	grassland and dry shrubland	boreal forest	tundra	warm-temperate forest
Alnus type crispa	Alnus	1		1		1																1	0	1	1	0	0	0	1	1	1	1	1			1	0	1	1	0	0	1		0	0	0	0	0	0
Alnus type incana	Alnus	1		1		1																1	0	1	1	0	0	0	1	1	1	1	1			1	0	1	1	0	0	1		0	0	0	0	0	0
Apiaceae	Apiaceae	1				1					1											1	0	0	1	0	1	1	0	0	0	0	0			1	1	0	1	0	1	0		0	0	0	0	0	0
Armeria maritima	Plumbaginaceae																																			0	0	0	0	0	0	0		0	0	0	0	0	0
Artemisia	Artemisia										1											0	0	0	0	0	1	1	0	0	0	0	0			0	1	0	0	0	1	0		0	0	0	0	0	0
Betula	Betula	1		1									1									0	0	1	1	0	0	0	2	1	2	2	2			0	0	1	1	0	0	1		0	0	0	0	0	0
Botrychium																																				0	0	0	0	0	0	0		0	0	0	0	0	0
Brassicaceae	Brassicaceae	1				1					1											1	0	0	1	0	1	1	0	0	0	0	0			1	1	0	1	0	1	0		0	0	0	0	0	0
Caryophyllaceae	Caryophyllaceae	1				1					1											1	0	0	1	0	1	1	0	0	0	0	0			1	1	0	1	0	1	0		0	0	0	0	0	0
cf. Callitriche																																				0	0	0	0	0	0	0		0	0	0	0	0	0
cf. Diapensia lapponica																																				0	0	0	0	0	0	0		0	0	0	0	0	0
Chenopodiaceae	Chenopodiaceae/Amaranthaceae					1					1											1	0	0	0	0	1	1	0	0	0	0	0			1	1	0	0	0	1	0		0	0	0	0	0	0
Cyperaceae	Cyperaceae									1												0	0	0	1	0	1	0	0	0	0	0	0			0	1	0	1	0	0	0		0	0	0	0	0	0
Dryas																																				0	0	0	0	0	0	0		0	0	0	0	0	0
Epilobium type angustifolium																																				0	0	0	0	0	0	0		0	0	0	0	0	0
Equisetum																																				0	0	0	0	0	0	0		0	0	0	0	0	0
Ericaceae																																				0	0	0	0	0	0	0		0	0	0	0	0	0
Fabaceae	Fabaceae	1				1					1			1								1	0	0	1	0	1	1	1	0	0	0	0			1	1	0	1	0	1	1		0	0	0	0	0	0
Fraxinus type pennsylvanica	Fraxinus											1										0	0	0	0	1	0	0	1	0	0	0	1			0	0	0	0	1	0	1		0	0	0	0	0	0
Huperzia type selago																																				0	0	0	0	0	0	0		0	0	0	0	0	0
Indeterminables																																				0	0	0	0	0	0	0		0	0	0	0	0	0
Juncaceae																																				0	0	0	0	0	0	0		0	0	0	0	0	0
Koenigia islandica																																				0	0	0	0	0	0	0		0	0	0	0	0	0
Liguliflorae	Asteraceae					1					1											1	0	0	0	0	1	1	0	0	0	0	0			1	1	0	0	0	1	0		0	0	0	0	0	0
Lycopodiella inundata																																				0	0	0	0	0	0	0		0	0	0	0	0	0
Lycopodium annotinum																																				0	0	0	0	0	0	0		0	0	0	0	0	0
Monolete spores																																				0	0	0	0	0	0	0		0	0	0	0	0	0
Myrica gale	Myricaceae			1								1										0	0	1	0	1	0	0	2	1	1	1	2			0	0	1	0	1	0	1		0	0	0	0	0	0
Nemopanthus / Ilex																																				0	0	0	0	0	0	0		0	0	0	0	0	0
Papaveraceae																																				0	0	0	0	0	0	0		0	0	0	0	0	0
Picea (fragments de)																																				0	0	0	0	0	0	0		0	0	0	0	0	0
Picea type mariana	Picea		1		1																	0	0	0	0	0	0	0	0	0	1	2	2			0	0	1	0	0	0	1		0	0	0	0	0	0
Pinus																																				0	0	0	0	0	0	0		0	0	0	0	0	0
Pinus (fragments de)																																				0	0	0	0	0	0	0		0	0	0	0	0	0
Pinus cf. P. banksiana																																				0	0	0	0	0	0	0		0	0	0	0	0	0
Pinus strobus	Pinus strobus				1																	0	0	0	0	0	0	0	0	0	1	1	1			0	0	1	0	0	0	1		0	0	0	0	0	0
Poaceae	Poaceae							1														1	0	0	1	0	1	0	0	0	0	0	0			1	1	0	1	0	0	0		0	0	0	0	0	0
Polygonum type viviparum																																				0	0	0	0	0	0	0		0	0	0	0	0	0
Ranunculaceae	Ranunculaceae	1				1					1											1	0	0	1	0	1	1	0	0	0	0	0			1	1	0	1	0	1	0		0	0	0	0	0	0
Rosaceae																																				0	0	0	0	0	0	0		0	0	0	0	0	0
Rubus chamaemorus																																				0	0	0	0	0	0	0		0	0	0	0	0	0
Salix	Salix	1		1								1										0	0	1	1	1	0	0	2	1	1	1	2			0	0	1	1	1	0	1		0	0	0	0	0	0
Salix type herbacea	Salix	1		1								1										0	0	1	1	1	0	0	2	1	1	1	2			0	0	1	1	1	0	1		0	0	0	0	0	0
Saxifraga type cernua	Saxifragaceae	1									1											0	0	0	1	0	1	1	0	0	0	0	0			0	1	0	1	0	1	0		0	0	0	0	0	0
Saxifraga type oppositifolia	Saxifragaceae	1									1											0	0	0	1	0	1	1	0	0	0	0	0			0	1	0	1	0	1	0		0	0	0	0	0	0
Saxifraga type stellaris	Saxifragaceae	1									1											0	0	0	1	0	1	1	0	0	0	0	0			0	1	0	1	0	1	0		0	0	0	0	0	0
Sphagnum																																				0	0	0	0	0	0	0		0	0	0	0	0	0
Thalictrum																																				0	0	0	0	0	0	0		0	0	0	0	0	0
Trilete spores																																				0	0	0	0	0	0	0		0	0	0	0	0	0
Tubuliflorae	Asteraceae					1					1											1	0	0	0	0	1	1	0	0	0	0	0			1	1	0	0	0	1	0		0	0	0	0	0	0
type Ambrosia	Ambrosia					1					1											1	0	0	0	0	1	1	0	0	0	0	0			1	1	0	0	0	1	0		0	0	0	0	0	0
type Campanula																																				0	0	0	0	0	0	0		0	0	0	0	0	0
type Oxyria digyna	Oxyria	1																				0	0	0	1	0	0	0	0	0	0	0	0			0	0	0	1	0	0	0		0	0	0	0	0	0
type Potentilla palustris																																				0	0	0	0	0	0	0		0	0	0	0	0	0
type Veronica																																				0	0	0	0	0	0	0		0	0	0	0	0	0
type Woodsia																																				0	0	0	0	0	0	0		0	0	0	0	0	0
																																													0	0	0	0	0
In Baffin Island thermophilous tree taxa (Acer rubrum, Carya ovata, Fraxinus type pennsylvanica, Juglans cinerea, Populus cf. tremuloides, Quercus and Ulmus) are not part of the local vegetation and pollen from these taxa is derived from remote sources.
The maximum count for such thermophilous taxa is 2, with maximum contribution to scores of 1.6 at Amarok and less at Brother-of-Fog.
Generally highest affinity scores are ~20 for tundra followed by second highest scores between 13-15 for boreal forest and temperate forest.
Scores of thermophilous tree taxa do not dominate affinity scores at these sites. In the Williams et al. (2000) scheme Salix is included in the temperate summergreen PFT.
In Baffin Island it only grows into herbs and prostrate shrubs and so does not readily fit within the temperate summergreen PFT. Affinity scores never exceeded 1.6 for this taxon and so did not heavily influence the biomization.
Pinus cf. banksiana, a boreal and cool-temperature conifer, is treated similarly to Pinus strobus (note that Pinus cf. banksiana only has a significant presence in Amorak near the top; further down its pollen represents less than 1 % of the total).
[truncated: 2 more columns]

## Sheet: Lake Tulane
		arctic/alpine shrub or herb	boreal evergreen conifer	boreal summergreen	cool-temperate conifer	desert forb	eurythermic conifer	grass	heath	sedge	steppe forb	temperate summergreen	cool-temperate summergreen	intermediate-temperate summergreen	warm-temperate summergreen	warm-temperate conifer	warm-temperate broadleaved evergreen	cool-temperate broadleaved evergreen	warm-temperate sclerophyll shrub			Biomes														MEGABIOMES									MEGASCORES
		aa	bec	bs	ctc	df	ec	g	h	s	sf	ts	ts1	ts2	ts3	wtc	wte	wte1	wte2			Desert	xerophytic woods/scrub	cold deciduous forest	tundra	broadleaved evergreen/warm mixed forest	steppe	open conifer woodland	temperate deciduous forest	taiga	cold mixed forest	cool conifer forest	cool mixed forest			desert	grassland and dry shrubland	boreal forest	tundra	warm-temperate forest	savanna and dry woodland	temperate forest		sqrt	desert	grassland and dry shrubland	boreal forest	tundra	warm-temperate forest
Acer saccharum-type	Acer											1										0	0	0	0	1	0	0	1	0	0	0	1			0	0	0	0	1	0	1		0	0	0	0	0	0
Acer undiff.	Acer											1										0	0	0	0	1	0	0	1	0	0	0	1			0	0	0	0	1	0	1		0	0	0	0	0	0
Alnus	Alnus	1		1		1																1	0	1	1	0	0	0	1	1	1	1	1			1	0	1	1	0	0	1		0	0	0	0	0	0
Ambrosia-type	Ambrosia					1					1											1	0	0	0	0	1	1	0	0	0	0	0			1	1	0	0	0	1	0		0	0	0	0	0	0
Anacardiaceae undiff.																																				0	0	0	0	0	0	0		0	0	0	0	0	0
Apiaceae undiff.	Apiaceae	1				1					1											1	0	0	1	0	1	1	0	0	0	0	0			1	1	0	1	0	1	0		0	0	0	0	0	0
Arecaceae undiff.																																				0	0	0	0	0	0	0		0	0	0	0	0	0
Artemisia	Artemisia										1											0	0	0	0	0	1	1	0	0	0	0	0			0	1	0	0	0	1	0		0	0	0	0	0	0
Asteraceae subf. Asteroideae undiff.	Asteraceae					1					1											1	0	0	0	0	1	1	0	0	0	0	0			1	1	0	0	0	1	0		0	0	0	0	0	0
Azolla																																				0	0	0	0	0	0	0		0	0	0	0	0	0
Berlandiera-type																																				0	0	0	0	0	0	0		0	0	0	0	0	0
Brasenia schreberi																																				0	0	0	0	0	0	0		0	0	0	0	0	0
Carya	Carya											1										0	0	0	0	1	0	0	1	0	0	0	1			0	0	0	0	1	0	1		0	0	0	0	0	0
Celtis	Celtis													1	1							0	0	0	0	1	0	0	1	0	0	0	0			0	0	0	0	1	0	1		0	0	0	0	0	0
Ceratiola ericoides																																				0	0	0	0	0	0	0		0	0	0	0	0	0
Chamaecrista fasciculata-type																																				0	0	0	0	0	0	0		0	0	0	0	0	0
Chenopodiaceae/Amaranthaceae undiff.	Chenopodiaceae/Amaranthaceae					1					1											1	0	0	0	0	1	1	0	0	0	0	0			1	1	0	0	0	1	0		0	0	0	0	0	0
Citrus																																				0	0	0	0	0	0	0		0	0	0	0	0	0
Cladium jamaicense																																				0	0	0	0	0	0	0		0	0	0	0	0	0
Cladium mariscoides																																				0	0	0	0	0	0	0		0	0	0	0	0	0
Combretaceae/Melastomataceae undiff.																																				0	0	0	0	0	0	0		0	0	0	0	0	0
Cupressaceae undiff.	Cupressaceae/Taxaceae						1															0	1	1	0	1	0	1	1	1	1	1	1			0	1	1	0	1	1	1		0	0	0	0	0	0
Cyperaceae undiff.	Cyperaceae									1												0	0	0	1	0	1	0	0	0	0	0	0			0	1	0	1	0	0	0		0	0	0	0	0	0
Cyrilla racemiflora																																				0	0	0	0	0	0	0		0	0	0	0	0	0
Dodonaea																																				0	0	0	0	0	0	0		0	0	0	0	0	0
Dryopteris-type																																				0	0	0	0	0	0	0		0	0	0	0	0	0
Equisetum																																				0	0	0	0	0	0	0		0	0	0	0	0	0
Ericaceae																																				0	0	0	0	0	0	0		0	0	0	0	0	0
Eriocaulon																																				0	0	0	0	0	0	0		0	0	0	0	0	0
Eugenia																																				0	0	0	0	0	0	0		0	0	0	0	0	0
Fagus	Fagus												1									0	0	0	0	0	0	0	1	0	1	1	1			0	0	1	0	0	0	1		0	0	0	0	0	0
Fraxinus	Fraxinus											1										0	0	0	0	1	0	0	1	0	0	0	1			0	0	0	0	1	0	1		0	0	0	0	0	0
Gomphrena-type																																				0	0	0	0	0	0	0		0	0	0	0	0	0
Hydrocotyle																																				0	0	0	0	0	0	0		0	0	0	0	0	0
Ilex																																				0	0	0	0	0	0	0		0	0	0	0	0	0
Indeterminable																																				0	0	0	0	0	0	0		0	0	0	0	0	0
Iso‰tes																																				0	0	0	0	0	0	0		0	0	0	0	0	0
Itea																																				0	0	0	0	0	0	0		0	0	0	0	0	0
Iva frutescens-type																																				0	0	0	0	0	0	0		0	0	0	0	0	0
Lechea																																				0	0	0	0	0	0	0		0	0	0	0	0	0
Liquidambar	Liquidambar														1							0	0	0	0	1	0	0	0	0	0	0	0			0	0	0	0	1	0	0		0	0	0	0	0	0
Myrica	Myricaceae			1								1										0	0	1	0	1	0	0	2	1	1	1	2			0	0	1	0	1	0	1		0	0	0	0	0	0
Myriophyllum																																				0	0	0	0	0	0	0		0	0	0	0	0	0
Nymphaea																																				0	0	0	0	0	0	0		0	0	0	0	0	0
Nyssa	Nyssa													1	1							0	0	0	0	1	0	0	1	0	0	0	0			0	0	0	0	1	0	1		0	0	0	0	0	0
Osmanthus																																				0	0	0	0	0	0	0		0	0	0	0	0	0
Osmunda cinnamomea																																				0	0	0	0	0	0	0		0	0	0	0	0	0
Osmunda undiff.																																				0	0	0	0	0	0	0		0	0	0	0	0	0
Ostrya/Carpinus	Ostrya/Carpinus											1										0	0	0	0	1	0	0	1	0	0	0	1			0	0	0	0	1	0	1		0	0	0	0	0	0
Pinus clausa-type																																				0	0	0	0	0	0	0		0	0	0	0	0	0
Pinus subg. Strobus	Pinus strobus				1																	0	0	0	0	0	0	0	0	0	1	1	1			0	0	1	0	0	0	1		0	0	0	0	0	0
Pinus undiff.	Pinus undiff						1															0	1	1	0	1	0	1	1	1	1	1	1			0	1	1	0	1	1	1		0	0	0	0	0	0
Piperaceae-type																																				0	0	0	0	0	0	0		0	0	0	0	0	0
Platanus	Platanus													1								0	0	0	0	0	0	0	1	0	0	0	0			0	0	0	0	0	0	1		0	0	0	0	0	0
Poaceae undiff.	Poaceae							1														1	0	0	1	0	1	0	0	0	0	0	0			1	1	0	1	0	0	0		0	0	0	0	0	0
Polygonella fimbriata-type																																				0	0	0	0	0	0	0		0	0	0	0	0	0
Polygonella polygama-type																																				0	0	0	0	0	0	0		0	0	0	0	0	0
Polypodium-type																																				0	0	0	0	0	0	0		0	0	0	0	0	0
Pseudolycopodiella carolinianum																																				0	0	0	0	0	0	0		0	0	0	0	0	0
Quercus	Quercus											1					1		1			0	2	0	0	2	0	0	1	0	0	0	1			0	1	0	0	1	0	1		0	0	0	0	0	0
Rhexia-type																																				0	0	0	0	0	0	0		0	0	0	0	0	0
Rhus																																				0	0	0	0	0	0	0		0	0	0	0	0	0
Rhynchospora-type																																				0	0	0	0	0	0	0		0	0	0	0	0	0
Rumex																																				0	0	0	0	0	0	0		0	0	0	0	0	0
Sabal																																				0	0	0	0	0	0	0		0	0	0	0	0	0
Selaginella																																				0	0	0	0	0	0	0		0	0	0	0	0	0
Serenoa																																				0	0	0	0	0	0	0		0	0	0	0	0	0
Sparganium-type																																				0	0	0	0	0	0	0		0	0	0	0	0	0
Taxodium	Taxodium															1						0	0	0	0	1	0	0	0	0	0	0	0			0	0	0	0	1	0	0		0	0	0	0	0	0
Thalictrum																																				0	0	0	0	0	0	0		0	0	0	0	0	0
Typha latifolia																																				0	0	0	0	0	0	0		0	0	0	0	0	0
Ulmus	Ulmus											1										0	0	0	0	1	0	0	1	0	0	0	1			0	0	0	0	1	0	1		0	0	0	0	0	0
Unknown																																				0	0	0	0	0	0	0		0	0	0	0	0	0
Urticaceae																																				0	0	0	0	0	0	0		0	0	0	0	0	0
Vitis																																				0	0	0	0	0	0	0		0	0	0	0	0	0
																																													0	0	0	0	0
[truncated: 2 more columns]
