# Supplementary material for: Terrestrial biosphere changes over the last 120 kyr
Source: Copernicus journal article supplement (doi:10.5194/cp-12-51-2016), 2016-01-18
Supplement: Supplementary file 1 [file cp-12-51-2016-supplement.zip › supplement/North_America/NorthAmerica_scores_ThompsonandAnderson2000.xls]

## Sheet: Bear Lake
Depth (m)	Age (Ka)	boreal forest	temperate forest	warm-temperate forest	grassland and dry shrubland	desert	tundra	savanna and dry woodland
0.2	-0.105802	8.01419	8.81741	6.54556	23.4576	8.97965	3.97391	19.2485
0.4	0.0737021	7.05024	8.85644	7.10036	24.1796	9.22349	4.64952	18.8402
0.5	0.163725
0.6	0.253996
0.8	0.435478	8.33346	10.0957	6.62051	24.1151	8.58742	4.23251	18.6776
1	0.61855
1.2	0.80361
1.4	0.991059	8.04846	9.76065	7.57565	24.0446	9.07214	5.72753	18.5535
1.5	1.0858
1.6	1.1813
1.72	1.29694
2.15	1.72208	8.04984	8.8492	6.5056	24.7601	10.4119	6.74654	18.5788
2.2	1.77273
2.4	1.97812
2.6	2.18829
2.9	2.5134
3.2	2.85152	6.16849	8.54396	6.86165	25.4813	9.93643	6.02522	18.763
3.4	3.08484
3.7	3.44766
3.8	3.57223	6.67881	7.92881	5.4333	23.573	9.04895	3.79899	18.524
3.96	3.77551
4	3.82712
4.2	4.09012
4.4	4.36175
4.6	4.64253	7.6077	9.16444	7.21901	24.7939	10.599	5.06637	19.8802
4.97	5.18786
5.2	5.54496	5.35866	7.28913	6.73185	24.5015	8.78117	4.81809	18.3102
5.5	6.03315
5.6	6.20179	8.92529	10.1994	6.54264	25.2298	9.8852	4.50086	20.0246
5.9	6.72629
6.2	7.27978	5.65622	7.37374	5.51939	24.2756	8.98685	3.87523	18.6829
6.4	7.66542
6.6	8.06457	4.41054	5.76099	5.20967	21.4223	7.12936	4.73856	16.4359
6.9	8.68875
7.2	9.34316	4.19612	6.71628	5.96464	24.4186	9.36775	4.06367	18.8978
7.4	9.79586
7.6	10.2615	7.81334	8.92963	5.77595	22.8531	8.5338	4.52356	18.3295
7.8	10.7397
8.02	11.2797	5.04443	6.36703	5.06348	23.0975	8.44414	3.61248	18.1624
8.3	11.9866	5.11728	7.1427	6.03159	23.804	8.25892	3.43953	18.3391
8.6	12.7663	6.41244	7.46216	5.28594	22.4119	8.6616	4.10886	17.7782
8.8	13.2975	8.64777	9.61601	7.14839	23.2657	8.44652	4.61262	18.8028
9	13.8369	10.1307	10.9238	7.5255	24.1337	9.07069	6.795	18.6384
9.3	14.6591	9.78034	11.1627	8.02471	23.8355	7.55854	5.14552	18.4363
9.5	15.2145
9.7	15.7747	9.61324	10.8188	8.7547	23.2172	7.01267	6.04434	17.9794
10	16.6218	9.8517	10.3997	6.43435	21.9275	7.74016	6.06082	18.2857
10.3	17.4739	9.32496	10.8428	7.35504	23.8893	9.07339	7.69554	18.3206
10.6	18.3275	7.57152	8.33291	5.65816	22.668	9.01202	6.91104	17.2278
11.5	20.8625	8.77264	10.4678	7.53873	24.4593	10.2822	6.24873	18.3456
12.1	22.5018	5.31214	5.31214	3.75671	23.7014	10.7905	3.90211	19.7993
12.5	23.5635	8.81457	10.1947	5.79209	24.3098	8.79633	5.39196	18.6811
12.7	24.0844	5.80411	5.80411	5.80411	24.8471	10.9659	6.43436	20.2578
13.2	25.3571	6.74315	7.35514	5.3747	24.7723	10.908	5.72727	19.045
13.8	26.8292	8.64026	9.43331	7.05416	24.0927	11.526	5.35454	19.0667
14.1	27.5428	6.82985	7.38626	5.17834	24.7335	11.5409	5.66058	19.073
14.4	28.2417	5.62813	6.73754	5.77677	24.8229	10.9247	6.36819	18.6844
14.7	28.9265	8.1576	8.75522	6.57376	25.0069	10.5906	6.58696	19.0176
15.7	31.1132	8.12131	8.12131	5.2048	25.3665	12.5973	5.55318	20.9661
16	31.7425	7.08178	8.47525	6.22057	24.5164	9.56954	3.59673	19.5263
16.7	33.1672	7.23661	7.23661	5.79822	24.8945	11.6525	6.19333	19.2884
17	33.76	6.07067	6.78678	4.63844	23.2041	9.99153	5.64899	17.5551
17.6	34.9158	6.80501	6.80501	4.98432	21.9439	9.97524	4.50312	17.9663
17.9	35.4797	6.38958	6.96031	4.99159	25.1611	10.7649	6.12441	19.8438
18.2	36.0347	4.05274	4.74281	3.36268	23.6555	10.2451	5.53749	17.4279
18.4	36.4001
19	37.4749	8.38796	9.12718	6.27105	20.8765	6.74399	4.7676	16.1089
19.3	38.0011	6.55028	7.99668	6.28528	23.8826	9.42875	4.68062	18.4025
19.6	38.5204
20	39.2029	5.51939	5.51939	3.66642	22.7174	9.33741	4.06489	18.6525
20.09	39.3549
21	40.8649	4.46217	5.8034	4.00558	21.7409	8.41993	5	17.0663
21.4	41.5147	3.95385	3.95385	3.24851	19.3726	7.02623	4.6888	16.0945
21.7	41.9974	8.52627	8.52627	5.27327	23.2844	10.0532	5.32054	18.7723
22	42.4764	6.30044	6.87025	4.26255	23.4314	9.82825	5.40474	18.0266
22.3	42.9522
22.6	43.4253	5.69381	6.24766	4.33716	22.7441	8.90681	4.62957	18.1145
23	44.0525
23.3	44.5207	8.22646	9.00972	5.8357	23.8265	9.90603	6.03192	18.3484
23.7	45.143
24.1	45.7637	6.79281	7.57487	4.45026	21.6357	6.70439	4.66821	16.7384
24.4	46.2288	6.94497	7.4889	5.28057	21.7667	6.88442	6.42528	16.1106
24.8	46.8493
25.1	47.3154	6.02766	6.02766	4.03874	22.5772	8.81725	5.80773	17.8605
25.4	47.7825
25.7	48.2512	7.11085	7.64845	3.57875	20.7556	8.39098	4.45754	16.8356
26	48.7217
26.1	48.8791	5.43212	6.0308	4.33747	23.8553	10.1994	4.6809	19.1744
26.3	49.1946
26.6	49.6703	3.34284	3.89166	2.94108	20.8867	7.58841	4.29983	16.038
27	50.3091	5.29044	5.82044	4.01091	19.3084	6.19164	3.69658	15.6118
27.4	50.9533
27.7	51.44	4.90615	5.76841	3.65631	18.8252	6.69856	2.8598	15.1032
28	51.9296
28.3	52.4224	5.36501	5.87532	3.6227	19.8557	7.60395	4.50659	15.8595
28.9	53.4169	4.76321	5.30474	3.68015	20.633	7.48478	4.91859	15.7144
29.09	53.7343
29.1	53.7511	5.97621	6.77557	5.17685	21.5453	7.00805	5.22425	17.2174
29.9	55.1014
30.2	55.6133	8.25475	9.01835	6.72754	19.7312	5.09723	2.83076	16.6768
30.4	55.9563
30.8	56.6464	7.98255	9.43668	6.06351	21.7829	6.84952	4.03049	17.3628
31.2	57.3419	5.33199	6.10581	4.46428	20.7464	7.86751	4.27817	16.2416
31.5	57.867
31.8	58.3953	7.70323	8.23776	6.19138	20.8477	6.05956	4.59986	17.3169
32.09	58.9088
32.2	59.1043
32.5	59.6397	6.40486	7.48162	4.97799	21.5653	7.71845	4.54905	17.0163
32.8	60.1781	5.69727	5.69727	4.39539	20.1474	7.29104	3.58855	17.3105
33.2	60.9008
33.6	61.629	3.31743	4.40529	4.40529	22.684	8.59883	3.45879	18.1374
34	62.3627	3.83023	4.60405	3.5097	22.3989	8.83258	4.51017	17.6621
34.3	62.9165
34.5	63.2874	2.69191	2.69191	2.69191	21.8527	7.79602	4.90844	16.9442
34.6	63.4734	2.90627	2.90627	2.90627	22.8538	10.405	4.35538	18.4984
35.09	64.3897
35.2	64.5965	3.59266	4.3619	3.41978	22.538	11.0647	3.96605	18.3466
35.5	65.1627	3.19606	3.19606	3.19606	21.8155	8.47588	5.12226	17.2549
36.1	66.3043	3.47415	4.22054	3.69276	22.7234	10.1489	3.89774	18.607
36.5	67.0723
36.8	67.652	3.73116	3.73116	2.94427	23.033	9.29521	4.67662	18.9128
37.1	68.2347	3.52318	4.27166	3.52318	24.5509	9.82307	3.85583	19.9466
37.5	69.0165
37.9	69.8039	3.62839	3.62839	3.62839	22.9667	11.4537	5.68398	17.8251
38.08	70.1599
38.2	70.3979	5.7836	5.7836	4.42487	21.7815	8.33818	4.83367	17.9086
38.5	70.9949
38.7	71.3946	6.54786	7.90243	6.16254	22.9612	7.27178	3.65554	18.7331
39	71.9963
39.3	72.6008	3.00753	3.71641	2.7139	21.6934	9.6334	4.62794	16.3566
39.6	73.208	4.65842	5.21398	3.54731	24.4389	10.8755	3.96392	19.9194
40	74.0215	4.8251	5.36743	3.41205	21.8554	8.44456	4.30458	17.0085
40.6	75.25	7.38617	8.50072	5.49234	22.8011	7.10832	4.33603	17.9078
41	76.0742
41.08	76.2395	4.53277	6.43634	4.42798	23.0418	8.05892	4.28972	18.025
41.5	77.1099
41.8	77.7341	6.27508	8.71408	7.62136	25.5312	8.9947	4.16032	19.4783
42.6	79.4084	9.81869	11.2954	8.58075	25.6909	10.2811	4.89667	20.6649
42.8	79.8291
43.1	80.4619	8.49562	10.0056	8.02856	25.3206	10.5703	5.80106	19.8565
43.5	81.3086	6.06443	6.06443	4.7057	24.6404	11.36	4.74186	20.4532
43.8	81.9459
43.9	82.1587
44.2	82.7985	6.68633	7.23268	5.23832	23.6825	9.36905	5.76684	18.862
44.9	84.2986	7.51205	8.06005	5.32006	23.2712	8.88136	4.93452	18.8847
45.2	84.9446
45.4	85.3762	5.85294	5.85294	4.1914	23.6736	9.95503	6.30624	18.7045
45.8	86.2419	5.89568	7.02434	5.19813	26.955	11.9823	4.60186	21.2244
46.4	87.5464	6.51105	7.05987	4.93939	21.0866	6.54314	3.53962	17.5469
46.7	88.2013	4.94045	5.736	4.61092	19.9151	5.9919	3.2066	15.9129
47	88.8579
47.1	89.0772
47.2	89.2966	5.47547	6.01076	4.71846	22.0711	8.01767	4.12695	18.336
47.6	90.1762	6.7885	7.35555	5.08736	24.2438	9.72893	5.92343	18.5553
48.3	91.7228	5.47546	6.61322	4.35583	24.0091	10.4169	4.71687	19.2923
48.6	92.3883	5.85959	6.63691	4.7409	24.833	10.3913	4.34167	19.714
49.3	93.9476	4.0504	4.83366	4.27981	25.1359	12.0306	5.41652	19.7193
49.5	94.3947	5.71476	6.51032	4.82268	23.0281	9.16576	5.66542	17.3627
49.8	95.0666
50.09	95.7177	3.7637	5.10001	4.00892	22.6	7.6287	4.35579	16.9079
50.2	95.965
50.5	96.6405	5.56012	6.3204	5.02251	24.6414	10.1976	6.02431	18.3944
50.8	97.3176	5.8116	6.61353	4.42262	22.6491	8.17849	5.9204	16.4939
51.2	98.2227	4.63274	5.4321	3.7364	23.1646	9.10846	5.51419	17.4162
51.5	98.9032
52.2	100.497	4.98021	4.98021	3.67284	22.7313	9.00967	3.97942	18.7518
52.5	101.182
52.8	101.869	6.48421	6.48421	3.7514	23.3438	9.96444	5.35433	19.2395
52.99	102.305
53.2	102.787	5.24856	6.49856	4.97129	24.1026	9.47124	4.23181	19.1798
53.6	103.707	6.60604	8.61907	6.18173	25.7952	10.7466	4.03106	20.3032
53.8	104.168
54	104.63	7.80112	10.1099	7.6337	26.0432	9.42475	3.66755	20.6216
54.4	105.555	6.7041	7.69587	5.40547	26.6387	11.7561	6.11279	21.2519
55.2	107.411	7.8666	8.42302	6.5233	24.2064	8.06577	5.02546	18.6245
55.5	108.109	5.22396	6.79531	5.6842	24.5408	9.38842	3.15864	20.3663
55.6	108.341
55.7	108.574	6.90822	8.07069	6.51107	25.0883	9.74175	3.80373	20.642
56.1	109.507	4.61205	5.93503	5.38703	26.2645	11.559	4.04828	21.9892
56.3	109.974	5.71475	7.259	6.12853	25.6838	10.1431	3.41891	21.8511
56.9	111.376	5.67853	5.67853	4.17523	21.8546	7.85587	4.05337	18.3327
57.2	112.078
57.4	112.547	3.00322	3.77938	3.23055	25.9677	13.037	4.87594	20.3156
57.7	113.249
57.9	113.718	5.29198	6.06235	4.5216	22.8991	9.71088	4.89543	18.5484
58.2	114.421	4.29503	5.10348	3.72337	24.4802	10.6602	5.20156	19.0418
58.6	115.359	5.09916	5.09916	4.55763	23.2676	9.21184	4.2901	19.5191
58.8	115.828	3.18447	3.18447	3.18447	21.6768	9.82031	3.76349	18.444
59.2	116.766	3.69256	4.47702	3.92232	22.0077	8.13052	2.97258	18.2506
59.4	117.235
59.6	117.703	4.42269	5.51704	4.96987	23.6804	9.20205	4.35795	18.7753
59.8	118.172
60	118.641	2.9109	4.07998	3.60271	20.322	7.78284	2.90705	16.2459
60.2	119.109
60.4	119.577	2.85255	2.85255	2.33126	21.2676	9.30533	4.72651	17.0624
60.6	120.045
60.7	120.279	3.62087	4.60146	4.11117	20.4952	7.83758	4.41606	15.5889
60.9	120.747
60.95	120.864	4.17716	4.94867	3.85758	24.168	9.90615	4.82767	18.5688
61.1	121.214	5.62258	6.3618	4.88336	24.4979	10.8654	5.23993	19.5641
61.7	122.615	5.57061	6.11616	5.02507	22.9514	8.68469	4.57448	18.3769
61.9	123.081	4.62738	5.19082	4.21492	21.8384	7.02256	3.58299	17.692
62	123.314	6.14563	6.69037	4.65739	21.808	7.38677	4.3833	16.88
62.4	124.245	6.59228	7.66905	5.60789	23.0779	8.42082	4.43415	18.1053
62.6	124.71	6.09046	7.18811	4.73811	22.7524	7.38844	5.38587	16.8177
62.8	125.174	7.49208	9.02501	6.43949	21.5291	7.15257	4.69901	16.3191
63	125.638	5.55013	5.55013	3.76603	19.0322	7.54777	4.41054	14.6217
63.1	125.87
63.25	126.217	6.66542	8.57632	5.61714	21.8251	7.56519	4.89396	16.5927
63.4	126.564
63.6	127.026	6.27927	8.19992	5.29591	20.0229	8.46894	5.85665	14.7288
63.8	127.488
64.1	128.179	4.97296	7.04011	4.65666	20.5821	8.51267	5.08341	13.9715
64.4	128.869
64.6	129.329	5.88657	7.66268	5.97771	23.8835	8.3871	4.20046	18.4686
64.8	129.787
65	130.245
65.2	130.702	4.65505	6.92325	5.37404	24.658	9.3321	5.37375	18.1502
65.4	131.159
65.6	131.615	3.57382	5.6019	4.72372	22.8176	9.73776	5.31216	16.4914
65.7	131.843
65.9	132.297	3.71228	5.7385	4.25901	24.5616	9.9717	4.29826	18.2372
66	132.524
66.2	132.978	4.34029	7.40875	6.45673	26.9503	10.2574	4.36215	20.0694
66.41	133.453
66.5	133.657	4.0527	6.77622	5.34424	26.4835	11.0544	4.0527	20.2315
66.7	134.108
66.9	134.559	4.09744	6.72141	5.33904	24.7389	9.2266	4.98922	17.6984
67.1	135.009
67.25	135.346	4.78852	7.18278	6.3847	25.2968	9.65605	3.5505	19.352
67.4	135.682
67.6	136.13
67.75	136.465	7.41659	9.73114	8.24068	23.0445	7.20449	2.53447	18.967
67.9	136.799
68.1	137.245
68.2	137.467	8.61097	9.25446	5.89239	18.6521	6.58827	4.69267	14.4144
68.35	137.799
68.5	138.131
68.7	138.573	9.36609	10.4807	5.77708	21.7268	7.86651	6.07236	16.0624
68.9	139.014
69.1	139.453	9.73379	10.354	7.15643	23.2568	9.0986	7.43415	16.4429
69.3	139.891
69.5	140.327	9.68546	10.4861	6.58632	23.4772	8.97995	6.92021	16.3225
69.9	141.196
70.2	141.844	9.57251	9.57251	5.84408	22.2348	8.61512	4.86359	17.9285
71.4	144.401	5.41349	5.41349	4.04231	23.4493	10.9031	8.11588	17.4531
71.7	145.033	5.99752	7.33874	5.58192	23.8095	10.3703	6.66346	17.4715
71.9	145.452	8.48732	8.48732	5.77967	22.9382	9.24224	6.30591	17.7538
72.3	146.285	4.37002	4.37002	2.49979	21.4891	10.667	7.06375	15.9643
72.7	147.113
73	147.731	6.35524	6.35524	3.88355	22.5728	8.10715	4.59486	17.978
73.1	147.936
73.2	148.141
73.5	148.753	5.11699	6.20808	4.54142	24.7436	9.97097	5.96182	17.6907
73.9	149.565	6.66021	7.21662	5.08643	23.5011	8.75581	6.0361	19.1343

## Sheet: Carp Lake
Depth (m below water surface)	Age-1 (cal ka)*	Age-2 (cal ka)	boreal forest	temperate forest	warm-temperate forest	grassland and dry shrubland	desert	tundra	savanna and dry woodland
1.3	0.398296	-0.568555	13.7086	18.4944	9.37928	12.8648	2.32929	2.32929	7.38488
1.4	0.71758	-0.153719	15.2666	17.76	10.4936	16.426	4.35121	4.00848	10.9782
1.5	1.0409	0.261575	10.101	11.4517	6.91479	11.7251	1.18056	5.57347	5.39119
1.6	1.36823	0.677347	15.3611	17.3331	9.83712	17.5848	4.46097	6.04211	11.6788
1.7	1.69955	1.09362	11.6312	12.7299	7.59881	15.3713	3.02535	7.32392	6.94862
1.8	2.03484	1.5104	15.0416	16.6013	9.60718	15.0382	2.37088	3.58004	10.4184
1.9	2.37406	1.92772	12.2935	13.1705	7.94813	15.7999	3.7722	6.46839	10.2012
2	2.7172	2.3456	9.76021	10.6813	6.73121	16.9936	3.77614	8.48819	7.58433
2.1	3.06423	2.76405	12.6781	14.6738	9.14204	16.9991	2.92426	6.22009	8.78337
2.2	3.41513	3.18309	11.967	14.0918	9.17449	18.8335	7.98662	7.61539	14.3954
2.3	3.76988	3.60275	12.9185	14.7946	9.72869	16.1256	5.83445	4.39557	13.4614
2.4	4.12844	4.02304	12.5959	14.3578	9.59204	13.6503	2.77177	3.39232	10.3646
2.5	4.4908	4.44398	13.1457	14.4702	10.0328	15.1855	3.2361	3.07698	12.2859
2.6	4.85693	4.86558	13.0448	14.925	10.083	14.3092	2.30218	3.11937	10.3412
2.7	5.22681	5.28788	13.5945	16.6172	11.2921	15.3834	2.29754	2.29754	10.5669
2.8	5.60042	5.71089	12.7689	14.8155	11.1411	16.2954	4.80533	4.45631	12.5931
2.9	5.97772	6.13462	10.8328	13.7632	11.1431	14.4572	2.46315	3.15158	10.2389
3	6.3587	6.5591	11.4042	13.0426	9.29964	15.467	4.24488	3.96782	12.3404
3.1	6.74333	6.98435	12.7955	14.0397	11.4067	15.6831	1.91935	3.03218	11.9631
3.2	7.13159	7.41038	12.4475	13.7838	11.6953	15.9853	3.19891	3.22613	12.3677
3.3	7.52346	7.83721	13.402	15.7287	12.3088	15.2677	3.1894	2.45613	11.8282
3.4	7.9189	8.26487	8.4917	9.90821	8.01562	11.556	2.28866	0.518476	9.62102
3.5	8.3179	8.69337	10.1149	10.5771	8.15676	15.1534	1.13228	6.19597	8.49515
3.6	8.72043	9.12274	9.5799	10.2007	7.58096	16.3123	2.76211	7.30794	9.44327
3.63	8.84188	9.25172	10.0775	11.2631	8.06077	17.3077	4.72877	6.00441	11.604
3.8	9.536	9.98413	4.88355	4.88355	3.73382	13.7811	7.38592	5.82345	9.29187
4.3	11.635	12.154	6.35444	6.35444	4.45425	10.6158	4.63289	2.97765	8.21748
4.4	12.065	12.591	11.1117	11.1117	6.58685	19.3205	9.99043	4.16724	16.4613
4.49	12.4547	12.9851	11.6327	11.6327	8.37157	16.5984	4.54265	3.63104	13.4937
4.55	12.7161	13.2484	10.7991	10.7991	6.94747	17.7719	6.57361	5.08105	14.5476
4.7	13.3745	13.9081	6.01903	6.01903	3.28266	17.7696	7.10294	6.0211	13.7977
4.9	14.2638	14.7917	8.52423	8.52423	3.60041	19.8814	8.55917	7.40801	13.7151
5	14.7133	15.2351	7.76181	7.76181	3.7218	21.2373	11.4618	8.91791	13.4587
5.4	16.5426	17.0206	5.28591	5.28591	2.39424	15.9385	7.03313	7.18253	9.58215
5.5	17.0077	17.47	5.84008	5.84008	3.2191	19.0269	7.68712	8.1204	13.0578
5.6	17.4758	17.9206	5.18959	5.18959	3.38083	18.2883	7.80245	7.84855	12.0528
5.82	18.5164	18.9165	6.64838	6.64838	4.71295	18	6.04169	6.29798	13.0027
5.9	18.8983	19.2802	4.70566	4.70566	2.53812	16.9249	7.03363	6.59427	11.3204
6	19.3784	19.736	4.76585	4.76585	2.50237	15.3378	6.52308	5.291	11.2369
6.12	19.9584	20.2847
6.2	20.3474	20.6517	3.42089	3.42089	2.18854	12.6744	4.99097	3.96559	9.05062
6.3	20.8362	21.1116
6.39	21.2786	21.5267	4.51395	4.51395	2.21721	9.4467	3.61146	3.48236	6.58831
6.5	21.8224	22.0356
6.6	22.3197	22.4997	6.53938	6.53938	3.44265	17.3812	7.57673	6.18132	12.2388
6.7	22.8199	22.9653
6.8	23.3227	23.4324	6.22974	6.22974	3.83976	15.4769	6.44105	4.99247	11.6219
6.9	23.8284	23.901
7	24.3367	24.3711	6.4149	6.4149	3.40389	17.252	7.83687	6.14523	11.7354
7.1	24.8477	24.8427
7.2	25.3614	25.3159	5.03859	5.03859	3.27368	19.6164	9.04332	7.40802	13.6062
7.3	25.8778	25.7907
7.4	26.3967	26.267	4.40566	4.40566	2.11511	12.9269	4.01379	5.15843	8.7595
7.5	26.9183	26.745
7.6	27.4424	27.2246	3.95927	3.95927	2.26908	11.0053	4.52262	3.79726	7.50238
7.7	27.9691	27.7058
7.8	28.4983	28.1887	4.19537	4.19537	2.76851	12.4591	4.36133	4.38921	8.41598
7.9	29.03	28.6733
8	29.5642	29.1596	6.12277	6.12277	4.30347	14.1297	4.92505	4.38448	11.0185
8.07	29.9396	29.501
8.2	30.6399	30.1374	3.76452	4.02521	2.72298	11.9249	3.91191	4.14094	8.33697
8.3	31.1814	30.6289
8.4	31.7252	31.1223	7.07903	7.37757	4.59572	16.4449	4.3317	6.30176	10.9587
8.5	32.2714	31.6174	8.30712	8.30712	4.71121	17.8786	4.67545	7.43553	11.8224
8.7	33.3708	32.6131	10.3629	11.1624	6.73942	20.4825	5.40136	7.79431	13.5929
8.8	33.9239	33.1138	10.2516	10.5575	6.20135	19.9794	4.94454	6.38002	13.7261
8.9	34.4793	33.6163	9.93531	10.4018	5.97018	20.4441	6.19172	7.78177	14.2551
9	35.0369	34.1207	9.92525	10.7269	6.69686	20.6491	6.2185	7.02124	13.9599
9.1	35.5967	34.627	9.20084	9.20084	6.03176	19.7688	5.43282	7.98359	13.1353
9.19	36.1024	35.0844	8.67629	10.0345	5.07993	20.7175	7.36693	8.18617	12.8953
9.3	36.7229	35.6456	9.62296	10.2358	4.86177	16.3195	4.80486	6.12099	10.9383
9.4	37.2893	36.1578	12.0644	12.3878	7.30463	16.8444	4.33426	4.79378	12.1845
9.9	40.1521	38.7491	10.4813	10.7969	7.00245	17.7786	3.73302	5.7156	12.6942
10	40.7308	39.2736	11.5089	11.5089	7.95467	17.3737	3.89609	4.65089	13.7831
10.08	41.1951	39.6947	10.6786	11.0622	8.59126	18.0945	3.90655	4.52889	14.3068
10.2	41.894	40.3289	9.01206	9.36364	7.31447	18.8327	5.00111	7.11177	13.4185
10.3	42.4785	40.8597	10.6631	10.6631	7.3199	18.0936	4.03635	5.73907	13.533
10.5	43.6532	41.928	7.29057	7.73667	5.21788	15.1193	5.41289	5.242	12.0105
10.6	44.2433	42.4654	4.0607	4.26633	2.82286	12.8714	6.17664	4.8936	9.83426
10.7	44.8353	43.005	5.73027	5.73027	3.225	14.3489	6.29776	4.76121	11.3713
10.8	45.4291	43.5469	9.8165	10.4652	6.76023	20.9777	8.81298	6.16806	15.9879
10.9	46.0246	44.0911	7.39368	8.93014	5.64971	22.4739	11.5786	9.20414	16.3011
11	46.6219	44.6375	4.53518	4.53518	3.26296	11.7934	4.36795	3.59569	9.54195
11.11	47.2809	45.2412	4.53518	4.53518	3.26296	11.7934	4.36795	3.59569	9.54195
11.2	47.8217	45.7373	6.81757	6.81757	4.57841	15.5321	5.76322	4.97819	11.8779
11.29	48.3638	46.2352	8.85174	9.9266	6.29987	23.158	10.6489	9.1451	16.8701
11.4	49.0282	46.8464	3.69999	3.69999	2.42834	6.84522	2.45182	2.19309	5.10881
11.5	49.6339	47.4046	9.61412	9.61412	6.66223	19.5968	7.16593	7.98989	13.8554
11.6	50.2412	47.9651	7.94282	8.2403	5.79022	18.3262	7.2108	8.36039	12.6218
11.7	50.8502	48.5281	7.08814	7.73063	5.85827	17.7812	6.76925	8.08138	11.4289
11.9	52.0727	49.6613	10.9761	11.623	6.79954	19.119	7.8887	6.99447	13.8918
12	52.6862	50.2316	8.27704	8.69867	5.57549	19.4452	9.35522	7.87445	14.7897
12.1	53.3012	50.8044	6.95102	6.95102	4.50142	19.4419	9.7743	7.6233	13.9526
12.2	53.9177	51.3797	6.23377	6.43454	3.76073	11.4504	3.86777	3.66128	8.84167
12.3	54.5357	51.9576	10.8581	11.8111	8.3269	17.4238	4.73867	5.65555	13.0854
12.43	55.3411	52.7126	9.17499	9.64692	6.4687	18.2561	6.33498	7.5975	13.377
12.5	55.7758	53.121	6.70513	6.70513	5.42757	19.8179	7.92784	9.14375	13.2138
12.6	56.3979	53.7065	8.46973	8.78771	5.81548	16.993	6.24281	5.69115	12.0695
12.68	56.8966	54.1769	7.66855	8.0657	5.55616	16.4093	6.10874	5.649	11.8976
12.8	57.6462	54.8855	5.90152	6.397	3.83154	17.2019	7.68543	5.97399	12.037
12.9	58.2723	55.479	11.9424	12.3796	7.80806	17.2957	5.04981	5.90892	13.7542
13	58.8997	56.0751
13.1	59.5283	56.6739	9.61754	11.2225	8.09952	17.6639	5.15666	4.58523	13.8425
13.2	60.1582	57.2754	9.87113	9.87113	7.61773	15.7772	3.11791	3.53842	12.6254
13.29	60.7261	57.8191	9.31255	10.039	7.23057	17.2865	4.51622	5.35634	13.383
13.4	61.4215	58.4866	10.4503	10.8285	7.93241	16.3887	4.2159	4.05923	12.9846
13.5	62.0549	59.0964	9.47577	9.90373	7.58865	15.9199	3.92632	3.22491	12.8723
13.6	62.6894	59.7089	11.2707	11.7424	8.24902	15.5993	3.43964	3.25952	12.6733
13.7	63.3251	60.3242	11.9616	12.2766	8.54278	18.8177	5.4999	5.70625	14.7324
13.77	63.7707	60.7566	10.4146	11.1455	8.31804	17.8313	4.45791	5.63145	13.4512
13.9	64.5996	61.5634	11.318	12.0037	8.6585	15.9847	2.94314	4.36277	11.892
14	65.2384	62.1872	11.4309	12.5322	9.11074	16.9783	3.49656	4.22329	13.3823
14.1	65.8782	62.8139	11.0421	12.2321	9.17953	15.4485	2.95402	3.25381	12.4397
14.2	66.5191	63.4435	10.215	10.8046	8.70696	16.0764	3.78064	2.07639	13.8918
14.3	67.1608	64.0761	9.19765	9.87224	7.23177	18.6279	5.35213	5.887	13.8925
14.4	67.8036	64.7115	9.45338	9.95183	8.16842	18.1531	4.23732	4.91757	13.7944
14.5	68.4472	65.35	10.0061	10.0061	7.24807	17.56	3.73132	4.5875	13.8217
14.6	69.0917	65.9914	10.9493	11.283	7.77972	17.6359	3.93769	4.37068	13.4035
14.7	69.7371	66.6358	8.58798	9.62618	7.00977	18.4871	5.61069	5.33976	14.3289
14.8	70.3834	67.2832	10.9621	11.5211	7.35552	16.1418	3.69954	4.15376	11.8243
14.9	71.0304	67.9336	11.8497	12.4796	7.8725	19.275	4.93073	5.45168	14.7365
15	71.6783	68.5871	12.2395	12.8633	7.90031	18.6217	4.63275	5.29703	13.7813
15.1	72.3269	69.2437	11.369	11.8226	7.25278	18.2637	4.69675	6.3468	13.0671
15.19	72.9113	69.8372	12.3045	14.4365	8.75965	22.8845	9.35624	8.57187	15.038
15.3	73.6264	70.5661	9.40666	12.6869	9.36069	25.1136	12.3245	10.2881	16.2303
15.4	74.2772	71.2319	8.30528	12.2281	8.56848	26.2194	13.6647	10.8399	17.3168
15.5	74.9287	71.901	10.8019	13.9095	9.07608	24.598	10.989	8.87257	15.9475
15.6	75.5808	72.5732	8.47177	12.3289	9.60207	25.8169	10.8645	11.0447	15.1502
15.7	76.2336	73.2486	11.0773	14.2203	8.59786	23.4638	9.74588	10.7715	13.6176
15.8	76.887	73.9271	10.9879	15.4508	10.344	27.9221	11.6935	12.2282	16.7771
15.9	77.5409	74.6089	10.8033	15.0256	9.70851	26.5539	10.9018	11.4838	15.6766
16	78.1954	75.294	11.9935	16.9912	10.5619	28.3677	13.6924	11.6338	18.6003
16.1	78.8504	75.9823	12.4878	16.8282	10.0423	25.7202	10.5156	11.4998	16.2234
16.2	79.506	76.6739	9.66088	12.6822	8.33615	25.6914	11.318	11.6763	16.8333
16.3	80.162	77.3688	10.3829	13.8664	8.95511	24.0813	9.44127	10.2234	14.8284
16.4	80.8185	78.067	9.36166	12.3417	7.83375	23.6459	9.58876	10.3753	14.3965
16.47	81.2783	78.5578	12.1257	15.7161	9.71824	25.2891	10.266	11.2992	16.0216
16.6	82.1327	79.4735	8.0669	10.6588	6.91052	22.0984	8.21051	9.02652	13.6666
16.7	82.7905	80.1818	6.17141	6.17141	4.21476	16.9202	4.1993	2.51008	15.3549
16.74	83.0536	80.466	7.79102	7.79102	4.90925	16.4481	4.07604	2.83759	13.9302
16.8	83.4485	80.8935	7.28342	7.28342	4.39265	16.9081	4.54212	3.33198	13.9493
16.9	84.107	81.6086	7.97949	7.97949	5.18128	17.6924	5.75553	3.57718	14.9344
17	84.7657	82.3271	9.46998	9.46998	5.99506	16.5089	4.16573	2.38919	14.1197
17.1	85.4247	83.0491	11.2561	11.2561	8.00862	15.1356	2.14423	1.07211	14.0635
17.2	86.084	83.7746	8.35508	8.35508	7.08091	16.5052	2.49748	2.11112	14.394
17.3	86.7436	84.5035	8.83787	9.23439	6.9362	19.6466	5.44587	3.80177	15.8449
17.4	87.4033	85.236	8.49716	9.09265	6.44527	20.1802	5.23024	5.23024	15.7921
17.49	87.9973	85.8982	9.41695	10.025	7.57847	20.6152	6.50247	4.76129	16.4205
17.6	88.7234	86.7115	10.6403	11.0153	6.789	21.4471	6.61906	7.59133	16.0054
17.7	89.3837	87.4546	8.21861	8.58924	5.39802	20.5968	7.6415	5.45591	16.7769
17.8	90.0441	88.2013	9.56515	9.56515	6.63281	19.2212	5.7672	4.90444	15.6156
17.9	90.7046	88.9517	11.7833	11.7833	7.99668	17.5835	3.99028	3.55601	14.6815
18	91.3652	89.7056	10.6312	10.6312	7.2278	16.3703	3.82424	2.71227	14.4444
18.1	92.0258	90.4632	12.1489	12.1489	6.87459	18.4186	6.33387	5.67024	15.3205
18.2	92.6865	91.2244	11.2461	11.9462	5.85013	22.1127	10.1306	7.58798	16.8527
18.32	93.4793	92.1428	10.482	11.7266	7.68619	19.9547	6.54038	6.19062	14.7241
18.4	94.0078	92.758	12.3623	12.3623	9.11547	13.5956	1.60514	1.20386	12.3917
18.52	94.8005	93.6853	7.98724	9.95844	7.50895	23.0074	8.79273	7.2302	17.072
18.66	95.7252	94.7739	10.0297	10.8985	6.84038	21.174	8.66691	7.25839	16.151
18.75	96.3195	95.4777	10.754	11.2193	6.56684	19.7246	7.05776	6.29033	15.2952
19	97.9699	97.4487	12.4236	12.778	8.21431	15.7222	3.57375	3.65274	13.2796
19.1	98.6297	98.2438	10.1857	11.4324	7.34785	21.5727	8.52664	6.2528	17.2152
19.54	101.53	101.788	12.2223	12.735	7.31687	19.4862	5.97676	5.15225	15.8992
19.62	102.057	102.441	8.42812	8.42812	5.04861	13.9265	4.5147	5.42023	9.94217
19.8	103.241	103.919	7.45575	8.07972	5.1154	13.2063	4.50578	4.15717	10.7668
19.9	103.899	104.745	8.80406	8.80406	6.64125	14.0257	3.30273	3.10573	11.3444
20	104.556	105.576	13.1413	13.5597	8.50896	20.8229	6.50372	7.11643	16.585
20.1	105.212	106.41	11.7681	11.7681	8.03095	17.3075	3.8593	4.07091	14.9382
20.2	105.869	107.249	12.542	12.542	8.07473	19.8684	6.04627	5.28892	17.0166
20.21	105.934	107.333	13.9253	14.2378	7.48993	18.5048	4.99987	5.0665	15.5421
20.3	106.524	108.091	11.5582	11.5582	6.49844	19.8969	6.71591	6.54457	14.9403
20.4	107.18	108.938	12.8605	12.8605	6.92158	17.1559	5.3765	6.12765	13.5367
20.45	107.507	109.363	12.8681	13.4076	8.49559	18.1957	4.82049	5.79357	13.3887
20.71	109.207	111.589	12.8841	12.8841	7.03167	18.2957	6.38908	6.24181	13.3809
20.8	109.795	112.366	9.11329	9.11329	5.85369	19.8571	7.31347	7.24308	14.4597
20.9	110.447	113.234	10.6786	11.5827	5.7254	20.9645	7.05378	6.66889	15.264
20.95	110.773	113.669	10.983	10.983	5.20222	22.2166	9.42842	8.23697	16.8177
21.1	111.75	114.981	11.2207	11.5942	6.09175	20.7227	7.95617	6.97852	15.2926
21.2	112.4	115.862	13.858	13.858	8.83641	15.4778	4.1118	3.41921	13.6899
21.3	113.05	116.746	10.819	10.819	7.7145	17.9185	5.39227	5.62519	14.1685
21.45	114.023	118.081	10.4741	10.8214	7.22881	21.2112	8.92133	7.14225	16.4071
21.5	114.347	118.528	10.3371	10.3371	7.19686	21.4392	8.57831	7.564	16.2084
21.6	114.994	119.425	9.34878	9.88833	5.92472	22.5735	11.2356	8.84049	17.157
21.7	115.641	120.327	8.80312	8.80312	5.60185	23.1832	10.0594	9.50588	16.8931
21.8	116.286	121.232	10.6607	11.191	6.88119	22.8262	10.4144	8.75331	17.4598
21.9	116.931	122.143	8.7787	8.7787	5.7615	22.5467	10.5371	10.1063	15.7284
22	117.575	123.058	12.0474	12.0474	9.01881	20.0498	5.39919	5.17572	16.5631
22.15	118.539	124.438	13.1547	13.5428	8.86836	20.8266	7.44049	6.27833	17.3216
22.2	118.86	124.9	11.4043	11.8089	9.0854	23.8372	7.56385	6.73847	19.5132
22.3	119.501	125.828	11.8444	12.5961	9.67515	20.2021	5.44506	4.04421	16.1578
22.4	120.142	126.761	12.4996	14.704	10.3183	20.1171	5.78736	4.9001	15.6845
22.5	120.781	127.698	10.123	11.3329	9.00651	21.9693	7.53585	7.49966	15.8577
22.6	121.419	128.64	14.5088	15.6447	9.63199	18.0119	4.87529	3.52512	13.71
22.7	122.056	129.586	12.212	13.3737	9.13854	19.2924	5.35324	4.03977	14.6104
22.75	122.374	130.06	11.0614	12.7666	9.69774	19.9603	5.24095	3.71194	15.6098
22.9	123.327	131.491	10.0913	11.8349	9.17122	21.3149	7.26232	4.09087	16.6179
23	123.961	132.451	10.7366	12.603	9.76981	23.1792	9.46916	3.29057	18.8127
23.1	124.593	133.415	11.5076	13.1565	9.87402	23.126	9.17658	2.88927	19.354
23.15	124.909	133.899	10.2451	11.5511	9.18847	23.2172	9.61793	3.72913	18.9703

## Sheet: Potato Lake
Depth cm	Depth cm	Age	Age (ka)	boreal forest	temperate forest	warm-temperate forest	grassland and dry shrubland	desert	tundra	savanna and dry woodland
25	25	1389.13	1.38913	13.466	16.3337	15.7602	28.8059	7.23639	7.00343	19.7459
30	30	1470.88	1.47088	10.3484	12.2664	12.2664	25.1563	7.62002	7.75613	16.0604
35	35	1552.63	1.55263	11.1701	13.5495	12.1694	26.7804	8.77013	8.21196	17.904
40	40	1634.38	1.63438
45	45	1716.13	1.71613	12.5371	15.1611	14.0159	25.6587	7.3144	8.24291	16.1742
50	50	1797.88	1.79788
55	55	1921.8	1.9218	10.795	13.3004	12.0965	25.4524	8.6504	10.0581	14.6947
60	60	2179.3	2.1793
65	65	2436.8	2.4368	10.5267	12.5168	12.5168	25.1503	6.34301	8.92072	15.6265
67.5	67.5	2565.55	2.56555
70	70	2694.3	2.6943	10.7849	13.7136	12.5703	27.4838	8.82783	9.58301	16.6871
72.5	72.5	2823.05	2.82305
75	75	3022.95	3.02295	11.3099	14	13.4265	26.571	7.95382	10.4038	15.8551
77.5	77.5	3299.97	3.29997
80	80	4398.4	4.3984	11.2497	13.4028	12.589	28.3409	8.11304	9.39475	17.3685
82.5	82.5	5496.72	5.49672	11.4948	14.7286	12.5401	28.4428	8.64521	10.0968	16.7291
85	85	6595.05	6.59505	14.2547	17.2448	14.7047	29.6357	8.25115	9.97859	17.8179
87.5	87.5	7693.38	7.69337	12.3742	16.2547	13.2431	31.0569	9.87058	12.1654	18.451
90	90	8791.7	8.7917	13.3705	15.8576	11.3363	28.982	10.2196	11.3811	18.9432
92.5	92.5	9890.03	9.89003	13.3521	16.5788	13.2738	30.1497	9.96347	11.4088	18.7644
95	95	10086.1	10.0861
97.5	97.5	10282.2	10.2822	13.9637	16.2816	11.6825	29.8231	10.9514	10.9483	20.8929
100	100	10478.3	10.4783
105	105	10870.5	10.8705
107.5	107.5	11066.6	11.0666	13.6613	15.7191	11.9345	27.7502	8.74567	7.0435	20.8339
112	112	11419.5	11.4195
130	130	12831.4	12.8314	15.1401	16.7443	11.6721	25.9259	7.33958	6.52065	18.8512
150	150	14400	14.4
170	170	14692	14.692	15.1417	15.7152	8.54904	23.3324	6.76152	4.33554	19.2345
190	190	14984.3	14.9843
210	210	15276.5	15.2765	17.5715	18.1404	9.50071	21.8385	6.82291	2.98243	19.0917
250	250	15861	15.861
270	270	16153.2	16.1532
290	290	16445.5	16.4455	15.299	16.6724	9.32283	24.1511	8.6318	5.70005	20.1577
310	310	16737.7	16.7377
330	330	17030	17.03
350	350	17322.2	17.3222	13.5774	14.7883	7.78016	21.58	5.38163	1.62459	18.7445
370	370	17614.4	17.6144
390	390	17906.7	17.9067
430	430	18491.2	18.4912
450	450	18783.4	18.7834	13.557	14.5252	7.19532	19.9034	6.12182	3.85405	16.1992
468	468	19046.4	19.0464
490	490	19367.9	19.3679	14.6581	15.46	7.10804	18.6048	5.23729	2.25011	15.5528
510	510	19660.1	19.6601
550	550	20244.6	20.2446	12.0121	12.8064	5.79525	21.9166	8.00994	5.0549	18.8756
595	595	20902.1	20.9021
610	610	21121.3	21.1213	13.0458	13.969	7.6056	20.6122	6.83871	6.94393	15.6138
650	650	22828.9	22.8289	14.2769	15.9863	9.26151	24.9916	7.86017	8.85056	17.4985
670	670	23744.8	23.7448	15.7882	17.5031	10.463	23.1045	7.48958	5.05159	17.718
690	690	24660.7	24.6607	11.9812	14.4671	8.49207	22.9698	7.4569	4.76999	17.3039
710	710	25576.7	25.5767	15.5643	18.1044	10.7465	23.979	8.0352	7.56298	18.619
730	730	26492.6	26.4926	12.7522	14.6897	6.99233	20.5336	8.54283	6.34252	16.4179
750	750	27408.5	27.4085	11.3101	13.6424	7.85481	22.7075	8.30797	5.97585	19.1162
770	770	28324.4	28.3244	13.1311	14.5652	7.928	23.1703	8.86325	7.43424	17.328
790	790	29240.3	29.2403	15.4688	17.0883	9.98849	23.364	7.28337	6.90194	16.7975
810	810	30156.3	30.1563	13.6091	14.867	8.4179	22.0207	6.87819	4.15829	17.4
830	830	31072.2	31.0722	15.4545	17.5934	9.59017	21.5067	6.24219	6.17874	15.4757
855	855	32217.1	32.2171	14.7212	15.669	7.86368	20.4113	7.78272	4.31082	17.0209
880	880	33362	33.362	15.8739	17.8863	10.8557	23.4851	7.04507	6.0987	17.0484
905	905	34506.9	34.5069	12.9306	14.5422	7.23587	18.4076	5.28719	0.805823	15.9902
925	925	35422.8	35.4228	15.8928	17.2643	10.3007	25.1588	9.49176	7.91072	19.3681

## Sheet: San Felipe
Sample depth	Age (years)	Age (ka)	boreal forest	temperate forest	warm-temperate forest	grassland and dry shrubland	desert	tundra	savanna and dry woodland
455	16000.7	16.0007	5.90969	7.48931	6.6131	18.8644	9.30192	0	17.2848
460	16562.4	16.5624	5.75766	7.07988	6.24364	19.9272	9.74062	2.18931	17.2519
470	17685.8	17.6858	5.41686	6.95337	6.95337	18.7448	9.30497	0.410651	16.7977
480	18809.2	18.8092	5.77691	7.13648	6.39181	18.6351	9.3064	0.429934	16.8456
485	19370.9	19.3709	5.15801	6.11937	5.51135	20.4467	10.0555	1.88216	17.6032
491	20044.9	20.0449	4.39696	5.52614	4.92257	17.8371	8.71563	1.16601	15.5419
498	20831.3	20.8313
503	21393	21.393	5.25901	6.61076	6.03437	18.1306	9.07574	0.911353	15.8675
518	23078.1	23.0781	5.08417	6.71354	5.77282	19.0353	9.10513	1.36142	16.0445
523	23639.8	23.6398
537	25212.6	25.2126	6.0876	7.711	7.04825	18.4443	7.81025	2.14728	14.6736
542	25774.3	25.7743	4.74094	6.08934	5.51438	19.7494	10.672	1.77983	16.6212
557	27459.4	27.4594	5.35485	7.4776	6.64498	20.9121	10.9632	1.44212	17.3472
562	28021.1	28.0211	6.26191	8.01873	7.05648	20.8616	10.6625	3.23543	16.6551
567	28582.8	28.5828
572	29144.5	29.1445	6.17937	7.44126	6.87693	21.3422	10.9913	3.42482	17.0545
577	29706.2	29.7062
582	30267.9	30.2679	6.4198	8.6332	7.62889	21.5534	11.2206	3.55259	16.167
587	30829.6	30.8296
592	31391.3	31.3913	5.5843	7.28175	6.56868	20.4304	11.0258	2.86636	16.2782
607	33076.4	33.0764	4.86383	6.47287	5.90399	18.8745	9.57166	1.78985	15.4757
612	33638.1	33.6381
617	34199.8	34.1998	5.97396	7.41734	6.72396	22.5131	11.6261	2.86031	18.6098
622	34761.5	34.7615
627	35323.2	35.3232	6.81219	8.29281	7.37457	21.3338	11.4727	2.59633	17.2568
629	35547.9	35.5479
632	35884.9	35.8849
637	36446.6	36.4466	6.11197	7.62444	6.72056	22.2486	11.5526	1.7986	18.9375
642	37008.3	37.0083	7.06318	8.22078	7.5119	21.1244	10.8573	1.76668	18.6094
652	38131.7	38.1317	5.33974	6.05357	5.43538	18.969	9.94052	2.6266	15.9855
657	38693.4	38.6934
662	39255.1	39.2551	7.27598	8.63566	7.81574	19.6799	8.95382	1.5695	16.7507
667	39816.8	39.8168
672	40378.5	40.3785	7.10107	8.36429	7.17331	22.952	11.0475	2.3008	19.388
677	40940.2	40.9402
682	41501.9	41.5019	8.92642	9.89497	8.45838	19.5132	8.60457	0.612564	17.9321
687	42063.6	42.0636	8.66988	9.65521	8.57584	22.3671	10.1716	3.03518	18.9698
692	42625.3	42.6253
698	43299.3	43.2993	7.19885	8.67473	7.58472	23.4208	11.551	3.13662	19.6983
706	44198	44.198	6.37183	8.0206	7.25736	23.4423	10.7349	2.08466	19.7088
721	45883.1	45.8831	5.74939	7.24845	6.18845	21.5272	10.8372	2.62528	17.8035
726	46444.8	46.4448
731	47006.5	47.0065	6.32476	7.80455	6.84935	24.0908	13.7339	2.56307	20.9023
