# Supplementary material for: Terrestrial biosphere changes over the last 120 kyr
Source: Copernicus journal article supplement (doi:10.5194/cp-12-51-2016), 2016-01-18
Supplement: Supplementary file 1 [file cp-12-51-2016-supplement.zip › supplement/North_America/NorthAmerica_scores_Williamsetal2000.xls]

## Sheet: Amarok
Depth (cm)	Unit	Age	desert	grassland and dry shrubland	boreal forest	tundra	warm-temperate forest	savanna and dry woodland	temperate forest
2	A-III	Holocene	5.68414	12.8928	15.567	20.2039	4.22513	5.6004	15.567
5	A-III	Holocene	7.04624	15.7406	14.8754	24.7495	3.88328	7.29687	15.3161
10	A-III	Holocene	7.18178	15.2156	13.2601	22.2168	3.08532	7.21014	14.1545
15	A-III	Holocene	7.12973	14.0086	13.9183	23.6868	3.16322	6.6347	14.7727
20	A-III	Holocene	6.19279	13.8826	15.7993	23.0992	4.06698	6.15181	16.4034
25	A-III	Holocene	7.12128	14.7467	12.9905	23.2553	3.41066	6.9751	12.9905
30	A-III	Holocene	8.8189	14.5856	9.91527	21.479	3.05671	6.54482	11.0151
35	A-III	Holocene	8.63411	15.3709	8.6172	21.7513	2.60347	6.77814	9.01945
40	A-III	Holocene	6.83436	13.5613	10.9321	21.9518	4.08566	5.21102	11.5033
45	A-III	Holocene	10.0038	16.591	11.8748	25.1628	5.48711	8.13365	12.4109
50	A-III	Holocene	8.77213	15.4256	10.455	24.5729	4.28094	6.19711	12.0318
55	A-III	Holocene	7.94456	16.5864	6.38893	20.7007	1.6657	5.99565	6.38893
60	A-III	Holocene	5.99092	12.6863	9.90812	22.8676	3.16486	4.15343	9.90812
65	A-II	Holocene	7.6755	15.2131	7.1222	21.5856	1.61306	5.13952	7.79035
70	A-II	Holocene	8.73198	15.6482	6.29944	21.6903	1.57486	5.75903	6.29944
75	A-II	Holocene	9.20172	14.4501	5.76913	20.3346	2.13201	5.6994	7.19047
80	A-II	Holocene	6.62167	13.9069	8.52068	21.6825	3.24409	4.59921	9.0277
85	A-II	Holocene	9.66467	15.4151	6.40252	22.184	1.66576	6.99261	7.01223
90	A-II	Holocene	10.736	14.5297	6.66995	22.9708	2.82405	5.36578	7.33662
92.5	A-II	Holocene	11.8399	16.4529	5.73741	22.2987	1.02062	7.99059	6.32666
95	A-II	Holocene	6.83938	13.6049	7.6753	23.0898	1.89534	4.50048	7.6753
97.5	A-II	Holocene	10.4962	15.5108	6.4432	23.6637	1.72345	6.90794	6.4432
100	A-II	Holocene	10.7504	15.912	4.3098	22.0307	0.628695	6.00986	4.3098
102.5	A-II	Holocene	8.16596	12.5492	5.53939	20.3842	1.17242	3.36019	5.53939
105	A-II	Holocene	9.14532	15.1899	11.8515	23.3853	5.40886	5.7072	13.4034
107.5	A-II	Holocene	9.39183	13.157	6.18114	19.2778	1.40028	4.30325	6.88128
110	A-II	Holocene	10.871	15.5358	7.22131	20.9049	1.18958	7.53745	7.22131
112.5	A-II	Holocene	11.4917	15.1195	8.20664	20.9392	0.615457	5.9958	8.20664
115	A-II	Holocene	10.2188	12.3388	7.85272	18.2261	1.31024	3.90984	7.85272
116.5	A-II	Holocene	9.15945	14.1436	9.52159	20.9508	1.49268	5.91806	9.52159
120	A-I	Last Interglacial	5.42051	12.9045	13.6762	22.7241	4.29153	5.71634	14.0756
122	A-I	Last Interglacial	4.01511	9.94468	14.1911	21.3363	2.39469	3.98717	14.1911
127	A-I	Last Interglacial	3.62258	10.6005	14.6551	22.4657	3.43157	3.64029	15.0803
130	A-I	Last Interglacial	2.92933	8.91505	15.1478	20.4906	2.8378	3.57227	15.1478
135	A-I	Last Interglacial	4.05439	10.5075	14.9969	22.703	3.12011	3.85244	14.9969
140	A-I	Last Interglacial	2.51897	8.75197	15.1936	22.1712	2.62794	2.73388	15.9885
145	A-I	Last Interglacial	3.46571	9.23655	14.645	22.3939	3.05374	2.25541	14.645
150	A-I	Last Interglacial	4.7026	12.902	13.8507	22.5275	3.50638	5.80475	14.2208
155	A-I	Last Interglacial	3.35041	10.2402	15.0657	22.6119	3.35185	3.81598	15.4763
160	A-I	Last Interglacial	2.7195	7.90646	14.1979	20.3554	2.63494	2.30931	14.9904
165	A-I	Last Interglacial	5.36662	10.6326	11.2025	20.858	1.06184	4.10009	11.2025
170	A-I	Last Interglacial	4.64446	11.2078	13.9214	21.8256	3.00739	4.45119	13.9214
175	A-I	Last Interglacial	3.74217	10.2745	14.5778	22.3566	3.16349	3.49985	14.5778
180	A-I	Last Interglacial	3.8105	9.461	15.4484	21.6079	2.37906	3.566	15.4484
185	A-I	Last Interglacial	5.58109	13.3799	13.5927	24.8815	3.65683	6.17293	13.5927
190	A-I	Last Interglacial	3.81554	10.6424	14.4901	24.1975	4.24682	3.05546	14.4901
195	A-I	Last Interglacial	5.03783	13.1732	14.3213	22.9667	4.00386	5.74098	14.3213
200	A-I	Last Interglacial	4.88306	11.9075	14.3497	23.6382	3.42779	5.16764	14.3497
205	A-I	Last Interglacial	5.02616	10.7051	15.131	21.5831	2.96377	4.61236	15.131

## Sheet: Brother of Fog
Raw depth (cm)	Composite depth (cm)	Unit	Age	Reworked pollen grains			desert	grassland and dry shrubland	boreal forest	tundra	warm-temperate forest	savanna and dry woodland	temperate forest
15	63	B-V	Holocene				3.91952	8.15004	12.9633	19.5821	2.79352	4.25992	12.9633
22	70	B-IV	Holocene	YES - NO CLIMATE RECONSTRUCTION
29	77	B-IV	Holocene	YES - NO CLIMATE RECONSTRUCTION
36	84	B-IV	Holocene	YES - NO CLIMATE RECONSTRUCTION
43	91	B-IV	Holocene	YES - NO CLIMATE RECONSTRUCTION
50	98	B-IV	Holocene	YES - NO CLIMATE RECONSTRUCTION
57	105	B-IV	Holocene	YES - NO CLIMATE RECONSTRUCTION
64	112	B-IV	Holocene	YES - NO CLIMATE RECONSTRUCTION
71	119	B-IV	Holocene	YES - NO CLIMATE RECONSTRUCTION
77	125	B-IV	Holocene	YES - NO CLIMATE RECONSTRUCTION
81	129	B-IV	Holocene	YES - NO CLIMATE RECONSTRUCTION
86	134	B-III	Last Interglacial				4.26886	7.30614	14.061	19.7227	2.21464	3.99581	14.4906
92	140	B-III	Last Interglacial				5.06869	8.48642	12.4327	19.446	1.60156	4.08148	12.4327
98	146	B-III	Last Interglacial				4.04694	7.27084	14.4175	21.0478	2.38848	3.40645	14.4175
104	152	B-III	Last Interglacial				3.51224	7.18342	13.6052	19.3959	2.32515	3.73084	13.6052
110	158	B-III	Last Interglacial				6.2964	10.1988	13.7012	21.7555	2.67415	5.72325	14.1003
116	164	B-III	Last Interglacial				4.27244	8.41075	13.7853	21.9465	2.5466	4.38886	13.7853
122	170	B-III	Last Interglacial				4.47674	9.38367	13.7657	22.1288	3.16843	5.16802	13.7657
128	176	B-III	Last Interglacial				7.90729	14.2464	8.36469	21.2144	2.89784	6.033	8.36469
134	182	B-III	Last Interglacial				5.70019	9.22149	14.3177	21.2779	3.19664	5.40024	14.3177
140	188	B-II	Last Interglacial				5.44476	10.2085	13.7706	22.5625	4.09664	5.19349	13.7706
142	192	B-II	Last Interglacial				5.89529	10.0482	13.7191	22.5772	3.39885	5.19252	13.7191
150	198	B-II	Last Interglacial				4.15175	9.66006	15.4735	22.935	6.84187	4.6377	15.8667
160	208	B-I	Last Interglacial				3.12406	7.98461	15.4175	20.5282	5.63129	3.13972	15.4175
170	218	B-I	Last Interglacial				3.21301	8.30642	13.867	20.8363	5.0134	2.92317	13.867
180	228	B-I	Last Interglacial				2.97752	8.54002	13.8373	21.035	4.48817	3.13259	13.8373
187	235	B-I	Last Interglacial				3.5555	8.68049	14.881	21.8697	5.52672	4.04526	14.881

## Sheet: Lake Tulane
Sample	Sample age (Grimm et al. 1993)	desert	grassland and dry shrubland	boreal forest	tundra	warm-temperate forest	savanna and dry woodland	temperate forest
2267	-34	7.398	20.1829	10.2255	5.70073	18.202	10.3308	17.0884
2269	-7	8.59106	19.8426	12.0257	3.61609	17.0984	13.0912	16.6311
2271	20
2273	48	9.57598	22.2156	9.72369	6.12694	18.5335	12.3904	17.3585
2275	75
2279	130	9.31746	22.1695	11.3287	5.69122	17.6958	13.5339	18.4907
2283	185
2287	241
2291	297	5.39745	18.5991	11.8087	3.70031	18.0617	12.6791	16.9026
2295	353
2299	409	4.5304	18.0118	11.6791	3.54758	17.5471	12.2754	16.5069
2303	465
2307	522	5.54033	17.5117	10.3315	3.49448	16.732	11.4594	15.5882
2311	579
2315	636
2320	708	5.50729	18.5781	12.0072	4.29477	15.9118	12.1663	17.3837
2330	853
2340	999
2360	1297
2380	1601	5.96764	18.6182	10.6521	3.37029	16.1037	13.22	14.9556
2402	1943
2422	2260	6.33539	18.5998	11.0347	3.81722	16.7792	12.6633	16.2245
2442	2583	5.45779	18.4197	11.288	4.12165	16.2428	11.838	16.1386
2462	2912
2482	3248
2503	3608	8.01033	20.1421	9.98392	4.62707	15.4346	12.5214	15.038
2512	3764
2522	3939
2532	4115
2542	4293
2552	4473
2562	4654	8.66308	21.4653	8.42695	5.50778	14.8994	11.2342	14.8994
2572	4837
2582	5021
2591	5188
2602	5394
2612	5583	7.9124	20.535	7.58375	5.44916	14.894	9.96492	14.4759
2622	5774
2632	5966
2642	6160
2652	6355
2662	6552	8.94677	21.3926	7.42679	6.55978	13.7493	10.1128	14.3037
2672	6750
2682	6950
2691	7132
2702	7355
2712	7560	7.57934	19.9721	6.05677	5.99721	15.2375	8.12918	15.2375
2722	7766
2732	7974
2742	8183
2752	8394
2762	8606	8.22335	20.6421	6.48498	5.77373	13.4892	9.15078	13.7807
2772	8820
2782	9036
2792	9253
2798	9384
2802	9472	8.19196	21.9214	6.19918	3.71826	15.8941	11.6057	15.8941
2812	9692
2822	9914
2832	10137
2842	10362
2852	10589	10.031	23.0425	7.12725	4.52331	16.0412	13.2734	15.6726
2862	10817
2872	11046
2882	11278
2892	11510	10.6672	23.0625	5.78842	5.04892	17.9561	12.3659	17.2235
2902	11745
2912	11981
2922	12218
2932	12457	10.8222	23.4164	5.15028	3.62794	17.8846	13.8571	15.9739
2942	12698
2952	12940
2962	13184
2972	13429
2982	13676	8.14986	23.0006	9.32834	2.53251	19.8317	14.9457	19.32
2992	13924
3002	14174
3012	14426	7.3129	20.7005	8.77451	3.12798	19.0822	12.9555	19.6228
3022	14679	5.84439	20.6318	11.5781	3.00802	21.1782	13.5822	22.1212
3025	14755	6.04005	18.7552	9.70658	2.59403	21.4142	12.3428	20.0444
3044	15241	6.36339	20.904	11.7894	3.30122	21.2234	14.3795	21.8813
3051	15422	6.28931	20.5909	10.8566	2.94282	22.167	13.9247	21.673
3062	15707	7.61797	19.014	7.3829	2.791	17.9383	12.6058	17.8674
3072	15968	7.09903	12.7464	1.86636	3.05584	7.05176	7.16222	6.71833
3082	16230	6.46765	12.5717	2.867	2.90947	8.48694	7.08939	8.7581
3092	16494	8.84008	15.4525	2.55912	3.75293	8.92531	9.0181	8.0107
3102	16760
3112	17027	8.50424	15.9225	3.46478	4.17397	9.55327	9.32398	9.03694
3122	17296
3132	17566
3143	17865	5.69649	14.1888	5.40994	3.14593	11.6744	8.51816	11.8544
3151	18084
3162	18386	7.78956	15.9098	4.8114	3.2771	9.9096	9.94998	10.338
3172	18663
3182	18941
3192	19221	7.2605	13.9332	3.89164	3.12822	7.69752	9.11145	8.25123
3202	19502
3212	19785
3222	20069
3225	20155	8.05306	15.733	3.40818	3.29995	9.05306	8.81981	9.05306
3242	20643
3251	20903
3262	21222	6.04095	13.0398	5.24863	2.16405	9.58181	8.84014	9.53202
3272	21514
3282	21808	6.07638	14.1519	6.34529	2.61611	10.1953	9.57788	10.6644
3292	22104
3302	22400
3312	22699	5.77576	13.268	5.14071	2.45617	9.44001	9.19373	8.82994
3322	22999
3332	23300
3338	23482	6.9163	12.937	3.54339	2.96093	9.19699	7.8377	9.19699
3342	23604
3351	23878
3362	24214
3372	24522	13.1524	23.248	5.10083	6.15594	15.1773	13.6632	14.3786
3382	24832
3392	25143
3402	25455	11.9349	23.4504	6.47042	4.79073	15.6797	14.3064	15.5279
3412	25769
3422	26085
3432	26402	6.6345	14.96	5.6463	2.9775	9.72729	9.95006	9.72729
3442	26721
3451	27009
3462	27363	6.53546	14.8659	4.90646	3.64016	9.57229	8.47896	9.57229
3472	27686
3482	28012
3492	28338	5.60762	12.5521	5.49889	3.07007	7.8456	8.31254	8.11229
3502	28666
3512	28996
3522	29327
3532	29660	7.7533	16.8218	4.93015	3.85635	11.8485	9.53103	11.3835
3542	29994
3551	30297	4.90064	13.4788	6.2898	1.75584	11.4588	9.51933	11.1589
3562	30668
3572	31007	4.038	11.6249	6.14688	2.21135	11.0605	7.93224	10.4597
3582	31348
3592	31690	6.01999	13.7191	6.0564	4.15704	10.5174	7.8058	10.3694
3602	32034
3612	32379	6.2106	13.5748	6.42532	2.95077	9.98797	9.03212	8.93639
3622	32726
3627	32900	5.40364	11.2794	3.37058	2.8389	9.00695	6.10154	8.72294
3642	33424
3651	33741	7.69177	17.2903	5.65541	4.40477	15.5181	9.18338	14.6749
3662	34129
3672	34484	10.3797	17.9672	3.86211	5.29649	13.2256	10.2539	12.2202
3682	34840
3692	35198	10.3818	20.8312	4.8041	5.80806	13.6951	10.7236	13.1017
3702	35557
3712	35918	5.83732	12.0897	3.53894	3.12842	8.93574	6.42529	8.8532
3722	36281	7.57244	17.4023	5.79809	3.79702	13.5482	10.3157	12.766
3732	36645	4.10009	11.4986	7.05602	2.20286	12.0248	7.58912	12.101
3749	37268	6.46965	19.5307	10.3288	3.84208	19.5664	12.4465	18.2192
3755	37488	8.33632	21.9176	8.10968	5.07746	19.7624	12.161	19.204
3759	37636	9.05824	21.0181	7.16742	6.33198	19.0139	10.5343	18.1019
3769	38006
3779	38377	8.74095	20.0374	5.10338	6.64947	17.0767	9.2007	15.6201
3789	38750
3799	39125	8.97726	19.4603	5.59357	4.93602	15.2433	10.5772	13.9846
3809	39501
3819	39879	10.3444	21.3306	4.82357	4.96124	17.0758	10.926	14.9998
3829	40258
3838	40600	10.0941	22.5275	5.7315	5.59	17.0171	10.9411	15.8386
3848	40983
3858	41367	10.5665	21.6101	6.21371	4.93291	16.3982	12.0362	16.8051
3868	41752
3876	42061	9.40632	16.1732	3.73297	4.98173	10.2464	8.82205	9.76811
3886	42450
3896	42839	7.45952	19.0011	5.55641	4.90502	16.2933	9.09027	15.2167
3906	43230
3916	43623	11.0741	22.1091	6.76968	5.8181	16.0939	13.1678	16.0939
3926	44018
3936	44414
3946	44811	10.0771	19.9943	4.26999	3.86192	15.895	10.1113	14.0898
3955	45170
3969	45732	10.1806	22.2749	5.88651	5.56386	16.6376	11.3309	16.1267
3977	46054
3987	46458	11.5805	21.7468	5.74364	5.41638	13.8826	12.7747	14.4911
3997	46863	10.2886	22.1607	5.71725	5.23576	17.2542	11.7526	15.4805
4007	47270	10.2745	22.8986	6.98703	3.85917	16.1195	13.568	15.7626
4017	47679	9.01016	21.5666	6.45163	3.92344	16.2343	13.1479	14.5045
4027	48089
4032	48295
4040	48625	7.94151	21.5362	9.30461	3.5511	18.334	13.9495	17.8057
4050	49039
4060	49454	7.2883	19.901	10.6408	4.51692	17.177	14.0555	17.0621
4070	49871
4080	50289	7.10505	20.325	11.9481	4.68017	16.7838	14.1601	17.8331
4100	51131
4110	51554	6.31331	15.5544	5.1583	3.84759	13.749	7.84225	13.1248
4120	51979	8.37894	16.3089	3.40914	3.76437	9.82859	9.51179	9.82859
