# Supplementary material for: Terrestrial biosphere changes over the last 120 kyr
Source: Copernicus journal article supplement (doi:10.5194/cp-12-51-2016), 2016-01-18
Supplement: Supplementary file 1 [file cp-12-51-2016-supplement.zip › supplement/SI_1_biome_scores.pdf]

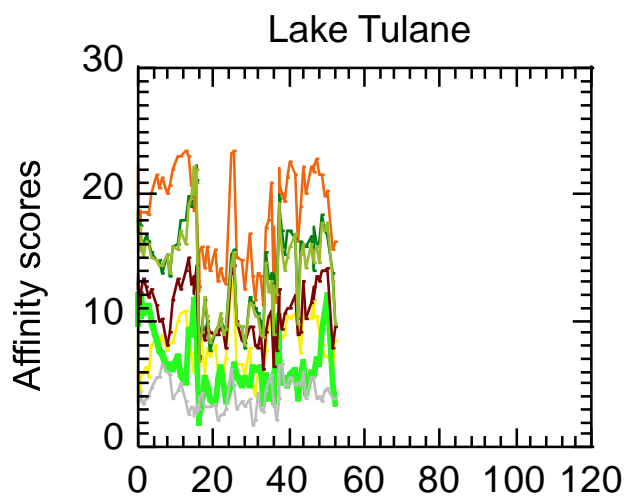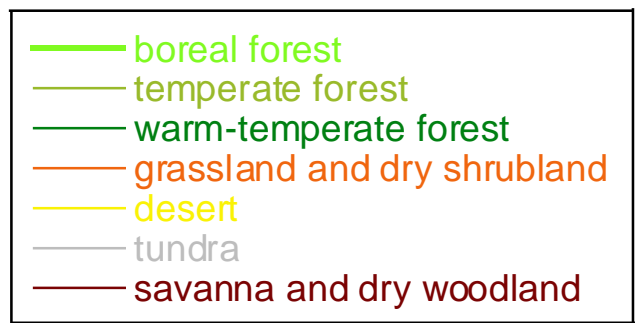

(ai)

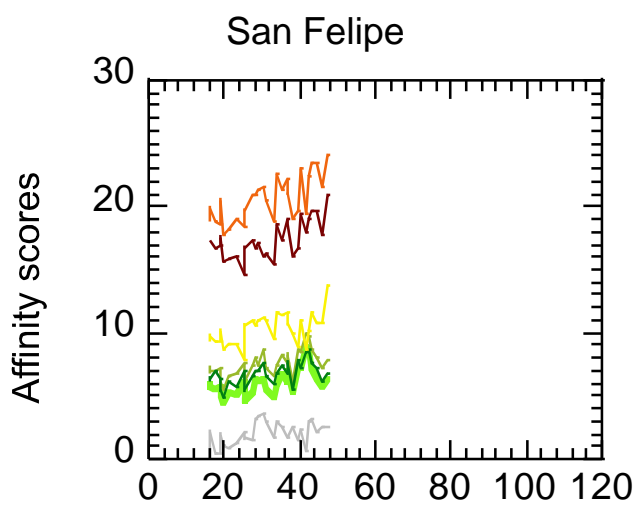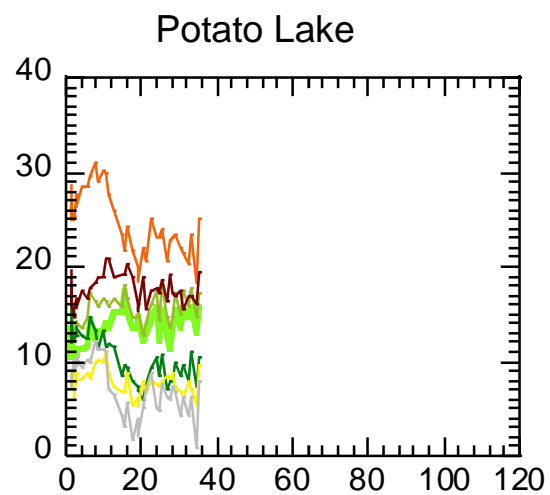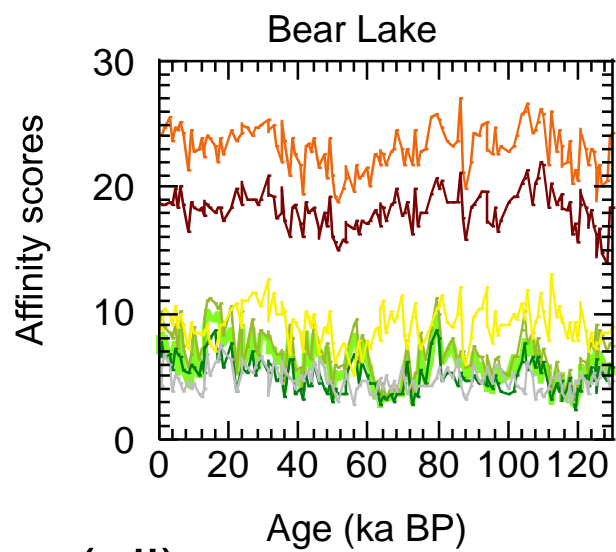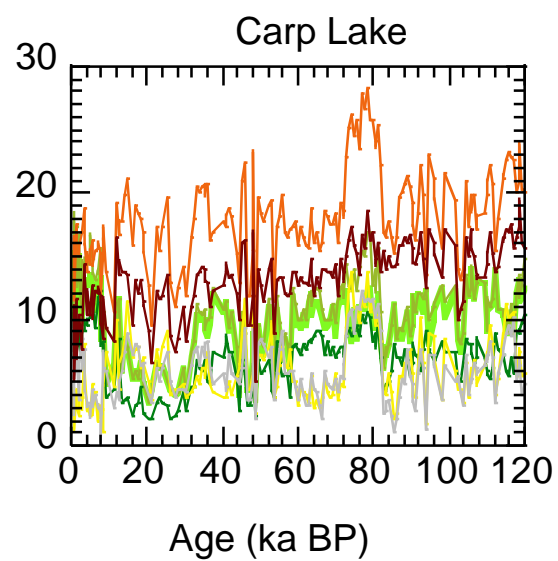

(aii)

Lago Quexil

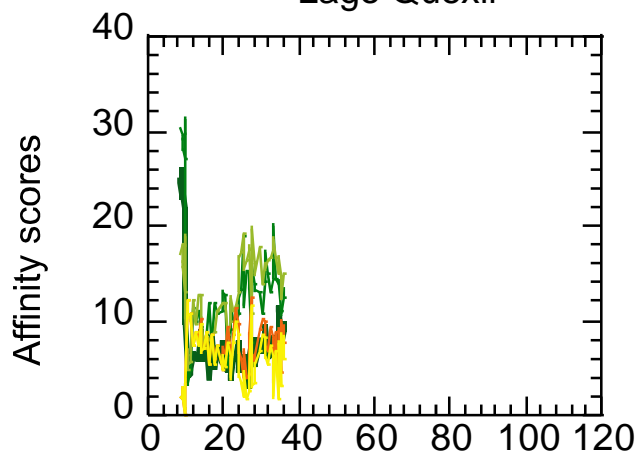

Petén-Itzá

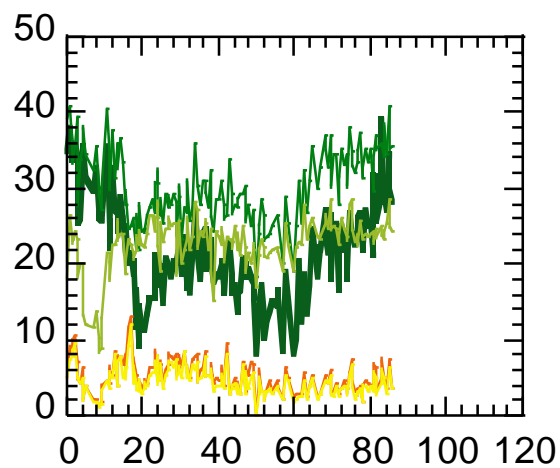

Salitre

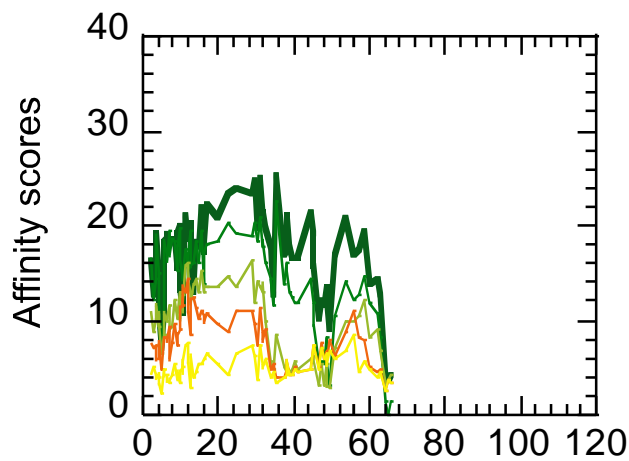

Colonia

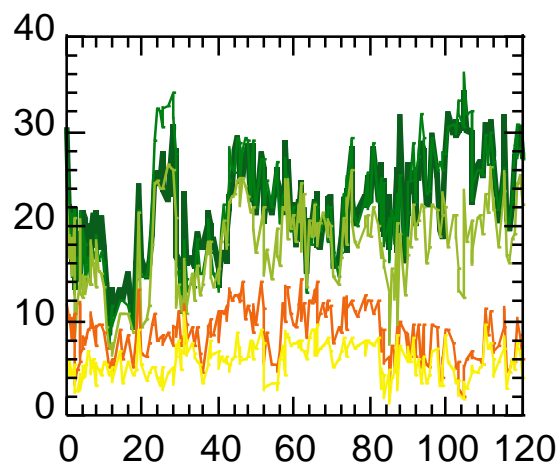

Cambara

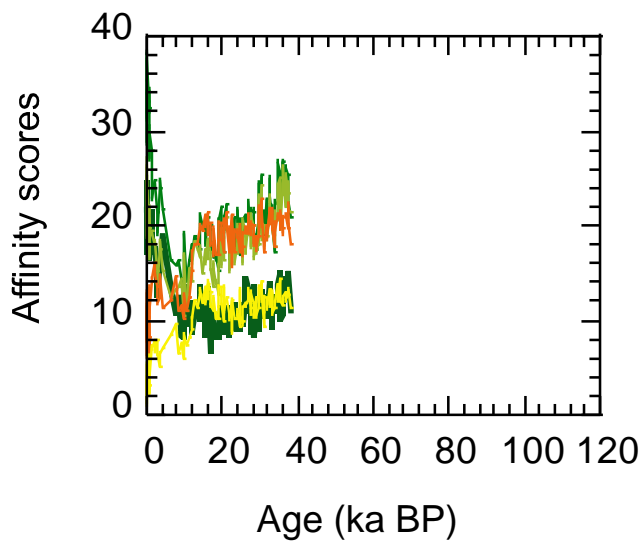

Lake Patzcuaro

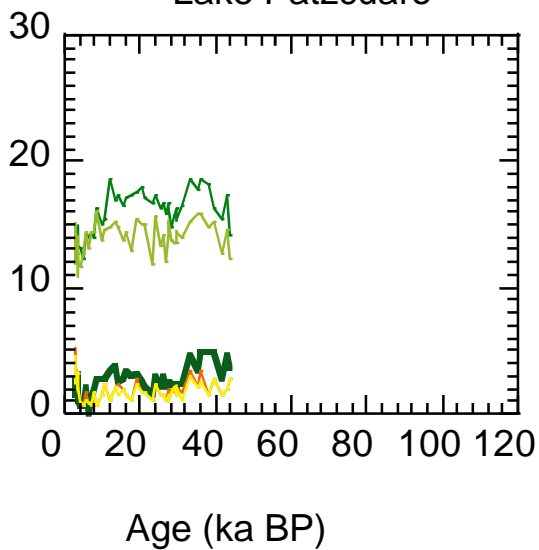

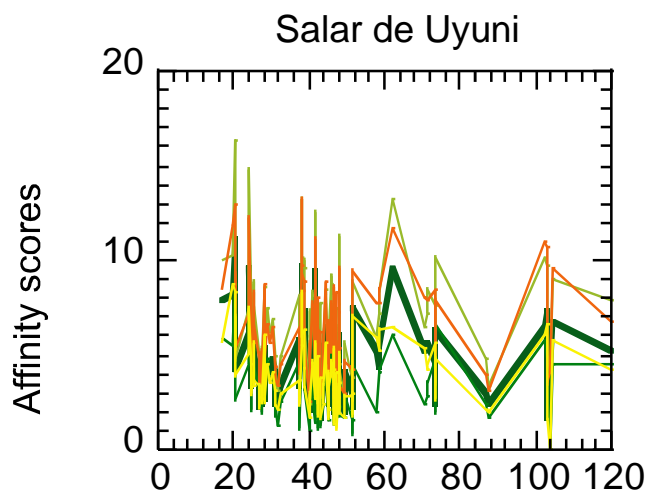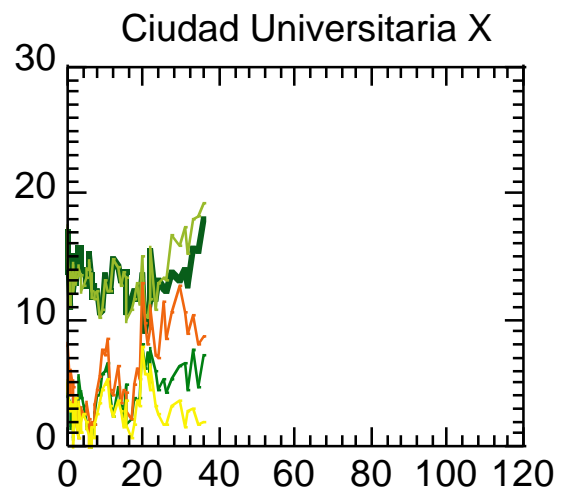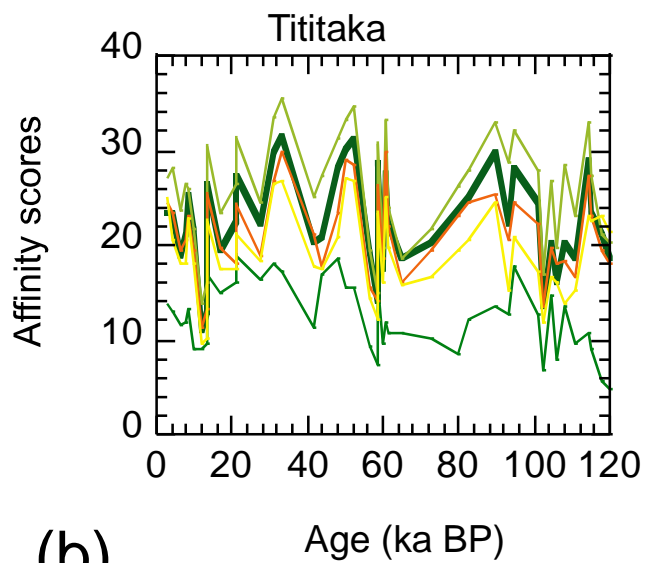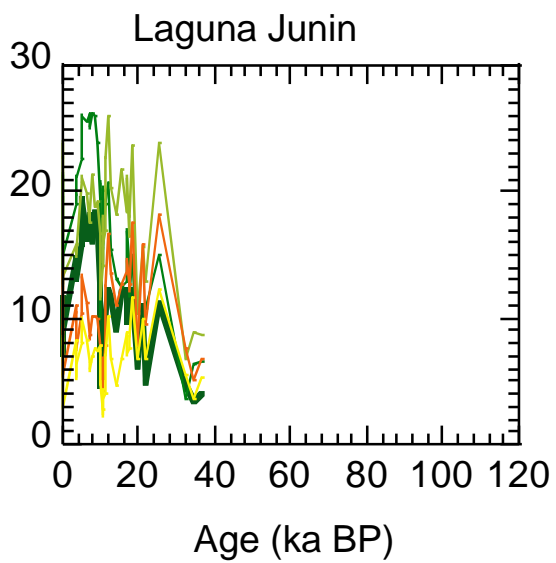

(b)

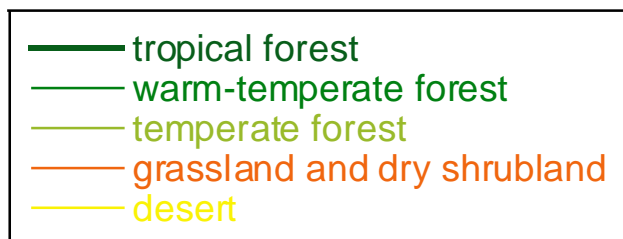

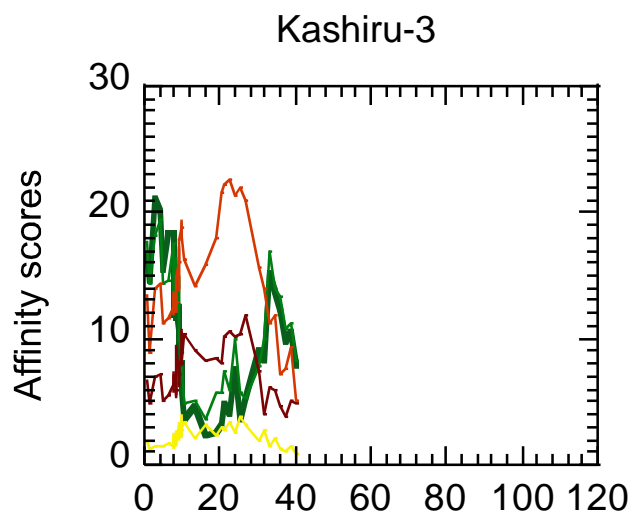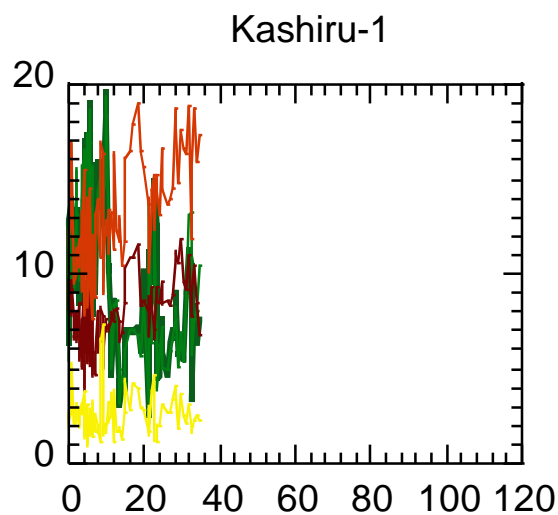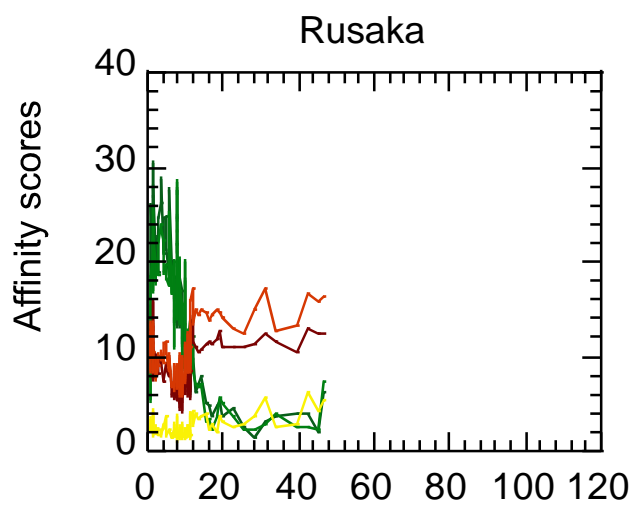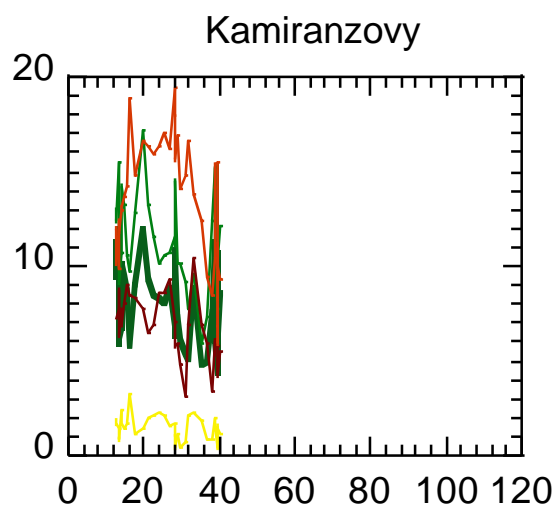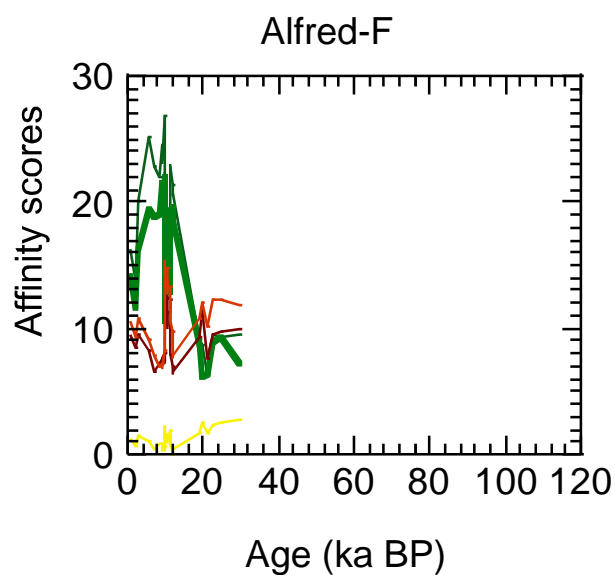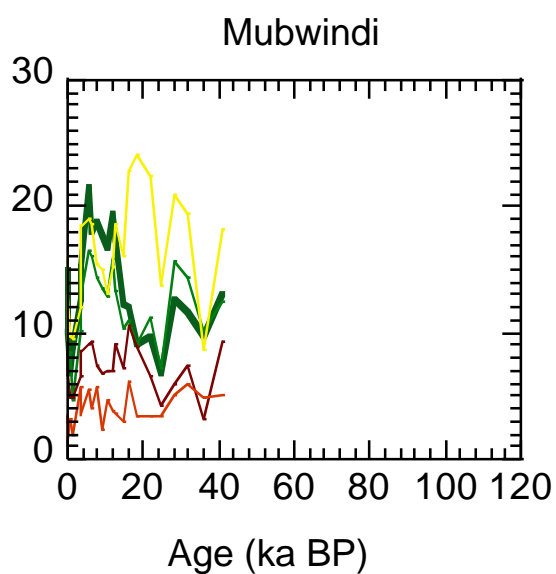

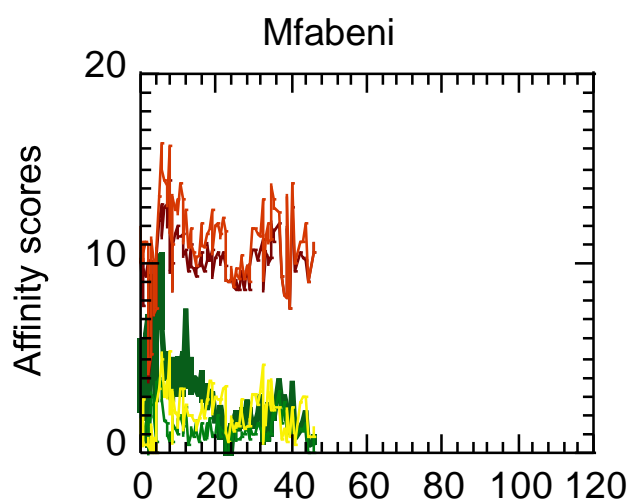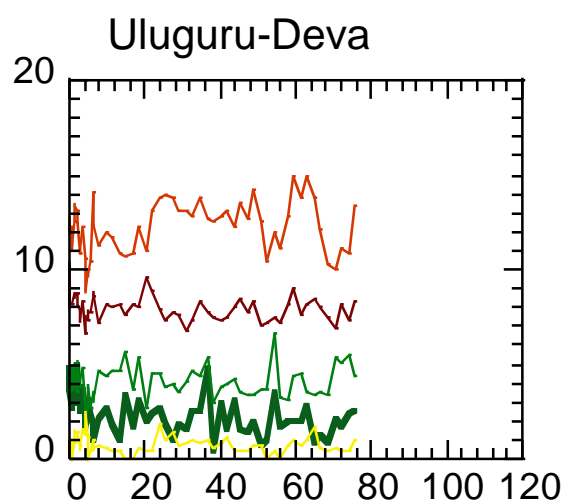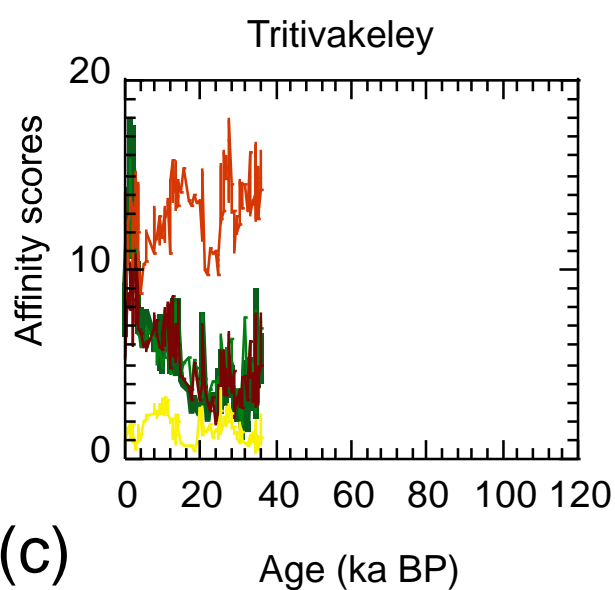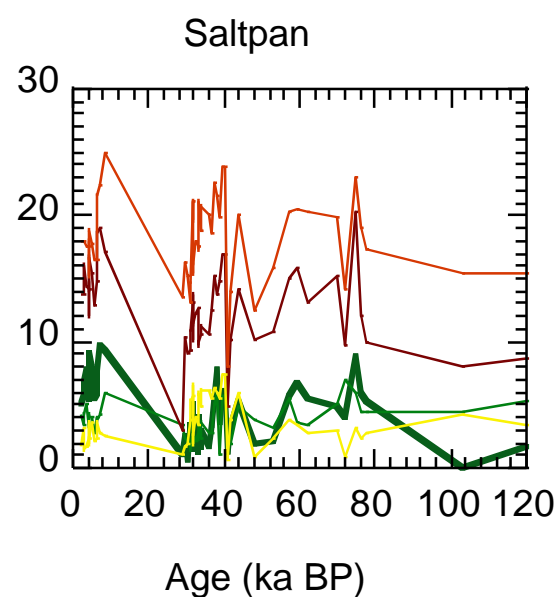

(c)

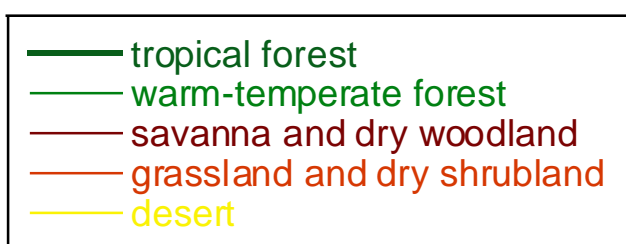

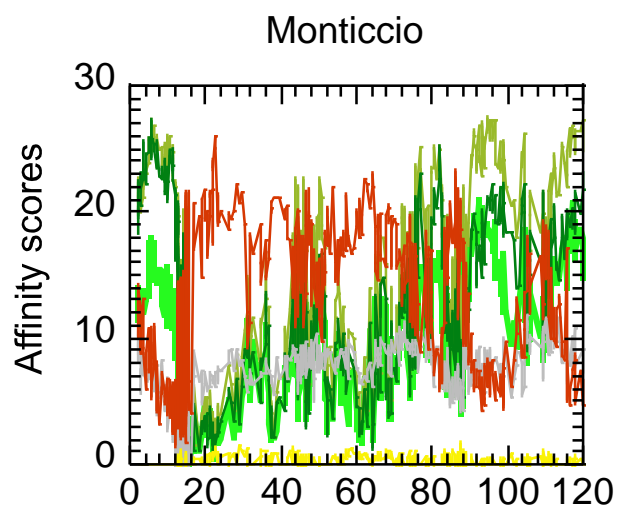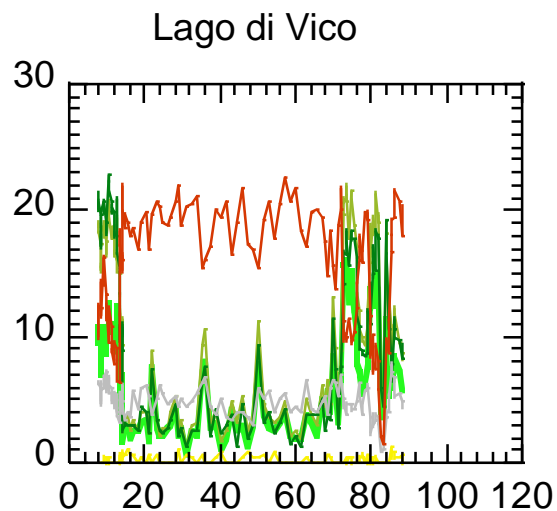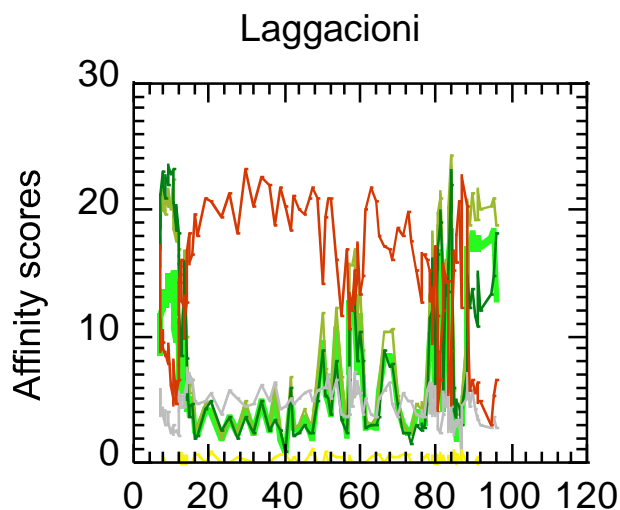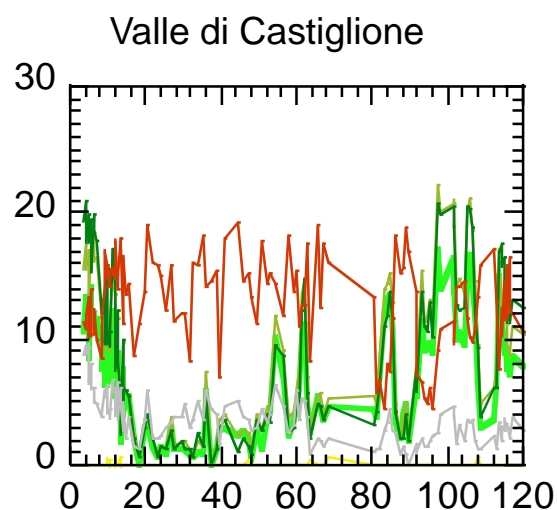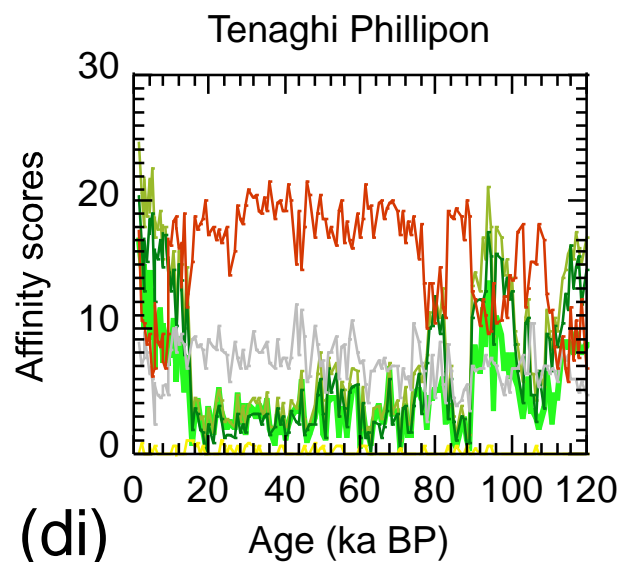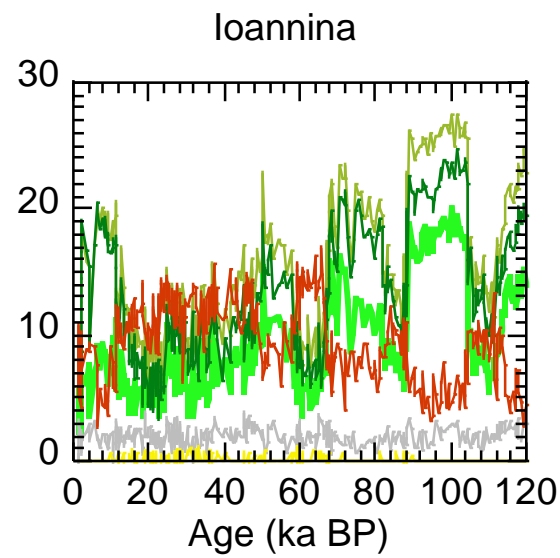

(di)

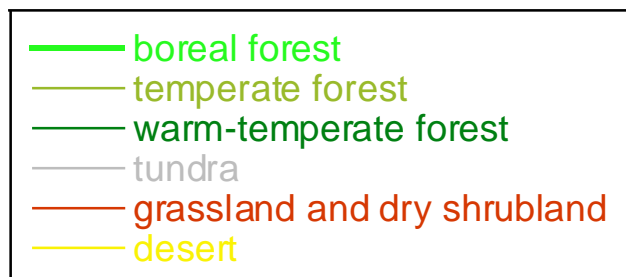

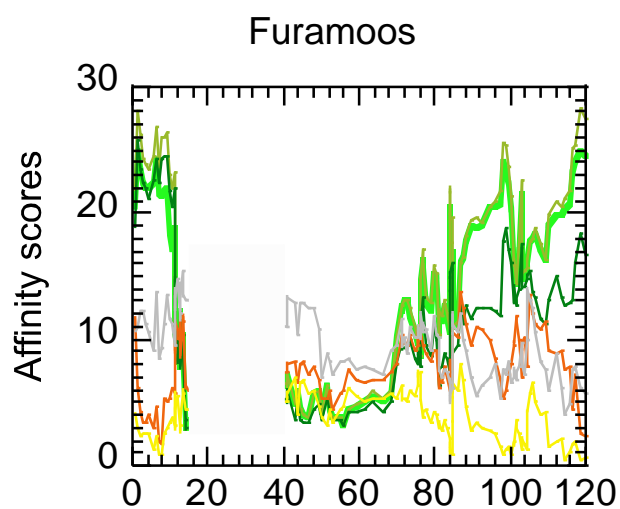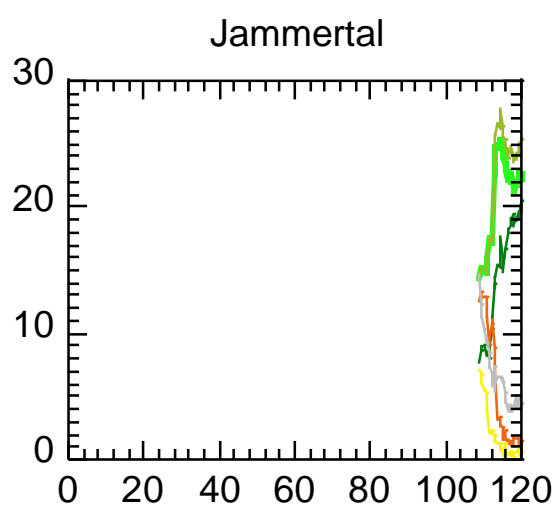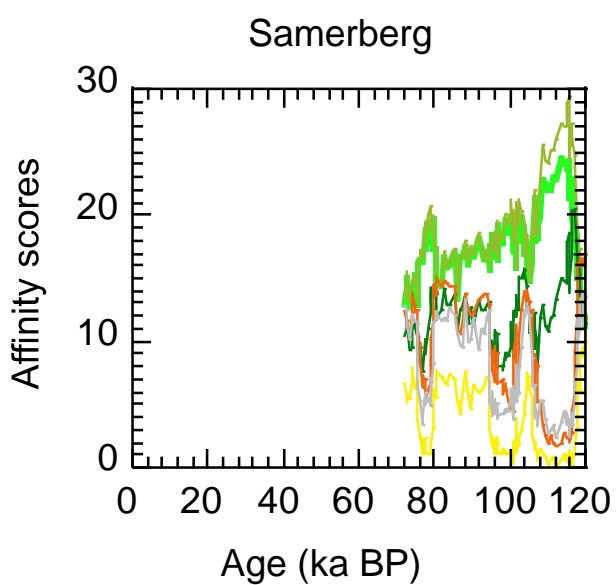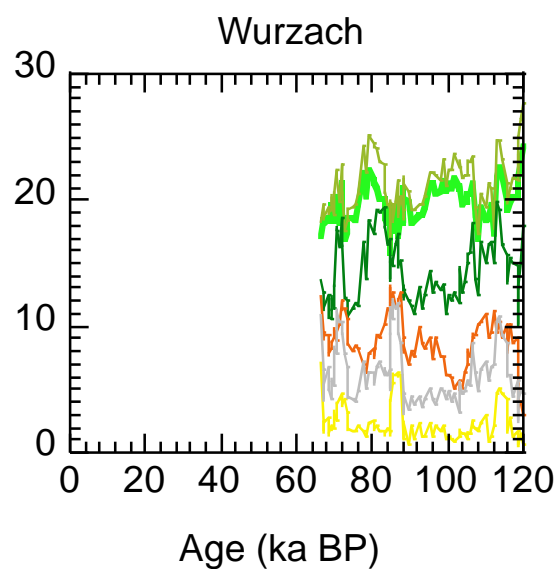

(2dii)

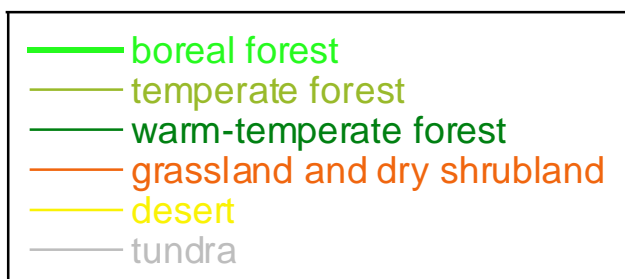

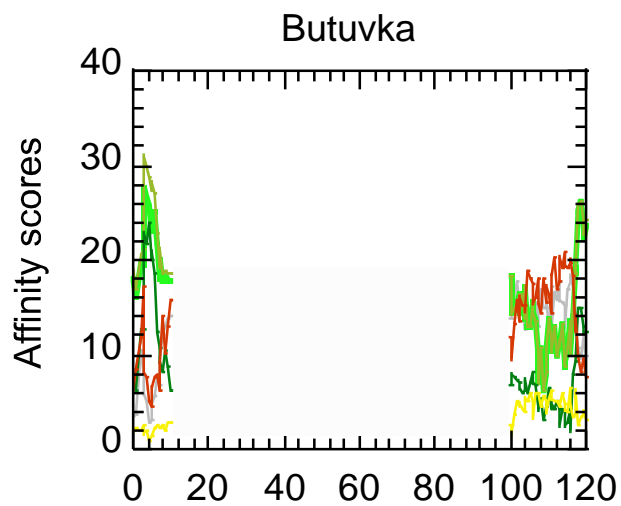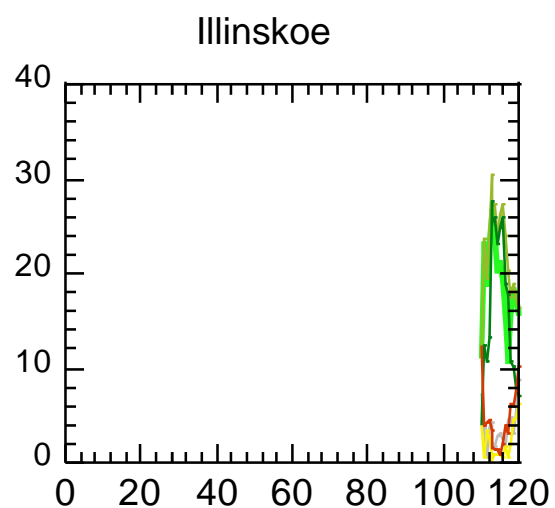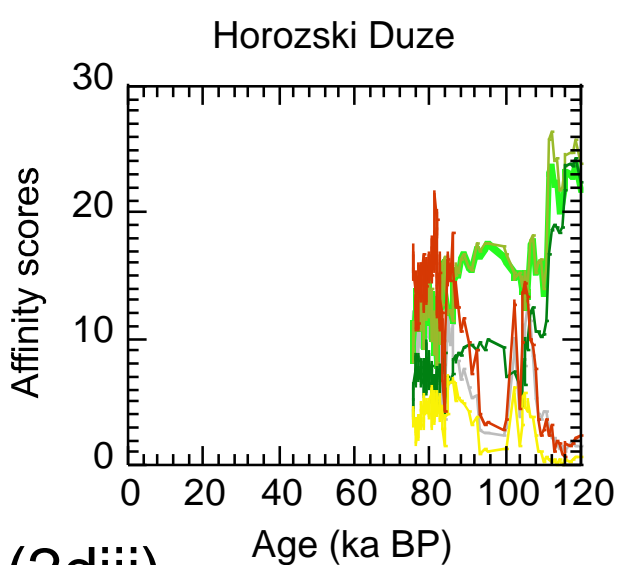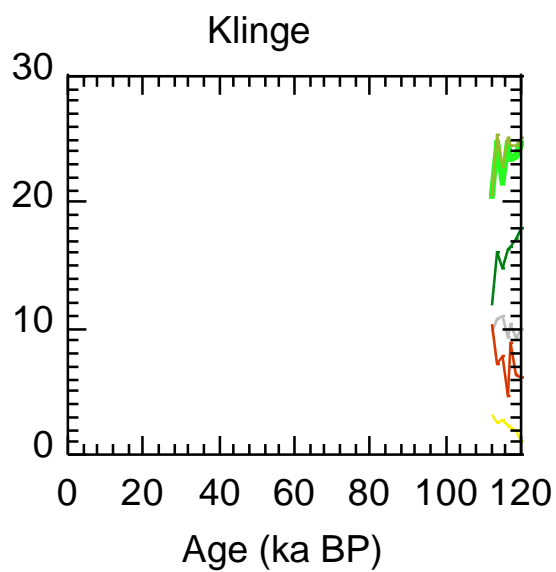

(2diii)

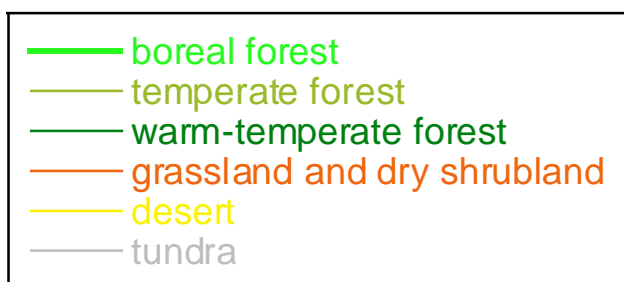

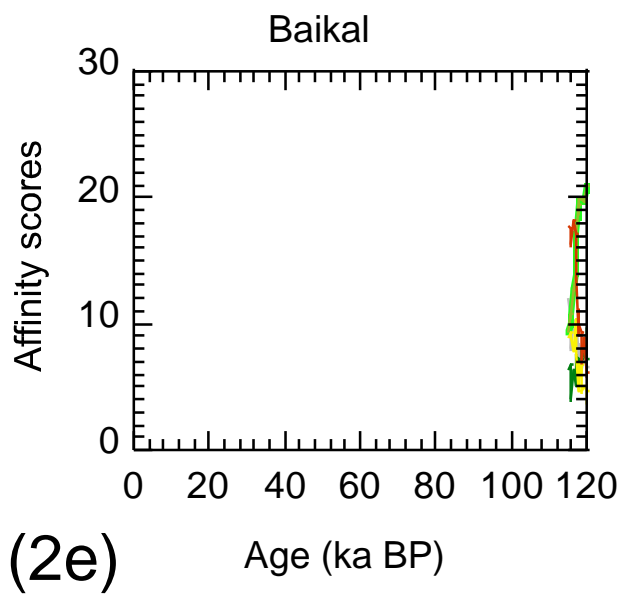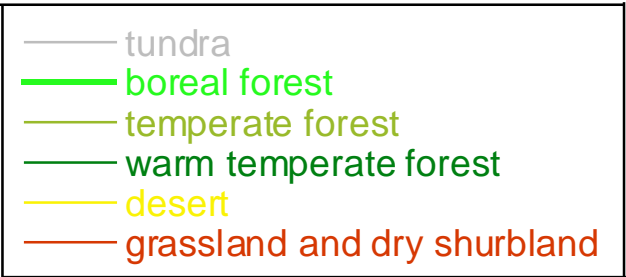

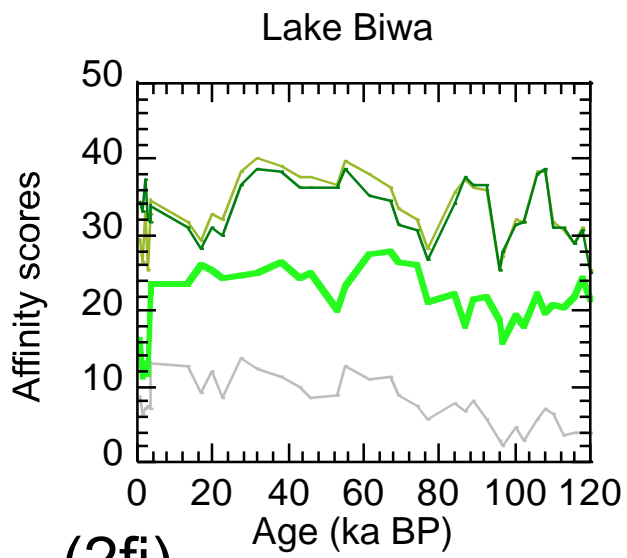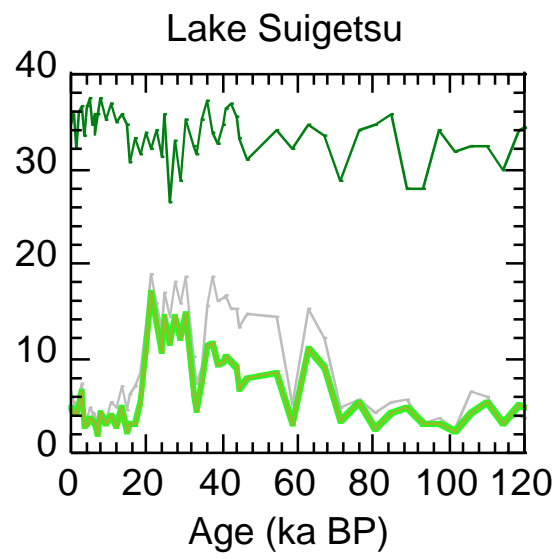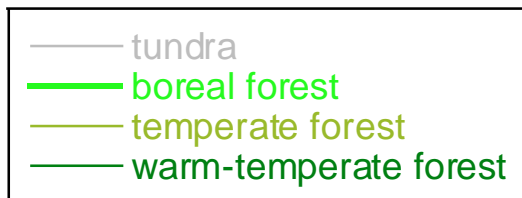

(2fi)

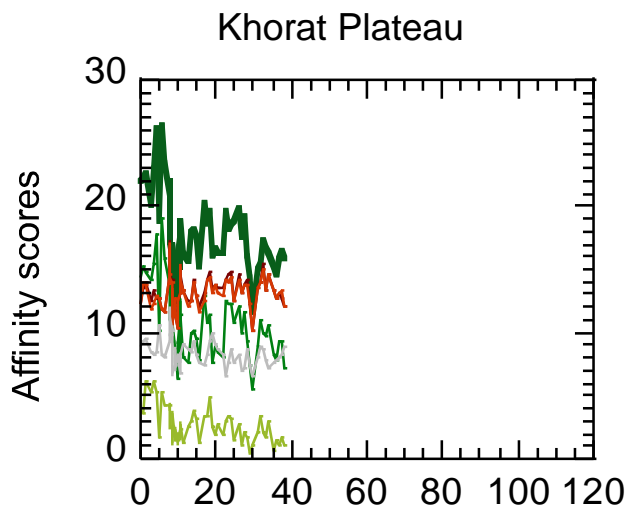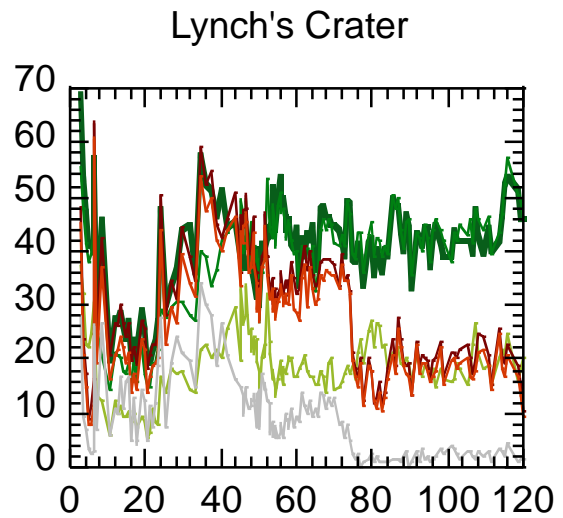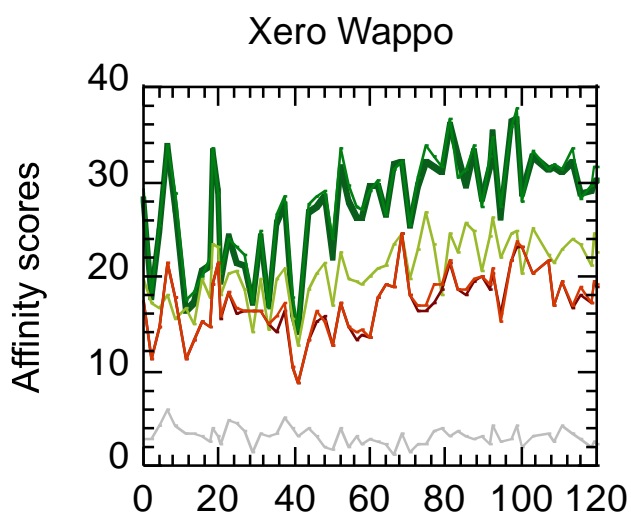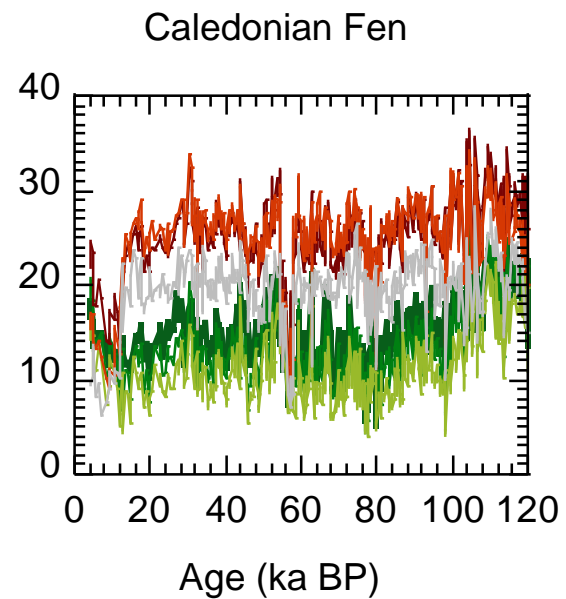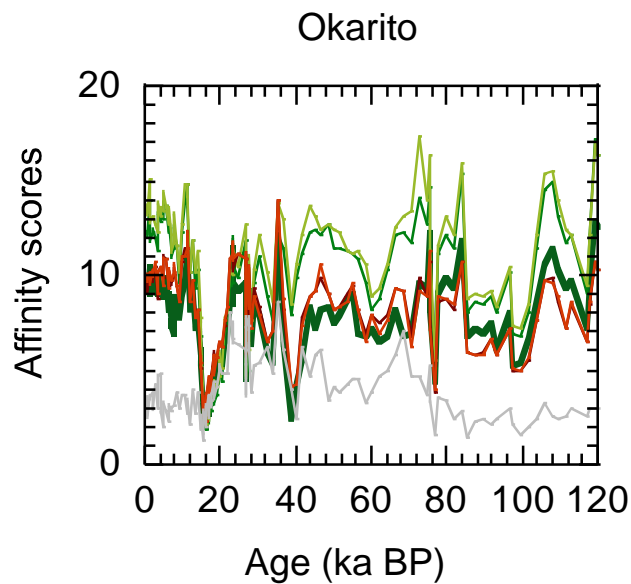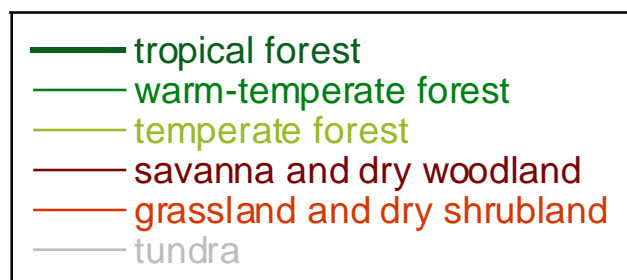

(2fii)

Supplementary Figure 1: Biome affinity scores for the various location. (ai) For Northeast America, using the Williams et al. (2000) biomization scheme, (aia) For North and Northwest America using the Thompson and Anderson (2000) biomization scheme. (2b) For Latin America using the Marchant et al. (2009) biomization scheme. (2c) For Africa using the Elenga et al. (2004) biomization scheme. (2di) For Southern Europe using the Elenga et al. (2004) biomization scheme, (2dii) Alps using the Prentice et al. (1996) biomization scheme, and (2diii) northern Europe using the Tarasov et al. (2000) biomization scheme. (2e) Lake Baikal using the Tarasov et al. (2000) biomization scheme, (2fi) Japan using the Takahara et al. (2000) biomization scheme. (2fii) East Asia/Australasia using the Pickett et al. (2004) biomization scheme.
