# Supplementary material for: Terrestrial biosphere changes over the last 120 kyr
Source: Copernicus journal article supplement (doi:10.5194/cp-12-51-2016), 2016-01-18
Supplement: Supplementary file 1 [file cp-12-51-2016-supplement.zip › supplement/South_America/BiomizationMarchantetal2009.xls]

## Sheet: Cambara
		Plant functional types																												MEGABIOMES
		Graminoid	Mangrove	Tree fern	Tropical broad-leaved evergreen tree	Tropical xeric broad-leved evergreen tree	Tropical rain green tree	Dry tropical rain green tree	Cold temperate conifer	Cool temperate conifer	Maritime evergreen conifer	Eurythermic conifer	Tropical xerophytic tree/shrub	Desert shrub	Xerophytic forb	Tropical forb	Temperate forb	Eurythermic forb	Arctic forb	Cushion forb	Warm temperate evergreen broad-leaved tree	Temperate summer green tree	Temperate evergreen broad-leaved tree	Temperate cool deciduous broad-leaved tree	Temperate cold-deciduous broad-leaved tree	Arctic shrub	Warm temperate conifer	Heath		Tropical rainforest	Tropical seaonal forest	Tropical dry forest	Warm temperate rainforest	Warm temperate evergreen broadleaf forest	Cool temperate rainforest	Warm temperate rainforest	Cool mixed forest	Cool grass-lands	Steppe	Desert	Cool grass shrublands			MEGABIOMES
		g	man	tx	Te1	Te2	Tr1	Tr2	ctc	ctc1	ctc2	ec	txts	ds	df	tf	tef	sf	af	cp	wte	ts	ts1	wte1	wte4	aa	wtc	h		tropical forest	tropical forest	tropical forest	warm-temperate forest	warm-temperate forest	temperate forest	warm-temperate forest	temperate forest	grassland and dry shrubland	grassland and dry shrubland	desert	grassland and dry shrubland			tropical forest	warm-temperate forest	temperate forest	grassland and dry shrubland	desert
Acalypha	Acalypha															1	1													1	1	1	1	1	1	1	1	0	0	0	0			1	1	1	0	0
Alchornea	Alchornea				1			1																						1	1	1	1	1	0	1	0	0	0	0	0			2	2	0	0	0
Alium-tpye																														0	0	0	0	0	0	0	0	0	0	0	0			0	0	0	0	0
Alnus	Alnus																					1		1						0	0	0	0	0	1	1	2	0	0	0	0			0	1	2	0	0
Alophyllus																														0	0	0	0	0	0	0	0	0	0	0	0			0	0	0	0	0
Alstroemeria	Alstroemeria			1																										1	1	0	1	1	1	0	0	0	0	0	0			1	1	1	0	0
Alternanthera	Alternanthera														1			1												0	0	1	0	0	0	0	0	0	1	2	0			1	0	0	1	2
Amaranthaceae/Chenopodiaceae	Amaranthaceae / Chenopodiaceae																	1												0	0	0	0	0	0	0	0	0	1	1	0			0	0	0	1	1
Ambrosia-type	Asteraceae															1		1							1	1		1		1	1	1	0	0	1	0	1	1	1	1	3			1	0	2	4	1
Apiaceae	Apiaceae																1			1										0	0	0	1	1	1	1	1	1	0	0	0			0	1	1	1	0
Apiaceae d p	Apiaceae																1			1										0	0	0	1	1	1	1	1	1	0	0	0			0	1	1	1	0
Araucaria angustifolia	Araucaria augustifolia										1																			0	0	0	1	1	0	0	0	0	0	0	0			0	1	0	0	0
Asteraceae Ligu	Asteraceae															1		1							1	1		1		1	1	1	0	0	1	0	1	1	1	1	3			1	0	2	4	1
Asteraceae-Tub	Asteraceae															1		1							1	1		1		1	1	1	0	0	1	0	1	1	1	1	3			1	0	2	4	1
Baccharis	Baccharis																				1					1				0	0	0	1	1	1	1	1	1	0	0	1			0	1	1	1	0
Borreria gr	Borreria																1	1	1											0	0	0	1	1	1	1	1	1	1	1	1			0	1	1	2	1
Brasicaceae	Brassicaceae															1	1													1	1	1	1	1	1	1	1	0	0	0	0			1	1	1	0	0
Buddeleja	Buddleja																				1			1						0	0	0	1	1	2	1	2	0	0	0	0			0	1	2	0	0
Caryophyllaceae	Caryophyllaceae															1		1	1											1	1	1	0	0	0	0	0	1	1	1	1			1	0	0	2	1
Cecropia	Cecropia				1	1																								2	1	0	1	0	0	0	0	0	0	0	0			2	1	0	0	0
Celtis	Celtis				1	1																								2	1	0	1	0	0	0	0	0	0	0	0			2	1	0	0	0
cf Prockia	Flacourtiaceae				1																									1	0	0	1	0	0	0	0	0	0	0	0			1	1	0	0	0
Clethra	Clethra																							1	1					0	0	0	0	0	1	0	2	0	0	0	1			0	0	2	1	0
Clusia criuva	Clusia												1								1									0	0	1	1	1	1	1	1	0	0	0	0			1	1	1	0	0
Cressa-type																														0	0	0	0	0	0	0	0	0	0	0	0			0	0	0	0	0
Croton	Croton					1															1									1	1	0	1	1	1	1	1	0	0	0	0			1	1	1	0	0
Cuphea	Cuphea							1					1																	0	1	2	0	1	0	1	0	0	0	0	0			2	1	0	0	0
Cyathea	Cyathea			1																										1	1	0	1	1	1	0	0	0	0	0	0			1	1	1	0	0
Cyperaceae																														0	0	0	0	0	0	0	0	0	0	0	0			0	0	0	0	0
Daphnopsis	Daphnopsis																				1			1						0	0	0	1	1	2	1	2	0	0	0	0			0	1	2	0	0
Dicksonia sellowiana	Dicksonia			1																										1	1	0	1	1	1	0	0	0	0	0	0			1	1	1	0	0
Didymopanax	Didymopanax					1	1	1																						1	3	1	1	1	0	1	0	0	0	0	0			3	2	0	0	0
Dodanea	Dodonaea												1											1	1					0	0	1	0	0	1	0	2	0	0	0	1			1	0	2	1	0
Drymis	Drimys																							1						0	0	0	0	0	1	0	1	0	0	0	0			0	0	1	0	0
Echinodorus	Echinodorus												1																	0	0	1	0	0	0	0	0	0	0	0	0			1	0	0	0	0
Eichhornia	Eichhornia												1																	0	0	1	0	0	0	0	0	0	0	0	0			1	0	0	0	0
Ephedra large	Ephedra													1	1											1				0	0	1	0	0	0	0	0	1	0	1	1			1	0	0	1	1
Ephedra small	Ephedra													1	1											1				0	0	1	0	0	0	0	0	1	0	1	1			1	0	0	1	1
Ericaceae	Ericaceae																							1	1	1		1		0	0	0	0	0	2	0	2	1	0	0	3			0	0	3	3	0
Eriocaulon	Eriocaulaceae Eriocaulon																		1											0	0	0	0	0	0	0	0	1	0	0	1			0	0	0	1	0
Eryngium	Eryngium							1										1												0	1	1	0	1	0	1	0	0	1	1	0			1	1	0	1	1
Euphorbia	Euphorbia															1	1	1												1	1	1	1	1	1	1	1	0	1	1	0			1	1	1	1	1
Euterpe/Geonoma	Euterpe				1		1	1													1									1	2	1	3	2	1	2	1	0	0	0	0			3	4	1	0	0
Fabacae I	Fabaceae															1	1	1												1	1	1	1	1	1	1	1	0	1	1	0			1	1	1	1	1
Fabaceae II	Fabaceae															1	1	1												1	1	1	1	1	1	1	1	0	1	1	0			1	1	1	1	1
Gomphrena/Pfaffia-type	Gomphorena															1		1												1	1	1	0	0	0	0	0	0	1	1	0			1	0	0	1	1
Hedyosmum	Hedyosmum																				1			1						0	0	0	1	1	2	1	2	0	0	0	0			0	1	2	0	0
Hydrocotyle	Hydrocotyle																1	1	1											0	0	0	1	1	1	1	1	1	1	1	1			0	1	1	2	1
Hyeronima	Euphorbiaceae															1	1	1												1	1	1	1	1	1	1	1	0	1	1	0			1	1	1	1	1
Ilex	Ilex				1	1																								2	1	0	1	0	0	0	0	0	0	0	0			2	1	0	0	0
Iridaceae	Iridaceae																1	1	1											0	0	0	1	1	1	1	1	1	1	1	1			0	1	1	2	1
Iridaceae ret	Iridaceae																1	1	1											0	0	0	1	1	1	1	1	1	1	1	1			0	1	1	2	1
Jungia-type	Jungia																1	1												0	0	0	1	1	1	1	1	0	1	1	0			0	1	1	1	1
Lamanonia speciosa-type	Lamanonia																1													0	0	0	1	1	1	1	1	0	0	0	0			0	1	1	0	0
Linum																														0	0	0	0	0	0	0	0	0	0	0	0			0	0	0	0	0
Ludwigia	Ludwigia																				1			1						0	0	0	1	1	2	1	2	0	0	0	0			0	1	2	0	0
Luehea	Luehea																				1	1	1							0	0	0	1	1	1	2	2	0	0	0	0			0	2	2	0	0
Malpighiaceae	Malpighiaceae				1		1						1								1									1	1	1	3	1	1	1	1	0	0	0	0			3	3	1	0	0
Malvaceae	malvaceae						1	1									1													0	2	1	2	2	1	2	1	0	0	0	0			2	3	1	0	0
Matayba	Matayba				1																1									1	0	0	2	1	1	1	1	0	0	0	0			1	2	1	0	0
Melastomataceae	Melastomataceae				1	1		1													1									2	2	1	2	2	1	2	1	0	0	0	0			3	3	1	0	0
Meliosma	Meliosma																							1						0	0	0	0	0	1	0	1	0	0	0	0			0	0	1	0	0
Mimosa - III	Mimosa							1													1									0	1	1	1	2	1	2	1	0	0	0	0			1	2	1	0	0
Mimosa indet	Mimosa							1													1									0	1	1	1	2	1	2	1	0	0	0	0			1	2	1	0	0
Mimosa kl 16	Mimosa							1													1									0	1	1	1	2	1	2	1	0	0	0	0			1	2	1	0	0
Mimosa kl 8	Mimosa							1													1									0	1	1	1	2	1	2	1	0	0	0	0			1	2	1	0	0
Mimosa p4 sk ver	Mimosa							1													1									0	1	1	1	2	1	2	1	0	0	0	0			1	2	1	0	0
Mimosa scabrella-type	Mimosa cf. M. scabrella																				1									0	0	0	1	1	1	1	1	0	0	0	0			0	1	1	0	0
Mimosa taimbensis-type	Mimosa cf M.taimbensis												1																	0	0	1	0	0	0	0	0	0	0	0	0			1	0	0	0	0
Monnina																														0	0	0	0	0	0	0	0	0	0	0	0			0	0	0	0	0
Moraceae/Urticaceae	Moraceae				1	1																								2	1	0	1	0	0	0	0	0	0	0	0			2	1	0	0	0
Moritzia dasiantha	Moritzia-type																1		1											0	0	0	1	1	1	1	1	1	0	0	1			0	1	1	1	0
Myriophyllum																														0	0	0	0	0	0	0	0	0	0	0	0			0	0	0	0	0
Myrsine	Myrsin				1																									1	0	0	1	0	0	0	0	0	0	0	0			1	1	0	0	0
Myrtaceae	Myrtaceae				1	1																		1						2	1	0	1	0	1	0	1	0	0	0	0			2	1	1	0	0
Ocotea	Ocotea-type				1	1	1																							2	2	0	2	0	0	0	0	0	0	0	0			3	2	0	0	0
Oxalis	Oxalis																	1	1											0	0	0	0	0	0	0	0	1	1	1	1			0	0	0	2	1
Pamphalea	Pamphalea																1													0	0	0	1	1	1	1	1	0	0	0	0			0	1	1	0	0
Parapiptadenia																														0	0	0	0	0	0	0	0	0	0	0	0			0	0	0	0	0
Pavonia-Malvastrum-type																														0	0	0	0	0	0	0	0	0	0	0	0			0	0	0	0	0
Pera	Pera						1	1																						0	2	1	1	1	0	1	0	0	0	0	0			2	2	0	0	0
Phrygilanthus acutifolius																														0	0	0	0	0	0	0	0	0	0	0	0			0	0	0	0	0
Pinus	Pinus									1																	1			0	0	0	1	1	1	1	1	0	0	0	0			0	1	1	0	0
Piper	Piper						1	1																						0	2	1	1	1	0	1	0	0	0	0	0			2	2	0	0	0
Plantago australis-type	Plantago																1	1	1	1										0	0	0	1	1	1	1	1	2	1	1	1			0	1	1	3	1
Plantago turficola	Plantago																1	1	1	1										0	0	0	1	1	1	1	1	2	1	1	1			0	1	1	3	1
Poaceae	Poaceae	1																												0	0	0	0	0	0	0	0	0	0	0	0			0	0	0	0	0
Podocarpus	Podocarpus									1	1																			0	0	0	1	1	1	0	1	0	0	0	0			0	1	1	0	0
Polygala	Polygala												1			1	1													1	1	2	1	1	1	1	1	0	0	0	0			2	1	1	0	0
Polygonum																														0	0	0	0	0	0	0	0	0	0	0	0			0	0	0	0	0
Potamogeton																														0	0	0	0	0	0	0	0	0	0	0	0			0	0	0	0	0
Prockia curis-type	Flacourtiaceae				1																									1	0	0	1	0	0	0	0	0	0	0	0			1	1	0	0	0
Ranunculus bonariensis-type	Ranunculaceae																1	1												0	0	0	1	1	1	1	1	0	1	1	0			0	1	1	1	1
Rebunium	Relbunium																		1											0	0	0	0	0	0	0	0	1	0	0	1			0	0	0	1	0
Rhamnus-type	Rhamnaceae							1					1																	0	1	2	0	1	0	1	0	0	0	0	0			2	1	0	0	0
Roupala	Roupala																				1			1						0	0	0	1	1	2	1	2	0	0	0	0			0	1	2	0	0
Sagittaria	Alismataceae															1														1	1	1	0	0	0	0	0	0	0	0	0			1	0	0	0	0
Salix humboldtiana-type	Salix						1	1																						0	2	1	1	1	0	1	0	0	0	0	0			2	2	0	0	0
Salvia-type sm	Lamiaceae															1	1	1	1											1	1	1	1	1	1	1	1	1	1	1	1			1	1	1	2	1
Sapium	Sapium						1	1					1																	0	2	2	1	1	0	1	0	0	0	0	0			3	2	0	0	0
Schinus-type	Schinus							1					1																	0	1	2	0	1	0	1	0	0	0	0	0			2	1	0	0	0
Scutellaria-type	Scutellaria-type																	1	1											0	0	0	0	0	0	0	0	1	1	1	1			0	0	0	2	1
Sebastiana brasiliensis	Sebastiana												1																	0	0	1	0	0	0	0	0	0	0	0	0			1	0	0	0	0
Sebastiania commersionia	Sebastiana												1																	0	0	1	0	0	0	0	0	0	0	0	0			1	0	0	0	0
Senecio-type	Senecio																									1				0	0	0	0	0	0	0	0	1	0	0	1			0	0	0	1	0
Solanum	Solanaceae				1								1								1			1						1	0	1	2	1	2	1	2	0	0	0	0			2	2	2	0	0
Spermacoce	Rubiaceae				1		1									1	1	1	1											2	2	1	3	1	1	1	1	1	1	1	1			3	3	1	2	1
Struthanthus	Strutanthus				1	1																								2	1	0	1	0	0	0	0	0	0	0	0			2	1	0	0	0
Stryax	Styrax							1														1	1							0	1	1	0	1	0	2	1	0	0	0	0			1	2	1	0	0
Symplocus tect	Symplocos						1	1																						0	2	1	1	1	0	1	0	0	0	0	0			2	2	0	0	0
Tetrochidium rubrivenium	Tetrochiduim				1																1				1					1	0	0	2	1	1	1	2	0	0	0	1			1	2	2	1	0
Trema-type	Trema						1	1														1	1							0	2	1	1	1	0	2	1	0	0	0	0			2	3	1	0	0
Trichocline	Asteraceae															1		1							1	1		1		1	1	1	0	0	1	0	1	1	1	1	3			1	0	2	4	1
Trixis	Trixis												1																	0	0	1	0	0	0	0	0	0	0	0	0			1	0	0	0	0
Typha																														0	0	0	0	0	0	0	0	0	0	0	0			0	0	0	0	0
Utricularia																														0	0	0	0	0	0	0	0	0	0	0	0			0	0	0	0	0
Valeriana	Valeriana																		1											0	0	0	0	0	0	0	0	1	0	0	1			0	0	0	1	0
Verbena-type	Verbena															1														1	1	1	0	0	0	0	0	0	0	0	0			1	0	0	0	0
Vernonia	Vernonia															1	1													1	1	1	1	1	1	1	1	0	0	0	0			1	1	1	0	0
Vicea/Lathyrus	Euphorbiaceae															1	1	1												1	1	1	1	1	1	1	1	0	1	1	0			1	1	1	1	1
Weinmannia	Weinmannia																				1			1	1					0	0	0	1	1	2	1	3	0	0	0	1			0	1	3	1	0
Xyris	Xyris														1		1	1												0	0	1	1	1	1	1	1	0	1	2	0			1	1	1	1	2
Zanthoxylum	Zanthoxylum						1	1																						0	2	1	1	1	0	1	0	0	0	0	0			2	2	0	0	0
[truncated: 11 more columns]

## Sheet: Colonia
		Plant functional types																												BIOMES
		Graminoid	Mangrove	Tree fern	Tropical broad-leaved evergreen tree	Tropical xeric broad-leved evergreen tree	Tropical rain green tree	Dry tropical rain green tree	Cold temperate conifer	Cool temperate conifer	Maritime evergreen conifer	Eurythermic conifer	Tropical xerophytic tree/shrub	Desert shrub	Xerophytic forb	Tropical forb	Temperate forb	Eurythermic forb	Arctic forb	Cushion forb	Warm temperate evergreen broad-leaved tree	Temperate summer green tree	Temperate evergreen broad-leaved tree	Temperate cool deciduous broad-leaved tree	Temperate cold-deciduous broad-leaved tree	Arctic shrub	Warm temperate conifer	Heath		Tropical rainforest	Tropical seaonal forest	Tropical dry forest	Warm temperate rainforest	Warm temperate evergreen broadleaf forest	Cool temperate rainforest	Warm temperate rainforest	Cool mixed forest	Cool grass-lands	Steppe	Desert	Cool grass shrublands			MEGABIOMES
		g	man	tx	Te1	Te2	Tr1	Tr2	ctc	ctc1	ctc2	ec	txts	ds	df	tf	tef	sf	af	cp	wte	ts	ts1	wte1	wte4	aa	wtc	h		TRFO	TSFO	TDFO	WTRF	WEFO	CRTF	WAMF	COMI	CGSS	STEP	DESE	CGSH			tropical forest	warm-temperate forest	temperate forest	grassland and dry shrubland	desert
Acalypha	Acalypha															1	1													1	1	1	1	1	1	1	1	0	0	0	0			1	1	1	0	0
Alchornea	Alchornea				1			1																						1	1	1	1	1	0	1	0	0	0	0	0			2	2	0	0	0
Alismatac	Alismataceae															1														1	1	1	0	0	0	0	0	0	0	0	0			1	0	0	0	0
Andira	Andira-type						1	1																						0	2	1	1	1	0	1	0	0	0	0	0			2	2	0	0	0
Antodon	Asteraceae															1		1							1	1		1		1	1	1	0	0	1	0	1	1	1	1	3			1	0	2	4	1
Apocynac	Apocynaceae				1	1		1																						2	2	1	1	1	0	1	0	0	0	0	0			3	2	0	0	0
Apuleia	Asteraceae															1		1							1	1		1		1	1	1	0	0	1	0	1	1	1	1	3			1	0	2	4	1
Arac	Araucaria										1																1			0	0	0	2	2	0	1	0	0	0	0	0			0	2	0	0	0
Araucaria	Araucaria										1																1			0	0	0	2	2	0	1	0	0	0	0	0			0	2	0	0	0
Arecac C1	Arecaceae				1																			1						1	0	0	1	0	1	0	1	0	0	0	0			1	1	1	0	0
Arrabidea	Arrabidaea				1								1																	1	0	1	1	0	0	0	0	0	0	0	0			2	1	0	0	0
Astera lig	Asteraceae															1		1							1	1		1		1	1	1	0	0	1	0	1	1	1	1	3			1	0	2	4	1
Asterac tub	Asteraceae															1		1							1	1		1		1	1	1	0	0	1	0	1	1	1	1	3			1	0	2	4	1
Banara	Banara																							1						0	0	0	0	0	1	0	1	0	0	0	0			0	0	1	0	0
Bauhinia	Bauhinia						1	1													1									0	2	1	2	2	1	2	1	0	0	0	0			2	3	1	0	0
Begonia	Begonia															1														1	1	1	0	0	0	0	0	0	0	0	0			1	0	0	0	0
Belangera	Cunoniaceae				1																									1	0	0	1	0	0	0	0	0	0	0	0			1	1	0	0	0
Botryococ																														0	0	0	0	0	0	0	0	0	0	0	0			0	0	0	0	0
Bromeliac	Bromeliaceae															1	1		1											1	1	1	1	1	1	1	1	1	0	0	1			1	1	1	1	0
C5 myrsine	Myrsin				1																									1	0	0	1	0	0	0	0	0	0	0	0			1	1	0	0	0
Caesalp	Caesalpinea						1	1																						0	2	1	1	1	0	1	0	0	0	0	0			2	2	0	0	0
Casearia	Flacourtiaceae				1																									1	0	0	1	0	0	0	0	0	0	0	0			1	1	0	0	0
Casearia C4P4	Flacourtiaceae				1																									1	0	0	1	0	0	0	0	0	0	0	0			1	1	0	0	0
Cassia	Cassia															1	1													1	1	1	1	1	1	1	1	0	0	0	0			1	1	1	0	0
Cecropia	Cecropia				1	1																								2	1	0	1	0	0	0	0	0	0	0	0			2	1	0	0	0
Cedrela	Cedrela				1	1																								2	1	0	1	0	0	0	0	0	0	0	0			2	1	0	0	0
Celtis	Celtis				1	1																								2	1	0	1	0	0	0	0	0	0	0	0			2	1	0	0	0
cf Anthoceros	Antheroceros															1		1												1	1	1	0	0	0	0	0	0	1	1	0			1	0	0	1	1
Chamaesyce	Euphorbiaceae															1	1	1												1	1	1	1	1	1	1	1	0	1	1	0			1	1	1	1	1
Chrysophyllumt(Apiac)	Chrysophyllum							1					1																	0	1	2	0	1	0	1	0	0	0	0	0			2	1	0	0	0
Clethra	Clethra																							1	1					0	0	0	0	0	1	0	2	0	0	0	1			0	0	2	1	0
Cordia	Cordia							1					1																	0	1	2	0	1	0	1	0	0	0	0	0			2	1	0	0	0
Coussapoa																														0	0	0	0	0	0	0	0	0	0	0	0			0	0	0	0	0
Croton	Croton					1															1									1	1	0	1	1	1	1	1	0	0	0	0			1	1	1	0	0
Cyathea t. 2	Cyathea			1																										1	1	0	1	1	1	0	0	0	0	0	0			1	1	1	0	0
Cybistax	Bignoniaceae				1																									1	0	0	1	0	0	0	0	0	0	0	0			1	1	0	0	0
Cyperac																														0	0	0	0	0	0	0	0	0	0	0	0			0	0	0	0	0
Dalbergia	Dalbergia				1	1																								2	1	0	1	0	0	0	0	0	0	0	0			2	1	0	0	0
Daphnopsis	Daphnopsis																				1			1						0	0	0	1	1	2	1	2	0	0	0	0			0	1	2	0	0
Desmodium	Leguminoseae/Fabaceae				1	1	1																							2	2	0	2	0	0	0	0	0	0	0	0			3	2	0	0	0
Dicksonia	Dicksonia			1																										1	1	0	1	1	1	0	0	0	0	0	0			1	1	1	0	0
Didymopanax	Didymopanax					1	1	1																						1	3	1	1	1	0	1	0	0	0	0	0			3	2	0	0	0
Dorstenia	Moraceae				1	1																								2	1	0	1	0	0	0	0	0	0	0	0			2	1	0	0	0
Drimys	Drimys																							1						0	0	0	0	0	1	0	1	0	0	0	0			0	0	1	0	0
Ephedra	Ephedra													1	1											1				0	0	1	0	0	0	0	0	1	0	1	1			1	0	0	1	1
Ericac	Ericaceae																							1	1	1		1		0	0	0	0	0	2	0	2	1	0	0	3			0	0	3	3	0
Eriocaulon	Eriocaulaceae Eriocaulon																		1											0	0	0	0	0	0	0	0	1	0	0	1			0	0	0	1	0
Eryngium	Eryngium							1										1												0	1	1	0	1	0	1	0	0	1	1	0			1	1	0	1	1
Euphorbia	Euphorbia															1	1	1												1	1	1	1	1	1	1	1	0	1	1	0			1	1	1	1	1
Fabac	Fabaceae															1	1	1												1	1	1	1	1	1	1	1	0	1	1	0			1	1	1	1	1
Flacourt C4P4	Flacourtiaceae				1																									1	0	0	1	0	0	0	0	0	0	0	0			1	1	0	0	0
Flacourtiac	Flacourtiaceae				1																									1	0	0	1	0	0	0	0	0	0	0	0			1	1	0	0	0
Fusea																														0	0	0	0	0	0	0	0	0	0	0	0			0	0	0	0	0
Gallesia	Gallesia							1																						0	1	1	0	1	0	1	0	0	0	0	0			1	1	0	0	0
Grammites																														0	0	0	0	0	0	0	0	0	0	0	0			0	0	0	0	0
Hedyosmum	Hedyosmum																				1			1						0	0	0	1	1	2	1	2	0	0	0	0			0	1	2	0	0
Heliotropium	Boraginaceae					1																								1	1	0	0	0	0	0	0	0	0	0	0			1	0	0	0	0
Hyeronima	Euphorbiaceae															1	1	1												1	1	1	1	1	1	1	1	0	1	1	0			1	1	1	1	1
Hymenea																														0	0	0	0	0	0	0	0	0	0	0	0			0	0	0	0	0
Hyptis	Hyptis												1																	0	0	1	0	0	0	0	0	0	0	0	0			1	0	0	0	0
Ilex	Ilex				1	1																								2	1	0	1	0	0	0	0	0	0	0	0			2	1	0	0	0
Iridaceae	Iridaceae																1	1	1											0	0	0	1	1	1	1	1	1	1	1	1			0	1	1	2	1
Isoetes																														0	0	0	0	0	0	0	0	0	0	0	0			0	0	0	0	0
Jamesonia	Jamesonia																		1											0	0	0	0	0	0	0	0	1	0	0	1			0	0	0	1	0
Juncac																														0	0	0	0	0	0	0	0	0	0	0	0			0	0	0	0	0
Laplacea	Laplacea						1																							0	1	0	1	0	0	0	0	0	0	0	0			1	1	0	0	0
Lentibularia																														0	0	0	0	0	0	0	0	0	0	0	0			0	0	0	0	0
Loranthac	Loranthaceae						1	1													1	1		1						0	2	1	2	2	2	3	3	0	0	0	0			2	4	3	0	0
Loranthac	Loranthaceae						1	1													1	1		1						0	2	1	2	2	2	3	3	0	0	0	0			2	4	3	0	0
Lycopod																														0	0	0	0	0	0	0	0	0	0	0	0			0	0	0	0	0
Mandevilla	Apocynaceae				1	1		1																						2	2	1	1	1	0	1	0	0	0	0	0			3	2	0	0	0
Melast <20	Melastomataceae				1	1		1													1									2	2	1	2	2	1	2	1	0	0	0	0			3	3	1	0	0
Melastomataceae	Melastomataceae				1	1		1													1									2	2	1	2	2	1	2	1	0	0	0	0			3	3	1	0	0
Meliac/sapot	Meliaceae				1			1													1			1						1	1	1	2	2	2	2	2	0	0	0	0			2	3	2	0	0
Mikania	Asteraceae															1		1							1	1		1		1	1	1	0	0	1	0	1	1	1	1	3			1	0	2	4	1
Mimosa (4de)	Mimosa							1													1									0	1	1	1	2	1	2	1	0	0	0	0			1	2	1	0	0
Mimosa scabr	Mimosa cf. M. scabrella																				1									0	0	0	1	1	1	1	1	0	0	0	0			0	1	1	0	0
Mimosac	Mimosa							1													1									0	1	1	1	2	1	2	1	0	0	0	0			1	2	1	0	0
Monolete																														0	0	0	0	0	0	0	0	0	0	0	0			0	0	0	0	0
Moraceae P2	Moraceae				1	1																								2	1	0	1	0	0	0	0	0	0	0	0			2	1	0	0	0
Mougeotia																														0	0	0	0	0	0	0	0	0	0	0	0			0	0	0	0	0
Myrica	Myrica																				1	1								0	0	0	1	1	1	2	2	0	0	0	0			0	2	2	0	0
Myriophyllum																														0	0	0	0	0	0	0	0	0	0	0	0			0	0	0	0	0
Myroxylon	Flacourtiaceae				1																									1	0	0	1	0	0	0	0	0	0	0	0			1	1	0	0	0
Myrsine	Myrsin				1																									1	0	0	1	0	0	0	0	0	0	0	0			1	1	0	0	0
Myrtaceae	Myrtaceae				1	1																		1						2	1	0	1	0	1	0	1	0	0	0	0			2	1	1	0	0
Ophioglossum																														0	0	0	0	0	0	0	0	0	0	0	0			0	0	0	0	0
Philodendron																														0	0	0	0	0	0	0	0	0	0	0	0			0	0	0	0	0
Piper	Piper						1	1																						0	2	1	1	1	0	1	0	0	0	0	0			2	2	0	0	0
Pisonia	Pisonia						1	1																						0	2	1	1	1	0	1	0	0	0	0	0			2	2	0	0	0
Poac	Poaceae	1																												0	0	0	0	0	0	0	0	0	0	0	0			0	0	0	0	0
Podocarpus	Podocarpus									1	1																			0	0	0	1	1	1	0	1	0	0	0	0			0	1	1	0	0
Poiretia	Leguminoseae/Fabaceae				1	1	1																							2	2	0	2	0	0	0	0	0	0	0	0			3	2	0	0	0
Polygala	Polygala												1			1	1													1	1	2	1	1	1	1	1	0	0	0	0			2	1	1	0	0
Polypod																														0	0	0	0	0	0	0	0	0	0	0	0			0	0	0	0	0
Puya	Puya																		1							1				0	0	0	0	0	0	0	0	2	0	0	2			0	0	0	2	0
Qualea																														0	0	0	0	0	0	0	0	0	0	0	0			0	0	0	0	0
Roupala	Roupala																				1			1						0	0	0	1	1	2	1	2	0	0	0	0			0	1	2	0	0
Satureja	Satureja																1	1												0	0	0	1	1	1	1	1	0	1	1	0			0	1	1	1	1
Schizeac																														0	0	0	0	0	0	0	0	0	0	0	0			0	0	0	0	0
Sebastiana	Sebastiana												1																	0	0	1	0	0	0	0	0	0	0	0	0			1	0	0	0	0
Selaginella	Selaginella																1		1											0	0	0	1	1	1	1	1	1	0	0	1			0	1	1	1	0
Solanum	Solanaceae				1								1								1			1						1	0	1	2	1	2	1	2	0	0	0	0			2	2	2	0	0
Sphagn																														0	0	0	0	0	0	0	0	0	0	0	0			0	0	0	0	0
Styrax	Styrax							1														1	1							0	1	1	0	1	0	2	1	0	0	0	0			1	2	1	0	0
Symplocos	Symplocos						1	1																						0	2	1	1	1	0	1	0	0	0	0	0			2	2	0	0	0
Talisia																														0	0	0	0	0	0	0	0	0	0	0	0			0	0	0	0	0
Terstroemia																														0	0	0	0	0	0	0	0	0	0	0	0			0	0	0	0	0
Terstroemia a sill																														0	0	0	0	0	0	0	0	0	0	0	0			0	0	0	0	0
Trema	Trema						1	1														1	1							0	2	1	1	1	0	2	1	0	0	0	0			2	3	1	0	0
Trilete																														0	0	0	0	0	0	0	0	0	0	0	0			0	0	0	0	0
Trixis	Trixis												1																	0	0	1	0	0	0	0	0	0	0	0	0			1	0	0	0	0
Typha																														0	0	0	0	0	0	0	0	0	0	0	0			0	0	0	0	0
Urticales																														0	0	0	0	0	0	0	0	0	0	0	0			0	0	0	0	0
Varia																														0	0	0	0	0	0	0	0	0	0	0	0			0	0	0	0	0
Weinmannia	Weinmannia																				1			1	1					0	0	0	1	1	2	1	3	0	0	0	1			0	1	3	1	0
Xyris	Xyris														1		1	1												0	0	1	1	1	1	1	1	0	1	2	0			1	1	1	1	2
[truncated: 11 more columns]

## Sheet: CUX
		Plant functional types																												BIOMES
		Graminoid	Mangrove	Tree fern	Tropical broad-leaved evergreen tree	Tropical xeric broad-leved evergreen tree	Tropical rain green tree	Dry tropical rain green tree	Cold temperate conifer	Cool temperate conifer	Maritime evergreen conifer	Eurythermic conifer	Tropical xerophytic tree/shrub	Desert shrub	Xerophytic forb	Tropical forb	Temperate forb	Eurythermic forb	Arctic forb	Cushion forb	Warm temperate evergreen broad-leaved tree	Temperate summer green tree	Temperate evergreen broad-leaved tree	Temperate cool deciduous broad-leaved tree	Temperate cold-deciduous broad-leaved tree	Arctic shrub	Warm temperate conifer	Heath		Tropical rainforest	Tropical seaonal forest	Tropical dry forest	Warm temperate rainforest	Warm temperate evergreen broadleaf forest	Cool temperate rainforest	Warm temperate rainforest	Cool mixed forest	Cool grass-lands	Steppe	Desert	Cool grass shrublands			MEGABIOMES
		g	man	tx	Te1	Te2	Tr1	Tr2	ctc	ctc1	ctc2	ec	txts	ds	df	tf	tef	sf	af	cp	wte	ts	ts1	wte1	wte4	aa	wtc	h		TRFO	TSFO	TDFO	WTRF	WEFO	CRTF	WAMF	COMI	CGSS	STEP	DESE	CGSH			tropical forest	warm-temperate forest	temperate forest	grassland and dry shrubland	desert
ACAENA/POLYLEPIS	Polylepis-Acaena												1												1					0	0	1	0	0	0	0	1	0	0	0	1			1	0	1	1	0
ACALYPHA	Acalypha															1	1													1	1	1	1	1	1	1	1	0	0	0	0			1	1	1	0	0
AETANTHUS	Loranthaceae						1	1													1	1		1						0	2	1	2	2	2	3	3	0	0	0	0			2	4	3	0	0
ALCHORNEA	Alchornea				1			1																						1	1	1	1	1	0	1	0	0	0	0	0			2	2	0	0	0
ALISMA-TYPE	Alismataceae															1														1	1	1	0	0	0	0	0	0	0	0	0			1	0	0	0	0
ALNUS	Alnus																					1		1						0	0	0	0	0	1	1	2	0	0	0	0			0	1	2	0	0
AMARANTHACEAE&CHENOPODIACEAE	Amaranthaceae / Chenopodiaceae																	1												0	0	0	0	0	0	0	0	0	1	1	0			0	0	0	1	1
ANTHOCEROS&HYMENOPHYLLUM&SELAGINELLA-TYPE	Antheroceros															1		1												1	1	1	0	0	0	0	0	0	1	1	0			1	0	0	1	1
ARAGOA	Aragoa																							1		1				0	0	0	0	0	1	0	1	1	0	0	1			0	0	1	1	0
ARCYTOPHYLLUM	Arcytophyllum																							1	1	1				0	0	0	0	0	1	0	2	1	0	0	2			0	0	2	2	0
ARTEMISIA-TYPE	Artemisia															1	1													1	1	1	1	1	1	1	1	0	0	0	0			1	1	1	0	0
BERBERIDACEAE	Berberidaceae																											1		0	0	0	0	0	1	0	0	0	0	0	1			0	0	1	1	0
BOCCONIA	Bocconia																							1						0	0	0	0	0	1	0	1	0	0	0	0			0	0	1	0	0
BORRERIA	Borreria																1	1	1											0	0	0	1	1	1	1	1	1	1	1	1			0	1	1	2	1
BOTRYCHIUM-TYPE																														0	0	0	0	0	0	0	0	0	0	0	0			0	0	0	0	0
CACTACEAE-TYPE	Cactaceae												1	1																0	0	1	0	0	0	0	0	0	0	0	0			1	0	0	0	0
CAMPANULACEAE	Campanulaceae																		1					1						0	0	0	0	0	1	0	1	1	0	0	1			0	0	1	1	0
CARYOPHYLLACEAE	Caryophyllaceae															1		1	1											1	1	1	0	0	0	0	0	1	1	1	1			1	0	0	2	1
CECROPIA	Cecropia				1	1																								2	1	0	1	0	0	0	0	0	0	0	0			2	1	0	0	0
CLUSIA	Clusia												1								1									0	0	1	1	1	1	1	1	0	0	0	0			1	1	1	0	0
COMPOSITAE																														0	0	0	0	0	0	0	0	0	0	0	0			0	0	0	0	0
CORDIA	Cordia							1					1																	0	1	2	0	1	0	1	0	0	0	0	0			2	1	0	0	0
CROTON	Croton					1															1									1	1	0	1	1	1	1	1	0	0	0	0			1	1	1	0	0
CRUCIFERAE	Cruciferae															1		1								1				1	1	1	0	0	0	0	0	1	1	1	1			1	0	0	2	1
CUPHEA	Cuphea							1					1																	0	1	2	0	1	0	1	0	0	0	0	0			2	1	0	0	0
CUPRESSUS-TYPE	Cupressaceae									1	1																			0	0	0	1	1	1	0	1	0	0	0	0			0	1	1	0	0
CYATHEA-TYPE	Cyathea			1																										1	1	0	1	1	1	0	0	0	0	0	0			1	1	1	0	0
CYPERACEAE																														0	0	0	0	0	0	0	0	0	0	0	0			0	0	0	0	0
DAPHNOPSIS	Daphnopsis																				1			1						0	0	0	1	1	2	1	2	0	0	0	0			0	1	2	0	0
DODONAEA	Dodonaea												1											1	1					0	0	1	0	0	1	0	2	0	0	0	1			1	0	2	1	0
DRYMIS	Drimys																							1						0	0	0	0	0	1	0	1	0	0	0	0			0	0	1	0	0
ERICACEAE	Ericaceae																							1	1	1		1		0	0	0	0	0	2	0	2	1	0	0	3			0	0	3	3	0
EUCALYPTUS																														0	0	0	0	0	0	0	0	0	0	0	0			0	0	0	0	0
EUGENIA-T	Eugenia																						1							0	0	0	0	0	0	0	0	0	0	0	0			0	0	0	0	0
FUCHSIA	Fuchsia																				1			1						0	0	0	1	1	2	1	2	0	0	0	0			0	1	2	0	0
GAYADENDRON	Gaiadendron																								1					0	0	0	0	0	0	0	1	0	0	0	1			0	0	1	1	0
GENTIANA&GENTIANELLA	Gentiana																									1				0	0	0	0	0	0	0	0	1	0	0	1			0	0	0	1	0
GERANIUM	Geraniaceae															1		1			1			1						1	1	1	1	1	2	1	2	0	1	1	0			1	1	2	1	1
GRAMINEAE																														0	0	0	0	0	0	0	0	0	0	0	0			0	0	0	0	0
HALENIA-TYPE	Halenia																		1											0	0	0	0	0	0	0	0	1	0	0	1			0	0	0	1	0
HEDYOSMUM	Hedyosmum																				1			1						0	0	0	1	1	2	1	2	0	0	0	0			0	1	2	0	0
HYDROCOTYLE	Hydrocotyle																1	1	1											0	0	0	1	1	1	1	1	1	1	1	1			0	1	1	2	1
HYPERICUM-T	Hypericum																							1		1				0	0	0	0	0	1	0	1	1	0	0	1			0	0	1	1	0
ILEX	Ilex				1	1																								2	1	0	1	0	0	0	0	0	0	0	0			2	1	0	0	0
ISOETES																														0	0	0	0	0	0	0	0	0	0	0	0			0	0	0	0	0
JAMESONIA	Jamesonia																		1											0	0	0	0	0	0	0	0	1	0	0	1			0	0	0	1	0
JUGLANS	Juglans																					1								0	0	0	0	0	0	1	1	0	0	0	0			0	1	1	0	0
JUNIPERUS	Juniperus										1																1			0	0	0	2	2	0	1	0	0	0	0	0			0	2	0	0	0
JUSSIAEA	Onagraceae															1	1													1	1	1	1	1	1	1	1	0	0	0	0			1	1	1	0	0
LABIATAE	Labiatae																		1		1			1						0	0	0	1	1	2	1	2	1	0	0	1			0	1	2	1	0
LOBELIA	Lobelia															1														1	1	1	0	0	0	0	0	0	0	0	0			1	0	0	0	0
LYCOPODIUM FOVEOLATE																														0	0	0	0	0	0	0	0	0	0	0	0			0	0	0	0	0
LYCOPODIUM RETICULATE																														0	0	0	0	0	0	0	0	0	0	0	0			0	0	0	0	0
MALPIGHIACEAE	Malpighiaceae				1		1						1								1									1	1	1	3	1	1	1	1	0	0	0	0			3	3	1	0	0
MALVACEAE	malvaceae						1	1									1													0	2	1	2	2	1	2	1	0	0	0	0			2	3	1	0	0
MARATTIA TYPE	Marattia				1																									1	0	0	1	0	0	0	0	0	0	0	0			1	1	0	0	0
MAURITIA TYPE	Mauritia				1	1																								2	1	0	1	0	0	0	0	0	0	0	0			2	1	0	0	0
MELASTOMATACEAE	Melastomataceae				1	1		1													1									2	2	1	2	2	1	2	1	0	0	0	0			3	3	1	0	0
MICONIA	Miconia				1	1							1																	2	1	1	1	0	0	0	0	0	0	0	0			3	1	0	0	0
MIMOSACEAE	Mimosa							1													1									0	1	1	1	2	1	2	1	0	0	0	0			1	2	1	0	0
MONOCOTYLEDONAE																														0	0	0	0	0	0	0	0	0	0	0	0			0	0	0	0	0
MONOLETES DIVERSE																														0	0	0	0	0	0	0	0	0	0	0	0			0	0	0	0	0
MONOLETES PSILATE																														0	0	0	0	0	0	0	0	0	0	0	0			0	0	0	0	0
MONOLETES VERRUCATE																														0	0	0	0	0	0	0	0	0	0	0	0			0	0	0	0	0
MYRICA	Myrica																				1	1								0	0	0	1	1	1	2	2	0	0	0	0			0	2	2	0	0
MYRIOPHYLLUM																														0	0	0	0	0	0	0	0	0	0	0	0			0	0	0	0	0
MYRTACEAE	Myrtaceae				1	1																		1						2	1	0	1	0	1	0	1	0	0	0	0			2	1	1	0	0
ORTHROSANTHUS	Iridaceae																1	1	1											0	0	0	1	1	1	1	1	1	1	1	1			0	1	1	2	1
PAEPALANTHUS																														0	0	0	0	0	0	0	0	0	0	0	0			0	0	0	0	0
PALICOUREA-TYPE	Palicourea												1								1									0	0	1	1	1	1	1	1	0	0	0	0			1	1	1	0	0
PALMAE	Palmae				1	1																								2	1	0	1	0	0	0	0	0	0	0	0			2	1	0	0	0
PANOPSIS	Panopsis				1	1																								2	1	0	1	0	0	0	0	0	0	0	0			2	1	0	0	0
PASSIFLORA	Passiflora				1	1		1																						2	2	1	1	1	0	1	0	0	0	0	0			3	2	0	0	0
PILEA	Pilea															1	1													1	1	1	1	1	1	1	1	0	0	0	0			1	1	1	0	0
PIPERACEAE																														0	0	0	0	0	0	0	0	0	0	0	0			0	0	0	0	0
PLANTAGO	Plantago																1	1	1	1										0	0	0	1	1	1	1	1	2	1	1	1			0	1	1	3	1
PODOCARPUS	Podocarpus									1	1																			0	0	0	1	1	1	0	1	0	0	0	0			0	1	1	0	0
POLYADITES																														0	0	0	0	0	0	0	0	0	0	0	0			0	0	0	0	0
POLYGALACEAE	Polygala												1			1	1													1	1	2	1	1	1	1	1	0	0	0	0			2	1	1	0	0
POLYGONUM																														0	0	0	0	0	0	0	0	0	0	0	0			0	0	0	0	0
POTAMOGETONACEAE																														0	0	0	0	0	0	0	0	0	0	0	0			0	0	0	0	0
PROTEACEAE	Proteaceae																				1			1						0	0	0	1	1	2	1	2	0	0	0	0			0	1	2	0	0
PSIDIUM TYPE																														0	0	0	0	0	0	0	0	0	0	0	0			0	0	0	0	0
PTERIDIUM TYPE																														0	0	0	0	0	0	0	0	0	0	0	0			0	0	0	0	0
QUERCUS	Quercus																				1			1						0	0	0	1	1	2	1	2	0	0	0	0			0	1	2	0	0
RANUNCULACEAE	Ranunculaceae																1	1												0	0	0	1	1	1	1	1	0	1	1	0			0	1	1	1	1
RAPANEA																														0	0	0	0	0	0	0	0	0	0	0	0			0	0	0	0	0
RELBUNIUM	Relbunium																		1											0	0	0	0	0	0	0	0	1	0	0	1			0	0	0	1	0
RIBES	Ribes																							1	1					0	0	0	0	0	1	0	2	0	0	0	1			0	0	2	1	0
ROSACEAE	Rosaceae																	1	1						1	1				0	0	0	0	0	0	0	1	2	1	1	3			0	0	1	4	1
RUMEX	Rumex																1		1											0	0	0	1	1	1	1	1	1	0	0	1			0	1	1	1	0
SAGITTARIA TYPE																														0	0	0	0	0	0	0	0	0	0	0	0			0	0	0	0	0
SALICACEAE																														0	0	0	0	0	0	0	0	0	0	0	0			0	0	0	0	0
SAPIUM	Sapium						1	1					1																	0	2	2	1	1	0	1	0	0	0	0	0			3	2	0	0	0
SELAGINELLA	Selaginella																1		1											0	0	0	1	1	1	1	1	1	0	0	1			0	1	1	1	0
SOLANACEAE	Solanaceae				1								1								1			1						1	0	1	2	1	2	1	2	0	0	0	0			2	2	2	0	0
SPERGULA TYPE	Caryophyllaceae															1		1	1											1	1	1	0	0	0	0	0	1	1	1	1			1	0	0	2	1
SPHAGNUM																														0	0	0	0	0	0	0	0	0	0	0	0			0	0	0	0	0
STILOCERAS																														0	0	0	0	0	0	0	0	0	0	0	0			0	0	0	0	0
SYMPLOCOS-T	Symplocos						1	1																						0	2	1	1	1	0	1	0	0	0	0	0			2	2	0	0	0
THALICTRUM	Thalictrum																1													0	0	0	1	1	1	1	1	0	0	0	0			0	1	1	0	0
TILIA-TYPE	Tiliaceae				1	1		1																						2	2	1	1	1	0	1	0	0	0	0	0			3	2	0	0	0
TILLANDSIA-TYPE	Bromeliaceae															1	1		1											1	1	1	1	1	1	1	1	1	0	0	1			1	1	1	1	0
TRICHOTOM C RET																														0	0	0	0	0	0	0	0	0	0	0	0			0	0	0	0	0
TRILETES DIVERSE																														0	0	0	0	0	0	0	0	0	0	0	0			0	0	0	0	0
TRILETES VERRUCATE																														0	0	0	0	0	0	0	0	0	0	0	0			0	0	0	0	0
TROPAEOLUM																														0	0	0	0	0	0	0	0	0	0	0	0			0	0	0	0	0
TYPHA																														0	0	0	0	0	0	0	0	0	0	0	0			0	0	0	0	0
UMBELLIFERAE	Umbelliferae															1	1	1	1											1	1	1	1	1	1	1	1	1	1	1	1			1	1	1	2	1
URTICACEAE-MORACEAE	Urticaceae															1	1	1												1	1	1	1	1	1	1	1	0	1	1	0			1	1	1	1	1
VALERIANA	Valeriana																		1											0	0	0	0	0	0	0	0	1	0	0	1			0	0	0	1	0
VALLEA	Vallea																					1	1							0	0	0	0	0	0	1	1	0	0	0	0			0	1	1	0	0
WEINMANNIA	Weinmannia																				1			1	1					0	0	0	1	1	2	1	3	0	0	0	1			0	1	3	1	0
[truncated: 11 more columns]

## Sheet: Ljunin
		Plant functional types																												BIOMES
		Graminoid	Mangrove	Tree fern	Tropical broad-leaved evergreen tree	Tropical xeric broad-leved evergreen tree	Tropical rain green tree	Dry tropical rain green tree	Cold temperate conifer	Cool temperate conifer	Maritime evergreen conifer	Eurythermic conifer	Tropical xerophytic tree/shrub	Desert shrub	Xerophytic forb	Tropical forb	Temperate forb	Eurythermic forb	Arctic forb	Cushion forb	Warm temperate evergreen broad-leaved tree	Temperate summer green tree	Temperate evergreen broad-leaved tree	Temperate cool deciduous broad-leaved tree	Temperate cold-deciduous broad-leaved tree	Arctic shrub	Warm temperate conifer	Heath		Tropical rainforest	Tropical seaonal forest	Tropical dry forest	Warm temperate rainforest	Warm temperate evergreen broadleaf forest	Cool temperate rainforest	Warm temperate rainforest	Cool mixed forest	Cool grass-lands	Steppe	Desert	Cool grass shrublands			MEGABIOMES
		g	man	tx	Te1	Te2	Tr1	Tr2	ctc	ctc1	ctc2	ec	txts	ds	df	tf	tef	sf	af	cp	wte	ts	ts1	wte1	wte4	aa	wtc	h		TRFO	TSFO	TDFO	WTRF	WEFO	CRTF	WAMF	COMI	CGSS	STEP	DESE	CGSH			tropical forest	warm-temperate forest	temperate forest	grassland and dry shrubland	desert
Acalypha	Acalypha															1	1													1	1	1	1	1	1	1	1	0	0	0	0			1	1	1	0	0
Alchornea	Alchornea				1			1																						1	1	1	1	1	0	1	0	0	0	0	0			2	2	0	0	0
Alnus	Alnus																					1		1						0	0	0	0	0	1	1	2	0	0	0	0			0	1	2	0	0
Alternanthera-type	Alternanthera														1			1												0	0	1	0	0	0	0	0	0	1	2	0			1	0	0	1	2
Ambrosia-type	Asteraceae															1		1							1	1		1		1	1	1	0	0	1	0	1	1	1	1	3			1	0	2	4	1
Apiaceae	Apiaceae																1			1										0	0	0	1	1	1	1	1	1	0	0	0			0	1	1	1	0
Artemisia	Artemisia															1	1													1	1	1	1	1	1	1	1	0	0	0	0			1	1	1	0	0
Asteraceae subf. Asteroideae undiff.	Asteraceae															1		1							1	1		1		1	1	1	0	0	1	0	1	1	1	1	3			1	0	2	4	1
Asteraceae subf. Cichorioideae	Asteraceae															1		1							1	1		1		1	1	1	0	0	1	0	1	1	1	1	3			1	0	2	4	1
Bocconia	Bocconia																							1						0	0	0	0	0	1	0	1	0	0	0	0			0	0	1	0	0
Borreria	Borreria																1	1	1											0	0	0	1	1	1	1	1	1	1	1	1			0	1	1	2	1
Brassicaceae	Brassicaceae															1	1													1	1	1	1	1	1	1	1	0	0	0	0			1	1	1	0	0
Buddleja	Buddleja																				1			1						0	0	0	1	1	2	1	2	0	0	0	0			0	1	2	0	0
Campanula	Campanulaceae																		1					1						0	0	0	0	0	1	0	1	1	0	0	1			0	0	1	1	0
Caryophyllaceae	Caryophyllaceae															1		1	1											1	1	1	0	0	0	0	0	1	1	1	1			1	0	0	2	1
Castilla-type	Castilla				1																									1	0	0	1	0	0	0	0	0	0	0	0			1	1	0	0	0
Cecropia	Cecropia				1	1																								2	1	0	1	0	0	0	0	0	0	0	0			2	1	0	0	0
cf. Cupressaceae	Cupressaceae									1	1																			0	0	0	1	1	1	0	1	0	0	0	0			0	1	1	0	0
cf. Ribes	Ribes																							1	1					0	0	0	0	0	1	0	2	0	0	0	1			0	0	2	1	0
cf. Sapium	Sapium						1	1					1																	0	2	2	1	1	0	1	0	0	0	0	0			3	2	0	0	0
cf. Scrophulariaceae	Scrophulariaceae																1		1											0	0	0	1	1	1	1	1	1	0	0	1			0	1	1	1	0
Chenopodiaceae/Amaranthaceae undiff.	Amaranthaceae / Chenopodiaceae																	1												0	0	0	0	0	0	0	0	0	1	1	0			0	0	0	1	1
Clethra	Clethra																							1	1					0	0	0	0	0	1	0	2	0	0	0	1			0	0	2	1	0
Coniferophyta undiff.																														0	0	0	0	0	0	0	0	0	0	0	0			0	0	0	0	0
Cyathea	Cyathea			1																										1	1	0	1	1	1	0	0	0	0	0	0			1	1	1	0	0
Cyatheaceae																														0	0	0	0	0	0	0	0	0	0	0	0			0	0	0	0	0
Cyperaceae																														0	0	0	0	0	0	0	0	0	0	0	0			0	0	0	0	0
Cystopteris																														0	0	0	0	0	0	0	0	0	0	0	0			0	0	0	0	0
Dodonaea	Dodonaea												1											1	1					0	0	1	0	0	1	0	2	0	0	0	1			1	0	2	1	0
Drimys	Drimys																							1						0	0	0	0	0	1	0	1	0	0	0	0			0	0	1	0	0
Dryopteris-type																														0	0	0	0	0	0	0	0	0	0	0	0			0	0	0	0	0
Ephedra	Ephedra													1	1											1				0	0	1	0	0	0	0	0	1	0	1	1			1	0	0	1	1
Ericaceae	Ericaceae																							1	1	1		1		0	0	0	0	0	2	0	2	1	0	0	3			0	0	3	3	0
Escallonia	Escallonia																						1			1				0	0	0	0	0	0	0	0	1	0	0	1			0	0	0	1	0
Eugenia	Eugenia																						1							0	0	0	0	0	0	0	0	0	0	0	0			0	0	0	0	0
Euphorbia	Euphorbia															1	1	1												1	1	1	1	1	1	1	1	0	1	1	0			1	1	1	1	1
Fabaceae	Fabaceae															1	1	1												1	1	1	1	1	1	1	1	0	1	1	0			1	1	1	1	1
Ficus	Ficus				1																									1	0	0	1	0	0	0	0	0	0	0	0			1	1	0	0	0
Gentianaceae	Gentianaceae																									1				0	0	0	0	0	0	0	0	1	0	0	1			0	0	0	1	0
Grammitis																														0	0	0	0	0	0	0	0	0	0	0	0			0	0	0	0	0
Hedyosmum	Hedyosmum																				1			1						0	0	0	1	1	2	1	2	0	0	0	0			0	1	2	0	0
Humulus-type	Humulus					1							1																	1	1	1	0	0	0	0	0	0	0	0	0			2	0	0	0	0
Hypericum	Hypericum																							1		1				0	0	0	0	0	1	0	1	1	0	0	1			0	0	1	1	0
Ilex	Ilex				1	1																								2	1	0	1	0	0	0	0	0	0	0	0			2	1	0	0	0
Indeterminable																														0	0	0	0	0	0	0	0	0	0	0	0			0	0	0	0	0
Iso‰tes																														0	0	0	0	0	0	0	0	0	0	0	0			0	0	0	0	0
Iva xanthifolia-type	Iva xanthifolia-type				1																									1	0	0	1	0	0	0	0	0	0	0	0			1	1	0	0	0
Jamesonia	Jamesonia																		1											0	0	0	0	0	0	0	0	1	0	0	1			0	0	0	1	0
Juglans	Juglans																					1								0	0	0	0	0	0	1	1	0	0	0	0			0	1	1	0	0
Lamiaceae	Lamiaceae															1	1	1	1											1	1	1	1	1	1	1	1	1	1	1	1			1	1	1	2	1
Liliaceae	Liliaceae															1	1	1												1	1	1	1	1	1	1	1	0	1	1	0			1	1	1	1	1
Loranthaceae	Loranthaceae						1	1													1	1		1						0	2	1	2	2	2	3	3	0	0	0	0			2	4	3	0	0
Lycopodium annotinum-type																														0	0	0	0	0	0	0	0	0	0	0	0			0	0	0	0	0
Lycopodium clavatum-type																														0	0	0	0	0	0	0	0	0	0	0	0			0	0	0	0	0
Lysipomia	Lysipomia																		1											0	0	0	0	0	0	0	0	1	0	0	1			0	0	0	1	0
Malvaceae	malvaceae						1	1									1													0	2	1	2	2	1	2	1	0	0	0	0			2	3	1	0	0
Miconia-type	Miconia				1	1							1																	2	1	1	1	0	0	0	0	0	0	0	0			3	1	0	0	0
Mimosaceae	Mimosa							1													1									0	1	1	1	2	1	2	1	0	0	0	0			1	2	1	0	0
Moraceae (diporate)	Moraceae				1	1																								2	1	0	1	0	0	0	0	0	0	0	0			2	1	0	0	0
Mutisia	Mutisia																1	1			1									0	0	0	2	2	2	2	2	0	1	1	0			0	2	2	1	1
Myrica	Myrica																				1	1								0	0	0	1	1	1	2	2	0	0	0	0			0	2	2	0	0
Myriophyllum																														0	0	0	0	0	0	0	0	0	0	0	0			0	0	0	0	0
Myrsinaceae undiff.																														0	0	0	0	0	0	0	0	0	0	0	0			0	0	0	0	0
Myrsine	Myrsin				1																									1	0	0	1	0	0	0	0	0	0	0	0			1	1	0	0	0
Myrtaceae undiff.	Myrtaceae				1	1																		1						2	1	0	1	0	1	0	1	0	0	0	0			2	1	1	0	0
Plantago rigida-type	Plantago																1	1	1	1										0	0	0	1	1	1	1	1	2	1	1	1			0	1	1	3	1
Plantago sericea-type	Plantago																1	1	1	1										0	0	0	1	1	1	1	1	2	1	1	1			0	1	1	3	1
Poaceae	Poaceae	1																												0	0	0	0	0	0	0	0	0	0	0	0			0	0	0	0	0
Podocarpus	Podocarpus									1	1																			0	0	0	1	1	1	0	1	0	0	0	0			0	1	1	0	0
Polylepis/Acaena	Polylepis-Acaena												1												1					0	0	1	0	0	0	0	1	0	0	0	1			1	0	1	1	0
Polypodium-type																														0	0	0	0	0	0	0	0	0	0	0	0			0	0	0	0	0
Potamogeton																														0	0	0	0	0	0	0	0	0	0	0	0			0	0	0	0	0
Proteaceae	Proteaceae																				1			1						0	0	0	1	1	2	1	2	0	0	0	0			0	1	2	0	0
Pteridium-type																														0	0	0	0	0	0	0	0	0	0	0	0			0	0	0	0	0
Puya	Puya																		1							1				0	0	0	0	0	0	0	0	2	0	0	2			0	0	0	2	0
Ranunculus	Ranunculaceae																1	1												0	0	0	1	1	1	1	1	0	1	1	0			0	1	1	1	1
Rosaceae undiff.	Rosaceae																	1	1						1	1				0	0	0	0	0	0	0	1	2	1	1	3			0	0	1	4	1
Rubiaceae undiff.	Rubiaceae				1		1									1	1	1	1											2	2	1	3	1	1	1	1	1	1	1	1			3	3	1	2	1
Rumex	Rumex																1		1											0	0	0	1	1	1	1	1	1	0	0	1			0	1	1	1	0
Salix	Salix						1	1																						0	2	1	1	1	0	1	0	0	0	0	0			2	2	0	0	0
Sambucus-type	Sambucus																				1			1						0	0	0	1	1	2	1	2	0	0	0	0			0	1	2	0	0
Schinus	Schinus							1					1																	0	1	2	0	1	0	1	0	0	0	0	0			2	1	0	0	0
Senecio-type	Senecio																									1				0	0	0	0	0	0	0	0	1	0	0	1			0	0	0	1	0
Solanaceae	Solanaceae				1								1								1			1						1	0	1	2	1	2	1	2	0	0	0	0			2	2	2	0	0
Sphagnum																														0	0	0	0	0	0	0	0	0	0	0	0			0	0	0	0	0
Spore (monolete foveolate)																														0	0	0	0	0	0	0	0	0	0	0	0			0	0	0	0	0
Spore (trilete foveolate)																														0	0	0	0	0	0	0	0	0	0	0	0			0	0	0	0	0
Spore (trilete undiff.)																														0	0	0	0	0	0	0	0	0	0	0	0			0	0	0	0	0
Spore (trilete verrucate)																														0	0	0	0	0	0	0	0	0	0	0	0			0	0	0	0	0
Thalictrum	Thalictrum																1													0	0	0	1	1	1	1	1	0	0	0	0			0	1	1	0	0
Trema	Trema						1	1														1	1							0	2	1	1	1	0	2	1	0	0	0	0			2	3	1	0	0
Typha latifolia-type																														0	0	0	0	0	0	0	0	0	0	0	0			0	0	0	0	0
Unknown																														0	0	0	0	0	0	0	0	0	0	0	0			0	0	0	0	0
Urticaceae	Urticaceae															1	1	1												1	1	1	1	1	1	1	1	0	1	1	0			1	1	1	1	1
Urticales undiff.																														0	0	0	0	0	0	0	0	0	0	0	0			0	0	0	0	0
Valeriana	Valeriana																		1											0	0	0	0	0	0	0	0	1	0	0	1			0	0	0	1	0
Weinmannia	Weinmannia																				1			1	1					0	0	0	1	1	2	1	3	0	0	0	1			0	1	3	1	0
[truncated: 11 more columns]

## Sheet: Patzcuar
		Plant functional types																												BIOMES
		Graminoid	Mangrove	Tree fern	Tropical broad-leaved evergreen tree	Tropical xeric broad-leved evergreen tree	Tropical rain green tree	Dry tropical rain green tree	Cold temperate conifer	Cool temperate conifer	Maritime evergreen conifer	Eurythermic conifer	Tropical xerophytic tree/shrub	Desert shrub	Xerophytic forb	Tropical forb	Temperate forb	Eurythermic forb	Arctic forb	Cushion forb	Warm temperate evergreen broad-leaved tree	Temperate summer green tree	Temperate evergreen broad-leaved tree	Temperate cool deciduous broad-leaved tree	Temperate cold-deciduous broad-leaved tree	Arctic shrub	Warm temperate conifer	Heath		Tropical rainforest	Tropical seaonal forest	Tropical dry forest	Warm temperate rainforest	Warm temperate evergreen broadleaf forest	Cool temperate rainforest	Warm temperate rainforest	Cool mixed forest	Cool grass-lands	Steppe	Desert	Cool grass shrublands			MEGABIOMES
		g	man	tx	Te1	Te2	Tr1	Tr2	ctc	ctc1	ctc2	ec	txts	ds	df	tf	tef	sf	af	cp	wte	ts	ts1	wte1	wte4	aa	wtc	h		TRFO	TSFO	TDFO	WTRF	WEFO	CRTF	WAMF	COMI	CGSS	STEP	DESE	CGSH			tropical forest	warm-temperate forest	temperate forest	grassland and dry shrubland	desert
Abies	Abies										1																1			0	0	0	2	2	0	1	0	0	0	0	0			0	2	0	0	0
Alnus	Alnus																					1		1						0	0	0	0	0	1	1	2	0	0	0	0			0	1	2	0	0
Ambrosia	Asteraceae															1		1							1	1		1		1	1	1	0	0	1	0	1	1	1	1	3			1	0	2	4	1
Amorpha	Leguminoseae/Fabaceae				1	1	1																							2	2	0	2	0	0	0	0	0	0	0	0			3	2	0	0	0
Apiaceae	Apiaceae																1			1										0	0	0	1	1	1	1	1	1	0	0	0			0	1	1	1	0
Artemisia	Artemisia															1	1													1	1	1	1	1	1	1	1	0	0	0	0			1	1	1	0	0
Asteraceae subf. Asteroideae undiff.	Asteraceae															1		1							1	1		1		1	1	1	0	0	1	0	1	1	1	1	3			1	0	2	4	1
Brassicaceae	Brassicaceae															1	1													1	1	1	1	1	1	1	1	0	0	0	0			1	1	1	0	0
Buddleja	Buddleja																				1			1						0	0	0	1	1	2	1	2	0	0	0	0			0	1	2	0	0
Caryophyllaceae	Caryophyllaceae															1		1	1											1	1	1	0	0	0	0	0	1	1	1	1			1	0	0	2	1
Celtis	Celtis				1	1																								2	1	0	1	0	0	0	0	0	0	0	0			2	1	0	0	0
cf. Agave	Agave												1	1																0	0	1	0	0	0	0	0	0	0	0	0			1	0	0	0	0
cf. Amorpha	Leguminoseae/Fabaceae				1	1	1																							2	2	0	2	0	0	0	0	0	0	0	0			3	2	0	0	0
cf. Brassicaceae	Brassicaceae															1	1													1	1	1	1	1	1	1	1	0	0	0	0			1	1	1	0	0
cf. Elaeagnaceae																														0	0	0	0	0	0	0	0	0	0	0	0			0	0	0	0	0
cf. Morus	Moraceae				1	1																								2	1	0	1	0	0	0	0	0	0	0	0			2	1	0	0	0
cf. Myrica	Myrica																				1	1								0	0	0	1	1	1	2	2	0	0	0	0			0	2	2	0	0
cf. Pistacia	Anacardiaceae						1	1																						0	2	1	1	1	0	1	0	0	0	0	0			2	2	0	0	0
cf. Rhamnus	Rhamnaceae							1					1																	0	1	2	0	1	0	1	0	0	0	0	0			2	1	0	0	0
cf. Rosaceae	Rosaceae																	1	1						1	1				0	0	0	0	0	0	0	1	2	1	1	3			0	0	1	4	1
cf. Trema	Trema						1	1														1	1							0	2	1	1	1	0	2	1	0	0	0	0			2	3	1	0	0
Chenopodium-type	Amaranthaceae / Chenopodiaceae																	1												0	0	0	0	0	0	0	0	0	1	1	0			0	0	0	1	1
Clethra	Clethra																							1	1					0	0	0	0	0	1	0	2	0	0	0	1			0	0	2	1	0
Cornus																														0	0	0	0	0	0	0	0	0	0	0	0			0	0	0	0	0
Cyperaceae																														0	0	0	0	0	0	0	0	0	0	0	0			0	0	0	0	0
Euphorbia	Euphorbia															1	1	1												1	1	1	1	1	1	1	1	0	1	1	0			1	1	1	1	1
Fagus	Fagus																					1								0	0	0	0	0	0	1	1	0	0	0	0			0	1	1	0	0
Fraxinus	Fraxinus																					1								0	0	0	0	0	0	1	1	0	0	0	0			0	1	1	0	0
Ilex	Ilex				1	1																								2	1	0	1	0	0	0	0	0	0	0	0			2	1	0	0	0
Iso‰tes																														0	0	0	0	0	0	0	0	0	0	0	0			0	0	0	0	0
Juniperus-type	Juniperus										1																1			0	0	0	2	2	0	1	0	0	0	0	0			0	2	0	0	0
Lamiaceae	Lamiaceae															1	1	1	1											1	1	1	1	1	1	1	1	1	1	1	1			1	1	1	2	1
Liquidambar	Liquidambar															1		1	1				1							1	1	1	0	0	0	0	0	1	1	1	1			1	0	0	2	1
Moraceae undiff.	Moraceae				1	1																								2	1	0	1	0	0	0	0	0	0	0	0			2	1	0	0	0
Morus	Moraceae				1	1																								2	1	0	1	0	0	0	0	0	0	0	0			2	1	0	0	0
Myrica	Myrica																				1	1								0	0	0	1	1	1	2	2	0	0	0	0			0	2	2	0	0
Ostrya-type	Ostrya-type																							1						0	0	0	0	0	1	0	1	0	0	0	0			0	0	1	0	0
Pinus	Pinus									1																	1			0	0	0	1	1	1	1	1	0	0	0	0			0	1	1	0	0
Plantago	Plantago																1	1	1	1										0	0	0	1	1	1	1	1	2	1	1	1			0	1	1	3	1
Platanus																														0	0	0	0	0	0	0	0	0	0	0	0			0	0	0	0	0
Poaceae undiff.	Poaceae	1																												0	0	0	0	0	0	0	0	0	0	0	0			0	0	0	0	0
Polygonum persicaria																														0	0	0	0	0	0	0	0	0	0	0	0			0	0	0	0	0
Potamogetonaceae																														0	0	0	0	0	0	0	0	0	0	0	0			0	0	0	0	0
Quercus																														0	0	0	0	0	0	0	0	0	0	0	0			0	0	0	0	0
Rhus	Rhus															1														1	1	1	0	0	0	0	0	0	0	0	0			1	0	0	0	0
Rosaceae	Rosaceae																	1	1						1	1				0	0	0	0	0	0	0	1	2	1	1	3			0	0	1	4	1
Rumex	Rumex																1		1											0	0	0	1	1	1	1	1	1	0	0	1			0	1	1	1	0
Thalictrum	Thalictrum																1													0	0	0	1	1	1	1	1	0	0	0	0			0	1	1	0	0
Trema	Trema						1	1														1	1							0	2	1	1	1	0	2	1	0	0	0	0			2	3	1	0	0
Typha angustifolia-type																														0	0	0	0	0	0	0	0	0	0	0	0			0	0	0	0	0
Typha latifolia																														0	0	0	0	0	0	0	0	0	0	0	0			0	0	0	0	0
Unknown																														0	0	0	0	0	0	0	0	0	0	0	0			0	0	0	0	0
Zea mays	Poaceae	1																												0	0	0	0	0	0	0	0	0	0	0	0			0	0	0	0	0
[truncated: 11 more columns]

## Sheet: Quex
		Plant functional types																												BIOMES
		Graminoid	Mangrove	Tree fern	Tropical broad-leaved evergreen tree	Tropical xeric broad-leved evergreen tree	Tropical rain green tree	Dry tropical rain green tree	Cold temperate conifer	Cool temperate conifer	Maritime evergreen conifer	Eurythermic conifer	Tropical xerophytic tree/shrub	Desert shrub	Xerophytic forb	Tropical forb	Temperate forb	Eurythermic forb	Arctic forb	Cushion forb	Warm temperate evergreen broad-leaved tree	Temperate summer green tree	Temperate evergreen broad-leaved tree	Temperate cool deciduous broad-leaved tree	Temperate cold-deciduous broad-leaved tree	Arctic shrub	Warm temperate conifer	Heath		Tropical rainforest	Tropical seaonal forest	Tropical dry forest	Warm temperate rainforest	Warm temperate evergreen broadleaf forest	Cool temperate rainforest	Warm temperate rainforest	Cool mixed forest	Cool grass-lands	Steppe	Desert	Cool grass shrublands			MEGABIOMES
		g	man	tx	Te1	Te2	Tr1	Tr2	ctc	ctc1	ctc2	ec	txts	ds	df	tf	tef	sf	af	cp	wte	ts	ts1	wte1	wte4	aa	wtc	h		TRFO	TSFO	TDFO	WTRF	WEFO	CRTF	WAMF	COMI	CGSS	STEP	DESE	CGSH			tropical forest	warm-temperate forest	temperate forest	grassland and dry shrubland	desert
Acalypha	Acalypha															1	1													1	1	1	1	1	1	1	1	0	0	0	0			1	1	1	0	0
Alchornea	Alchornea				1			1																						1	1	1	1	1	0	1	0	0	0	0	0			2	2	0	0	0
Alfaroa	Alfaroa																								1					0	0	0	0	0	0	0	1	0	0	0	1			0	0	1	1	0
Alnus	Alnus																					1		1						0	0	0	0	0	1	1	2	0	0	0	0			0	1	2	0	0
Alternanthera	Alternanthera														1			1												0	0	1	0	0	0	0	0	0	1	2	0			1	0	0	1	2
Anacardiaceae undiff.	Anacardiaceae						1	1																						0	2	1	1	1	0	1	0	0	0	0	0			2	2	0	0	0
Arecaceae	Arecaceae				1																			1						1	0	0	1	0	1	0	1	0	0	0	0			1	1	1	0	0
Asteraceae	Asteraceae															1		1							1	1		1		1	1	1	0	0	1	0	1	1	1	1	3			1	0	2	4	1
Betula																														0	0	0	0	0	0	0	0	0	0	0	0			0	0	0	0	0
Bombacaceae	Bombacaceae				1		1	1																						1	2	1	2	1	0	1	0	0	0	0	0			3	3	0	0	0
Botryococcus																														0	0	0	0	0	0	0	0	0	0	0	0			0	0	0	0	0
Brosimum	Brosimum				1	1		1																						2	2	1	1	1	0	1	0	0	0	0	0			3	2	0	0	0
Bursera	Bursera							1					1																	0	1	2	0	1	0	1	0	0	0	0	0			2	1	0	0	0
Byrsonima	Byrsonima							1					1																	0	1	2	0	1	0	1	0	0	0	0	0			2	1	0	0	0
Cactaceae	Cactaceae												1	1																0	0	1	0	0	0	0	0	0	0	0	0			1	0	0	0	0
Caryophyllaceae (small)	Caryophyllaceae															1		1	1											1	1	1	0	0	0	0	0	1	1	1	1			1	0	0	2	1
Cecropia	Cecropia				1	1																								2	1	0	1	0	0	0	0	0	0	0	0			2	1	0	0	0
Celtis	Celtis				1	1																								2	1	0	1	0	0	0	0	0	0	0	0			2	1	0	0	0
Chenopodiaceae/Amaranthaceae undiff.	Amaranthaceae / Chenopodiaceae																	1												0	0	0	0	0	0	0	0	0	1	1	0			0	0	0	1	1
Citharexylum																														0	0	0	0	0	0	0	0	0	0	0	0			0	0	0	0	0
Convolvulaceae	Convolvulaceae												1																	0	0	1	0	0	0	0	0	0	0	0	0			1	0	0	0	0
Cornus																														0	0	0	0	0	0	0	0	0	0	0	0			0	0	0	0	0
Croton	Croton					1															1									1	1	0	1	1	1	1	1	0	0	0	0			1	1	1	0	0
Cyperaceae																														0	0	0	0	0	0	0	0	0	0	0	0			0	0	0	0	0
Didymopanax	Didymopanax					1	1	1																						1	3	1	1	1	0	1	0	0	0	0	0			3	2	0	0	0
Dorstenia	Moraceae				1	1																								2	1	0	1	0	0	0	0	0	0	0	0			2	1	0	0	0
Eichhornia	Eichhornia												1																	0	0	1	0	0	0	0	0	0	0	0	0			1	0	0	0	0
Ficus	Ficus				1																									1	0	0	1	0	0	0	0	0	0	0	0			1	1	0	0	0
Fraxinus	Fraxinus																					1								0	0	0	0	0	0	1	1	0	0	0	0			0	1	1	0	0
Gymnanthes	Euphorbiaceae															1	1	1												1	1	1	1	1	1	1	1	0	1	1	0			1	1	1	1	1
Hasseltia	Apocynaceae				1	1		1																						2	2	1	1	1	0	1	0	0	0	0	0			3	2	0	0	0
Hedyosmum	Hedyosmum																				1			1						0	0	0	1	1	2	1	2	0	0	0	0			0	1	2	0	0
Ilex	Ilex				1	1																								2	1	0	1	0	0	0	0	0	0	0	0			2	1	0	0	0
Indeterminable																														0	0	0	0	0	0	0	0	0	0	0	0			0	0	0	0	0
Juglans	Juglans																					1								0	0	0	0	0	0	1	1	0	0	0	0			0	1	1	0	0
Juniperus	Juniperus										1																1			0	0	0	2	2	0	1	0	0	0	0	0			0	2	0	0	0
Liquidambar	Liquidambar															1		1	1				1							1	1	1	0	0	0	0	0	1	1	1	1			1	0	0	2	1
Lozanella	Ulmaceae																					1								0	0	0	0	0	0	1	1	0	0	0	0			0	1	1	0	0
Maclura	Moraceae				1	1																								2	1	0	1	0	0	0	0	0	0	0	0			2	1	0	0	0
Malpighiaceae undiff.	Malpighiaceae				1		1						1								1									1	1	1	3	1	1	1	1	0	0	0	0			3	3	1	0	0
Malvaceae	malvaceae						1	1									1													0	2	1	2	2	1	2	1	0	0	0	0			2	3	1	0	0
Melastomataceae	Melastomataceae				1	1		1													1									2	2	1	2	2	1	2	1	0	0	0	0			3	3	1	0	0
Mimosa	Mimosa							1													1									0	1	1	1	2	1	2	1	0	0	0	0			1	2	1	0	0
Moraceae (triporate)	Moraceae				1	1																								2	1	0	1	0	0	0	0	0	0	0	0			2	1	0	0	0
Myrica	Myrica																				1	1								0	0	0	1	1	1	2	2	0	0	0	0			0	2	2	0	0
Myrsine	Myrsin				1																									1	0	0	1	0	0	0	0	0	0	0	0			1	1	0	0	0
Myrtaceae	Myrtaceae				1	1																		1						2	1	0	1	0	1	0	1	0	0	0	0			2	1	1	0	0
Onagraceae	Onagraceae															1	1													1	1	1	1	1	1	1	1	0	0	0	0			1	1	1	0	0
Ostrya/Carpinus	Ostrya-type																							1						0	0	0	0	0	1	0	1	0	0	0	0			0	0	1	0	0
Palicourea	Palicourea												1								1									0	0	1	1	1	1	1	1	0	0	0	0			1	1	1	0	0
Pediastrum																														0	0	0	0	0	0	0	0	0	0	0	0			0	0	0	0	0
Pinus	Pinus									1																	1			0	0	0	1	1	1	1	1	0	0	0	0			0	1	1	0	0
Piperaceae	Piper						1	1																						0	2	1	1	1	0	1	0	0	0	0	0			2	2	0	0	0
Poaceae	Poaceae	1																												0	0	0	0	0	0	0	0	0	0	0	0			0	0	0	0	0
Podocarpus	Podocarpus									1	1																			0	0	0	1	1	1	0	1	0	0	0	0			0	1	1	0	0
Polygonum																														0	0	0	0	0	0	0	0	0	0	0	0			0	0	0	0	0
Potamogeton																														0	0	0	0	0	0	0	0	0	0	0	0			0	0	0	0	0
Pourouma																														0	0	0	0	0	0	0	0	0	0	0	0			0	0	0	0	0
Pouteria	Pouteria												1				1	1												0	0	1	1	1	1	1	1	0	1	1	0			1	1	1	1	1
Proteaceae	Proteaceae																				1			1						0	0	0	1	1	2	1	2	0	0	0	0			0	1	2	0	0
Quercus	Quercus																				1			1						0	0	0	1	1	2	1	2	0	0	0	0			0	1	2	0	0
Sagittaria																														0	0	0	0	0	0	0	0	0	0	0	0			0	0	0	0	0
Sapindus																														0	0	0	0	0	0	0	0	0	0	0	0			0	0	0	0	0
Sapium	Sapium						1	1					1																	0	2	2	1	1	0	1	0	0	0	0	0			3	2	0	0	0
Sapotaceae undiff.	Sapotaceae				1	1																								2	1	0	1	0	0	0	0	0	0	0	0			2	1	0	0	0
Solanaceae	Solanaceae				1								1								1			1						1	0	1	2	1	2	1	2	0	0	0	0			2	2	2	0	0
Spondias	Spondias						1	1																						0	2	1	1	1	0	1	0	0	0	0	0			2	2	0	0	0
Spore (monolete)																														0	0	0	0	0	0	0	0	0	0	0	0			0	0	0	0	0
Spore (trilete)																														0	0	0	0	0	0	0	0	0	0	0	0			0	0	0	0	0
Thalictrum	Thalictrum																1													0	0	0	1	1	1	1	1	0	0	0	0			0	1	1	0	0
Trees and shrubs undiff.																														0	0	0	0	0	0	0	0	0	0	0	0			0	0	0	0	0
Trema	Trema						1	1														1	1							0	2	1	1	1	0	2	1	0	0	0	0			2	3	1	0	0
Typha																														0	0	0	0	0	0	0	0	0	0	0	0			0	0	0	0	0
Ulmus																														0	0	0	0	0	0	0	0	0	0	0	0			0	0	0	0	0
Unknown (polyad)																														0	0	0	0	0	0	0	0	0	0	0	0			0	0	0	0	0
Unknown undiff.																														0	0	0	0	0	0	0	0	0	0	0	0			0	0	0	0	0
Urticaceae	Urticaceae															1	1	1												1	1	1	1	1	1	1	1	0	1	1	0			1	1	1	1	1
Zanthoxylum	Zanthoxylum						1	1																						0	2	1	1	1	0	1	0	0	0	0	0			2	2	0	0	0
Zygnemataceae																														0	0	0	0	0	0	0	0	0	0	0	0			0	0	0	0	0
[truncated: 11 more columns]

## Sheet: Sali3
		Plant functional types																												BIOMES
		Graminoid	Mangrove	Tree fern	Tropical broad-leaved evergreen tree	Tropical xeric broad-leved evergreen tree	Tropical rain green tree	Dry tropical rain green tree	Cold temperate conifer	Cool temperate conifer	Maritime evergreen conifer	Eurythermic conifer	Tropical xerophytic tree/shrub	Desert shrub	Xerophytic forb	Tropical forb	Temperate forb	Eurythermic forb	Arctic forb	Cushion forb	Warm temperate evergreen broad-leaved tree	Temperate summer green tree	Temperate evergreen broad-leaved tree	Temperate cool deciduous broad-leaved tree	Temperate cold-deciduous broad-leaved tree	Arctic shrub	Warm temperate conifer	Heath		Tropical rainforest	Tropical seaonal forest	Tropical dry forest	Warm temperate rainforest	Warm temperate evergreen broadleaf forest	Cool temperate rainforest	Warm temperate rainforest	Cool mixed forest	Cool grass-lands	Steppe	Desert	Cool grass shrublands			MEGABIOMES
		g	man	tx	Te1	Te2	Tr1	Tr2	ctc	ctc1	ctc2	ec	txts	ds	df	tf	tef	sf	af	cp	wte	ts	ts1	wte1	wte4	aa	wtc	h		TRFO	TSFO	TDFO	WTRF	WEFO	CRTF	WAMF	COMI	CGSS	STEP	DESE	CGSH			tropical forest	warm-temperate forest	temperate forest	grassland and dry shrubland	desert
Acalypha	Acalypha															1	1													1	1	1	1	1	1	1	1	0	0	0	0			1	1	1	0	0
Alchornea	Alchornea				1			1																						1	1	1	1	1	0	1	0	0	0	0	0			2	2	0	0	0
Alismataceae undiff.	Alismataceae															1														1	1	1	0	0	0	0	0	0	0	0	0			1	0	0	0	0
Alternanthera	Alternanthera														1			1												0	0	1	0	0	0	0	0	0	1	2	0			1	0	0	1	2
Andira-type	Andira-type						1	1																						0	2	1	1	1	0	1	0	0	0	0	0			2	2	0	0	0
Apiaceae	Apiaceae																1			1										0	0	0	1	1	1	1	1	1	0	0	0			0	1	1	1	0
Arecaceae (monocolpate)	Arecaceae				1																			1						1	0	0	1	0	1	0	1	0	0	0	0			1	1	1	0	0
Arecaceae (tricolpate)	Arecaceae				1																			1						1	0	0	1	0	1	0	1	0	0	0	0			1	1	1	0	0
Asteraceae subf. Asteroideae type I	Asteraceae															1		1							1	1		1		1	1	1	0	0	1	0	1	1	1	1	3			1	0	2	4	1
Asteraceae subf. Asteroideae type II	Asteraceae															1		1							1	1		1		1	1	1	0	0	1	0	1	1	1	1	3			1	0	2	4	1
Astronium	Astronium						1	1																						0	2	1	1	1	0	1	0	0	0	0	0			2	2	0	0	0
Begonia	Begonia															1														1	1	1	0	0	0	0	0	0	0	0	0			1	0	0	0	0
Belangera	Cunoniaceae				1																									1	0	0	1	0	0	0	0	0	0	0	0			1	1	0	0	0
Borreria	Borreria																1	1	1											0	0	0	1	1	1	1	1	1	1	1	1			0	1	1	2	1
Botryococcus																														0	0	0	0	0	0	0	0	0	0	0	0			0	0	0	0	0
Buchnera																														0	0	0	0	0	0	0	0	0	0	0	0			0	0	0	0	0
Caesalpiniaceae undiff.	Caesalpinea						1	1																						0	2	1	1	1	0	1	0	0	0	0	0			2	2	0	0	0
Campomanesia	Campomanesia				1																									1	0	0	1	0	0	0	0	0	0	0	0			1	1	0	0	0
Caryophyllaceae	Caryophyllaceae															1		1	1											1	1	1	0	0	0	0	0	1	1	1	1			1	0	0	2	1
Casearia (reticulate)	Flacourtiaceae				1																									1	0	0	1	0	0	0	0	0	0	0	0			1	1	0	0	0
Celtis (tetraporate)	Celtis				1	1																								2	1	0	1	0	0	0	0	0	0	0	0			2	1	0	0	0
Celtis undiff.	Celtis				1	1																								2	1	0	1	0	0	0	0	0	0	0	0			2	1	0	0	0
Chenopodiaceae	Amaranthaceae / Chenopodiaceae																	1												0	0	0	0	0	0	0	0	0	1	1	0			0	0	0	1	1
Chomelia	Chomelia												1																	0	0	1	0	0	0	0	0	0	0	0	0			1	0	0	0	0
Chrysobalanus																														0	0	0	0	0	0	0	0	0	0	0	0			0	0	0	0	0
Chrysophyllum	Chrysophyllum							1					1																	0	1	2	0	1	0	1	0	0	0	0	0			2	1	0	0	0
Combretaceae/Melastomataceae undiff.	Combretaceae					1		1					1																	1	2	2	0	1	0	1	0	0	0	0	0			3	1	0	0	0
Connarus	Connarus																	1												0	0	0	0	0	0	0	0	0	1	1	0			0	0	0	1	1
Croton undiff.	Croton					1															1									1	1	0	1	1	1	1	1	0	0	0	0			1	1	1	0	0
Cyperaceae																														0	0	0	0	0	0	0	0	0	0	0	0			0	0	0	0	0
Drosera																														0	0	0	0	0	0	0	0	0	0	0	0			0	0	0	0	0
Echinodorus	Echinodorus												1																	0	0	1	0	0	0	0	0	0	0	0	0			1	0	0	0	0
Ericaceae	Ericaceae																							1	1	1		1		0	0	0	0	0	2	0	2	1	0	0	3			0	0	3	3	0
Eriocaulon	Eriocaulaceae Eriocaulon																		1											0	0	0	0	0	0	0	0	1	0	0	1			0	0	0	1	0
Erythrina	Erythrina							1																						0	1	1	0	1	0	1	0	0	0	0	0			1	1	0	0	0
Ficus	Ficus				1																									1	0	0	1	0	0	0	0	0	0	0	0			1	1	0	0	0
Gallesia	Gallesia							1																						0	1	1	0	1	0	1	0	0	0	0	0			1	1	0	0	0
Gomphrena	Amaranthaceae / Chenopodiaceae																	1												0	0	0	0	0	0	0	0	0	1	1	0			0	0	0	1	1
Ilex	Ilex				1	1																								2	1	0	1	0	0	0	0	0	0	0	0			2	1	0	0	0
Indeterminable																														0	0	0	0	0	0	0	0	0	0	0	0			0	0	0	0	0
Lithraea	Lithraea												1																	0	0	1	0	0	0	0	0	0	0	0	0			1	0	0	0	0
Lycopodiaceae																														0	0	0	0	0	0	0	0	0	0	0	0			0	0	0	0	0
Lythraceae undiff.	Lithraea												1																	0	0	1	0	0	0	0	0	0	0	0	0			1	0	0	0	0
Mabea	Mabea				1																									1	0	0	1	0	0	0	0	0	0	0	0			1	1	0	0	0
Matayba	Matayba				1																1									1	0	0	2	1	1	1	1	0	0	0	0			1	2	1	0	0
Meliaceae/Sapotaceae undiff.	Meliaceae				1			1													1			1						1	1	1	2	2	2	2	2	0	0	0	0			2	3	2	0	0
Miconia	Miconia				1	1							1																	2	1	1	1	0	0	0	0	0	0	0	0			3	1	0	0	0
Mimosaceae undiff.	Mimosa							1													1									0	1	1	1	2	1	2	1	0	0	0	0			1	2	1	0	0
Moraceae (diporate)	Moraceae				1	1																								2	1	0	1	0	0	0	0	0	0	0	0			2	1	0	0	0
Moraceae (triporate)	Moraceae				1	1																								2	1	0	1	0	0	0	0	0	0	0	0			2	1	0	0	0
Myroxylon-type	Flacourtiaceae				1																									1	0	0	1	0	0	0	0	0	0	0	0			1	1	0	0	0
Myrsine	Myrsin				1																									1	0	0	1	0	0	0	0	0	0	0	0			1	1	0	0	0
Myrtaceae undiff.	Myrtaceae				1	1																		1						2	1	0	1	0	1	0	1	0	0	0	0			2	1	1	0	0
Onagraceae	Onagraceae															1	1													1	1	1	1	1	1	1	1	0	0	0	0			1	1	1	0	0
Pediastrum																														0	0	0	0	0	0	0	0	0	0	0	0			0	0	0	0	0
Plantago	Plantago																1	1	1	1										0	0	0	1	1	1	1	1	2	1	1	1			0	1	1	3	1
Poaceae	Poaceae	1																												0	0	0	0	0	0	0	0	0	0	0	0			0	0	0	0	0
Podocarpus	Podocarpus									1	1																			0	0	0	1	1	1	0	1	0	0	0	0			0	1	1	0	0
Poiretia	Rubiaceae				1		1									1	1	1	1											2	2	1	3	1	1	1	1	1	1	1	1			3	3	1	2	1
Polygala	Polygala												1			1	1													1	1	2	1	1	1	1	1	0	0	0	0			2	1	1	0	0
Polygonum																														0	0	0	0	0	0	0	0	0	0	0	0			0	0	0	0	0
Polypodium																														0	0	0	0	0	0	0	0	0	0	0	0			0	0	0	0	0
Psidium																														0	0	0	0	0	0	0	0	0	0	0	0			0	0	0	0	0
Rutaceae undiff.	Rutaceae						1	1																						0	2	1	1	1	0	1	0	0	0	0	0			2	2	0	0	0
Sclerolobium	Leguminoseae/Fabaceae				1	1	1																							2	2	0	2	0	0	0	0	0	0	0	0			3	2	0	0	0
Sloanea	Sloanea				1								1																	1	0	1	1	0	0	0	0	0	0	0	0			2	1	0	0	0
Solanum	Solanaceae				1								1								1			1						1	0	1	2	1	2	1	2	0	0	0	0			2	2	2	0	0
Sphagnum																														0	0	0	0	0	0	0	0	0	0	0	0			0	0	0	0	0
Spore (monolete) undiff.																														0	0	0	0	0	0	0	0	0	0	0	0			0	0	0	0	0
Spore (monolete, reticulate)																														0	0	0	0	0	0	0	0	0	0	0	0			0	0	0	0	0
Spore (striate)																														0	0	0	0	0	0	0	0	0	0	0	0			0	0	0	0	0
Spore (trilete) undiff.																														0	0	0	0	0	0	0	0	0	0	0	0			0	0	0	0	0
Spore (trilete, reticulate)																														0	0	0	0	0	0	0	0	0	0	0	0			0	0	0	0	0
Symplocos	Symplocos						1	1																						0	2	1	1	1	0	1	0	0	0	0	0			2	2	0	0	0
Tecoma	Tecoma						1						1																	0	1	1	1	0	0	0	0	0	0	0	0			2	1	0	0	0
Typha																														0	0	0	0	0	0	0	0	0	0	0	0			0	0	0	0	0
Unknown (dicolpate reticulate longiaxe)																														0	0	0	0	0	0	0	0	0	0	0	0			0	0	0	0	0
Unknown (tricolpate)																														0	0	0	0	0	0	0	0	0	0	0	0			0	0	0	0	0
Urticales undiff.																														0	0	0	0	0	0	0	0	0	0	0	0			0	0	0	0	0
Utricularia																														0	0	0	0	0	0	0	0	0	0	0	0			0	0	0	0	0
Xyris	Xyris														1		1	1												0	0	1	1	1	1	1	1	0	1	2	0			1	1	1	1	2
Zanthoxylum	Zanthoxylum						1	1																						0	2	1	1	1	0	1	0	0	0	0	0			2	2	0	0	0
[truncated: 11 more columns]

## Sheet: Tititaka
		Plant functional types																												BIOMES
		Graminoid	Mangrove	Tree fern	Tropical broad-leaved evergreen tree	Tropical xeric broad-leved evergreen tree	Tropical rain green tree	Dry tropical rain green tree	Cold temperate conifer	Cool temperate conifer	Maritime evergreen conifer	Eurythermic conifer	Tropical xerophytic tree/shrub	Desert shrub	Xerophytic forb	Tropical forb	Temperate forb	Eurythermic forb	Arctic forb	Cushion forb	Warm temperate evergreen broad-leaved tree	Temperate summer green tree	Temperate evergreen broad-leaved tree	Temperate cool deciduous broad-leaved tree	Temperate cold-deciduous broad-leaved tree	Arctic shrub	Warm temperate conifer	Heath		Tropical rainforest	Tropical seaonal forest	Tropical dry forest	Warm temperate rainforest	Warm temperate evergreen broadleaf forest	Cool temperate rainforest	Warm temperate rainforest	Cool mixed forest	Cool grass-lands	Steppe	Desert	Cool grass shrublands			MEGABIOMES
		g	man	tx	Te1	Te2	Tr1	Tr2	ctc	ctc1	ctc2	ec	txts	ds	df	tf	tef	sf	af	cp	wte	ts	ts1	wte1	wte4	aa	wtc	h		TRFO	TSFO	TDFO	WTRF	WEFO	CRTF	WAMF	COMI	CGSS	STEP	DESE	CGSH			tropical forest	warm-temperate forest	temperate forest	grassland and dry shrubland	desert
Alismataceae	Alismataceae															1														1	1	1	0	0	0	0	0	0	0	0	0			1	0	0	0	0
Alnus	Alnus																					1		1						0	0	0	0	0	1	1	2	0	0	0	0			0	1	2	0	0
Amaranthaceae	Amaranthaceae / Chenopodiaceae																	1												0	0	0	0	0	0	0	0	0	1	1	0			0	0	0	1	1
Anacardiaceae	Anacardiaceae						1	1																						0	2	1	1	1	0	1	0	0	0	0	0			2	2	0	0	0
Apiaceae	Apiaceae																1			1										0	0	0	1	1	1	1	1	1	0	0	0			0	1	1	1	0
Apocynaceae	Apocynaceae				1	1		1																						2	2	1	1	1	0	1	0	0	0	0	0			3	2	0	0	0
Asteraceae	Asteraceae															1		1							1	1		1		1	1	1	0	0	1	0	1	1	1	1	3			1	0	2	4	1
Asteraceae (Type 1)	Asteraceae															1		1							1	1		1		1	1	1	0	0	1	0	1	1	1	1	3			1	0	2	4	1
Asteraceae (Type 10)	Asteraceae															1		1							1	1		1		1	1	1	0	0	1	0	1	1	1	1	3			1	0	2	4	1
Asteraceae (Type 13)	Asteraceae															1		1							1	1		1		1	1	1	0	0	1	0	1	1	1	1	3			1	0	2	4	1
Asteraceae (Type 14)	Asteraceae															1		1							1	1		1		1	1	1	0	0	1	0	1	1	1	1	3			1	0	2	4	1
Asteraceae (Type 16)	Asteraceae															1		1							1	1		1		1	1	1	0	0	1	0	1	1	1	1	3			1	0	2	4	1
Asteraceae (Type 19)	Asteraceae															1		1							1	1		1		1	1	1	0	0	1	0	1	1	1	1	3			1	0	2	4	1
Asteraceae (Type 2)	Asteraceae															1		1							1	1		1		1	1	1	0	0	1	0	1	1	1	1	3			1	0	2	4	1
Asteraceae (Type 22)	Asteraceae															1		1							1	1		1		1	1	1	0	0	1	0	1	1	1	1	3			1	0	2	4	1
Asteraceae (Type 25)	Asteraceae															1		1							1	1		1		1	1	1	0	0	1	0	1	1	1	1	3			1	0	2	4	1
Asteraceae (Type 3)	Asteraceae															1		1							1	1		1		1	1	1	0	0	1	0	1	1	1	1	3			1	0	2	4	1
Asteraceae (Type 31)	Asteraceae															1		1							1	1		1		1	1	1	0	0	1	0	1	1	1	1	3			1	0	2	4	1
Asteraceae (Type 4)	Asteraceae															1		1							1	1		1		1	1	1	0	0	1	0	1	1	1	1	3			1	0	2	4	1
Asteraceae (Type 6)	Asteraceae															1		1							1	1		1		1	1	1	0	0	1	0	1	1	1	1	3			1	0	2	4	1
Asteraceae (Type 7)	Asteraceae															1		1							1	1		1		1	1	1	0	0	1	0	1	1	1	1	3			1	0	2	4	1
Asteraceae (Type 8)	Asteraceae															1		1							1	1		1		1	1	1	0	0	1	0	1	1	1	1	3			1	0	2	4	1
Asteraceae (Type 9)	Asteraceae															1		1							1	1		1		1	1	1	0	0	1	0	1	1	1	1	3			1	0	2	4	1
Asteraceae (Type Ambrosia)	Asteraceae															1		1							1	1		1		1	1	1	0	0	1	0	1	1	1	1	3			1	0	2	4	1
Asteraceae (Type Ardisia)	Asteraceae															1		1							1	1		1		1	1	1	0	0	1	0	1	1	1	1	3			1	0	2	4	1
Asteraceae (Type Franseria)	Asteraceae															1		1							1	1		1		1	1	1	0	0	1	0	1	1	1	1	3			1	0	2	4	1
Brassicaceae	Brassicaceae															1	1													1	1	1	1	1	1	1	1	0	0	0	0			1	1	1	0	0
Caryophyllaceae	Caryophyllaceae															1		1	1											1	1	1	0	0	0	0	0	1	1	1	1			1	0	0	2	1
Chenopodiaceae																														0	0	0	0	0	0	0	0	0	0	0	0			0	0	0	0	0
Clethraceae	Clethra																							1	1					0	0	0	0	0	1	0	2	0	0	0	1			0	0	2	1	0
Clusiaceae	Clusia												1								1									0	0	1	1	1	1	1	1	0	0	0	0			1	1	1	0	0
Commelinaceae																														0	0	0	0	0	0	0	0	0	0	0	0			0	0	0	0	0
Cunoniaceae	Cunoniaceae				1																									1	0	0	1	0	0	0	0	0	0	0	0			1	1	0	0	0
Cyperaceae																														0	0	0	0	0	0	0	0	0	0	0	0			0	0	0	0	0
Ephedra	Ephedra													1	1											1				0	0	1	0	0	0	0	0	1	0	1	1			1	0	0	1	1
Ericaceae	Ericaceae																							1	1	1		1		0	0	0	0	0	2	0	2	1	0	0	3			0	0	3	3	0
Euphorbiaceae	Euphorbiaceae															1	1	1												1	1	1	1	1	1	1	1	0	1	1	0			1	1	1	1	1
Euphorbiaceae (c.f. Alchornea)	Alchornea				1			1																						1	1	1	1	1	0	1	0	0	0	0	0			2	2	0	0	0
Euphorbiaceae (c.f. Alcalpha)	Euphorbiaceae															1	1	1												1	1	1	1	1	1	1	1	0	1	1	0			1	1	1	1	1
Gentianaceae	Gentianaceae																									1				0	0	0	0	0	0	0	0	1	0	0	1			0	0	0	1	0
Gerianaceae	Geraniaceae															1		1			1			1						1	1	1	1	1	2	1	2	0	1	1	0			1	1	2	1	1
Hedyosmum	Hedyosmum																				1			1						0	0	0	1	1	2	1	2	0	0	0	0			0	1	2	0	0
Ilex	Ilex				1	1																								2	1	0	1	0	0	0	0	0	0	0	0			2	1	0	0	0
Iridaceae	Iridaceae																1	1	1											0	0	0	1	1	1	1	1	1	1	1	1			0	1	1	2	1
Malvaceae	malvaceae						1	1									1													0	2	1	2	2	1	2	1	0	0	0	0			2	3	1	0	0
Melastomataceae	Melastomataceae				1	1		1													1									2	2	1	2	2	1	2	1	0	0	0	0			3	3	1	0	0
Mimosaceae	Mimosa							1													1									0	1	1	1	2	1	2	1	0	0	0	0			1	2	1	0	0
Myricaceae																														0	0	0	0	0	0	0	0	0	0	0	0			0	0	0	0	0
Myrtaceae	Myrtaceae				1	1																		1						2	1	0	1	0	1	0	1	0	0	0	0			2	1	1	0	0
Passifloriaceae	Passiflora				1	1		1																						2	2	1	1	1	0	1	0	0	0	0	0			3	2	0	0	0
Plantago	Plantago																1	1	1	1										0	0	0	1	1	1	1	1	2	1	1	1			0	1	1	3	1
Poaceae	Poaceae	1																												0	0	0	0	0	0	0	0	0	0	0	0			0	0	0	0	0
Podocarpus	Podocarpus									1	1																			0	0	0	1	1	1	0	1	0	0	0	0			0	1	1	0	0
Polygonaceae (c.f. Rumex)	Rumex																1		1											0	0	0	1	1	1	1	1	1	0	0	1			0	1	1	1	0
Ranunculaceae	Ranunculaceae																1	1												0	0	0	1	1	1	1	1	0	1	1	0			0	1	1	1	1
Rosaceae (c.f. Polylepis/Acaena)	Polylepis-Acaena												1												1					0	0	1	0	0	0	0	1	0	0	0	1			1	0	1	1	0
Rubiaceae	Rubiaceae				1		1									1	1	1	1											2	2	1	3	1	1	1	1	1	1	1	1			3	3	1	2	1
Scrophulariaceae	Scrophulariaceae																1		1											0	0	0	1	1	1	1	1	1	0	0	1			0	1	1	1	0
Solanaceae	Solanaceae				1								1								1			1						1	0	1	2	1	2	1	2	0	0	0	0			2	2	2	0	0
Urticaceae/Moraceae	Urticaceae															1	1	1												1	1	1	1	1	1	1	1	0	1	1	0			1	1	1	1	1
Other																														0	0	0	0	0	0	0	0	0	0	0	0			0	0	0	0	0
Cyathea	Cyathea			1																										1	1	0	1	1	1	0	0	0	0	0	0			1	1	1	0	0
[truncated: 11 more columns]

## Sheet: Uyuni
		Plant functional types																												BIOMES
		Graminoid	Mangrove	Tree fern	Tropical broad-leaved evergreen tree	Tropical xeric broad-leved evergreen tree	Tropical rain green tree	Dry tropical rain green tree	Cold temperate conifer	Cool temperate conifer	Maritime evergreen conifer	Eurythermic conifer	Tropical xerophytic tree/shrub	Desert shrub	Xerophytic forb	Tropical forb	Temperate forb	Eurythermic forb	Arctic forb	Cushion forb	Warm temperate evergreen broad-leaved tree	Temperate summer green tree	Temperate evergreen broad-leaved tree	Temperate cool deciduous broad-leaved tree	Temperate cold-deciduous broad-leaved tree	Arctic shrub	Warm temperate conifer	Heath		Tropical rainforest	Tropical seaonal forest	Tropical dry forest	Warm temperate rainforest	Warm temperate evergreen broadleaf forest	Cool temperate rainforest	Warm temperate rainforest	Cool mixed forest	Cool grass-lands	Steppe	Desert	Cool grass shrublands			MEGABIOMES
		g	man	tx	Te1	Te2	Tr1	Tr2	ctc	ctc1	ctc2	ec	txts	ds	df	tf	tef	sf	af	cp	wte	ts	ts1	wte1	wte4	aa	wtc	h		TRFO	TSFO	TDFO	WTRF	WEFO	CRTF	WAMF	COMI	CGSS	STEP	DESE	CGSH			tropical forest	warm-temperate forest	temperate forest	grassland and dry shrubland	desert
Acalypha	Acalypha															1	1													1	1	1	1	1	1	1	1	0	0	0	0			1	1	1	0	0
Alnus	Alnus																					1		1						0	0	0	0	0	1	1	2	0	0	0	0			0	1	2	0	0
Ambrosia	Asteraceae															1		1							1	1		1		1	1	1	0	0	1	0	1	1	1	1	3			1	0	2	4	1
Apiaceae	Apiaceae																1			1										0	0	0	1	1	1	1	1	1	0	0	0			0	1	1	1	0
Asteraceae	Asteraceae															1		1							1	1		1		1	1	1	0	0	1	0	1	1	1	1	3			1	0	2	4	1
Brassicaceae	Brassicaceae															1	1													1	1	1	1	1	1	1	1	0	0	0	0			1	1	1	0	0
c.f. Calitriche																														0	0	0	0	0	0	0	0	0	0	0	0			0	0	0	0	0
Caryophyllaceae	Caryophyllaceae															1		1	1											1	1	1	0	0	0	0	0	1	1	1	1			1	0	0	2	1
Chenopodiaceae	Amaranthaceae / Chenopodiaceae																	1												0	0	0	0	0	0	0	0	0	1	1	0			0	0	0	1	1
Cyperaceae																														0	0	0	0	0	0	0	0	0	0	0	0			0	0	0	0	0
Dodanaea	Dodonaea												1											1	1					0	0	1	0	0	1	0	2	0	0	0	1			1	0	2	1	0
Ephedra	Ephedra													1	1											1				0	0	1	0	0	0	0	0	1	0	1	1			1	0	0	1	1
Filicales																														0	0	0	0	0	0	0	0	0	0	0	0			0	0	0	0	0
Gomphrena	Gomphorena															1		1												1	1	1	0	0	0	0	0	0	1	1	0			1	0	0	1	1
Isoetes																														0	0	0	0	0	0	0	0	0	0	0	0			0	0	0	0	0
Juncaginaceae																														0	0	0	0	0	0	0	0	0	0	0	0			0	0	0	0	0
Moraceae/Urticaceae																														0	0	0	0	0	0	0	0	0	0	0	0			0	0	0	0	0
Myrica	Myrica																				1	1								0	0	0	1	1	1	2	2	0	0	0	0			0	2	2	0	0
Myriophyllum																														0	0	0	0	0	0	0	0	0	0	0	0			0	0	0	0	0
Myrtaceae	Myrtaceae				1	1																		1						2	1	0	1	0	1	0	1	0	0	0	0			2	1	1	0	0
Papilionaceae																														0	0	0	0	0	0	0	0	0	0	0	0			0	0	0	0	0
Pediastrum																														0	0	0	0	0	0	0	0	0	0	0	0			0	0	0	0	0
Plantago undiff.	Plantago																1	1	1	1										0	0	0	1	1	1	1	1	2	1	1	1			0	1	1	3	1
Poaceae	Poaceae	1																												0	0	0	0	0	0	0	0	0	0	0	0			0	0	0	0	0
Podocarpus	Podocarpus									1	1																			0	0	0	1	1	1	0	1	0	0	0	0			0	1	1	0	0
Polylepis/Acaena	Polylepis-Acaena												1												1					0	0	1	0	0	0	0	1	0	0	0	1			1	0	1	1	0
Solanaceae	Solanaceae				1								1								1			1						1	0	1	2	1	2	1	2	0	0	0	0			2	2	2	0	0
Symplocus	Symplocos						1	1																						0	2	1	1	1	0	1	0	0	0	0	0			2	2	0	0	0
Unknown																														0	0	0	0	0	0	0	0	0	0	0	0			0	0	0	0	0
Valeriana	Valeriana																		1											0	0	0	0	0	0	0	0	1	0	0	1			0	0	0	1	0
[truncated: 11 more columns]

## Sheet: Petén-Itzá
		Plant functional types																												BIOMES
		Graminoid	Mangrove	Tree fern	Tropical broad-leaved evergreen tree	Tropical xeric broad-leved evergreen tree	Tropical rain green tree	Dry tropical rain green tree	Cold temperate conifer	Cool temperate conifer	Maritime evergreen conifer	Eurythermic conifer	Tropical xerophytic tree/shrub	Desert shrub	Xerophytic forb	Tropical forb	Temperate forb	Eurythermic forb	Arctic forb	Cushion forb	Warm temperate evergreen broad-leaved tree	Temperate summer green tree	Temperate evergreen broad-leaved tree	Temperate cool deciduous broad-leaved tree	Temperate cold-deciduous broad-leaved tree	Arctic shrub	Warm temperate conifer	Heath		Tropical rainforest	Tropical seaonal forest	Tropical dry forest	Warm temperate rainforest	Warm temperate evergreen broadleaf forest	Cool temperate rainforest	Warm temperate rainforest	Cool mixed forest	Cool grass-lands	Steppe	Desert	Cool grass shrublands			MEGABIOMES
		g	man	tx	Te1	Te2	Tr1	Tr2	ctc	ctc1	ctc2	ec	txts	ds	df	tf	tef	sf	af	cp	wte	ts	ts1	wte1	wte4	aa	wtc	h		TRFO	TSFO	TDFO	WTRF	WEFO	CRTF	WAMF	COMI	CGSS	STEP	DESE	CGSH			tropical forest	warm-temperate forest	temperate forest	grassland and dry shrubland	desert
Acacia	Acacia					1		1					1																	1	2	2	0	1	0	1	0	0	0	0	0			3	1	0	0	0
Acalypha	Acalypha															1	1													1	1	1	1	1	1	1	1	0	0	0	0			1	1	1	0	0
Acanthaceae	Acanthaceae															1	1													1	1	1	1	1	1	1	1	0	0	0	0			1	1	1	0	0
Aciotis	Melastomataceae				1	1		1													1									2	2	1	2	2	1	2	1	0	0	0	0			3	3	1	0	0
Aegiphila	Aegiphila					1															1			1						1	1	0	1	1	2	1	2	0	0	0	0			1	1	2	0	0
Aff Atronium
Aff Colubrina	Rhamnaceae							1					1																	0	1	2	0	1	0	1	0	0	0	0	0			2	1	0	0	0
Aff Dalechampia	Euphorbiaceae															1	1	1												1	1	1	1	1	1	1	1	0	1	1	0			1	1	1	1	1
Aff Fissiclyx
Aff Gaylussacia	Ericaceae																							1	1	1		1		0	0	0	0	0	2	0	2	1	0	0	3			0	0	3	3	0
Aff Malvaceae	malvaceae						1	1									1													0	2	1	2	2	1	2	1	0	0	0	0			2	3	1	0	0
Aff Melanoxylon	Fabaceae															1	1	1												1	1	1	1	1	1	1	1	0	1	1	0			1	1	1	1	1
Aff Posoqueria	Rubiaceae				1		1									1	1	1	1											2	2	1	3	1	1	1	1	1	1	1	1			3	3	1	2	1
Aff Trichilia	Trichilia				1																1									1	0	0	2	1	1	1	1	0	0	0	0			1	2	1	0	0
Aff Triumpheta	Triumfetta															1	1													1	1	1	1	1	1	1	1	0	0	0	0			1	1	1	0	0
Alchornea	Alchornea				1			1																						1	1	1	1	1	0	1	0	0	0	0	0			2	2	0	0	0
Allophyllus	Allophylus																				1									0	0	0	1	1	1	1	1	0	0	0	0			0	1	1	0	0
Alnus	Alnus																					1		1						0	0	0	0	0	1	1	2	0	0	0	0			0	1	2	0	0
Alternanthera	Alternanthera														1			1												0	0	1	0	0	0	0	0	0	1	2	0			1	0	0	1	2
Amaryllidaceae
Ambrosia	Asteraceae															1		1							1	1		1		1	1	1	0	0	1	0	1	1	1	1	3			1	0	2	4	1
Anacardium	Anacardiaceae						1	1																						0	2	1	1	1	0	1	0	0	0	0	0			2	2	0	0	0
Anthodon	Celastraceae							1																1						0	1	1	0	1	1	1	1	0	0	0	0			1	1	1	0	0
Apiaceae	Apiaceae																1			1										0	0	0	1	1	1	1	1	1	0	0	0			0	1	1	1	0
Apocynaceae	Apocynaceae				1	1		1																						2	2	1	1	1	0	1	0	0	0	0	0			3	2	0	0	0
Araliaceae
Arecaceae	Arecaceae				1																			1						1	0	0	1	0	1	0	1	0	0	0	0			1	1	1	0	0
Asteraceae luguliflora	Asteraceae															1		1							1	1		1		1	1	1	0	0	1	0	1	1	1	1	3			1	0	2	4	1
Asteraceae tubuliflora	Asteraceae															1		1							1	1		1		1	1	1	0	0	1	0	1	1	1	1	3			1	0	2	4	1
Banara	Banara																							1						0	0	0	0	0	1	0	1	0	0	0	0			0	0	1	0	0
Begonia	Begonia															1														1	1	1	0	0	0	0	0	0	0	0	0			1	0	0	0	0
Bignoniaceae	Bignoniaceae				1																									1	0	0	1	0	0	0	0	0	0	0	0			1	1	0	0	0
Blepharandra	Malpighiaceae				1		1						1								1									1	1	1	3	1	1	1	1	0	0	0	0			3	3	1	0	0
Bombacaceae	Bombacaceae				1		1	1																						1	2	1	2	1	0	1	0	0	0	0	0			3	3	0	0	0
Borreria	Borreria																1	1	1
Brassicaceae	Brassicaceae															1	1													1	1	1	1	1	1	1	1	0	0	0	0			1	1	1	0	0
Brosimum	Brosimum				1	1		1																						2	2	1	1	1	0	1	0	0	0	0	0			3	2	0	0	0
Bursera	Bursera							1					1																	0	1	2	0	1	0	1	0	0	0	0	0			2	1	0	0	0
Buxus
Byrsonima	Byrsonima							1					1																	0	1	2	0	1	0	1	0	0	0	0	0			2	1	0	0	0
Cactaceae	Cactaceae												1	1
Caesalpinia	Caesalpinea						1	1																						0	2	1	1	1	0	1	0	0	0	0	0			2	2	0	0	0
Caryocar	Caryocar												1																	0	0	1	0	0	0	0	0	0	0	0	0			1	0	0	0	0
Caryodendron	Euphorbiaceae															1	1	1												1	1	1	1	1	1	1	1	0	1	1	0			1	1	1	1	1
Casearia	Cesearia type						1																							0	1	0	1	0	0	0	0	0	0	0	0			1	1	0	0	0
Cassia	Cassia															1	1													1	1	1	1	1	1	1	1	0	0	0	0			1	1	1	0	0
Casuarina
Cayaponia	Cayaponia												1									1								0	0	1	0	0	0	1	1	0	0	0	0			1	1	1	0	0
Cecropia	Cecropia				1	1																								2	1	0	1	0	0	0	0	0	0	0	0			2	1	0	0	0
Celtis	Celtis				1	1																								2	1	0	1	0	0	0	0	0	0	0	0			2	1	0	0	0
Centropogon	Campanulaceae																		1					1						0	0	0	0	0	1	0	1	1	0	0	1			0	0	1	1	0
Ceratophytum	Bignoniaceae				1																									1	0	0	1	0	0	0	0	0	0	0	0			1	1	0	0	0
Chenop-Amaranthaceae	Amaranthaceae / Chenopodiaceae																	1												0	0	0	0	0	0	0	0	0	1	1	0			0	0	0	1	1
Cissus	Cissus												1																	0	0	1	0	0	0	0	0	0	0	0	0			1	0	0	0	0
Combretum	Combretaceae					1		1					1																	1	2	2	0	1	0	1	0	0	0	0	0			3	1	0	0	0
Commiphora
Connarus	Connarus																	1												0	0	0	0	0	0	0	0	0	1	1	0			0	0	0	1	1
Convolvulacea	Convolvulaceae												1																	0	0	1	0	0	0	0	0	0	0	0	0			1	0	0	0	0
Cordia	Cordia							1					1																	0	1	2	0	1	0	1	0	0	0	0	0			2	1	0	0	0
Croton	Croton					1															1									1	1	0	1	1	1	1	1	0	0	0	0			1	1	1	0	0
Cucurbitaceae	Cucurbitaceae				1	1																								2	1	0	1	0	0	0	0	0	0	0	0			2	1	0	0	0
Cupania
Dalbergia	Dalbergia				1	1																								2	1	0	1	0	0	0	0	0	0	0	0			2	1	0	0	0
Dalea	Fabaceae															1	1	1												1	1	1	1	1	1	1	1	0	1	1	0			1	1	1	1	1
Dendropanax
Dodonaea	Dodonaea												1											1	1
Dolliocarpus	Doliocarpus				1																									1	0	0	1	0	0	0	0	0	0	0	0			1	1	0	0	0
Drymaria	Caryophyllaceae															1		1	1											1	1	1	0	0	0	0	0	1	1	1	1			1	0	0	2	1
Ericaceae	Ericaceae																							1	1	1		1		0	0	0	0	0	2	0	2	1	0	0	3			0	0	3	3	0
Eugenia	Eugenia																						1
Euphorbiaceae	Euphorbiaceae															1	1	1												1	1	1	1	1	1	1	1	0	1	1	0			1	1	1	1	1
Fabaceae	Fabaceae															1	1	1												1	1	1	1	1	1	1	1	0	1	1	0			1	1	1	1	1
Faramea	Rubiaceae				1		1									1	1	1	1											2	2	1	3	1	1	1	1	1	1	1	1			3	3	1	2	1
Ficus	Ficus				1																									1	0	0	1	0	0	0	0	0	0	0	0			1	1	0	0	0
Genipa	Genipa																1													0	0	0	1	1	1	1	1	0	0	0	0			0	1	1	0	0
Gouania	Rhamnaceae							1					1																	0	1	2	0	1	0	1	0	0	0	0	0			2	1	0	0	0
Guettarda	Guettardia																				1									0	0	0	1	1	1	1	1	0	0	0	0			0	1	1	0	0
Gustavia	Lecythidaceae				1		1																							1	1	0	2	0	0	0	0	0	0	0	0			2	2	0	0	0
Gymnanthes	Euphorbiaceae															1	1	1												1	1	1	1	1	1	1	1	0	1	1	0			1	1	1	1	1
Hedyosmum	Hedyosmum																				1			1						0	0	0	1	1	2	1	2	0	0	0	0			0	1	2	0	0
Heisteria
Hevea	Euphorbiaceae															1	1	1												1	1	1	1	1	1	1	1	0	1	1	0			1	1	1	1	1
Hyeronima	Euphorbiaceae															1	1	1												1	1	1	1	1	1	1	1	0	1	1	0			1	1	1	1	1
Hymenaea	Fabaceae															1	1	1												1	1	1	1	1	1	1	1	0	1	1	0			1	1	1	1	1
Hyptis	Hyptis												1																	0	0	1	0	0	0	0	0	0	0	0	0			1	0	0	0	0
Ilex	Ilex				1	1																								2	1	0	1	0	0	0	0	0	0	0	0			2	1	0	0	0
Inga	Inga				1																									1	0	0	1	0	0	0	0	0	0	0	0			1	1	0	0	0
Iresine	Iresine															1														1	1	1	0	0	0	0	0	0	0	0	0			1	0	0	0	0
Juglans	Juglans																					1
Justicia	Justicia															1	1	1												1	1	1	1	1	1	1	1	0	1	1	0			1	1	1	1	1
Lamiaceae	Lamiaceae															1	1	1	1											1	1	1	1	1	1	1	1	1	1	1	1			1	1	1	2	1
Lauraceae
Licania	Licania				1																									1	0	0	1	0	0	0	0	0	0	0	0			1	1	0	0	0
Liliaceae	Liliaceae															1	1	1												1	1	1	1	1	1	1	1	0	1	1	0			1	1	1	1	1
Lindernia
Liquidambar	Liquidambar															1		1	1				1							1	1	1	0	0	0	0	0	1	1	1	1			1	0	0	2	1
Loranthaceae	Loranthaceae						1	1													1	1		1						0	2	1	2	2	2	3	3	0	0	0	0			2	4	3	0	0
Loxopterigium	Anacardiaceae						1	1																						0	2	1	1	1	0	1	0	0	0	0	0			2	2	0	0	0
Ludwigia	Ludwigia																				1			1						0	0	0	1	1	2	1	2	0	0	0	0			0	1	2	0	0
Machaerium	Macharium				1		1																							1	1	0	2	0	0	0	0	0	0	0	0			2	2	0	0	0
Malpighiaceae	Malpighiaceae				1		1						1								1									1	1	1	3	1	1	1	1	0	0	0	0			3	3	1	0	0
Malvaceae	malvaceae						1	1									1													0	2	1	2	2	1	2	1	0	0	0	0			2	3	1	0	0
Mandevilla	Apocynaceae				1	1		1																						2	2	1	1	1	0	1	0	0	0	0	0			3	2	0	0	0
Maripa	Maripa				1																									1	0	0	1	0	0	0	0	0	0	0	0			1	1	0	0	0
Mecardonia
Melastomataceae	Melastomataceae				1	1		1													1									2	2	1	2	2	1	2	1	0	0	0	0			3	3	1	0	0
Meliaceae	Meliaceae				1			1													1			1						1	1	1	2	2	2	2	2	0	0	0	0			2	3	2	0	0
Mimosa	Mimosa							1													1									0	1	1	1	2	1	2	1	0	0	0	0			1	2	1	0	0
Myrica	Myrica																				1	1								0	0	0	1	1	1	2	2	0	0	0	0			0	2	2	0	0
Myrsine	Myrsin				1																									1	0	0	1	0	0	0	0	0	0	0	0			1	1	0	0	0
Myrtaceae	Myrtaceae				1	1																		1						2	1	0	1	0	1	0	1	0	0	0	0			2	1	1	0	0
Olacaceae
Oxalidaceae
Passiflora	Passiflora				1	1		1
Paullinia
Peltogyne	Leguminoseae/Fabaceae				1	1	1																							2	2	0	2	0	0	0	0	0	0	0	0			3	2	0	0	0
Petiveria
Phyllanthus	Phyllanthus												1																	0	0	1	0	0	0	0	0	0	0	0	0			1	0	0	0	0
Physalis	Physalis																	1												0	0	0	0	0	0	0	0	0	1	1	0			0	0	0	1	1
Picea
Piper	Piper						1	1																						0	2	1	1	1	0	1	0	0	0	0	0			2	2	0	0	0
Poaceae	Poaceae	1																												0	0	0	0	0	0	0	0	0	0	0	0			0	0	0	0	0
Polygala	Polygala												1			1	1													1	1	2	1	1	1	1	1	0	0	0	0			2	1	1	0	0
Polygonum
Portulacaceae	Portulaccaceae undiff.												1				1													0	0	1	1	1	1	1	1	0	0	0	0			1	1	1	0	0
Prestonia	Apocynaceae				1	1		1																						2	2	1	1	1	0	1	0	0	0	0	0			3	2	0	0	0
Protium	Protium				1			1																						1	1	1	1	1	0	1	0	0	0	0	0			2	2	0	0	0
Psychotria	Psychotria					1	1														1									1	2	0	2	1	1	1	1	0	0	0	0			2	2	1	0	0
Pterocarpus	Fabaceae															1	1	1												1	1	1	1	1	1	1	1	0	1	1	0			1	1	1	1	1
Rheedia
Rubiaceae	Rubiaceae				1		1									1	1	1	1											2	2	1	3	1	1	1	1	1	1	1	1			3	3	1	2	1
Sabiceae
Sagitaria
Salvia	Lamiaceae															1	1	1	1											1	1	1	1	1	1	1	1	1	1	1	1			1	1	1	2	1
Sapotaceae	Sapotaceae				1	1																								2	1	0	1	0	0	0	0	0	0	0	0			2	1	0	0	0
Sapium	Sapium						1	1					1																	0	2	2	1	1	0	1	0	0	0	0	0			3	2	0	0	0
Sebastiana	Sebastiana												1																	0	0	1	0	0	0	0	0	0	0	0	0			1	0	0	0	0
Serjania	Serjania					1							1																	1	1	1	0	0	0	0	0	0	0	0	0			2	0	0	0	0
Schinus	Schinus							1					1																	0	1	2	0	1	0	1	0	0	0	0	0			2	1	0	0	0
Scoparia
Sicydium	Cucurbitaceae				1	1																								2	1	0	1	0	0	0	0	0	0	0	0			2	1	0	0	0
Siparuna	Siparuna						1	1																						0	2	1	1	1	0	1	0	0	0	0	0			2	2	0	0	0
Solanum	Solanaceae				1								1								1			1						1	0	1	2	1	2	1	2	0	0	0	0			2	2	2	0	0
Spondias	Spondias						1	1																						0	2	1	1	1	0	1	0	0	0	0	0			2	2	0	0	0
Stemodia
Strychnos
Syngonium
Syphocampylus	Campanulaceae																		1					1						0	0	0	0	0	1	0	1	1	0	0	1			0	0	1	1	0
Tabebuia	Bignoniaceae				1																									1	0	0	1	0	0	0	0	0	0	0	0			1	1	0	0	0
Theobroma	malvaceae						1	1									1													0	2	1	2	2	1	2	1	0	0	0	0			2	3	1	0	0
Tiliaceae	Tiliaceae				1	1		1
Tournefortia	Boraginaceae					1																								1	1	0	0	0	0	0	0	0	0	0	0			1	0	0	0	0
Tovomita
Toxicodendron	Anacardiaceae						1	1																						0	2	1	1	1	0	1	0	0	0	0	0			2	2	0	0	0
Trema	Trema						1	1														1	1							0	2	1	1	1	0	2	1	0	0	0	0			2	3	1	0	0
Trichanthera	Acanthaceae															1	1													1	1	1	1	1	1	1	1	0	0	0	0			1	1	1	0	0
Trichilia	Trichilia				1																1									1	0	0	2	1	1	1	1	0	0	0	0			1	2	1	0	0
Triplaris
Typha
Ulmus	Ulmaceae																					1								0	0	0	0	0	0	1	1	0	0	0	0			0	1	1	0	0
Unknown I
Unknown II
Unknown XX
Unknown A
Uniknown C
Unknown big-walled
Unknown Z
Virola
Vismia	Vismia				1	1																								2	1	0	1	0	0	0	0	0	0	0	0			2	1	0	0	0
Vitex	Lamiaceae															1	1	1	1											1	1	1	1	1	1	1	1	1	1	1	1			1	1	1	2	1
Vitis	Vismia				1	1																								2	1	0	1	0	0	0	0	0	0	0	0			2	1	0	0	0
Zanthoxylum	Zanthoxylum						1	1																						0	2	1	1	1	0	1	0	0	0	0	0			2	2	0	0	0
Zea	Poaceae	1																												0	0	0	0	0	0	0	0	0	0	0	0			0	0	0	0	0
Moracea	Moraceae				1	1																								2	1	0	1	0	0	0	0	0	0	0	0			2	1	0	0	0
Quercus	Quercus																				1			1						0	0	0	1	1	2	1	2	0	0	0	0			0	1	2	0	0
Pinus	Pinus									1																	1			0	0	0	1	1	1	1	1	0	0	0	0			0	1	1	0	0
Cyperaceae
Acrostichum	Acrostichum type		1																											1	0	0	0	0	0	0	0	0	0	0	0			1	0	0	0	0
Cyathea	Cyathea			1																										1	1	0	1	1	1	0	0	0	0	0	0			1	1	1	0	0
Lycopodium
Monolete gemate
Monolete granulate
Monolete psilate
Monolete rugulate
Monolete scabrate
Monolete striate
Monolete verrucata
Polypodium
Selaginella	Selaginella																1		1											0	0	0	1	1	1	1	1	1	0	0	1			0	1	1	1	0
Spore giant
Trilete clavate
Trilete equinate
Trilete gemmate
Trilete granulate
Trilete perforate
Trilete psilate
Trilete rugulate
Trilete scabrate
Trilete straiate
[truncated: 11 more columns]
