# Supplementary material for: Terrestrial biosphere changes over the last 120 kyr
Source: Copernicus journal article supplement (doi:10.5194/cp-12-51-2016), 2016-01-18
Supplement: Supplementary file 1 [file cp-12-51-2016-supplement.zip › supplement/South_America/LatinAmerica_scores.xls]

## Sheet: Cambara
Sample	Sample age	Sample age (ka), assumed BP	tropical forest	warm-temperate forest	temperate forest	grassland and dry shrubland	desert
0	-50	-0.05	20.3724	33.6292	27.4361	10.9545	2.76823
1	-33.931	-0.033931	19.5306	32.2258	24.4585	7.89796	2.19091
2	-17.8621	-0.0178621	22.4351	33.818	25.1353	10.1974	3.58796
3	-1.7931	-0.0017931	24.4888	38.2436	26.3108	9.12124	3.50523
4	14.2759	0.0142759
5	30.3448	0.0303448	21.1695	33.8653	25.2563	11.4306	5.32123
6	46.4138	0.0464138
7	62.4828	0.0624828	19.2466	31.316	18.9432	8.09059	2.72919
8	78.5517	0.0785517
9	94.6207	0.0946207	18.8286	32.1789	21.1666	9.84453	2.34736
10	110.69	0.11069
11	126.759	0.126759
12	142.828	0.142828	17.0518	28.8597	18.7552	6.31783	2.73795
13	158.897	0.158897
14	174.966	0.174966
15	191.034	0.191034	17.6172	33.9026	24.2955	12.848	3.45629
16	207.103	0.207103
17	223.172	0.223172
18	239.241	0.239241	19.0027	33.9523	21.3737	9.24253	1.12867
19	255.31	0.25531
20	271.379	0.271379
21	287.448	0.287448	19.8148	35.1941	24.4239	9.73235	2.5071
22	303.517	0.303517
23	319.586	0.319586
24	335.655	0.335655	21.6611	37.3444	25.1901	10.6907	3.92283
25	351.724	0.351724
26	367.793	0.367793
27	383.862	0.383862	18.4548	32.29	19.8254	8.10243	3.06519
28	399.931	0.399931
29	416	0.416
30	440.308	0.440308	19.0855	32.175	22.0925	9.56259	4.21099
31	464.615	0.464615
32	488.923	0.488923
33	513.231	0.513231	19.3787	34.4494	20.164	6.01659	2.35113
34	537.538	0.537538
35	561.846	0.561846
36	586.154	0.586154	19.8675	33.3472	18.1812	8.02419	2.73356
37	610.462	0.610462
38	634.769	0.634769
39	659.077	0.659077	18.6517	30.7841	16.6656	7.37372	2.5273
40	683.385	0.683385
41	707.692	0.707692
42	732	0.732	16.5305	30.5432	20.3105	10.227	2.74236
43	756.308	0.756308
44	780.615	0.780615
45	804.923	0.804923	17.3534	30.4774	20.7056	11.917	3.70697
46	829.231	0.829231
47	853.538	0.853538
48	877.846	0.877846	16.6057	27.1338	16.8676	10.0126	3.98696
49	902.154	0.902154
50	926.462	0.926462
51	950.769	0.950769	17.2278	29.6461	19.7831	13.5169	6.25899
52	975.077	0.975077
53	999.385	0.999385
54	1023.69	1.02369	17.7314	29.9154	19.0209	10.9062	3.88166
55	1048	1.048
56	1162.71	1.16271
57	1277.42	1.27742	21.4144	27.8466	19.3364	14.1361	7.40155
58	1392.12	1.39213
59	1506.83	1.50683
60	1621.54	1.62154	17.1137	22.8629	19.0265	14.2918	6.98143
61	1736.25	1.73625
62	1850.96	1.85096
63	1965.67	1.96567	17.1956	24.7225	18.0937	16.0023	7.75932
64	2080.38	2.08038
65	2195.08	2.19508
66	2309.79	2.30979	17.3843	24.5195	18.1945	14.9535	6.80052
67	2424.5	2.4245
68	2539.21	2.53921
69	2653.92	2.65392	15.1452	21.4773	15.2951	13.6584	7.89796
70	2768.62	2.76863
71	2883.33	2.88333
72	2998.04	2.99804	12.7861	19.2377	13.7448	11.9024	6.46957
73	3112.75	3.11275
74	3227.46	3.22746
75	3342.17	3.34217	16.3081	24.0801	17.4613	12.4675	5.12356
76	3456.88	3.45688
77	3571.58	3.57158
78	3686.29	3.68629	15.363	24.7596	18.4324	14.6722	6.48815
79	3801	3.801
80	4059.07	4.05907
82	4575.2	4.5752	18.9674	21.7142	15.0829	11.3609	7.00502
84	5091.33	5.09133
86	5607.47	5.60747
88	6123.6	6.1236	13.4148	16.4162	12.2839	12.1667	8.58628
90	6639.73	6.63973
92	7155.87	7.15587
94	7672	7.672	10.7917	15.8337	13.38	14.5579	9.55
96	8188.13	8.18813
98	8704.27	8.70427	12.4781	16.2701	13.4572	11.1215	6.56226
100	9220.4	9.2204	8.46257	14.4747	14.4408	11.4184	7.73103
102	9736.53	9.73653	8.10798	11.17	10.512	10.1983	5.92653
104	10252.7	10.2527	13.6554	19.0992	16.849	12.7779	8.46662
106	10768.8	10.7688	10.1018	14.154	10.9521	11.1105	7.28333
108	11284.9	11.2849	9.66466	16.4819	15.5891	12.5287	8.30471
110	11801.1	11.8011	11.9472	18.1481	14.1626	15.1014	9.08284
112	12317.2	12.3172	8.71684	16.5967	15.9139	17.3247	10.2487
114	12833.3	12.8333	10.6963	18.7542	18.3742	17.9625	12.0768
116	13349.5	13.3495	11.6036	18.3787	17.4389	17.9385	11.1864
118	13865.6	13.8656	10.1963	17.5864	16.5733	19.6756	12.7314
120	14381.7	14.3817	13.5823	21.0259	17.6185	19.9836	13.3506
122	14897.9	14.8979	10.4242	19.9234	15.0418	19.5464	11.9129
124	15414	15.414	11.8174	19.7025	17.543	21.0637	13.4683
125	15672.1	15.6721	8.52991	18.1227	16.0163	19.9811	11.7934
126	15930.1	15.9301	12.0003	20.8987	18.5239	21.4803	13.7844
127	16188.2	16.1882	9.06913	19.4105	16.7628	19.1859	12.3328
128	16446.3	16.4463	13.2829	19.6162	17.9006	20.3262	14.0278
129	16704.3	16.7043	6.88078	20.0016	17.2413	20.3463	13.0838
130	16962.4	16.9624	10.3531	19.6799	16.6889	18.1225	11.9721
131	17220.5	17.2205	10.8817	17.9651	15.3995	18.1686	11.6397
132	17478.5	17.4785	10.7814	16.7192	13.5177	18.357	11.1124
133	17736.6	17.7366	10.0922	16.9847	16.125	16.9521	11.3019
134	17994.7	17.9947	9.56573	17.6449	15.4056	19.7306	12.4755
135	18252.7	18.2527	8.1107	16.2577	13.8543	16.7964	10.0706
136	18510.8	18.5108	8.55264	16.5246	14.1522	16.8631	10.7518
137	18768.9	18.7689	8.27375	15.2348	12.5743	17.0051	10.2098
138	19026.9	19.0269	8.87333	17.7359	15.1994	18.2773	11.245
139	19285	19.285	9.23036	20.6067	15.7581	20.1595	13.6695
140	19543.1	19.5431	11.1696	22.0222	19.6658	20.2746	13.4368
141	19801.1	19.8011	11.1383	19.8837	15.8557	19.4722	12.5712
142	20059.2	20.0592	10.356	20.131	17.4208	18.6769	11.7161
143	20317.3	20.3173	8.76707	17.1907	16.2933	17.0589	9.96072
144	20575.3	20.5753	10.4583	19.127	18.5248	20.4372	13.6062
145	20833.4	20.8334	9.32613	20.8547	19.4539	19.517	10.9055
146	21091.5	21.0915	11.2788	22.3192	20.7467	21.2998	12.504
147	21349.5	21.3495	10.4879	19.6365	20.1153	20.3584	12.3653
148	21607.6	21.6076	10.305	19.0063	18.5783	17.3233	10.3541
149	21865.7	21.8657	8.45417	19.5677	18.9072	19.6929	10.8154
150	22123.7	22.1237	8.73178	16.6816	15.1482	17.5953	10.1683
151	22381.8	22.3818	9.25926	19.3697	18.4955	21.2074	12.0906
152	22639.9	22.6399	10.3459	19.3263	16.8971	15.6478	8.71406
153	22897.9	22.8979	9.93239	18.9667	19.0211	20.4307	12.0801
154	23156	23.156	11.5475	20.746	17.2713	17.132	10.2787
155	23414.1	23.4141	9.99517	17.885	16.1966	19.5483	10.203
156	23672.1	23.6721	10.4298	19.2165	18.0087	19.2827	10.1619
157	23930.2	23.9302	9.14635	19.7047	17.2097	19.4134	10.8729
158	24188.3	24.1883	10.5246	21.6972	19.8708	18.9377	10.6536
159	24446.3	24.4463	9.75328	16.783	17.7532	17.2281	9.36646
160	24704.4	24.7044	9.01446	18.4823	18.4119	20.1162	13.3858
161	24962.5	24.9625	10.0134	20.5777	18.0899	18.8825	10.3211
162	25220.5	25.2205	11.6443	19.4267	18.7548	17.8311	9.90067
163	25478.6	25.4786	11.3904	18.9875	16.1738	16.8402	9.71981
164	25736.7	25.7367	9.45421	20.6404	20.4765	19.058	11.1839
165	25994.7	25.9947	12.317	21.2064	19.5554	19.1011	11.8207
166	26252.8	26.2528	14.3815	20.6864	17.2818	19.8298	11.4413
167	26510.9	26.5109	13.2843	21.2711	19.7986	19.0794	12.0024
168	26768.9	26.7689	10.91	20.725	19.2947	21.0046	12.7945
169	27027	27.027	12.4121	22.6544	20.6427	20.2573	13.2767
170	27285.1	27.2851	10.6017	20.3855	18.9366	19.7329	11.3703
171	27543.1	27.5431	9.90669	20.9094	17.834	19.1901	10.5795
172	27801.2	27.8012	8.80451	21.8354	21.2475	20.3565	12.8929
173	28059.3	28.0593	9.31478	21.2923	19.9658	19.9838	11.8571
174	28317.3	28.3173	13.6233	21.6515	18.0195	18.1705	10.8259
175	28575.4	28.5754	8.45957	18.2665	16.7296	18.9598	10.5028
176	28833.5	28.8335	9.55223	17.4026	17.4249	18.9722	12.277
177	29091.5	29.0915	10.3425	18.7741	17.3321	17.4424	10.3566
178	29349.6	29.3496	10.7894	20.5279	18.1301	18.744	11.1647
179	29607.7	29.6077	9.10825	24.5441	23.0217	22.0999	13.5238
180	29865.7	29.8657	10.6042	20.4727	18.9724	20.6862	12.0244
181	30123.8	30.1238	12.8864	25.2586	24.2279	22.7311	14.1739
182	30381.9	30.3819	11.0735	19.4751	18.5029	19.8833	12.1307
183	30639.9	30.6399	11.1684	21.3257	20.4188	21.5295	12.9728
184	30898	30.898	10.3514	20.5557	19.9868	17.3175	9.24012
185	31156.1	31.1561	12.0043	21.331	20.1055	18.0666	10.753
186	31414.1	31.4141	10.922	19.0984	19.507	17.853	12.5264
187	31672.2	31.6722	12.2661	22.8123	18.843	19.9765	12.3005
188	31930.3	31.9303	10.5614	19.1436	18.6641	18.5303	11.3724
189	32188.3	32.1883	13.5824	22.2933	21.2059	21.6704	13.2559
190	32446.4	32.4464	12.1457	25.0214	22.9671	20.2176	11.4371
191	32704.5	32.7045	13.7998	23.0153	21.2999	21.6702	12.424
192	32962.5	32.9625	9.31386	20.6801	20.1324	20.2719	11.3184
193	33220.6	33.2206	10.4582	22.0839	20.7965	21.6845	13.0227
194	33478.7	33.4787	11.0771	19.9673	19.8173	19.8173	10.6482
195	33736.7	33.7367	10.8606	17.2532	17.7311	17.7689	11.3246
196	33994.8	33.9948	12.3247	21.2978	18.8714	20.3912	11.3579
197	34252.9	34.2529	11.2666	22.6278	21.4734	19.1016	11.7448
198	34510.9	34.5109	12.4453	22.3039	20.6129	20.85	13.7399
199	34769	34.769	13.424	26.708	24.1683	21.1629	12.0371
200	35027.1	35.0271	14.8663	25.7624	25.1209	20.6318	14.2599
201	35285.1	35.2851	12.9092	23.4871	21.6206	19.794	12.4996
202	35543.2	35.5432	10.1463	21.3102	19.7854	21.5545	12.1892
203	35801.3	35.8013	10.8308	26.7961	24.5744	19.813	11.5893
204	36059.3	36.0593	12.5293	24.6273	23.3977	19.1313	12.0959
205	36317.4	36.3174	14.3399	26.7542	26.1214	20.9284	12.3032
206	36575.5	36.5755	12.3322	22.4167	22.109	20.9875	12.9795
207	36833.5	36.8335	13.8928	26.3185	25.3091	21.1193	12.0677
208	37091.6	37.0916	13.316	25.3762	23.4143	19.6883	12.5987
209	37349.7	37.3497	13.5347	25.4816	24.6414	22.2873	13.3875
210	37607.7	37.6077	14.8839	22.4789	21.8118	20.397	13.21
211	37865.8	37.8658	11.1187	20.7125	21.3727	18.0661	11.2717

## Sheet: Colonia
ech	prof cm	agecal2 (assumed BP)	tropical forest	warm-temperate forest	temperate forest	grassland and dry shrubland	desert
1	1	0	30.2744	27.9587	22.9096	11.9618	6.19002
2	3	0.4	20.3335	20.011	16.6484	9.76681	4.17781
3	5	0.8	22.1025	21.351	18.9112	10.5231	5.69374
4	8	1.2	16.2555	14.717	15.0464	8.03457	4.36273
5	10	1.5	20.606	21.1399	18.7108	10.1687	4.09848
6	12	1.726	20.8944	19.5178	15.0251	8.31105	4.24381
8	17	2.291	21.6535	22.1141	20.9791	10.7566	5.33539
9	18	2.404	13.4151	12.8857	7.99386	3.4089	2.58621
11	22	2.856	17.8361	16.7178	11.925	4.75063	2.64575
12	25	3.195	17.2442	16.0717	14.0087	5.54161	3.99077
13	27	3.421	19.2999	21.2923	20.7008	11.7312	4.17173
14	30	3.76	14.4932	13.6219	13.0621	6.56306	2.92582
15	32	3.986	18.6429	16.8981	12.4377	7.09384	4.0128
16	34	4.212	21.3005	19.5899	14.551	8.12432	5.03571
18	39	4.777	20.4688	17.9253	14.5723	8.10097	5.27145
19	41	5	16.356	13.394	13.0189	7.74642	4.22183
21	45	5.727	19.9185	16.7218	14.497	9.05091	6.87511
22	48	6.279	16.2005	13.8576	13.8266	9.23321	5.59619
23	50	6.647	19.202	18.0255	18.3167	10.7931	4.50119
24	52	7.015	21.0707	17.2952	16.2039	9.16762	5.8648
25	55	7.567	17.9551	16.371	13.4353	7.37832	3.16618
26	57	7.935	21.3358	18.9156	18.4423	9.37803	5.43603
28	61	8.671	17.8325	16.2272	15.0968	9.69606	4.7426
29	64	9.223	20.9453	17.2	15.0485	9.64568	4.31152
31	68	9.959	17.8471	16.2049	13.5502	8.66452	5.70307
33	72	10.695	13.7957	10.4737	9.34347	7.04173	5.46961
34	75	11.247	8.71836	7.43843	6.96585	5.01692	4.2522
35	77	11.615	13.3775	11.5158	7.54152	5.88823	5.07309
36	79	12	10.7698	9.49495	6.60366	4.315	3.79653
38	84	13.931	13.213	11.99	10.5972	8.97472	6.81769
39	86	14.713	12.4476	12.2053	10.6116	5.8915	3.45753
41	90	16.277	14.8376	11.5808	10.7856	8.36079	5.72103
42	93	17.45	9.34992	9.33882	8.79834	5.06935	4.26935
43	95	18.232	16.178	14.3343	8.69439	8.18005	4.85527
44	97	19.014	24.238	21.6583	21.3169	13.133	8.89375
45	99	19.796	16.2962	14.5265	9.23049	6.43689	5.37286
46	102	21	14.538	14.6535	10.143	6.13907	3.56252
48	106	21.865	16.0208	16.3108	11.5855	7.62151	4.65246
49	108	22.309	19.1563	22.0725	17.9284	9.53539	5.06499
51	113	23.419	25.0216	28.9916	24.5279	10.5899	5.19338
52	115	23.863	25.5517	32.3816	24.8258	7.78501	3.84582
53	118	24.529	24.5416	32.1768	23.9035	8.08181	3.05682
54	120	24.973	27.575	30.3315	23.9648	8.5586	5.11595
55	122	25.417	24.0595	32.4889	23.8283	7.74169	2.7268
56	124	25.861
58	129	27	22.82	32.6061	26.5502	8.86585	4.48012
59	131	27.277
61	135	27.745	30.4568	34.0885	25.9492	7.3686	4.96668
62	137	27.979
63	139	28.213	23.3307	31.6407	25.8936	9.32572	3.26339
64	142	28.564	27.8554	27.6331	20.7833	9.23258	6.26128
65	144	28.798	20.1157	19.3725	12.7859	9.36917	7.3103
66	146	29.032	16.8431	15.0343	11.5721	8.58679	6.58514
68	151	29.617	16.4491	15.2948	13.8824	11.0528	7.86492
69	153	29.851	15.5437	13.0088	11.104	7.25516	4.79228
71	158	30.436	13.5519	10.9031	12.4994	8.12343	6.63375
73	162	30.904	12.3887	11.2601	10.5588	7.73714	6.37472
74	164	31.138	23.3021	18.4002	16.4448	11.6367	10.5956
75	167	31.489	16.3392	14.4076	10.6522	9.71303	7.76734
76	169	31.723	16.0118	13.3217	11.5332	7.88399	6.34877
81	182	33.244	16.6006	14.0043	14.8579	9.3473	7.50127
83	187	33.829	15.6659	13.4001	12.2507	7.4604	6.39288
84	189	34	17.1975	14.2748	14.0432	7.65342	6.22968
85	191	34.5	19.1123	18.4891	15.8159	9.37608	5.75115
86	194	35	17.7339	15.0048	12.6682	6.4576	5.3499
89	200	36.1	17.656	14.9457	13.7473	4.4183	3.44638
91	205	37	19.9468	18.2089	18.3427	8.75521	5.44579
92	207	37.4	21.4058	20.5743	17.2314	9.35682	6.0397
93	209	37.7	20.0535	17.1436	18.179	10.2695	7.75694
94	211	38	17.7671	17.1052	14.6701	8.53287	6.06791
95	214	38.6	18.5306	15.0586	13.4391	8.48768	6.35814
98	221	39.8	15.8798	13.6889	15.3718	11.061	6.74793
99	223	40.2	13.9408	13.2984	14.1431	8.00694	5.18174
101	227	40.9	17.0122	19.552	18.2024	11.0454	6.19183
102	229	41.3	17.1244	22.3276	20.608	10.5901	5.56732
103	232	41.8	16.3128	18.5389	17.922	11.4992	6.08396
104	234	42.1	19.2356	20.4886	17.8832	10.1528	5.67657
105	236	42.5	21.8991	24.8025	22.4679	13.0916	5.32289
106	239	42.9	23.1389	28.2043	22.5976	13.2913	4.86587
108	243	43.7	23.974	26.2306	23.0119	12.1119	6.02225
109	245	44	27.9824	25.5611	23.4705	12.628	6.18944
111	250	45	29.3506	29.3939	24.8681	12.7308	8.63606
112	252	45.3	27.1873	28.6806	25.188	12.1494	6.1863
113	254	45.6	26.8614	27.1024	24.2285	12.6307	7.11391
114	256	45.9	24.9032	24.7133	22.1229	12.1715	5.7683
115	258	46.3	25.3414	28.1803	25.2102	14.1854	5.9656
118	263	47	27.2276	29.2385	24.1208	10.1703	5.78344
119	265	47.5	28.455	29.0296	22.9862	11.5332	6.20622
121	270	48.5	22.7057	22.7207	21.4169	10.6402	7.86097
122	272	48.9	28.5847	28.979	21.8611	8.76243	5.98893
123	275	49.3	23.2211	25.2526	19.8109	11.5123	7.51019
125	279	50	21.5472	22.0125	17.3279	9.70956	6.92894
128	286	51.2	27.5807	27.0207	20.2631	14.1061	8.93878
129	288	51.6	25.8454	27.0003	22.0467	11.3511	7.56633
131	292	52.3	20.5958	20.6905	15.009	5.55403	2.90409
133	297	53	23.3145	24.9262	17.3926	8.84904	3.10513
135	302	54	21.4628	21.9659	14.4937	5.28278	3.27233
138	310	55.4	25.7956	26.7928	19.7724	5.37892	3.39913
139	312	55.8	24.7586	25.07	16.8932	4.69169	2.94353
141	316	56.5	23.5874	20.3671	15.852	6.88225	5.80392
142	319	56.9	22.1367	23.0212	21.8853	11.7701	7.4444
143	321	57.4	21.2886	23.8998	21.8042	9.78257	4.35352
144	323	57.7	28.75	27.0087	24.8383	13.5899	8.78055
145	325	58	21.9639	21.1096	18.537	13.5626	8.14004
146	328	58.3	26.6707	25.0243	24.7952	12.916	8.44799
148	332	59.3	21.4822	19.5468	19.6051	10.6677	7.19443
149	334	59.6	22.3722	22.0761	21.2007	9.65276	7.52661
151	339	60.5	18.126	18.3362	18.2351	9.3363	7.57403
152	341	60.8	22.591	22.4833	22.3511	11.3515	7.8961
153	343	61.2	21.2473	21.3872	20.5112	11.437	7.33328
154	346	61.8	24.6134	24.1822	24.3889	14.4032	8.00845
155	348	62.1	18.6439	19.0149	17.6014	10.1458	6.98585
156	350	62.4	21.5859	21.0154	23.3143	11.9446	6.64834
158	356	63.5	15.2516	12.8485	13.5408	8.11181	5.93178
159	359	64	20.7105	20.6183	20.6269	12.1494	8.26596
161	363	64.7	20.3471	18.0257	18.8603	11.7115	8.92079
162	365	65.1	22.4751	22.4431	22.2911	13.1209	8.93976
163	368	65.6	20.3803	21.1492	19.1983	12.017	6.59608
164	370	66	23.4344	22.0679	20.3618	14.184	9.51324
165	372	66.3	18.0792	19.6237	18.0779	9.50044	6.45162
166	374	66.9	17.8135	19.4358	20.4178	10.5971	7.05531
168	379	67.5	19.9722	20.259	21.4158	11.9074	7.33325
169	381	68	20.88	21.0009	20.2273	10.5252	7.74005
171	386	68.8	20.5663	18.3647	18.9444	12.0523	8.14547
172	388	69.1	22.9006	21.9487	20.5936	11.1936	8.09057
173	390	69.5	23.0272	21.8734	19.979	11.5113	6.8622
175	394	70.2	15.8512	17.242	14.725	7.62838	5.09481
178	401	71.4	16.4467	14.7459	13.8461	9.21314	5.92756
	406	72.3	18.6083	17.2728	16.6597	8.74798	6.86026
	410	73	22.7075	23.2949	20.8417	12.4463	8.27423
	412	73.4	17.3897	18.1862	18.0317	8.9422	6.24751
	414	73.7	23.5841	25.1076	22.9028	12.2733	6.95245
	416	74	22.9257	22.8691	21.7742	11.2894	7.06506
	420	74.8	28.235	29.3989	25.9242	12.2526	8.19782
	422	75.1	22.7251	22.7205	20.4589	11.7321	7.95168
	426	75.8	20.1559	20.9169	18.3193	11.0834	6.98299
	428	76.2	21.5116	19.946	17.6591	10.5473	7.28131
	440	78.3	23.2111	22.8557	20.1395	12.5454	7.99643
	442	78.6	22.2775	22.2958	20.7257	11.3742	6.57869
	444	79	24.9543	25.5436	21.2384	12.0641	7.8484
	446	79.3	22.5976	22.0007	19.0683	12.13	8.00322
	450	80	22.7631	22.4452	18.8665	12.0007	7.52256
179	456	81	28.0721	28.6544	21.9333	10.8063	7.22337
181	460	81.8	22.7668	22.4735	20.1426	12.0727	8.09635
183	464	82.5	26.484	25.0568	16.538	6.69115	2.69212
184	467	83	19.86	20.1922	18.1746	9.096	4.74334
185	469	83.4	24.797	24.4973	16.2305	8.97463	4.29443
186	471	83.7	19.2038	18.0892	15.6447	5.71291	2.07684
188	476	84.6	23.1884	20.9826	12.8818	6.28237	4.8971
189	478	85	17.7817	16.3184	7.50671	2.91925	1.46333
191	482	85.6	21.3783	21.7466	15.4163	7.27537	4.0033
192	485	86	20.6343	20.1723	13.9034	6.45013	4.49367
193	487	86.5	20.7068	18.3588	12.2801	4.77913	4.77913
194	489	86.8	25.8572	23.336	20.1881	9.39436	8.43062
195	491	87.2	17.457	17.828	9.15152	3.89139	2.92578
196	493	87.6	31.4732	25.4021	19.2395	9.97238	7.39934
199	501	89	16.4494	16.834	12.7341	8.7857	6.22771
201	505	89.7	21.3372	21.306	17.0161	6.51952	5.68401
202	508	90.1	26.5977	24.5237	18.5773	8.58196	7.03441
203	510	90.6	23.7328	24.6687	17.7926	6.23199	5.7005
205	514	91.3	25.6572	28.6834	22.1839	9.65159	8.06288
206	516	91.6	20.4068	22.5235	18.559	6.06932	4.14446
208	520	92.3	25.8644	25.551	20.1185	7.905	4.82471
209	523	92.8	25.1501	27.3643	20.4975	9.63729	5.90557
211	527	93.5	28.8533	31.806	22.1667	5.1772	3.38025
212	529	93.8	27.929	29.407	22.0089	9.65469	6.1123
213	531	94.2	25.7987	28.581	21.7587	6.35271	5.25506
215	536	95.1	22.4613	23.4808	16.1844	5.37708	3.45842
216	538	95.5	22.2021	23.5846	17.7977	4.9902	4.37298
218	543	96.4	29.6836	29.2585	22.2468	9.53701	6.64708
221	550	97.6	25.3744	25.8234	21.7004	9.4244	6.94435
223	554	98.3	19.6289	26.7206	18.9837	3.66994	3.04208
224	557	98.8	18.9736	25.8459	21.0572	3.91263	3.09133
225	559	99.2	21.1515	27.5722	23.3689	5.94534	4.97176
226	561	99.6	27.7241	27.544	21.9262	8.99587	8.5535
228	565	100.2	31.7118	30.4592	17.776	9.06459	5.55512
231	572	101.5	29.8268	30.8345	21.0125	7.59256	4.80417
233	577	102.3	30.9318	30.3389	21.2616	5.28092	3.27892
234	579	102.7	29.5808	29.9232	18.7449	4.95619	3.76731
235	581	103	30.215	33.3806	15.467	5.77745	3.63916
236	583	103.3	30.7727	31.7424	13.3024	2.78161	2.22172
238	588	104.3	30.5294	30.3321	12.3396	2.10201	1.62582
239	590	104.6	34.2112	36.0772	23.5724	4.99446	3.25667
241	595	105.5	30.1962	31.9306	18.2175	5.88324	2.76757
243	600	106.4	29.8667	32.0054	20.64	6.84394	4.5631
244	602	106.7	23.936	22.9104	16.0245	6.58448	5.04051
245	604	107	22.4367	24.0968	17.2565	6.20322	4.67379
248	610	108.1	26.214	25.9865	20.733	6.00716	4.57176
249	613	108.6	26.7611	25.9524	21.2025	5.86044	4.96511
251	617	109.3	25.3296	25.2886	19.233	5.35135	5.35135
253	622	110.2	30.6196	29.6703	23.4585	11.2	9.48133
255	626	110.9	28.0342	26.435	21.4281	8.47922	7.06823
256	628	111.3	30.8888	29.7538	26.1622	10.9319	7.68481
258	633	112.2	27.7285	26.8137	21.704	7.5181	5.84367
259	635	112.5	26.6637	25.9317	22.7045	6.80647	4.24721
261	640	113.4	20.6398	21.7939	17.7954	7.41123	5.63201
265	649	115	25.9207	25.2444	23.7141	9.37281	7.00898
266	651	115.3	31.6412	26.0065	25.5888	11.2919	8.16391
268	655	116	20.9272	20.8961	17.0193	4.72169	2.8744
269	657	116.4	19.6914	20.0623	16.0274	4.63033	4.63033
271	662	117.3	21.8798	22.4461	18.6005	5.84454	5.84454
273	666	118	27.3169	28.5943	19.239	5.65224	4.80037
274	669	118.4	28.399	30.6352	24.6441	9.96423	7.59066
275	671	118.8	28.6495	27.3468	24.3424	10.0824	7.38359
276	673	119.2	30.3293	28.0825	25.5004	8.46854	6.88183
278	678	120	27.3903	27.0625	22.3764	5.93737	4.01332
279	680	120.5	17.2744	19.9683	18.5984	5.77307	1.72446
281	684	121.1	16.404	15.2717	13.6705	4.99811	4.99811
283	689	122	29.3105	28.5487	25.3313	9.16469	5.9887
284	691	122.3	30.6072	29.9529	28.6508	10.8371	6.71624
285	693	122.7	30.5508	29.8162	26.7226	9.38044	8.18235
286	695	123	34.0268	31.7082	26.5993	10.5066	6.47757
288	700	124	30.3937	27.8901	20.7473	9.15008	7.00513
289	702	124.3	21.4635	19.539	13.6584	8.29345	7.18234
291	707	125.1	30.4883	31.798	21.1789	7.57728	3.75498
293	711	125.8	32.214	32.6927	20.7934	6.90639	4.48911
	718	127	23.1911	23.7471	11.5809	3.24063	2.29147
	720	127.5	21.2511	18.9737	8.36497	5.06216	3.85656
	726	128.5	32.3658	31.3129	19.1375	6.65582	4.3936
	728	129	29.5488	27.6745	18.9661	7.68277	6.80571
	732	129.5	29.7462	31.4416	17.5032	8.58193	6.46574
	736	130.2	22.0026	20.6047	9.14919	4.40545	2.79568
	740	130.9	28.4372	29.8396	16.8195	6.62559	2.16165
	742	131.3	25.208	27.0643	17.4046	3.79634	1.23801
	746	132	23.6949	26.3996	14.1915	5.80692	1.90543
	752	133	26.3497	28.3977	15.9424	7.96114	4.0864
	758	134	14.0465	14.3627	9.26734	3.20245	0.610847
	760	134.5	16.7222	18.4301	11.9374	6.03537	3.35123

## Sheet: CUX
Depth	DATE	Age (linear interpol)	Age (linear interpol) ka (assumed BP)	tropical forest	warm-temperate forest	temperate forest	grassland and dry shrubland	desert		VERY CRUDE age model based on linear interpolations only
20	0	0	0	4.23103	13.6514	13.8866	7.72118	4.23103		However, if Eemian is warm-temperate forest instead of temperate forest, then close?
22		60	0.06	4.24053	16.8421	17.4354	8.08577	5.02252
30		300	0.3	3.95189	15.0684	15.0684	8.04682	4.18095
45		750	0.75	3.3603	10.9798	10.9798	3.97693	2.74367
53		990	0.99	1.54238	12.5451	13.8229	6.01452	3.45901
60		1200	1.2	2.88675	12.6717	12.9108	4.70325	2.88675
67		1410	1.41	3.51691	15.0808	14.4313	5.10802	3.15931
75	1650	1650	1.65	0.65938	12.2002	12.2002	1.31876	0
83		2042.91	2.04291	3.10568	14.2661	13.7165	3.90239	3.90239
90		2386.69	2.38669	2.23535	12.9501	12.9501	2.23535	2.23535
96		2681.36	2.68136	1.77841	14.712	13.5845	0.650945	0.650945
105		3123.35	3.12335	5.56158	15.5862	14.0714	3.41931	3.41931
114		3565.35	3.56535	3.87976	15.7439	13.5989	2.36985	1.09985
120		3860.02	3.86002	4.27614	13.8975	12.288	2.94281	2
127		4203.8	4.2038	3.26164	14.0432	12.7385	2.60931	2.60931
135		4596.68	4.59668	1.98246	13.2633	13.2633	2.64327	1.98246
144		5038.68	5.03868	1.49151	12.6996	13.9352	3.34491	1.49151
150		5333.35	5.33335	1.45583	13.4418	14.0448	2.05885	0.852803
156		5628.02	5.62802	1.20824	15.1601	14.556	0	0
165	6070	6070.01	6.07001	1.38011	12.8099	12.2382	1.95178	1.38011
180		6271.52	6.27152	0.910975	13.5341	13.5341	0.910975	0.910975
195		6472.95	6.47295	0	12.5813	12.5813	0.633724	0
210		6674.39	6.67439	0.613139	11.7466	11.7466	1.67513	0.613139
225		6875.83	6.87583	1.78647	12.7148	11.5239	1.62691	0.595491
235	7010	7010.11	7.01011	2.64135	12.0371	12.0371	3.19867	1.7609
240		7686.4	7.6864	4.0205	12.2375	12.2375	4.34279	2.51427
245		8363.2	8.3632	3.94493	10.5691	10.0834	5.51969	3.45929
250		9040	9.04	5.77173	10.7856	10.7856	7.70004	4.46429
255		9716.8	9.7168	5.90198	13.5951	13.1077	7.21321	4.92724
260		10393.6	10.3936	6.57906	12.2426	12.2426	8.36727	5.25226
264		10935	10.935	4.01332	12.2266	12.2266	4.37114	3.14945
274		12288.6	12.2886	2.28827	14.8001	14.8001	3.96339	2.28827
283		13506.9	13.5069	4.73785	14.2229	14.2229	6.24971	3.6688
286		13913	13.913	3.07225	12.9998	12.7363	3.44498	2.8087
292		14725.1	14.7251	2.39745	13.6361	13.8352	4.47516	1.51184
296		15266.6	15.2666	4.92366	13.8431	13.2277	4.3082	3.69274
300		15808	15.808	1.74902	10.6749	10.0348	2.65437	1.74902
310		17161.6	17.1616	2.18573	11.6801	10.7747	2.07168	0.640184
315		17838.4	17.8384	3.89405	12.1695	11.5457	4.77621	1.76432
320		18515.2	18.5152	3.61085	11.6664	12.9547	6.18748	3.61085
323		18921.3	18.9213	3.8265	11.8514	11.2288	5.35148	3.20392
327		19462.7	19.4627	7.99244	13.5197	15.0104	12.9086	7.77413
333		20274.9	20.2749	6.23676	9.18747	10.3287	9.66058	5.60848
337		20816.3	20.8163	7.48984	10.4293	10.1176	8.10073	5.71251
342		21493.1	21.4931	5.08785	11.6708	11.6708	9.21193	4.5297
345	21900	21899.2	21.8992	7.52311	15.4071	15.6112	10.9308	6.42148
352		22846.7	22.8467	5.91719	11.6259	10.8278	7.10216	3.19235
360		23929.6	23.9296	4.43678	13.0989	12.8203	7.01091	2.51045
368		25012.5	25.0125	5.29155	12.409	13.3377	11.4994	1.69692
374		25824.6	25.8246	4.16667	12.2162	13.0496	8.41585	1.66667
385		27313.6	27.3136	5.27681	13.8	16.7358	10.4653	3.09108
400		29344	29.344	6.40278	13.2098	15.9054	12.7088	3.51057
410		30697.6	30.6976	6.64192	13.9086	17.4102	10.5136	1.41841
419		31915.8	31.9158	4.36932	12.6508	15.2257	8.86526	2.77401
429		33269.4	33.2694	7.61692	15.6712	18.014	10.283	2.87678
438		34487.7	34.4877	4.73329	15.5006	18.2115	8.02703	1.61833
448		35841.3	35.8413	7.08818	18.0071	19.1282	8.73272	1.83942

## Sheet: LJunin
Sample	Sample age (LAPD 1)	Sample age (LAPD 1) ka, assumed BP	tropical forest	warm-temperate forest	temperate forest	grassland and dry shrubland	desert
160	0	0	8.93949	15.4187	14.3047	8.25091	6.58096
190	0	0	11.5685	19.1816	22.5177	13.6838	8.03796
250	0	0	10.0676	19.3785	23.84	12.3897	8.42558
350	0	0	9.88	21.2446	20.9064	8.8518	8.0937
388	0	0	7.08752	12.7877	16.7841	9.27325	5.65182
410	0	0	9.04126	15.0894	13.3547	5.50327	3.05306
430	3344	3.344	14.7612	19.1024	15.7512	10.9197	8.2778
465	3712	3.712	13.6667	19.5611	14.9065	10.4709	5.33075
480	3870	3.87	13.0664	21.0678	15.1357	7.63151	6.44681
510	4185	4.185
550	4606	4.606	15.877	22.6559	20.7336	10.2788	8.11834
580	4922	4.922
610	5237	5.237	19.4857	25.9927	21.1674	13.2151	10.0355
650	5658	5.658
685	6026	6.026
690	6079	6.079	16.1888	25.4745	19.9079	11.2466	8.23296
710	6289	6.289
750	6710	6.71	18.2513	26.1858	17.5125	8.67544	6.53524
784	7067	7.067
810	7341	7.341	17.3398	25.2163	18.3053	8.48881	5.94218
850	7761	7.761
880	8077	8.077	16.0045	26.1878	21.3608	10.0906	6.94461
910	8392	8.392
930	8603	8.603	18.2923	25.8884	18.8666	10.0525	7.67506
950	8813	8.813
970	9023	9.023	16.8061	23.8065	19.2204	9.95273	7.48873
985	9181	9.181
1020	9549	9.549	12.2117	19.4324	16.7557	7.76881	7.76881
1044	9802	9.802	13.5492	20.628	15.9174	7.3726	5.14066
1070	10075	10.075	4.5663	10.2233	11.528	6.14116	4.8365
1085	10233	10.233	9.88216	20.1685	14.2373	4.21723	2.66532
1105	10443	10.443	8.91361	20.2687	18.0596	6.66712	4.21938
1125	10654	10.654	5.28874	14.2528	14.648	5.93986	2.40233
1145	10864	10.864	6.35002	15.4584	15.8349	5.18114	3.62923
1160	11067	11.067	10.2655	19.051	16.9891	7.85711	4.11516
1180	11533	11.533	10.3292	19.1817	22.6228	12.5714	6.88086
1200	12000	12	12.2325	20.8033	26.0584	16.6318	10.2496
1220	12585	12.585	11.5555	15.405	20.1868	13.5351	6.85219
1260	13756	13.756	9.06915	13.0923	18.2201	11.0398	4.66263
1310	15219	15.219	12.053	12.4525	21.7542	12.7206	6.83763
1435	16895	16.895	12.1889	12.8699	18.4828	13.8329	8.90091
1460	17003	17.003	9.66965	16.8361	21.1604	14.6382	7.22691
1520	17263	17.263
1540	17350	17.35	12.0869	14.0815	16.4479	12.6222	7.59231
1560	17436	17.436
1656	17852	17.852	12.2334	11.826	17.8705	12.2334	8.56062
1690	18000	18
1725	18435	18.435	11.7787	15.0517	23.7367	17.5274	11.6301
1800	19521	19.521
1824	19869	19.869	6.16535	7.16265	10.4216	7.86786	6.664
1925	21331	21.331	10.9947	9.49112	15.682	15.8837	9.955
1976	22069	22.069	4.77222	10.8498	12.9764	9.44783	6.80225
2118	24995	24.995	11.2832	15.0124	23.7912	18.0798	12.1999
2190	32302	32.302	4.73794	3.51385	6.77562	7.53811	5.56202
2210	34332	34.332	3.35393	6.24385	8.98232	5.09471	3.58715
2230	36361	36.361	3.95991	6.63543	8.69034	6.76294	5.22991

## Sheet: Patzcuar
Sample	Sample age (NAPD 1)	Sample age (NAPD 1) ka, assumed BP	tropical forest	warm-temperate forest	temperate forest	grassland and dry shrubland	desert
623			3.22985	10.6114	12.6481	3.66655	3.66655
626			2.75045	12.1936	14.0223	2.59471	2.59471
631			4.23787	12.7396	14.8544	5.37563	5.37563
639			5.00614	11.8912	13.4951	5.24102	4.43909
647			3.82499	14.0821	13.8709	4.15144	3.59416
655			2.9042	14.2666	13.8534	2.8555	2.8555
665			2.06699	12.8107	12.6623	2.981	2.19774
675			2.52757	12.1938	12.4309	1.95497	1.95497
685			3.17863	13.551	14.6595	2.63789	2.63789
705			2.83114	12.2713	13.5213	3.97706	3.97706
715			1.94543	11.55	11.3689	2.20155	2.20155
725			3.37067	13.8528	12.6962	2.55281	2.55281
735			2.64118	12.1565	12.8585	3.34322	3.34322
745			1.61985	12.8826	12.4873	3.1002	3.1002
755			1.45319	11.4783	12.0803	2.5054	2.5054
765			2.79508	12.8212	12.2622	2.97208	2.97208
775			2.56039	12.0598	13.231	3.27167	3.27167
805			0	11.7785	10.4766	0.823387	0.823387
815			0.644157	11.1329	11.1329	1.28831	1.28831
825	2935	2.935	1.52965	11.9222	11.8682	2.32146	2.32146
835	3065	3.065	2.52757	13.7048	14.2774	4.97612	4.40352
845	3194	3.194	2.6536	13.7111	14.9147	3.53765	2.7446
855	3323	3.323	2.32991	11.8151	12.6758	3.21204	3.21204
865	3452	3.452	1.3581	11.9636	10.9893	2.48319	1.92065
875	3582	3.582	3.14114	14.695	14.0177	3.07182	3.07182
885	3827	3.827	1.11979	13.2428	12.1231	2.04123	2.04123
905	4506	4.506	0.560772	13.0009	11.6273	0.793052	0.793052
925	5185	5.185	0.565233	12.3538	12.588	0.565233	0.565233
945	5865	5.865	2.12653	14.143	14.2957	1.70941	1.13961
965	6544	6.544	0	14.0253	13.1067	0.819232	0.819232
985	7223	7.223	1.36026	14.4136	14.2832	0.563436	0.563436
1005	7902	7.902	1.87098	14.0259	14.4763	1.64399	1.64399
1025	8582	8.582	2.75353	16.3665	15.9803	0.566139	0.566139
1065	9810	9.81	2.77845	14.9444	13.7935	1.38922	1.38922
1105	10928	10.928	2.80796	15.3822	14.5221	2.37356	2.37356
1145	12045	12.045	3.30981	18.4957	14.8191	1.066	1.066
1185	13162	13.162	3.7088	16.8266	15.2278	2.18402	2.18402
1225	14279	14.279	2.56571	17.333	14.8386	2.22523	1.40323
1265	15396	15.396	2.65937	16.562	13.7167	1.99772	1.99772
1305	16513	16.513	3.37435	17.0246	14.2725	1.40522	1.40522
1345	17630	17.63	3.05542	17.2598	12.9949	1.12867	1.12867
1385	19152	19.152	3.24501	17.5384	15.3591	2.79507	2.25194
1425	20701	20.701	2.53173	18.069	15.0294	1.72062	1.72062
1445	21476	21.476	2.10819	17.1388	14.9156	1.66267	1.66267
1485	23025	23.025	1.58797	16.7591	11.7899	1.16248	1.16248
1505	23799	23.799	2.99801	17.3856	15.6535	2.23552	2.23552
1545	25348	25.348	2.0626	16.332	13.3005	1.45848	1.45848
1585	26138	26.138	3.04838	16.7622	14.1459	1.43006	1.43006
1625	26781	26.781	2.03904	15.8579	11.9945	1.09272	1.09272
1660	27343	27.343	2.28665	16.6858	14.1339	1.95178	1.38011
1685	27745	27.745	2.56464	16.2541	15.1745	1.15278	1.15278
1705	28066	28.066	2.28753	14.8311	13.6761	1.59364	1.59364
1745	28709	28.709	2.3664	15.6096	13.5066	2.185	2.185
1785	29351	29.351	1.9712	16.2812	13.4555	1.39385	1.39385
1825	29994	29.994	2.38591	15.4993	14.3151	2.20301	2.20301
1865	30956	30.956	2.28292	16.5746	13.9988	1.71219	1.14146
1905	33102	33.102	4.6107	18.6196	15.3054	3.45754	2.895
1945	35248	35.248	3.31384	17.7811	15.8234	2.15666	2.15666
1965	36321	36.321	4.88879	18.5195	15.8648	3.2969	2.63752
1995	37930	37.93	4.9672	18.2168	14.7973	1.49738	1.49738
2025	39540	39.54	4.82558	16.26	15.2075	2.65841	2.65841
2065	41686	41.686	2.78306	15.4168	12.6605	1.39153	1.39153
2085	42759	42.759	4.69788	17.314	14.5857	1.82574	1.82574
2110	44100	44.1	3.51307	14.2142	12.3158	2.69384	2.69384

## Sheet: QUEX
Sample	Sample age (Leyden 1995)	Sample age (Leyden 1995) ka, assumed BP	tropical forest	warm-temperate forest	temperate forest	grassland and dry shrubland	desert
760	8746.37	8.74637	24.6848	30.5667	17.0441	2.09169	2.09169
770	8861.45	8.86145	23.2416	29.6514	17.9718	1.62835	1.62835
780	8976.54	8.97654	25.8384	29.4289	16.3089	2.95053	2.95053
790	9091.62	9.09162	23.5896	28.2382	15.6652	2.03331	2.03331
820	9436.87	9.43687
830	9551.96	9.55196	21.8075	26.999	12.9175	0	0
840	9667.04	9.66704
860	9897.21	9.89721	21.1451	31.3148	17.6827	0.545545	0.545545
870	10012.3	10.0123
880	10127.4	10.1274
883	10161.9	10.1619	18.4581	29.9132	18.8608	3.04652	3.04652
890	10242.5	10.2425	9.7709	15.2528	10.4563	3.03813	3.03813
905	10544.7	10.5447	5.17321	4.76075	4.76075	12.1121	12.1121
910	10667	10.667	5.82676	4.23151	6.83774	10.358	10.358
920	10911.6	10.9116	4.17582	3.42438	5.31728	10.5148	10.5148
930	11156.3	11.1563	4.61227	4.68471	5.52535	10.8446	10.8446
940	11400.9	11.4009	5.03945	5.03945	6.24903	10.2359	10.2359
970	12134.9	12.1349	6.43924	11.1417	12.0103	7.4391	7.4391
990	12624.2	12.6242	6.33558	9.82056	9.58045	8.70315	8.70315
1020	13358.1	13.3581	5.86671	11.0601	12.6131	8.28645	7.4017
1040	13847.4	13.8474	8.76395	9.28853	12.55	10.114	9.66035
1060	14336.7	14.3367	7.122	9.86824	10.5535	6.78572	6.78572
1080	14826	14.826	6.02773	7.54562	6.91697	7.13457	7.13457
1120	15804.6	15.8046	7.49117	8.38372	8.20575	8.72701	8.72701
1140	16293.9	16.2939	4.05575	11.7257	7.78401	5.23477	5.23477
1180	17272.5	17.2725	8.08027	7.43532	8.40063	8.44994	8.44994
1210	18006.5	18.0065	5.04183	11.7801	8.66658	6.02425	5.47293
1230	18495.8	18.4958	6.91498	10.7269	10.9306	7.23696	7.23696
1270	19474.4	19.4744	5.65852	10.9985	11.9431	4.89155	4.89155
1290	19963.7	19.9637	7.6165	13.0484	11.9203	6.93855	6.3277
1320	20697.6	20.6976	5.14932	12.6488	11.8091	6.49675	5.06817
1340	21186.9	21.1869	4.67772	5.15851	8.50322	9.32896	7.64381
1360	21676.2	21.6762	4.92812	9.00331	9.90183	7.0429	6.29754
1380	22165.5	22.1655	4.00888	11.7749	12.4323	4.46177	3.94329
1410	22899.5	22.8995	5.90801	10.0064	11.0743	8.52362	7.51655
1430	23388.8	23.3888	5.93896	9.9979	11.5594	11.3653	9.76576
1450	23878.1	23.8781	7.57927	10.8053	12.8264	9.59046	8.39645
1470	24367.4	24.3674	4.85703	12.3494	16.5929	6.78943	4.22869
1490	24856.7	24.8567	5.73161	13.2393	17.1925	5.85092	3.52597
1500	25101.4	25.1014	6.08992	18.8398	19.2257	4.05171	1.90636
1515	25468.3	25.4683	5.56728	11.4716	15.4402	6.83325	4.63608
1530	25835.3	25.8353
1540	26080	26.08	3.6975	15.1981	16.2842	4.00862	1.8221
1550	26324.6	26.3246
1560	26569.3	26.5693	3.099	14.9684	17.5558	4.36676	2.49222
1580	27058.6	27.0586	5.86988	13.5238	17.6546	8.42231	4.29151
1590	27303.2	27.3032	7.48259	7.57283	10.7737	12.3718	11.6737
1600	27547.9	27.5479	7.58124	10.7667	12.7267	12.1797	10.7804
1610	27792.5	27.7925	5.43298	15.8219	19.8032	6.57154	3.12044
1620	28037.2	28.0372	7.82211	13.7312	15.9305	5.65192	3.41098
1640	28526.5	28.5265	5.41458	13.2582	15.0715	6.32722	5.43279
1650	28771.1	28.7711
1690	29749.7	29.7497	7.76294	12.9107	17.8359	8.94597	6.63964
1700	29994.4	29.9944
1720	30483.7	30.4837	6.73292	10.6218	13.8574	10.1754	8.33891
1730	30728.3	30.7283	7.98419	14.0807	16.1646	9.85395	8.30475
1750	31217.6	31.2176	9.39915	17.124	15.501	7.42315	6.09668
1780	31951.6	31.9516	6.08602	15.0675	16.3308	6.80938	5.28626
1800	32440.9	32.4409	6.44488	12.978	16.6112	9.24232	7.20926
1825	33052.5	33.0525	7.4088	14.4169	17.5456	8.1337	6.1423
1835	33297.1	33.2971	8.14484	19.9167	18.6612	3.70127	1.86235
1855	33786.4	33.7864	7.02903	14.2438	16.6546	8.64644	6.765
1880	34398.1	34.3981	6.98732	13.8084	14.8073	3.63913	1.76923
1900	34887.4	34.8874	11.2575	14.1297	16.5732	9.08524	7.67599
1905	35009.7	35.0097	8.05655	11.091	14.5962	4.60376	3.07645
1920	35376.7	35.3767	7.59333	10.6742	12.4755	9.9681	8.59449
1940	35866	35.866	9.16054	12.5386	15.0541	7.71508	5.88933
1957	36281.9	36.2819	9.51626	13.1219	14.8698	9.44252	8.23083

## Sheet: Sali3
Sample	Sample age (LAPD 1)	Sample age (LAPD 1) ka, assumed BP	tropical forest	warm-temperate forest	temperate forest	grassland and dry shrubland	desert
14	2380	2.38	16.4729	16.6534	10.9946	7.65636	4.16638
16	2720	2.72	12.7044	12.0266	8.75532	7.12762	4.98612
22	3540	3.54	14.5196	14.466	10.2603	7.43579	4.1521
25	3900	3.9	19.2522	18.7718	11.6947	5.97455	3.88597
28	4093	4.093	15.1287	14.8415	9.22422	5.91031	3.89484
31	4286	4.286	13.7502	14.2187	10.5789	7.19091	4.1675
34	4592	4.592	11.0132	11.5465	9.44806	7.56352	3.38161
37	4955	4.955	7.02382	6.41538	6.52101	4.79623	2.3116
40	5318	5.318	10.9882	10.2786	8.51145	8.18162	4.75409
43	5679	5.679	18.2211	18.2374	10.6673	8.1631	4.28598
46	6035	6.035	18.5693	16.8768	9.73152	8.10432	4.34631
49	6391	6.391	19.2329	16.3807	10.1172	7.79698	3.77215
51	6806	6.806	18.1669	19.4919	11.6491	9.27087	3.49488
52	7102	7.102	18.0222	17.0188	9.0493	5.84139	3.55375
55	7990	7.99	18.4763	18.7038	9.27229	7.50434	4.10937
58	8686	8.686	18.6794	18.4402	12.2033	9.65352	5.25535
61	9220	9.22	15.4504	15.2756	10.0114	7.43191	3.53698
64	9430	9.43	19.2089	17.7927	10.6499	8.58054	4.63187
67	9640	9.64	20.0075	19.7097	12.9113	9.05134	3.46057
70	9850	9.85	15.1499	16.3999	10.0457	8.98047	4.46209
73	10060	10.06	13.1498	16.26	11.7334	11.1472	4.65049
76	10270	10.27	10.7759	14.687	12.6653	11.6678	5.13457
79	10468	10.468	14.3702	14.5766	11.087	12.0192	5.3003
82	10641	10.641	11.4308	14.2875	12.0851	11.5036	4.38689
86	10871	10.871	12.4352	14.5267	11.786	13.4743	5.69863
97	11506	11.506	21.0909	17.3576	15.8396	13.0116	7.39946
103	11852	11.852	18.6579	15.6361	16.0828	14.2466	7.74873
109	12198	12.198	19.0274	16.8401	14.0895	11.1159	5.66696
115	12544	12.544	20.1652	19.3781	12.9562	8.41735	2.70003
121	12890	12.89	16.8382	15.9166	11.901	12.1622	6.20769
127	13464	13.464	13.0258	15.9428	13.7479	12.3099	3.96002
133	14039	14.039	18.3014	18.3846	14.4946	11.1637	4.49128
139	14697	14.697	17.8477	16.0658	13.0603	10.2434	5.41442
145	15398	15.398	22.1102	19.5491	15.0959	11.125	5.24062
151	16099	16.099	17.3242	13.7064	12.9282	10.5002	5.97439
154	16450	16.45	18.1716	17.1945	13.5943	9.88095	5.94154
157	16800	16.8	22.1539	18.0969	13.4888	10.8236	6.43958
160	19555	19.555	20.7963	18.1917	13.4148	9.63858	5.43187
163	22311	22.311	23.3563	20.3171	14.5372	8.705	4.13688
166	25066	25.066	23.8221	19.0925	13.6137	10.9134	6.47335
174	29127	29.127	23.2707	18.802	16.426	11.1311	7.19216
180	29708	29.708	24.8637	20.3711	11.8018	9.6887	6.29845
186	30288	30.288	19.692	18.3962	14.0816	7.33309	3.63439
192	30869	30.869	25.1301	20.9527	13.5284	11.2826	7.47102
198	31449	31.449	21.204	17.8401	13.0502	8.82235	5.23997
204	32030	32.03	21.4871	18.3507	13.6804	7.82824	5.14435
210	32611	32.611	19.6275	15.9471	9.77231	8.93015	5.81647
222	33772	33.772	17.8792	14.3849	5.66867	4.79217	4.06669
234	34933	34.933	12.7959	11.5013	4.66597	5.24682	4.49938
240	35514	35.514	25.4396	22.4836	8.59106	4.00336	3.26279
252	36675	36.675
258	37255	37.255	17.0084	13.86	4.93831	3.98448	3.98448
264	37836	37.836	17.5503	15.9478	4.63571	4.68705	4.32807
270	38416	38.416	21.0701	15.2918	4.94827	5.56317	5.56317
276	38997	38.997	17.7913	13.0658	4.54843	4.37001	4.37001
282	39578	39.578	16.595	12.5327	4.67557	4.33879	4.33879
288	40158	40.158	16.4963	11.8777	5.67756	5.0303	4.67631
294	40739	40.739	16.5151	11.759	4.7275	4.50507	4.50507
331	44319	44.319	21.4162	14.4973	5.9626	4.75893	4.75893
337	44900	44.9	19.0847	11.7671	6.30022	7.23452	7.23452
343	45480	45.48	15.7747	9.68188	5.56284	7.24327	7.24327
355	46641	46.641	10.1045	5.72506	3.13497	4.95295	4.68813
361	47222	47.222	12.1246	5.66737	5.27308	7.56836	6.96824
367	47803	47.803	11.5501	5.26266	3.02883	5.96515	5.96515
373	48383	48.383	13.5498	8.23063	5.49604	6.90647	6.54932
379	48964	48.964	12.0342	5.7732	3.06143	5.75082	5.30248
385	49544	49.544	9.11183	3.24693	2.95437	7.79706	6.77377
401	51093	51.093	16.8145	10.548	7.04757	6.1966	5.83121
431	53996	53.996	20.8667	14.2067	9.94247	8.80897	6.89869
447	55544	55.544	16.9857	12.0074	9.89587	10.8709	8.56032
466	57382	57.382	17.3635	12.5462	10.5427	8.30831	4.4278
478	58544	58.544	19.5386	14.6085	12.2037	7.85664	5.73824
496	60285	60.285	13.8053	11.7357	8.30201	5.15502	4.79856
514	62027	62.027	14.4244	10.7892	9.15995	4.39374	3.85613
526	63188	63.188	12.798	8.25476	6.75893	4.80233	4.56107
538	64349	64.349	3.73905	1.44526	3.37774	2.65511	2.65511
544	64930	64.93	3.55266	0	3.55266	3.55266	3.55266
550	65511	65.511	4.11232	1.5334	4.11232	3.42307	3.42307

## Sheet: Tititaka
Depth	Fritz et al Age Model	Fritz et al Age Model, ka, assumed BP	tropical forest	warm-temperate forest	temperate forest	grassland and dry shrubland	desert
0.1	3136.5	3.1365	23.3332	13.8172	27.028	24.4528	25.0912
0.44	4573	4.573	23.4202	12.8339	28.3127	23.3978	20.4491
0.84	6263	6.263	18.9368	11.4514	23.5643	19.5113	18.0038
1.24	7953	7.953	21.1101	11.8309	26.4166	20.5855	18.137
1.44	8798	8.798	25.3789	13.2484	26.0477	23.0864	22.9211
1.74	10065.5	10.0655	21.5683	8.99892	21.7442	19.3268	18.0137
2.14	11755.5	11.7555	11.0311	8.99496	13.7186	11.3247	9.59268
2.54	13445.5	13.4455	13.0553	9.48423	16.1034	13.3774	10.2728
2.62	13783.5	13.7835	26.3801	16.9482	30.508	25.4829	22.6434
3.39	17036.8	17.0368	19.4296	15.0565	23.498	19.8122	17.4466	<200 pollen
3.44	17248	17.248						Low pollen numbers
3.54	17670.5	17.6705						Low pollen numbers
3.64	18093	18.093						Low pollen numbers
3.74	18515.5	18.5155						Low pollen numbers
4.04	19783	19.783						Low pollen numbers
4.24	20628	20.628						Low pollen numbers
4.34	21050.5	21.0505	22.6719	15.9292	26.3951	18.0295	17.3962	<200 pollen
4.44	21284.7	21.2847	27.3912	18.858	31.3207	24.3291	21.0596
4.54	21346	21.346						Low pollen numbers
4.64	21407.3	21.4073						Low pollen numbers
4.74	21468.6	21.4686						Low pollen numbers
4.94	21591.2	21.5912						Low pollen numbers
5.34	21836.4	21.8364						Low pollen numbers
5.74	22081.6	22.0816						Low pollen numbers
6.24	22388.1	22.3881						Low pollen numbers
6.44	22510.7	22.5107						Low pollen numbers
6.84	22755.9	22.7559						Low pollen numbers
7.24	23001.1	23.0011						Low pollen numbers
7.63	23240.2	23.2402						Low pollen numbers
7.94	23430.2	23.4302						Low pollen numbers
8.14	23552.8	23.5528						Low pollen numbers
8.54	23798	23.798						Low pollen numbers
8.74	23920.6	23.9206						Low pollen numbers
9.24	24227.1	24.2271						Low pollen numbers
9.44	24349.7	24.3497						Low pollen numbers
9.84	24594.9	24.5949						Low pollen numbers
10.04	24717.5	24.7175						Low pollen numbers
14.94	27721.2	27.7212	22.2017	16.3922	24.541	18.9593	18.2741
16.43	29222.2	29.2222						Low pollen numbers
17.94	31354.3	31.3543	29.7583	17.9708	33.5984	26.699	26.5226	<200 pollen
19.44	33472.3	33.4723	31.4893	17.1253	35.3801	29.9928	26.6914	<200 pollen
25.44	41944.3	41.9443	20.2383	11.2303	25.0333	21.1022	17.6467	<200 pollen
26.94	44062.3	44.0623	20.8758	16.9086	27.3565	17.8374	17.4007	<200 pollen
28.49	46250.9	46.2509						Low pollen numbers
29.99	48368.9	48.3689	28.2209	18.6335	31.1436	23.4044	20.979	<200 pollen
31.06	49879.7	49.8797						Low pollen numbers
31.44	50416.3	50.4163	30.2786	15.4506	33.1743	29.0162	27.1851	<200 pollen
31.57	50599.8	50.5998						Low pollen numbers
31.8	50924.6	50.9246						Low pollen numbers
32.24	51545.9	51.5459						Low pollen numbers
32.64	52110.7	52.1107						Low pollen numbers
32.94	52534.3	52.5343	31.2293	15.447	34.7722	28.426	26.8416	<200 pollen
33.04	52675.5	52.6755						Low pollen numbers
33.29	53028.5	53.0285						Low pollen numbers
33.64	53522.7	53.5227						Low pollen numbers
34.05	54101.6	54.1016						Low pollen numbers
34.44	54652.3	54.6523						Low pollen numbers
34.63	54920.6	54.9206						Low pollen numbers
34.94	55358.3	55.3583						Low pollen numbers
35.13	55626.6	55.6266						Low pollen numbers
35.54	56205.5	56.2055	19.0347	9.35244	19.4542	15.4112	14.5032	<200 pollen
35.94	56770.3	56.7703						Low pollen numbers
36.25	57208	57.208						Low pollen numbers
36.64	57758.7	57.7587						Low pollen numbers
37.04	58323.5	58.3235	14.0306	7.41148	14.8226	14.0306	12.2276	<200 pollen
37.44	58888.3	58.8883	28.7865	16.0495	30.73	26.1648	23.5149	<200 pollen
37.76	59340.1	59.3401						Low pollen numbers
38.14	59876.7	59.8767	17.5782	9.45531	19.6671	18.5718	16.1731	<200 pollen
38.53	60427.4	60.4274						Low pollen numbers
38.94	61006.3	61.0063	27.7432	11.8903	33.3084	29.867	25.0633	<200 pollen
39.44	61712.3	61.7123	22.3179	10.7321	24.0642	21.977	19.8223
39.83	62263	62.263						Low pollen numbers
39.84	62277.1	62.2771						Low pollen numbers
40.03	62545.4	62.5454						Low pollen numbers
40.4	63067.8	63.0678						Low pollen numbers
40.75	63562	63.562						Low pollen numbers
40.94	63830.3	63.8303						Low pollen numbers
41.14	64112.7	64.1127						Low pollen numbers
41.53	64663.4	64.6634	18.5155	10.8341	18.6907	16.0479	15.6979	<200 pollen
41.94	65242.3	65.2423						Low pollen numbers
42.44	72883.5	72.8835	20.4122	10.234	21.7487	19.3949	16.592
42.84	79510.3	79.5103	23.5842	8.5618	26.3028	23.1225	19.3608	<200 pollen
43.04	82823.7	82.8237	24.945	12.227	27.7597	24.4667	20.6848
43.44	89450.5	89.4505	29.8148	13.4258	32.9193	25.4617	24.4238	<200 pollen
43.65	92929.5	92.9295	22.3419	12.6393	28.7218	20.5881	15.2868
43.74	94420.6	94.4206	28.1974	17.6703	32.0305	24.4068	20.94	<200 pollen
44.14	101047	101.047	24.6481	12.6168	27.7906	22.3926	17.0763
44.24	102704	102.704	13.666	6.79694	16.8856	13.666	11.8023
44.34	104361	104.361	20.2497	14.5908	26.7077	19.723	16.518
44.44	106017	106.017	15.9884	7.93088	19.7731	17.9393	16.1044
44.54	107674	107.674	20.3307	13.57	28.5821	18.3214	13.7447
44.74	110988	110.988	18.6335	9.68071	23.1353	16.753	15.096
44.94	114301	114.301	28.9588	10.8034	32.9523	27.3164	23.1113
45	115295	115.295	23.411	9.08728	27.3894	22.9898	22.4144
45.14	117614	117.614	21.1835	5.7735	21.1835	19.4514	23.0596
45.34	120928	120.928	17.8317	4.42363	19.6908	17.4112	20.5117
45.44	122584	122.584	19.3495	6.40287	20.8426	18.9364	22.8716
45.54	122685	122.685	23.2677	4.2806	21.5357	21.5357	26.1807
45.64	122787	122.787
45.74	122889	122.889	12.8731	3.69709	12.8731	12.2967	17.6139
45.84	122990	122.99
45.94	123092	123.092	19.42	6.7972	20.6732	16.7484	21.8786
46.04	123194	123.194
46.14	123295	123.295	17.3228	9.07031	20.585	16.6426	21.1683
46.24	123397	123.397
46.34	123499	123.499	13.4653	6.22303	15.1473	12.7057	19.4452
46.46	123621	123.621
46.54	123702	123.702	4.96276	1.1547	6.11746	5.54011	15.1318
46.64	123804	123.804
46.75	123916	123.916	14.822	4.94239	15.5828	13.7663	20.1845
46.84	124007	124.007
46.94	124109	124.109	13.178	5.58253	15.4067	12.9396	18.4783
47.04	124211	124.211
47.14	124312	124.312	16.7212	6.45169	17.5206	15.8249	21.2929
47.24	124414	124.414
47.34	124516	124.516	11.8729	5.56233	14.0757	11.8729	17.6072
47.44	124617	124.617
47.54	124719	124.719	14.5908	8.82915	17.6176	14.83	19.787
47.64	124821	124.821
47.65	124831	124.831	17.2793	5.74918	17.5115	14.732	20.357
47.74	124923	124.923
47.84	125024	125.024	13.3238	3.69097	14.713	12.7484	18.389
47.94	125126	125.126
48.04	125228	125.228	16.1017	6.66335	15.5253	12.7978	18.8993
48.05	125238	125.238	17.7042	7.24447	18.2787	14.1733	18.7484
48.14	125329	125.329	18.533	7.39765	21.0767	17.9561	22.4038
48.24	125431	125.431	11.2723	5.03248	14.0814	11.8477	18.0015
48.34	125533	125.533	6.82466	2.13347	8.38647	7.39632	15.6062
48.44	125634	125.634	16.5376	5.81074	18.406	15.7211	20.291
48.54	125736	125.736	11.4074	5.09701	14.4247	11.6383	18.1381
48.65	125848	125.848	13.5992	4.18154	16.6261	13.8384	19.185
48.74	125940	125.94
48.84	126041	126.041	13.8533	7.0846	14.9499	11.0703	18.4083
49.04	126245	126.245
49.14	126346	126.346	14.9218	4.77973	15.105	13.347	20.1289
49.24	126448	126.448
49.34	126550	126.55	8.9154	4.81796	10.8704	8.9154	16.4231
49.44	126651	126.651
49.54	126753	126.753	12.1639	5.19625	15.8427	12.7374	17.7432
49.64	126855	126.855
49.74	126957	126.957	15.355	5.56233	18.373	15.355	20.9622
49.84	127058	127.058
49.96	127180	127.18	13.4769	4.93565	15.0211	12.9116	20.2249
50.06	127282	127.282
50.15	127374	127.374	15.8499	4.94073	19.6491	16.657	21.0001
50.27	127496	127.496
50.34	127567	127.567	12.1359	3.53777	15.119	12.6906	18.4427
50.35	127577	127.577
50.46	127689	127.689	10.1033	5.02305	12.8169	10.2396	16.6088
50.54	127770	127.77	7.17056	0.705346	7.87591	7.17056	15.1229
50.63	127862	127.862	7.30744	2.1547	8.30744	6.73009	15.2265
50.64	127872	127.872
50.74	127974	127.974	8.44753	2.9712	10.264	9.26402	16.7584
50.84	128075	128.075
50.94	128177	128.177	16.1613	4.87832	17.0972	16.1613	22.6626
51.04	128279	128.279
51.14	128380	128.38	18.0951	7.25052	20.2187	17.6356	21.1686
51.23	128733	128.733
51.33	129088	129.088	9.06164	1.96792	9.06164	7.90885	16.1524
51.44	129479	129.479
51.54	129833	129.833	13.4652	5.52242	15.5298	12.1918	17.9453
51.66	130259	130.259
51.68	130330	130.33	9.3675	2.87718	9.94293	11.0938	18.6318
51.76	130614	130.614
51.86	130969	130.969	10.2856	0.816497	9.7082	10.2856	18.0907
51.9	131111	131.111
52.02	131537	131.537	10.7412	3.45834	13.0468	11.894	19.3678
52.13	131927	131.927
52.26	132389	132.389	17.3419	7.72629	18.3419	15.0325	20.3261
52.29	132495	132.495
52.32	132602	132.602	13.2795	5.00627	16.4206	16.1615	19.6773
52.33	132637	132.637
52.34	132673	132.673	12.8679	5.19254	15.1199	12.8679	18.0362
52.5	133240	133.24	17.4974	9.34831	19.8714	16.2394	22.3422
53.38	136364	136.364	15.3297	10.5448	21.4496	19.0379	12.1724
53.4	136435	136.435	18.1428	11.7133	26.2108	20.0135	12.8893
53.5	136790	136.79	16.295	10.3029	21.5093	17.9407	11.0365
53.6	137144	137.144	14.5375	13.6786	22.5084	16.7424	11.9348
53.71	137535	137.535	15.2825	8.61695	21.4793	17.3987	11.5123
53.84	137996	137.996
54.05	138741	138.741	19.5659	14.416	26.3836	20.1185	13.4574

## Sheet: Uyuni
Depth (cm)	Depth m	Age (ka yr BP)	tropical forest	warm-temperate forest	temperate forest	grassland and dry shrubland	desert
825	8.25	17.0814	7.89676	5.87111	9.95707	8.43101	5.69493
995	9.95	20.0066	8.17936	5.49103	10.2782	11.8609	8.79621
1005	10.05	20.1732	11.1464	8.71908	16.2798	12.9545	8.27136
1015	10.15	20.3392	5.93643	4.39468	8.03422	7.62439	5.30524
1025	10.25	20.5047	6.61725	5.25133	8.85959	9.30471	6.98336
1035	10.35	20.6695	4.16991	2.65795	4.84551	5.39304	3.92377
1251	12.51	24.0924	6.08421	4.55771	7.52562	7.19815	5.05518
1260	12.6	24.2295	9.5993	7.46018	14.7524	12.2171	7.50973
1270	12.7	24.3814	4.82628	4.63896	7.64576	6.77749	4.50274
1280	12.8	24.5328	3.42486	2.14399	4.42026	4.36879	3.02949
1290	12.9	24.6836	5.38797	4.98899	8.69893	6.58104	4.03097
1300	13	24.8339	3.45675	3.40115	5.82837	5.01457	3.28546
1320	13.2	25.1331	4.40906	3.93375	6.09297	5.69449	3.42508
1330	13.3	25.2819	4.28604	4.42836	6.77476	5.29627	3.54788
1340	13.4	25.4302	6.26835	6.30963	8.83048	8.28862	5.70219
1350	13.5	25.578	5.10053	4.37885	7.59424	6.66691	3.6695
1358	13.58	25.6959
1430	14.3	26.7427	3.44469	3.21483	5.08314	4.79993	3.36116
1440	14.4	26.8862	2.2653	2.55387	3.85045	3.18872	2.23956
1450	14.5	27.0291	3.78569	2.41504	4.65365	5.13548	3.41617
1460	14.6	27.1716	3.35206	2.77305	3.70445	3.77722	2.88833
1480	14.8	27.4552	2.83043	3.33601	4.91714	4.56641	2.6751
1490	14.9	27.5962	3.03583	1.95167	3.57309	4.05123	2.58766
1500	15	27.7369	3.70036	3.64562	5.33563	5.23123	3.21205
1510	15.1	27.877	2.38191	2.71631	4.40071	3.53935	2.59024
1520	15.2	28.0168	5.35673	4.38568	8.65051	8.77547	6.05
1530	15.3	28.156	2.63964	2.94987	4.55713	3.84117	2.54153
1540	15.4	28.2948	4.70199	4.37715	7.54521	6.457	4.47735
1550	15.5	28.4332	3.47594	2.51494	4.47941	5.17136	3.47582
1560	15.6	28.5711	3.77689	3.25273	5.15927	4.77715	2.85231
1570	15.7	28.7086	4.48463	4.81948	7.50572	6.60644	4.48463
1624	16.24	29.4435	4.07643	3.68899	6.19662	5.5899	3.56324
1705	17.05	30.5228
1710	17.1	30.5886
1720	17.2	30.7197	4.83277	4.06876	6.84261	6.53936	4.08305
1745	17.45	31.046	4.14258	2.70176	4.95105	4.42963	3.11098
1755	17.55	31.1757	2.40736	1.8346	3.822	3.71791	2.3499
1765	17.65	31.3051	2.65812	2.33139	3.99468	3.7214	2.34256
1775	17.75	31.4342	2.627	1.21538	3.11173	3.35689	2.16639
1840	18.4	32.2635	3.37194	2.48099	4.91691	4.47581	2.99685
2260	22.6	37.2773	5.80587	4.71489	8.13686	6.45221	3.69976
2270	22.7	37.3903	3.3845	2.77803	4.91872	4.12068	2.40295
2280	22.8	37.503	3.83257	3.21171	5.4224	4.77737	2.68519
2290	22.9	37.6154	3.44817	1.19587	3.75232	4.1882	2.5692
2345	23.45	38.2295	6.60308	5.40081	10.1478	9.65696	5.51833
2355	23.55	38.3404	9.7857	6.56397	13.2072	13.1784	8.29541
2365	23.65	38.451	6.94121	5.70483	10.1493	9.34242	6.05417
2385	23.85	38.6715	7.28862	5.5769	9.53721	8.91753	6.33994
2395	23.95	38.7814	5.84814	5.40896	10.0715	8.45608	4.38327
2405	24.05	38.891	4.80585	3.19654	6.48718	5.34369	3.34144
2512	25.12	40.0507	2.07105	0.950668	2.45338	2.59099	1.74773
2535	25.35	40.2969	3.94958	4.18105	7.30863	5.59234	2.97743
2540	25.4	40.3503	4.08087	3.09879	6.08391	5.17661	2.98208
2560	25.6	40.5633	3.39662	2.42121	5.28838	4.86246	2.6798
2570	25.7	40.6695	6.3694	3.42215	8.18569	7.54748	4.4193
2580	25.8	40.7755	5.57118	3.38354	8.2601	7.55137	4.46113
2590	25.9	40.8814	6.93546	2.82111	7.53712	7.70511	4.61452
2665	26.65	41.6695	2.91954	1.46856	3.96311	4.58556	2.62132
2670	26.7	41.7217	9.38671	7.69208	12.5279	11.0807	5.64582
2675	26.75	41.7739	8.10396	4.14705	9.4773	9.10301	4.92141
2685	26.85	41.8781	3.37744	1.66809	4.80723	5.23518	3.03211
2695	26.95	41.9821	4.35289	2.44598	5.70123	6.55825	3.41305
2705	27.05	42.086	6.59652	2.91423	7.1957	7.98111	4.92747
2715	27.15	42.1897	3.88625	3.00887	5.66621	4.78591	2.49783
2725	27.25	42.2933	2.01271	1.13673	2.53784	2.9499	1.89021
2735	27.35	42.3967	2.68205	2.6394	4.86679	4.34489	2.54921
2745	27.45	42.4999	3.59797	1.93475	4.4665	5.47299	3.69802
2753	27.53	42.5825	3.6314	2.94972	6.09375	6.36156	3.15084
2815	28.15	43.2188	5.53684	4.23825	7.78117	6.21167	3.77944
2825	28.25	43.321	1.65504	1.30177	2.80624	2.93768	1.75695
2838	28.38	43.4536	3.27051	2.33224	4.9547	4.31627	2.41672
2850	28.5	43.5758	4.9717	3.15298	5.61295	5.63096	3.36721
2965	29.65	44.7387	6.53874	4.11256	8.51018	8.90097	5.63721
2975	29.75	44.8392	5.62995	4.84729	8.28926	7.75536	4.46443
2985	29.85	44.9396	2.94716	1.58111	4.27169	3.73799	2.11165
2995	29.95	45.0399	5.578	2.93159	6.2703	6.71534	4.13885
3005	30.05	45.1401	4.09056	3.40018	6.32332	6.29035	3.35107
3015	30.15	45.2402	2.45692	1.98714	3.82089	3.43989	1.7323
3025	30.25	45.3402	4.59377	2.64835	5.77733	5.30078	3.40203
3045	30.45	45.54	4.17151	3.37599	5.64939	5.38326	3.31147
3055	30.55	45.6398	5.76432	5.31176	8.80331	7.21408	4.1449
3065	30.65	45.7395	5.59745	5.95674	9.12654	7.1601	3.95711
3075	30.75	45.8392	5.61247	3.7057	8.23743	7.38885	3.92751
3085	30.85	45.9388	6.57811	6.24096	9.21043	7.70191	4.1608
3095	30.95	46.0383	4.27616	3.60079	6.59004	5.39007	4.05455
3105	31.05	46.1377	3.25946	3.77964	6.09419	5.14928	4.20437
3115	31.15	46.2371	4.98112	4.50156	6.93369	6.34958	4.60829
3120	31.2	46.2867	5.27584	3.66592	7.66393	7.02081	4.20853
3130	31.3	46.386	2.91523	1.42126	3.77028	3.90873	2.11295
3140	31.4	46.4852	3.76789	2.34666	5.02587	4.65972	3.06971
3150	31.5	46.5844	5.17052	3.00104	6.43729	6.4492	3.92153
3160	31.6	46.6835	1.99754	1.85332	3.4924	2.835	1.44442
3170	31.7	46.7825	6.45819	3.42703	7.87483	8.62396	5.37701
3180	31.8	46.8815	4.06134	2.7992	5.06651	5.10941	3.66409
3190	31.9	46.9805	5.35759	2.52294	7.52062	8.2462	4.07454
3200	32	47.0794	2.71267	1.7925	3.32854	3.10016	1.89182
3220	32.2	47.2771	4.18074	3.73427	6.43372	5.7072	3.33389
3240	32.4	47.4747	2.23595	1.56249	2.69574	2.35882	1.17067
3260	32.6	47.6721	3.54706	2.19472	4.44521	5.41975	3.54908
3280	32.8	47.8694	2.62549	2.03342	3.88387	3.45361	2.09978
3310	33.1	48.1651	4.20417	2.46166	5.94986	5.55434	2.6957
3315	33.15	48.2144	6.04607	5.70944	11.2314	9.53521	5.08772
3320	33.2	48.2637	5.21339	4.27179	7.76512	7.29638	4.80392
3330	33.3	48.3622	3.19369	1.86064	4.17244	3.4537	1.93462
3440	34.4	49.4456	2.00158	1.71609	2.85688	3.02904	1.75535
3450	34.5	49.5441	4.05542	3.02417	5.59553	4.61019	2.7991
3610	36.1	51.1233	3.32124	2.03857	4.27505	4.42798	2.83333
3620	36.2	51.2224	2.97762	1.57148	3.77698	4.22786	2.91361
3630	36.3	51.3214	3.30179	2.05892	4.35199	5.11135	2.99146
3640	36.4	51.4205	2.25748	1.93331	3.18488	2.62097	1.84185
3650	36.5	51.5197	2.75012	1.61733	3.26349	3.91166	2.91898
3670	36.7	51.7182	2.45335	0.838744	3.29209	3.89612	2.73127
3680	36.8	51.8175	7.5344	4.55708	8.81357	9.48177	6.99304
4305	43.05	58.2323	5.18075	1.94109	5.89779	7.77827	5.92751
4315	43.15	58.3396	4.44032	4.13668	7.19321	7.71126	5.22118
4320	43.2	58.3934	5.52442	4.28253	8.32172	8.41645	6.31928
4640	46.4	61.9432	9.60151	6.09494	13.1795	11.7153	6.46847
5321	53.21	70.4372	5.23905	2.44987	6.42793	8.00336	5.28629
5385	53.85	71.3166	5.30918	2.77152	7.23855	7.85446	4.21818
5405	54.05	71.5946	5.60584	3.58979	8.47767	7.87622	4.54077
5513	55.13	73.1234	4.67137	4.78683	7.63583	8.41825	5.67137
5523	55.23	73.2673	2.34131	1.93368	3.53397	3.82824	2.67959
5533	55.33	73.4117	6.40804	6.56235	10.1165	7.90457	4.85364
6365	63.65	87.0219	2.93676	2.41999	4.83758	3.97511	2.18422
6375	63.75	87.2066	2.44511	1.71162	3.35785	3.0754	1.94561
7110	71.1	102.368	6.481	5.80816	10.1692	10.9454	6.05199
7130	71.3	102.827	7.39686	4.77844	9.75867	10.7729	6.56364
7150	71.5	103.289	1.74078	3.48155	5.22233	3.48155	1.74078
7170	71.7	103.753	4.08248	0	4.08248	4.08248	0
7190	71.9	104.22	6.75248	4.52234	9.04899	9.59442	5.78306
7828	78.28	120.542	5.05027	4.61889	7.75072	6.62908	4.15872

## Sheet: Petén-Itzá
Depth (mblf)	Age	Age (ka), assumed BP	tropical forest	warm-temperate forest	temperate forest	grassland and dry shrubland	desert
0.035	17.83	0.01783	34.9383	38.9437	18.0217	4.85755	4.85755
0.52	264.98	0.26498
1.54	784.74	0.78474	37.8756	40.9689	26.3906	9.11768	7.48422
2.567	1308.06	1.30806	34.2501	35.586	23.1736	7.77275	7.77275
2.94	1498.13	1.49813	33.7139	33.3129	22.998	9.87997	8.34694
4.602	2371.95	2.37195	35.8455	35.6747	24.3974	10.4498	9.40579
5.512	2893.68	2.89368	34.3411	39.4376	23.3141	6.8831	5.05813
5.806	3062.24	3.06224	25.3987	27.7335	18.4067	4.80562	4.80562
6.643	3542.12	3.54212	25.9388	33.7987	19.983	4.18445	4.18445
7.748	4175.65	4.17565	33.0865	35.4007	20.0001	6.29606	4.97701
8.179	4476.71	4.47671	35.6148	38.1173	13.5642	2.07396	2.07396
8.704	5063.81	5.06381	31.4395	34.6513	11.9521	3.89363	3.89363
9.479	6929.12	6.92912	29.5954	32.3274	11.5848	2.17515	1.64737
9.669	7469.3	7.4693
9.709	7583.02	7.58302	32.6594	35.5929	13.738	2.07698	1.78425
9.804	7853.11	7.85311
9.904	8137.42	8.13742	26.8264	30.0878	10.1986	1.50467	1.09878
10.107	8714.56	8.71456	26.2387	29.0888	8.47229	1.42025	1.42025
10.212	9013.08	9.01308	25.6127	27.0581	8.80473	1.81109	1.4072
10.247	9112.58	9.11258
10.332	9354.24	9.35424	25.6869	29.8528	12.7151	4.0342	3.22987
10.397	9539.04	9.53904
10.507	9713.31	9.71331
10.712	10003.5	10.0035
10.802	10130.9	10.1309
10.927	10306.9	10.3069
11.052	10467.9	10.4679	35.4383	40.5086	21.5535	4.75748	4.75748
11.157	10615.5	10.6155
11.197	10669.2	10.6692
11.247	10736.2	10.7363
11.317	10830.2	10.8302
11.456	10991.2	10.9912	25.3271	35.0104	21.5324	4.06326	3.62765
11.611	11192.4	11.1924	22.1119	31.709	20.3903	6.22493	5.74381
11.711	11326.6	11.3266
11.811	11460.7	11.4607
11.911	11594.9	11.5949	25.7499	29.7824	17.875	5.94168	5.47794
12.011	11729.1	11.7291
12.101	11856.5	11.8565
12.211	12010.8	12.0108	32.791	37.8243	22.6066	5.33313	4.79318
12.311	12145	12.145
12.411	12279.2	12.2792
12.511	12413.3	12.4133
12.611	12547.5	12.5475
12.711	12681.6	12.6816	27.2644	31.3757	22.6869	8.62961	8.17222
12.836	12856.1	12.8561
12.936	12990.2	12.9902
13.061	13111	13.111
13.146	13134.9	13.1349
13.236	13158.8	13.1588	26.8564	35.9325	23.6557	3.88308	3.88308
13.336	13185.3	13.1853
13.426	13251.4	13.2514
13.511	13253	13.253
13.611	13254.9	13.2549
13.711	13256.9	13.2569	24.1722	33.6834	25.6539	7.66434	7.22239
13.796	13258.6	13.2586
13.881	13272.1	13.2721
13.961	13368.9	13.3689
14.046	13477.9	13.4779	25.1698	32.6052	23.2543	7.1473	7.1473
14.126	13574.7	13.5747
14.211	13671.5	13.6715
14.321	13962.5	13.9625
14.431	14346.5	14.3465	28.8252	36.5965	23.9901	7.80091	7.80091
14.531	14599.8	14.5998
14.711	14702.5	14.7025
14.936	14833.7	14.8337	25.911	33.607	23.8689	6.80968	5.09486
15.111	14930.7	14.9307
15.511	15158.9	15.1589
15.686	15233.1	15.2331	21.624	27.7529	18.7414	8.04929	6.35898
15.911	15358.6	15.3586
16.111	15472.7	15.4727
16.31	15569.7	15.5697	24.87	29.4708	20.389	6.63934	5.04745
16.71	15797.9	15.7979
17.06	16125.5	16.1256
17.26	16331.2	16.3312	20.1194	24.8099	23.1542	11.4967	9.05691
17.445	16536.8	16.5368
17.71	16717	16.717
17.91	16857.1	16.8571	21.5904	24.8835	22.3906	13.1499	12.0572
18.11	16997.2	16.9972
18.285	17123.3	17.1233
18.51	17277.4	17.2774	18.7651	26.2035	21.385	5.86651	4.0617
18.71	17417.5	17.4175
18.91	17557.6	17.5576
19.1	17690.7	17.6907	20.3788	25.3818	20.627	7.5584	6.38799
19.311	17816.8	17.8168
19.511	17956.9	17.9569
19.666	18068.9	18.0689
19.791	18142.2	18.1422
19.91	18183.2	18.1832
19.961	18200.2	18.2002
20.061	18234.3	18.2343	11.7859	22.0056	21.974	5.19242	4.06478
20.161	18268.5	18.2685
20.278	18309.4	18.3094
20.323	18323	18.323
20.361	18331.6	18.3316
20.366	18332.4	18.3324
20.47	18364	18.364
20.56	18394.7	18.3947
20.66	18428.8	18.4288
20.85	18493.6	18.4936
20.945	18527.7	18.5277
21.025	18551.6	18.5516
21.11	18582.3	18.5823	16.735	26.5123	23.4261	4.6351	3.44025
21.21	18622.8	18.6228	9.09703	21.8692	22.4529	4.26718	3.26789
21.299	18711	18.711
21.409	18818.8	18.8188
21.509	18916.8	18.9169	12.3849	24.7221	22.8543	4.73468	3.79479
21.633	19034.5	19.0345
21.747	19152.1	19.1521
21.762	19161.9	19.1619	14.588	27.9387	24.2814	4.55491	4.55491
21.887	19289.3	19.2893
22.011	19406.9	19.4069
22.111	19505	19.505
22.211	19603	19.603
22.396	19789.2	19.7892
22.501	19887.2	19.8872	11.577	24.2366	22.6999	3.66541	3.0004
22.611	19995	19.995
22.711	20093	20.093
22.811	20191.1	20.1911
22.911	20289.1	20.2891	12.4166	24.7289	22.3456	4.22105	3.53201
23.031	20406.7	20.4067
23.146	20524.3	20.5243
23.26	20612.5	20.6125	11.2528	24.2593	22.2227	4.72701	4.10178
23.385	20740	20.74
23.51	20857.6	20.8576
23.685	21089.5	21.0895
23.735	21220.2	21.2202	13.2258	26.2938	23.8849	4.22471	3.78469
23.825	21455.3	21.4553
24.01	21951.8	21.9518	15.4832	27.4619	26.435	6.46168	5.35466
24.11	22213.1	22.2131
24.21	22474.4	22.4744	15.5707	28.5284	26.4189	6.36875	5.46864
24.39	22944.8	22.9447	15.5263	26.926	24.2675	6.51026	5.81563
24.56	23389	23.389	21.2609	30.7581	26.0718	8.41934	7.18581
24.655	23603.3	23.6033
24.755	23626.9	23.6269	17.3799	30.7952	25.9343	4.75116	4.75116
24.904	23669	23.669
25.057	23711.1	23.7111
25.101	23721.6	23.7216	20.4623	32.5113	28.1899	7.66213	7.66213
25.21	23750.6	23.7506
25.31	23776.9	23.7769
25.394	23797.9	23.7979
25.508	23832.1	23.8321	20.3506	28.0019	22.4195	5.05816	4.14529
25.592	23853.2	23.8532
25.69	23879.5	23.8795
25.79	23960.9	23.9609
25.91	24114.4	24.1144
26.03	24256.1	24.2561
26.125	24344.7	24.3447	19.3875	26.3351	18.9862	6.65498	5.29066
26.25	24480.5	24.4805
26.37	24634.1	24.6341
26.51	24799.4	24.7994
26.625	24929.3	24.9293	19.6911	28.4078	25.4234	7.06981	6.67171
26.76	25106.5	25.1065
26.885	25260	25.26
27.01	25401.7	25.4017	14.7418	25.3643	23.0393	4.61811	3.59709
27.135	25567.1	25.5671
27.384	25826.9	25.8269	20.8716	29.2827	24.5812	5.96066	5.38759
27.513	25980.4	25.9804
27.621	26110.4	26.1104
27.761	26275.7	26.2757
27.885	26431.5	26.4315	19.5559	27.6459	24.5716	6.78954	5.95271
27.989	26555.4	26.5554
28.008	26580.2	26.5802
28.108	26704.1	26.7041
28.207	26828	26.828	19.8374	28.8068	26.0282	7.98852	6.89483
28.306	26951.8	26.9518
28.406	27050.9	27.0509
28.609	27298.7	27.2987	18.4311	27.866	25.1737	7.59351	7.1107
28.709	27422.5	27.4225
28.808	27546.4	27.5464
28.912	27670.3	27.6703
29.041	27831.3	27.8313	20.2875	29.3274	25.3534	7.28875	6.33744
29.14	27955.2	27.9552
29.358	28299.7	28.2997
29.452	28443.6	28.4436	19.9562	28.326	25.5125	7.98249	7.54974
29.537	28587.5	28.5875
29.624	28731.4	28.7314	20.2465	23.9874	18.6833	5.72591	4.96341
29.726	28907.2	28.9072
29.825	29051.1	29.0511
29.925	29227	29.227	22.079	28.9232	25.5573	6.28608	5.7204
30.002	29338.9	29.3389
30.025	29370.8	29.3708
30.26	29754.5	29.7545	23.3977	30.2726	25.184	7.91766	6.31466
30.444	30058.3	30.0583
30.642	30378	30.378
30.811	30492.7	30.4927	18.7361	23.1531	20.1148	6.5618	5.07767
30.979	30607.3	30.6073
31.148	30722	30.722
31.327	30843.4	30.8434	23.5702	27.6263	21.7997	8.39943	8.39943
31.73	31093	31.093
31.943	31306.6	31.3066	17.0588	26.7882	23.2512	5.77278	5.06744
32.172	31608.2	31.6082
32.409	31936	31.936	22.4569	31.0268	26.126	6.48292	6.48292
32.579	32159	32.159
32.758	32395	32.395	16.1599	25.8227	21.9992	5.0368	4.62211
32.939	32591.7	32.5917
33.173	32893.3	32.8933	20.6405	27.4024	23.7466	7.27486	6.615
33.412	33208.1	33.2081
33.661	33549.1	33.5491	27.0188	35.9462	28.0258	7.59792	6.05593
33.9	33877.1	33.8771
34.135	34222.2	34.2222	22.5966	30.4038	26.9585	8.01416	7.16367
34.41	34642.4	34.6424	21.1084	30.311	22.1143	4.49987	4.49987
34.629	34987.6	34.9876
34.853	35317.8	35.3178	17.866	27.7361	24.3142	6.10476	4.8437
35.082	35662.9	35.6629
35.31	35862.1	35.8621	23.8869	30.949	23.4456	6.26155	5.33845
35.562	36069.2	36.0692
35.81	36305.2	36.3052	24.6245	30.9186	25.4758	8.59293	7.89788
36.058	36541.2	36.5412
36.307	36778.2	36.7782	19.2575	29.5803	25.6887	5.30799	5.30799
36.562	37020.8	37.0208
36.812	37258.8	37.2588	20.9585	27.4405	21.766	5.22897	5.22897
37.061	37495.7	37.4957
37.311	37733.6	37.7336	23.2446	32.563	24.6369	5.42996	4.8941
37.525	37937.3	37.9373
37.744	38145.7	38.1457	20.6066	26.4656	19.1606	6.85635	5.96724
37.978	38311.6	38.3116
38.208	38447.9	38.4479
38.46	38597.2	38.5972	17.6786	24.4439	15.3077	4.11806	3.07264
38.709	38744.7	38.7447
38.958	38892.3	38.8923
39.212	39042.8	39.0428
39.461	39190.3	39.1903	18.7236	28.4753	24.3221	5.07302	3.89227
39.708	39336.7	39.3367
39.968	39490.7	39.4907
40.01	39515.6	39.5156
40.427	39762.7	39.7627	18.4011	28.4361	23.4945	4.50762	3.99088
40.637	39887.1	39.8871
41.255	40253.3	40.2533
41.509	40403.8	40.4038	19.7244	31.0795	22.4763	4.54084	3.985
41.759	40551.9	40.5519
42.004	40697.1	40.6971	20.3624	30.4531	24.6507	6.20725	5.29656
42.232	40832.2	40.8321
42.512	40998.1	40.9981
42.757	41143.2	41.1432	16.6722	27.9429	22.4099	3.99898	3.43599
43.012	41336.2	41.3362
43.267	41529.7	41.5297
43.537	41734.6	41.7346	16.0828	25.9825	20.3092	4.90852	4.90852
43.752	41897.8	41.8978
44.012	42095.1	42.0951	21.4659	26.2935	23.6652	9.37744	8.25354
44.257	42281	42.281
44.511	42473.7	42.4737
44.751	42655.8	42.6558
45.011	42853.1	42.8531	22.7655	33.6684	23.3745	2.6902	2.6902
45.511	43358.1	43.3581
45.631	43524.1	43.5241	18.3107	29.2709	22.8921	3.79697	3.50387
45.751	43690.1	43.6901
45.876	43863.1	43.8631	16.3513	26.8319	22.1572	3.93165	3.93165
46.111	44188.2	44.1882
46.221	44340.4	44.3404	17.3156	27.8365	24.8816	4.89935	4.30907
46.321	44478.8	44.4788
46.441	44644.8	44.6448	13.5765	27.4124	21.9236	3.19819	2.93557
46.581	44838.5	44.8385
46.721	45032.2	45.0322	16.1253	28.5845	23.9095	4.24409	3.94555
46.861	45225.9	45.2259
47.011	45433.4	45.4334
47.116	45578.7	45.5787	16.4682	29.2608	21.181	2.73921	2.73921
47.251	45765.5	45.7655
47.376	45938.4	45.9384
47.511	46125.2	46.1252
47.626	46284.3	46.2843	20.6743	29.2318	24.9082	7.15525	6.82394
47.751	46457.2	46.4572
47.876	46630.2	46.6302
48.011	46816.9	46.8169	19.9658	30.1465	22.2141	3.08911	2.80828
48.126	46976.1	46.9761
48.251	47149	47.149
48.376	47321.9	47.3219	18.4412	25.7535	19.1556	6.30764	5.81498
48.51	47507.3	47.5073
48.625	47666.4	47.6664	19.4039	27.892	21.3832	5.23408	3.51507
48.87	48005.4	48.0054
49.01	48199.1	48.1991
49.12	48351.3	48.3513	18.396	25.1402	20.1537	6.91342	4.8165
49.24	48517.3	48.5173
49.36	48683.3	48.6833
49.47	48835.5	48.8355	17.5858	27.0332	21.836	6.65127	5.51576
49.58	48987.7	48.9877
49.693	49144.1	49.1441
49.808	49303.2	49.3032	15.5802	25.4492	22.5615	5.50987	4.23277
49.928	49469.2	49.4692
50.053	49642.1	49.6421	8.07103	18.4061	16.9154	0	0
50.178	49815.1	49.8151
50.308	49994.9	49.9949
50.418	50147.1	50.1471
50.533	50306.2	50.3062	13.118	23.8044	21.2342	4.26356	2.87256
50.678	50506.9	50.5069
50.808	50686.7	50.6867
50.928	50852.7	50.8527	14.5672	25.1287	21.818	5.85154	5.03829
51.052	51024.3	51.0243
51.31	51381.3	51.3813	17.3331	28.422	23.3908	3.30505	3.30505
51.427	51543.1	51.5431
51.55	51713.3	51.7133
51.677	51889	51.889	13.0393	26.4741	22.2556	3.15704	3.15704
51.809	52071.6	52.0716
51.927	52234.9	52.2349	10.0921	23.0972	21.1167	2.11163	2.11163
52.054	52410.6	52.4106
52.176	52579.4	52.5794
52.355	52827.1	52.8271	12.8369	23.7194	20.7948	3.70626	3.20874
52.492	53018.9	53.0189
52.591	53174.8	53.1748
52.73	53393.7	53.3937	13.6178	23.9406	21.4693	4.59889	3.59951
52.857	53593.7	53.5937
53.003	53823.6	53.8236
53.14	54039.4	54.0394	15.1161	24.9963	21.9775	3.25254	2.66328
53.281	54261.4	54.2614
53.408	54461.4	54.4614
53.521	54639.4	54.6394
53.743	54989	54.989
53.851	55169.9	55.1699	14.5819	26.484	22.2609	4.43037	3.97322
53.959	55351.6	55.3516
54.09	55571.9	55.5719
54.23	55807.4	55.8074	16.6419	26.5266	21.6767	3.89608	3.54252
54.371	56044.6	56.0446
54.508	56275.1	56.2751
54.65	56513.9	56.5139	8.60153	20.0481	19.0602	2.12379	2.12379
54.791	56751.1	56.7511
55.074	57227.2	57.2272
55.193	57427.3	57.4273
55.312	57627.5	57.6275	18.9671	28.9491	25.522	6.28951	5.20485
55.559	58043	58.043
55.691	58265	58.265
55.833	58503.9	58.5039	15.1533	25.2504	22.6278	4.805	4.49296
55.97	58734.3	58.7343
56.107	58964.8	58.9648
56.381	59425.7	59.4257	8.0104	18.9324	18.9904	2.43524	1.87491
56.522	59662.9	59.6629
56.659	59893.3	59.8933
56.787	60108.6	60.1086
56.799	60128.8	60.1288	10.3858	24.8475	22.0913	2.75766	2.14622
56.934	60355.9	60.3559
57.074	60591.4	60.5914
57.209	60818.5	60.8185
57.324	61011.9	61.0119	20.5991	30.8473	22.99	2.91142	2.38547
57.454	61230.6	61.2306
57.579	61440.9	61.4409
57.754	61735.3	61.7353
57.894	61970.8	61.9708	12.2071	25.3406	22.3996	2.80237	2.29954
58.024	62189.4	62.1894
58.174	62441.8	62.4418
58.299	62652	62.652	18.5268	32.37	27.828	5.51332	4.61063
58.424	62862.3	62.8623
58.55	63074.2	63.0742
58.67	63276.1	63.2761
58.79	63478	63.478	13.4161	26.7996	23.3544	2.55953	2.26348
58.91	63679.8	63.6798
59.034	63888.4	63.8884
59.154	64090.3	64.0903	17.1371	30.9636	24.8511	3.79683	3.79683
59.274	64292.1	64.2921
59.394	64494	64.494
59.509	64687.4	64.6874
59.634	64897.7	64.8977	24.4873	35.523	26.2223	5.18447	4.78221
59.75	65092.8	65.0928
59.87	65294.7	65.2947
59.994	65503.2	65.5032
60.109	65696.7	65.6967
60.233	65905.3	65.9053	18.3818	29.8202	23.619	2.59306	2.16031
60.353	66107.1	66.1071
60.472	66307.3	66.3073
60.597	66517.6	66.5176	22.0993	32.8912	23.1524	2.81233	2.81233
60.753	66780	66.78
60.884	67000.4	67.0004	21.7641	32.6772	23.5106	2.75514	2.75514
61.022	67232.5	67.2325
61.16	67464.6	67.4646
61.312	67720.3	67.7203
61.44	67935.6	67.9356	27.1332	36.8905	25.2363	5.46052	4.45196
61.583	68176.2	68.1762
61.707	68384.7	68.3847	23.6111	35.2929	26.5835	4.66554	4.66554
61.841	68610.1	68.6101
61.983	68849	68.849	21.4323	32.9135	24.7182	4.41124	4.41124
62.124	69086.2	69.0862
62.26	69315	69.315	26.3512	36.8647	28.4725	5.86046	5.30915
62.4	69550.5	69.5505
62.532	69772.5	69.7725	17.9436	30.2662	24.7664	3.28877	2.9905
62.682	70024.8	70.0248
62.811	70241.8	70.2418
62.942	70462.2	70.4622	25.0366	34.6699	25.1084	3.00429	2.55254
63.053	70648.9	70.6489
63.17	70845.7	70.8457	25.4697	34.5088	24.8196	4.33474	3.94281
63.277	71025.7	71.0257
63.421	71267.9	71.2679	16.6536	27.9047	22.5408	2.93509	2.62809
63.561	71503.4	71.5034
63.696	71730.5	71.7305	21.7217	31.2565	23.9948	3.05037	3.05037
63.861	72008.1	72.0081
64.002	72245.2	72.2452	24.8434	35.0475	25.9942	3.5552	3.5552
64.143	72482.4	72.4824
64.283	72717.9	72.7179	21.9485	33.243	24.5861	4.43064	3.9695
64.41	72931.6	72.9316
64.551	73168.7	73.1687
64.692	73405.9	73.4059	23.3318	34.3431	23.5969	3.40869	3.40869
64.833	73643.1	73.6431
64.96	73856.7	73.8567	18.0801	30.2282	23.2253	3.18851	2.75041
65.1	74092.2	74.0922
65.241	74329.4	74.3294	26.7611	37.9505	27.8866	5.71112	5.3149
65.384	74569.9	74.5699
65.509	74780.2	74.7802	23.7728	34.8437	28.5698	7.53306	6.85629
65.64	75000.6	75.0006
65.762	75205.8	75.2058	24.0745	32.9955	24.4991	4.59165	4.04772
65.901	75439.6	75.4396
66.035	75665	75.665	22.6533	32.2154	22.913	3.32457	2.2679
66.15	75858.5	75.8585
66.27	76060.3	76.0603
66.394	76268.9	76.2689	23.5458	33.4631	23.9161	3.69528	3.31236
66.509	76462.4	76.4624
66.633	76670.9	76.6709	26.0354	34.7139	22.4333	2.7868	2.7868
66.766	76894.7	76.8947
66.885	77094.8	77.0948
67.009	77303.4	77.3034	26.7063	37.3771	25.857	3.92953	3.37737
67.133	77512	77.512
67.251	77710.5	77.7105	21.8041	31.183	23.1471	1.86427	1.86427
67.37	77910.7	77.9107
67.494	78119.3	78.1193	22.152	32.8024	23.5822	3.93229	3.93229
67.621	78332.9	78.3329
67.745	78541.5	78.5415	27.1449	35.2823	23.9697	4.63981	3.85472
67.813	78655.9	78.6559
68.012	78990.6	78.9906
68.126	79182.4	79.1824	25.0591	33.3191	23.4549	4.23133	3.04348
68.24	79374.1	79.3741
68.358	79572.6	79.5726
68.426	79687	79.687	25.3447	35.2427	24.0004	3.78939	3.78939
68.566	79922.5	79.9225
68.68	80114.3	80.1143
68.794	80306	80.306
68.918	80514.6	80.5146	21.0104	29.6644	24.219	4.06438	3.28647
69.042	80723.2	80.7232
69.162	80925.1	80.9251	31.7154	34.1281	22.9239	6.75425	5.51087
69.282	81126.9	81.1269
69.412	81345.6	81.3456
69.537	81555.9	81.5559	31.8604	37.1062	24.5299	6.32259	4.77956
69.662	81766.1	81.7661	25.7246	35.2949	23.7138	3.29602	2.85147
69.787	81976.4	81.9764
69.912	82186.7	82.1867
70.162	82607.2	82.6072	29.1079	35.8441	25.1214	4.87177	4.37609
70.287	82817.5	82.8175	38.9614	36.0709	23.9884	7.43671	5.84334
70.412	83027.7	83.0277
70.535	83234.6	83.2346	28.1198	33.9907	23.1506	5.04278	5.04278
70.66	83444.9	83.4449
70.758	83609.7	83.6097
70.91	83865.4	83.8654	29.0895	38.5627	24.4041	5.09268	4.42001
71.035	84075.7	84.0757
71.16	84286	84.286	27.2867	34.4499	25.1961	3.36795	2.91666
71.285	84496.2	84.4962
71.41	84706.5	84.7065	34.5514	40.8595	28.4902	7.27624	6.45517
71.52	84891.5	84.8915
71.63	85076.6	85.0766
71.74	85261.6	85.2616	29.6145	35.2256	25.0422	7.14264	6.48255
71.84	85429.8	85.4298
72.05	85783.1	85.7831	28.241	35.5952	24.4733	3.60414	3.60414
